# Supplementary material for: Early anteroposterior regionalisation of human neural crest is shaped by a pro-mesodermal factor
Source: eLife. 2022 Sep 26;11:e74263. doi: 10.7554/eLife.74263 (PMC9536837; doi:10.7554/eLife.74263)
Supplement: Supplementary file 1. [file elife-74263-supp1.xlsx]

## Sheet: Sheet1
	baseMean	log2FoldChange	lfcSE	stat	pvalue	padj	gene_name
ENSG00000146374	513.179	-8.84239	0.556334	-15.894	6.96854e-57	5.93963e-53	RSPO3
ENSG00000151379	122.769	-8.01209	1.7348	-4.61845	3.86621e-06	0.000419792	MSGN1
ENSG00000163492	52.605	-7.03887	1.3325	-5.28244	1.27473e-07	2.01207e-05	CCDC141
ENSG00000249945	7.91938	-6.98866	1.5079	-4.63469	3.57472e-06	0.00039315	RP11-598D14.1
ENSG00000254365	8.39955	-6.8913	1.69423	-4.06752	4.75157e-05	0.00317647	CTB-180C19.1
ENSG00000281028	12.6736	-6.32482	1.51421	-4.17696	2.9543e-05	0.00222841	PI4K2B
ENSG00000254297	9.58245	-6.01335	1.72001	-3.49611	0.0004721	0.0182492	CTC-286N12.1
ENSG00000259948	8.74215	-5.9501	1.69098	-3.51873	0.000433622	0.0172079	RP11-326A19.5
ENSG00000104415	30.3293	-5.92314	1.0478	-5.65294	1.57727e-08	3.63348e-06	WISP1
ENSG00000128645	89.0226	-5.86251	1.19266	-4.91551	8.85526e-07	0.000113501	HOXD1
ENSG00000124780	9.25524	-5.76332	1.65574	-3.48081	0.000499906	0.0188121	KCNK17
ENSG00000128652	16.2186	-5.75675	1.34037	-4.29491	1.74768e-05	0.00146043	HOXD3
ENSG00000186895	29.8347	-5.67663	1.02854	-5.51912	3.40694e-08	6.31283e-06	FGF3
ENSG00000176692	26.4135	-5.49094	0.951798	-5.76901	7.97365e-09	2.09118e-06	FOXC2
ENSG00000182168	334.247	-5.25012	0.693027	-7.57564	3.57363e-14	3.04598e-11	UNC5C
ENSG00000137198	90.0232	-5.24394	0.567958	-9.23297	2.63229e-20	4.48727e-17	GMPR
ENSG00000165816	432.04	-5.2076	1.10896	-4.69594	2.65378e-06	0.000301593	VWA2
ENSG00000121966	259.789	-5.08986	1.11701	-4.55668	5.19687e-06	0.000543479	CXCR4
ENSG00000271474	9.83578	-5.07374	1.27602	-3.97621	7.00229e-05	0.00437245	RP11-710C12.1
ENSG00000120457	18.7382	-4.98955	1.13103	-4.4115	1.02656e-05	0.000945934	KCNJ5
ENSG00000181195	12.8164	-4.98675	1.30365	-3.82522	0.000130655	0.00723141	PENK
ENSG00000100678	140.786	-4.96995	0.610892	-8.13557	4.10012e-16	4.65965e-13	SLC8A3
ENSG00000160179	121.083	-4.95412	0.895579	-5.53175	3.17047e-08	5.94107e-06	ABCG1
ENSG00000145681	70.5652	-4.94478	0.785517	-6.29494	3.07516e-10	1.31055e-07	HAPLN1
ENSG00000149922	587.293	-4.9267	0.381196	-12.9243	3.28156e-38	1.39852e-34	TBX6
ENSG00000172296	29.1131	-4.77687	1.04937	-4.55213	5.31067e-06	0.000548673	SPTLC3
ENSG00000185742	78.6583	-4.77507	1.2133	-3.93561	8.29854e-05	0.00507044	C11orf87
ENSG00000224189	188.203	-4.70093	0.869221	-5.40821	6.36576e-08	1.09613e-05	HAGLR
ENSG00000054598	197.852	-4.41159	0.993335	-4.44119	8.94648e-06	0.000852014	FOXC1
ENSG00000142609	13.4315	-4.39469	1.19074	-3.69072	0.00022362	0.0108606	CFAP74
ENSG00000179111	673.936	-4.38883	0.866489	-5.06507	4.0825e-07	5.70446e-05	HES7
ENSG00000164929	119.774	-4.18995	1.12304	-3.73089	0.000190801	0.00966897	BAALC
ENSG00000274330	13.313	-4.14689	1.07957	-3.84123	0.000122417	0.00690388	RP11-486O13.5
ENSG00000169297	50.4117	-4.12482	0.725228	-5.68761	1.28828e-08	3.09315e-06	NR0B1
ENSG00000019549	410.54	-4.1118	0.331852	-12.3905	2.94378e-35	1.00365e-31	SNAI2
ENSG00000135960	237.34	-4.0761	1.06491	-3.82766	0.000129368	0.00718348	EDAR
ENSG00000105855	242.957	-3.9938	0.340508	-11.7289	9.05827e-32	1.9302e-28	ITGB8
ENSG00000179148	13.7904	-3.89	1.20511	-3.22792	0.00124692	0.0362736	ALOXE3
ENSG00000198729	180.35	-3.88432	0.795339	-4.88385	1.04032e-06	0.000130399	PPP1R14C
ENSG00000198719	818.253	-3.6812	0.629507	-5.84776	4.98246e-09	1.46441e-06	DLL1
ENSG00000163235	173.781	-3.63859	0.523687	-6.94802	3.70438e-12	2.25531e-09	TGFA
ENSG00000102362	46.7609	-3.63534	0.91057	-3.99238	6.54139e-05	0.00413004	SYTL4
ENSG00000078328	86.0048	-3.56563	0.549185	-6.4926	8.43701e-11	4.49456e-08	RBFOX1
ENSG00000103241	8.97851	-3.56471	1.06906	-3.33444	0.000854709	0.0269947	FOXF1
ENSG00000248265	145.251	-3.51267	0.921857	-3.81043	0.000138727	0.00757976	FLJ12825
ENSG00000118777	56.6301	-3.50887	0.805545	-4.35589	1.32527e-05	0.00118536	ABCG2
ENSG00000165194	742.785	-3.4564	0.737821	-4.6846	2.80509e-06	0.000314594	PCDH19
ENSG00000185760	31.2646	-3.42959	0.834742	-4.10856	3.98131e-05	0.00280452	KCNQ5
ENSG00000090932	1470.27	-3.41991	0.531521	-6.4342	1.24129e-10	6.38945e-08	DLL3
ENSG00000103723	243.795	-3.39555	0.255999	-13.2639	3.74872e-40	2.13015e-36	AP3B2
ENSG00000162849	528.658	-3.38554	0.62839	-5.38764	7.13896e-08	1.20493e-05	KIF26B
ENSG00000128918	32.6394	-3.38407	0.527469	-6.41567	1.40201e-10	6.63893e-08	ALDH1A2
ENSG00000263155	33.5878	-3.35297	0.508838	-6.58945	4.41456e-11	2.48493e-08	MYZAP
ENSG00000170369	23.4092	-3.32905	0.880866	-3.77929	0.000157274	0.00835216	CST2
ENSG00000007129	7.63184	-3.3078	0.919983	-3.59551	0.000323762	0.0139373	CEACAM21
ENSG00000254369	1072.29	-3.30651	0.884752	-3.73722	0.000186069	0.00959368	HOXA-AS3
ENSG00000125931	474.945	-3.30351	0.920568	-3.58856	0.00033251	0.0141708	CITED1
ENSG00000197406	25.8174	-3.28446	0.576537	-5.69687	1.22026e-08	2.97167e-06	DIO3
ENSG00000058866	28.7664	-3.26342	0.675786	-4.82908	1.37168e-06	0.000167022	DGKG
ENSG00000154342	790.938	-3.25618	0.594053	-5.4813	4.2222e-08	7.57641e-06	WNT3A
ENSG00000134817	5698.78	-3.2429	0.689715	-4.7018	2.57881e-06	0.00029504	APLNR
ENSG00000187122	185.403	-3.23209	0.487934	-6.62403	3.49544e-11	2.05471e-08	SLIT1
ENSG00000076356	1185.55	-3.21712	0.645591	-4.98322	6.25338e-07	8.20011e-05	PLXNA2
ENSG00000260266	238.925	-3.19604	0.320152	-9.9829	1.81092e-23	3.43008e-20	CTD-2311M21.2
ENSG00000231918	21.7483	-3.14187	0.603916	-5.20249	1.96641e-07	2.94047e-05	AC007682.1
ENSG00000183023	130.812	-3.12931	0.852994	-3.66862	0.000243868	0.0115478	SLC8A1
ENSG00000166106	256.236	-3.11546	0.262956	-11.8478	2.20846e-32	5.37824e-29	ADAMTS15
ENSG00000140323	35.5639	-3.057	0.706766	-4.32533	1.523e-05	0.0013179	DISP2
ENSG00000143340	49.9333	-3.05633	0.509177	-6.0025	1.94303e-09	6.49467e-07	FAM163A
ENSG00000140368	24.8678	-3.0373	0.825023	-3.68148	0.000231887	0.0110921	PSTPIP1
ENSG00000145824	27.6404	-3.03425	0.719248	-4.21864	2.45777e-05	0.00193971	CXCL14
ENSG00000176928	79.3208	-3.02988	0.370291	-8.18242	2.7819e-16	3.38736e-13	GCNT4
ENSG00000183454	361.425	-3.01919	0.18326	-16.4749	5.55969e-61	9.47761e-57	GRIN2A
ENSG00000135363	35.4108	-3.01213	0.697116	-4.32085	1.55428e-05	0.00133817	LMO2
ENSG00000107831	245.132	-2.94278	0.946956	-3.10762	0.001886	0.0493107	FGF8
ENSG00000185614	33.4373	-2.88776	0.760928	-3.79504	0.000147617	0.00796338	FAM212A
ENSG00000114251	1072.22	-2.87046	0.647535	-4.4329	9.2976e-06	0.00087567	WNT5A
ENSG00000148488	22.542	-2.8434	0.711142	-3.99835	6.37849e-05	0.00405725	ST8SIA6
ENSG00000176769	340.35	-2.83995	0.894501	-3.1749	0.00149888	0.0420946	TCERG1L
ENSG00000258498	20.2838	-2.7788	0.822399	-3.3789	0.000727772	0.0244701	DIO3OS
ENSG00000145832	15.7982	-2.76938	0.881586	-3.14136	0.00168163	0.0457004	SLC25A48
ENSG00000188290	90.9164	-2.75009	0.550105	-4.99921	5.75653e-07	7.6071e-05	HES4
ENSG00000162989	15.4626	-2.73747	0.822813	-3.32696	0.000877987	0.0274921	KCNJ3
ENSG00000244586	17.8183	-2.65701	0.714915	-3.71655	0.000201964	0.0100669	WNT5A-AS1
ENSG00000168079	10.2768	-2.64088	0.847267	-3.11694	0.00182741	0.048454	SCARA5
ENSG00000204262	949.591	-2.60593	0.745174	-3.49708	0.000470382	0.0182241	COL5A2
ENSG00000172789	101.586	-2.56935	0.598907	-4.29007	1.78615e-05	0.00147808	HOXC5
ENSG00000188828	38.7705	-2.55866	0.487994	-5.24322	1.57796e-07	2.42338e-05	GLRA4
ENSG00000101327	177.522	-2.50799	0.806724	-3.10886	0.00187808	0.0493107	PDYN
ENSG00000262655	1062.83	-2.50478	0.274144	-9.13673	6.43665e-20	9.97505e-17	SPON1
ENSG00000158815	1990.77	-2.50205	0.568436	-4.40164	1.07435e-05	0.000979385	FGF17
ENSG00000170484	24.1505	-2.4999	0.733705	-3.40723	0.000656263	0.0228313	KRT74
ENSG00000006606	21.6793	-2.49909	0.603949	-4.13792	3.50471e-05	0.00257521	CCL26
ENSG00000102678	47.6243	-2.49586	0.795364	-3.138	0.00170102	0.0458614	FGF9
ENSG00000162733	68.0301	-2.47787	0.560921	-4.4175	9.98503e-06	0.000925081	DDR2
ENSG00000168675	23.0509	-2.46479	0.768598	-3.20686	0.00134191	0.0384463	LDLRAD4
ENSG00000198216	70.7148	-2.44923	0.674574	-3.63078	0.000282562	0.0126426	CACNA1E
ENSG00000134853	164.306	-2.42211	0.447426	-5.41342	6.18316e-08	1.07555e-05	PDGFRA
ENSG00000106484	8110.57	-2.41836	0.692333	-3.49306	0.000477526	0.018318	MEST
ENSG00000140937	1747.65	-2.41173	0.382861	-6.29923	2.99135e-10	1.30753e-07	CDH11
ENSG00000071205	94.1014	-2.40597	0.653614	-3.68103	0.000232292	0.0110921	ARHGAP10
ENSG00000164741	432.933	-2.39854	0.385093	-6.22847	4.70998e-10	1.91169e-07	DLC1
ENSG00000266094	30.3512	-2.35664	0.67638	-3.48419	0.000493633	0.0187145	RASSF5
ENSG00000138119	491.036	-2.34037	0.307578	-7.60903	2.76163e-14	2.47776e-11	MYOF
ENSG00000135063	107.125	-2.33015	0.512687	-4.54498	5.49414e-06	0.00056083	FAM189A2
ENSG00000105996	67.8603	-2.32141	0.404233	-5.74275	9.31512e-09	2.37007e-06	HOXA2
ENSG00000070731	20.2989	-2.23663	0.61795	-3.61943	0.000295254	0.0131415	ST6GALNAC2
ENSG00000091986	176.983	-2.1838	0.518199	-4.21421	2.50649e-05	0.00195106	CCDC80
ENSG00000120088	34.2248	-2.1616	0.56326	-3.83765	0.000124216	0.00694265	CRHR1
ENSG00000170961	528.665	-2.13513	0.381633	-5.59472	2.20977e-08	4.73267e-06	HAS2
ENSG00000080573	40.4245	-2.11735	0.634022	-3.33955	0.000839149	0.0266387	COL5A3
ENSG00000243004	67.2811	-2.10342	0.445166	-4.72502	2.3009e-06	0.000266826	AC005062.2
ENSG00000138650	161.725	-2.09802	0.374672	-5.59963	2.14814e-08	4.69478e-06	PCDH10
ENSG00000135362	122.861	-2.0882	0.468335	-4.45877	8.24319e-06	0.000789447	PRR5L
ENSG00000020633	28.2892	-2.07006	0.648411	-3.19251	0.0014104	0.0400291	RUNX3
ENSG00000125845	134.417	-2.04738	0.452983	-4.51977	6.19071e-06	0.000617152	BMP2
ENSG00000174640	311.169	-2.01615	0.333813	-6.03978	1.54327e-09	5.36902e-07	SLCO2A1
ENSG00000009694	208.731	-2.01313	0.519062	-3.8784	0.000105145	0.00611567	TENM1
ENSG00000163132	831.022	-2.01305	0.367226	-5.48179	4.21052e-08	7.57641e-06	MSX1
ENSG00000163378	1066.1	-1.96809	0.545449	-3.60819	0.00030834	0.0135123	EOGT
ENSG00000180616	86.2316	-1.94142	0.455914	-4.2583	2.05986e-05	0.00167212	SSTR2
ENSG00000183779	738.333	-1.93583	0.349951	-5.5317	3.17145e-08	5.94107e-06	ZNF703
ENSG00000116106	1377.5	-1.92673	0.299638	-6.4302	1.27437e-10	6.38945e-08	EPHA4
ENSG00000100346	108.553	-1.92417	0.529815	-3.63178	0.000281477	0.0126272	CACNA1I
ENSG00000260834	492.991	-1.83769	0.331812	-5.53834	3.05345e-08	5.84855e-06	RP11-256I9.2
ENSG00000134138	85.8534	-1.83117	0.490235	-3.73528	0.000187503	0.0095987	MEIS2
ENSG00000156006	43.8213	-1.81326	0.439249	-4.1281	3.65771e-05	0.00266465	NAT2
ENSG00000203867	99.9561	-1.80955	0.385955	-4.68851	2.75206e-06	0.000310691	RBM20
ENSG00000265401	124.459	-1.80854	0.466093	-3.88021	0.000104365	0.00611381	RP11-138I1.4
ENSG00000175785	140.894	-1.80853	0.310494	-5.8247	5.72162e-09	1.60338e-06	PRIMA1
ENSG00000140470	60.9853	-1.8052	0.512787	-3.52036	0.00043096	0.0171649	ADAMTS17
ENSG00000146592	31.0085	-1.79146	0.515707	-3.4738	0.000513138	0.0192461	CREB5
ENSG00000122986	161.287	-1.75314	0.367241	-4.7738	1.80786e-06	0.000212542	HVCN1
ENSG00000184347	259.273	-1.75192	0.285894	-6.12786	8.90712e-10	3.30086e-07	SLIT3
ENSG00000087128	29.462	-1.75185	0.506288	-3.46018	0.000539824	0.0199618	TMPRSS11E
ENSG00000178233	127.002	-1.74008	0.538923	-3.22881	0.00124306	0.036223	TMEM151B
ENSG00000145632	98.1956	-1.69624	0.539502	-3.14408	0.00166609	0.0454429	PLK2
ENSG00000086570	61.5961	-1.69477	0.419674	-4.03831	5.3837e-05	0.00351632	FAT2
ENSG00000124216	233.511	-1.69013	0.335742	-5.03403	4.80286e-07	6.4468e-05	SNAI1
ENSG00000113361	319.469	-1.67867	0.28039	-5.98691	2.13867e-09	7.01115e-07	CDH6
ENSG00000175040	315.903	-1.66723	0.239541	-6.96011	3.40009e-12	2.14672e-09	CHST2
ENSG00000131174	1008.37	-1.64976	0.215692	-7.64869	2.03037e-14	1.92287e-11	COX7B
ENSG00000143512	207.602	-1.64777	0.380896	-4.32605	1.51808e-05	0.0013179	HHIPL2
ENSG00000135919	1949.4	-1.64099	0.22202	-7.39121	1.45501e-13	1.12744e-10	SERPINE2
ENSG00000184470	92.2335	-1.63914	0.501314	-3.26968	0.00107668	0.0324249	TXNRD2
ENSG00000165300	1058.44	-1.63161	0.135825	-12.0126	3.05062e-33	8.66731e-30	SLITRK5
ENSG00000101443	265.143	-1.62811	0.4518	-3.60361	0.000313827	0.0136584	WFDC2
ENSG00000250742	226.005	-1.62257	0.403548	-4.02078	5.80063e-05	0.00374558	RP11-834C11.4
ENSG00000260027	78.7402	-1.61842	0.483665	-3.34615	0.000819418	0.02633	HOXB7
ENSG00000171617	1942.05	-1.60493	0.298046	-5.38483	7.25119e-08	1.21187e-05	ENC1
ENSG00000105997	457.361	-1.57633	0.38321	-4.11347	3.89749e-05	0.00275687	HOXA3
ENSG00000150995	464.28	-1.57482	0.449611	-3.50263	0.00046068	0.0179594	ITPR1
ENSG00000165156	138.843	-1.56154	0.363715	-4.29332	1.76022e-05	0.00146373	ZHX1
ENSG00000158270	110.195	-1.53862	0.457127	-3.36586	0.000763056	0.0252579	COLEC12
ENSG00000145284	258.434	-1.53353	0.424562	-3.61202	0.000303816	0.0133724	SCD5
ENSG00000197977	119.12	-1.51669	0.34823	-4.35542	1.32811e-05	0.00118536	ELOVL2
ENSG00000175764	27.02	-1.50228	0.447751	-3.35516	0.000793179	0.025902	TTLL11
ENSG00000028137	156.879	-1.50065	0.423967	-3.53954	0.000400818	0.0163073	TNFRSF1B
ENSG00000103056	197.301	-1.48769	0.351442	-4.23309	2.30503e-05	0.00183616	SMPD3
ENSG00000100095	153.501	-1.48643	0.47746	-3.11319	0.00185074	0.0487629	SEZ6L
ENSG00000007384	507.738	-1.48246	0.301786	-4.9123	9.00135e-07	0.000114512	RHBDF1
ENSG00000196549	796.991	-1.46965	0.262399	-5.60082	2.13337e-08	4.69478e-06	MME
ENSG00000130052	542.276	-1.46438	0.390478	-3.75022	0.000176682	0.00921072	STARD8
ENSG00000188488	91.6348	-1.45345	0.408577	-3.55734	0.000374633	0.0155265	SERPINA5
ENSG00000171843	1165.61	-1.43536	0.374176	-3.83606	0.000125025	0.00696506	MLLT3
ENSG00000134762	122.282	-1.42961	0.251982	-5.67344	1.39955e-08	3.31364e-06	DSC3
ENSG00000111077	334.163	-1.42846	0.294781	-4.84583	1.26085e-06	0.00015463	TNS2
ENSG00000196368	642.086	-1.42544	0.195353	-7.29673	2.94848e-13	2.01051e-10	NUDT11
ENSG00000150687	190.782	-1.42113	0.374207	-3.7977	0.000146042	0.00792861	PRSS23
ENSG00000134508	492.755	-1.41444	0.255234	-5.54176	2.99448e-08	5.80407e-06	CABLES1
ENSG00000140511	660.001	-1.41202	0.252424	-5.59384	2.221e-08	4.73267e-06	HAPLN3
ENSG00000149591	2212.97	-1.40604	0.386393	-3.63889	0.000273821	0.0123487	TAGLN
ENSG00000181234	1452.99	-1.3925	0.348062	-4.00073	6.31473e-05	0.00404482	TMEM132C
ENSG00000171488	125.091	-1.38376	0.317941	-4.35224	1.34751e-05	0.00119641	LRRC8C
ENSG00000139880	1250.57	-1.38052	0.283601	-4.86784	1.12826e-06	0.000139373	CDH24
ENSG00000123560	1923.31	-1.37738	0.231322	-5.95441	2.61006e-09	8.39503e-07	PLP1
ENSG00000184985	154.156	-1.37576	0.358467	-3.8379	0.000124089	0.00694265	SORCS2
ENSG00000165495	341.371	-1.37147	0.302271	-4.53722	5.70008e-06	0.000574966	PKNOX2
ENSG00000144057	254.976	-1.36096	0.418408	-3.25271	0.0011431	0.0338305	ST6GAL2
ENSG00000136928	32.3159	-1.35569	0.42205	-3.21214	0.00131749	0.0378101	GABBR2
ENSG00000114450	2138.27	-1.34504	0.173591	-7.74832	9.31189e-15	9.92124e-12	GNB4
ENSG00000163909	170.506	-1.33926	0.410822	-3.25995	0.00111434	0.033152	HEYL
ENSG00000234787	646.392	-1.33738	0.253874	-5.26791	1.37982e-07	2.15796e-05	LINC00458
ENSG00000167034	41.9864	-1.3342	0.39418	-3.38474	0.000712464	0.024098	NKX3-1
ENSG00000139832	143.397	-1.30851	0.222494	-5.8811	4.07551e-09	1.26318e-06	RAB20
ENSG00000145365	75.1142	-1.2999	0.336428	-3.86384	0.000111621	0.00638522	TIFA
ENSG00000120075	98.759	-1.29947	0.375887	-3.45707	0.000546082	0.020088	HOXB5
ENSG00000169129	243.676	-1.28357	0.382944	-3.35185	0.000802746	0.0261153	AFAP1L2
ENSG00000124942	805.376	-1.28079	0.375194	-3.41367	0.000640948	0.0224358	AHNAK
ENSG00000107338	252.966	-1.2762	0.286089	-4.46085	8.16342e-06	0.000788249	SHB
ENSG00000175906	357.213	-1.27355	0.264039	-4.82336	1.41157e-06	0.000169457	ARL4D
ENSG00000041982	410.863	-1.27166	0.346439	-3.67067	0.000241917	0.0115194	TNC
ENSG00000169991	479.215	-1.25325	0.253132	-4.95098	7.38422e-07	9.53627e-05	IFFO2
ENSG00000187676	155.329	-1.25087	0.283012	-4.41986	9.87665e-06	0.00092004	B3GALTL
ENSG00000061492	1106	-1.2453	0.341857	-3.64275	0.000269743	0.0122949	WNT8A
ENSG00000106038	703.583	-1.23726	0.298938	-4.13886	3.49041e-05	0.00257521	EVX1
ENSG00000166669	360.364	-1.23154	0.37166	-3.31363	0.000920937	0.0284922	ATF7IP2
ENSG00000242539	95.1906	-1.22088	0.327276	-3.73044	0.000191145	0.00966897	AC007620.3
ENSG00000069974	152.097	-1.21783	0.26348	-4.62209	3.79888e-06	0.000415125	RAB27A
ENSG00000149596	72.9417	-1.21229	0.34297	-3.53469	0.000408248	0.0165306	JPH2
ENSG00000173917	785.086	-1.21035	0.330153	-3.66604	0.00024634	0.0115685	HOXB2
ENSG00000132821	95.6939	-1.20102	0.361812	-3.31945	0.000901957	0.0280067	VSTM2L
ENSG00000075426	125.322	-1.19039	0.350379	-3.39743	0.000680214	0.0234729	FOSL2
ENSG00000133874	520.099	-1.18194	0.230348	-5.1311	2.88048e-07	4.16131e-05	RNF122
ENSG00000164458	1302.05	-1.17802	0.287357	-4.09949	4.14056e-05	0.00288099	T
ENSG00000078596	271.989	-1.17667	0.273186	-4.30723	1.65315e-05	0.00140205	ITM2A
ENSG00000183463	449.952	-1.17583	0.262344	-4.482	7.39484e-06	0.00072867	URAD
ENSG00000173705	182.132	-1.17107	0.372233	-3.14608	0.00165476	0.0452191	SUSD5
ENSG00000134202	115.587	-1.16654	0.328295	-3.55334	0.000380372	0.0157002	GSTM3
ENSG00000128045	759.862	-1.16118	0.16403	-7.07904	1.45158e-12	9.51737e-10	RASL11B
ENSG00000164574	521.24	-1.14278	0.275477	-4.14839	3.34826e-05	0.00249248	GALNT10
ENSG00000121281	157.195	-1.14045	0.285103	-4.00011	6.33127e-05	0.00404482	ADCY7
ENSG00000163485	76.6366	-1.1337	0.327316	-3.46362	0.000532964	0.019794	ADORA1
ENSG00000139433	268.872	-1.13228	0.248844	-4.55016	5.3604e-06	0.000550474	GLTP
ENSG00000120094	1610.24	-1.12786	0.248552	-4.53773	5.68622e-06	0.000574966	HOXB1
ENSG00000126822	1908.96	-1.12771	0.310384	-3.63327	0.000279851	0.0125874	PLEKHG3
ENSG00000198756	191.299	-1.1225	0.225979	-4.9673	6.7892e-07	8.83477e-05	COLGALT2
ENSG00000170100	524.743	-1.12233	0.32753	-3.42666	0.000611062	0.0217016	ZNF778
ENSG00000198513	81.2346	-1.12155	0.345957	-3.24186	0.0011875	0.0349023	ATL1
ENSG00000148400	2146.97	-1.11499	0.334414	-3.33415	0.000855597	0.0269947	NOTCH1
ENSG00000170915	563.544	-1.11242	0.190099	-5.8518	4.86291e-09	1.45435e-06	PAQR8
ENSG00000129474	1335.5	-1.11023	0.309563	-3.58644	0.000335222	0.0142507	AJUBA
ENSG00000163785	955.268	-1.09983	0.14813	-7.42478	1.12965e-13	9.17004e-11	RYK
ENSG00000175414	379.634	-1.09537	0.338893	-3.23218	0.00122848	0.0358593	ARL10
ENSG00000179094	709.732	-1.08217	0.25328	-4.27261	1.93197e-05	0.00157784	PER1
ENSG00000168243	575.674	-1.08204	0.304824	-3.54974	0.000385619	0.0158125	GNG4
ENSG00000120708	622.12	-1.08123	0.259626	-4.16457	3.11943e-05	0.00233232	TGFBI
ENSG00000158966	4052.62	-1.08069	0.206667	-5.22914	1.70297e-07	2.592e-05	CACHD1
ENSG00000145990	226.69	-1.06836	0.206227	-5.18053	2.21252e-07	3.27972e-05	GFOD1
ENSG00000115963	515.367	-1.06484	0.33979	-3.13382	0.00172548	0.0463218	RND3
ENSG00000144152	141.851	-1.06419	0.304691	-3.49269	0.000478179	0.018318	FBLN7
ENSG00000138795	1869.75	-1.06164	0.307021	-3.45788	0.000544443	0.020088	LEF1
ENSG00000087303	609.397	-1.05726	0.281393	-3.75725	0.000171788	0.00906649	NID2
ENSG00000177511	391.563	-1.03909	0.247905	-4.19147	2.77158e-05	0.00209987	ST8SIA3
ENSG00000168672	1592.95	-1.0352	0.23855	-4.33958	1.42758e-05	0.00126093	FAM84B
ENSG00000127540	1260.9	-1.02923	0.160413	-6.41616	1.39753e-10	6.63893e-08	UQCR11
ENSG00000152076	207.264	-1.02883	0.316876	-3.24677	0.00116722	0.0344845	CCDC74B
ENSG00000139289	1009.44	-1.0273	0.2737	-3.75337	0.000174471	0.0091514	PHLDA1
ENSG00000099204	3160.6	-1.0219	0.15976	-6.39647	1.59007e-10	7.13313e-08	ABLIM1
ENSG00000151388	403.715	-1.00503	0.225194	-4.46296	8.08365e-06	0.00078744	ADAMTS12
ENSG00000182158	767.014	-1.00101	0.237458	-4.21553	2.49198e-05	0.00194866	CREB3L2
ENSG00000118985	502.669	-0.991414	0.176023	-5.63229	1.77837e-08	4.04212e-06	ELL2
ENSG00000171791	100.968	-0.976868	0.283159	-3.44989	0.000560816	0.0203843	BCL2
ENSG00000158856	176.308	-0.971767	0.302208	-3.21556	0.00130193	0.0376807	DMTN
ENSG00000163029	2287.34	-0.966231	0.174358	-5.54166	2.99618e-08	5.80407e-06	SMC6
ENSG00000142871	750.136	-0.961206	0.291504	-3.29741	0.000975815	0.029758	CYR61
ENSG00000131773	718.397	-0.960882	0.269022	-3.57176	0.000354589	0.0148154	KHDRBS3
ENSG00000189120	905.949	-0.953917	0.262012	-3.64073	0.000271861	0.0123233	SP6
ENSG00000128591	2991.99	-0.949905	0.263018	-3.61156	0.000304363	0.0133724	FLNC
ENSG00000198832	124.787	-0.943579	0.268599	-3.51296	0.00044314	0.017406	SELM
ENSG00000113722	1604.62	-0.943038	0.241891	-3.8986	9.67489e-05	0.00576303	CDX1
ENSG00000105875	263.975	-0.942807	0.254607	-3.70299	0.000213074	0.0105589	WDR91
ENSG00000169439	928.834	-0.938214	0.219203	-4.28012	1.86793e-05	0.00153829	SDC2
ENSG00000130635	1595.27	-0.925785	0.276692	-3.3459	0.000820157	0.02633	COL5A1
ENSG00000110427	135.928	-0.924475	0.289531	-3.193	0.00140801	0.0400291	KIAA1549L
ENSG00000115946	799.576	-0.917352	0.164738	-5.56854	2.5688e-08	5.21313e-06	PNO1
ENSG00000134352	306.466	-0.916571	0.270024	-3.39441	0.000687778	0.0235746	IL6ST
ENSG00000171016	190.387	-0.916274	0.269777	-3.39642	0.000682743	0.0235126	PYGO1
ENSG00000164104	5383.78	-0.914767	0.177301	-5.15941	2.47728e-07	3.60942e-05	HMGB2
ENSG00000187123	245.808	-0.908412	0.276933	-3.28025	0.00103713	0.0313476	LYPD6
ENSG00000085491	698.695	-0.906736	0.243607	-3.72212	0.000197556	0.00993434	SLC25A24
ENSG00000196141	842.927	-0.899643	0.266441	-3.37652	0.000734088	0.0245854	SPATS2L
ENSG00000080819	762.711	-0.8923	0.228612	-3.90311	9.49637e-05	0.00568016	CPOX
ENSG00000090530	916.628	-0.890538	0.276989	-3.21506	0.00130417	0.0376818	P3H2
ENSG00000198947	609.918	-0.874165	0.278603	-3.13767	0.00170295	0.0458614	DMD
ENSG00000204899	886.297	-0.873108	0.149581	-5.83702	5.31429e-09	1.53547e-06	MZT1
ENSG00000198814	177.979	-0.855785	0.233965	-3.65775	0.000254435	0.0117641	GK
ENSG00000102879	201.312	-0.854501	0.20119	-4.24724	2.16423e-05	0.00174027	CORO1A
ENSG00000164978	203.065	-0.842425	0.194316	-4.33532	1.45545e-05	0.00127892	NUDT2
ENSG00000105991	1492	-0.832803	0.149242	-5.58023	2.40199e-08	4.99351e-06	HOXA1
ENSG00000158435	899.655	-0.83244	0.129985	-6.40414	1.51222e-10	6.96726e-08	CNOT11
ENSG00000143367	345.133	-0.831464	0.183505	-4.53102	5.87005e-06	0.000588628	TUFT1
ENSG00000067955	1102.61	-0.826716	0.239696	-3.44903	0.000562612	0.0204061	CBFB
ENSG00000165556	4008.69	-0.822273	0.162602	-5.05698	4.25947e-07	5.85574e-05	CDX2
ENSG00000187867	931.341	-0.821263	0.246345	-3.3338	0.000856698	0.0269947	PALM3
ENSG00000169570	222.196	-0.814077	0.231146	-3.52191	0.00042845	0.0171649	DTWD2
ENSG00000111252	1030.34	-0.810912	0.208267	-3.89361	9.87635e-05	0.00584591	SH2B3
ENSG00000046604	5029.29	-0.802135	0.235824	-3.40141	0.000670385	0.0232278	DSG2
ENSG00000117114	3502.43	-0.800887	0.141248	-5.6701	1.42718e-08	3.33275e-06	ADGRL2
ENSG00000114115	2301.27	-0.799705	0.221694	-3.60724	0.00030947	0.013527	RBP1
ENSG00000164086	471.344	-0.798399	0.19591	-4.07534	4.59479e-05	0.00312061	DUSP7
ENSG00000111186	4592.17	-0.795515	0.228335	-3.48398	0.000494017	0.0187145	WNT5B
ENSG00000065308	974.613	-0.788663	0.22425	-3.5169	0.000436626	0.0172412	TRAM2
ENSG00000071539	792.982	-0.786603	0.235183	-3.34464	0.000823892	0.0263506	TRIP13
ENSG00000181788	469.647	-0.78351	0.243889	-3.21257	0.00131553	0.0378101	SIAH2
ENSG00000111859	288.922	-0.777503	0.201009	-3.86801	0.000109728	0.0062981	NEDD9
ENSG00000178295	704.907	-0.773262	0.231475	-3.34058	0.000836025	0.0266387	GEN1
ENSG00000101335	2076.66	-0.766127	0.230299	-3.32666	0.000878934	0.0274921	MYL9
ENSG00000184887	221.22	-0.757589	0.222464	-3.40544	0.000660574	0.0229344	BTBD6
ENSG00000114019	2177.06	-0.74999	0.134748	-5.56586	2.60863e-08	5.23168e-06	AMOTL2
ENSG00000152104	1914.8	-0.749145	0.23947	-3.12835	0.00175792	0.0470444	PTPN14
ENSG00000150764	500.017	-0.742459	0.225799	-3.28813	0.00100854	0.0306464	DIXDC1
ENSG00000196730	2026.72	-0.736765	0.161196	-4.57062	4.86276e-06	0.000514879	DAPK1
ENSG00000203760	378.292	-0.729884	0.233669	-3.12358	0.00178663	0.0477376	CENPW
ENSG00000144043	760.792	-0.727639	0.20387	-3.56913	0.000358167	0.0148919	TEX261
ENSG00000060718	656.506	-0.726187	0.228676	-3.17561	0.00149522	0.0420611	COL11A1
ENSG00000172819	1398.27	-0.72185	0.171535	-4.20819	2.57425e-05	0.00199469	RARG
ENSG00000114790	297.322	-0.719478	0.179871	-3.99996	6.33523e-05	0.00404482	ARHGEF26
ENSG00000148120	150.816	-0.717625	0.226437	-3.16921	0.00152853	0.0427863	C9orf3
ENSG00000026025	11516.7	-0.716407	0.206513	-3.46907	0.00052226	0.0194813	VIM
ENSG00000143479	262.085	-0.712148	0.208996	-3.40747	0.00065568	0.0228313	DYRK3
ENSG00000140332	2453.63	-0.711182	0.172553	-4.12152	3.76378e-05	0.00270722	TLE3
ENSG00000145214	358.189	-0.707668	0.221677	-3.19234	0.00141125	0.0400291	DGKQ
ENSG00000047621	255.579	-0.702826	0.212813	-3.30255	0.000958087	0.0295344	C12orf4
ENSG00000091317	1218.42	-0.700161	0.130111	-5.38126	7.39677e-08	1.2242e-05	CMTM6
ENSG00000168807	600.469	-0.677914	0.159661	-4.24595	2.17666e-05	0.00174204	SNTB2
ENSG00000095637	914.151	-0.676409	0.173149	-3.90652	9.3634e-05	0.00562035	SORBS1
ENSG00000182718	3277.38	-0.674283	0.142849	-4.72024	2.35562e-06	0.000271326	ANXA2
ENSG00000153404	581.014	-0.674036	0.18497	-3.64404	0.000268391	0.0122661	PLEKHG4B
ENSG00000115884	1263.01	-0.673687	0.203265	-3.31433	0.000918626	0.0284724	SDC1
ENSG00000188803	294.96	-0.66559	0.181535	-3.66645	0.00024594	0.0115685	SHISA6
ENSG00000166900	1027.59	-0.654156	0.195399	-3.3478	0.00081455	0.0262489	STX3
ENSG00000181467	902.299	-0.652703	0.195204	-3.34369	0.000826721	0.0263916	RAP2B
ENSG00000183580	406.045	-0.648495	0.205238	-3.15972	0.00157922	0.0437026	FBXL7
ENSG00000189319	1209.8	-0.64693	0.206699	-3.12981	0.00174917	0.0468839	FAM53B
ENSG00000130559	1701.35	-0.643024	0.172073	-3.73693	0.00018628	0.00959368	CAMSAP1
ENSG00000119185	355.665	-0.63288	0.175101	-3.61437	0.000301074	0.013331	ITGB1BP1
ENSG00000175348	212.008	-0.630496	0.179197	-3.51846	0.000434059	0.0172079	TMEM9B
ENSG00000186260	642.158	-0.621854	0.197665	-3.14599	0.00165523	0.0452191	MKL2
ENSG00000164651	573.348	-0.621514	0.19953	-3.1149	0.00184009	0.0486327	SP8
ENSG00000168646	2377.52	-0.612181	0.139632	-4.38426	1.16382e-05	0.00104972	AXIN2
ENSG00000089159	1838.87	-0.601783	0.167004	-3.6034	0.000314078	0.0136584	PXN
ENSG00000133056	895.048	-0.591635	0.169921	-3.48182	0.000498022	0.0188121	PIK3C2B
ENSG00000158169	513.315	-0.591381	0.151927	-3.89253	9.92033e-05	0.00585162	FANCC
ENSG00000131016	3517.61	-0.58864	0.167978	-3.50426	0.000457876	0.0179023	AKAP12
ENSG00000162073	717.341	-0.582049	0.182002	-3.19803	0.00138369	0.0395104	PAQR4
ENSG00000103449	6078.46	-0.581618	0.159049	-3.65686	0.000255323	0.0117641	SALL1
ENSG00000099385	636.938	-0.58022	0.173772	-3.33897	0.000840908	0.0266449	BCL7C
ENSG00000115561	721.644	-0.577991	0.161296	-3.58342	0.000339122	0.0143473	CHMP3
ENSG00000168246	1136.68	-0.574156	0.180396	-3.18275	0.00145884	0.0411056	UBTD2
ENSG00000172175	817.339	-0.56986	0.143195	-3.9796	6.90326e-05	0.00434243	MALT1
ENSG00000143320	9218.78	-0.565905	0.167985	-3.36879	0.000754989	0.0250883	CRABP2
ENSG00000144580	1698.8	-0.564824	0.166372	-3.39495	0.000686416	0.0235746	RQCD1
ENSG00000107263	1986.06	-0.56189	0.150395	-3.73611	0.000186891	0.00959619	RAPGEF1
ENSG00000166197	4582.59	-0.559981	0.110211	-5.08101	3.75425e-07	5.28915e-05	NOLC1
ENSG00000198176	2155.21	-0.557318	0.155075	-3.59385	0.000325824	0.0139556	TFDP1
ENSG00000173848	1994.95	-0.55123	0.136095	-4.05035	5.1142e-05	0.00337914	NET1
ENSG00000118007	880.359	-0.547575	0.167876	-3.26178	0.00110714	0.0329956	STAG1
ENSG00000129219	925.433	-0.546394	0.132159	-4.13438	3.55911e-05	0.00260395	PLD2
ENSG00000166265	904.739	-0.541282	0.171332	-3.15925	0.00158177	0.0437026	CYYR1
ENSG00000166450	6901.74	-0.526352	0.122548	-4.29508	1.7463e-05	0.00146043	PRTG
ENSG00000213722	2070.12	-0.515919	0.143273	-3.60096	0.000317043	0.0137174	DDAH2
ENSG00000103653	1455.55	-0.510704	0.150792	-3.38681	0.00070711	0.0240557	CSK
ENSG00000182287	4162.89	-0.508993	0.154195	-3.30096	0.000963541	0.0296489	AP1S2
ENSG00000168077	720.289	-0.500856	0.157872	-3.17254	0.00151112	0.0423685	SCARA3
ENSG00000090432	588.057	-0.500505	0.136561	-3.66507	0.000247269	0.0115802	MUL1
ENSG00000140564	985.869	0.500918	0.156984	3.19088	0.00141838	0.0401647	FURIN
ENSG00000166165	4181.25	0.505073	0.149923	3.36889	0.000754723	0.0250883	CKB
ENSG00000112576	686.894	0.505996	0.145775	3.47109	0.00051836	0.0193782	CCND3
ENSG00000145916	1303.85	0.50998	0.128514	3.96828	7.23922e-05	0.00447127	RMND5B
ENSG00000130158	858.428	0.514675	0.15261	3.37248	0.000744949	0.0249003	DOCK6
ENSG00000128739	9207.12	0.520937	0.131076	3.97432	7.05807e-05	0.0043912	SNRPN
ENSG00000165801	1660.48	0.524995	0.139378	3.76671	0.000165415	0.00875724	ARHGEF40
ENSG00000087245	5427.85	0.525357	0.160054	3.28238	0.00102935	0.0311674	MMP2
ENSG00000145555	3896.29	0.532745	0.144144	3.69591	0.000219096	0.0107625	MYO10
ENSG00000126603	456.496	0.534217	0.157991	3.38131	0.000721411	0.0243523	GLIS2
ENSG00000272398	19795.6	0.548269	0.155735	3.52052	0.0004307	0.0171649	CD24
ENSG00000149212	1439.33	0.571242	0.128849	4.43342	9.27501e-06	0.00087567	SESN3
ENSG00000008083	4250.18	0.573047	0.13897	4.12354	3.73096e-05	0.00270345	JARID2
ENSG00000082397	701.862	0.581101	0.174762	3.3251	0.000883855	0.0275449	EPB41L3
ENSG00000196935	235.755	0.583462	0.176212	3.31115	0.000929148	0.0286942	SRGAP1
ENSG00000076944	870.687	0.596769	0.182947	3.26198	0.00110639	0.0329956	STXBP2
ENSG00000157214	272.92	0.59765	0.181167	3.29888	0.0009707	0.0297083	STEAP2
ENSG00000145911	1695.14	0.59796	0.190526	3.13846	0.00169836	0.0458614	N4BP3
ENSG00000080839	399.526	0.604395	0.149923	4.03138	5.545e-05	0.00359413	RBL1
ENSG00000142408	292.18	0.612306	0.174113	3.51672	0.00043692	0.0172412	CACNG8
ENSG00000105767	464.919	0.615243	0.174205	3.53172	0.00041287	0.0166388	CADM4
ENSG00000102996	1368.39	0.615601	0.19131	3.21782	0.0012917	0.0374483	MMP15
ENSG00000254470	263.268	0.617195	0.198966	3.10201	0.00192212	0.0499488	AP5B1
ENSG00000110888	869.188	0.618934	0.151167	4.09437	4.23317e-05	0.00292157	CAPRIN2
ENSG00000142173	2210.95	0.622797	0.197024	3.16102	0.00157215	0.043649	COL6A2
ENSG00000182568	444.259	0.62284	0.197328	3.15637	0.00159744	0.0440639	SATB1
ENSG00000163625	931.887	0.630462	0.187356	3.36506	0.00076528	0.0252764	WDFY3
ENSG00000132003	581.942	0.630673	0.200288	3.14882	0.0016393	0.0449987	ZSWIM4
ENSG00000174373	513.593	0.631631	0.184617	3.42131	0.000623194	0.021995	RALGAPA1
ENSG00000177426	1939.67	0.64262	0.169648	3.78796	0.000151892	0.00814244	TGIF1
ENSG00000104177	1903.94	0.649252	0.158511	4.09595	4.20434e-05	0.00291347	MYEF2
ENSG00000167178	443.708	0.650134	0.176048	3.69294	0.000221672	0.0108003	ISLR2
ENSG00000152601	256.549	0.651081	0.207504	3.13768	0.0017029	0.0458614	MBNL1
ENSG00000110002	501.235	0.651464	0.158014	4.12282	3.74268e-05	0.00270345	VWA5A
ENSG00000116717	609.101	0.666533	0.193612	3.44262	0.00057611	0.0208071	GADD45A
ENSG00000120756	436.991	0.668602	0.198642	3.36586	0.000763047	0.0252579	PLS1
ENSG00000189067	1732.72	0.685417	0.193403	3.54399	0.000394123	0.0160732	LITAF
ENSG00000148737	581.396	0.717466	0.202128	3.54956	0.000385875	0.0158125	TCF7L2
ENSG00000205269	322.489	0.726838	0.218528	3.32607	0.000880801	0.0275	TMEM170B
ENSG00000167925	253.924	0.729027	0.234084	3.11438	0.00184334	0.0486431	GHDC
ENSG00000148175	312.969	0.736561	0.215162	3.42328	0.000618705	0.0218819	STOM
ENSG00000141232	405.422	0.738651	0.230601	3.20316	0.00135927	0.0388783	TOB1
ENSG00000175497	127.926	0.745651	0.230448	3.23566	0.00121361	0.0354863	DPP10
ENSG00000105737	1095.29	0.746393	0.204212	3.65499	0.000257194	0.0118178	GRIK5
ENSG00000221968	438.371	0.762616	0.225685	3.37912	0.000727183	0.0244701	FADS3
ENSG00000197852	263.403	0.765226	0.202132	3.78577	0.000153231	0.00818077	FAM212B
ENSG00000180530	905.364	0.76743	0.220938	3.47351	0.000513696	0.0192461	NRIP1
ENSG00000088970	323.302	0.769946	0.246748	3.12038	0.00180619	0.0481365	KIZ
ENSG00000130294	8740.7	0.772771	0.244151	3.16514	0.00155011	0.0432482	KIF1A
ENSG00000177854	152.766	0.778001	0.250304	3.10822	0.00188217	0.0493107	TMEM187
ENSG00000177519	353.996	0.781248	0.185066	4.22146	2.42721e-05	0.0019245	RPRM
ENSG00000129009	481.422	0.782163	0.24004	3.25847	0.00112016	0.0332673	ISLR
ENSG00000105926	1567.55	0.784277	0.209262	3.74782	0.000178376	0.00927067	MPP6
ENSG00000263513	279.584	0.785107	0.232843	3.37183	0.0007467	0.02491	FAM72C
ENSG00000184381	363.71	0.788946	0.192746	4.09319	4.25488e-05	0.00292471	PLA2G6
ENSG00000157617	353.776	0.800641	0.240288	3.332	0.000862237	0.0270761	C2CD2
ENSG00000144749	2862.04	0.802066	0.216182	3.71014	0.000207142	0.0102949	LRIG1
ENSG00000091972	696.694	0.807427	0.143608	5.62242	1.88297e-08	4.22355e-06	CD200
ENSG00000101871	1146.31	0.809333	0.184539	4.38569	1.15618e-05	0.00104837	MID1
ENSG00000157353	244.019	0.810144	0.260961	3.10447	0.00190623	0.0497633	FUK
ENSG00000168505	1134.16	0.81204	0.161204	5.03733	4.72068e-07	6.38678e-05	GBX2
ENSG00000121570	7917.39	0.819816	0.211508	3.87605	0.000106166	0.00613495	DPPA4
ENSG00000139737	296.079	0.84086	0.244757	3.43549	0.000591473	0.0211824	SLAIN1
ENSG00000184916	252.022	0.844555	0.217578	3.88163	0.00010376	0.0060993	JAG2
ENSG00000158528	262.008	0.851187	0.233726	3.64182	0.000270717	0.0123064	PPP1R9A
ENSG00000170561	734.956	0.851833	0.208429	4.08692	4.37138e-05	0.00299273	IRX2
ENSG00000103460	197.417	0.852276	0.230622	3.69556	0.000219406	0.0107625	TOX3
ENSG00000106278	7826.05	0.855839	0.252159	3.39404	0.000688693	0.0235746	PTPRZ1
ENSG00000135709	322.389	0.871746	0.226635	3.84647	0.000119831	0.00679763	KIAA0513
ENSG00000152818	1574.15	0.874069	0.195825	4.46352	8.06247e-06	0.00078744	UTRN
ENSG00000197070	343.853	0.874904	0.192059	4.5554	5.22851e-06	0.000543479	ARRDC1
ENSG00000132359	823.912	0.880281	0.279274	3.15204	0.00162135	0.044588	RAP1GAP2
ENSG00000149269	2627.65	0.885021	0.143196	6.18047	6.3911e-10	2.47611e-07	PAK1
ENSG00000176531	151.379	0.886637	0.24239	3.65789	0.000254296	0.0117641	PHLDB3
ENSG00000145864	158.941	0.90987	0.269401	3.37739	0.000731783	0.0245565	GABRB2
ENSG00000001561	159.29	0.913742	0.251021	3.6401	0.000272533	0.0123233	ENPP4
ENSG00000186493	160.51	0.923295	0.296726	3.11161	0.0018607	0.0489496	C5orf38
ENSG00000068078	620.759	0.926227	0.276441	3.35054	0.000806532	0.0261383	FGFR3
ENSG00000129757	358.156	0.928816	0.192468	4.82581	1.39436e-06	0.000168579	CDKN1C
ENSG00000167191	3084.75	0.930784	0.266423	3.49363	0.000476494	0.018318	GPRC5B
ENSG00000160796	1063.75	0.932439	0.162817	5.72692	1.02269e-08	2.5638e-06	NBEAL2
ENSG00000112367	399.611	0.936322	0.265598	3.52534	0.000422944	0.0170046	FIG4
ENSG00000186648	118.666	0.937865	0.254743	3.68161	0.000231762	0.0110921	LRRC16B
ENSG00000152061	947.467	0.940801	0.227207	4.14073	3.46208e-05	0.00256601	RABGAP1L
ENSG00000157110	2597.49	0.942353	0.288571	3.26558	0.00109239	0.0327274	RBPMS
ENSG00000273151	357.995	0.943279	0.253518	3.72076	0.000198626	0.00995875	RP11-449P15.2
ENSG00000237945	231.13	0.956542	0.284297	3.36459	0.000766581	0.0252764	LINC00649
ENSG00000189184	1778.16	0.956859	0.240632	3.97645	6.99521e-05	0.00437245	PCDH18
ENSG00000130720	208.177	0.956984	0.306858	3.11866	0.00181677	0.0483158	FIBCD1
ENSG00000115107	252.428	0.961921	0.298219	3.22555	0.00125729	0.0365129	STEAP3
ENSG00000173406	350.8	0.964232	0.159003	6.06422	1.32594e-09	4.70902e-07	DAB1
ENSG00000160190	338.036	0.965321	0.279291	3.45633	0.000547595	0.020088	SLC37A1
ENSG00000124507	176.083	0.965688	0.284674	3.39226	0.000693178	0.0236806	PACSIN1
ENSG00000143126	1211.24	0.967311	0.253503	3.81578	0.000135753	0.0074651	CELSR2
ENSG00000185483	1159.14	0.969183	0.271403	3.57102	0.000355598	0.0148212	ROR1
ENSG00000198113	226.331	0.973364	0.278095	3.50012	0.000465057	0.0180588	TOR4A
ENSG00000130768	187.549	0.982954	0.290013	3.38935	0.000700595	0.0238861	SMPDL3B
ENSG00000172915	554.392	0.987421	0.316796	3.1169	0.00182765	0.048454	NBEA
ENSG00000172318	222.017	0.997958	0.265746	3.75531	0.000173129	0.00910903	B3GALT1
ENSG00000104870	332.246	1.00967	0.292166	3.45581	0.000548644	0.020088	FCGRT
ENSG00000110455	192.931	1.01528	0.313132	3.24235	0.00118549	0.0349023	ACCS
ENSG00000043355	2731.84	1.017	0.241221	4.21605	2.48613e-05	0.00194866	ZIC2
ENSG00000232445	462.093	1.01785	0.282588	3.60191	0.000315891	0.0137023	RP11-132A1.4
ENSG00000130182	2133.76	1.01882	0.310999	3.27595	0.00105307	0.0317729	ZSCAN10
ENSG00000198948	110.48	1.02659	0.294507	3.48579	0.000490678	0.018671	MFAP3L
ENSG00000118507	320.869	1.02945	0.300189	3.42932	0.000605094	0.0215567	AKAP7
ENSG00000146776	502.808	1.034	0.288556	3.58338	0.000339178	0.0143473	ATXN7L1
ENSG00000128294	1025.49	1.03507	0.27202	3.80513	0.000141731	0.00771911	TPST2
ENSG00000172869	730.712	1.03681	0.193478	5.35878	8.37843e-08	1.37334e-05	DMXL1
ENSG00000163520	1227.53	1.03806	0.24063	4.31393	1.60378e-05	0.00136699	FBLN2
ENSG00000006047	519.205	1.05383	0.311253	3.38576	0.000709802	0.0240557	YBX2
ENSG00000018625	6601.43	1.06095	0.252478	4.20216	2.64381e-05	0.00202103	ATP1A2
ENSG00000114861	279.481	1.0697	0.30956	3.45557	0.000549129	0.020088	FOXP1
ENSG00000240563	6019.24	1.0726	0.176568	6.07471	1.24214e-09	4.50526e-07	L1TD1
ENSG00000137266	585.981	1.07679	0.308526	3.4901	0.000482835	0.0184549	SLC22A23
ENSG00000116675	95.4207	1.07885	0.303312	3.5569	0.000375251	0.0155265	DNAJC6
ENSG00000177679	309.163	1.09885	0.352676	3.11575	0.00183476	0.048567	SRRM3
ENSG00000187486	91.2223	1.10526	0.284934	3.87901	0.000104885	0.00611567	KCNJ11
ENSG00000139364	942.12	1.11352	0.276178	4.03189	5.53305e-05	0.00359413	TMEM132B
ENSG00000128610	284.363	1.11824	0.303054	3.6899	0.000224339	0.0108645	FEZF1
ENSG00000120594	719.966	1.11961	0.317993	3.52087	0.000430128	0.0171649	PLXDC2
ENSG00000139800	898.932	1.12678	0.276939	4.0687	4.72765e-05	0.00317292	ZIC5
ENSG00000119669	2413.45	1.12721	0.283812	3.97167	7.13715e-05	0.00442425	IRF2BPL
ENSG00000156453	2873.23	1.12735	0.252752	4.4603	8.18443e-06	0.000788249	PCDH1
ENSG00000178947	294.94	1.14642	0.302311	3.79218	0.000149333	0.00803052	SMIM10L2A
ENSG00000273729	77.1293	1.15196	0.3444	3.34483	0.000823339	0.0263506	RP11-7F17.8
ENSG00000119888	1661.67	1.15516	0.366908	3.14836	0.00164188	0.0449987	EPCAM
ENSG00000125266	795.96	1.16003	0.22032	5.26518	1.40053e-07	2.17044e-05	EFNB2
ENSG00000091129	392.285	1.16142	0.300014	3.87121	0.000108296	0.00623688	NRCAM
ENSG00000068831	293.226	1.17335	0.312788	3.75125	0.000175955	0.00920096	RASGRP2
ENSG00000262001	294.783	1.17356	0.28603	4.10291	4.07982e-05	0.00286209	DLGAP1-AS2
ENSG00000178343	149.792	1.17513	0.288451	4.07393	4.62269e-05	0.0031271	SHISA3
ENSG00000127561	259.057	1.17713	0.356976	3.2975	0.000975485	0.029758	SYNGR3
ENSG00000046889	1258.18	1.18031	0.21674	5.44573	5.15928e-08	9.06703e-06	PREX2
ENSG00000066468	1100.91	1.18207	0.289536	4.08263	4.45288e-05	0.00303633	FGFR2
ENSG00000166145	1249.11	1.18367	0.370269	3.19678	0.0013897	0.0396159	SPINT1
ENSG00000077264	144.801	1.18523	0.35307	3.35692	0.000788151	0.0258377	PAK3
ENSG00000158246	1028.02	1.18562	0.207759	5.70671	1.15183e-08	2.84568e-06	FAM46B
ENSG00000013364	120.531	1.18752	0.34565	3.43561	0.000591215	0.0211824	MVP
ENSG00000101134	95.8352	1.19656	0.348611	3.43237	0.000598339	0.0213834	DOK5
ENSG00000136014	1648.4	1.2035	0.278791	4.31684	1.58278e-05	0.00135586	USP44
ENSG00000137486	167.718	1.20365	0.306633	3.92539	8.65905e-05	0.00521593	ARRB1
ENSG00000101265	225.344	1.20714	0.356487	3.38621	0.000708648	0.0240557	RASSF2
ENSG00000111261	128.45	1.2146	0.362436	3.35121	0.000804584	0.0261252	MANSC1
ENSG00000185818	2192.85	1.21974	0.326784	3.73255	0.000189549	0.00964734	NAT8L
ENSG00000163251	513.504	1.23843	0.288014	4.29988	1.70892e-05	0.00144217	FZD5
ENSG00000277013	83.577	1.24419	0.393263	3.16377	0.0015574	0.0433099	CTC-526N19.1
ENSG00000160685	530.815	1.24836	0.296737	4.20695	2.58844e-05	0.00199661	ZBTB7B
ENSG00000146530	109.329	1.25406	0.393637	3.18583	0.0014434	0.0407377	VWDE
ENSG00000181449	4308.27	1.25985	0.217092	5.80333	6.50108e-09	1.75911e-06	SOX2
ENSG00000129521	168.381	1.28128	0.325654	3.93449	8.33739e-05	0.00507598	EGLN3
ENSG00000148948	62.8962	1.28163	0.338587	3.78523	0.000153566	0.00818077	LRRC4C
ENSG00000179314	1198.26	1.28388	0.345344	3.71768	0.000201058	0.0100511	WSCD1
ENSG00000087510	147.183	1.28459	0.327032	3.92803	8.56454e-05	0.00517729	TFAP2C
ENSG00000123119	190.217	1.28797	0.302776	4.25386	2.10115e-05	0.00169755	NECAB1
ENSG00000180694	525.814	1.29361	0.281874	4.5893	4.44727e-06	0.000473829	TMEM64
ENSG00000228592	554.799	1.30154	0.248991	5.22727	1.7203e-07	2.59522e-05	D21S2088E
ENSG00000107242	52.1141	1.30372	0.415608	3.1369	0.00170743	0.0459095	PIP5K1B
ENSG00000163393	72.3291	1.30614	0.418606	3.12021	0.0018072	0.0481365	SLC22A15
ENSG00000162729	1619.83	1.30805	0.21675	6.03483	1.59133e-09	5.42547e-07	IGSF8
ENSG00000143333	291.506	1.31323	0.358869	3.65936	0.000252846	0.0117641	RGS16
ENSG00000136367	347.246	1.31756	0.384742	3.42452	0.000615878	0.0218272	ZFHX2
ENSG00000196781	1102.56	1.32571	0.377103	3.5155	0.000438922	0.0172801	TLE1
ENSG00000117643	190.239	1.33041	0.329078	4.04284	5.28066e-05	0.00346229	MAN1C1
ENSG00000124406	289.953	1.33746	0.347746	3.84607	0.000120026	0.00679763	ATP8A1
ENSG00000170425	83.3603	1.35181	0.37842	3.57224	0.000353937	0.0148154	ADORA2B
ENSG00000167081	288.819	1.35453	0.378501	3.57867	0.000345353	0.0145364	PBX3
ENSG00000204682	284.419	1.3611	0.330468	4.11872	3.80976e-05	0.00272878	CASC10
ENSG00000182326	181.144	1.37379	0.409519	3.35464	0.00079467	0.025902	C1S
ENSG00000143507	40.6569	1.38308	0.384839	3.59391	0.000325756	0.0139556	DUSP10
ENSG00000166689	235.82	1.38576	0.387022	3.58057	0.000342841	0.0144664	PLEKHA7
ENSG00000103316	160.955	1.39127	0.377837	3.68221	0.000231221	0.0110921	CRYM
ENSG00000118407	142.561	1.39434	0.360968	3.86279	0.0001121	0.00639117	FILIP1
ENSG00000181392	53.0034	1.4033	0.412763	3.39978	0.000674402	0.0233195	SYNE4
ENSG00000136603	1225.86	1.40581	0.345348	4.0707	4.68717e-05	0.00315819	SKIL
ENSG00000050344	1376.83	1.41892	0.337583	4.20318	2.63192e-05	0.00202101	NFE2L3
ENSG00000111319	475.377	1.42046	0.263495	5.39085	7.01269e-08	1.19545e-05	SCNN1A
ENSG00000137166	337.584	1.42678	0.216638	6.58598	4.51885e-11	2.48493e-08	FOXP4
ENSG00000050767	317.901	1.42777	0.4368	3.26871	0.00108039	0.0324249	COL23A1
ENSG00000154856	1268.1	1.4615	0.342084	4.27232	1.93447e-05	0.00157784	APCDD1
ENSG00000104814	114.084	1.46224	0.438856	3.33193	0.000862458	0.0270761	MAP4K1
ENSG00000183166	150.538	1.46581	0.465045	3.15198	0.00162167	0.044588	CALN1
ENSG00000102271	673.218	1.49052	0.406257	3.66892	0.000243576	0.0115478	KLHL4
ENSG00000176387	226.965	1.49393	0.426569	3.50219	0.000461444	0.0179594	HSD11B2
ENSG00000102934	69.7416	1.50304	0.43359	3.46651	0.000527265	0.0196251	PLLP
ENSG00000108379	87.6638	1.51017	0.450889	3.34933	0.00081008	0.0261542	WNT3
ENSG00000134917	241.396	1.51359	0.464007	3.26201	0.00110626	0.0329956	ADAMTS8
ENSG00000178882	117.864	1.5278	0.402427	3.79645	0.000146781	0.00794342	FAM101A
ENSG00000269404	111.722	1.52792	0.413487	3.69521	0.000219708	0.0107625	SPIB
ENSG00000102981	84.4648	1.54584	0.422278	3.66071	0.00025152	0.011747	PARD6A
ENSG00000170382	203.406	1.55845	0.294867	5.28528	1.25513e-07	1.99964e-05	LRRN2
ENSG00000197261	42.8348	1.56028	0.465092	3.35478	0.000794276	0.025902	C6orf141
ENSG00000162878	484.744	1.60248	0.43394	3.69286	0.000221746	0.0108003	PKDCC
ENSG00000156475	285.369	1.60282	0.39078	4.1016	4.10305e-05	0.00286659	PPP2R2B
ENSG00000009950	183.52	1.605	0.463569	3.46227	0.000535634	0.0198499	MLXIPL
ENSG00000074660	45.7066	1.61399	0.467216	3.45449	0.000551326	0.0201252	SCARF1
ENSG00000124493	410.752	1.61997	0.442996	3.65685	0.000255336	0.0117641	GRM4
ENSG00000198598	575.429	1.64077	0.279466	5.87109	4.32948e-09	1.31794e-06	MMP17
ENSG00000126561	156.231	1.64604	0.446373	3.68758	0.000226396	0.0109331	STAT5A
ENSG00000165731	249.435	1.64652	0.499993	3.29308	0.000990963	0.030166	RET
ENSG00000197705	48.5537	1.65329	0.484136	3.41493	0.000637987	0.0223781	KLHL14
ENSG00000102096	2464.45	1.6584	0.284875	5.82152	5.83148e-09	1.60338e-06	PIM2
ENSG00000125869	45.4851	1.67257	0.379654	4.4055	1.05539e-05	0.000967267	LAMP5
ENSG00000182732	86.794	1.6857	0.536335	3.143	0.00167226	0.0455384	RGS6
ENSG00000099994	150.091	1.69882	0.493673	3.44118	0.000579193	0.0208742	SUSD2
ENSG00000105146	41.1898	1.70128	0.475993	3.57418	0.000351333	0.0147516	AURKC
ENSG00000148926	407.882	1.7182	0.307622	5.58543	2.33117e-08	4.90611e-06	ADM
ENSG00000160712	93.7008	1.73709	0.447975	3.87764	0.000105473	0.00611567	IL6R
ENSG00000121207	803.776	1.78168	0.37191	4.79064	1.66253e-06	0.00019819	LRAT
ENSG00000213231	139.395	1.78626	0.45826	3.89791	9.70253e-05	0.00576303	TCL1B
ENSG00000145642	113.302	1.79432	0.335998	5.34027	9.2809e-08	1.50678e-05	FAM159B
ENSG00000163694	878.98	1.80086	0.353847	5.08938	3.59232e-07	5.10319e-05	RBM47
ENSG00000167994	181.012	1.8083	0.537688	3.36311	0.000770694	0.025363	RAB3IL1
ENSG00000165140	40.1796	1.84	0.518472	3.5489	0.00038685	0.0158145	FBP1
ENSG00000107742	107.933	1.86284	0.452533	4.11648	3.84703e-05	0.00274395	SPOCK2
ENSG00000100060	66.2886	1.88378	0.425931	4.42274	9.74567e-06	0.000912826	MFNG
ENSG00000158825	130.33	1.89922	0.389969	4.87018	1.11495e-06	0.000138733	CDA
ENSG00000165462	40.4071	1.95756	0.399434	4.90084	9.54271e-07	0.0001205	PHOX2A
ENSG00000255248	38.4804	1.96067	0.605262	3.23937	0.00119792	0.0351481	RP11-166D19.1
ENSG00000177706	423.569	2.00072	0.360999	5.54218	2.98726e-08	5.80407e-06	FAM20C
ENSG00000139679	132.205	2.00247	0.365161	5.48379	4.16317e-08	7.57641e-06	LPAR6
ENSG00000196767	40.9646	2.02189	0.591374	3.41897	0.000628593	0.0220941	POU3F4
ENSG00000264164	33.5029	2.03832	0.56654	3.59783	0.000320882	0.0138483	RP11-640N20.6
ENSG00000189431	34.1454	2.05645	0.566652	3.62913	0.000284377	0.0126905	RASSF10
ENSG00000198846	137.32	2.07554	0.434508	4.77676	1.78144e-06	0.00021089	TOX
ENSG00000101276	75.4381	2.11157	0.62851	3.35964	0.000780438	0.0256341	SLC52A3
ENSG00000223813	21.5115	2.11362	0.667141	3.16818	0.00153397	0.0428682	AC007255.8
ENSG00000165215	107.708	2.14071	0.526671	4.06461	4.8113e-05	0.00320384	CLDN3
ENSG00000271824	41	2.19046	0.620183	3.53196	0.000412492	0.0166388	AC009014.3
ENSG00000145536	117.259	2.1905	0.554529	3.9502	7.8086e-05	0.00480553	ADAMTS16
ENSG00000133937	20.4769	2.21163	0.633929	3.48877	0.000485252	0.0185058	GSC
ENSG00000227640	63.6202	2.23286	0.490041	4.55648	5.20188e-06	0.000543479	SOX21-AS1
ENSG00000139874	47.4541	2.26256	0.697359	3.24446	0.00117673	0.0347054	SSTR1
ENSG00000146904	1636.33	2.30816	0.638795	3.6133	0.000302328	0.0133518	EPHA1
ENSG00000114654	26.9004	2.33204	0.592921	3.93313	8.38455e-05	0.00508653	EFCC1
ENSG00000142405	75.9226	2.39386	0.685033	3.49451	0.000474927	0.0183169	NLRP12
ENSG00000258643	27.8087	2.40459	0.610785	3.93689	8.25447e-05	0.00506165	BCL2L2-PABPN1
ENSG00000136698	31.3998	2.40751	0.739462	3.25576	0.00113091	0.033528	CFC1
ENSG00000171815	13.3215	2.40918	0.686895	3.50735	0.000452601	0.0177368	PCDHB1
ENSG00000173698	161.268	2.41442	0.416601	5.79551	6.81122e-09	1.81423e-06	ADGRG2
ENSG00000147596	250.155	2.42175	0.478752	5.05846	4.22665e-07	5.85574e-05	PRDM14
ENSG00000156966	729.498	2.42204	0.736735	3.28754	0.00101067	0.0306564	B3GNT7
ENSG00000165186	128.375	2.44243	0.564548	4.32634	1.51608e-05	0.0013179	PTCHD1
ENSG00000128052	1125.71	2.50392	0.291343	8.59438	8.37131e-18	1.09774e-14	KDR
ENSG00000232301	305.215	2.56803	0.460942	5.57127	2.52895e-08	5.19409e-06	RP11-132A1.3
ENSG00000157680	20.3375	2.57076	0.806014	3.18947	0.00142533	0.0402944	DGKI
ENSG00000110944	32.751	2.58017	0.498858	5.17215	2.3141e-07	3.40072e-05	IL23A
ENSG00000260802	34.6329	2.59418	0.640265	4.05173	5.08394e-05	0.00337221	LINC00890
ENSG00000131203	103.126	2.63228	0.848146	3.10357	0.00191204	0.0498387	IDO1
ENSG00000182645	27.1632	2.64347	0.816661	3.23693	0.00120823	0.0353896	CCDC172
ENSG00000186340	447.767	2.64866	0.299379	8.8472	8.97448e-19	1.2749e-15	THBS2
ENSG00000164112	24.1149	2.66394	0.69836	3.81456	0.000136428	0.00747808	TMEM155
ENSG00000164690	17.22	2.68901	0.759872	3.53877	0.000402003	0.0163166	SHH
ENSG00000255794	107.017	2.69023	0.428995	6.27099	3.5876e-10	1.49165e-07	RMST
ENSG00000103888	16.7076	2.73751	0.819696	3.33967	0.000838775	0.0266387	CEMIP
ENSG00000160180	47.8121	2.75046	0.833683	3.29917	0.000969722	0.0297083	TFF3
ENSG00000124491	24.2968	2.82177	0.605414	4.6609	3.14834e-06	0.000350783	F13A1
ENSG00000141448	25.7271	2.9256	0.722805	4.04756	5.17536e-05	0.00340635	GATA6
ENSG00000171794	73.9887	3.07078	0.665321	4.61549	3.92175e-06	0.000423127	UTF1
ENSG00000141668	12.7427	3.14804	0.819665	3.84064	0.000122712	0.00690388	CBLN2
ENSG00000204936	27.8138	3.30728	0.950044	3.48119	0.0004992	0.0188121	CD177
ENSG00000163508	130.54	3.34075	0.892529	3.74301	0.000181826	0.00942122	EOMES
ENSG00000187140	136.858	3.38314	0.914702	3.69862	0.000216771	0.010711	FOXD3
ENSG00000125462	32.951	3.39767	0.910292	3.7325	0.000189585	0.00964734	C1orf61
ENSG00000198768	37.7262	3.45593	0.926658	3.72946	0.000191894	0.00967814	APCDD1L
ENSG00000164125	9.7022	3.46066	1.07695	3.21338	0.00131183	0.037775	FAM198B
ENSG00000204612	47.846	3.49793	0.693976	5.04042	4.64502e-07	6.33469e-05	FOXB2
ENSG00000184254	83.5121	3.51118	0.609429	5.76143	8.34058e-09	2.15427e-06	ALDH1A3
ENSG00000111704	680.131	3.52601	1.05253	3.35002	0.000808052	0.0261383	NANOG
ENSG00000157368	35.4732	3.63589	0.883567	4.11501	3.87155e-05	0.00274993	IL34
ENSG00000125285	113.189	3.64196	0.494097	7.37095	1.69422e-13	1.25571e-10	SOX21
ENSG00000156574	77.3704	3.6623	0.59355	6.17015	6.82233e-10	2.58445e-07	NODAL
ENSG00000230798	364.714	3.67656	0.690586	5.32384	1.01601e-07	1.63395e-05	FOXD3-AS1
ENSG00000226007	14.5237	3.68846	1.10997	3.32303	0.000890456	0.0277	RP11-211N8.2
ENSG00000256453	11.821	3.75331	1.09225	3.4363	0.00058971	0.0211824	DND1
ENSG00000184344	53.4476	3.7556	0.688839	5.45207	4.97867e-08	8.84078e-06	GDF3
ENSG00000255192	99.0769	3.87159	0.65212	5.93693	2.90409e-09	9.16778e-07	NANOGP8
ENSG00000147869	57.5672	3.87267	0.62639	6.18251	6.30892e-10	2.47611e-07	CER1
ENSG00000143768	49.8987	3.88699	0.819438	4.74349	2.1007e-06	0.000245279	LEFTY2
ENSG00000254934	717.203	3.92183	0.766395	5.11724	3.10031e-07	4.44126e-05	LINC00678
ENSG00000152804	30.5273	3.92698	0.934973	4.2001	2.668e-05	0.00203042	HHEX
ENSG00000101445	174.534	3.97828	1.08992	3.65007	0.000262169	0.012014	PPP1R16B
ENSG00000164093	11.7499	4.02404	1.1678	3.44582	0.000569319	0.0206055	PITX2
ENSG00000248131	151.664	4.16251	0.894231	4.65485	3.2421e-06	0.000358883	LINC01194
ENSG00000182050	70.677	4.27688	0.55387	7.72182	1.14683e-14	1.15001e-11	MGAT4C
ENSG00000065717	50.2539	4.56213	1.33044	3.42904	0.000605718	0.0215567	TLE2
ENSG00000165588	190.933	4.63149	0.795414	5.82274	5.78894e-09	1.60338e-06	OTX2
ENSG00000188816	23.0866	4.92512	1.36184	3.61651	0.000298597	0.0132557	HMX2
ENSG00000240065	17.3529	5.03113	1.45791	3.45091	0.000558695	0.0203506	PSMB9
ENSG00000104371	37.1439	6.03324	0.825114	7.312	2.63192e-13	1.86943e-10	DKK4
ENSG00000273706	17.9689	6.23967	1.24113	5.02739	4.97197e-07	6.62166e-05	LHX1
ENSG00000243709	215.784	6.63976	1.47581	4.49905	6.82571e-06	0.000676499	LEFTY1
ENSG00000164736	8.05572	7.03242	1.53142	4.59208	4.38844e-06	0.000470502	SOX17
