# Supplementary material for: Early anteroposterior regionalisation of human neural crest is shaped by a pro-mesodermal factor
Source: eLife. 2022 Sep 26;11:e74263. doi: 10.7554/eLife.74263 (PMC9536837; doi:10.7554/eLife.74263)
Supplement: Supplementary file 2. [file elife-74263-supp2.xlsx]

## Sheet: Sheet1
ID "Description" "GeneRatio" "BgRatio" "pvalue" "p.adjust" "qvalue" "geneID" "Count"
GO:0009952 "GO:0009952" "anterior/posterior pattern specification" "24/160" "227/20505" 1.86236460248598e-20 5.44741646227149e-17 4.20110246644995e-17 "ENSG00000164736/ENSG00000273706/ENSG00000165588/ENSG00000152804/ENSG00000147869/ENSG00000184344/ENSG00000156574/ENSG00000164690/ENSG00000136698/ENSG00000151379/ENSG00000128652/ENSG00000149922/ENSG00000054598/ENSG00000179111/ENSG00000198719/ENSG000…
GO:0007389 "GO:0007389" "pattern specification process" "30/160" "463/20505" 2.97641234340834e-19 4.3530030522347e-16 3.35707981680215e-16 "ENSG00000164736/ENSG00000243709/ENSG00000273706/ENSG00000165588/ENSG00000164093/ENSG00000152804/ENSG00000147869/ENSG00000184344/ENSG00000156574/ENSG00000163508/ENSG00000164690/ENSG00000136698/ENSG00000133937/ENSG00000100060/ENSG00000151379/ENSG00000128652/ENS…
GO:0003002 "GO:0003002" "regionalization" "27/160" "368/20505" 9.29105778167819e-19 9.05878133713623e-16 6.98622344776714e-16 "ENSG00000164736/ENSG00000273706/ENSG00000165588/ENSG00000164093/ENSG00000152804/ENSG00000147869/ENSG00000184344/ENSG00000156574/ENSG00000163508/ENSG00000164690/ENSG00000136698/ENSG00000133937/ENSG00000151379/ENSG00000128652/ENSG00000149922/ENSG00000054598/ENSG00000179111/…
GO:0001756 "GO:0001756" "somitogenesis" "14/160" "76/20505" 7.8829186661576e-16 4.68472319180948e-13 3.61290573101132e-13 "ENSG00000273706/ENSG00000184344/ENSG00000151379/ENSG00000149922/ENSG00000054598/ENSG00000179111/ENSG00000198719/ENSG00000103241/ENSG00000090932/ENSG00000128918/ENSG00000154342/ENSG00000076356/ENSG00000114251/ENSG00000188290" 14
GO:0061053 "GO:0061053" "somite development" "15/160" "95/20505" 8.00807383215295e-16 4.68472319180948e-13 3.61290573101132e-13 "ENSG00000273706/ENSG00000184344/ENSG00000164690/ENSG00000151379/ENSG00000149922/ENSG00000054598/ENSG00000179111/ENSG00000198719/ENSG00000103241/ENSG00000090932/ENSG00000128918/ENSG00000154342/ENSG00000076356/ENSG00000114251/ENSG00000188290" 15
GO:0007369 "GO:0007369" "gastrulation" "19/160" "201/20505" 1.76921421409427e-15 8.62491929370954e-13 6.65162466807721e-13 "ENSG00000164736/ENSG00000273706/ENSG00000165588/ENSG00000147869/ENSG00000184344/ENSG00000156574/ENSG00000111704/ENSG00000163508/ENSG00000141448/ENSG00000136698/ENSG00000133937/ENSG00000149922/ENSG00000054598/ENSG00000103241/ENSG00000154342/ENSG00000134817/ENSG00000107831/ENS…
GO:0007498 "GO:0007498" "mesoderm development" "16/160" "141/20505" 1.83685738995804e-14 7.67543980803896e-12 5.91937652132343e-12 "ENSG00000164736/ENSG00000147869/ENSG00000184344/ENSG00000156574/ENSG00000163508/ENSG00000164690/ENSG00000176692/ENSG00000149922/ENSG00000054598/ENSG00000179111/ENSG00000103241/ENSG00000090932/ENSG00000154342/ENSG00000107831/ENSG00000114251/ENSG00000106484" 16
GO:0048568 "GO:0048568" "embryonic organ development" "25/160" "462/20505" 2.37253265645777e-14 8.67457252517373e-12 6.68991774051185e-12 "ENSG00000164736/ENSG00000273706/ENSG00000188816/ENSG00000184344/ENSG00000156574/ENSG00000184254/ENSG00000163508/ENSG00000164690/ENSG00000128052/ENSG00000133937/ENSG00000196767/ENSG00000148926/ENSG00000146374/ENSG00000128652/ENSG00000054598/ENSG00000198719/ENSG…
GO:0035282 "GO:0035282" "segmentation" "14/160" "106/20505" 9.92322649002354e-14 3.22504860925765e-11 2.48718998457549e-11 "ENSG00000273706/ENSG00000184344/ENSG00000151379/ENSG00000149922/ENSG00000054598/ENSG00000179111/ENSG00000198719/ENSG00000103241/ENSG00000090932/ENSG00000128918/ENSG00000154342/ENSG00000076356/ENSG00000114251/ENSG00000188290" 14
GO:0009855 "GO:0009855" "determination of bilateral symmetry" "13/160" "130/20505" 2.89341091848741e-11 8.46322693657568e-09 6.52692589296687e-09 "ENSG00000164736/ENSG00000243709/ENSG00000164093/ENSG00000147869/ENSG00000156574/ENSG00000164690/ENSG00000136698/ENSG00000198719/ENSG00000103241/ENSG00000128918/ENSG00000154342/ENSG00000107831/ENSG00000114251" 13
GO:0009799 "GO:0009799" "specification of symmetry" "13/160" "131/20505" 3.19075668172237e-11 8.48451208548903e-09 6.54334121428807e-09 "ENSG00000164736/ENSG00000243709/ENSG00000164093/ENSG00000147869/ENSG00000156574/ENSG00000164690/ENSG00000136698/ENSG00000198719/ENSG00000103241/ENSG00000128918/ENSG00000154342/ENSG00000107831/ENSG00000114251" 13
GO:0060485 "GO:0060485" "mesenchyme development" "17/160" "278/20505" 6.57067361344564e-11 1.60160169327738e-08 1.23517136435211e-08 "ENSG00000164093/ENSG00000147869/ENSG00000156574/ENSG00000163508/ENSG00000164690/ENSG00000133937/ENSG00000165731/ENSG00000054598/ENSG00000019549/ENSG00000103241/ENSG00000090932/ENSG00000128918/ENSG00000154342/ENSG00000107831/ENSG00000114251/ENSG00000102678/ENSG00000…
GO:0009798 "GO:0009798" "axis specification" "11/160" "87/20505" 7.76100939767107e-11 1.74622711447599e-08 1.34670794649466e-08 "ENSG00000273706/ENSG00000165588/ENSG00000164093/ENSG00000147869/ENSG00000184344/ENSG00000156574/ENSG00000164690/ENSG00000149922/ENSG00000198719/ENSG00000125931/ENSG00000114251" 11
GO:0007368 "GO:0007368" "determination of left/right symmetry" "12/160" "120/20505" 1.71429376078345e-10 3.581649464494e-08 2.76220415741274e-08 "ENSG00000164736/ENSG00000243709/ENSG00000164093/ENSG00000147869/ENSG00000156574/ENSG00000164690/ENSG00000136698/ENSG00000198719/ENSG00000103241/ENSG00000154342/ENSG00000107831/ENSG00000114251" 12
GO:0072001 "GO:0072001" "renal system development" "17/160" "306/20505" 2.91994169181537e-10 5.69388629903997e-08 4.39118248811251e-08 "ENSG00000164736/ENSG00000273706/ENSG00000147869/ENSG00000164690/ENSG00000145536/ENSG00000165731/ENSG00000198598/ENSG00000054598/ENSG00000198719/ENSG00000103241/ENSG00000162849/ENSG00000128918/ENSG00000125931/ENSG00000176928/ENSG00000107831/ENSG00000114251/ENSG000…
GO:0001704 "GO:0001704" "formation of primary germ layer" "12/160" "137/20505" 8.06680804361285e-10 1.47471334547297e-07 1.13731379193831e-07 "ENSG00000164736/ENSG00000273706/ENSG00000156574/ENSG00000111704/ENSG00000163508/ENSG00000141448/ENSG00000149922/ENSG00000054598/ENSG00000103241/ENSG00000154342/ENSG00000114251/ENSG00000204262" 12
GO:0048863 "GO:0048863" "stem cell differentiation" "14/160" "210/20505" 1.11910546058294e-09 1.92551968953242e-07 1.48498018701501e-07 "ENSG00000164736/ENSG00000164093/ENSG00000125285/ENSG00000163508/ENSG00000141448/ENSG00000164690/ENSG00000133937/ENSG00000165731/ENSG00000054598/ENSG00000019549/ENSG00000128918/ENSG00000154342/ENSG00000135363/ENSG00000134853" 14
GO:0001655 "GO:0001655" "urogenital system development" "17/160" "343/20505" 1.66967304958322e-09 2.71321870557273e-07 2.09246160541335e-07 "ENSG00000164736/ENSG00000273706/ENSG00000147869/ENSG00000164690/ENSG00000145536/ENSG00000165731/ENSG00000198598/ENSG00000054598/ENSG00000198719/ENSG00000103241/ENSG00000162849/ENSG00000128918/ENSG00000125931/ENSG00000176928/ENSG00000107831/ENSG00000114251/EN…
GO:0048562 "GO:0048562" "embryonic organ morphogenesis" "16/160" "304/20505" 2.18892849046073e-09 3.36979780768297e-07 2.59882202496252e-07 "ENSG00000164736/ENSG00000273706/ENSG00000188816/ENSG00000156574/ENSG00000184254/ENSG00000164690/ENSG00000133937/ENSG00000196767/ENSG00000128652/ENSG00000198719/ENSG00000103241/ENSG00000154342/ENSG00000107831/ENSG00000114251/ENSG00000102678/ENSG00000134853" 16
GO:0001708 "GO:0001708" "cell fate specification" "10/160" "92/20505" 2.6259108214784e-09 3.84039457641217e-07 2.96175099496222e-07 "ENSG00000164736/ENSG00000156574/ENSG00000111704/ENSG00000163508/ENSG00000164690/ENSG00000147596/ENSG00000133937/ENSG00000149922/ENSG00000198719/ENSG00000154342" 10
GO:0030900 "GO:0030900" "forebrain development" "18/160" "407/20505" 3.27052546906758e-09 4.55537476048698e-07 3.51315091739941e-07 "ENSG00000273706/ENSG00000165588/ENSG00000164093/ENSG00000184254/ENSG00000163508/ENSG00000164690/ENSG00000165186/ENSG00000139874/ENSG00000133937/ENSG00000196767/ENSG00000100678/ENSG00000169297/ENSG00000128918/ENSG00000154342/ENSG00000187122/ENSG00000183023/ENSG000001…
GO:0009948 "GO:0009948" "anterior/posterior axis specification" "8/160" "51/20505" 5.52120970183166e-09 7.34069926266254e-07 5.66122123972499e-07 "ENSG00000273706/ENSG00000165588/ENSG00000147869/ENSG00000184344/ENSG00000156574/ENSG00000164690/ENSG00000149922/ENSG00000114251" 8
GO:0045165 "GO:0045165" "cell fate commitment" "15/160" "283/20505" 6.48411359422778e-09 8.24610098396359e-07 6.35947617044857e-07 "ENSG00000164736/ENSG00000184344/ENSG00000156574/ENSG00000111704/ENSG00000163508/ENSG00000141448/ENSG00000164690/ENSG00000110944/ENSG00000147596/ENSG00000133937/ENSG00000149922/ENSG00000198719/ENSG00000154342/ENSG00000107831/ENSG00000114251" 15
GO:0023019 "GO:0023019" "signal transduction involved in regulation of gene expression" "6/160" "20/20505" 7.27475354444972e-09 8.86610588229809e-07 6.83763019550691e-07 "ENSG00000164736/ENSG00000147869/ENSG00000133937/ENSG00000149922/ENSG00000107831/ENSG00000134853" 6
GO:0035270 "GO:0035270" "endocrine system development" "11/160" "133/20505" 7.68856510464927e-09 8.99562117243964e-07 6.93751369232142e-07 "ENSG00000164093/ENSG00000141448/ENSG00000164690/ENSG00000160712/ENSG00000128652/ENSG00000169297/ENSG00000198719/ENSG00000128918/ENSG00000107831/ENSG00000114251/ENSG00000134853" 11
GO:0003007 "GO:0003007" "heart morphogenesis" "14/160" "258/20505" 1.57554370694211e-08 1.77248667030987e-06 1.36695958055747e-06 "ENSG00000164736/ENSG00000243709/ENSG00000164093/ENSG00000156574/ENSG00000141448/ENSG00000164690/ENSG00000054598/ENSG00000019549/ENSG00000198719/ENSG00000103241/ENSG00000128918/ENSG00000154342/ENSG00000107831/ENSG00000114251" 14
GO:0007492 "GO:0007492" "endoderm development" "9/160" "84/20505" 1.91042941523263e-08 2.06963186650201e-06 1.59612095003646e-06 "ENSG00000164736/ENSG00000273706/ENSG00000184344/ENSG00000156574/ENSG00000111704/ENSG00000163508/ENSG00000141448/ENSG00000107831/ENSG00000204262" 9
GO:0090009 "GO:0090009" "primitive streak formation" "5/160" "12/20505" 2.05887130910138e-08 2.15078520682912e-06 1.65870722383619e-06 "ENSG00000273706/ENSG00000165588/ENSG00000184344/ENSG00000156574/ENSG00000114251" 5
GO:0009880 "GO:0009880" "embryonic pattern specification" "8/160" "65/20505" 3.99019739807109e-08 4.02459565150273e-06 3.10380872016927e-06 "ENSG00000273706/ENSG00000184344/ENSG00000156574/ENSG00000164690/ENSG00000149922/ENSG00000198719/ENSG00000125931/ENSG00000114251" 8
GO:0061371 "GO:0061371" "determination of heart left/right asymmetry" "8/160" "67/20505" 5.08865000012263e-08 4.96143375011957e-06 3.8263077018466e-06 "ENSG00000164736/ENSG00000147869/ENSG00000156574/ENSG00000164690/ENSG00000198719/ENSG00000154342/ENSG00000107831/ENSG00000114251" 8
GO:0001822 "GO:0001822" "kidney development" "14/160" "291/20505" 7.1005610510055e-08 6.69972292715841e-06 5.16689383100332e-06 "ENSG00000273706/ENSG00000147869/ENSG00000164690/ENSG00000145536/ENSG00000165731/ENSG00000198598/ENSG00000054598/ENSG00000198719/ENSG00000162849/ENSG00000128918/ENSG00000125931/ENSG00000176928/ENSG00000107831/ENSG00000134853" 14
GO:0042074 "GO:0042074" "cell migration involved in gastrulation" "5/160" "15/20505" 7.66008222197832e-08 7.00179390602706e-06 5.39985401371695e-06 "ENSG00000164736/ENSG00000147869/ENSG00000156574/ENSG00000107831/ENSG00000114251" 5
GO:0021915 "GO:0021915" "neural tube development" "11/160" "167/20505" 8.186267256741e-08 7.25600961392952e-06 5.59590772924911e-06 "ENSG00000164736/ENSG00000156574/ENSG00000164690/ENSG00000133937/ENSG00000148926/ENSG00000128918/ENSG00000154342/ENSG00000076356/ENSG00000107831/ENSG00000185614/ENSG00000114251" 11
GO:0048706 "GO:0048706" "embryonic skeletal system development" "10/160" "132/20505" 8.70445380451899e-08 7.48839040535825e-06 5.77512213717777e-06 "ENSG00000273706/ENSG00000156574/ENSG00000164690/ENSG00000133937/ENSG00000128645/ENSG00000128652/ENSG00000114251/ENSG00000172789/ENSG00000102678/ENSG00000134853" 10
GO:0001657 "GO:0001657" "ureteric bud development" "9/160" "103/20505" 1.14808273936583e-07 9.59469146470017e-06 7.39952273822851e-06 "ENSG00000273706/ENSG00000147869/ENSG00000164690/ENSG00000145536/ENSG00000165731/ENSG00000054598/ENSG00000162849/ENSG00000125931/ENSG00000107831" 9
GO:0072163 "GO:0072163" "mesonephric epithelium development" "9/160" "104/20505" 1.24853596597741e-07 9.87018297428084e-06 7.61198456639994e-06 "ENSG00000273706/ENSG00000147869/ENSG00000164690/ENSG00000145536/ENSG00000165731/ENSG00000054598/ENSG00000162849/ENSG00000125931/ENSG00000107831" 9
GO:0072164 "GO:0072164" "mesonephric tubule development" "9/160" "104/20505" 1.24853596597741e-07 9.87018297428084e-06 7.61198456639994e-06 "ENSG00000273706/ENSG00000147869/ENSG00000164690/ENSG00000145536/ENSG00000165731/ENSG00000054598/ENSG00000162849/ENSG00000125931/ENSG00000107831" 9
GO:0035050 "GO:0035050" "embryonic heart tube development" "8/160" "76/20505" 1.38632068039038e-07 1.06710210266891e-05 8.22959894204039e-06 "ENSG00000164736/ENSG00000156574/ENSG00000164690/ENSG00000054598/ENSG00000198719/ENSG00000154342/ENSG00000107831/ENSG00000114251" 8
GO:0045995 "GO:0045995" "regulation of embryonic development" "10/160" "140/20505" 1.51708339643648e-07 1.12384737245494e-05 8.66722418055218e-06 "ENSG00000164736/ENSG00000273706/ENSG00000165588/ENSG00000156574/ENSG00000164690/ENSG00000179111/ENSG00000198719/ENSG00000154342/ENSG00000114251/ENSG00000204262" 10
GO:0001570 "GO:0001570" "vasculogenesis" "8/160" "77/20505" 1.53688529566488e-07 1.12384737245494e-05 8.66722418055218e-06 "ENSG00000164736/ENSG00000164690/ENSG00000128052/ENSG00000148926/ENSG00000105855/ENSG00000103241/ENSG00000125931/ENSG00000134817" 8
GO:0001823 "GO:0001823" "mesonephros development" "9/160" "108/20505" 1.7309039242003e-07 1.23485218982582e-05 9.52330451748714e-06 "ENSG00000273706/ENSG00000147869/ENSG00000164690/ENSG00000145536/ENSG00000165731/ENSG00000054598/ENSG00000162849/ENSG00000125931/ENSG00000107831" 9
GO:0072006 "GO:0072006" "nephron development" "10/160" "145/20505" 2.10853781857938e-07 1.46844598079635e-05 1.13248033714677e-05 "ENSG00000273706/ENSG00000164690/ENSG00000145536/ENSG00000165731/ENSG00000054598/ENSG00000198719/ENSG00000162849/ENSG00000125931/ENSG00000107831/ENSG00000134853" 10
GO:0001707 "GO:0001707" "mesoderm formation" "8/160" "82/20505" 2.51878531652955e-07 1.6973392978715e-05 1.3090051697125e-05 "ENSG00000164736/ENSG00000156574/ENSG00000163508/ENSG00000149922/ENSG00000054598/ENSG00000103241/ENSG00000154342/ENSG00000114251" 8
GO:0048565 "GO:0048565" "digestive tract development" "10/160" "148/20505" 2.55326253355029e-07 1.6973392978715e-05 1.3090051697125e-05 "ENSG00000164736/ENSG00000156574/ENSG00000141448/ENSG00000164690/ENSG00000165731/ENSG00000103241/ENSG00000128918/ENSG00000114251/ENSG00000102678/ENSG00000134853" 10
GO:0048732 "GO:0048732" "gland development" "17/160" "485/20505" 2.63383307133784e-07 1.71199149636959e-05 1.32030509283672e-05 "ENSG00000164093/ENSG00000156574/ENSG00000184254/ENSG00000141448/ENSG00000164690/ENSG00000126561/ENSG00000128652/ENSG00000054598/ENSG00000169297/ENSG00000019549/ENSG00000135960/ENSG00000103241/ENSG00000128918/ENSG00000154342/ENSG00000107831/ENSG00000114251/ENSG0000013485…
GO:0072073 "GO:0072073" "kidney epithelium development" "10/160" "149/20505" 2.71877939693113e-07 1.7287890730486e-05 1.3332595532319e-05 "ENSG00000273706/ENSG00000147869/ENSG00000164690/ENSG00000145536/ENSG00000165731/ENSG00000054598/ENSG00000198719/ENSG00000162849/ENSG00000125931/ENSG00000107831" 10
GO:0048332 "GO:0048332" "mesoderm morphogenesis" "8/160" "84/20505" 3.04051861009119e-07 1.89223764564185e-05 1.45931273940099e-05 "ENSG00000164736/ENSG00000156574/ENSG00000163508/ENSG00000149922/ENSG00000054598/ENSG00000103241/ENSG00000154342/ENSG00000114251" 8
GO:0090596 "GO:0090596" "sensory organ morphogenesis" "13/160" "282/20505" 3.45903180888125e-07 2.10784750853701e-05 1.62559323825274e-05 "ENSG00000273706/ENSG00000188816/ENSG00000164093/ENSG00000184254/ENSG00000133937/ENSG00000196767/ENSG00000198719/ENSG00000197406/ENSG00000154342/ENSG00000107831/ENSG00000114251/ENSG00000204262/ENSG00000102678" 13
GO:0048608 "GO:0048608" "reproductive structure development" "16/160" "440/20505" 3.70987244193858e-07 2.19199474179211e-05 1.69048843244642e-05 "ENSG00000273706/ENSG00000156574/ENSG00000163508/ENSG00000171794/ENSG00000141448/ENSG00000164690/ENSG00000148926/ENSG00000146374/ENSG00000054598/ENSG00000169297/ENSG00000105855/ENSG00000125931/ENSG00000107831/ENSG00000114251/ENSG00000102678/ENSG000001348…
GO:0001706 "GO:0001706" "endoderm formation" "7/160" "59/20505" 3.74699955861898e-07 2.19199474179211e-05 1.69048843244642e-05 "ENSG00000164736/ENSG00000273706/ENSG00000156574/ENSG00000111704/ENSG00000163508/ENSG00000141448/ENSG00000204262" 7
GO:0061458 "GO:0061458" "reproductive system development" "16/160" "443/20505" 4.06145533899007e-07 2.3293640914796e-05 1.79642905912399e-05 "ENSG00000273706/ENSG00000156574/ENSG00000163508/ENSG00000171794/ENSG00000141448/ENSG00000164690/ENSG00000148926/ENSG00000146374/ENSG00000054598/ENSG00000169297/ENSG00000105855/ENSG00000125931/ENSG00000107831/ENSG00000114251/ENSG00000102678/ENSG00000134853" …
GO:0001701 "GO:0001701" "in utero embryonic development" "14/160" "339/20505" 4.56892715479931e-07 2.57002152457461e-05 1.98202649650505e-05 "ENSG00000164736/ENSG00000184344/ENSG00000156574/ENSG00000187140/ENSG00000163508/ENSG00000141448/ENSG00000147596/ENSG00000148926/ENSG00000146374/ENSG00000054598/ENSG00000103241/ENSG00000125931/ENSG00000154342/ENSG00000134853" 14
GO:0001947 "GO:0001947" "heart looping" "7/160" "61/20505" 4.72958478299363e-07 2.61019537552007e-05 2.01300897516492e-05 "ENSG00000164736/ENSG00000156574/ENSG00000164690/ENSG00000198719/ENSG00000154342/ENSG00000107831/ENSG00000114251" 7
GO:2000380 "GO:2000380" "regulation of mesoderm development" "5/160" "21/20505" 4.99781173537075e-07 2.70714802332582e-05 2.08777983409347e-05 "ENSG00000164736/ENSG00000147869/ENSG00000156574/ENSG00000164690/ENSG00000154342" 5
GO:0071542 "GO:0071542" "dopaminergic neuron differentiation" "6/160" "39/20505" 5.41765255290078e-07 2.88120613040633e-05 2.22201520016581e-05 "ENSG00000165588/ENSG00000164690/ENSG00000165462/ENSG00000154342/ENSG00000107831/ENSG00000114251" 6
GO:0055123 "GO:0055123" "digestive system development" "10/160" "162/20505" 5.9024706526391e-07 3.08298690338739e-05 2.37763056552737e-05 "ENSG00000164736/ENSG00000156574/ENSG00000141448/ENSG00000164690/ENSG00000165731/ENSG00000103241/ENSG00000128918/ENSG00000114251/ENSG00000102678/ENSG00000134853" 10
GO:0050679 "GO:0050679" "positive regulation of epithelial cell proliferation" "11/160" "207/20505" 7.10528315256971e-07 3.64613214408182e-05 2.81193384966886e-05 "ENSG00000101445/ENSG00000156574/ENSG00000164690/ENSG00000128052/ENSG00000126561/ENSG00000163235/ENSG00000154342/ENSG00000134817/ENSG00000114251/ENSG00000006606/ENSG00000102678" 11
GO:0045766 "GO:0045766" "positive regulation of angiogenesis" "11/160" "208/20505" 7.45209659653235e-07 3.75816940428571e-05 2.89833811367855e-05 "ENSG00000101445/ENSG00000156574/ENSG00000141448/ENSG00000128052/ENSG00000146904/ENSG00000148926/ENSG00000176692/ENSG00000105855/ENSG00000198719/ENSG00000134817/ENSG00000114251" 11
GO:0001503 "GO:0001503" "ossification" "15/160" "411/20505" 8.36372124348093e-07 4.14642112494605e-05 3.19776175285988e-05 "ENSG00000147869/ENSG00000164690/ENSG00000177706/ENSG00000160712/ENSG00000181195/ENSG00000054598/ENSG00000019549/ENSG00000125931/ENSG00000154342/ENSG00000183023/ENSG00000114251/ENSG00000204262/ENSG00000102678/ENSG00000162733/ENSG00000140937" 15
GO:0003143 "GO:0003143" "embryonic heart tube morphogenesis" "7/160" "67/20505" 9.06565029613744e-07 4.419504519367e-05 3.40836641835483e-05 "ENSG00000164736/ENSG00000156574/ENSG00000164690/ENSG00000198719/ENSG00000154342/ENSG00000107831/ENSG00000114251" 7
GO:0060562 "GO:0060562" "epithelial tube morphogenesis" "14/160" "360/20505" 9.3574734648691e-07 4.4869852270069e-05 3.46040822005427e-05 "ENSG00000164736/ENSG00000273706/ENSG00000156574/ENSG00000164690/ENSG00000145536/ENSG00000148926/ENSG00000165731/ENSG00000198719/ENSG00000103241/ENSG00000162849/ENSG00000125931/ENSG00000154342/ENSG00000107831/ENSG00000114251" 14
GO:0048762 "GO:0048762" "mesenchymal cell differentiation" "11/160" "218/20505" 1.18318517462898e-06 5.58196231578994e-05 4.30486558443107e-05 "ENSG00000164093/ENSG00000163508/ENSG00000164690/ENSG00000133937/ENSG00000165731/ENSG00000054598/ENSG00000019549/ENSG00000128918/ENSG00000107831/ENSG00000114251/ENSG00000168675" 11
GO:0010470 "GO:0010470" "regulation of gastrulation" "6/160" "45/20505" 1.30125450436436e-06 6.04153877026308e-05 4.6592955770306e-05 "ENSG00000164736/ENSG00000273706/ENSG00000165588/ENSG00000156574/ENSG00000154342/ENSG00000204262" 6
GO:2000027 "GO:2000027" "regulation of animal organ morphogenesis" "11/160" "224/20505" 1.54309898767398e-06 7.05244459210373e-05 5.43891633319956e-05 "ENSG00000164736/ENSG00000273706/ENSG00000164690/ENSG00000146374/ENSG00000054598/ENSG00000019549/ENSG00000125931/ENSG00000197406/ENSG00000154342/ENSG00000107831/ENSG00000114251" 11
GO:0060795 "GO:0060795" "cell fate commitment involved in formation of primary germ layer" "6/160" "47/20505" 1.69349620686037e-06 7.62073293087167e-05 5.87718602639964e-05 "ENSG00000164736/ENSG00000156574/ENSG00000111704/ENSG00000163508/ENSG00000141448/ENSG00000154342" 6
GO:0001654 "GO:0001654" "eye development" "14/160" "382/20505" 1.88061545538781e-06 8.27184020901805e-05 6.37932652017119e-05 "ENSG00000273706/ENSG00000164093/ENSG00000184344/ENSG00000184254/ENSG00000164690/ENSG00000165731/ENSG00000054598/ENSG00000198719/ENSG00000128918/ENSG00000197406/ENSG00000114251/ENSG00000204262/ENSG00000102678/ENSG00000134853" 14
GO:1901342 "GO:1901342" "regulation of vasculature development" "15/160" "439/20505" 1.8947463042879e-06 8.27184020901805e-05 6.37932652017119e-05 "ENSG00000101445/ENSG00000152804/ENSG00000156574/ENSG00000141448/ENSG00000186340/ENSG00000128052/ENSG00000146904/ENSG00000148926/ENSG00000176692/ENSG00000054598/ENSG00000105855/ENSG00000198719/ENSG00000134817/ENSG00000114251/ENSG00000102678" 15
GO:0150063 "GO:0150063" "visual system development" "14/160" "383/20505" 1.93893651703257e-06 8.34027840047096e-05 6.43210674303527e-05 "ENSG00000273706/ENSG00000164093/ENSG00000184344/ENSG00000184254/ENSG00000164690/ENSG00000165731/ENSG00000054598/ENSG00000198719/ENSG00000128918/ENSG00000197406/ENSG00000114251/ENSG00000204262/ENSG00000102678/ENSG00000134853" 14
GO:0043583 "GO:0043583" "ear development" "11/160" "231/20505" 2.08179061305014e-06 8.82498194662559e-05 6.80591500193203e-05 "ENSG00000188816/ENSG00000184254/ENSG00000164690/ENSG00000133937/ENSG00000196767/ENSG00000198719/ENSG00000154342/ENSG00000145824/ENSG00000107831/ENSG00000114251/ENSG00000102678" 11
GO:0072132 "GO:0072132" "mesenchyme morphogenesis" "6/160" "49/20505" 2.17728393408368e-06 9.09793643884967e-05 7.01642025675388e-05 "ENSG00000054598/ENSG00000019549/ENSG00000103241/ENSG00000154342/ENSG00000107831/ENSG00000114251" 6
GO:0007494 "GO:0007494" "midgut development" "4/160" "13/20505" 2.41669508724607e-06 9.81782379193716e-05 7.5716046373806e-05 "ENSG00000165731/ENSG00000103241/ENSG00000128918/ENSG00000114251" 4
GO:0072189 "GO:0072189" "ureter development" "4/160" "13/20505" 2.41669508724607e-06 9.81782379193716e-05 7.5716046373806e-05 "ENSG00000164690/ENSG00000165731/ENSG00000103241/ENSG00000128918" 4
GO:0044344 "GO:0044344" "cellular response to fibroblast growth factor stimulus" "9/160" "149/20505" 2.62911837242497e-06 0.00010534481149785 8.12429801313152e-05 "ENSG00000273706/ENSG00000165588/ENSG00000147596/ENSG00000177706/ENSG00000186895/ENSG00000107831/ENSG00000114251/ENSG00000158815/ENSG00000102678" 9
GO:0048546 "GO:0048546" "digestive tract morphogenesis" "6/160" "51/20505" 2.76823183299052e-06 0.000106956370199572 8.24858304409115e-05 "ENSG00000164736/ENSG00000156574/ENSG00000164690/ENSG00000103241/ENSG00000114251/ENSG00000134853" 6
GO:0048880 "GO:0048880" "sensory system development" "14/160" "395/20505" 2.77614861788424e-06 0.000106956370199572 8.24858304409115e-05 "ENSG00000273706/ENSG00000164093/ENSG00000184344/ENSG00000184254/ENSG00000164690/ENSG00000165731/ENSG00000054598/ENSG00000198719/ENSG00000128918/ENSG00000197406/ENSG00000114251/ENSG00000204262/ENSG00000102678/ENSG00000134853" 14
GO:1904018 "GO:1904018" "positive regulation of vasculature development" "11/160" "238/20505" 2.77903731116837e-06 0.000106956370199572 8.24858304409115e-05 "ENSG00000101445/ENSG00000156574/ENSG00000141448/ENSG00000128052/ENSG00000146904/ENSG00000148926/ENSG00000176692/ENSG00000105855/ENSG00000198719/ENSG00000134817/ENSG00000114251" 11
GO:0045765 "GO:0045765" "regulation of angiogenesis" "14/160" "397/20505" 2.94339361937094e-06 0.000111810731644935 8.62295629024186e-05 "ENSG00000101445/ENSG00000152804/ENSG00000156574/ENSG00000141448/ENSG00000186340/ENSG00000128052/ENSG00000146904/ENSG00000148926/ENSG00000176692/ENSG00000054598/ENSG00000105855/ENSG00000198719/ENSG00000134817/ENSG00000114251" 14
GO:0048738 "GO:0048738" "cardiac muscle tissue development" "11/160" "240/20505" 3.01255977173391e-06 0.000112641621846306 8.68703537981591e-05 "ENSG00000141448/ENSG00000186895/ENSG00000054598/ENSG00000198719/ENSG00000128918/ENSG00000154342/ENSG00000183023/ENSG00000107831/ENSG00000114251/ENSG00000102678/ENSG00000134853" 11
GO:0031016 "GO:0031016" "pancreas development" "7/160" "80/20505" 3.04228653875494e-06 0.000112641621846306 8.68703537981591e-05 "ENSG00000141448/ENSG00000164690/ENSG00000160712/ENSG00000198719/ENSG00000103241/ENSG00000128918/ENSG00000114251" 7
GO:0035987 "GO:0035987" "endodermal cell differentiation" "6/160" "52/20505" 3.10924250764108e-06 0.000113681679185627 8.7672456498353e-05 "ENSG00000164736/ENSG00000156574/ENSG00000111704/ENSG00000163508/ENSG00000141448/ENSG00000204262" 6
GO:0001702 "GO:0001702" "gastrulation with mouth forming second" "5/160" "30/20505" 3.30700432612671e-06 0.00011801398868713 9.1013577240313e-05 "ENSG00000273706/ENSG00000165588/ENSG00000184344/ENSG00000156574/ENSG00000114251" 5
GO:0021536 "GO:0021536" "diencephalon development" "7/160" "81/20505" 3.30842634951955e-06 0.00011801398868713 9.1013577240313e-05 "ENSG00000164093/ENSG00000164690/ENSG00000165186/ENSG00000169297/ENSG00000128918/ENSG00000107831/ENSG00000114251" 7
GO:0071774 "GO:0071774" "response to fibroblast growth factor" "9/160" "155/20505" 3.63978546974162e-06 0.000126780707355865 9.7774559015247e-05 "ENSG00000273706/ENSG00000165588/ENSG00000147596/ENSG00000177706/ENSG00000186895/ENSG00000107831/ENSG00000114251/ENSG00000158815/ENSG00000102678" 9
GO:0048839 "GO:0048839" "inner ear development" "10/160" "198/20505" 3.64088185227098e-06 0.000126780707355865 9.7774559015247e-05 "ENSG00000188816/ENSG00000184254/ENSG00000164690/ENSG00000196767/ENSG00000198719/ENSG00000154342/ENSG00000145824/ENSG00000107831/ENSG00000114251/ENSG00000102678" 10
GO:0014706 "GO:0014706" "striated muscle tissue development" "14/160" "405/20505" 3.70587850371108e-06 0.000127525819098293 9.83491966991064e-05 "ENSG00000164736/ENSG00000163508/ENSG00000141448/ENSG00000164690/ENSG00000186895/ENSG00000054598/ENSG00000198719/ENSG00000128918/ENSG00000154342/ENSG00000183023/ENSG00000107831/ENSG00000114251/ENSG00000102678/ENSG00000134853" 14
GO:0008543 "GO:0008543" "fibroblast growth factor receptor signaling pathway" "8/160" "118/20505" 4.07831117186161e-06 0.000137115634226382 0.000105744958757404 "ENSG00000165588/ENSG00000147596/ENSG00000177706/ENSG00000186895/ENSG00000107831/ENSG00000114251/ENSG00000158815/ENSG00000102678" 8
GO:0072009 "GO:0072009" "nephron epithelium development" "8/160" "118/20505" 4.07831117186161e-06 0.000137115634226382 0.000105744958757404 "ENSG00000273706/ENSG00000164690/ENSG00000145536/ENSG00000054598/ENSG00000198719/ENSG00000162849/ENSG00000125931/ENSG00000107831" 8
GO:0048368 "GO:0048368" "lateral mesoderm development" "4/160" "15/20505" 4.55780453590005e-06 0.000151495207585314 0.000116834630627199 "ENSG00000147869/ENSG00000156574/ENSG00000164690/ENSG00000103241" 4
GO:0018108 "GO:0018108" "peptidyl-tyrosine phosphorylation" "14/160" "413/20505" 4.63961360815758e-06 0.000152481683189449 0.000117595410553302 "ENSG00000110944/ENSG00000128052/ENSG00000146904/ENSG00000160712/ENSG00000165731/ENSG00000126561/ENSG00000186895/ENSG00000163235/ENSG00000154342/ENSG00000107831/ENSG00000158815/ENSG00000102678/ENSG00000162733/ENSG00000134853" 14
GO:0018212 "GO:0018212" "peptidyl-tyrosine modification" "14/160" "416/20505" 5.04040923472301e-06 0.000163813300128498 0.000126334467719432 "ENSG00000110944/ENSG00000128052/ENSG00000146904/ENSG00000160712/ENSG00000165731/ENSG00000126561/ENSG00000186895/ENSG00000163235/ENSG00000154342/ENSG00000107831/ENSG00000158815/ENSG00000102678/ENSG00000162733/ENSG00000134853" 14
GO:0014033 "GO:0014033" "neural crest cell differentiation" "7/160" "87/20505" 5.34644023612443e-06 0.000171849864732571 0.000132532347322321 "ENSG00000164093/ENSG00000164690/ENSG00000133937/ENSG00000165731/ENSG00000054598/ENSG00000019549/ENSG00000128918" 7
GO:0060537 "GO:0060537" "muscle tissue development" "14/160" "421/20505" 5.77718016058501e-06 0.000183676651844687 0.000141653284715488 "ENSG00000164736/ENSG00000163508/ENSG00000141448/ENSG00000164690/ENSG00000186895/ENSG00000054598/ENSG00000198719/ENSG00000128918/ENSG00000154342/ENSG00000183023/ENSG00000107831/ENSG00000114251/ENSG00000102678/ENSG00000134853" 14
GO:0060541 "GO:0060541" "respiratory system development" "10/160" "212/20505" 6.67099634709666e-06 0.000208597967296087 0.000160872854310577 "ENSG00000156574/ENSG00000184254/ENSG00000141448/ENSG00000164690/ENSG00000103241/ENSG00000128918/ENSG00000107831/ENSG00000114251/ENSG00000102678/ENSG00000134853" 10
GO:0042475 "GO:0042475" "odontogenesis of dentin-containing tooth" "7/160" "90/20505" 6.70366117122469e-06 0.000208597967296087 0.000160872854310577 "ENSG00000164690/ENSG00000177706/ENSG00000148926/ENSG00000054598/ENSG00000135960/ENSG00000107831/ENSG00000134853" 7
GO:0061138 "GO:0061138" "morphogenesis of a branching epithelium" "10/160" "213/20505" 6.95321336113721e-06 0.000214085779803435 0.000165105110614039 "ENSG00000273706/ENSG00000164690/ENSG00000145536/ENSG00000148926/ENSG00000146374/ENSG00000019549/ENSG00000103241/ENSG00000125931/ENSG00000107831/ENSG00000114251" 10
GO:0042471 "GO:0042471" "ear morphogenesis" "8/160" "127/20505" 7.0429321711782e-06 0.000214589339590586 0.000165493460995996 "ENSG00000188816/ENSG00000184254/ENSG00000133937/ENSG00000196767/ENSG00000154342/ENSG00000107831/ENSG00000114251/ENSG00000102678" 8
GO:0038092 "GO:0038092" "nodal signaling pathway" "4/160" "17/20505" 7.85072118591101e-06 0.000234319994579487 0.000180709940938854 "ENSG00000147869/ENSG00000156574/ENSG00000164690/ENSG00000136698" 4
GO:0048339 "GO:0048339" "paraxial mesoderm development" "4/160" "17/20505" 7.85072118591101e-06 0.000234319994579487 0.000180709940938854 "ENSG00000054598/ENSG00000090932/ENSG00000154342/ENSG00000114251" 4
GO:0007411 "GO:0007411" "axon guidance" "11/160" "267/20505" 8.32413367148179e-06 0.000244752161993963 0.000188755333568353 "ENSG00000273706/ENSG00000165588/ENSG00000164690/ENSG00000165731/ENSG00000182168/ENSG00000121966/ENSG00000154342/ENSG00000187122/ENSG00000076356/ENSG00000107831/ENSG00000114251" 11
GO:0042476 "GO:0042476" "odontogenesis" "8/160" "130/20505" 8.36759528184488e-06 0.000244752161993963 0.000188755333568353 "ENSG00000164093/ENSG00000164690/ENSG00000177706/ENSG00000148926/ENSG00000054598/ENSG00000135960/ENSG00000107831/ENSG00000134853" 8
GO:0030178 "GO:0030178" "negative regulation of Wnt signaling pathway" "9/160" "172/20505" 8.49737659641928e-06 0.000246087391529964 0.000189785076040922 "ENSG00000164736/ENSG00000104371/ENSG00000065717/ENSG00000164690/ENSG00000133937/ENSG00000019549/ENSG00000125931/ENSG00000114251/ENSG00000102678" 9
GO:0097485 "GO:0097485" "neuron projection guidance" "11/160" "268/20505" 8.62269975101205e-06 0.000247268595801081 0.000190696032677181 "ENSG00000273706/ENSG00000165588/ENSG00000164690/ENSG00000165731/ENSG00000182168/ENSG00000121966/ENSG00000154342/ENSG00000187122/ENSG00000076356/ENSG00000107831/ENSG00000114251" 11
GO:0048645 "GO:0048645" "animal organ formation" "6/160" "62/20505" 8.80411172237408e-06 0.000249002214849853 0.00019203301715636 "ENSG00000164736/ENSG00000141448/ENSG00000164690/ENSG00000154342/ENSG00000107831/ENSG00000114251" 6
GO:0046834 "GO:0046834" "lipid phosphorylation" "8/160" "131/20505" 8.85341208355032e-06 0.000249002214849853 0.00019203301715636 "ENSG00000157680/ENSG00000281028/ENSG00000186895/ENSG00000058866/ENSG00000107831/ENSG00000158815/ENSG00000102678/ENSG00000134853" 8
GO:0000578 "GO:0000578" "embryonic axis specification" "5/160" "37/20505" 9.67937338090255e-06 0.000268778943145535 0.000207285029297663 "ENSG00000273706/ENSG00000184344/ENSG00000149922/ENSG00000125931/ENSG00000114251" 5
GO:0030111 "GO:0030111" "regulation of Wnt signaling pathway" "12/160" "325/20505" 9.74036511912023e-06 0.000268778943145535 0.000207285029297663 "ENSG00000164736/ENSG00000104371/ENSG00000065717/ENSG00000152804/ENSG00000164690/ENSG00000133937/ENSG00000146374/ENSG00000019549/ENSG00000125931/ENSG00000154342/ENSG00000114251/ENSG00000102678" 12
GO:0051302 "GO:0051302" "regulation of cell division" "9/160" "177/20505" 1.07045531746304e-05 0.000292624467624243 0.000225674938054432 "ENSG00000164736/ENSG00000164690/ENSG00000105146/ENSG00000099994/ENSG00000186895/ENSG00000198719/ENSG00000163235/ENSG00000107831/ENSG00000102678" 9
GO:0050678 "GO:0050678" "regulation of epithelial cell proliferation" "13/160" "388/20505" 1.16415649825675e-05 0.000315292384944537 0.000243156664304505 "ENSG00000101445/ENSG00000156574/ENSG00000164690/ENSG00000128052/ENSG00000126561/ENSG00000019549/ENSG00000163235/ENSG00000128918/ENSG00000154342/ENSG00000134817/ENSG00000114251/ENSG00000006606/ENSG00000102678" 13
GO:0001763 "GO:0001763" "morphogenesis of a branching structure" "10/160" "227/20505" 1.21350413709618e-05 0.000325642165229938 0.00025113851914989 "ENSG00000273706/ENSG00000164690/ENSG00000145536/ENSG00000148926/ENSG00000146374/ENSG00000019549/ENSG00000103241/ENSG00000125931/ENSG00000107831/ENSG00000114251" 10
GO:0001656 "GO:0001656" "metanephros development" "7/160" "99/20505" 1.25967422938628e-05 0.000334958829177715 0.000258323624265531 "ENSG00000273706/ENSG00000164690/ENSG00000165731/ENSG00000162849/ENSG00000125931/ENSG00000107831/ENSG00000134853" 7
GO:0030324 "GO:0030324" "lung development" "9/160" "184/20505" 1.46056325752429e-05 0.000384878155698968 0.000296821911889479 "ENSG00000156574/ENSG00000141448/ENSG00000164690/ENSG00000103241/ENSG00000128918/ENSG00000107831/ENSG00000114251/ENSG00000102678/ENSG00000134853" 9
GO:0060993 "GO:0060993" "kidney morphogenesis" "7/160" "102/20505" 1.53236447098774e-05 0.0003966518652778 0.000305901915354144 "ENSG00000273706/ENSG00000164690/ENSG00000145536/ENSG00000162849/ENSG00000125931/ENSG00000176928/ENSG00000107831" 7
GO:0072080 "GO:0072080" "nephron tubule development" "7/160" "102/20505" 1.53236447098774e-05 0.0003966518652778 0.000305901915354144 "ENSG00000273706/ENSG00000164690/ENSG00000145536/ENSG00000198719/ENSG00000162849/ENSG00000125931/ENSG00000107831" 7
GO:0021532 "GO:0021532" "neural tube patterning" "5/160" "41/20505" 1.6227390490388e-05 0.000416360677056007 0.000321101549592811 "ENSG00000164736/ENSG00000164690/ENSG00000133937/ENSG00000154342/ENSG00000107831" 5
GO:0021953 "GO:0021953" "central nervous system neuron differentiation" "9/160" "188/20505" 1.73361005741355e-05 0.000434985929046664 0.000335465531604859 "ENSG00000273706/ENSG00000163508/ENSG00000164690/ENSG00000196767/ENSG00000165462/ENSG00000154342/ENSG00000107831/ENSG00000114251/ENSG00000140937" 9
GO:0030323 "GO:0030323" "respiratory tube development" "9/160" "188/20505" 1.73361005741355e-05 0.000434985929046664 0.000335465531604859 "ENSG00000156574/ENSG00000141448/ENSG00000164690/ENSG00000103241/ENSG00000128918/ENSG00000107831/ENSG00000114251/ENSG00000102678/ENSG00000134853" 9
GO:0061326 "GO:0061326" "renal tubule development" "7/160" "104/20505" 1.73994371618666e-05 0.000434985929046664 0.000335465531604859 "ENSG00000273706/ENSG00000164690/ENSG00000145536/ENSG00000198719/ENSG00000162849/ENSG00000125931/ENSG00000107831" 7
GO:0042472 "GO:0042472" "inner ear morphogenesis" "7/160" "107/20505" 2.09446340694085e-05 0.000515786012365108 0.00039777937003992 "ENSG00000188816/ENSG00000184254/ENSG00000196767/ENSG00000154342/ENSG00000107831/ENSG00000114251/ENSG00000102678" 7
GO:0060675 "GO:0060675" "ureteric bud morphogenesis" "6/160" "72/20505" 2.09841146910933e-05 0.000515786012365108 0.00039777937003992 "ENSG00000273706/ENSG00000164690/ENSG00000145536/ENSG00000162849/ENSG00000125931/ENSG00000107831" 6
GO:0072171 "GO:0072171" "mesonephric tubule morphogenesis" "6/160" "73/20505" 2.27170237990452e-05 0.000553727455101727 0.000427040192994332 "ENSG00000273706/ENSG00000164690/ENSG00000145536/ENSG00000162849/ENSG00000125931/ENSG00000107831" 6
GO:0001711 "GO:0001711" "endodermal cell fate commitment" "4/160" "22/20505" 2.34062064341756e-05 0.00056581118859474 0.000436359290025561 "ENSG00000164736/ENSG00000111704/ENSG00000163508/ENSG00000141448" 4
GO:0090287 "GO:0090287" "regulation of cellular response to growth factor stimulus" "11/160" "299/20505" 2.38904220551584e-05 0.000572782659929003 0.000441735758966389 "ENSG00000165588/ENSG00000152804/ENSG00000147869/ENSG00000184344/ENSG00000147596/ENSG00000177706/ENSG00000198719/ENSG00000125931/ENSG00000114251/ENSG00000102678/ENSG00000168675" 11
GO:0021983 "GO:0021983" "pituitary gland development" "5/160" "46/20505" 2.87637763765698e-05 0.000684016633345257 0.00052752052011116 "ENSG00000164093/ENSG00000169297/ENSG00000128918/ENSG00000107831/ENSG00000114251" 5
GO:0007178 "GO:0007178" "transmembrane receptor protein serine/threonine kinase signaling pathway" "12/160" "363/20505" 2.91065473451875e-05 0.000686585895037689 0.00052950196061746 "ENSG00000243709/ENSG00000143768/ENSG00000147869/ENSG00000184344/ENSG00000156574/ENSG00000164690/ENSG00000136698/ENSG00000125931/ENSG00000107831/ENSG00000114251/ENSG00000102678/ENSG00000168675" 12
GO:0090092 "GO:0090092" "regulation of transmembrane receptor protein serine/threonine kinase signaling pathway" "10/160" "253/20505" 3.08336986634098e-05 0.000721508548723789 0.000556434663037366 "ENSG00000243709/ENSG00000143768/ENSG00000147869/ENSG00000184344/ENSG00000156574/ENSG00000164690/ENSG00000125931/ENSG00000114251/ENSG00000102678/ENSG00000168675" 10
GO:0016055 "GO:0016055" "Wnt signaling pathway" "14/160" "491/20505" 3.21300515275716e-05 0.00074587619617577 0.00057522723829228 "ENSG00000164736/ENSG00000104371/ENSG00000065717/ENSG00000152804/ENSG00000164690/ENSG00000133937/ENSG00000146374/ENSG00000104415/ENSG00000019549/ENSG00000125931/ENSG00000154342/ENSG00000107831/ENSG00000114251/ENSG00000102678" 14
GO:0003151 "GO:0003151" "outflow tract morphogenesis" "6/160" "78/20505" 3.31943777358096e-05 0.000758543397478461 0.000584996311577631 "ENSG00000164736/ENSG00000164093/ENSG00000141448/ENSG00000054598/ENSG00000107831/ENSG00000114251" 6
GO:0014032 "GO:0014032" "neural crest cell development" "6/160" "78/20505" 3.31943777358096e-05 0.000758543397478461 0.000584996311577631 "ENSG00000164093/ENSG00000164690/ENSG00000165731/ENSG00000054598/ENSG00000019549/ENSG00000128918" 6
GO:0198738 "GO:0198738" "cell-cell signaling by wnt" "14/160" "493/20505" 3.35846932806908e-05 0.000761513394155198 0.000587286802941822 "ENSG00000164736/ENSG00000104371/ENSG00000065717/ENSG00000152804/ENSG00000164690/ENSG00000133937/ENSG00000146374/ENSG00000104415/ENSG00000019549/ENSG00000125931/ENSG00000154342/ENSG00000107831/ENSG00000114251/ENSG00000102678" 14
GO:0016331 "GO:0016331" "morphogenesis of embryonic epithelium" "8/160" "158/20505" 3.44808680493847e-05 0.000775819531111156 0.000598319839917663 "ENSG00000156574/ENSG00000184254/ENSG00000164690/ENSG00000148926/ENSG00000165731/ENSG00000128918/ENSG00000107831/ENSG00000114251" 8
GO:0072210 "GO:0072210" "metanephric nephron development" "5/160" "48/20505" 3.54821750826128e-05 0.000790078060217277 0.000609316161239991 "ENSG00000273706/ENSG00000165731/ENSG00000162849/ENSG00000125931/ENSG00000134853" 5
GO:0035265 "GO:0035265" "organ growth" "9/160" "206/20505" 3.56548047687797e-05 0.000790078060217277 0.000609316161239991 "ENSG00000147869/ENSG00000141448/ENSG00000164690/ENSG00000165816/ENSG00000054598/ENSG00000198719/ENSG00000107831/ENSG00000102678/ENSG00000162733" 9
GO:0046661 "GO:0046661" "male sex differentiation" "8/160" "160/20505" 3.77199733440159e-05 0.000829555804746214 0.000639761795617143 "ENSG00000171794/ENSG00000141448/ENSG00000164690/ENSG00000169297/ENSG00000107831/ENSG00000114251/ENSG00000102678/ENSG00000134853" 8
GO:0048566 "GO:0048566" "embryonic digestive tract development" "5/160" "49/20505" 3.92668218040365e-05 0.000850781139087458 0.000656130987337624 "ENSG00000164690/ENSG00000103241/ENSG00000128918/ENSG00000102678/ENSG00000134853" 5
GO:0048806 "GO:0048806" "genitalia development" "5/160" "49/20505" 3.92668218040365e-05 0.000850781139087458 0.000656130987337624 "ENSG00000273706/ENSG00000164690/ENSG00000107831/ENSG00000114251/ENSG00000134853" 5
GO:0021871 "GO:0021871" "forebrain regionalization" "4/160" "25/20505" 3.97452049136121e-05 0.000854814149796437 0.000659241285834913 "ENSG00000273706/ENSG00000163508/ENSG00000164690/ENSG00000107831" 4
GO:0030902 "GO:0030902" "hindbrain development" "8/160" "163/20505" 4.30528757344749e-05 0.000918972585434408 0.000708720917889676 "ENSG00000273706/ENSG00000164690/ENSG00000139874/ENSG00000165462/ENSG00000054598/ENSG00000198719/ENSG00000128918/ENSG00000076356" 8
GO:0032924 "GO:0032924" "activin receptor signaling pathway" "5/160" "50/20505" 4.33566553128028e-05 0.000918972585434408 0.000708720917889676 "ENSG00000147869/ENSG00000156574/ENSG00000164690/ENSG00000136698/ENSG00000102678" 5
GO:0014031 "GO:0014031" "mesenchymal cell development" "6/160" "82/20505" 4.41073436194484e-05 0.000921528429192047 0.000710692010349458 "ENSG00000164093/ENSG00000164690/ENSG00000165731/ENSG00000054598/ENSG00000019549/ENSG00000128918" 6
GO:0072078 "GO:0072078" "nephron tubule morphogenesis" "6/160" "82/20505" 4.41073436194484e-05 0.000921528429192047 0.000710692010349458 "ENSG00000273706/ENSG00000164690/ENSG00000145536/ENSG00000162849/ENSG00000125931/ENSG00000107831" 6
GO:0050673 "GO:0050673" "epithelial cell proliferation" "13/160" "442/20505" 4.52488730906611e-05 0.000938673431136056 0.000723914408609831 "ENSG00000101445/ENSG00000156574/ENSG00000164690/ENSG00000128052/ENSG00000126561/ENSG00000019549/ENSG00000163235/ENSG00000128918/ENSG00000154342/ENSG00000134817/ENSG00000114251/ENSG00000006606/ENSG00000102678" 13
GO:0002053 "GO:0002053" "positive regulation of mesenchymal cell proliferation" "4/160" "26/20505" 4.66869776966943e-05 0.000961685984245287 0.000741661921453045 "ENSG00000164690/ENSG00000103241/ENSG00000114251/ENSG00000102678" 4
GO:0048864 "GO:0048864" "stem cell development" "6/160" "83/20505" 4.72404458774333e-05 0.000966281847492953 0.000745206297499739 "ENSG00000164093/ENSG00000164690/ENSG00000165731/ENSG00000054598/ENSG00000019549/ENSG00000128918" 6
GO:0072088 "GO:0072088" "nephron epithelium morphogenesis" "6/160" "84/20505" 5.05492471418326e-05 0.00102678158256847 0.000791864302813941 "ENSG00000273706/ENSG00000164690/ENSG00000145536/ENSG00000162849/ENSG00000125931/ENSG00000107831" 6
GO:0048617 "GO:0048617" "embryonic foregut morphogenesis" "3/160" "10/20505" 5.37461676379105e-05 0.00108418993338544 0.000836138201437692 "ENSG00000164736/ENSG00000164690/ENSG00000103241" 3
GO:0016202 "GO:0016202" "regulation of striated muscle tissue development" "8/160" "169/20505" 5.56189648346742e-05 0.00111428405576316 0.000859347091858016 "ENSG00000164736/ENSG00000141448/ENSG00000164690/ENSG00000186895/ENSG00000198719/ENSG00000154342/ENSG00000107831/ENSG00000102678" 8
GO:0061333 "GO:0061333" "renal tubule morphogenesis" "6/160" "86/20505" 5.77228733316923e-05 0.00114080678712973 0.000879801689543504 "ENSG00000273706/ENSG00000164690/ENSG00000145536/ENSG00000162849/ENSG00000125931/ENSG00000107831" 6
GO:0072028 "GO:0072028" "nephron morphogenesis" "6/160" "86/20505" 5.77228733316923e-05 0.00114080678712973 0.000879801689543504 "ENSG00000273706/ENSG00000164690/ENSG00000145536/ENSG00000162849/ENSG00000125931/ENSG00000107831" 6
GO:0043010 "GO:0043010" "camera-type eye development" "11/160" "330/20505" 5.85365954700633e-05 0.00114912444127473 0.00088621634823275 "ENSG00000273706/ENSG00000164093/ENSG00000184254/ENSG00000164690/ENSG00000165731/ENSG00000054598/ENSG00000198719/ENSG00000128918/ENSG00000197406/ENSG00000114251/ENSG00000134853" 11
GO:0007548 "GO:0007548" "sex differentiation" "10/160" "274/20505" 6.03692328721201e-05 0.00117061603302974 0.000902790880353658 "ENSG00000273706/ENSG00000171794/ENSG00000141448/ENSG00000164690/ENSG00000054598/ENSG00000169297/ENSG00000107831/ENSG00000114251/ENSG00000102678/ENSG00000134853" 10
GO:1901861 "GO:1901861" "regulation of muscle tissue development" "8/160" "171/20505" 6.04318020470052e-05 0.00117061603302974 0.000902790880353658 "ENSG00000164736/ENSG00000141448/ENSG00000164690/ENSG00000186895/ENSG00000198719/ENSG00000154342/ENSG00000107831/ENSG00000102678" 8
GO:0048634 "GO:0048634" "regulation of muscle organ development" "8/160" "173/20505" 6.55863104078012e-05 0.00126210498646591 0.000973348083129626 "ENSG00000164736/ENSG00000141448/ENSG00000164690/ENSG00000186895/ENSG00000198719/ENSG00000154342/ENSG00000107831/ENSG00000102678" 8
GO:0051781 "GO:0051781" "positive regulation of cell division" "6/160" "89/20505" 6.99865554682887e-05 0.00133797826630552 0.00103186232107701 "ENSG00000164690/ENSG00000105146/ENSG00000186895/ENSG00000163235/ENSG00000107831/ENSG00000102678" 6
GO:0007440 "GO:0007440" "foregut morphogenesis" "3/160" "11/20505" 7.34775753739279e-05 0.00138659295463703 0.00106935445858287 "ENSG00000164736/ENSG00000164690/ENSG00000103241" 3
GO:0032525 "GO:0032525" "somite rostral/caudal axis specification" "3/160" "11/20505" 7.34775753739279e-05 0.00138659295463703 0.00106935445858287 "ENSG00000273706/ENSG00000184344/ENSG00000149922" 3
GO:0035051 "GO:0035051" "cardiocyte differentiation" "8/160" "179/20505" 8.3291486246511e-05 0.00156171536712208 0.00120441062770764 "ENSG00000164736/ENSG00000164093/ENSG00000163508/ENSG00000141448/ENSG00000198719/ENSG00000154342/ENSG00000183023/ENSG00000134853" 8
GO:0035272 "GO:0035272" "exocrine system development" "5/160" "58/20505" 8.91734149565908e-05 0.00166135183915942 0.00128125127892708 "ENSG00000164690/ENSG00000054598/ENSG00000019549/ENSG00000135960/ENSG00000107831" 5
GO:0032925 "GO:0032925" "regulation of activin receptor signaling pathway" "4/160" "31/20505" 9.5321963129488e-05 0.00176466292502375 0.00136092582935705 "ENSG00000147869/ENSG00000156574/ENSG00000164690/ENSG00000102678" 4
GO:0003306 "GO:0003306" "Wnt signaling pathway involved in heart development" "3/160" "12/20505" 9.74089917798205e-05 0.00179195786764764 0.00138197596414535 "ENSG00000164736/ENSG00000154342/ENSG00000114251" 3
GO:0001667 "GO:0001667" "ameboidal-type cell migration" "13/160" "480/20505" 0.000103994039224696 0.00190114102957647 0.00146617911880607 "ENSG00000164736/ENSG00000164093/ENSG00000147869/ENSG00000156574/ENSG00000164690/ENSG00000128052/ENSG00000165731/ENSG00000126561/ENSG00000176692/ENSG00000183023/ENSG00000107831/ENSG00000114251/ENSG00000162733" 13
GO:0045785 "GO:0045785" "positive regulation of cell adhesion" "13/160" "483/20505" 0.000110640674632725 0.00201008679068771 0.00155019918756411 "ENSG00000156574/ENSG00000164690/ENSG00000110944/ENSG00000128052/ENSG00000146904/ENSG00000107742/ENSG00000160712/ENSG00000165731/ENSG00000176692/ENSG00000103241/ENSG00000162849/ENSG00000154342/ENSG00000114251" 13
GO:0001649 "GO:0001649" "osteoblast differentiation" "9/160" "239/20505" 0.000111935055649132 0.00201662272221156 0.00155523976381444 "ENSG00000164690/ENSG00000177706/ENSG00000160712/ENSG00000181195/ENSG00000019549/ENSG00000125931/ENSG00000154342/ENSG00000102678/ENSG00000162733" 9
GO:0009953 "GO:0009953" "dorsal/ventral pattern formation" "6/160" "97/20505" 0.00011306876117699 0.00201662272221156 0.00155523976381444 "ENSG00000273706/ENSG00000147869/ENSG00000164690/ENSG00000133937/ENSG00000154342/ENSG00000107831" 6
GO:0098773 "GO:0098773" "skin epidermis development" "6/160" "97/20505" 0.00011306876117699 0.00201662272221156 0.00155523976381444 "ENSG00000104371/ENSG00000125285/ENSG00000164690/ENSG00000135960/ENSG00000198719/ENSG00000114251" 6
GO:0060070 "GO:0060070" "canonical Wnt signaling pathway" "10/160" "297/20505" 0.000117549987288091 0.00208384068374343 0.00160707893306781 "ENSG00000164736/ENSG00000104371/ENSG00000065717/ENSG00000164690/ENSG00000146374/ENSG00000019549/ENSG00000154342/ENSG00000107831/ENSG00000114251/ENSG00000102678" 10
GO:0050920 "GO:0050920" "regulation of chemotaxis" "9/160" "241/20505" 0.000119223102772719 0.00210076852777232 0.00162013385695585 "ENSG00000110944/ENSG00000128052/ENSG00000160712/ENSG00000121966/ENSG00000154342/ENSG00000145824/ENSG00000114251/ENSG00000006606/ENSG00000134853" 9
GO:0048505 "GO:0048505" "regulation of timing of cell differentiation" "3/160" "13/20505" 0.000125906680787593 0.00219212524585541 0.00169058907849506 "ENSG00000156574/ENSG00000198719/ENSG00000102678" 3
GO:2000543 "GO:2000543" "positive regulation of gastrulation" "3/160" "13/20505" 0.000125906680787593 0.00219212524585541 0.00169058907849506 "ENSG00000273706/ENSG00000165588/ENSG00000154342" 3
GO:0060828 "GO:0060828" "regulation of canonical Wnt signaling pathway" "9/160" "243/20505" 0.000126904429084918 0.00219642281108512 0.00169390340410451 "ENSG00000164736/ENSG00000104371/ENSG00000065717/ENSG00000164690/ENSG00000146374/ENSG00000019549/ENSG00000154342/ENSG00000114251/ENSG00000102678" 9
GO:0001837 "GO:0001837" "epithelial to mesenchymal transition" "7/160" "143/20505" 0.000132856190092234 0.00228590797658697 0.00176291526543442 "ENSG00000163508/ENSG00000133937/ENSG00000054598/ENSG00000019549/ENSG00000107831/ENSG00000114251/ENSG00000168675" 7
GO:0010464 "GO:0010464" "regulation of mesenchymal cell proliferation" "4/160" "34/20505" 0.000137959654563454 0.00235983619648013 0.00181992945355175 "ENSG00000164690/ENSG00000103241/ENSG00000114251/ENSG00000102678" 4
GO:0030901 "GO:0030901" "midbrain development" "6/160" "102/20505" 0.000149223319152066 0.00253766400302206 0.00195707204983401 "ENSG00000165588/ENSG00000164690/ENSG00000165462/ENSG00000154342/ENSG00000114251/ENSG00000102678" 6
GO:0007517 "GO:0007517" "muscle organ development" "12/160" "432/20505" 0.000152622262507989 0.00258046310887784 0.00199007915153404 "ENSG00000164736/ENSG00000163508/ENSG00000141448/ENSG00000164690/ENSG00000133937/ENSG00000186895/ENSG00000054598/ENSG00000198719/ENSG00000154342/ENSG00000107831/ENSG00000114251/ENSG00000102678" 12
GO:0001658 "GO:0001658" "branching involved in ureteric bud morphogenesis" "5/160" "65/20505" 0.000153846130845821 0.00258620650990819 0.00199450852028187 "ENSG00000273706/ENSG00000164690/ENSG00000145536/ENSG00000125931/ENSG00000107831" 5
GO:0045844 "GO:0045844" "positive regulation of striated muscle tissue development" "6/160" "103/20505" 0.000157443258026367 0.0026165996007223 0.00201794797817288 "ENSG00000164736/ENSG00000141448/ENSG00000164690/ENSG00000198719/ENSG00000154342/ENSG00000102678" 6
GO:0048636 "GO:0048636" "positive regulation of muscle organ development" "6/160" "103/20505" 0.000157443258026367 0.0026165996007223 0.00201794797817288 "ENSG00000164736/ENSG00000141448/ENSG00000164690/ENSG00000198719/ENSG00000154342/ENSG00000102678" 6
GO:0007501 "GO:0007501" "mesodermal cell fate specification" "3/160" "14/20505" 0.000159327734580867 0.00261816642499459 0.00201915632883973 "ENSG00000164736/ENSG00000156574/ENSG00000154342" 3
GO:0040034 "GO:0040034" "regulation of development, heterochronic" "3/160" "14/20505" 0.000159327734580867 0.00261816642499459 0.00201915632883973 "ENSG00000156574/ENSG00000198719/ENSG00000102678" 3
GO:1901863 "GO:1901863" "positive regulation of muscle tissue development" "6/160" "104/20505" 0.000166017369507868 0.00271285366374588 0.00209218008147815 "ENSG00000164736/ENSG00000141448/ENSG00000164690/ENSG00000198719/ENSG00000154342/ENSG00000102678" 6
GO:0048643 "GO:0048643" "positive regulation of skeletal muscle tissue development" "4/160" "36/20505" 0.0001731183164615 0.00281317264249938 0.00216954708875436 "ENSG00000164736/ENSG00000164690/ENSG00000198719/ENSG00000154342" 4
GO:0007219 "GO:0007219" "Notch signaling pathway" "8/160" "201/20505" 0.000185507007656509 0.00299783423975297 0.00231195997329397 "ENSG00000100060/ENSG00000128652/ENSG00000054598/ENSG00000179111/ENSG00000019549/ENSG00000198719/ENSG00000090932/ENSG00000188290" 8
GO:0010453 "GO:0010453" "regulation of cell fate commitment" "4/160" "37/20505" 0.000192929097440967 0.00310064620887269 0.00239124959986115 "ENSG00000164736/ENSG00000184344/ENSG00000110944/ENSG00000154342" 4
GO:0001714 "GO:0001714" "endodermal cell fate specification" "3/160" "15/20505" 0.00019802021709211 0.00314787573366533 0.00242767348528828 "ENSG00000164736/ENSG00000111704/ENSG00000163508" 3
GO:0048853 "GO:0048853" "forebrain morphogenesis" "3/160" "15/20505" 0.00019802021709211 0.00314787573366533 0.00242767348528828 "ENSG00000187122/ENSG00000107831/ENSG00000114251" 3
GO:0060395 "GO:0060395" "SMAD protein signal transduction" "5/160" "69/20505" 0.000204146072123538 0.00319319390888422 0.00246262331866447 "ENSG00000243709/ENSG00000143768/ENSG00000184344/ENSG00000156574/ENSG00000125931" 5
GO:1903672 "GO:1903672" "positive regulation of sprouting angiogenesis" "5/160" "69/20505" 0.000204146072123538 0.00319319390888422 0.00246262331866447 "ENSG00000101445/ENSG00000128052/ENSG00000176692/ENSG00000198719/ENSG00000134817" 5
GO:2000736 "GO:2000736" "regulation of stem cell differentiation" "5/160" "69/20505" 0.000204146072123538 0.00319319390888422 0.00246262331866447 "ENSG00000141448/ENSG00000054598/ENSG00000154342/ENSG00000135363/ENSG00000134853" 5
GO:0003156 "GO:0003156" "regulation of animal organ formation" "4/160" "38/20505" 0.000214323574875517 0.00330351854926116 0.00254770679300644 "ENSG00000164690/ENSG00000154342/ENSG00000107831/ENSG00000114251" 4
GO:0040036 "GO:0040036" "regulation of fibroblast growth factor receptor signaling pathway" "4/160" "38/20505" 0.000214323574875517 0.00330351854926116 0.00254770679300644 "ENSG00000165588/ENSG00000147596/ENSG00000177706/ENSG00000114251" 4
GO:0055024 "GO:0055024" "regulation of cardiac muscle tissue development" "6/160" "109/20505" 0.000214587529695596 0.00330351854926116 0.00254770679300644 "ENSG00000141448/ENSG00000186895/ENSG00000198719/ENSG00000154342/ENSG00000107831/ENSG00000102678" 6
GO:0060393 "GO:0060393" "regulation of pathway-restricted SMAD protein phosphorylation" "5/160" "70/20505" 0.000218477505325129 0.00333011844129438 0.00256822089777557 "ENSG00000243709/ENSG00000143768/ENSG00000184344/ENSG00000156574/ENSG00000168675" 5
GO:0035148 "GO:0035148" "tube formation" "7/160" "155/20505" 0.000218592389992657 0.00333011844129438 0.00256822089777557 "ENSG00000156574/ENSG00000164690/ENSG00000148926/ENSG00000165731/ENSG00000135960/ENSG00000107831/ENSG00000114251" 7
GO:0001938 "GO:0001938" "positive regulation of endothelial cell proliferation" "6/160" "113/20505" 0.000260977237024192 0.00391228674459213 0.00301719495948212 "ENSG00000101445/ENSG00000128052/ENSG00000126561/ENSG00000134817/ENSG00000114251/ENSG00000006606" 6
GO:0090100 "GO:0090100" "positive regulation of transmembrane receptor protein serine/threonine kinase signaling pathway" "6/160" "113/20505" 0.000260977237024192 0.00391228674459213 0.00301719495948212 "ENSG00000243709/ENSG00000143768/ENSG00000184344/ENSG00000156574/ENSG00000125931/ENSG00000102678" 6
GO:0001825 "GO:0001825" "blastocyst formation" "4/160" "40/20505" 0.000262156650235917 0.00391228674459213 0.00301719495948212 "ENSG00000164736/ENSG00000156574/ENSG00000163508/ENSG00000147596" 4
GO:0040019 "GO:0040019" "positive regulation of embryonic development" "4/160" "40/20505" 0.000262156650235917 0.00391228674459213 0.00301719495948212 "ENSG00000273706/ENSG00000165588/ENSG00000164690/ENSG00000154342" 4
GO:0060389 "GO:0060389" "pathway-restricted SMAD protein phosphorylation" "5/160" "73/20505" 0.000266096051792082 0.00395091853549157 0.00304698818589597 "ENSG00000243709/ENSG00000143768/ENSG00000184344/ENSG00000156574/ENSG00000168675" 5
GO:0046854 "GO:0046854" "phosphatidylinositol phosphorylation" "6/160" "115/20505" 0.000286949939923614 0.00423903320341703 0.00326918512097983 "ENSG00000281028/ENSG00000186895/ENSG00000107831/ENSG00000158815/ENSG00000102678/ENSG00000134853" 6
GO:0048333 "GO:0048333" "mesodermal cell differentiation" "4/160" "41/20505" 0.000288743597235433 0.00424409558750573 0.00327308928260001 "ENSG00000164736/ENSG00000156574/ENSG00000103241/ENSG00000154342" 4
GO:0072224 "GO:0072224" "metanephric glomerulus development" "3/160" "17/20505" 0.000292567430912139 0.00427879867709003 0.00329985265497218 "ENSG00000273706/ENSG00000165731/ENSG00000134853" 3
GO:0002244 "GO:0002244" "hematopoietic progenitor cell differentiation" "6/160" "116/20505" 0.000300675097250148 0.00437549581819245 0.00337442646455652 "ENSG00000164690/ENSG00000163694/ENSG00000100678/ENSG00000054598/ENSG00000135363/ENSG00000134853" 6
GO:0048592 "GO:0048592" "eye morphogenesis" "7/160" "165/20505" 0.000320054410118032 0.00463445123562002 0.00357413549183399 "ENSG00000273706/ENSG00000164093/ENSG00000184254/ENSG00000198719/ENSG00000197406/ENSG00000114251/ENSG00000204262" 7
GO:0002065 "GO:0002065" "columnar/cuboidal epithelial cell differentiation" "6/160" "118/20505" 0.0003296684083616 0.00472757669992693 0.00364595478828373 "ENSG00000156574/ENSG00000141448/ENSG00000177706/ENSG00000198719/ENSG00000107831/ENSG00000114251" 6
GO:0007409 "GO:0007409" "axonogenesis" "12/160" "470/20505" 0.000329840621726372 0.00472757669992693 0.00364595478828373 "ENSG00000273706/ENSG00000165588/ENSG00000164690/ENSG00000165731/ENSG00000182168/ENSG00000121966/ENSG00000154342/ENSG00000187122/ENSG00000076356/ENSG00000107831/ENSG00000114251/ENSG00000140937" 12
GO:0008406 "GO:0008406" "gonad development" "8/160" "219/20505" 0.000331334435379494 0.00472757669992693 0.00364595478828373 "ENSG00000171794/ENSG00000141448/ENSG00000054598/ENSG00000169297/ENSG00000107831/ENSG00000114251/ENSG00000102678/ENSG00000134853" 8
GO:0021537 "GO:0021537" "telencephalon development" "9/160" "277/20505" 0.000335756834788246 0.00476742107648359 0.00367668317297502 "ENSG00000273706/ENSG00000184254/ENSG00000163508/ENSG00000164690/ENSG00000100678/ENSG00000154342/ENSG00000183023/ENSG00000107831/ENSG00000114251" 9
GO:0019827 "GO:0019827" "stem cell population maintenance" "7/160" "167/20505" 0.000344275114719886 0.00486210791988082 0.00374970662071241 "ENSG00000156574/ENSG00000111704/ENSG00000187140/ENSG00000163508/ENSG00000147596/ENSG00000146904/ENSG00000198719" 7
GO:0007435 "GO:0007435" "salivary gland morphogenesis" "4/160" "43/20505" 0.000347634149881875 0.00486210791988082 0.00374970662071241 "ENSG00000164690/ENSG00000019549/ENSG00000135960/ENSG00000107831" 4
GO:0032816 "GO:0032816" "positive regulation of natural killer cell activation" "3/160" "18/20505" 0.000349074414760674 0.00486210791988082 0.00374970662071241 "ENSG00000110944/ENSG00000198846/ENSG00000160712" 3
GO:0036342 "GO:0036342" "post-anal tail morphogenesis" "3/160" "18/20505" 0.000349074414760674 0.00486210791988082 0.00374970662071241 "ENSG00000179111/ENSG00000154342/ENSG00000114251" 3
GO:0098727 "GO:0098727" "maintenance of cell number" "7/160" "170/20505" 0.000383341134191551 0.00530588631881515 0.00409195299369172 "ENSG00000156574/ENSG00000111704/ENSG00000187140/ENSG00000163508/ENSG00000147596/ENSG00000146904/ENSG00000198719" 7
GO:0051145 "GO:0051145" "smooth muscle cell differentiation" "5/160" "79/20505" 0.000384563384474807 0.00530588631881515 0.00409195299369172 "ENSG00000141448/ENSG00000164690/ENSG00000148926/ENSG00000103241/ENSG00000102678" 5
GO:0045137 "GO:0045137" "development of primary sexual characteristics" "8/160" "225/20505" 0.000396866478052516 0.00540273144206881 0.00416664092860224 "ENSG00000171794/ENSG00000141448/ENSG00000054598/ENSG00000169297/ENSG00000107831/ENSG00000114251/ENSG00000102678/ENSG00000134853" 8
GO:0071772 "GO:0071772" "response to BMP" "7/160" "171/20505" 0.000397123849587964 0.00540273144206881 0.00416664092860224 "ENSG00000147869/ENSG00000184344/ENSG00000156574/ENSG00000141448/ENSG00000136698/ENSG00000107831/ENSG00000114251" 7
GO:0071773 "GO:0071773" "cellular response to BMP stimulus" "7/160" "171/20505" 0.000397123849587964 0.00540273144206881 0.00416664092860224 "ENSG00000147869/ENSG00000184344/ENSG00000156574/ENSG00000141448/ENSG00000136698/ENSG00000107831/ENSG00000114251" 7
GO:0048557 "GO:0048557" "embryonic digestive tract morphogenesis" "3/160" "19/20505" 0.000412157606752953 0.00553819827508689 0.0042711143152537 "ENSG00000164690/ENSG00000103241/ENSG00000134853" 3
GO:0010463 "GO:0010463" "mesenchymal cell proliferation" "4/160" "45/20505" 0.000414654845211634 0.00553819827508689 0.0042711143152537 "ENSG00000164690/ENSG00000103241/ENSG00000114251/ENSG00000102678" 4
GO:0038084 "GO:0038084" "vascular endothelial growth factor signaling pathway" "4/160" "45/20505" 0.000414654845211634 0.00553819827508689 0.0042711143152537 "ENSG00000128052/ENSG00000054598/ENSG00000198719/ENSG00000134853" 4
GO:0110111 "GO:0110111" "negative regulation of animal organ morphogenesis" "4/160" "45/20505" 0.000414654845211634 0.00553819827508689 0.0042711143152537 "ENSG00000054598/ENSG00000125931/ENSG00000197406/ENSG00000114251" 4
GO:0007431 "GO:0007431" "salivary gland development" "4/160" "46/20505" 0.000451406375576878 0.00597449614734103 0.00460759163067992 "ENSG00000164690/ENSG00000019549/ENSG00000135960/ENSG00000107831" 4
GO:0031018 "GO:0031018" "endocrine pancreas development" "4/160" "46/20505" 0.000451406375576878 0.00597449614734103 0.00460759163067992 "ENSG00000141448/ENSG00000160712/ENSG00000198719/ENSG00000114251" 4
GO:0048593 "GO:0048593" "camera-type eye morphogenesis" "6/160" "126/20505" 0.000468217782028321 0.00616908564158936 0.00475766100942006 "ENSG00000273706/ENSG00000164093/ENSG00000184254/ENSG00000198719/ENSG00000197406/ENSG00000114251" 6
GO:0002067 "GO:0002067" "glandular epithelial cell differentiation" "4/160" "48/20505" 0.000531780367263164 0.00697514607284643 0.00537930293625188 "ENSG00000141448/ENSG00000198719/ENSG00000107831/ENSG00000114251" 4
GO:0048754 "GO:0048754" "branching morphogenesis of an epithelial tube" "7/160" "180/20505" 0.000539884569491941 0.00704983199001753 0.00543690146814488 "ENSG00000273706/ENSG00000164690/ENSG00000145536/ENSG00000103241/ENSG00000125931/ENSG00000107831/ENSG00000114251" 7
GO:0030903 "GO:0030903" "notochord development" "3/160" "21/20505" 0.000559264456865633 0.00727043793925323 0.00560703499912539 "ENSG00000184344/ENSG00000114251/ENSG00000204262" 3
GO:2000177 "GO:2000177" "regulation of neural precursor cell proliferation" "5/160" "86/20505" 0.000568821744241325 0.00736196284029148 0.0056776199250543 "ENSG00000273706/ENSG00000164690/ENSG00000189431/ENSG00000154342/ENSG00000114251" 5
GO:0030177 "GO:0030177" "positive regulation of Wnt signaling pathway" "6/160" "132/20505" 0.000599059374642332 0.00771915714021507 0.00595309176841417 "ENSG00000152804/ENSG00000164690/ENSG00000146374/ENSG00000154342/ENSG00000114251/ENSG00000102678" 6
GO:0051480 "GO:0051480" "regulation of cytosolic calcium ion concentration" "10/160" "365/20505" 0.000605860873599455 0.007772557259993 0.0059942744788718 "ENSG00000103888/ENSG00000139679/ENSG00000148926/ENSG00000121966/ENSG00000100678/ENSG00000134817/ENSG00000183023/ENSG00000183454/ENSG00000114251/ENSG00000134853" 10
GO:0060324 "GO:0060324" "face development" "4/160" "50/20505" 0.000621837844192096 0.00794268862123092 0.00612548149898258 "ENSG00000184254/ENSG00000128918/ENSG00000114251/ENSG00000134853" 4
GO:0001936 "GO:0001936" "regulation of endothelial cell proliferation" "7/160" "185/20505" 0.000635264589322323 0.0080789083642078 0.00623053553738095 "ENSG00000101445/ENSG00000128052/ENSG00000126561/ENSG00000128918/ENSG00000134817/ENSG00000114251/ENSG00000006606" 7
GO:0072283 "GO:0072283" "metanephric renal vesicle morphogenesis" "3/160" "22/20505" 0.000643873654302179 0.00815294562265747 0.00628763381713178 "ENSG00000273706/ENSG00000162849/ENSG00000125931" 3
GO:0048705 "GO:0048705" "skeletal system morphogenesis" "8/160" "244/20505" 0.000677134256044282 0.00853714525400658 0.00658393244420552 "ENSG00000273706/ENSG00000147869/ENSG00000156574/ENSG00000133937/ENSG00000128652/ENSG00000165816/ENSG00000054598/ENSG00000134853" 8
GO:0030258 "GO:0030258" "lipid modification" "9/160" "306/20505" 0.000688204610894403 0.00863947848440398 0.00666285286264606 "ENSG00000157680/ENSG00000281028/ENSG00000186895/ENSG00000160179/ENSG00000058866/ENSG00000107831/ENSG00000158815/ENSG00000102678/ENSG00000134853" 9
GO:0007224 "GO:0007224" "smoothened signaling pathway" "6/160" "136/20505" 0.000700939548286353 0.00876174435357941 0.00675714553296291 "ENSG00000165588/ENSG00000164690/ENSG00000165186/ENSG00000103241/ENSG00000140323/ENSG00000102678" 6
GO:0008584 "GO:0008584" "male gonad development" "6/160" "137/20505" 0.000728387953494354 0.0089728079879073 0.00691991993453364 "ENSG00000171794/ENSG00000141448/ENSG00000169297/ENSG00000114251/ENSG00000102678/ENSG00000134853" 6
GO:0034754 "GO:0034754" "cellular hormone metabolic process" "6/160" "137/20505" 0.000728387953494354 0.0089728079879073 0.00691991993453364 "ENSG00000184254/ENSG00000164690/ENSG00000121207/ENSG00000148926/ENSG00000128918/ENSG00000134853" 6
GO:0090090 "GO:0090090" "negative regulation of canonical Wnt signaling pathway" "6/160" "137/20505" 0.000728387953494354 0.0089728079879073 0.00691991993453364 "ENSG00000164736/ENSG00000104371/ENSG00000065717/ENSG00000164690/ENSG00000019549/ENSG00000114251" 6
GO:0010002 "GO:0010002" "cardioblast differentiation" "3/160" "23/20505" 0.000736230399007778 0.0089728079879073 0.00691991993453364 "ENSG00000163508/ENSG00000141448/ENSG00000154342" 3
GO:0030539 "GO:0030539" "male genitalia development" "3/160" "23/20505" 0.000736230399007778 0.0089728079879073 0.00691991993453364 "ENSG00000164690/ENSG00000107831/ENSG00000134853" 3
GO:0045683 "GO:0045683" "negative regulation of epidermis development" "3/160" "23/20505" 0.000736230399007778 0.0089728079879073 0.00691991993453364 "ENSG00000104371/ENSG00000184344/ENSG00000198719" 3
GO:0048736 "GO:0048736" "appendage development" "7/160" "190/20505" 0.000743564346103814 0.0089872963320399 0.00693109349152011 "ENSG00000164093/ENSG00000164690/ENSG00000128918/ENSG00000076356/ENSG00000107831/ENSG00000114251/ENSG00000102678" 7
GO:0060173 "GO:0060173" "limb development" "7/160" "190/20505" 0.000743564346103814 0.0089872963320399 0.00693109349152011 "ENSG00000164093/ENSG00000164690/ENSG00000128918/ENSG00000076356/ENSG00000107831/ENSG00000114251/ENSG00000102678" 7
GO:0046546 "GO:0046546" "development of primary male sexual characteristics" "6/160" "138/20505" 0.000756660675788169 0.00910795257893166 0.00702414480491248 "ENSG00000171794/ENSG00000141448/ENSG00000169297/ENSG00000114251/ENSG00000102678/ENSG00000134853" 6
GO:0001892 "GO:0001892" "embryonic placenta development" "5/160" "92/20505" 0.000773694607586987 0.00923231106265929 0.00712005132065816 "ENSG00000156574/ENSG00000163508/ENSG00000148926/ENSG00000146374/ENSG00000125931" 5
GO:0045778 "GO:0045778" "positive regulation of ossification" "5/160" "92/20505" 0.000773694607586987 0.00923231106265929 0.00712005132065816 "ENSG00000177706/ENSG00000160712/ENSG00000183023/ENSG00000114251/ENSG00000162733" 5
GO:2000179 "GO:2000179" "positive regulation of neural precursor cell proliferation" "4/160" "53/20505" 0.000776461032962115 0.00923231106265929 0.00712005132065816 "ENSG00000273706/ENSG00000164690/ENSG00000189431/ENSG00000154342" 4
GO:0022612 "GO:0022612" "gland morphogenesis" "6/160" "139/20505" 0.000785774468492803 0.00930522396899372 0.00717628248872822 "ENSG00000164690/ENSG00000019549/ENSG00000135960/ENSG00000154342/ENSG00000107831/ENSG00000114251" 6
GO:0010862 "GO:0010862" "positive regulation of pathway-restricted SMAD protein phosphorylation" "4/160" "54/20505" 0.000833529092003654 0.00967224273579409 0.00745933105993945 "ENSG00000243709/ENSG00000143768/ENSG00000184344/ENSG00000156574" 4
GO:0021515 "GO:0021515" "cell differentiation in spinal cord" "4/160" "54/20505" 0.000833529092003654 0.00967224273579409 0.00745933105993945 "ENSG00000273706/ENSG00000164690/ENSG00000165462/ENSG00000154342" 4
GO:0036092 "GO:0036092" "phosphatidylinositol-3-phosphate biosynthetic process" "4/160" "54/20505" 0.000833529092003654 0.00967224273579409 0.00745933105993945 "ENSG00000186895/ENSG00000107831/ENSG00000158815/ENSG00000102678" 4
GO:0008045 "GO:0008045" "motor neuron axon guidance" "3/160" "24/20505" 0.000836607662275523 0.00967224273579409 0.00745933105993945 "ENSG00000273706/ENSG00000187122/ENSG00000107831" 3
GO:0021904 "GO:0021904" "dorsal/ventral neural tube patterning" "3/160" "24/20505" 0.000836607662275523 0.00967224273579409 0.00745933105993945 "ENSG00000164690/ENSG00000133937/ENSG00000154342" 3
GO:0030878 "GO:0030878" "thyroid gland development" "3/160" "24/20505" 0.000836607662275523 0.00967224273579409 0.00745933105993945 "ENSG00000164690/ENSG00000128652/ENSG00000107831" 3
GO:0001942 "GO:0001942" "hair follicle development" "5/160" "94/20505" 0.000852885006423697 0.0098216088338162 0.00757452369981759 "ENSG00000104371/ENSG00000125285/ENSG00000164690/ENSG00000135960/ENSG00000114251" 5
GO:0045682 "GO:0045682" "regulation of epidermis development" "5/160" "95/20505" 0.000894671588571271 0.0102624093983175 0.00791447353687609 "ENSG00000104371/ENSG00000184344/ENSG00000054598/ENSG00000198719/ENSG00000114251" 5
GO:0043062 "GO:0043062" "extracellular structure organization" "11/160" "456/20505" 0.000930422022789637 0.0106307985025769 0.00819857892614389 "ENSG00000128052/ENSG00000107742/ENSG00000160179/ENSG00000145681/ENSG00000054598/ENSG00000105855/ENSG00000103241/ENSG00000154342/ENSG00000204262/ENSG00000162733/ENSG00000134853" 11
GO:0007204 "GO:0007204" "positive regulation of cytosolic calcium ion concentration" "9/160" "320/20505" 0.000943750205862905 0.0106342956522344 0.00820127596319865 "ENSG00000103888/ENSG00000139679/ENSG00000148926/ENSG00000121966/ENSG00000100678/ENSG00000134817/ENSG00000183023/ENSG00000183454/ENSG00000134853" 9
GO:0001710 "GO:0001710" "mesodermal cell fate commitment" "3/160" "25/20505" 0.000945270724643055 0.0106342956522344 0.00820127596319865 "ENSG00000164736/ENSG00000156574/ENSG00000154342" 3
GO:0060571 "GO:0060571" "morphogenesis of an epithelial fold" "3/160" "25/20505" 0.000945270724643055 0.0106342956522344 0.00820127596319865 "ENSG00000156574/ENSG00000164690/ENSG00000114251" 3
GO:0072077 "GO:0072077" "renal vesicle morphogenesis" "3/160" "25/20505" 0.000945270724643055 0.0106342956522344 0.00820127596319865 "ENSG00000273706/ENSG00000162849/ENSG00000125931" 3
GO:0022404 "GO:0022404" "molting cycle process" "5/160" "97/20505" 0.000982794898170328 0.0109303234872555 0.00842957561248354 "ENSG00000104371/ENSG00000125285/ENSG00000164690/ENSG00000135960/ENSG00000114251" 5
GO:0022405 "GO:0022405" "hair cycle process" "5/160" "97/20505" 0.000982794898170328 0.0109303234872555 0.00842957561248354 "ENSG00000104371/ENSG00000125285/ENSG00000164690/ENSG00000135960/ENSG00000114251" 5
GO:0048704 "GO:0048704" "embryonic skeletal system morphogenesis" "5/160" "97/20505" 0.000982794898170328 0.0109303234872555 0.00842957561248354 "ENSG00000273706/ENSG00000156574/ENSG00000133937/ENSG00000128652/ENSG00000134853" 5
GO:0001935 "GO:0001935" "endothelial cell proliferation" "7/160" "200/20505" 0.00100381280613776 0.0111217896134582 0.00857723621831429 "ENSG00000101445/ENSG00000128052/ENSG00000126561/ENSG00000128918/ENSG00000134817/ENSG00000114251/ENSG00000006606" 7
GO:0042445 "GO:0042445" "hormone metabolic process" "8/160" "260/20505" 0.0010212054838901 0.0112717963787869 0.00869292294727501 "ENSG00000184254/ENSG00000164690/ENSG00000121207/ENSG00000148926/ENSG00000128918/ENSG00000197406/ENSG00000176928/ENSG00000134853" 8
GO:0060021 "GO:0060021" "roof of mouth development" "5/160" "98/20505" 0.00102919922688742 0.0113173223257357 0.00872803301630287 "ENSG00000164690/ENSG00000019549/ENSG00000154342/ENSG00000114251/ENSG00000134853" 5
GO:0003309 "GO:0003309" "type B pancreatic cell differentiation" "3/160" "26/20505" 0.00106247730033171 0.0115101707535935 0.00887675966709887 "ENSG00000141448/ENSG00000198719/ENSG00000114251" 3
GO:0045980 "GO:0045980" "negative regulation of nucleotide metabolic process" "3/160" "26/20505" 0.00106247730033171 0.0115101707535935 0.00887675966709887 "ENSG00000158825/ENSG00000165140/ENSG00000009950" 3
GO:0045992 "GO:0045992" "negative regulation of embryonic development" "3/160" "26/20505" 0.00106247730033171 0.0115101707535935 0.00887675966709887 "ENSG00000164736/ENSG00000114251/ENSG00000204262" 3
GO:0072087 "GO:0072087" "renal vesicle development" "3/160" "26/20505" 0.00106247730033171 0.0115101707535935 0.00887675966709887 "ENSG00000273706/ENSG00000162849/ENSG00000125931" 3
GO:0030857 "GO:0030857" "negative regulation of epithelial cell differentiation" "4/160" "58/20505" 0.00109155789812505 0.0117382604853521 0.00905266476657113 "ENSG00000184344/ENSG00000156574/ENSG00000198719/ENSG00000125931" 4
GO:0060425 "GO:0060425" "lung morphogenesis" "4/160" "58/20505" 0.00109155789812505 0.0117382604853521 0.00905266476657113 "ENSG00000156574/ENSG00000164690/ENSG00000103241/ENSG00000107831" 4
GO:0030198 "GO:0030198" "extracellular matrix organization" "10/160" "395/20505" 0.00110501416837081 0.0118394375182587 0.00913069351385635 "ENSG00000128052/ENSG00000107742/ENSG00000145681/ENSG00000054598/ENSG00000105855/ENSG00000103241/ENSG00000154342/ENSG00000204262/ENSG00000162733/ENSG00000134853" 10
GO:0060563 "GO:0060563" "neuroepithelial cell differentiation" "4/160" "59/20505" 0.00116390239337609 0.012379689093182 0.00954734097226777 "ENSG00000156574/ENSG00000177706/ENSG00000198719/ENSG00000107831" 4
GO:0090183 "GO:0090183" "regulation of kidney development" "4/160" "59/20505" 0.00116390239337609 0.012379689093182 0.00954734097226777 "ENSG00000273706/ENSG00000164690/ENSG00000165731/ENSG00000125931" 4
GO:0048641 "GO:0048641" "regulation of skeletal muscle tissue development" "4/160" "60/20505" 0.00123954093838486 0.0131364392926656 0.0101309543514827 "ENSG00000164736/ENSG00000164690/ENSG00000198719/ENSG00000154342" 4
GO:0001890 "GO:0001890" "placenta development" "6/160" "153/20505" 0.00129140690673427 0.0136366974808582 0.010516758507055 "ENSG00000156574/ENSG00000163508/ENSG00000148926/ENSG00000146374/ENSG00000105855/ENSG00000125931" 6
GO:0032835 "GO:0032835" "glomerulus development" "4/160" "61/20505" 0.0013185529443924 0.0138260023233181 0.0106627523090853 "ENSG00000273706/ENSG00000165731/ENSG00000054598/ENSG00000134853" 4
GO:0032693 "GO:0032693" "negative regulation of interleukin-10 production" "3/160" "28/20505" 0.00132351475231763 0.0138260023233181 0.0106627523090853 "ENSG00000131203/ENSG00000110944/ENSG00000198719" 3
GO:0035883 "GO:0035883" "enteroendocrine cell differentiation" "3/160" "28/20505" 0.00132351475231763 0.0138260023233181 0.0106627523090853 "ENSG00000141448/ENSG00000198719/ENSG00000114251" 3
GO:0050921 "GO:0050921" "positive regulation of chemotaxis" "6/160" "154/20505" 0.00133524456371045 0.013898898038623 0.0107189702192601 "ENSG00000110944/ENSG00000128052/ENSG00000160712/ENSG00000145824/ENSG00000114251/ENSG00000006606" 6
GO:1901862 "GO:1901862" "negative regulation of muscle tissue development" "4/160" "62/20505" 0.00140101768427962 0.0145318323635386 0.0112070955483808 "ENSG00000164690/ENSG00000186895/ENSG00000198719/ENSG00000107831" 4
GO:1905330 "GO:1905330" "regulation of morphogenesis of an epithelium" "6/160" "156/20505" 0.00142632351945916 0.0147420363760354 0.0113692070009335 "ENSG00000273706/ENSG00000164690/ENSG00000146374/ENSG00000019549/ENSG00000125931/ENSG00000114251" 6
GO:0061311 "GO:0061311" "cell surface receptor signaling pathway involved in heart development" "3/160" "29/20505" 0.00146782432291542 0.0151175568469281 0.0116588121720079 "ENSG00000164736/ENSG00000154342/ENSG00000114251" 3
GO:0030509 "GO:0030509" "BMP signaling pathway" "6/160" "157/20505" 0.00147360300279751 0.0151238202918692 0.0116636426038599 "ENSG00000147869/ENSG00000184344/ENSG00000156574/ENSG00000136698/ENSG00000107831/ENSG00000114251" 6
GO:0030278 "GO:0030278" "regulation of ossification" "7/160" "215/20505" 0.0015230970416713 0.0155250813137744 0.0119730991472492 "ENSG00000177706/ENSG00000160712/ENSG00000019549/ENSG00000125931/ENSG00000183023/ENSG00000114251/ENSG00000162733" 7
GO:0021510 "GO:0021510" "spinal cord development" "5/160" "107/20505" 0.00152331567078744 0.0155250813137744 0.0119730991472492 "ENSG00000273706/ENSG00000164690/ENSG00000165462/ENSG00000198719/ENSG00000154342" 5
GO:0018958 "GO:0018958" "phenol-containing compound metabolic process" "5/160" "108/20505" 0.0015873564430104 0.0161215888743244 0.0124331317886377 "ENSG00000125931/ENSG00000197406/ENSG00000176928/ENSG00000183454/ENSG00000114251" 5
GO:0051216 "GO:0051216" "cartilage development" "7/160" "217/20505" 0.0016057409166739 0.0162518760597618 0.0125336105788824 "ENSG00000147869/ENSG00000128652/ENSG00000165816/ENSG00000019549/ENSG00000105855/ENSG00000114251/ENSG00000102678" 7
GO:0035107 "GO:0035107" "appendage morphogenesis" "6/160" "161/20505" 0.00167477170683678 0.0168340455068645 0.0129825855227029 "ENSG00000164690/ENSG00000128918/ENSG00000076356/ENSG00000107831/ENSG00000114251/ENSG00000102678" 6
GO:0035108 "GO:0035108" "limb morphogenesis" "6/160" "161/20505" 0.00167477170683678 0.0168340455068645 0.0129825855227029 "ENSG00000164690/ENSG00000128918/ENSG00000076356/ENSG00000107831/ENSG00000114251/ENSG00000102678" 6
GO:0060445 "GO:0060445" "branching involved in salivary gland morphogenesis" "3/160" "31/20505" 0.00178516857638592 0.0178822537189343 0.0137909742580931 "ENSG00000164690/ENSG00000019549/ENSG00000107831" 3
GO:0033627 "GO:0033627" "cell adhesion mediated by integrin" "4/160" "67/20505" 0.00186789355447242 0.0186470602280949 0.0143808007445101 "ENSG00000165731/ENSG00000176692/ENSG00000019549/ENSG00000105855" 4
GO:0032103 "GO:0032103" "positive regulation of response to external stimulus" "9/160" "354/20505" 0.00189369475891082 0.0188403305095719 0.014529852733068 "ENSG00000131203/ENSG00000110944/ENSG00000128052/ENSG00000142405/ENSG00000160712/ENSG00000074660/ENSG00000145824/ENSG00000114251/ENSG00000006606" 9
GO:0071229 "GO:0071229" "cellular response to acid chemical" "7/160" "224/20505" 0.00192283384516313 0.0190653864308548 0.0147034181273313 "ENSG00000128052/ENSG00000165731/ENSG00000128918/ENSG00000154342/ENSG00000114251/ENSG00000204262/ENSG00000134853" 7
GO:0048638 "GO:0048638" "regulation of developmental growth" "9/160" "355/20505" 0.00193024376448698 0.0190741993619068 0.0147102147485619 "ENSG00000141448/ENSG00000126561/ENSG00000054598/ENSG00000198719/ENSG00000197406/ENSG00000154342/ENSG00000107831/ENSG00000114251/ENSG00000102678" 9
GO:0071695 "GO:0071695" "anatomical structure maturation" "6/160" "166/20505" 0.00195481955781915 0.0192520107967038 0.0148473447187895 "ENSG00000177706/ENSG00000165731/ENSG00000074660/ENSG00000149922/ENSG00000128918/ENSG00000114251" 6
GO:0021872 "GO:0021872" "forebrain generation of neurons" "4/160" "68/20505" 0.00197272800997209 0.0193631860039207 0.0149330841588492 "ENSG00000196767/ENSG00000154342/ENSG00000107831/ENSG00000114251" 4
GO:0001101 "GO:0001101" "response to acid chemical" "9/160" "357/20505" 0.00200503524523361 0.0196144752251114 0.0151268809383405 "ENSG00000128052/ENSG00000121207/ENSG00000165731/ENSG00000128918/ENSG00000154342/ENSG00000114251/ENSG00000204262/ENSG00000188828/ENSG00000134853" 9
GO:0090288 "GO:0090288" "negative regulation of cellular response to growth factor stimulus" "6/160" "169/20505" 0.00213905270348549 0.0207486791127036 0.0160015904052268 "ENSG00000152804/ENSG00000147869/ENSG00000184344/ENSG00000147596/ENSG00000114251/ENSG00000168675" 6
GO:0003401 "GO:0003401" "axis elongation" "3/160" "33/20505" 0.00214225678360222 0.0207486791127036 0.0160015904052268 "ENSG00000164690/ENSG00000154342/ENSG00000114251" 3
GO:0072273 "GO:0072273" "metanephric nephron morphogenesis" "3/160" "33/20505" 0.00214225678360222 0.0207486791127036 0.0160015904052268 "ENSG00000273706/ENSG00000162849/ENSG00000125931" 3
GO:0035019 "GO:0035019" "somatic stem cell population maintenance" "4/160" "70/20505" 0.00219447814372635 0.0211146334552618 0.0162838180817368 "ENSG00000111704/ENSG00000187140/ENSG00000147596/ENSG00000146904" 4
GO:0035924 "GO:0035924" "cellular response to vascular endothelial growth factor stimulus" "4/160" "70/20505" 0.00219447814372635 0.0211146334552618 0.0162838180817368 "ENSG00000128052/ENSG00000054598/ENSG00000198719/ENSG00000134853" 4
GO:0070374 "GO:0070374" "positive regulation of ERK1 and ERK2 cascade" "8/160" "294/20505" 0.0022151327626815 0.021243486330634 0.0163831907176064 "ENSG00000156574/ENSG00000128052/ENSG00000146904/ENSG00000165731/ENSG00000107831/ENSG00000006606/ENSG00000162733/ENSG00000134853" 8
GO:0022037 "GO:0022037" "metencephalon development" "5/160" "117/20505" 0.0022561424780201 0.0215660678046039 0.0166319688008155 "ENSG00000273706/ENSG00000139874/ENSG00000165462/ENSG00000054598/ENSG00000198719" 5
GO:0060688 "GO:0060688" "regulation of morphogenesis of a branching structure" "4/160" "71/20505" 0.00231154775124386 0.0220237041445873 0.016984902557571 "ENSG00000273706/ENSG00000164690/ENSG00000019549/ENSG00000114251" 4
GO:0032814 "GO:0032814" "regulation of natural killer cell activation" "3/160" "34/20505" 0.00233622102189629 0.0220920975111718 0.0170376482110449 "ENSG00000110944/ENSG00000198846/ENSG00000160712" 3
GO:0045662 "GO:0045662" "negative regulation of myoblast differentiation" "3/160" "34/20505" 0.00233622102189629 0.0220920975111718 0.0170376482110449 "ENSG00000184344/ENSG00000198719/ENSG00000145824" 3
GO:0032526 "GO:0032526" "response to retinoic acid" "5/160" "118/20505" 0.00234138469349171 0.0220920975111718 0.0170376482110449 "ENSG00000121207/ENSG00000165731/ENSG00000128918/ENSG00000154342/ENSG00000114251" 5
GO:0072089 "GO:0072089" "stem cell proliferation" "5/160" "119/20505" 0.00242894703731581 0.0228445983413143 0.0176179844338053 "ENSG00000164736/ENSG00000164690/ENSG00000019549/ENSG00000154342/ENSG00000114251" 5
GO:0030856 "GO:0030856" "regulation of epithelial cell differentiation" "6/160" "174/20505" 0.00247487854403919 0.0232019863503674 0.0178936056675978 "ENSG00000273706/ENSG00000184344/ENSG00000156574/ENSG00000054598/ENSG00000198719/ENSG00000125931" 6
GO:0002315 "GO:0002315" "marginal zone B cell differentiation" "2/160" "10/20505" 0.00261320946858524 0.0235914743691723 0.0181939827523657 "ENSG00000100060/ENSG00000198719" 2
GO:0010533 "GO:0010533" "regulation of activation of Janus kinase activity" "2/160" "10/20505" 0.00261320946858524 0.0235914743691723 0.0181939827523657 "ENSG00000110944/ENSG00000160712" 2
GO:0014041 "GO:0014041" "regulation of neuron maturation" "2/160" "10/20505" 0.00261320946858524 0.0235914743691723 0.0181939827523657 "ENSG00000165731/ENSG00000149922" 2
GO:0014807 "GO:0014807" "regulation of somitogenesis" "2/160" "10/20505" 0.00261320946858524 0.0235914743691723 0.0181939827523657 "ENSG00000179111/ENSG00000198719" 2
GO:0016102 "GO:0016102" "diterpenoid biosynthetic process" "2/160" "10/20505" 0.00261320946858524 0.0235914743691723 0.0181939827523657 "ENSG00000184254/ENSG00000128918" 2
GO:0033327 "GO:0033327" "Leydig cell differentiation" "2/160" "10/20505" 0.00261320946858524 0.0235914743691723 0.0181939827523657 "ENSG00000169297/ENSG00000134853" 2
GO:0051133 "GO:0051133" "regulation of NK T cell activation" "2/160" "10/20505" 0.00261320946858524 0.0235914743691723 0.0181939827523657 "ENSG00000110944/ENSG00000160712" 2
GO:0051890 "GO:0051890" "regulation of cardioblast differentiation" "2/160" "10/20505" 0.00261320946858524 0.0235914743691723 0.0181939827523657 "ENSG00000141448/ENSG00000154342" 2
GO:0060513 "GO:0060513" "prostatic bud formation" "2/160" "10/20505" 0.00261320946858524 0.0235914743691723 0.0181939827523657 "ENSG00000164690/ENSG00000114251" 2
GO:0071104 "GO:0071104" "response to interleukin-9" "2/160" "10/20505" 0.00261320946858524 0.0235914743691723 0.0181939827523657 "ENSG00000126561/ENSG00000125931" 2
GO:1904338 "GO:1904338" "regulation of dopaminergic neuron differentiation" "2/160" "10/20505" 0.00261320946858524 0.0235914743691723 0.0181939827523657 "ENSG00000164690/ENSG00000154342" 2
GO:2001214 "GO:2001214" "positive regulation of vasculogenesis" "2/160" "10/20505" 0.00261320946858524 0.0235914743691723 0.0181939827523657 "ENSG00000128052/ENSG00000148926" 2
GO:0071300 "GO:0071300" "cellular response to retinoic acid" "4/160" "74/20505" 0.00268844985234246 0.0241396795686311 0.0186167641261633 "ENSG00000165731/ENSG00000128918/ENSG00000154342/ENSG00000114251" 4
GO:0070372 "GO:0070372" "regulation of ERK1 and ERK2 cascade" "9/160" "373/20505" 0.00269043950064059 0.0241396795686311 0.0186167641261633 "ENSG00000156574/ENSG00000128052/ENSG00000142405/ENSG00000146904/ENSG00000165731/ENSG00000107831/ENSG00000006606/ENSG00000162733/ENSG00000134853" 9
GO:0042303 "GO:0042303" "molting cycle" "5/160" "124/20505" 0.00290284290352957 0.0258866326000732 0.0199640319071369 "ENSG00000104371/ENSG00000125285/ENSG00000164690/ENSG00000135960/ENSG00000114251" 5
GO:0042633 "GO:0042633" "hair cycle" "5/160" "124/20505" 0.00290284290352957 0.0258866326000732 0.0199640319071369 "ENSG00000104371/ENSG00000125285/ENSG00000164690/ENSG00000135960/ENSG00000114251" 5
GO:0051897 "GO:0051897" "positive regulation of protein kinase B signaling" "6/160" "180/20505" 0.00292853212769866 0.0260363418647981 0.0200794892006342 "ENSG00000165731/ENSG00000186895/ENSG00000107831/ENSG00000158815/ENSG00000102678/ENSG00000134853" 6
GO:1905207 "GO:1905207" "regulation of cardiocyte differentiation" "4/160" "77/20505" 0.00310547220606135 0.0275257763719074 0.0212281561007639 "ENSG00000164736/ENSG00000141448/ENSG00000198719/ENSG00000154342" 4
GO:0010454 "GO:0010454" "negative regulation of cell fate commitment" "2/160" "11/20505" 0.00317759433374331 0.0277446669438782 0.0213969667155127 "ENSG00000164736/ENSG00000154342" 2
GO:0021936 "GO:0021936" "regulation of cerebellar granule cell precursor proliferation" "2/160" "11/20505" 0.00317759433374331 0.0277446669438782 0.0213969667155127 "ENSG00000273706/ENSG00000164690" 2
GO:0060068 "GO:0060068" "vagina development" "2/160" "11/20505" 0.00317759433374331 0.0277446669438782 0.0213969667155127 "ENSG00000273706/ENSG00000114251" 2
GO:1905902 "GO:1905902" "regulation of mesoderm formation" "2/160" "11/20505" 0.00317759433374331 0.0277446669438782 0.0213969667155127 "ENSG00000164736/ENSG00000154342" 2
GO:2001054 "GO:2001054" "negative regulation of mesenchymal cell apoptotic process" "2/160" "11/20505" 0.00317759433374331 0.0277446669438782 0.0213969667155127 "ENSG00000164690/ENSG00000196767" 2
GO:0031076 "GO:0031076" "embryonic camera-type eye development" "3/160" "38/20505" 0.00321935410892084 0.0280256272874805 0.0216136461635882 "ENSG00000184254/ENSG00000128918/ENSG00000114251" 3
GO:0048846 "GO:0048846" "axon extension involved in axon guidance" "3/160" "39/20505" 0.00346785238316091 0.0299217351644415 0.0230759436643808 "ENSG00000154342/ENSG00000187122/ENSG00000114251" 3
GO:0048854 "GO:0048854" "brain morphogenesis" "3/160" "39/20505" 0.00346785238316091 0.0299217351644415 0.0230759436643808 "ENSG00000187122/ENSG00000107831/ENSG00000114251" 3
GO:1902284 "GO:1902284" "neuron projection extension involved in neuron projection guidance" "3/160" "39/20505" 0.00346785238316091 0.0299217351644415 0.0230759436643808 "ENSG00000154342/ENSG00000187122/ENSG00000114251" 3
GO:0051961 "GO:0051961" "negative regulation of nervous system development" "8/160" "317/20505" 0.00350914430065943 0.0301889619983201 0.023282031691372 "ENSG00000164690/ENSG00000149922/ENSG00000198719/ENSG00000090932/ENSG00000197406/ENSG00000154342/ENSG00000187122/ENSG00000114251" 8
GO:0003206 "GO:0003206" "cardiac chamber morphogenesis" "5/160" "130/20505" 0.00355574665983138 0.0304868230770115 0.023511745156648 "ENSG00000141448/ENSG00000054598/ENSG00000103241/ENSG00000107831/ENSG00000114251" 5
GO:0001824 "GO:0001824" "blastocyst development" "4/160" "80/20505" 0.00356461315977366 0.0304868230770115 0.023511745156648 "ENSG00000164736/ENSG00000156574/ENSG00000163508/ENSG00000147596" 4
GO:0070371 "GO:0070371" "ERK1 and ERK2 cascade" "9/160" "390/20505" 0.00361000703845931 0.0307850454445874 0.0237417372515522 "ENSG00000156574/ENSG00000128052/ENSG00000142405/ENSG00000146904/ENSG00000165731/ENSG00000107831/ENSG00000006606/ENSG00000162733/ENSG00000134853" 9
GO:0014855 "GO:0014855" "striated muscle cell proliferation" "4/160" "81/20505" 0.00372735893995442 0.0316050375420295 0.024374123419728 "ENSG00000141448/ENSG00000164690/ENSG00000054598/ENSG00000102678" 4
GO:0003338 "GO:0003338" "metanephros morphogenesis" "3/160" "40/20505" 0.00372777365880348 0.0316050375420295 0.024374123419728 "ENSG00000273706/ENSG00000162849/ENSG00000125931" 3
GO:0010763 "GO:0010763" "positive regulation of fibroblast migration" "2/160" "12/20505" 0.00379363140213601 0.0316135950178001 0.0243807230312715 "ENSG00000183023/ENSG00000162733" 2
GO:0051132 "GO:0051132" "NK T cell activation" "2/160" "12/20505" 0.00379363140213601 0.0316135950178001 0.0243807230312715 "ENSG00000110944/ENSG00000160712" 2
GO:0060670 "GO:0060670" "branching involved in labyrinthine layer morphogenesis" "2/160" "12/20505" 0.00379363140213601 0.0316135950178001 0.0243807230312715 "ENSG00000148926/ENSG00000146374" 2
GO:0060900 "GO:0060900" "embryonic camera-type eye formation" "2/160" "12/20505" 0.00379363140213601 0.0316135950178001 0.0243807230312715 "ENSG00000184254/ENSG00000114251" 2
GO:0099624 "GO:0099624" "atrial cardiac muscle cell membrane repolarization" "2/160" "12/20505" 0.00379363140213601 0.0316135950178001 0.0243807230312715 "ENSG00000120457/ENSG00000162989" 2
GO:2000052 "GO:2000052" "positive regulation of non-canonical Wnt signaling pathway" "2/160" "12/20505" 0.00379363140213601 0.0316135950178001 0.0243807230312715 "ENSG00000146374/ENSG00000114251" 2
GO:0071560 "GO:0071560" "cellular response to transforming growth factor beta stimulus" "7/160" "254/20505" 0.00386482860898596 0.0321154081854657 0.0247677264026822 "ENSG00000243709/ENSG00000143768/ENSG00000156574/ENSG00000181195/ENSG00000125931/ENSG00000114251/ENSG00000168675" 7
GO:0042572 "GO:0042572" "retinol metabolic process" "3/160" "41/20505" 0.00399927603208516 0.0331384770363997 0.0255567274094484 "ENSG00000184254/ENSG00000121207/ENSG00000128918" 3
GO:0006874 "GO:0006874" "cellular calcium ion homeostasis" "10/160" "475/20505" 0.00420271503808016 0.0347258234078657 0.0267809049259761 "ENSG00000103888/ENSG00000139679/ENSG00000148926/ENSG00000121966/ENSG00000100678/ENSG00000134817/ENSG00000183023/ENSG00000183454/ENSG00000114251/ENSG00000134853" 10
GO:0098659 "GO:0098659" "inorganic cation import across plasma membrane" "4/160" "84/20505" 0.00424568950281619 0.0348838252689252 0.0269027575533267 "ENSG00000120457/ENSG00000100678/ENSG00000183023/ENSG00000162989" 4
GO:0099587 "GO:0099587" "inorganic ion import across plasma membrane" "4/160" "84/20505" 0.00424568950281619 0.0348838252689252 0.0269027575533267 "ENSG00000120457/ENSG00000100678/ENSG00000183023/ENSG00000162989" 4
GO:0009954 "GO:0009954" "proximal/distal pattern formation" "3/160" "42/20505" 0.00428251181633102 0.0350878068985104 0.0270600702414783 "ENSG00000156574/ENSG00000198719/ENSG00000128918" 3
GO:0002040 "GO:0002040" "sprouting angiogenesis" "6/160" "195/20505" 0.00433336373715035 0.0354052763440357 0.0273049058768398 "ENSG00000101445/ENSG00000128052/ENSG00000146374/ENSG00000176692/ENSG00000198719/ENSG00000134817" 6
GO:0030326 "GO:0030326" "embryonic limb morphogenesis" "5/160" "137/20505" 0.00444360606756157 0.0355064268955657 0.0273829142014205 "ENSG00000164690/ENSG00000128918/ENSG00000107831/ENSG00000114251/ENSG00000102678" 5
GO:0035113 "GO:0035113" "embryonic appendage morphogenesis" "5/160" "137/20505" 0.00444360606756157 0.0355064268955657 0.0273829142014205 "ENSG00000164690/ENSG00000128918/ENSG00000107831/ENSG00000114251/ENSG00000102678" 5
GO:0021903 "GO:0021903" "rostrocaudal neural tube patterning" "2/160" "13/20505" 0.00446049044238118 0.0355064268955657 0.0273829142014205 "ENSG00000164736/ENSG00000107831" 2
GO:0021978 "GO:0021978" "telencephalon regionalization" "2/160" "13/20505" 0.00446049044238118 0.0355064268955657 0.0273829142014205 "ENSG00000163508/ENSG00000164690" 2
GO:0042574 "GO:0042574" "retinal metabolic process" "2/160" "13/20505" 0.00446049044238118 0.0355064268955657 0.0273829142014205 "ENSG00000184254/ENSG00000128918" 2
GO:0060174 "GO:0060174" "limb bud formation" "2/160" "13/20505" 0.00446049044238118 0.0355064268955657 0.0273829142014205 "ENSG00000164690/ENSG00000076356" 2
GO:0060601 "GO:0060601" "lateral sprouting from an epithelium" "2/160" "13/20505" 0.00446049044238118 0.0355064268955657 0.0273829142014205 "ENSG00000164690/ENSG00000114251" 2
GO:0060712 "GO:0060712" "spongiotrophoblast layer development" "2/160" "13/20505" 0.00446049044238118 0.0355064268955657 0.0273829142014205 "ENSG00000148926/ENSG00000125931" 2
GO:2001053 "GO:2001053" "regulation of mesenchymal cell apoptotic process" "2/160" "13/20505" 0.00446049044238118 0.0355064268955657 0.0273829142014205 "ENSG00000164690/ENSG00000196767" 2
GO:0042692 "GO:0042692" "muscle cell differentiation" "9/160" "403/20505" 0.00446713336668998 0.0355064268955657 0.0273829142014205 "ENSG00000141448/ENSG00000164690/ENSG00000148926/ENSG00000198719/ENSG00000103241/ENSG00000154342/ENSG00000183023/ENSG00000102678/ENSG00000134853" 9
GO:0071559 "GO:0071559" "response to transforming growth factor beta" "7/160" "261/20505" 0.00447959394195251 0.0355089763691358 0.0273848803811275 "ENSG00000243709/ENSG00000143768/ENSG00000156574/ENSG00000181195/ENSG00000125931/ENSG00000114251/ENSG00000168675" 7
GO:0003416 "GO:0003416" "endochondral bone growth" "3/160" "43/20505" 0.0045776276413147 0.0358969459808191 0.027684086455023 "ENSG00000147869/ENSG00000165816/ENSG00000162733" 3
GO:0035886 "GO:0035886" "vascular smooth muscle cell differentiation" "3/160" "43/20505" 0.0045776276413147 0.0358969459808191 0.027684086455023 "ENSG00000141448/ENSG00000148926/ENSG00000102678" 3
GO:0055026 "GO:0055026" "negative regulation of cardiac muscle tissue development" "3/160" "43/20505" 0.0045776276413147 0.0358969459808191 0.027684086455023 "ENSG00000186895/ENSG00000198719/ENSG00000107831" 3
GO:0090184 "GO:0090184" "positive regulation of kidney development" "3/160" "43/20505" 0.0045776276413147 0.0358969459808191 0.027684086455023 "ENSG00000273706/ENSG00000164690/ENSG00000165731" 3
GO:0048639 "GO:0048639" "positive regulation of developmental growth" "6/160" "198/20505" 0.00466537984332369 0.0364872621436411 0.0281393442280964 "ENSG00000141448/ENSG00000198719/ENSG00000197406/ENSG00000154342/ENSG00000107831/ENSG00000102678" 6
GO:0045667 "GO:0045667" "regulation of osteoblast differentiation" "5/160" "139/20505" 0.00472387119272504 0.0368461953032553 0.0284161570975713 "ENSG00000177706/ENSG00000160712/ENSG00000019549/ENSG00000125931/ENSG00000162733" 5
GO:0043588 "GO:0043588" "skin development" "10/160" "484/20505" 0.00478726047533404 0.0372413215168938 0.028720882415008 "ENSG00000104371/ENSG00000125285/ENSG00000164690/ENSG00000054598/ENSG00000135960/ENSG00000179148/ENSG00000198719/ENSG00000114251/ENSG00000204262/ENSG00000170484" 10
GO:0072175 "GO:0072175" "epithelial tube formation" "5/160" "140/20505" 0.00486861656153774 0.0376738186309468 0.0290544285474112 "ENSG00000156574/ENSG00000148926/ENSG00000165731/ENSG00000107831/ENSG00000114251" 5
GO:0097553 "GO:0097553" "calcium ion transmembrane import into cytosol" "5/160" "140/20505" 0.00486861656153774 0.0376738186309468 0.0290544285474112 "ENSG00000103888/ENSG00000100678/ENSG00000134817/ENSG00000183023/ENSG00000183454" 5
GO:0003197 "GO:0003197" "endocardial cushion development" "3/160" "44/20505" 0.00488476455129255 0.0376990404024557 0.0290738798317454 "ENSG00000019549/ENSG00000103241/ENSG00000107831" 3
GO:0055074 "GO:0055074" "calcium ion homeostasis" "10/160" "488/20505" 0.00506678887951953 0.0389306136766015 0.0300236815506818 "ENSG00000103888/ENSG00000139679/ENSG00000148926/ENSG00000121966/ENSG00000100678/ENSG00000134817/ENSG00000183023/ENSG00000183454/ENSG00000114251/ENSG00000134853" 10
GO:0030238 "GO:0030238" "male sex determination" "2/160" "14/20505" 0.00517735089368124 0.0389306136766015 0.0300236815506818 "ENSG00000169297/ENSG00000102678" 2
GO:0042659 "GO:0042659" "regulation of cell fate specification" "2/160" "14/20505" 0.00517735089368124 0.0389306136766015 0.0300236815506818 "ENSG00000164736/ENSG00000154342" 2
GO:0045198 "GO:0045198" "establishment of epithelial cell apical/basal polarity" "2/160" "14/20505" 0.00517735089368124 0.0389306136766015 0.0300236815506818 "ENSG00000103241/ENSG00000114251" 2
GO:0060911 "GO:0060911" "cardiac cell fate commitment" "2/160" "14/20505" 0.00517735089368124 0.0389306136766015 0.0300236815506818 "ENSG00000164736/ENSG00000154342" 2
GO:0070669 "GO:0070669" "response to interleukin-2" "2/160" "14/20505" 0.00517735089368124 0.0389306136766015 0.0300236815506818 "ENSG00000126561/ENSG00000125931" 2
GO:0070986 "GO:0070986" "left/right axis specification" "2/160" "14/20505" 0.00517735089368124 0.0389306136766015 0.0300236815506818 "ENSG00000164093/ENSG00000198719" 2
GO:0097152 "GO:0097152" "mesenchymal cell apoptotic process" "2/160" "14/20505" 0.00517735089368124 0.0389306136766015 0.0300236815506818 "ENSG00000164690/ENSG00000196767" 2
GO:2001212 "GO:2001212" "regulation of vasculogenesis" "2/160" "14/20505" 0.00517735089368124 0.0389306136766015 0.0300236815506818 "ENSG00000128052/ENSG00000148926" 2
GO:0042551 "GO:0042551" "neuron maturation" "3/160" "45/20505" 0.0052040581017269 0.0389306136766015 0.0300236815506818 "ENSG00000165731/ENSG00000074660/ENSG00000149922" 3
GO:0098868 "GO:0098868" "bone growth" "3/160" "45/20505" 0.0052040581017269 0.0389306136766015 0.0300236815506818 "ENSG00000147869/ENSG00000165816/ENSG00000162733" 3
GO:0099054 "GO:0099054" "presynapse assembly" "3/160" "45/20505" 0.0052040581017269 0.0389306136766015 0.0300236815506818 "ENSG00000141668/ENSG00000154342/ENSG00000114251" 3
GO:0043491 "GO:0043491" "protein kinase B signaling" "7/160" "270/20505" 0.00537540662127249 0.0401098580796481 0.0309331267169359 "ENSG00000128052/ENSG00000165731/ENSG00000186895/ENSG00000107831/ENSG00000158815/ENSG00000102678/ENSG00000134853" 7
GO:0033273 "GO:0033273" "response to vitamin" "4/160" "90/20505" 0.00542399215396376 0.0403694072527837 0.0311332936545985 "ENSG00000121207/ENSG00000181195/ENSG00000019549/ENSG00000128918" 4
GO:0055007 "GO:0055007" "cardiac muscle cell differentiation" "5/160" "144/20505" 0.00547918719219273 0.0406767069471161 0.0313702862753647 "ENSG00000141448/ENSG00000198719/ENSG00000154342/ENSG00000183023/ENSG00000134853" 5
GO:0001974 "GO:0001974" "blood vessel remodeling" "3/160" "46/20505" 0.00553563845471411 0.0408882385859565 0.0315334216067314 "ENSG00000146374/ENSG00000054598/ENSG00000107831" 3
GO:0033628 "GO:0033628" "regulation of cell adhesion mediated by integrin" "3/160" "46/20505" 0.00553563845471411 0.0408882385859565 0.0315334216067314 "ENSG00000165731/ENSG00000176692/ENSG00000019549" 3
GO:0060326 "GO:0060326" "cell chemotaxis" "8/160" "343/20505" 0.00560739728416386 0.0413139472447841 0.0318617324140611 "ENSG00000110944/ENSG00000128052/ENSG00000160712/ENSG00000121966/ENSG00000145824/ENSG00000114251/ENSG00000006606/ENSG00000134853" 8
GO:0033135 "GO:0033135" "regulation of peptidyl-serine phosphorylation" "5/160" "145/20505" 0.00563990542975096 0.0414490537236722 0.0319659278919765 "ENSG00000213231/ENSG00000165731/ENSG00000009950/ENSG00000154342/ENSG00000114251" 5
GO:0061351 "GO:0061351" "neural precursor cell proliferation" "5/160" "146/20505" 0.00580392479693257 0.0424412000775694 0.0327310811574381 "ENSG00000164690/ENSG00000189431/ENSG00000154342/ENSG00000107831/ENSG00000114251" 5
GO:1903670 "GO:1903670" "regulation of sprouting angiogenesis" "5/160" "146/20505" 0.00580392479693257 0.0424412000775694 0.0327310811574381 "ENSG00000101445/ENSG00000128052/ENSG00000176692/ENSG00000198719/ENSG00000134817" 5
GO:0048701 "GO:0048701" "embryonic cranial skeleton morphogenesis" "3/160" "47/20505" 0.00587963047313225 0.0427136367775988 0.0329411870857019 "ENSG00000273706/ENSG00000156574/ENSG00000134853" 3
GO:0099172 "GO:0099172" "presynapse organization" "3/160" "47/20505" 0.00587963047313225 0.0427136367775988 0.0329411870857019 "ENSG00000141668/ENSG00000154342/ENSG00000114251" 3
GO:0061448 "GO:0061448" "connective tissue development" "7/160" "275/20505" 0.00592786340910194 0.0427136367775988 0.0329411870857019 "ENSG00000147869/ENSG00000128652/ENSG00000165816/ENSG00000019549/ENSG00000105855/ENSG00000114251/ENSG00000102678" 7
GO:0010455 "GO:0010455" "positive regulation of cell fate commitment" "2/160" "15/20505" 0.00594340176700264 0.0427136367775988 0.0329411870857019 "ENSG00000110944/ENSG00000154342" 2
GO:0016114 "GO:0016114" "terpenoid biosynthetic process" "2/160" "15/20505" 0.00594340176700264 0.0427136367775988 0.0329411870857019 "ENSG00000184254/ENSG00000128918" 2
GO:0021527 "GO:0021527" "spinal cord association neuron differentiation" "2/160" "15/20505" 0.00594340176700264 0.0427136367775988 0.0329411870857019 "ENSG00000273706/ENSG00000154342" 2
GO:0032927 "GO:0032927" "positive regulation of activin receptor signaling pathway" "2/160" "15/20505" 0.00594340176700264 0.0427136367775988 0.0329411870857019 "ENSG00000156574/ENSG00000102678" 2
GO:0021517 "GO:0021517" "ventral spinal cord development" "3/160" "48/20505" 0.00623615381352352 0.0447077203543046 0.0344790444333873 "ENSG00000273706/ENSG00000164690/ENSG00000165462" 3
GO:0048010 "GO:0048010" "vascular endothelial growth factor receptor signaling pathway" "4/160" "94/20505" 0.00632023070010394 0.0451996938821614 0.0348584593754285 "ENSG00000152804/ENSG00000128052/ENSG00000054598/ENSG00000102678" 4
GO:0060840 "GO:0060840" "artery development" "4/160" "95/20505" 0.00655871681489659 0.0467908455696891 0.0360855715900472 "ENSG00000164690/ENSG00000054598/ENSG00000103241/ENSG00000107831" 4
GO:0006775 "GO:0006775" "fat-soluble vitamin metabolic process" "3/160" "49/20505" 0.00660532301772624 0.046894586958372 0.0361655779943468 "ENSG00000121207/ENSG00000019549/ENSG00000128918" 3
GO:0060711 "GO:0060711" "labyrinthine layer development" "3/160" "49/20505" 0.00660532301772624 0.046894586958372 0.0361655779943468 "ENSG00000148926/ENSG00000146374/ENSG00000125931" 3
GO:0010721 "GO:0010721" "negative regulation of cell development" "8/160" "353/20505" 0.0066295826925333 0.0469517494668435 0.0362096622968765 "ENSG00000156574/ENSG00000164690/ENSG00000149922/ENSG00000198719/ENSG00000090932/ENSG00000197406/ENSG00000154342/ENSG00000114251" 8
GO:0001946 "GO:0001946" "lymphangiogenesis" "2/160" "16/20505" 0.00675784154719354 0.0469517494668435 0.0362096622968765 "ENSG00000176692/ENSG00000054598" 2
GO:0003198 "GO:0003198" "epithelial to mesenchymal transition involved in endocardial cushion formation" "2/160" "16/20505" 0.00675784154719354 0.0469517494668435 0.0362096622968765 "ENSG00000019549/ENSG00000107831" 2
GO:0021692 "GO:0021692" "cerebellar Purkinje cell layer morphogenesis" "2/160" "16/20505" 0.00675784154719354 0.0469517494668435 0.0362096622968765 "ENSG00000273706/ENSG00000198719" 2
GO:0021794 "GO:0021794" "thalamus development" "2/160" "16/20505" 0.00675784154719354 0.0469517494668435 0.0362096622968765 "ENSG00000164690/ENSG00000165186" 2
GO:0042976 "GO:0042976" "activation of Janus kinase activity" "2/160" "16/20505" 0.00675784154719354 0.0469517494668435 0.0362096622968765 "ENSG00000110944/ENSG00000160712" 2
GO:0060572 "GO:0060572" "morphogenesis of an epithelial bud" "2/160" "16/20505" 0.00675784154719354 0.0469517494668435 0.0362096622968765 "ENSG00000164690/ENSG00000114251" 2
GO:0070234 "GO:0070234" "positive regulation of T cell apoptotic process" "2/160" "16/20505" 0.00675784154719354 0.0469517494668435 0.0362096622968765 "ENSG00000131203/ENSG00000114251" 2
GO:1904953 "GO:1904953" "Wnt signaling pathway involved in midbrain dopaminergic neuron differentiation" "2/160" "16/20505" 0.00675784154719354 0.0469517494668435 0.0362096622968765 "ENSG00000154342/ENSG00000114251" 2
GO:0006661 "GO:0006661" "phosphatidylinositol biosynthetic process" "5/160" "153/20505" 0.00704743267950369 0.0487322472518873 0.0375828001298405 "ENSG00000281028/ENSG00000186895/ENSG00000107831/ENSG00000158815/ENSG00000102678" 5
GO:0060078 "GO:0060078" "regulation of postsynaptic membrane potential" "5/160" "153/20505" 0.00704743267950369 0.0487322472518873 0.0375828001298405 "ENSG00000157680/ENSG00000100678/ENSG00000183023/ENSG00000183454/ENSG00000188828" 5
GO:0045445 "GO:0045445" "myoblast differentiation" "4/160" "98/20505" 0.00730978335042093 0.0503085089411323 0.038798429027745 "ENSG00000184344/ENSG00000164690/ENSG00000198719/ENSG00000145824" 4
GO:0062014 "GO:0062014" "negative regulation of small molecule metabolic process" "4/160" "98/20505" 0.00730978335042093 0.0503085089411323 0.038798429027745 "ENSG00000158825/ENSG00000165140/ENSG00000009950/ENSG00000019549" 4
GO:0044331 "GO:0044331" "cell-cell adhesion mediated by cadherin" "3/160" "51/20505" 0.00738203215255533 0.0506864883714186 0.0390899305730815 "ENSG00000154342/ENSG00000114251/ENSG00000140937" 3
GO:1990823 "GO:1990823" "response to leukemia inhibitory factor" "4/160" "99/20505" 0.00757220745997194 0.0517493150009764 0.0399095931793405 "ENSG00000164736/ENSG00000139874/ENSG00000107742/ENSG00000121207" 4
GO:1990830 "GO:1990830" "cellular response to leukemia inhibitory factor" "4/160" "99/20505" 0.00757220745997194 0.0517493150009764 0.0399095931793405 "ENSG00000164736/ENSG00000139874/ENSG00000107742/ENSG00000121207" 4
GO:0021984 "GO:0021984" "adenohypophysis development" "2/160" "17/20505" 0.00761987809603106 0.0519537142911208 0.0400672279715239 "ENSG00000164093/ENSG00000107831" 2
GO:0061008 "GO:0061008" "hepaticobiliary system development" "5/160" "157/20505" 0.00783598059982323 0.0533028912894952 0.0411077268676161 "ENSG00000164736/ENSG00000156574/ENSG00000141448/ENSG00000128918/ENSG00000154342" 5
GO:0007596 "GO:0007596" "blood coagulation" "8/160" "364/20505" 0.00791098973243783 0.053688271386034 0.041404935881339 "ENSG00000204936/ENSG00000141448/ENSG00000124491/ENSG00000164690/ENSG00000157680/ENSG00000058866/ENSG00000154342/ENSG00000134853" 8
GO:0060041 "GO:0060041" "retina development in camera-type eye" "5/160" "158/20505" 0.0080423176084495 0.0543274341910272 0.0418978646770567 "ENSG00000273706/ENSG00000165731/ENSG00000198719/ENSG00000197406/ENSG00000134853" 5
GO:0060402 "GO:0060402" "calcium ion transport into cytosol" "5/160" "158/20505" 0.0080423176084495 0.0543274341910272 0.0418978646770567 "ENSG00000103888/ENSG00000100678/ENSG00000134817/ENSG00000183023/ENSG00000183454" 5
GO:0002690 "GO:0002690" "positive regulation of leukocyte chemotaxis" "4/160" "101/20505" 0.00811550862968262 0.0546955362714785 0.0421817487106715 "ENSG00000110944/ENSG00000160712/ENSG00000145824/ENSG00000114251" 4
GO:0002027 "GO:0002027" "regulation of heart rate" "4/160" "102/20505" 0.00839649949479911 0.0563297271153381 0.0434420531563363 "ENSG00000148926/ENSG00000120457/ENSG00000183023/ENSG00000162989" 4
GO:0051591 "GO:0051591" "response to cAMP" "4/160" "102/20505" 0.00839649949479911 0.0563297271153381 0.0434420531563363 "ENSG00000181195/ENSG00000100678/ENSG00000125931/ENSG00000183023" 4
GO:0048714 "GO:0048714" "positive regulation of oligodendrocyte differentiation" "2/160" "18/20505" 0.00852872855618985 0.056955550289624 0.0439246942944361 "ENSG00000164690/ENSG00000121966" 2
GO:2000049 "GO:2000049" "positive regulation of cell-cell adhesion mediated by cadherin" "2/160" "18/20505" 0.00852872855618985 0.056955550289624 0.0439246942944361 "ENSG00000154342/ENSG00000114251" 2
GO:0030514 "GO:0030514" "negative regulation of BMP signaling pathway" "3/160" "54/20505" 0.00864451921881684 0.0573360968594995 0.0442181756436914 "ENSG00000147869/ENSG00000184344/ENSG00000114251" 3
GO:0051150 "GO:0051150" "regulation of smooth muscle cell differentiation" "3/160" "54/20505" 0.00864451921881684 0.0573360968594995 0.0442181756436914 "ENSG00000164690/ENSG00000103241/ENSG00000102678" 3
GO:0071320 "GO:0071320" "cellular response to cAMP" "3/160" "54/20505" 0.00864451921881684 0.0573360968594995 0.0442181756436914 "ENSG00000181195/ENSG00000100678/ENSG00000183023" 3
GO:0007599 "GO:0007599" "hemostasis" "8/160" "370/20505" 0.00868415299334166 0.0573389334210482 0.0442203632285403 "ENSG00000204936/ENSG00000141448/ENSG00000124491/ENSG00000164690/ENSG00000157680/ENSG00000058866/ENSG00000154342/ENSG00000134853" 8
GO:0050817 "GO:0050817" "coagulation" "8/160" "370/20505" 0.00868415299334166 0.0573389334210482 0.0442203632285403 "ENSG00000204936/ENSG00000141448/ENSG00000124491/ENSG00000164690/ENSG00000157680/ENSG00000058866/ENSG00000154342/ENSG00000134853" 8
GO:0045665 "GO:0045665" "negative regulation of neuron differentiation" "6/160" "227/20505" 0.00890998567982231 0.058565636210068 0.0451664087802701 "ENSG00000164690/ENSG00000149922/ENSG00000198719/ENSG00000197406/ENSG00000154342/ENSG00000114251" 6
GO:0060348 "GO:0060348" "bone development" "6/160" "227/20505" 0.00890998567982231 0.058565636210068 0.0451664087802701 "ENSG00000164093/ENSG00000147869/ENSG00000177706/ENSG00000165816/ENSG00000054598/ENSG00000107831" 6
GO:0032092 "GO:0032092" "positive regulation of protein binding" "4/160" "104/20505" 0.00897744002984707 0.0588767087159253 0.0454063110313011 "ENSG00000100060/ENSG00000154342/ENSG00000114251/ENSG00000262655" 4
GO:0050768 "GO:0050768" "negative regulation of neurogenesis" "7/160" "298/20505" 0.00903128363861384 0.0590973258231442 0.0455764531674307 "ENSG00000164690/ENSG00000149922/ENSG00000198719/ENSG00000090932/ENSG00000197406/ENSG00000154342/ENSG00000114251" 7
GO:0001755 "GO:0001755" "neural crest cell migration" "3/160" "55/20505" 0.00909169379830012 0.0593598311607764 0.0457788999289407 "ENSG00000164093/ENSG00000164690/ENSG00000165731" 3
GO:0007379 "GO:0007379" "segment specification" "2/160" "19/20505" 0.00948361925612361 0.0607394071130743 0.046842842804613 "ENSG00000151379/ENSG00000198719" 2
GO:0030540 "GO:0030540" "female genitalia development" "2/160" "19/20505" 0.00948361925612361 0.0607394071130743 0.046842842804613 "ENSG00000273706/ENSG00000114251" 2
GO:0033189 "GO:0033189" "response to vitamin A" "2/160" "19/20505" 0.00948361925612361 0.0607394071130743 0.046842842804613 "ENSG00000121207/ENSG00000128918" 2
GO:0035089 "GO:0035089" "establishment of apical/basal cell polarity" "2/160" "19/20505" 0.00948361925612361 0.0607394071130743 0.046842842804613 "ENSG00000103241/ENSG00000114251" 2
GO:0036303 "GO:0036303" "lymph vessel morphogenesis" "2/160" "19/20505" 0.00948361925612361 0.0607394071130743 0.046842842804613 "ENSG00000176692/ENSG00000054598" 2
GO:0045605 "GO:0045605" "negative regulation of epidermal cell differentiation" "2/160" "19/20505" 0.00948361925612361 0.0607394071130743 0.046842842804613 "ENSG00000184344/ENSG00000198719" 2
GO:0060973 "GO:0060973" "cell migration involved in heart development" "2/160" "19/20505" 0.00948361925612361 0.0607394071130743 0.046842842804613 "ENSG00000164093/ENSG00000019549" 2
GO:0070262 "GO:0070262" "peptidyl-serine dephosphorylation" "2/160" "19/20505" 0.00948361925612361 0.0607394071130743 0.046842842804613 "ENSG00000101445/ENSG00000156475" 2
GO:0001709 "GO:0001709" "cell fate determination" "3/160" "56/20505" 0.00955218026393647 0.0607394071130743 0.046842842804613 "ENSG00000164736/ENSG00000141448/ENSG00000198719" 3
GO:0021879 "GO:0021879" "forebrain neuron differentiation" "3/160" "56/20505" 0.00955218026393647 0.0607394071130743 0.046842842804613 "ENSG00000196767/ENSG00000107831/ENSG00000114251" 3
GO:0032653 "GO:0032653" "regulation of interleukin-10 production" "3/160" "56/20505" 0.00955218026393647 0.0607394071130743 0.046842842804613 "ENSG00000131203/ENSG00000110944/ENSG00000198719" 3
GO:0048146 "GO:0048146" "positive regulation of fibroblast proliferation" "3/160" "56/20505" 0.00955218026393647 0.0607394071130743 0.046842842804613 "ENSG00000114251/ENSG00000162733/ENSG00000134853" 3
GO:0019233 "GO:0019233" "sensory perception of pain" "4/160" "106/20505" 0.00958402009181565 0.0608096719491557 0.0468970317542206 "ENSG00000128645/ENSG00000181195/ENSG00000179148/ENSG00000183454" 4
GO:0042391 "GO:0042391" "regulation of membrane potential" "9/160" "456/20505" 0.00970975854648719 0.0614741206676949 0.0474094613012578 "ENSG00000157680/ENSG00000128052/ENSG00000120457/ENSG00000100678/ENSG00000183023/ENSG00000183454/ENSG00000162989/ENSG00000188828/ENSG00000198216" 9
GO:0021549 "GO:0021549" "cerebellum development" "4/160" "107/20505" 0.00989705715670996 0.0625246051476817 0.0482196055174024 "ENSG00000273706/ENSG00000139874/ENSG00000054598/ENSG00000198719" 4
GO:0002313 "GO:0002313" "mature B cell differentiation involved in immune response" "2/160" "20/20505" 0.0104837856158512 0.0651518442578046 0.0502457587924338 "ENSG00000100060/ENSG00000198719" 2
GO:0030859 "GO:0030859" "polarized epithelial cell differentiation" "2/160" "20/20505" 0.0104837856158512 0.0651518442578046 0.0502457587924338 "ENSG00000103241/ENSG00000114251" 2
GO:0070230 "GO:0070230" "positive regulation of lymphocyte apoptotic process" "2/160" "20/20505" 0.0104837856158512 0.0651518442578046 0.0502457587924338 "ENSG00000131203/ENSG00000114251" 2
GO:0071305 "GO:0071305" "cellular response to vitamin D" "2/160" "20/20505" 0.0104837856158512 0.0651518442578046 0.0502457587924338 "ENSG00000181195/ENSG00000019549" 2
GO:0090185 "GO:0090185" "negative regulation of kidney development" "2/160" "20/20505" 0.0104837856158512 0.0651518442578046 0.0502457587924338 "ENSG00000164690/ENSG00000125931" 2
GO:0098915 "GO:0098915" "membrane repolarization during ventricular cardiac muscle cell action potential" "2/160" "20/20505" 0.0104837856158512 0.0651518442578046 0.0502457587924338 "ENSG00000120457/ENSG00000162989" 2
GO:2000696 "GO:2000696" "regulation of epithelial cell differentiation involved in kidney development" "2/160" "20/20505" 0.0104837856158512 0.0651518442578046 0.0502457587924338 "ENSG00000273706/ENSG00000125931" 2
GO:0032613 "GO:0032613" "interleukin-10 production" "3/160" "58/20505" 0.0105133916204047 0.0651518442578046 0.0502457587924338 "ENSG00000131203/ENSG00000110944/ENSG00000198719" 3
GO:0086065 "GO:0086065" "cell communication involved in cardiac conduction" "3/160" "58/20505" 0.0105133916204047 0.0651518442578046 0.0502457587924338 "ENSG00000120457/ENSG00000183023/ENSG00000162989" 3
GO:0003205 "GO:0003205" "cardiac chamber development" "5/160" "169/20505" 0.0105664682360964 0.0653423247158181 0.0503926592410249 "ENSG00000141448/ENSG00000054598/ENSG00000103241/ENSG00000107831/ENSG00000114251" 5
GO:0051963 "GO:0051963" "regulation of synapse assembly" "4/160" "110/20505" 0.010875770334997 0.0671131397254561 0.0517583296200279 "ENSG00000141668/ENSG00000154342/ENSG00000187122/ENSG00000114251" 4
GO:0061005 "GO:0061005" "cell differentiation involved in kidney development" "3/160" "59/20505" 0.0110142571147098 0.0678246359168973 0.0523070426522396 "ENSG00000273706/ENSG00000164690/ENSG00000125931" 3
GO:0007218 "GO:0007218" "neuropeptide signaling pathway" "4/160" "111/20505" 0.0112153741384024 0.0687735206600146 0.0530388321275434 "ENSG00000139874/ENSG00000181195/ENSG00000188828/ENSG00000101327" 4
GO:0033138 "GO:0033138" "positive regulation of peptidyl-serine phosphorylation" "4/160" "111/20505" 0.0112153741384024 0.0687735206600146 0.0530388321275434 "ENSG00000213231/ENSG00000165731/ENSG00000154342/ENSG00000114251" 4
GO:0007519 "GO:0007519" "skeletal muscle tissue development" "5/160" "172/20505" 0.0113391732094615 0.0688759548881314 0.0531178304364428 "ENSG00000164736/ENSG00000163508/ENSG00000164690/ENSG00000198719/ENSG00000154342" 5
GO:0002029 "GO:0002029" "desensitization of G protein-coupled receptor signaling pathway" "2/160" "21/20505" 0.0115284720536391 0.0688759548881314 0.0531178304364428 "ENSG00000148926/ENSG00000134817" 2
GO:0003323 "GO:0003323" "type B pancreatic cell development" "2/160" "21/20505" 0.0115284720536391 0.0688759548881314 0.0531178304364428 "ENSG00000198719/ENSG00000114251" 2
GO:0022401 "GO:0022401" "negative adaptation of signaling pathway" "2/160" "21/20505" 0.0115284720536391 0.0688759548881314 0.0531178304364428 "ENSG00000148926/ENSG00000134817" 2
GO:0043369 "GO:0043369" "CD4-positive or CD8-positive, alpha-beta T cell lineage commitment" "2/160" "21/20505" 0.0115284720536391 0.0688759548881314 0.0531178304364428 "ENSG00000164690/ENSG00000110944" 2
GO:0060438 "GO:0060438" "trachea development" "2/160" "21/20505" 0.0115284720536391 0.0688759548881314 0.0531178304364428 "ENSG00000164690/ENSG00000103241" 2
GO:0060602 "GO:0060602" "branch elongation of an epithelium" "2/160" "21/20505" 0.0115284720536391 0.0688759548881314 0.0531178304364428 "ENSG00000164690/ENSG00000114251" 2
GO:0060713 "GO:0060713" "labyrinthine layer morphogenesis" "2/160" "21/20505" 0.0115284720536391 0.0688759548881314 0.0531178304364428 "ENSG00000148926/ENSG00000146374" 2
GO:0061162 "GO:0061162" "establishment of monopolar cell polarity" "2/160" "21/20505" 0.0115284720536391 0.0688759548881314 0.0531178304364428 "ENSG00000103241/ENSG00000114251" 2
GO:1904948 "GO:1904948" "midbrain dopaminergic neuron differentiation" "2/160" "21/20505" 0.0115284720536391 0.0688759548881314 0.0531178304364428 "ENSG00000154342/ENSG00000114251" 2
GO:0045843 "GO:0045843" "negative regulation of striated muscle tissue development" "3/160" "60/20505" 0.0115287158608322 0.0688759548881314 0.0531178304364428 "ENSG00000186895/ENSG00000198719/ENSG00000107831" 3
GO:0060042 "GO:0060042" "retina morphogenesis in camera-type eye" "3/160" "60/20505" 0.0115287158608322 0.0688759548881314 0.0531178304364428 "ENSG00000273706/ENSG00000198719/ENSG00000197406" 3
GO:0030282 "GO:0030282" "bone mineralization" "4/160" "112/20505" 0.0115617414872043 0.0688759548881314 0.0531178304364428 "ENSG00000147869/ENSG00000177706/ENSG00000183023/ENSG00000162733" 4
GO:0098739 "GO:0098739" "import across plasma membrane" "4/160" "112/20505" 0.0115617414872043 0.0688759548881314 0.0531178304364428 "ENSG00000120457/ENSG00000100678/ENSG00000183023/ENSG00000162989" 4
GO:0060401 "GO:0060401" "cytosolic calcium ion transport" "5/160" "173/20505" 0.011605078953342 0.0688979863124063 0.0531348212928427 "ENSG00000103888/ENSG00000100678/ENSG00000134817/ENSG00000183023/ENSG00000183454" 5
GO:0018209 "GO:0018209" "peptidyl-serine modification" "7/160" "313/20505" 0.0116125494878688 0.0688979863124063 0.0531348212928427 "ENSG00000107742/ENSG00000213231/ENSG00000105146/ENSG00000165731/ENSG00000009950/ENSG00000154342/ENSG00000114251" 7
GO:0051896 "GO:0051896" "regulation of protein kinase B signaling" "6/160" "241/20505" 0.0117295101387761 0.0694510468743324 0.0535613471711001 "ENSG00000165731/ENSG00000186895/ENSG00000107831/ENSG00000158815/ENSG00000102678/ENSG00000134853" 6
GO:0007416 "GO:0007416" "synapse assembly" "5/160" "174/20505" 0.0118752032258066 0.0701716554252206 0.0541170877467379 "ENSG00000141668/ENSG00000107742/ENSG00000154342/ENSG00000187122/ENSG00000114251" 5
GO:0048635 "GO:0048635" "negative regulation of muscle organ development" "3/160" "61/20505" 0.0120568277358204 0.0711012522727314 0.0548340022025959 "ENSG00000186895/ENSG00000198719/ENSG00000107831" 3
GO:0000187 "GO:0000187" "activation of MAPK activity" "5/160" "175/20505" 0.0121495755271304 0.0715040410801942 0.0551446369896018 "ENSG00000165731/ENSG00000124493/ENSG00000121966/ENSG00000163235/ENSG00000114251" 5
GO:0061337 "GO:0061337" "cardiac conduction" "4/160" "114/20505" 0.0122749538324078 0.0716453091972085 0.0552535843849277 "ENSG00000120457/ENSG00000100678/ENSG00000183023/ENSG00000162989" 4
GO:0045661 "GO:0045661" "regulation of myoblast differentiation" "3/160" "62/20505" 0.0125986485858988 0.0716453091972085 0.0552535843849277 "ENSG00000184344/ENSG00000198719/ENSG00000145824" 3
GO:0001759 "GO:0001759" "organ induction" "2/160" "22/20505" 0.0126169318935728 0.0716453091972085 0.0552535843849277 "ENSG00000154342/ENSG00000107831" 2
GO:0002827 "GO:0002827" "positive regulation of T-helper 1 type immune response" "2/160" "22/20505" 0.0126169318935728 0.0716453091972085 0.0552535843849277 "ENSG00000110944/ENSG00000160712" 2
GO:0007530 "GO:0007530" "sex determination" "2/160" "22/20505" 0.0126169318935728 0.0716453091972085 0.0552535843849277 "ENSG00000169297/ENSG00000102678" 2
GO:0033630 "GO:0033630" "positive regulation of cell adhesion mediated by integrin" "2/160" "22/20505" 0.0126169318935728 0.0716453091972085 0.0552535843849277 "ENSG00000165731/ENSG00000176692" 2
GO:0040037 "GO:0040037" "negative regulation of fibroblast growth factor receptor signaling pathway" "2/160" "22/20505" 0.0126169318935728 0.0716453091972085 0.0552535843849277 "ENSG00000147596/ENSG00000114251" 2
GO:0042403 "GO:0042403" "thyroid hormone metabolic process" "2/160" "22/20505" 0.0126169318935728 0.0716453091972085 0.0552535843849277 "ENSG00000197406/ENSG00000176928" 2
GO:0042438 "GO:0042438" "melanin biosynthetic process" "2/160" "22/20505" 0.0126169318935728 0.0716453091972085 0.0552535843849277 "ENSG00000125931/ENSG00000114251" 2
GO:0042573 "GO:0042573" "retinoic acid metabolic process" "2/160" "22/20505" 0.0126169318935728 0.0716453091972085 0.0552535843849277 "ENSG00000184254/ENSG00000128918" 2
GO:0060972 "GO:0060972" "left/right pattern formation" "2/160" "22/20505" 0.0126169318935728 0.0716453091972085 0.0552535843849277 "ENSG00000164093/ENSG00000198719" 2
GO:0061339 "GO:0061339" "establishment or maintenance of monopolar cell polarity" "2/160" "22/20505" 0.0126169318935728 0.0716453091972085 0.0552535843849277 "ENSG00000103241/ENSG00000114251" 2
GO:0086014 "GO:0086014" "atrial cardiac muscle cell action potential" "2/160" "22/20505" 0.0126169318935728 0.0716453091972085 0.0552535843849277 "ENSG00000120457/ENSG00000162989" 2
GO:0086026 "GO:0086026" "atrial cardiac muscle cell to AV node cell signaling" "2/160" "22/20505" 0.0126169318935728 0.0716453091972085 0.0552535843849277 "ENSG00000120457/ENSG00000162989" 2
GO:0086066 "GO:0086066" "atrial cardiac muscle cell to AV node cell communication" "2/160" "22/20505" 0.0126169318935728 0.0716453091972085 0.0552535843849277 "ENSG00000120457/ENSG00000162989" 2
GO:2000050 "GO:2000050" "regulation of non-canonical Wnt signaling pathway" "2/160" "22/20505" 0.0126169318935728 0.0716453091972085 0.0552535843849277 "ENSG00000146374/ENSG00000114251" 2
GO:2000738 "GO:2000738" "positive regulation of stem cell differentiation" "2/160" "22/20505" 0.0126169318935728 0.0716453091972085 0.0552535843849277 "ENSG00000141448/ENSG00000054598" 2
GO:0046777 "GO:0046777" "protein autophosphorylation" "6/160" "245/20505" 0.0126389673660717 0.0716453091972085 0.0552535843849277 "ENSG00000128052/ENSG00000142405/ENSG00000146904/ENSG00000102096/ENSG00000162733/ENSG00000134853" 6
GO:0060560 "GO:0060560" "developmental growth involved in morphogenesis" "6/160" "245/20505" 0.0126389673660717 0.0716453091972085 0.0552535843849277 "ENSG00000273706/ENSG00000164690/ENSG00000162849/ENSG00000154342/ENSG00000187122/ENSG00000114251" 6
GO:0046620 "GO:0046620" "regulation of organ growth" "4/160" "117/20505" 0.0133966443308104 0.0757933939412388 0.0584526291375888 "ENSG00000141448/ENSG00000054598/ENSG00000107831/ENSG00000102678" 4
GO:0033344 "GO:0033344" "cholesterol efflux" "3/160" "64/20505" 0.0137236208946204 0.0761631624554396 0.0587377983417029 "ENSG00000164690/ENSG00000160179/ENSG00000118777" 3
GO:0051148 "GO:0051148" "negative regulation of muscle cell differentiation" "3/160" "64/20505" 0.0137236208946204 0.0761631624554396 0.0587377983417029 "ENSG00000164690/ENSG00000198719/ENSG00000102678" 3
GO:0050900 "GO:0050900" "leukocyte migration" "9/160" "483/20505" 0.013728615107642 0.0761631624554396 0.0587377983417029 "ENSG00000204936/ENSG00000110944/ENSG00000142405/ENSG00000160712/ENSG00000165731/ENSG00000121966/ENSG00000145824/ENSG00000114251/ENSG00000006606" 9
GO:0003272 "GO:0003272" "endocardial cushion formation" "2/160" "23/20505" 0.0137484272740076 0.0761631624554396 0.0587377983417029 "ENSG00000019549/ENSG00000107831" 2
GO:0006582 "GO:0006582" "melanin metabolic process" "2/160" "23/20505" 0.0137484272740076 0.0761631624554396 0.0587377983417029 "ENSG00000125931/ENSG00000114251" 2
GO:0021516 "GO:0021516" "dorsal spinal cord development" "2/160" "23/20505" 0.0137484272740076 0.0761631624554396 0.0587377983417029 "ENSG00000273706/ENSG00000154342" 2
GO:0021697 "GO:0021697" "cerebellar cortex formation" "2/160" "23/20505" 0.0137484272740076 0.0761631624554396 0.0587377983417029 "ENSG00000273706/ENSG00000198719" 2
GO:0023058 "GO:0023058" "adaptation of signaling pathway" "2/160" "23/20505" 0.0137484272740076 0.0761631624554396 0.0587377983417029 "ENSG00000148926/ENSG00000134817" 2
GO:0051151 "GO:0051151" "negative regulation of smooth muscle cell differentiation" "2/160" "23/20505" 0.0137484272740076 0.0761631624554396 0.0587377983417029 "ENSG00000164690/ENSG00000102678" 2
GO:1903579 "GO:1903579" "negative regulation of ATP metabolic process" "2/160" "23/20505" 0.0137484272740076 0.0761631624554396 0.0587377983417029 "ENSG00000165140/ENSG00000009950" 2
GO:1903589 "GO:1903589" "positive regulation of blood vessel endothelial cell proliferation involved in sprouting angiogenesis" "2/160" "23/20505" 0.0137484272740076 0.0761631624554396 0.0587377983417029 "ENSG00000101445/ENSG00000134817" 2
GO:0070588 "GO:0070588" "calcium ion transmembrane transport" "7/160" "325/20505" 0.0140332621378893 0.0775941242974032 0.059841370533274 "ENSG00000103888/ENSG00000100678/ENSG00000154342/ENSG00000134817/ENSG00000183023/ENSG00000183454/ENSG00000198216" 7
GO:0060538 "GO:0060538" "skeletal muscle organ development" "5/160" "182/20505" 0.0141915478048147 0.078321277979402 0.060402158779976 "ENSG00000164736/ENSG00000163508/ENSG00000164690/ENSG00000198719/ENSG00000154342" 5
GO:0045604 "GO:0045604" "regulation of epidermal cell differentiation" "3/160" "65/20505" 0.0143068645667199 0.0785132811588287 0.0605502335666648 "ENSG00000184344/ENSG00000054598/ENSG00000198719" 3
GO:0060038 "GO:0060038" "cardiac muscle cell proliferation" "3/160" "65/20505" 0.0143068645667199 0.0785132811588287 0.0605502335666648 "ENSG00000141448/ENSG00000054598/ENSG00000102678" 3
GO:0072091 "GO:0072091" "regulation of stem cell proliferation" "3/160" "65/20505" 0.0143068645667199 0.0785132811588287 0.0605502335666648 "ENSG00000164736/ENSG00000164690/ENSG00000019549" 3
GO:0046488 "GO:0046488" "phosphatidylinositol metabolic process" "6/160" "252/20505" 0.0143479598734504 0.0785913532394052 0.0606104435418967 "ENSG00000281028/ENSG00000186895/ENSG00000107831/ENSG00000158815/ENSG00000102678/ENSG00000134853" 6
GO:0010811 "GO:0010811" "positive regulation of cell-substrate adhesion" "4/160" "120/20505" 0.0145816173154868 0.0795731915070875 0.0613676471074003 "ENSG00000128052/ENSG00000146904/ENSG00000107742/ENSG00000103241" 4
GO:0046660 "GO:0046660" "female sex differentiation" "4/160" "120/20505" 0.0145816173154868 0.0795731915070875 0.0613676471074003 "ENSG00000273706/ENSG00000054598/ENSG00000114251/ENSG00000134853" 4
GO:0022407 "GO:0022407" "regulation of cell-cell adhesion" "9/160" "489/20505" 0.0147684892755042 0.0803692910849719 0.0619816071237408 "ENSG00000156574/ENSG00000164690/ENSG00000131203/ENSG00000110944/ENSG00000160712/ENSG00000019549/ENSG00000162849/ENSG00000154342/ENSG00000114251" 9
GO:0001829 "GO:0001829" "trophectodermal cell differentiation" "2/160" "24/20505" 0.0149222290568923 0.0803692910849719 0.0619816071237408 "ENSG00000156574/ENSG00000163508" 2
GO:0046339 "GO:0046339" "diacylglycerol metabolic process" "2/160" "24/20505" 0.0149222290568923 0.0803692910849719 0.0619816071237408 "ENSG00000157680/ENSG00000058866" 2
GO:0090103 "GO:0090103" "cochlea morphogenesis" "2/160" "24/20505" 0.0149222290568923 0.0803692910849719 0.0619816071237408 "ENSG00000196767/ENSG00000114251" 2
GO:1903429 "GO:1903429" "regulation of cell maturation" "2/160" "24/20505" 0.0149222290568923 0.0803692910849719 0.0619816071237408 "ENSG00000165731/ENSG00000149922" 2
GO:2000047 "GO:2000047" "regulation of cell-cell adhesion mediated by cadherin" "2/160" "24/20505" 0.0149222290568923 0.0803692910849719 0.0619816071237408 "ENSG00000154342/ENSG00000114251" 2
GO:2000679 "GO:2000679" "positive regulation of transcription regulatory region DNA binding" "2/160" "24/20505" 0.0149222290568923 0.0803692910849719 0.0619816071237408 "ENSG00000054598/ENSG00000154342" 2
GO:0050769 "GO:0050769" "positive regulation of neurogenesis" "9/160" "490/20505" 0.0149473143077691 0.0803692910849719 0.0619816071237408 "ENSG00000164690/ENSG00000189431/ENSG00000165731/ENSG00000074660/ENSG00000128652/ENSG00000121966/ENSG00000154342/ENSG00000076356/ENSG00000114251" 9
GO:0030595 "GO:0030595" "leukocyte chemotaxis" "6/160" "255/20505" 0.0151274786339991 0.0811887614760504 0.062613590946712 "ENSG00000110944/ENSG00000160712/ENSG00000121966/ENSG00000145824/ENSG00000114251/ENSG00000006606" 6
GO:0022409 "GO:0022409" "positive regulation of cell-cell adhesion" "7/160" "331/20505" 0.0153704968068356 0.0823419471794766 0.0635029393812392 "ENSG00000156574/ENSG00000164690/ENSG00000110944/ENSG00000160712/ENSG00000162849/ENSG00000154342/ENSG00000114251" 7
GO:0051785 "GO:0051785" "positive regulation of nuclear division" "3/160" "67/20505" 0.0155150693602197 0.0828130983186909 0.0638662958873431 "ENSG00000163235/ENSG00000107831/ENSG00000114251" 3
GO:1904888 "GO:1904888" "cranial skeletal system development" "3/160" "67/20505" 0.0155150693602197 0.0828130983186909 0.0638662958873431 "ENSG00000273706/ENSG00000156574/ENSG00000134853" 3
GO:0051090 "GO:0051090" "regulation of DNA-binding transcription factor activity" "9/160" "496/20505" 0.0160540724966074 0.0843032035016537 0.065015480019449 "ENSG00000156574/ENSG00000163508/ENSG00000164690/ENSG00000142405/ENSG00000149922/ENSG00000169297/ENSG00000154342/ENSG00000114251/ENSG00000162733" 9
GO:0001945 "GO:0001945" "lymph vessel development" "2/160" "25/20505" 0.0161376167379574 0.0843032035016537 0.065015480019449 "ENSG00000176692/ENSG00000054598" 2
GO:0002335 "GO:0002335" "mature B cell differentiation" "2/160" "25/20505" 0.0161376167379574 0.0843032035016537 0.065015480019449 "ENSG00000100060/ENSG00000198719" 2
GO:0030325 "GO:0030325" "adrenal gland development" "2/160" "25/20505" 0.0161376167379574 0.0843032035016537 0.065015480019449 "ENSG00000169297/ENSG00000134853" 2
GO:0042430 "GO:0042430" "indole-containing compound metabolic process" "2/160" "25/20505" 0.0161376167379574 0.0843032035016537 0.065015480019449 "ENSG00000131203/ENSG00000183454" 2
GO:0042789 "GO:0042789" "mRNA transcription by RNA polymerase II" "2/160" "25/20505" 0.0161376167379574 0.0843032035016537 0.065015480019449 "ENSG00000164736/ENSG00000135363" 2
GO:0060065 "GO:0060065" "uterus development" "2/160" "25/20505" 0.0161376167379574 0.0843032035016537 0.065015480019449 "ENSG00000273706/ENSG00000114251" 2
GO:0072215 "GO:0072215" "regulation of metanephros development" "2/160" "25/20505" 0.0161376167379574 0.0843032035016537 0.065015480019449 "ENSG00000165731/ENSG00000125931" 2
GO:1900543 "GO:1900543" "negative regulation of purine nucleotide metabolic process" "2/160" "25/20505" 0.0161376167379574 0.0843032035016537 0.065015480019449 "ENSG00000165140/ENSG00000009950" 2
GO:1902036 "GO:1902036" "regulation of hematopoietic stem cell differentiation" "2/160" "25/20505" 0.0161376167379574 0.0843032035016537 0.065015480019449 "ENSG00000054598/ENSG00000135363" 2
GO:0046635 "GO:0046635" "positive regulation of alpha-beta T cell activation" "3/160" "68/20505" 0.0161401004994619 0.0843032035016537 0.065015480019449 "ENSG00000164690/ENSG00000110944/ENSG00000160712" 3
GO:0048857 "GO:0048857" "neural nucleus development" "3/160" "68/20505" 0.0161401004994619 0.0843032035016537 0.065015480019449 "ENSG00000184254/ENSG00000165462/ENSG00000102678" 3
GO:0045669 "GO:0045669" "positive regulation of osteoblast differentiation" "3/160" "69/20505" 0.0167791248939132 0.0873290752930538 0.0673490628350929 "ENSG00000177706/ENSG00000160712/ENSG00000162733" 3
GO:0046622 "GO:0046622" "positive regulation of organ growth" "3/160" "69/20505" 0.0167791248939132 0.0873290752930538 0.0673490628350929 "ENSG00000141448/ENSG00000107831/ENSG00000102678" 3
GO:0001666 "GO:0001666" "response to hypoxia" "7/160" "338/20505" 0.0170426472483181 0.0885430607483669 0.0682853006509223 "ENSG00000141448/ENSG00000165215/ENSG00000148926/ENSG00000121966/ENSG00000181195/ENSG00000100678/ENSG00000183023" 7
GO:0002068 "GO:0002068" "glandular epithelial cell development" "2/160" "26/20505" 0.0173938783577596 0.0892580599937663 0.0688367152736451 "ENSG00000198719/ENSG00000114251" 2
GO:0002360 "GO:0002360" "T cell lineage commitment" "2/160" "26/20505" 0.0173938783577596 0.0892580599937663 0.0688367152736451 "ENSG00000164690/ENSG00000110944" 2
GO:0021846 "GO:0021846" "cell proliferation in forebrain" "2/160" "26/20505" 0.0173938783577596 0.0892580599937663 0.0688367152736451 "ENSG00000154342/ENSG00000107831" 2
GO:0051797 "GO:0051797" "regulation of hair follicle development" "2/160" "26/20505" 0.0173938783577596 0.0892580599937663 0.0688367152736451 "ENSG00000104371/ENSG00000114251" 2
GO:0060037 "GO:0060037" "pharyngeal system development" "2/160" "26/20505" 0.0173938783577596 0.0892580599937663 0.0688367152736451 "ENSG00000076356/ENSG00000107831" 2
GO:0060740 "GO:0060740" "prostate gland epithelium morphogenesis" "2/160" "26/20505" 0.0173938783577596 0.0892580599937663 0.0688367152736451 "ENSG00000164690/ENSG00000114251" 2
GO:0140131 "GO:0140131" "positive regulation of lymphocyte chemotaxis" "2/160" "26/20505" 0.0173938783577596 0.0892580599937663 0.0688367152736451 "ENSG00000145824/ENSG00000114251" 2
GO:0055025 "GO:0055025" "positive regulation of cardiac muscle tissue development" "3/160" "70/20505" 0.01743216877825 0.0892978873491789 0.0688674305314586 "ENSG00000141448/ENSG00000154342/ENSG00000102678" 3
GO:0010595 "GO:0010595" "positive regulation of endothelial cell migration" "4/160" "127/20505" 0.0175986868791941 0.0899932851776973 0.0694037283439695 "ENSG00000128052/ENSG00000126561/ENSG00000176692/ENSG00000114251" 4
GO:0006493 "GO:0006493" "protein O-linked glycosylation" "4/160" "128/20505" 0.0180590489679774 0.0921862447318218 0.0710949608494086 "ENSG00000156966/ENSG00000100060/ENSG00000176928/ENSG00000148488" 4
GO:0060350 "GO:0060350" "endochondral bone morphogenesis" "3/160" "71/20505" 0.0180992550000297 0.092230524172625 0.0711291096003366 "ENSG00000147869/ENSG00000165816/ENSG00000054598" 3
GO:0072676 "GO:0072676" "lymphocyte migration" "4/160" "129/20505" 0.0185268507719928 0.0937721405826865 0.0723180197098326 "ENSG00000165731/ENSG00000145824/ENSG00000114251/ENSG00000006606" 4
GO:0003148 "GO:0003148" "outflow tract septum morphogenesis" "2/160" "27/20505" 0.0186903104135748 0.0937721405826865 0.0723180197098326 "ENSG00000141448/ENSG00000107831" 2
GO:0021544 "GO:0021544" "subpallium development" "2/160" "27/20505" 0.0186903104135748 0.0937721405826865 0.0723180197098326 "ENSG00000184254/ENSG00000107831" 2
GO:0021680 "GO:0021680" "cerebellar Purkinje cell layer development" "2/160" "27/20505" 0.0186903104135748 0.0937721405826865 0.0723180197098326 "ENSG00000273706/ENSG00000198719" 2
GO:0042481 "GO:0042481" "regulation of odontogenesis" "2/160" "27/20505" 0.0186903104135748 0.0937721405826865 0.0723180197098326 "ENSG00000164690/ENSG00000107831" 2
GO:0048596 "GO:0048596" "embryonic camera-type eye morphogenesis" "2/160" "27/20505" 0.0186903104135748 0.0937721405826865 0.0723180197098326 "ENSG00000184254/ENSG00000114251" 2
GO:0048799 "GO:0048799" "animal organ maturation" "2/160" "27/20505" 0.0186903104135748 0.0937721405826865 0.0723180197098326 "ENSG00000165731/ENSG00000128918" 2
GO:0060914 "GO:0060914" "heart formation" "2/160" "27/20505" 0.0186903104135748 0.0937721405826865 0.0723180197098326 "ENSG00000164736/ENSG00000154342" 2
GO:1905208 "GO:1905208" "negative regulation of cardiocyte differentiation" "2/160" "27/20505" 0.0186903104135748 0.0937721405826865 0.0723180197098326 "ENSG00000198719/ENSG00000154342" 2
GO:0051099 "GO:0051099" "positive regulation of binding" "5/160" "196/20505" 0.0189419717450852 0.0948720331410517 0.0731662679338817 "ENSG00000100060/ENSG00000054598/ENSG00000154342/ENSG00000114251/ENSG00000262655" 5
GO:0002688 "GO:0002688" "regulation of leukocyte chemotaxis" "4/160" "130/20505" 0.0190021239184106 0.0950106195920528 0.0732731472013564 "ENSG00000110944/ENSG00000160712/ENSG00000145824/ENSG00000114251" 4
GO:0030199 "GO:0030199" "collagen fibril organization" "3/160" "73/20505" 0.0194756293092955 0.0969274318972138 0.0747514121658045 "ENSG00000054598/ENSG00000204262/ENSG00000162733" 3
GO:0048844 "GO:0048844" "artery morphogenesis" "3/160" "73/20505" 0.0194756293092955 0.0969274318972138 0.0747514121658045 "ENSG00000054598/ENSG00000103241/ENSG00000107831" 3
GO:0090101 "GO:0090101" "negative regulation of transmembrane receptor protein serine/threonine kinase signaling pathway" "4/160" "131/20505" 0.0194848991301066 0.0969274318972138 0.0747514121658045 "ENSG00000147869/ENSG00000184344/ENSG00000114251/ENSG00000168675" 4
GO:0021602 "GO:0021602" "cranial nerve morphogenesis" "2/160" "28/20505" 0.020026217772133 0.0984482134176288 0.0759242541984628 "ENSG00000165462/ENSG00000128652" 2
GO:0035902 "GO:0035902" "response to immobilization stress" "2/160" "28/20505" 0.020026217772133 0.0984482134176288 0.0759242541984628 "ENSG00000169297/ENSG00000183023" 2
GO:0036336 "GO:0036336" "dendritic cell migration" "2/160" "28/20505" 0.020026217772133 0.0984482134176288 0.0759242541984628 "ENSG00000142405/ENSG00000121966" 2
GO:0048843 "GO:0048843" "negative regulation of axon extension involved in axon guidance" "2/160" "28/20505" 0.020026217772133 0.0984482134176288 0.0759242541984628 "ENSG00000154342/ENSG00000114251" 2
GO:0060512 "GO:0060512" "prostate gland morphogenesis" "2/160" "28/20505" 0.020026217772133 0.0984482134176288 0.0759242541984628 "ENSG00000164690/ENSG00000114251" 2
GO:0060669 "GO:0060669" "embryonic placenta morphogenesis" "2/160" "28/20505" 0.020026217772133 0.0984482134176288 0.0759242541984628 "ENSG00000148926/ENSG00000146374" 2
GO:1905809 "GO:1905809" "negative regulation of synapse organization" "2/160" "28/20505" 0.020026217772133 0.0984482134176288 0.0759242541984628 "ENSG00000187122/ENSG00000114251" 2
GO:0051705 "GO:0051705" "multi-organism behavior" "3/160" "74/20505" 0.0201849467511386 0.0989810906133877 0.0763352144613549 "ENSG00000165186/ENSG00000181195/ENSG00000176928" 3
GO:0036293 "GO:0036293" "response to decreased oxygen levels" "7/160" "350/20505" 0.0202022943918607 0.0989810906133877 0.0763352144613549 "ENSG00000141448/ENSG00000165215/ENSG00000148926/ENSG00000121966/ENSG00000181195/ENSG00000100678/ENSG00000183023" 7
GO:0001838 "GO:0001838" "embryonic epithelial tube formation" "4/160" "133/20505" 0.020473074127011 0.100140036490815 0.0772290052001136 "ENSG00000156574/ENSG00000148926/ENSG00000165731/ENSG00000114251" 4
GO:0033555 "GO:0033555" "multicellular organismal response to stress" "3/160" "75/20505" 0.0209083653677143 0.102098445243012 0.0787393497636618 "ENSG00000131203/ENSG00000165731/ENSG00000181195" 3
GO:0008202 "GO:0008202" "steroid metabolic process" "7/160" "354/20505" 0.0213408677407932 0.103638530183476 0.0799270787883722 "ENSG00000164690/ENSG00000148926/ENSG00000074660/ENSG00000160179/ENSG00000169297/ENSG00000019549/ENSG00000134853" 7
GO:0002026 "GO:0002026" "regulation of the force of heart contraction" "2/160" "29/20505" 0.0214009135831862 0.103638530183476 0.0799270787883722 "ENSG00000148926/ENSG00000183023" 2
GO:0002825 "GO:0002825" "regulation of T-helper 1 type immune response" "2/160" "29/20505" 0.0214009135831862 0.103638530183476 0.0799270787883722 "ENSG00000110944/ENSG00000160712" 2
GO:0071295 "GO:0071295" "cellular response to vitamin" "2/160" "29/20505" 0.0214009135831862 0.103638530183476 0.0799270787883722 "ENSG00000181195/ENSG00000019549" 2
GO:1905331 "GO:1905331" "negative regulation of morphogenesis of an epithelium" "2/160" "29/20505" 0.0214009135831862 0.103638530183476 0.0799270787883722 "ENSG00000125931/ENSG00000114251" 2
GO:0032147 "GO:0032147" "activation of protein kinase activity" "7/160" "355/20505" 0.0216323517263437 0.104478934407338 0.0805752069941252 "ENSG00000110944/ENSG00000160712/ENSG00000165731/ENSG00000124493/ENSG00000121966/ENSG00000163235/ENSG00000114251" 7
GO:0030500 "GO:0030500" "regulation of bone mineralization" "3/160" "76/20505" 0.0216458920515716 0.104478934407338 0.0805752069941252 "ENSG00000177706/ENSG00000183023/ENSG00000162733" 3
GO:0030010 "GO:0030010" "establishment of cell polarity" "4/160" "136/20505" 0.0220123183405451 0.106072538955675 0.0818042108797159 "ENSG00000164690/ENSG00000103241/ENSG00000162849/ENSG00000114251" 4
GO:0051147 "GO:0051147" "regulation of muscle cell differentiation" "5/160" "204/20505" 0.0220766776199601 0.106207700721025 0.0819084489951084 "ENSG00000164690/ENSG00000198719/ENSG00000103241/ENSG00000154342/ENSG00000102678" 5
GO:0060411 "GO:0060411" "cardiac septum morphogenesis" "3/160" "77/20505" 0.0223975306939571 0.106597649588119 0.0822091814907207 "ENSG00000141448/ENSG00000107831/ENSG00000114251" 3
GO:0086001 "GO:0086001" "cardiac muscle cell action potential" "3/160" "77/20505" 0.0223975306939571 0.106597649588119 0.0822091814907207 "ENSG00000120457/ENSG00000183023/ENSG00000162989" 3
GO:0007179 "GO:0007179" "transforming growth factor beta receptor signaling pathway" "5/160" "205/20505" 0.02249077975528 0.106597649588119 0.0822091814907207 "ENSG00000243709/ENSG00000143768/ENSG00000156574/ENSG00000125931/ENSG00000168675" 5
GO:0098742 "GO:0098742" "cell-cell adhesion via plasma-membrane adhesion molecules" "6/160" "280/20505" 0.0227955433361397 0.106597649588119 0.0822091814907207 "ENSG00000204936/ENSG00000171815/ENSG00000165215/ENSG00000165731/ENSG00000165194/ENSG00000140937" 6
GO:0001573 "GO:0001573" "ganglioside metabolic process" "2/160" "30/20505" 0.0228137191939018 0.106597649588119 0.0822091814907207 "ENSG00000105855/ENSG00000148488" 2
GO:0007205 "GO:0007205" "protein kinase C-activating G protein-coupled receptor signaling pathway" "2/160" "30/20505" 0.0228137191939018 0.106597649588119 0.0822091814907207 "ENSG00000157680/ENSG00000058866" 2
GO:0007398 "GO:0007398" "ectoderm development" "2/160" "30/20505" 0.0228137191939018 0.106597649588119 0.0822091814907207 "ENSG00000273706/ENSG00000164690" 2
GO:0008299 "GO:0008299" "isoprenoid biosynthetic process" "2/160" "30/20505" 0.0228137191939018 0.106597649588119 0.0822091814907207 "ENSG00000184254/ENSG00000128918" 2
GO:0010800 "GO:0010800" "positive regulation of peptidyl-threonine phosphorylation" "2/160" "30/20505" 0.0228137191939018 0.106597649588119 0.0822091814907207 "ENSG00000103888/ENSG00000114251" 2
GO:0035116 "GO:0035116" "embryonic hindlimb morphogenesis" "2/160" "30/20505" 0.0228137191939018 0.106597649588119 0.0822091814907207 "ENSG00000164690/ENSG00000107831" 2
GO:0044550 "GO:0044550" "secondary metabolite biosynthetic process" "2/160" "30/20505" 0.0228137191939018 0.106597649588119 0.0822091814907207 "ENSG00000125931/ENSG00000114251" 2
GO:0060536 "GO:0060536" "cartilage morphogenesis" "2/160" "30/20505" 0.0228137191939018 0.106597649588119 0.0822091814907207 "ENSG00000165816/ENSG00000019549" 2
GO:0062009 "GO:0062009" "secondary palate development" "2/160" "30/20505" 0.0228137191939018 0.106597649588119 0.0822091814907207 "ENSG00000154342/ENSG00000114251" 2
GO:0086013 "GO:0086013" "membrane repolarization during cardiac muscle cell action potential" "2/160" "30/20505" 0.0228137191939018 0.106597649588119 0.0822091814907207 "ENSG00000120457/ENSG00000162989" 2
GO:0090162 "GO:0090162" "establishment of epithelial cell polarity" "2/160" "30/20505" 0.0228137191939018 0.106597649588119 0.0822091814907207 "ENSG00000103241/ENSG00000114251" 2
GO:1902668 "GO:1902668" "negative regulation of axon guidance" "2/160" "30/20505" 0.0228137191939018 0.106597649588119 0.0822091814907207 "ENSG00000154342/ENSG00000114251" 2
GO:1905606 "GO:1905606" "regulation of presynapse assembly" "2/160" "30/20505" 0.0228137191939018 0.106597649588119 0.0822091814907207 "ENSG00000141668/ENSG00000154342" 2
GO:2000108 "GO:2000108" "positive regulation of leukocyte apoptotic process" "2/160" "30/20505" 0.0228137191939018 0.106597649588119 0.0822091814907207 "ENSG00000131203/ENSG00000114251" 2
GO:0071902 "GO:0071902" "positive regulation of protein serine/threonine kinase activity" "7/160" "360/20505" 0.023131402207368 0.107886306639227 0.083203006793653 "ENSG00000103888/ENSG00000213231/ENSG00000165731/ENSG00000124493/ENSG00000121966/ENSG00000163235/ENSG00000114251" 7
GO:0021675 "GO:0021675" "nerve development" "3/160" "78/20505" 0.0231632822459605 0.107886306639227 0.083203006793653 "ENSG00000165462/ENSG00000165731/ENSG00000128652" 3
GO:0021954 "GO:0021954" "central nervous system neuron development" "3/160" "79/20505" 0.0239431447787863 0.111164600758651 0.0857312602521957 "ENSG00000107831/ENSG00000114251/ENSG00000140937" 3
GO:0048247 "GO:0048247" "lymphocyte chemotaxis" "3/160" "79/20505" 0.0239431447787863 0.111164600758651 0.0857312602521957 "ENSG00000145824/ENSG00000114251/ENSG00000006606" 3
GO:0030308 "GO:0030308" "negative regulation of cell growth" "5/160" "209/20505" 0.0241975433461771 0.11159134416261 0.0860603690653978 "ENSG00000164736/ENSG00000158825/ENSG00000165140/ENSG00000154342/ENSG00000114251" 5
GO:0001964 "GO:0001964" "startle response" "2/160" "31/20505" 0.0242639640640753 0.11159134416261 0.0860603690653978 "ENSG00000181195/ENSG00000183454" 2
GO:0021884 "GO:0021884" "forebrain neuron development" "2/160" "31/20505" 0.0242639640640753 0.11159134416261 0.0860603690653978 "ENSG00000107831/ENSG00000114251" 2
GO:0099174 "GO:0099174" "regulation of presynapse organization" "2/160" "31/20505" 0.0242639640640753 0.11159134416261 0.0860603690653978 "ENSG00000141668/ENSG00000154342" 2
GO:0099625 "GO:0099625" "ventricular cardiac muscle cell membrane repolarization" "2/160" "31/20505" 0.0242639640640753 0.11159134416261 0.0860603690653978 "ENSG00000120457/ENSG00000162989" 2
GO:1901623 "GO:1901623" "regulation of lymphocyte chemotaxis" "2/160" "31/20505" 0.0242639640640753 0.11159134416261 0.0860603690653978 "ENSG00000145824/ENSG00000114251" 2
GO:0021700 "GO:0021700" "developmental maturation" "6/160" "286/20505" 0.0249647715270046 0.114634154970939 0.0884070154215828 "ENSG00000177706/ENSG00000165731/ENSG00000074660/ENSG00000149922/ENSG00000128918/ENSG00000114251" 6
GO:0046683 "GO:0046683" "response to organophosphorus" "4/160" "142/20505" 0.0252984489888564 0.115984268483393 0.0894482365667699 "ENSG00000181195/ENSG00000100678/ENSG00000125931/ENSG00000183023" 4
GO:0002696 "GO:0002696" "positive regulation of leukocyte activation" "7/160" "367/20505" 0.0253487117834341 0.116032835628396 0.0894856920383812 "ENSG00000204936/ENSG00000164690/ENSG00000110944/ENSG00000198846/ENSG00000160712/ENSG00000154342/ENSG00000114251" 7
GO:0043536 "GO:0043536" "positive regulation of blood vessel endothelial cell migration" "3/160" "81/20505" 0.0255451810279023 0.116567323723267 0.0898978946429011 "ENSG00000128052/ENSG00000126561/ENSG00000176692" 3
GO:0051279 "GO:0051279" "regulation of release of sequestered calcium ion into cytosol" "3/160" "81/20505" 0.0255451810279023 0.116567323723267 0.0898978946429011 "ENSG00000103888/ENSG00000134817/ENSG00000183023" 3
GO:0009299 "GO:0009299" "mRNA transcription" "2/160" "32/20505" 0.0257509856821532 0.11714095353079 0.0903402837306283 "ENSG00000164736/ENSG00000135363" 2
GO:0060317 "GO:0060317" "cardiac epithelial to mesenchymal transition" "2/160" "32/20505" 0.0257509856821532 0.11714095353079 0.0903402837306283 "ENSG00000019549/ENSG00000107831" 2
GO:0032609 "GO:0032609" "interferon-gamma production" "4/160" "144/20505" 0.0264560079288783 0.120161216136598 0.0926695406858224 "ENSG00000163508/ENSG00000110944/ENSG00000160712/ENSG00000114251" 4
GO:0006766 "GO:0006766" "vitamin metabolic process" "4/160" "145/20505" 0.0270465356593499 0.121425918926978 0.0936448922215075 "ENSG00000101276/ENSG00000121207/ENSG00000019549/ENSG00000128918" 4
GO:0045598 "GO:0045598" "regulation of fat cell differentiation" "4/160" "145/20505" 0.0270465356593499 0.121425918926978 0.0936448922215075 "ENSG00000184344/ENSG00000019549/ENSG00000154342/ENSG00000114251" 4
GO:0003203 "GO:0003203" "endocardial cushion morphogenesis" "2/160" "33/20505" 0.0272741294820597 0.121425918926978 0.0936448922215075 "ENSG00000019549/ENSG00000107831" 2
GO:0008209 "GO:0008209" "androgen metabolic process" "2/160" "33/20505" 0.0272741294820597 0.121425918926978 0.0936448922215075 "ENSG00000164690/ENSG00000148926" 2
GO:0010092 "GO:0010092" "specification of animal organ identity" "2/160" "33/20505" 0.0272741294820597 0.121425918926978 0.0936448922215075 "ENSG00000154342/ENSG00000107831" 2
GO:0010818 "GO:0010818" "T cell chemotaxis" "2/160" "33/20505" 0.0272741294820597 0.121425918926978 0.0936448922215075 "ENSG00000114251/ENSG00000006606" 2
GO:0021522 "GO:0021522" "spinal cord motor neuron differentiation" "2/160" "33/20505" 0.0272741294820597 0.121425918926978 0.0936448922215075 "ENSG00000164690/ENSG00000165462" 2
GO:0021696 "GO:0021696" "cerebellar cortex morphogenesis" "2/160" "33/20505" 0.0272741294820597 0.121425918926978 0.0936448922215075 "ENSG00000273706/ENSG00000198719" 2
GO:0021772 "GO:0021772" "olfactory bulb development" "2/160" "33/20505" 0.0272741294820597 0.121425918926978 0.0936448922215075 "ENSG00000163508/ENSG00000114251" 2
GO:0030947 "GO:0030947" "regulation of vascular endothelial growth factor receptor signaling pathway" "2/160" "33/20505" 0.0272741294820597 0.121425918926978 0.0936448922215075 "ENSG00000152804/ENSG00000102678" 2
GO:0086011 "GO:0086011" "membrane repolarization during action potential" "2/160" "33/20505" 0.0272741294820597 0.121425918926978 0.0936448922215075 "ENSG00000120457/ENSG00000162989" 2
GO:1900115 "GO:1900115" "extracellular regulation of signal transduction" "2/160" "33/20505" 0.0272741294820597 0.121425918926978 0.0936448922215075 "ENSG00000104371/ENSG00000147869" 2
GO:1900116 "GO:1900116" "extracellular negative regulation of signal transduction" "2/160" "33/20505" 0.0272741294820597 0.121425918926978 0.0936448922215075 "ENSG00000104371/ENSG00000147869" 2
GO:0030098 "GO:0030098" "lymphocyte differentiation" "7/160" "374/20505" 0.0277078380600376 0.122982437519894 0.0948452950445821 "ENSG00000152804/ENSG00000163508/ENSG00000164690/ENSG00000110944/ENSG00000198846/ENSG00000100060/ENSG00000198719" 7
GO:0070482 "GO:0070482" "response to oxygen levels" "7/160" "374/20505" 0.0277078380600376 0.122982437519894 0.0948452950445821 "ENSG00000141448/ENSG00000165215/ENSG00000148926/ENSG00000121966/ENSG00000181195/ENSG00000100678/ENSG00000183023" 7
GO:0008589 "GO:0008589" "regulation of smoothened signaling pathway" "3/160" "84/20505" 0.0280538604698242 0.124007818137415 0.0956360789090345 "ENSG00000165588/ENSG00000164690/ENSG00000102678" 3
GO:0051289 "GO:0051289" "protein homotetramerization" "3/160" "84/20505" 0.0280538604698242 0.124007818137415 0.0956360789090345 "ENSG00000184254/ENSG00000158825/ENSG00000165140" 3
GO:0018105 "GO:0018105" "peptidyl-serine phosphorylation" "6/160" "294/20505" 0.0280660429425533 0.124007818137415 0.0956360789090345 "ENSG00000213231/ENSG00000105146/ENSG00000165731/ENSG00000009950/ENSG00000154342/ENSG00000114251" 6
GO:0002687 "GO:0002687" "positive regulation of leukocyte migration" "4/160" "147/20505" 0.0282511746876142 0.124637535386533 0.0961217231968838 "ENSG00000110944/ENSG00000160712/ENSG00000145824/ENSG00000114251" 4
GO:0045927 "GO:0045927" "positive regulation of growth" "6/160" "295/20505" 0.0284707957160541 0.125313209695986 0.0966428100327475 "ENSG00000141448/ENSG00000198719/ENSG00000197406/ENSG00000154342/ENSG00000107831/ENSG00000102678" 6
GO:0010762 "GO:0010762" "regulation of fibroblast migration" "2/160" "34/20505" 0.0288327487608199 0.125313209695986 0.0966428100327475 "ENSG00000183023/ENSG00000162733" 2
GO:0021988 "GO:0021988" "olfactory lobe development" "2/160" "34/20505" 0.0288327487608199 0.125313209695986 0.0966428100327475 "ENSG00000163508/ENSG00000114251" 2
GO:0042104 "GO:0042104" "positive regulation of activated T cell proliferation" "2/160" "34/20505" 0.0288327487608199 0.125313209695986 0.0966428100327475 "ENSG00000110944/ENSG00000160712" 2
GO:0042634 "GO:0042634" "regulation of hair cycle" "2/160" "34/20505" 0.0288327487608199 0.125313209695986 0.0966428100327475 "ENSG00000104371/ENSG00000114251" 2
GO:0045880 "GO:0045880" "positive regulation of smoothened signaling pathway" "2/160" "34/20505" 0.0288327487608199 0.125313209695986 0.0966428100327475 "ENSG00000164690/ENSG00000102678" 2
GO:0048713 "GO:0048713" "regulation of oligodendrocyte differentiation" "2/160" "34/20505" 0.0288327487608199 0.125313209695986 0.0966428100327475 "ENSG00000164690/ENSG00000121966" 2
GO:0048841 "GO:0048841" "regulation of axon extension involved in axon guidance" "2/160" "34/20505" 0.0288327487608199 0.125313209695986 0.0966428100327475 "ENSG00000154342/ENSG00000114251" 2
GO:0060218 "GO:0060218" "hematopoietic stem cell differentiation" "2/160" "34/20505" 0.0288327487608199 0.125313209695986 0.0966428100327475 "ENSG00000054598/ENSG00000135363" 2
GO:0086019 "GO:0086019" "cell-cell signaling involved in cardiac conduction" "2/160" "34/20505" 0.0288327487608199 0.125313209695986 0.0966428100327475 "ENSG00000120457/ENSG00000162989" 2
GO:0110110 "GO:0110110" "positive regulation of animal organ morphogenesis" "3/160" "85/20505" 0.0289181944883837 0.125498099226294 0.0967853987015559 "ENSG00000273706/ENSG00000154342/ENSG00000107831" 3
GO:0050867 "GO:0050867" "positive regulation of cell activation" "7/160" "380/20505" 0.0298455298368606 0.129330629293063 0.0997410845074344 "ENSG00000204936/ENSG00000164690/ENSG00000110944/ENSG00000198846/ENSG00000160712/ENSG00000154342/ENSG00000114251" 7
GO:0008016 "GO:0008016" "regulation of heart contraction" "5/160" "222/20505" 0.0303129280067729 0.130302559950428 0.100490647224028 "ENSG00000148926/ENSG00000120457/ENSG00000100678/ENSG00000183023/ENSG00000162989" 5
GO:1903708 "GO:1903708" "positive regulation of hemopoiesis" "5/160" "222/20505" 0.0303129280067729 0.130302559950428 0.100490647224028 "ENSG00000157368/ENSG00000164690/ENSG00000110944/ENSG00000198846/ENSG00000054598" 5
GO:0031128 "GO:0031128" "developmental induction" "2/160" "35/20505" 0.0304262045969717 0.130302559950428 0.100490647224028 "ENSG00000154342/ENSG00000107831" 2
GO:0033280 "GO:0033280" "response to vitamin D" "2/160" "35/20505" 0.0304262045969717 0.130302559950428 0.100490647224028 "ENSG00000181195/ENSG00000019549" 2
GO:0048048 "GO:0048048" "embryonic eye morphogenesis" "2/160" "35/20505" 0.0304262045969717 0.130302559950428 0.100490647224028 "ENSG00000184254/ENSG00000114251" 2
GO:0060428 "GO:0060428" "lung epithelium development" "2/160" "35/20505" 0.0304262045969717 0.130302559950428 0.100490647224028 "ENSG00000141448/ENSG00000164690" 2
GO:0071634 "GO:0071634" "regulation of transforming growth factor beta production" "2/160" "35/20505" 0.0304262045969717 0.130302559950428 0.100490647224028 "ENSG00000141448/ENSG00000105855" 2
GO:0097009 "GO:0097009" "energy homeostasis" "2/160" "35/20505" 0.0304262045969717 0.130302559950428 0.100490647224028 "ENSG00000009950/ENSG00000198719" 2
GO:0003158 "GO:0003158" "endothelium development" "4/160" "151/20505" 0.0307552202682954 0.131519034042053 0.101428804301257 "ENSG00000164736/ENSG00000101445/ENSG00000128052/ENSG00000198719" 4
GO:0034308 "GO:0034308" "primary alcohol metabolic process" "3/160" "88/20505" 0.0315952329319352 0.134717283273922 0.103895326335948 "ENSG00000184254/ENSG00000121207/ENSG00000128918" 3
GO:1901224 "GO:1901224" "positive regulation of NIK/NF-kappaB signaling" "3/160" "88/20505" 0.0315952329319352 0.134717283273922 0.103895326335948 "ENSG00000110944/ENSG00000142405/ENSG00000135960" 3
GO:0003417 "GO:0003417" "growth plate cartilage development" "2/160" "36/20505" 0.0320538657697599 0.135688014379298 0.10464396394596 "ENSG00000147869/ENSG00000165816" 2
GO:0035115 "GO:0035115" "embryonic forelimb morphogenesis" "2/160" "36/20505" 0.0320538657697599 0.135688014379298 0.10464396394596 "ENSG00000164690/ENSG00000128918" 2
GO:0042987 "GO:0042987" "amyloid precursor protein catabolic process" "2/160" "36/20505" 0.0320538657697599 0.135688014379298 0.10464396394596 "ENSG00000160179/ENSG00000262655" 2
GO:0007259 "GO:0007259" "JAK-STAT cascade" "4/160" "153/20505" 0.032054843738836 0.135688014379298 0.10464396394596 "ENSG00000110944/ENSG00000160712/ENSG00000165731/ENSG00000126561" 4
GO:0007605 "GO:0007605" "sensory perception of sound" "4/160" "153/20505" 0.032054843738836 0.135688014379298 0.10464396394596 "ENSG00000103888/ENSG00000101276/ENSG00000196767/ENSG00000019549" 4
GO:0051146 "GO:0051146" "striated muscle cell differentiation" "6/160" "304/20505" 0.032287856432534 0.136476849805147 0.105252321775054 "ENSG00000141448/ENSG00000164690/ENSG00000198719/ENSG00000154342/ENSG00000183023/ENSG00000134853" 6
GO:0048644 "GO:0048644" "muscle organ morphogenesis" "3/160" "89/20505" 0.0325155070129703 0.137240776353446 0.105841469626787 "ENSG00000133937/ENSG00000054598/ENSG00000114251" 3
GO:0001889 "GO:0001889" "liver development" "4/160" "154/20505" 0.0327165964560193 0.137890554227459 0.106342584870695 "ENSG00000156574/ENSG00000141448/ENSG00000128918/ENSG00000154342" 4
GO:0032729 "GO:0032729" "positive regulation of interferon-gamma production" "3/160" "90/20505" 0.0334496971805223 0.140080529668153 0.108031515997788 "ENSG00000110944/ENSG00000160712/ENSG00000114251" 3
GO:0048709 "GO:0048709" "oligodendrocyte differentiation" "3/160" "90/20505" 0.0334496971805223 0.140080529668153 0.108031515997788 "ENSG00000164690/ENSG00000121966/ENSG00000100678" 3
GO:0090068 "GO:0090068" "positive regulation of cell cycle process" "6/160" "307/20505" 0.0336308198672786 0.140080529668153 0.108031515997788 "ENSG00000255192/ENSG00000141448/ENSG00000105146/ENSG00000163235/ENSG00000107831/ENSG00000114251" 6
GO:0009112 "GO:0009112" "nucleobase metabolic process" "2/160" "37/20505" 0.0337151086791042 0.140080529668153 0.108031515997788 "ENSG00000158825/ENSG00000137198" 2
GO:0030501 "GO:0030501" "positive regulation of bone mineralization" "2/160" "37/20505" 0.0337151086791042 0.140080529668153 0.108031515997788 "ENSG00000177706/ENSG00000183023" 2
GO:0033144 "GO:0033144" "negative regulation of intracellular steroid hormone receptor signaling pathway" "2/160" "37/20505" 0.0337151086791042 0.140080529668153 0.108031515997788 "ENSG00000156574/ENSG00000169297" 2
GO:0043368 "GO:0043368" "positive T cell selection" "2/160" "37/20505" 0.0337151086791042 0.140080529668153 0.108031515997788 "ENSG00000164690/ENSG00000110944" 2
GO:0060045 "GO:0060045" "positive regulation of cardiac muscle cell proliferation" "2/160" "37/20505" 0.0337151086791042 0.140080529668153 0.108031515997788 "ENSG00000141448/ENSG00000102678" 2
GO:0060441 "GO:0060441" "epithelial tube branching involved in lung morphogenesis" "2/160" "37/20505" 0.0337151086791042 0.140080529668153 0.108031515997788 "ENSG00000164690/ENSG00000103241" 2
GO:0071604 "GO:0071604" "transforming growth factor beta production" "2/160" "37/20505" 0.0337151086791042 0.140080529668153 0.108031515997788 "ENSG00000141448/ENSG00000105855" 2
GO:0043393 "GO:0043393" "regulation of protein binding" "5/160" "229/20505" 0.0339747943830322 0.140929697159643 0.108686402523838 "ENSG00000100060/ENSG00000102096/ENSG00000154342/ENSG00000114251/ENSG00000262655" 5
GO:0008277 "GO:0008277" "regulation of G protein-coupled receptor signaling pathway" "4/160" "156/20505" 0.0340640327835446 0.140929697159643 0.108686402523838 "ENSG00000148926/ENSG00000182732/ENSG00000134817/ENSG00000114251" 4
GO:0014074 "GO:0014074" "response to purine-containing compound" "4/160" "156/20505" 0.0340640327835446 0.140929697159643 0.108686402523838 "ENSG00000181195/ENSG00000100678/ENSG00000125931/ENSG00000183023" 4
GO:0032642 "GO:0032642" "regulation of chemokine production" "3/160" "91/20505" 0.0343977713446196 0.141709128426778 0.109287507770971 "ENSG00000160712/ENSG00000019549/ENSG00000114251" 3
GO:0050918 "GO:0050918" "positive chemotaxis" "3/160" "91/20505" 0.0343977713446196 0.141709128426778 0.109287507770971 "ENSG00000128052/ENSG00000107831/ENSG00000114251" 3
GO:0070509 "GO:0070509" "calcium ion import" "3/160" "91/20505" 0.0343977713446196 0.141709128426778 0.109287507770971 "ENSG00000100678/ENSG00000183023/ENSG00000198216" 3
GO:0097696 "GO:0097696" "STAT cascade" "4/160" "157/20505" 0.0347497334942301 0.142957764374997 0.110250468396084 "ENSG00000110944/ENSG00000160712/ENSG00000165731/ENSG00000126561" 4
GO:0034765 "GO:0034765" "regulation of ion transmembrane transport" "8/160" "480/20505" 0.03494347092059 0.143552882644278 0.110709429602047 "ENSG00000103888/ENSG00000124780/ENSG00000120457/ENSG00000185760/ENSG00000134817/ENSG00000183023/ENSG00000162989/ENSG00000198216" 8
GO:0051899 "GO:0051899" "membrane depolarization" "3/160" "92/20505" 0.0353596952441316 0.144653984642507 0.111558610558306 "ENSG00000128052/ENSG00000183023/ENSG00000198216" 3
GO:0010874 "GO:0010874" "regulation of cholesterol efflux" "2/160" "38/20505" 0.0354093172663366 0.144653984642507 0.111558610558306 "ENSG00000164690/ENSG00000160179" 2
GO:0043094 "GO:0043094" "cellular metabolic compound salvage" "2/160" "38/20505" 0.0354093172663366 0.144653984642507 0.111558610558306 "ENSG00000158825/ENSG00000137198" 2
GO:1901532 "GO:1901532" "regulation of hematopoietic progenitor cell differentiation" "2/160" "38/20505" 0.0354093172663366 0.144653984642507 0.111558610558306 "ENSG00000054598/ENSG00000135363" 2
GO:0030510 "GO:0030510" "regulation of BMP signaling pathway" "3/160" "93/20505" 0.0363354324958739 0.148023871936534 0.114157501596038 "ENSG00000147869/ENSG00000184344/ENSG00000114251" 3
GO:0070167 "GO:0070167" "regulation of biomineral tissue development" "3/160" "93/20505" 0.0363354324958739 0.148023871936534 0.114157501596038 "ENSG00000177706/ENSG00000183023/ENSG00000162733" 3
GO:0030879 "GO:0030879" "mammary gland development" "4/160" "160/20505" 0.0368548513018662 0.14993107101246 0.115628352741233 "ENSG00000126561/ENSG00000103241/ENSG00000154342/ENSG00000114251" 4
GO:0070232 "GO:0070232" "regulation of T cell apoptotic process" "2/160" "39/20505" 0.0371358829356975 0.150031018766458 0.115705433456237 "ENSG00000131203/ENSG00000114251" 2
GO:0070741 "GO:0070741" "response to interleukin-6" "2/160" "39/20505" 0.0371358829356975 0.150031018766458 0.115705433456237 "ENSG00000160712/ENSG00000125931" 2
GO:0090050 "GO:0090050" "positive regulation of cell migration involved in sprouting angiogenesis" "2/160" "39/20505" 0.0371358829356975 0.150031018766458 0.115705433456237 "ENSG00000128052/ENSG00000176692" 2
GO:2000036 "GO:2000036" "regulation of stem cell population maintenance" "2/160" "39/20505" 0.0371358829356975 0.150031018766458 0.115705433456237 "ENSG00000156574/ENSG00000147596" 2
GO:2000826 "GO:2000826" "regulation of heart morphogenesis" "2/160" "39/20505" 0.0371358829356975 0.150031018766458 0.115705433456237 "ENSG00000054598/ENSG00000154342" 2
GO:0007584 "GO:0007584" "response to nutrient" "5/160" "235/20505" 0.0373235732260638 0.150379425731044 0.115974128418039 "ENSG00000121207/ENSG00000181195/ENSG00000019549/ENSG00000128918/ENSG00000183023" 5
GO:0007215 "GO:0007215" "glutamate receptor signaling pathway" "3/160" "94/20505" 0.0373249446429872 0.150379425731044 0.115974128418039 "ENSG00000139874/ENSG00000124493/ENSG00000183454" 3
GO:0072330 "GO:0072330" "monocarboxylic acid biosynthetic process" "6/160" "315/20505" 0.0373877500495341 0.150425266705485 0.116009481439443 "ENSG00000184254/ENSG00000131203/ENSG00000165140/ENSG00000009950/ENSG00000179148/ENSG00000128918" 6
GO:0031214 "GO:0031214" "biomineral tissue development" "4/160" "161/20505" 0.0375725815028946 0.150961264966987 0.116422848699687 "ENSG00000147869/ENSG00000177706/ENSG00000183023/ENSG00000162733" 4
GO:0046631 "GO:0046631" "alpha-beta T cell activation" "4/160" "162/20505" 0.038298331360109 0.153666144346116 0.118508878932515 "ENSG00000163508/ENSG00000164690/ENSG00000110944/ENSG00000160712" 4
GO:0001569 "GO:0001569" "branching involved in blood vessel morphogenesis" "2/160" "40/20505" 0.0388942044765867 0.154993934732992 0.119532884258318 "ENSG00000164690/ENSG00000107831" 2
GO:0045197 "GO:0045197" "establishment or maintenance of epithelial cell apical/basal polarity" "2/160" "40/20505" 0.0388942044765867 0.154993934732992 0.119532884258318 "ENSG00000103241/ENSG00000114251" 2
GO:0048286 "GO:0048286" "lung alveolus development" "2/160" "40/20505" 0.0388942044765867 0.154993934732992 0.119532884258318 "ENSG00000141448/ENSG00000103241" 2
GO:0051281 "GO:0051281" "positive regulation of release of sequestered calcium ion into cytosol" "2/160" "40/20505" 0.0388942044765867 0.154993934732992 0.119532884258318 "ENSG00000103888/ENSG00000134817" 2
GO:0086005 "GO:0086005" "ventricular cardiac muscle cell action potential" "2/160" "40/20505" 0.0388942044765867 0.154993934732992 0.119532884258318 "ENSG00000120457/ENSG00000162989" 2
GO:0030203 "GO:0030203" "glycosaminoglycan metabolic process" "4/160" "163/20505" 0.0390321042010283 0.15533184324899 0.119793482710782 "ENSG00000103888/ENSG00000156966/ENSG00000107742/ENSG00000054598" 4
GO:0006140 "GO:0006140" "regulation of nucleotide metabolic process" "3/160" "97/20505" 0.0403757157787784 0.159945950753617 0.123351928912281 "ENSG00000158825/ENSG00000165140/ENSG00000009950" 3
GO:0043473 "GO:0043473" "pigmentation" "3/160" "97/20505" 0.0403757157787784 0.159945950753617 0.123351928912281 "ENSG00000019549/ENSG00000135960/ENSG00000125931" 3
GO:0006110 "GO:0006110" "regulation of glycolytic process" "2/160" "41/20505" 0.0406836879865611 0.159945950753617 0.123351928912281 "ENSG00000165140/ENSG00000009950" 2
GO:0017145 "GO:0017145" "stem cell division" "2/160" "41/20505" 0.0406836879865611 0.159945950753617 0.123351928912281 "ENSG00000164736/ENSG00000154342" 2
GO:0021587 "GO:0021587" "cerebellum morphogenesis" "2/160" "41/20505" 0.0406836879865611 0.159945950753617 0.123351928912281 "ENSG00000273706/ENSG00000198719" 2
GO:0035137 "GO:0035137" "hindlimb morphogenesis" "2/160" "41/20505" 0.0406836879865611 0.159945950753617 0.123351928912281 "ENSG00000164690/ENSG00000107831" 2
GO:0050919 "GO:0050919" "negative chemotaxis" "2/160" "41/20505" 0.0406836879865611 0.159945950753617 0.123351928912281 "ENSG00000187122/ENSG00000114251" 2
GO:0086091 "GO:0086091" "regulation of heart rate by cardiac conduction" "2/160" "41/20505" 0.0406836879865611 0.159945950753617 0.123351928912281 "ENSG00000120457/ENSG00000162989" 2
GO:1990573 "GO:1990573" "potassium ion import across plasma membrane" "2/160" "41/20505" 0.0406836879865611 0.159945950753617 0.123351928912281 "ENSG00000120457/ENSG00000162989" 2
GO:1905952 "GO:1905952" "regulation of lipid localization" "4/160" "166/20505" 0.0412815821819282 0.162078695143812 0.124996722876541 "ENSG00000164690/ENSG00000121207/ENSG00000160179/ENSG00000106484" 4
GO:0006898 "GO:0006898" "receptor-mediated endocytosis" "6/160" "323/20505" 0.0414039910112606 0.162186367633156 0.125079760985282 "ENSG00000148926/ENSG00000099994/ENSG00000074660/ENSG00000198719/ENSG00000154342/ENSG00000168079" 6
GO:0048145 "GO:0048145" "regulation of fibroblast proliferation" "3/160" "98/20505" 0.0414199031186213 0.162186367633156 0.125079760985282 "ENSG00000114251/ENSG00000162733/ENSG00000134853" 3
GO:0045444 "GO:0045444" "fat cell differentiation" "5/160" "243/20505" 0.0420941961407144 0.164606315122446 0.126946048873559 "ENSG00000184344/ENSG00000019549/ENSG00000179148/ENSG00000154342/ENSG00000114251" 5
GO:0032602 "GO:0032602" "chemokine production" "3/160" "99/20505" 0.0424776436079541 0.165323749169664 0.127499341239978 "ENSG00000160712/ENSG00000019549/ENSG00000114251" 3
GO:0048144 "GO:0048144" "fibroblast proliferation" "3/160" "99/20505" 0.0424776436079541 0.165323749169664 0.127499341239978 "ENSG00000114251/ENSG00000162733/ENSG00000134853" 3
GO:0090263 "GO:0090263" "positive regulation of canonical Wnt signaling pathway" "3/160" "99/20505" 0.0424776436079541 0.165323749169664 0.127499341239978 "ENSG00000146374/ENSG00000154342/ENSG00000102678" 3
GO:0030811 "GO:0030811" "regulation of nucleotide catabolic process" "2/160" "42/20505" 0.0425037467950726 0.165323749169664 0.127499341239978 "ENSG00000165140/ENSG00000009950" 2
GO:0001738 "GO:0001738" "morphogenesis of a polarized epithelium" "3/160" "100/20505" 0.0435488873242663 0.168703291353298 0.130105678225864 "ENSG00000146374/ENSG00000103241/ENSG00000114251" 3
GO:0014020 "GO:0014020" "primary neural tube formation" "3/160" "100/20505" 0.0435488873242663 0.168703291353298 0.130105678225864 "ENSG00000156574/ENSG00000148926/ENSG00000114251" 3
GO:0050729 "GO:0050729" "positive regulation of inflammatory response" "4/160" "169/20505" 0.0436033122266987 0.168703291353298 0.130105678225864 "ENSG00000131203/ENSG00000110944/ENSG00000142405/ENSG00000114251" 4
GO:2001056 "GO:2001056" "positive regulation of cysteine-type endopeptidase activity" "4/160" "169/20505" 0.0436033122266987 0.168703291353298 0.130105678225864 "ENSG00000156574/ENSG00000142405/ENSG00000154342/ENSG00000183454" 4
GO:0010761 "GO:0010761" "fibroblast migration" "2/160" "43/20505" 0.0443538013879388 0.170631178048345 0.131592483871382 "ENSG00000183023/ENSG00000162733" 2
GO:0035088 "GO:0035088" "establishment or maintenance of apical/basal cell polarity" "2/160" "43/20505" 0.0443538013879388 0.170631178048345 0.131592483871382 "ENSG00000103241/ENSG00000114251" 2
GO:0061245 "GO:0061245" "establishment or maintenance of bipolar cell polarity" "2/160" "43/20505" 0.0443538013879388 0.170631178048345 0.131592483871382 "ENSG00000103241/ENSG00000114251" 2
GO:0099622 "GO:0099622" "cardiac muscle cell membrane repolarization" "2/160" "43/20505" 0.0443538013879388 0.170631178048345 0.131592483871382 "ENSG00000120457/ENSG00000162989" 2
GO:0045216 "GO:0045216" "cell-cell junction organization" "4/160" "170/20505" 0.0443932740153131 0.170631178048345 0.131592483871382 "ENSG00000204936/ENSG00000165215/ENSG00000019549/ENSG00000140937" 4
GO:0010522 "GO:0010522" "regulation of calcium ion transport into cytosol" "3/160" "101/20505" 0.044633582590427 0.171105149511139 0.13195801543945 "ENSG00000103888/ENSG00000134817/ENSG00000183023" 3
GO:0070098 "GO:0070098" "chemokine-mediated signaling pathway" "3/160" "101/20505" 0.044633582590427 0.171105149511139 0.13195801543945 "ENSG00000121966/ENSG00000054598/ENSG00000006606" 3
GO:0010634 "GO:0010634" "positive regulation of epithelial cell migration" "4/160" "171/20505" 0.0451912576748 0.173016267930353 0.133431889221681 "ENSG00000128052/ENSG00000126561/ENSG00000176692/ENSG00000114251" 4
GO:0046632 "GO:0046632" "alpha-beta T cell differentiation" "3/160" "102/20505" 0.0457316760175673 0.174493344577655 0.134571025615804 "ENSG00000163508/ENSG00000164690/ENSG00000110944" 3
GO:0060047 "GO:0060047" "heart contraction" "5/160" "249/20505" 0.0459035308171355 0.174493344577655 0.134571025615804 "ENSG00000148926/ENSG00000120457/ENSG00000100678/ENSG00000183023/ENSG00000162989" 5
GO:0006022 "GO:0006022" "aminoglycan metabolic process" "4/160" "172/20505" 0.0459972596858795 0.174493344577655 0.134571025615804 "ENSG00000103888/ENSG00000156966/ENSG00000107742/ENSG00000054598" 4
GO:0007156 "GO:0007156" "homophilic cell adhesion via plasma membrane adhesion molecules" "4/160" "172/20505" 0.0459972596858795 0.174493344577655 0.134571025615804 "ENSG00000171815/ENSG00000165731/ENSG00000165194/ENSG00000140937" 4
GO:0050954 "GO:0050954" "sensory perception of mechanical stimulus" "4/160" "172/20505" 0.0459972596858795 0.174493344577655 0.134571025615804 "ENSG00000103888/ENSG00000101276/ENSG00000196767/ENSG00000019549" 4
GO:1902107 "GO:1902107" "positive regulation of leukocyte differentiation" "4/160" "172/20505" 0.0459972596858795 0.174493344577655 0.134571025615804 "ENSG00000157368/ENSG00000164690/ENSG00000110944/ENSG00000198846" 4
GO:0010799 "GO:0010799" "regulation of peptidyl-threonine phosphorylation" "2/160" "44/20505" 0.046233279332541 0.174493344577655 0.134571025615804 "ENSG00000103888/ENSG00000114251" 2
GO:0030517 "GO:0030517" "negative regulation of axon extension" "2/160" "44/20505" 0.046233279332541 0.174493344577655 0.134571025615804 "ENSG00000154342/ENSG00000114251" 2
GO:0043300 "GO:0043300" "regulation of leukocyte degranulation" "2/160" "44/20505" 0.046233279332541 0.174493344577655 0.134571025615804 "ENSG00000204936/ENSG00000103241" 2
GO:0045684 "GO:0045684" "positive regulation of epidermis development" "2/160" "44/20505" 0.046233279332541 0.174493344577655 0.134571025615804 "ENSG00000054598/ENSG00000114251" 2
GO:0071364 "GO:0071364" "cellular response to epidermal growth factor stimulus" "2/160" "44/20505" 0.046233279332541 0.174493344577655 0.134571025615804 "ENSG00000054598/ENSG00000019549" 2
GO:0006941 "GO:0006941" "striated muscle contraction" "4/160" "174/20505" 0.0476333010348824 0.179545625679164 0.138467395710463 "ENSG00000120457/ENSG00000100678/ENSG00000183023/ENSG00000162989" 4
GO:0001523 "GO:0001523" "retinoid metabolic process" "3/160" "104/20505" 0.0479678354933762 0.180299903291862 0.139049102205834 "ENSG00000184254/ENSG00000121207/ENSG00000128918" 3
GO:0042088 "GO:0042088" "T-helper 1 type immune response" "2/160" "45/20505" 0.0481416152037417 0.180299903291862 0.139049102205834 "ENSG00000110944/ENSG00000160712" 2
GO:0045687 "GO:0045687" "positive regulation of glial cell differentiation" "2/160" "45/20505" 0.0481416152037417 0.180299903291862 0.139049102205834 "ENSG00000164690/ENSG00000121966" 2
GO:0048483 "GO:0048483" "autonomic nervous system development" "2/160" "45/20505" 0.0481416152037417 0.180299903291862 0.139049102205834 "ENSG00000165462/ENSG00000165731" 2
GO:1902667 "GO:1902667" "regulation of axon guidance" "2/160" "45/20505" 0.0481416152037417 0.180299903291862 0.139049102205834 "ENSG00000154342/ENSG00000114251" 2
GO:0030168 "GO:0030168" "platelet activation" "4/160" "175/20505" 0.0484633297017304 0.181272684626038 0.139799320972955 "ENSG00000157680/ENSG00000058866/ENSG00000154342/ENSG00000134853" 4
GO:0010107 "GO:0010107" "potassium ion import" "2/160" "46/20505" 0.0500782505105157 0.18612310386691 0.143540013166636 "ENSG00000120457/ENSG00000162989" 2
GO:0021575 "GO:0021575" "hindbrain morphogenesis" "2/160" "46/20505" 0.0500782505105157 0.18612310386691 0.143540013166636 "ENSG00000273706/ENSG00000198719" 2
GO:0060351 "GO:0060351" "cartilage development involved in endochondral bone morphogenesis" "2/160" "46/20505" 0.0500782505105157 0.18612310386691 0.143540013166636 "ENSG00000147869/ENSG00000165816" 2
GO:0070169 "GO:0070169" "positive regulation of biomineral tissue development" "2/160" "46/20505" 0.0500782505105157 0.18612310386691 0.143540013166636 "ENSG00000177706/ENSG00000183023" 2
GO:0090102 "GO:0090102" "cochlea development" "2/160" "46/20505" 0.0500782505105157 0.18612310386691 0.143540013166636 "ENSG00000196767/ENSG00000114251" 2
GO:0045787 "GO:0045787" "positive regulation of cell cycle" "7/160" "427/20505" 0.0505007744690754 0.187455285941682 0.144567405406397 "ENSG00000255192/ENSG00000141448/ENSG00000105146/ENSG00000009950/ENSG00000163235/ENSG00000107831/ENSG00000114251" 7
GO:0051235 "GO:0051235" "maintenance of location" "6/160" "340/20505" 0.0508172232116676 0.188390846507133 0.145288919141623 "ENSG00000147869/ENSG00000103888/ENSG00000160179/ENSG00000134817/ENSG00000183023/ENSG00000106484" 6
GO:0003015 "GO:0003015" "heart process" "5/160" "257/20505" 0.0512933134272215 0.189915116170409 0.146464451265204 "ENSG00000148926/ENSG00000120457/ENSG00000100678/ENSG00000183023/ENSG00000162989" 5
GO:0030301 "GO:0030301" "cholesterol transport" "3/160" "107/20505" 0.0514211324036584 0.190147676713907 0.14664380429974 "ENSG00000164690/ENSG00000160179/ENSG00000118777" 3
GO:0048469 "GO:0048469" "cell maturation" "4/160" "179/20505" 0.051863339941847 0.191237064507686 0.147483951143489 "ENSG00000177706/ENSG00000165731/ENSG00000074660/ENSG00000149922" 4
GO:0050671 "GO:0050671" "positive regulation of lymphocyte proliferation" "4/160" "179/20505" 0.051863339941847 0.191237064507686 0.147483951143489 "ENSG00000164690/ENSG00000110944/ENSG00000160712/ENSG00000154342" 4
GO:0035136 "GO:0035136" "forelimb morphogenesis" "2/160" "47/20505" 0.0520426336232882 0.191237064507686 0.147483951143489 "ENSG00000164690/ENSG00000128918" 2
GO:0046189 "GO:0046189" "phenol-containing compound biosynthetic process" "2/160" "47/20505" 0.0520426336232882 0.191237064507686 0.147483951143489 "ENSG00000125931/ENSG00000114251" 2
GO:0046638 "GO:0046638" "positive regulation of alpha-beta T cell differentiation" "2/160" "47/20505" 0.0520426336232882 0.191237064507686 0.147483951143489 "ENSG00000164690/ENSG00000110944" 2
GO:0001841 "GO:0001841" "neural tube formation" "3/160" "108/20505" 0.0525984030143254 0.193036799017443 0.14887192453239 "ENSG00000156574/ENSG00000148926/ENSG00000114251" 3
GO:0032946 "GO:0032946" "positive regulation of mononuclear cell proliferation" "4/160" "180/20505" 0.0527332755954535 0.193289262051004 0.14906662656781 "ENSG00000164690/ENSG00000110944/ENSG00000160712/ENSG00000154342" 4
GO:0006665 "GO:0006665" "sphingolipid metabolic process" "4/160" "181/20505" 0.0536111657548174 0.195606550282516 0.150853742602045 "ENSG00000172296/ENSG00000105855/ENSG00000179148/ENSG00000148488" 4
GO:0035637 "GO:0035637" "multicellular organismal signaling" "4/160" "181/20505" 0.0536111657548174 0.195606550282516 0.150853742602045 "ENSG00000120457/ENSG00000100678/ENSG00000183023/ENSG00000162989" 4
GO:1990868 "GO:1990868" "response to chemokine" "3/160" "109/20505" 0.0537886536030029 0.195606550282516 0.150853742602045 "ENSG00000121966/ENSG00000054598/ENSG00000006606" 3
GO:1990869 "GO:1990869" "cellular response to chemokine" "3/160" "109/20505" 0.0537886536030029 0.195606550282516 0.150853742602045 "ENSG00000121966/ENSG00000054598/ENSG00000006606" 3
GO:0009409 "GO:0009409" "response to cold" "2/160" "48/20505" 0.0540342197019737 0.195606550282516 0.150853742602045 "ENSG00000148926/ENSG00000137198" 2
GO:0035850 "GO:0035850" "epithelial cell differentiation involved in kidney development" "2/160" "48/20505" 0.0540342197019737 0.195606550282516 0.150853742602045 "ENSG00000273706/ENSG00000125931" 2
GO:0046006 "GO:0046006" "regulation of activated T cell proliferation" "2/160" "48/20505" 0.0540342197019737 0.195606550282516 0.150853742602045 "ENSG00000110944/ENSG00000160712" 2
GO:0070849 "GO:0070849" "response to epidermal growth factor" "2/160" "48/20505" 0.0540342197019737 0.195606550282516 0.150853742602045 "ENSG00000054598/ENSG00000019549" 2
GO:1903587 "GO:1903587" "regulation of blood vessel endothelial cell proliferation involved in sprouting angiogenesis" "2/160" "48/20505" 0.0540342197019737 0.195606550282516 0.150853742602045 "ENSG00000101445/ENSG00000134817" 2
GO:2000403 "GO:2000403" "positive regulation of lymphocyte migration" "2/160" "48/20505" 0.0540342197019737 0.195606550282516 0.150853742602045 "ENSG00000145824/ENSG00000114251" 2
GO:0006672 "GO:0006672" "ceramide metabolic process" "3/160" "110/20505" 0.0549918185544424 0.198092449842049 0.152770893391457 "ENSG00000105855/ENSG00000179148/ENSG00000148488" 3
GO:0016101 "GO:0016101" "diterpenoid metabolic process" "3/160" "110/20505" 0.0549918185544424 0.198092449842049 0.152770893391457 "ENSG00000184254/ENSG00000121207/ENSG00000128918" 3
GO:0055017 "GO:0055017" "cardiac muscle tissue growth" "3/160" "110/20505" 0.0549918185544424 0.198092449842049 0.152770893391457 "ENSG00000141448/ENSG00000054598/ENSG00000102678" 3
GO:0060079 "GO:0060079" "excitatory postsynaptic potential" "3/160" "110/20505" 0.0549918185544424 0.198092449842049 0.152770893391457 "ENSG00000157680/ENSG00000183454/ENSG00000188828" 3
GO:0046394 "GO:0046394" "carboxylic acid biosynthetic process" "7/160" "437/20505" 0.0558316493304259 0.200587478212048 0.154695084411487 "ENSG00000184254/ENSG00000103888/ENSG00000131203/ENSG00000165140/ENSG00000009950/ENSG00000179148/ENSG00000128918" 7
GO:0021545 "GO:0021545" "cranial nerve development" "2/160" "49/20505" 0.0560524706247076 0.200587478212048 0.154695084411487 "ENSG00000165462/ENSG00000128652" 2
GO:0030850 "GO:0030850" "prostate gland development" "2/160" "49/20505" 0.0560524706247076 0.200587478212048 0.154695084411487 "ENSG00000164690/ENSG00000114251" 2
GO:0043470 "GO:0043470" "regulation of carbohydrate catabolic process" "2/160" "49/20505" 0.0560524706247076 0.200587478212048 0.154695084411487 "ENSG00000165140/ENSG00000009950" 2
GO:0060976 "GO:0060976" "coronary vasculature development" "2/160" "49/20505" 0.0560524706247076 0.200587478212048 0.154695084411487 "ENSG00000141448/ENSG00000134817" 2
GO:0003279 "GO:0003279" "cardiac septum development" "3/160" "111/20505" 0.0562078308993323 0.200587478212048 0.154695084411487 "ENSG00000141448/ENSG00000107831/ENSG00000114251" 3
GO:0045621 "GO:0045621" "positive regulation of lymphocyte differentiation" "3/160" "111/20505" 0.0562078308993323 0.200587478212048 0.154695084411487 "ENSG00000164690/ENSG00000110944/ENSG00000198846" 3
GO:0048771 "GO:0048771" "tissue remodeling" "4/160" "184/20505" 0.0562924543921098 0.200587478212048 0.154695084411487 "ENSG00000110944/ENSG00000146374/ENSG00000054598/ENSG00000107831" 4
GO:0033002 "GO:0033002" "muscle cell proliferation" "5/160" "264/20505" 0.0563016477306296 0.200587478212048 0.154695084411487 "ENSG00000141448/ENSG00000164690/ENSG00000160712/ENSG00000054598/ENSG00000102678" 5
GO:0016053 "GO:0016053" "organic acid biosynthetic process" "7/160" "438/20505" 0.0563833485864524 0.200634178364201 0.1547311000394 "ENSG00000184254/ENSG00000103888/ENSG00000131203/ENSG00000165140/ENSG00000009950/ENSG00000179148/ENSG00000128918" 7
GO:0060349 "GO:0060349" "bone morphogenesis" "3/160" "112/20505" 0.0574366223510423 0.204133803617009 0.157430046298246 "ENSG00000147869/ENSG00000165816/ENSG00000054598" 3
GO:0045058 "GO:0045058" "T cell selection" "2/160" "50/20505" 0.0580968549172674 0.205810725001054 0.158723304967075 "ENSG00000164690/ENSG00000110944" 2
GO:0050718 "GO:0050718" "positive regulation of interleukin-1 beta secretion" "2/160" "50/20505" 0.0580968549172674 0.205810725001054 0.158723304967075 "ENSG00000142405/ENSG00000114251" 2
GO:0070665 "GO:0070665" "positive regulation of leukocyte proliferation" "4/160" "186/20505" 0.0581195414874771 0.205810725001054 0.158723304967075 "ENSG00000164690/ENSG00000110944/ENSG00000160712/ENSG00000154342" 4
GO:1903522 "GO:1903522" "regulation of blood circulation" "5/160" "267/20505" 0.0585316489027632 0.207019435357415 0.159655474573438 "ENSG00000148926/ENSG00000120457/ENSG00000100678/ENSG00000183023/ENSG00000162989" 5
GO:0043433 "GO:0043433" "negative regulation of DNA-binding transcription factor activity" "4/160" "187/20505" 0.0590449138763472 0.208582576193618 0.160860984537264 "ENSG00000163508/ENSG00000142405/ENSG00000149922/ENSG00000169297" 4
GO:0050905 "GO:0050905" "neuromuscular process" "3/160" "114/20505" 0.059932263058263 0.210260489215393 0.162155007967103 "ENSG00000184254/ENSG00000181195/ENSG00000183454" 3
GO:1903510 "GO:1903510" "mucopolysaccharide metabolic process" "3/160" "114/20505" 0.059932263058263 0.210260489215393 0.162155007967103 "ENSG00000103888/ENSG00000156966/ENSG00000107742" 3
GO:0002285 "GO:0002285" "lymphocyte activation involved in immune response" "4/160" "188/20505" 0.0599781530810155 0.210260489215393 0.162155007967103 "ENSG00000163508/ENSG00000110944/ENSG00000100060/ENSG00000198719" 4
GO:0046474 "GO:0046474" "glycerophospholipid biosynthetic process" "5/160" "269/20505" 0.0600461545560619 0.210260489215393 0.162155007967103 "ENSG00000281028/ENSG00000186895/ENSG00000107831/ENSG00000158815/ENSG00000102678" 5
GO:0021695 "GO:0021695" "cerebellar cortex development" "2/160" "51/20505" 0.0601668476831741 0.210260489215393 0.162155007967103 "ENSG00000273706/ENSG00000198719" 2
GO:0035315 "GO:0035315" "hair cell differentiation" "2/160" "51/20505" 0.0601668476831741 0.210260489215393 0.162155007967103 "ENSG00000164093/ENSG00000198719" 2
GO:0086009 "GO:0086009" "membrane repolarization" "2/160" "51/20505" 0.0601668476831741 0.210260489215393 0.162155007967103 "ENSG00000120457/ENSG00000162989" 2
GO:2000677 "GO:2000677" "regulation of transcription regulatory region DNA binding" "2/160" "51/20505" 0.0601668476831741 0.210260489215393 0.162155007967103 "ENSG00000054598/ENSG00000154342" 2
GO:2001169 "GO:2001169" "regulation of ATP biosynthetic process" "2/160" "51/20505" 0.0601668476831741 0.210260489215393 0.162155007967103 "ENSG00000165140/ENSG00000009950" 2
GO:0050770 "GO:0050770" "regulation of axonogenesis" "4/160" "189/20505" 0.0609192440044199 0.212635786053613 0.163986860823354 "ENSG00000165731/ENSG00000154342/ENSG00000076356/ENSG00000114251" 4
GO:0021761 "GO:0021761" "limbic system development" "3/160" "115/20505" 0.0611989694766355 0.213357551512704 0.164543493618255 "ENSG00000184254/ENSG00000169297/ENSG00000154342" 3
GO:2000116 "GO:2000116" "regulation of cysteine-type endopeptidase activity" "5/160" "271/20505" 0.0615829110023508 0.2144404936689 0.16537866952135 "ENSG00000240065/ENSG00000156574/ENSG00000142405/ENSG00000154342/ENSG00000183454" 5
GO:0001954 "GO:0001954" "positive regulation of cell-matrix adhesion" "2/160" "52/20505" 0.0622619305344686 0.215522067234699 0.166212789953742 "ENSG00000128052/ENSG00000146904" 2
GO:0032735 "GO:0032735" "positive regulation of interleukin-12 production" "2/160" "52/20505" 0.0622619305344686 0.215522067234699 0.166212789953742 "ENSG00000131203/ENSG00000110944" 2
GO:0045840 "GO:0045840" "positive regulation of mitotic nuclear division" "2/160" "52/20505" 0.0622619305344686 0.215522067234699 0.166212789953742 "ENSG00000163235/ENSG00000107831" 2
GO:0050798 "GO:0050798" "activated T cell proliferation" "2/160" "52/20505" 0.0622619305344686 0.215522067234699 0.166212789953742 "ENSG00000110944/ENSG00000160712" 2
GO:1905209 "GO:1905209" "positive regulation of cardiocyte differentiation" "2/160" "52/20505" 0.0622619305344686 0.215522067234699 0.166212789953742 "ENSG00000141448/ENSG00000154342" 2
GO:0030148 "GO:0030148" "sphingolipid biosynthetic process" "3/160" "116/20505" 0.0624781693970967 0.216014947383579 0.166592904091052 "ENSG00000172296/ENSG00000179148/ENSG00000148488" 3
GO:0015918 "GO:0015918" "sterol transport" "3/160" "117/20505" 0.0637697884777884 0.219960650115013 0.169635869796302 "ENSG00000164690/ENSG00000160179/ENSG00000118777" 3
GO:0060419 "GO:0060419" "heart growth" "3/160" "117/20505" 0.0637697884777884 0.219960650115013 0.169635869796302 "ENSG00000141448/ENSG00000054598/ENSG00000102678" 3
GO:0050670 "GO:0050670" "regulation of lymphocyte proliferation" "5/160" "274/20505" 0.0639297145608631 0.220252550165518 0.169860986056574 "ENSG00000164690/ENSG00000131203/ENSG00000110944/ENSG00000160712/ENSG00000154342" 5
GO:0042982 "GO:0042982" "amyloid precursor protein metabolic process" "2/160" "53/20505" 0.0643815915231582 0.221288078972077 0.170659596306671 "ENSG00000160179/ENSG00000262655" 2
GO:0045104 "GO:0045104" "intermediate filament cytoskeleton organization" "2/160" "53/20505" 0.0643815915231582 0.221288078972077 0.170659596306671 "ENSG00000164690/ENSG00000170484" 2
GO:0032944 "GO:0032944" "regulation of mononuclear cell proliferation" "5/160" "275/20505" 0.0647230797963547 0.222200714089598 0.171363429705446 "ENSG00000164690/ENSG00000131203/ENSG00000110944/ENSG00000160712/ENSG00000154342" 5
GO:0070997 "GO:0070997" "neuron death" "6/160" "362/20505" 0.0648064748060227 0.222226188520066 0.171383075842916 "ENSG00000124493/ENSG00000125931/ENSG00000197406/ENSG00000154342/ENSG00000107831/ENSG00000114251" 6
GO:0046634 "GO:0046634" "regulation of alpha-beta T cell activation" "3/160" "118/20505" 0.0650737512682247 0.222881408032268 0.171888387733028 "ENSG00000164690/ENSG00000110944/ENSG00000160712" 3
GO:0006816 "GO:0006816" "calcium ion transport" "7/160" "454/20505" 0.0656744040598307 0.224675592836263 0.173272081132924 "ENSG00000103888/ENSG00000100678/ENSG00000154342/ENSG00000134817/ENSG00000183023/ENSG00000183454/ENSG00000198216" 7
GO:0099565 "GO:0099565" "chemical synaptic transmission, postsynaptic" "3/160" "119/20505" 0.0663899812421777 0.225738487052757 0.174091795862909 "ENSG00000157680/ENSG00000183454/ENSG00000188828" 3
GO:0002886 "GO:0002886" "regulation of myeloid leukocyte mediated immunity" "2/160" "54/20505" 0.0665253250733252 0.225738487052757 0.174091795862909 "ENSG00000204936/ENSG00000103241" 2
GO:0010524 "GO:0010524" "positive regulation of calcium ion transport into cytosol" "2/160" "54/20505" 0.0665253250733252 0.225738487052757 0.174091795862909 "ENSG00000103888/ENSG00000134817" 2
GO:0010883 "GO:0010883" "regulation of lipid storage" "2/160" "54/20505" 0.0665253250733252 0.225738487052757 0.174091795862909 "ENSG00000160179/ENSG00000106484" 2
GO:0045103 "GO:0045103" "intermediate filament-based process" "2/160" "54/20505" 0.0665253250733252 0.225738487052757 0.174091795862909 "ENSG00000164690/ENSG00000170484" 2
GO:0055023 "GO:0055023" "positive regulation of cardiac muscle tissue growth" "2/160" "54/20505" 0.0665253250733252 0.225738487052757 0.174091795862909 "ENSG00000141448/ENSG00000102678" 2
GO:0070231 "GO:0070231" "T cell apoptotic process" "2/160" "54/20505" 0.0665253250733252 0.225738487052757 0.174091795862909 "ENSG00000131203/ENSG00000114251" 2
GO:0002062 "GO:0002062" "chondrocyte differentiation" "3/160" "120/20505" 0.0677184008300416 0.229013403685306 0.17661744456954 "ENSG00000165816/ENSG00000019549/ENSG00000102678" 3
GO:0050731 "GO:0050731" "positive regulation of peptidyl-tyrosine phosphorylation" "4/160" "196/20505" 0.0677253313462528 0.229013403685306 0.17661744456954 "ENSG00000110944/ENSG00000160712/ENSG00000163235/ENSG00000154342" 4
GO:1901343 "GO:1901343" "negative regulation of vasculature development" "4/160" "196/20505" 0.0677253313462528 0.229013403685306 0.17661744456954 "ENSG00000152804/ENSG00000186340/ENSG00000054598/ENSG00000102678" 4
GO:0002043 "GO:0002043" "blood vessel endothelial cell proliferation involved in sprouting angiogenesis" "2/160" "55/20505" 0.0686926319138921 0.231481507313519 0.178520870957399 "ENSG00000101445/ENSG00000134817" 2
GO:0046579 "GO:0046579" "positive regulation of Ras protein signal transduction" "2/160" "55/20505" 0.0686926319138921 0.231481507313519 0.178520870957399 "ENSG00000157680/ENSG00000139679" 2
GO:0051196 "GO:0051196" "regulation of coenzyme metabolic process" "2/160" "55/20505" 0.0686926319138921 0.231481507313519 0.178520870957399 "ENSG00000165140/ENSG00000009950" 2
GO:0043200 "GO:0043200" "response to amino acid" "3/160" "121/20505" 0.069058931450678 0.232448071913962 0.179266295316823 "ENSG00000204262/ENSG00000188828/ENSG00000134853" 3
GO:0031589 "GO:0031589" "cell-substrate adhesion" "6/160" "370/20505" 0.0704034825221483 0.233758256747768 0.180276723062696 "ENSG00000128052/ENSG00000146904/ENSG00000107742/ENSG00000128652/ENSG00000165816/ENSG00000103241" 6
GO:0062012 "GO:0062012" "regulation of small molecule metabolic process" "6/160" "370/20505" 0.0704034825221483 0.233758256747768 0.180276723062696 "ENSG00000160180/ENSG00000158825/ENSG00000165140/ENSG00000009950/ENSG00000160179/ENSG00000019549" 6
GO:0048675 "GO:0048675" "axon extension" "3/160" "122/20505" 0.0704114935427526 0.233758256747768 0.180276723062696 "ENSG00000154342/ENSG00000187122/ENSG00000114251" 3
GO:0051209 "GO:0051209" "release of sequestered calcium ion into cytosol" "3/160" "122/20505" 0.0704114935427526 0.233758256747768 0.180276723062696 "ENSG00000103888/ENSG00000134817/ENSG00000183023" 3
GO:0010950 "GO:0010950" "positive regulation of endopeptidase activity" "4/160" "199/20505" 0.0707582397449433 0.233758256747768 0.180276723062696 "ENSG00000156574/ENSG00000142405/ENSG00000154342/ENSG00000183454" 4
GO:0031102 "GO:0031102" "neuron projection regeneration" "2/160" "56/20505" 0.0708830190120387 0.233758256747768 0.180276723062696 "ENSG00000148926/ENSG00000074660" 2
GO:0050716 "GO:0050716" "positive regulation of interleukin-1 secretion" "2/160" "56/20505" 0.0708830190120387 0.233758256747768 0.180276723062696 "ENSG00000142405/ENSG00000114251" 2
GO:0060043 "GO:0060043" "regulation of cardiac muscle cell proliferation" "2/160" "56/20505" 0.0708830190120387 0.233758256747768 0.180276723062696 "ENSG00000141448/ENSG00000102678" 2
GO:0045666 "GO:0045666" "positive regulation of neuron differentiation" "6/160" "373/20505" 0.0725724864876934 0.233758256747768 0.180276723062696 "ENSG00000165731/ENSG00000074660/ENSG00000128652/ENSG00000154342/ENSG00000076356/ENSG00000114251" 6
GO:0010976 "GO:0010976" "positive regulation of neuron projection development" "5/160" "285/20505" 0.0729606653833422 0.233758256747768 0.180276723062696 "ENSG00000165731/ENSG00000074660/ENSG00000154342/ENSG00000076356/ENSG00000114251" 5
GO:0045744 "GO:0045744" "negative regulation of G protein-coupled receptor signaling pathway" "2/160" "57/20505" 0.0730959995072623 0.233758256747768 0.180276723062696 "ENSG00000148926/ENSG00000134817" 2
GO:0051181 "GO:0051181" "cofactor transport" "2/160" "57/20505" 0.0730959995072623 0.233758256747768 0.180276723062696 "ENSG00000118777/ENSG00000145832" 2
GO:0051283 "GO:0051283" "negative regulation of sequestering of calcium ion" "3/160" "124/20505" 0.0731523891793999 0.233758256747768 0.180276723062696 "ENSG00000103888/ENSG00000134817/ENSG00000183023" 3
GO:0090130 "GO:0090130" "tissue migration" "6/160" "375/20505" 0.0740397042911653 0.233758256747768 0.180276723062696 "ENSG00000128052/ENSG00000126561/ENSG00000176692/ENSG00000103241/ENSG00000107831/ENSG00000114251" 6
GO:0014066 "GO:0014066" "regulation of phosphatidylinositol 3-kinase signaling" "3/160" "125/20505" 0.0745405589753411 0.233758256747768 0.180276723062696 "ENSG00000101445/ENSG00000128052/ENSG00000134853" 3
GO:0006486 "GO:0006486" "protein glycosylation" "5/160" "287/20505" 0.074674178235554 0.233758256747768 0.180276723062696 "ENSG00000182050/ENSG00000156966/ENSG00000100060/ENSG00000176928/ENSG00000148488" 5
GO:0043413 "GO:0043413" "macromolecule glycosylation" "5/160" "287/20505" 0.074674178235554 0.233758256747768 0.180276723062696 "ENSG00000182050/ENSG00000156966/ENSG00000100060/ENSG00000176928/ENSG00000148488" 5
GO:0070663 "GO:0070663" "regulation of leukocyte proliferation" "5/160" "287/20505" 0.074674178235554 0.233758256747768 0.180276723062696 "ENSG00000164690/ENSG00000131203/ENSG00000110944/ENSG00000160712/ENSG00000154342" 5
GO:0007565 "GO:0007565" "female pregnancy" "4/160" "203/20505" 0.0749090522374074 0.233758256747768 0.180276723062696 "ENSG00000156574/ENSG00000131203/ENSG00000147596/ENSG00000148926" 4
GO:0007566 "GO:0007566" "embryo implantation" "2/160" "58/20505" 0.0753310926460786 0.233758256747768 0.180276723062696 "ENSG00000156574/ENSG00000147596" 2
GO:0045599 "GO:0045599" "negative regulation of fat cell differentiation" "2/160" "58/20505" 0.0753310926460786 0.233758256747768 0.180276723062696 "ENSG00000154342/ENSG00000114251" 2
GO:0055081 "GO:0055081" "anion homeostasis" "2/160" "58/20505" 0.0753310926460786 0.233758256747768 0.180276723062696 "ENSG00000009950/ENSG00000160179" 2
GO:0060421 "GO:0060421" "positive regulation of heart growth" "2/160" "58/20505" 0.0753310926460786 0.233758256747768 0.180276723062696 "ENSG00000141448/ENSG00000102678" 2
GO:0061098 "GO:0061098" "positive regulation of protein tyrosine kinase activity" "2/160" "58/20505" 0.0753310926460786 0.233758256747768 0.180276723062696 "ENSG00000163235/ENSG00000154342" 2
GO:0086002 "GO:0086002" "cardiac muscle cell action potential involved in contraction" "2/160" "58/20505" 0.0753310926460786 0.233758256747768 0.180276723062696 "ENSG00000120457/ENSG00000162989" 2
GO:1903779 "GO:1903779" "regulation of cardiac conduction" "2/160" "58/20505" 0.0753310926460786 0.233758256747768 0.180276723062696 "ENSG00000100678/ENSG00000183023" 2
GO:2000242 "GO:2000242" "negative regulation of reproductive process" "2/160" "58/20505" 0.0753310926460786 0.233758256747768 0.180276723062696 "ENSG00000156574/ENSG00000114251" 2
GO:0001553 "GO:0001553" "luteinization" "1/160" "10/20505" 0.0753620636284258 0.233758256747768 0.180276723062696 "ENSG00000134853" 1
GO:0001787 "GO:0001787" "natural killer cell proliferation" "1/160" "10/20505" 0.0753620636284258 0.233758256747768 0.180276723062696 "ENSG00000110944" 1
GO:0001840 "GO:0001840" "neural plate development" "1/160" "10/20505" 0.0753620636284258 0.233758256747768 0.180276723062696 "ENSG00000107831" 1
GO:0002934 "GO:0002934" "desmosome organization" "1/160" "10/20505" 0.0753620636284258 0.233758256747768 0.180276723062696 "ENSG00000019549" 1
GO:0003344 "GO:0003344" "pericardium morphogenesis" "1/160" "10/20505" 0.0753620636284258 0.233758256747768 0.180276723062696 "ENSG00000114251" 1
GO:0015886 "GO:0015886" "heme transport" "1/160" "10/20505" 0.0753620636284258 0.233758256747768 0.180276723062696 "ENSG00000118777" 1
GO:0021702 "GO:0021702" "cerebellar Purkinje cell differentiation" "1/160" "10/20505" 0.0753620636284258 0.233758256747768 0.180276723062696 "ENSG00000273706" 1
GO:0021924 "GO:0021924" "cell proliferation in external granule layer" "1/160" "10/20505" 0.0753620636284258 0.233758256747768 0.180276723062696 "ENSG00000164690" 1
GO:0021930 "GO:0021930" "cerebellar granule cell precursor proliferation" "1/160" "10/20505" 0.0753620636284258 0.233758256747768 0.180276723062696 "ENSG00000164690" 1
GO:0030309 "GO:0030309" "poly-N-acetyllactosamine metabolic process" "1/160" "10/20505" 0.0753620636284258 0.233758256747768 0.180276723062696 "ENSG00000156966" 1
GO:0030917 "GO:0030917" "midbrain-hindbrain boundary development" "1/160" "10/20505" 0.0753620636284258 0.233758256747768 0.180276723062696 "ENSG00000107831" 1
GO:0030948 "GO:0030948" "negative regulation of vascular endothelial growth factor receptor signaling pathway" "1/160" "10/20505" 0.0753620636284258 0.233758256747768 0.180276723062696 "ENSG00000152804" 1
GO:0032621 "GO:0032621" "interleukin-18 production" "1/160" "10/20505" 0.0753620636284258 0.233758256747768 0.180276723062696 "ENSG00000142405" 1
GO:0032908 "GO:0032908" "regulation of transforming growth factor beta1 production" "1/160" "10/20505" 0.0753620636284258 0.233758256747768 0.180276723062696 "ENSG00000141448" 1
GO:0032926 "GO:0032926" "negative regulation of activin receptor signaling pathway" "1/160" "10/20505" 0.0753620636284258 0.233758256747768 0.180276723062696 "ENSG00000147869" 1
GO:0034350 "GO:0034350" "regulation of glial cell apoptotic process" "1/160" "10/20505" 0.0753620636284258 0.233758256747768 0.180276723062696 "ENSG00000198719" 1
GO:0042428 "GO:0042428" "serotonin metabolic process" "1/160" "10/20505" 0.0753620636284258 0.233758256747768 0.180276723062696 "ENSG00000183454" 1
GO:0042670 "GO:0042670" "retinal cone cell differentiation" "1/160" "10/20505" 0.0753620636284258 0.233758256747768 0.180276723062696 "ENSG00000197406" 1
GO:0042756 "GO:0042756" "drinking behavior" "1/160" "10/20505" 0.0753620636284258 0.233758256747768 0.180276723062696 "ENSG00000198598" 1
GO:0043313 "GO:0043313" "regulation of neutrophil degranulation" "1/160" "10/20505" 0.0753620636284258 0.233758256747768 0.180276723062696 "ENSG00000204936" 1
GO:0044557 "GO:0044557" "relaxation of smooth muscle" "1/160" "10/20505" 0.0753620636284258 0.233758256747768 0.180276723062696 "ENSG00000183023" 1
GO:0045607 "GO:0045607" "regulation of inner ear auditory receptor cell differentiation" "1/160" "10/20505" 0.0753620636284258 0.233758256747768 0.180276723062696 "ENSG00000198719" 1
GO:0045631 "GO:0045631" "regulation of mechanoreceptor differentiation" "1/160" "10/20505" 0.0753620636284258 0.233758256747768 0.180276723062696 "ENSG00000198719" 1
GO:0045741 "GO:0045741" "positive regulation of epidermal growth factor-activated receptor activity" "1/160" "10/20505" 0.0753620636284258 0.233758256747768 0.180276723062696 "ENSG00000163235" 1
GO:0046532 "GO:0046532" "regulation of photoreceptor cell differentiation" "1/160" "10/20505" 0.0753620636284258 0.233758256747768 0.180276723062696 "ENSG00000197406" 1
GO:0046549 "GO:0046549" "retinal cone cell development" "1/160" "10/20505" 0.0753620636284258 0.233758256747768 0.180276723062696 "ENSG00000197406" 1
GO:0048570 "GO:0048570" "notochord morphogenesis" "1/160" "10/20505" 0.0753620636284258 0.233758256747768 0.180276723062696 "ENSG00000114251" 1
GO:0048793 "GO:0048793" "pronephros development" "1/160" "10/20505" 0.0753620636284258 0.233758256747768 0.180276723062696 "ENSG00000273706" 1
GO:0051256 "GO:0051256" "mitotic spindle midzone assembly" "1/160" "10/20505" 0.0753620636284258 0.233758256747768 0.180276723062696 "ENSG00000105146" 1
GO:0051481 "GO:0051481" "negative regulation of cytosolic calcium ion concentration" "1/160" "10/20505" 0.0753620636284258 0.233758256747768 0.180276723062696 "ENSG00000183023" 1
GO:0055091 "GO:0055091" "phospholipid homeostasis" "1/160" "10/20505" 0.0753620636284258 0.233758256747768 0.180276723062696 "ENSG00000160179" 1
GO:0060923 "GO:0060923" "cardiac muscle cell fate commitment" "1/160" "10/20505" 0.0753620636284258 0.233758256747768 0.180276723062696 "ENSG00000154342" 1
GO:0061140 "GO:0061140" "lung secretory cell differentiation" "1/160" "10/20505" 0.0753620636284258 0.233758256747768 0.180276723062696 "ENSG00000141448" 1
GO:0070572 "GO:0070572" "positive regulation of neuron projection regeneration" "1/160" "10/20505" 0.0753620636284258 0.233758256747768 0.180276723062696 "ENSG00000074660" 1
GO:0072033 "GO:0072033" "renal vesicle formation" "1/160" "10/20505" 0.0753620636284258 0.233758256747768 0.180276723062696 "ENSG00000162849" 1
GO:0072050 "GO:0072050" "S-shaped body morphogenesis" "1/160" "10/20505" 0.0753620636284258 0.233758256747768 0.180276723062696 "ENSG00000273706" 1
GO:0072203 "GO:0072203" "cell proliferation involved in metanephros development" "1/160" "10/20505" 0.0753620636284258 0.233758256747768 0.180276723062696 "ENSG00000164690" 1
GO:0072217 "GO:0072217" "negative regulation of metanephros development" "1/160" "10/20505" 0.0753620636284258 0.233758256747768 0.180276723062696 "ENSG00000125931" 1
GO:0072497 "GO:0072497" "mesenchymal stem cell differentiation" "1/160" "10/20505" 0.0753620636284258 0.233758256747768 0.180276723062696 "ENSG00000134853" 1
GO:0090193 "GO:0090193" "positive regulation of glomerulus development" "1/160" "10/20505" 0.0753620636284258 0.233758256747768 0.180276723062696 "ENSG00000165731" 1
GO:0090205 "GO:0090205" "positive regulation of cholesterol metabolic process" "1/160" "10/20505" 0.0753620636284258 0.233758256747768 0.180276723062696 "ENSG00000160179" 1
GO:0099566 "GO:0099566" "regulation of postsynaptic cytosolic calcium ion concentration" "1/160" "10/20505" 0.0753620636284258 0.233758256747768 0.180276723062696 "ENSG00000114251" 1
GO:1900376 "GO:1900376" "regulation of secondary metabolite biosynthetic process" "1/160" "10/20505" 0.0753620636284258 0.233758256747768 0.180276723062696 "ENSG00000114251" 1
GO:1902474 "GO:1902474" "positive regulation of protein localization to synapse" "1/160" "10/20505" 0.0753620636284258 0.233758256747768 0.180276723062696 "ENSG00000114251" 1
GO:2000035 "GO:2000035" "regulation of stem cell division" "1/160" "10/20505" 0.0753620636284258 0.233758256747768 0.180276723062696 "ENSG00000164736" 1
GO:2000288 "GO:2000288" "positive regulation of myoblast proliferation" "1/160" "10/20505" 0.0753620636284258 0.233758256747768 0.180276723062696 "ENSG00000141448" 1
GO:2000980 "GO:2000980" "regulation of inner ear receptor cell differentiation" "1/160" "10/20505" 0.0753620636284258 0.233758256747768 0.180276723062696 "ENSG00000198719" 1
GO:0051282 "GO:0051282" "regulation of sequestering of calcium ion" "3/160" "126/20505" 0.0759404328046631 0.235302718171228 0.181467827275193 "ENSG00000103888/ENSG00000134817/ENSG00000183023" 3
GO:0003231 "GO:0003231" "cardiac ventricle development" "3/160" "127/20505" 0.0773519266576987 0.238637628152747 0.184039743457071 "ENSG00000054598/ENSG00000103241/ENSG00000114251" 3
GO:0032649 "GO:0032649" "regulation of interferon-gamma production" "3/160" "127/20505" 0.0773519266576987 0.238637628152747 0.184039743457071 "ENSG00000110944/ENSG00000160712/ENSG00000114251" 3
GO:1901222 "GO:1901222" "regulation of NIK/NF-kappaB signaling" "3/160" "127/20505" 0.0773519266576987 0.238637628152747 0.184039743457071 "ENSG00000110944/ENSG00000142405/ENSG00000135960" 3
GO:1990266 "GO:1990266" "neutrophil migration" "3/160" "127/20505" 0.0773519266576987 0.238637628152747 0.184039743457071 "ENSG00000204936/ENSG00000110944/ENSG00000006606" 3
GO:0002763 "GO:0002763" "positive regulation of myeloid leukocyte differentiation" "2/160" "59/20505" 0.0775878237173547 0.238637628152747 0.184039743457071 "ENSG00000157368/ENSG00000110944" 2
GO:0007405 "GO:0007405" "neuroblast proliferation" "2/160" "59/20505" 0.0775878237173547 0.238637628152747 0.184039743457071 "ENSG00000164690/ENSG00000154342" 2
GO:2000725 "GO:2000725" "regulation of cardiac muscle cell differentiation" "2/160" "59/20505" 0.0775878237173547 0.238637628152747 0.184039743457071 "ENSG00000198719/ENSG00000154342" 2
GO:0006721 "GO:0006721" "terpenoid metabolic process" "3/160" "128/20505" 0.0787749557222519 0.240801293674252 0.185708384109374 "ENSG00000184254/ENSG00000121207/ENSG00000128918" 3
GO:0032368 "GO:0032368" "regulation of lipid transport" "3/160" "128/20505" 0.0787749557222519 0.240801293674252 0.185708384109374 "ENSG00000164690/ENSG00000121207/ENSG00000160179" 3
GO:0002066 "GO:0002066" "columnar/cuboidal epithelial cell development" "2/160" "60/20505" 0.0798657239882693 0.240801293674252 0.185708384109374 "ENSG00000198719/ENSG00000114251" 2
GO:0009311 "GO:0009311" "oligosaccharide metabolic process" "2/160" "60/20505" 0.0798657239882693 0.240801293674252 0.185708384109374 "ENSG00000165140/ENSG00000148488" 2
GO:0032731 "GO:0032731" "positive regulation of interleukin-1 beta production" "2/160" "60/20505" 0.0798657239882693 0.240801293674252 0.185708384109374 "ENSG00000142405/ENSG00000114251" 2
GO:2001239 "GO:2001239" "regulation of extrinsic apoptotic signaling pathway in absence of ligand" "2/160" "60/20505" 0.0798657239882693 0.240801293674252 0.185708384109374 "ENSG00000165731/ENSG00000019549" 2
GO:0019932 "GO:0019932" "second-messenger-mediated signaling" "7/160" "476/20505" 0.0798836156407442 0.240801293674252 0.185708384109374 "ENSG00000128052/ENSG00000173698/ENSG00000148926/ENSG00000121966/ENSG00000134817/ENSG00000183023/ENSG00000183454" 7
GO:0030183 "GO:0030183" "B cell differentiation" "3/160" "129/20505" 0.0802094344115438 0.240801293674252 0.185708384109374 "ENSG00000152804/ENSG00000100060/ENSG00000198719" 3
GO:0045446 "GO:0045446" "endothelial cell differentiation" "3/160" "129/20505" 0.0802094344115438 0.240801293674252 0.185708384109374 "ENSG00000164736/ENSG00000101445/ENSG00000198719" 3
GO:0051208 "GO:0051208" "sequestering of calcium ion" "3/160" "129/20505" 0.0802094344115438 0.240801293674252 0.185708384109374 "ENSG00000103888/ENSG00000134817/ENSG00000183023" 3
GO:0042326 "GO:0042326" "negative regulation of phosphorylation" "7/160" "477/20505" 0.08056899252869 0.240801293674252 0.185708384109374 "ENSG00000152804/ENSG00000142405/ENSG00000146904/ENSG00000165140/ENSG00000009950/ENSG00000185614/ENSG00000168675" 7
GO:0032102 "GO:0032102" "negative regulation of response to external stimulus" "6/160" "384/20505" 0.0808516088504157 0.240801293674252 0.185708384109374 "ENSG00000142405/ENSG00000019549/ENSG00000103241/ENSG00000154342/ENSG00000114251/ENSG00000134853" 6
GO:0051260 "GO:0051260" "protein homooligomerization" "6/160" "384/20505" 0.0808516088504157 0.240801293674252 0.185708384109374 "ENSG00000184254/ENSG00000165215/ENSG00000158825/ENSG00000165140/ENSG00000165816/ENSG00000168079" 6
GO:0043406 "GO:0043406" "positive regulation of MAP kinase activity" "5/160" "295/20505" 0.0817461656709481 0.240801293674252 0.185708384109374 "ENSG00000165731/ENSG00000124493/ENSG00000121966/ENSG00000163235/ENSG00000114251" 5
GO:1903706 "GO:1903706" "regulation of hemopoiesis" "7/160" "479/20505" 0.081950029983727 0.240801293674252 0.185708384109374 "ENSG00000157368/ENSG00000164690/ENSG00000110944/ENSG00000198846/ENSG00000054598/ENSG00000198719/ENSG00000135363" 7
GO:0002287 "GO:0002287" "alpha-beta T cell activation involved in immune response" "2/160" "61/20505" 0.0821643306408947 0.240801293674252 0.185708384109374 "ENSG00000163508/ENSG00000110944" 2
GO:0002293 "GO:0002293" "alpha-beta T cell differentiation involved in immune response" "2/160" "61/20505" 0.0821643306408947 0.240801293674252 0.185708384109374 "ENSG00000163508/ENSG00000110944" 2
GO:0032370 "GO:0032370" "positive regulation of lipid transport" "2/160" "61/20505" 0.0821643306408947 0.240801293674252 0.185708384109374 "ENSG00000121207/ENSG00000160179" 2
GO:0042733 "GO:0042733" "embryonic digit morphogenesis" "2/160" "61/20505" 0.0821643306408947 0.240801293674252 0.185708384109374 "ENSG00000164690/ENSG00000114251" 2
GO:0046148 "GO:0046148" "pigment biosynthetic process" "2/160" "61/20505" 0.0821643306408947 0.240801293674252 0.185708384109374 "ENSG00000125931/ENSG00000114251" 2
GO:0006107 "GO:0006107" "oxaloacetate metabolic process" "1/160" "11/20505" 0.0825805105578942 0.240801293674252 0.185708384109374 "ENSG00000126561" 1
GO:0006569 "GO:0006569" "tryptophan catabolic process" "1/160" "11/20505" 0.0825805105578942 0.240801293674252 0.185708384109374 "ENSG00000131203" 1
GO:0006600 "GO:0006600" "creatine metabolic process" "1/160" "11/20505" 0.0825805105578942 0.240801293674252 0.185708384109374 "ENSG00000126561" 1
GO:0010872 "GO:0010872" "regulation of cholesterol esterification" "1/160" "11/20505" 0.0825805105578942 0.240801293674252 0.185708384109374 "ENSG00000160179" 1
GO:0021534 "GO:0021534" "cell proliferation in hindbrain" "1/160" "11/20505" 0.0825805105578942 0.240801293674252 0.185708384109374 "ENSG00000164690" 1
GO:0021548 "GO:0021548" "pons development" "1/160" "11/20505" 0.0825805105578942 0.240801293674252 0.185708384109374 "ENSG00000165462" 1
GO:0021694 "GO:0021694" "cerebellar Purkinje cell layer formation" "1/160" "11/20505" 0.0825805105578942 0.240801293674252 0.185708384109374 "ENSG00000273706" 1
GO:0030388 "GO:0030388" "fructose 1,6-bisphosphate metabolic process" "1/160" "11/20505" 0.0825805105578942 0.240801293674252 0.185708384109374 "ENSG00000165140" 1
GO:0032905 "GO:0032905" "transforming growth factor beta1 production" "1/160" "11/20505" 0.0825805105578942 0.240801293674252 0.185708384109374 "ENSG00000141448" 1
GO:0033089 "GO:0033089" "positive regulation of T cell differentiation in thymus" "1/160" "11/20505" 0.0825805105578942 0.240801293674252 0.185708384109374 "ENSG00000164690" 1
GO:0033629 "GO:0033629" "negative regulation of cell adhesion mediated by integrin" "1/160" "11/20505" 0.0825805105578942 0.240801293674252 0.185708384109374 "ENSG00000019549" 1
GO:0035404 "GO:0035404" "histone-serine phosphorylation" "1/160" "11/20505" 0.0825805105578942 0.240801293674252 0.185708384109374 "ENSG00000105146" 1
GO:0038007 "GO:0038007" "netrin-activated signaling pathway" "1/160" "11/20505" 0.0825805105578942 0.240801293674252 0.185708384109374 "ENSG00000182168" 1
GO:0042436 "GO:0042436" "indole-containing compound catabolic process" "1/160" "11/20505" 0.0825805105578942 0.240801293674252 0.185708384109374 "ENSG00000131203" 1
GO:0043097 "GO:0043097" "pyrimidine nucleoside salvage" "1/160" "11/20505" 0.0825805105578942 0.240801293674252 0.185708384109374 "ENSG00000158825" 1
GO:0046218 "GO:0046218" "indolalkylamine catabolic process" "1/160" "11/20505" 0.0825805105578942 0.240801293674252 0.185708384109374 "ENSG00000131203" 1
GO:0048262 "GO:0048262" "determination of dorsal/ventral asymmetry" "1/160" "11/20505" 0.0825805105578942 0.240801293674252 0.185708384109374 "ENSG00000147869" 1
GO:0048263 "GO:0048263" "determination of dorsal identity" "1/160" "11/20505" 0.0825805105578942 0.240801293674252 0.185708384109374 "ENSG00000147869" 1
GO:0048703 "GO:0048703" "embryonic viscerocranium morphogenesis" "1/160" "11/20505" 0.0825805105578942 0.240801293674252 0.185708384109374 "ENSG00000273706" 1
GO:0060677 "GO:0060677" "ureteric bud elongation" "1/160" "11/20505" 0.0825805105578942 0.240801293674252 0.185708384109374 "ENSG00000162849" 1
GO:0060736 "GO:0060736" "prostate gland growth" "1/160" "11/20505" 0.0825805105578942 0.240801293674252 0.185708384109374 "ENSG00000164690" 1
GO:0060768 "GO:0060768" "regulation of epithelial cell proliferation involved in prostate gland development" "1/160" "11/20505" 0.0825805105578942 0.240801293674252 0.185708384109374 "ENSG00000164690" 1
GO:0060947 "GO:0060947" "cardiac vascular smooth muscle cell differentiation" "1/160" "11/20505" 0.0825805105578942 0.240801293674252 0.185708384109374 "ENSG00000141448" 1
GO:0061307 "GO:0061307" "cardiac neural crest cell differentiation involved in heart development" "1/160" "11/20505" 0.0825805105578942 0.240801293674252 0.185708384109374 "ENSG00000164093" 1
GO:0061308 "GO:0061308" "cardiac neural crest cell development involved in heart development" "1/160" "11/20505" 0.0825805105578942 0.240801293674252 0.185708384109374 "ENSG00000164093" 1
GO:0061469 "GO:0061469" "regulation of type B pancreatic cell proliferation" "1/160" "11/20505" 0.0825805105578942 0.240801293674252 0.185708384109374 "ENSG00000154342" 1
GO:0070189 "GO:0070189" "kynurenine metabolic process" "1/160" "11/20505" 0.0825805105578942 0.240801293674252 0.185708384109374 "ENSG00000131203" 1
GO:0071107 "GO:0071107" "response to parathyroid hormone" "1/160" "11/20505" 0.0825805105578942 0.240801293674252 0.185708384109374 "ENSG00000125931" 1
GO:0072672 "GO:0072672" "neutrophil extravasation" "1/160" "11/20505" 0.0825805105578942 0.240801293674252 0.185708384109374 "ENSG00000204936" 1
GO:1904181 "GO:1904181" "positive regulation of membrane depolarization" "1/160" "11/20505" 0.0825805105578942 0.240801293674252 0.185708384109374 "ENSG00000128052" 1
GO:2000503 "GO:2000503" "positive regulation of natural killer cell chemotaxis" "1/160" "11/20505" 0.0825805105578942 0.240801293674252 0.185708384109374 "ENSG00000145824" 1
GO:2001241 "GO:2001241" "positive regulation of extrinsic apoptotic signaling pathway in absence of ligand" "1/160" "11/20505" 0.0825805105578942 0.240801293674252 0.185708384109374 "ENSG00000165731" 1
GO:0070085 "GO:0070085" "glycosylation" "5/160" "296/20505" 0.0826545295210083 0.240801293674252 0.185708384109374 "ENSG00000182050/ENSG00000156966/ENSG00000100060/ENSG00000176928/ENSG00000148488" 5
GO:0032355 "GO:0032355" "response to estradiol" "3/160" "131/20505" 0.0831123946087652 0.241894282816555 0.186551308349394 "ENSG00000139874/ENSG00000181195/ENSG00000128918" 3
GO:0007163 "GO:0007163" "establishment or maintenance of cell polarity" "4/160" "211/20505" 0.08357165019544 0.242989141969843 0.187395674760728 "ENSG00000164690/ENSG00000103241/ENSG00000162849/ENSG00000114251" 4
GO:0018149 "GO:0018149" "peptide cross-linking" "2/160" "62/20505" 0.0844831867093945 0.243982792255731 0.188161987873695 "ENSG00000124491/ENSG00000107742" 2
GO:0032371 "GO:0032371" "regulation of sterol transport" "2/160" "62/20505" 0.0844831867093945 0.243982792255731 0.188161987873695 "ENSG00000164690/ENSG00000160179" 2
GO:0032374 "GO:0032374" "regulation of cholesterol transport" "2/160" "62/20505" 0.0844831867093945 0.243982792255731 0.188161987873695 "ENSG00000164690/ENSG00000160179" 2
GO:0043388 "GO:0043388" "positive regulation of DNA binding" "2/160" "62/20505" 0.0844831867093945 0.243982792255731 0.188161987873695 "ENSG00000054598/ENSG00000154342" 2
GO:0045747 "GO:0045747" "positive regulation of Notch signaling pathway" "2/160" "62/20505" 0.0844831867093945 0.243982792255731 0.188161987873695 "ENSG00000100060/ENSG00000198719" 2
GO:0051057 "GO:0051057" "positive regulation of small GTPase mediated signal transduction" "2/160" "62/20505" 0.0844831867093945 0.243982792255731 0.188161987873695 "ENSG00000157680/ENSG00000139679" 2
GO:0045471 "GO:0045471" "response to ethanol" "3/160" "132/20505" 0.0845807013153199 0.243982792255731 0.188161987873695 "ENSG00000165215/ENSG00000181195/ENSG00000183454" 3
GO:0051153 "GO:0051153" "regulation of striated muscle cell differentiation" "3/160" "132/20505" 0.0845807013153199 0.243982792255731 0.188161987873695 "ENSG00000164690/ENSG00000198719/ENSG00000154342" 3
GO:0042129 "GO:0042129" "regulation of T cell proliferation" "4/160" "213/20505" 0.085811300127253 0.245784776024075 0.189551695913484 "ENSG00000164690/ENSG00000131203/ENSG00000110944/ENSG00000160712" 4
GO:0006879 "GO:0006879" "cellular iron ion homeostasis" "2/160" "63/20505" 0.0868218410178316 0.245784776024075 0.189551695913484 "ENSG00000118777/ENSG00000168079" 2
GO:0046637 "GO:0046637" "regulation of alpha-beta T cell differentiation" "2/160" "63/20505" 0.0868218410178316 0.245784776024075 0.189551695913484 "ENSG00000164690/ENSG00000110944" 2
GO:0070228 "GO:0070228" "regulation of lymphocyte apoptotic process" "2/160" "63/20505" 0.0868218410178316 0.245784776024075 0.189551695913484 "ENSG00000131203/ENSG00000114251" 2
GO:0070527 "GO:0070527" "platelet aggregation" "2/160" "63/20505" 0.0868218410178316 0.245784776024075 0.189551695913484 "ENSG00000154342/ENSG00000134853" 2
GO:0002685 "GO:0002685" "regulation of leukocyte migration" "4/160" "214/20505" 0.0869420733864854 0.245784776024075 0.189551695913484 "ENSG00000110944/ENSG00000160712/ENSG00000145824/ENSG00000114251" 4
GO:0017157 "GO:0017157" "regulation of exocytosis" "4/160" "214/20505" 0.0869420733864854 0.245784776024075 0.189551695913484 "ENSG00000204936/ENSG00000157680/ENSG00000102362/ENSG00000103241" 4
GO:0045926 "GO:0045926" "negative regulation of growth" "5/160" "301/20505" 0.0872768405553449 0.245784776024075 0.189551695913484 "ENSG00000164736/ENSG00000158825/ENSG00000165140/ENSG00000154342/ENSG00000114251" 5
GO:0046425 "GO:0046425" "regulation of JAK-STAT cascade" "3/160" "134/20505" 0.0875505258961598 0.245784776024075 0.189551695913484 "ENSG00000110944/ENSG00000160712/ENSG00000165731" 3
GO:0052548 "GO:0052548" "regulation of endopeptidase activity" "7/160" "487/20505" 0.0876110279949272 0.245784776024075 0.189551695913484 "ENSG00000240065/ENSG00000156574/ENSG00000142405/ENSG00000107742/ENSG00000170369/ENSG00000154342/ENSG00000183454" 7
GO:0010001 "GO:0010001" "glial cell differentiation" "4/160" "215/20505" 0.0880801068453868 0.245784776024075 0.189551695913484 "ENSG00000164690/ENSG00000121966/ENSG00000100678/ENSG00000198719" 4
GO:0045017 "GO:0045017" "glycerolipid biosynthetic process" "5/160" "303/20505" 0.0891631133760778 0.245784776024075 0.189551695913484 "ENSG00000281028/ENSG00000186895/ENSG00000107831/ENSG00000158815/ENSG00000102678" 5
GO:0050706 "GO:0050706" "regulation of interleukin-1 beta secretion" "2/160" "64/20505" 0.0891798481185804 0.245784776024075 0.189551695913484 "ENSG00000142405/ENSG00000114251" 2
GO:0070830 "GO:0070830" "bicellular tight junction assembly" "2/160" "64/20505" 0.0891798481185804 0.245784776024075 0.189551695913484 "ENSG00000165215/ENSG00000019549" 2
GO:0000022 "GO:0000022" "mitotic spindle elongation" "1/160" "12/20505" 0.0897429541175083 0.245784776024075 0.189551695913484 "ENSG00000105146" 1
GO:0002887 "GO:0002887" "negative regulation of myeloid leukocyte mediated immunity" "1/160" "12/20505" 0.0897429541175083 0.245784776024075 0.189551695913484 "ENSG00000103241" 1
GO:0006105 "GO:0006105" "succinate metabolic process" "1/160" "12/20505" 0.0897429541175083 0.245784776024075 0.189551695913484 "ENSG00000126561" 1
GO:0008655 "GO:0008655" "pyrimidine-containing compound salvage" "1/160" "12/20505" 0.0897429541175083 0.245784776024075 0.189551695913484 "ENSG00000158825" 1
GO:0009757 "GO:0009757" "hexose mediated signaling" "1/160" "12/20505" 0.0897429541175083 0.245784776024075 0.189551695913484 "ENSG00000009950" 1
GO:0010182 "GO:0010182" "sugar mediated signaling pathway" "1/160" "12/20505" 0.0897429541175083 0.245784776024075 0.189551695913484 "ENSG00000009950" 1
GO:0010255 "GO:0010255" "glucose mediated signaling pathway" "1/160" "12/20505" 0.0897429541175083 0.245784776024075 0.189551695913484 "ENSG00000009950" 1
GO:0010649 "GO:0010649" "regulation of cell communication by electrical coupling" "1/160" "12/20505" 0.0897429541175083 0.245784776024075 0.189551695913484 "ENSG00000183023" 1
GO:0010935 "GO:0010935" "regulation of macrophage cytokine production" "1/160" "12/20505" 0.0897429541175083 0.245784776024075 0.189551695913484 "ENSG00000114251" 1
GO:0015697 "GO:0015697" "quaternary ammonium group transport" "1/160" "12/20505" 0.0897429541175083 0.245784776024075 0.189551695913484 "ENSG00000145832" 1
GO:0016322 "GO:0016322" "neuron remodeling" "1/160" "12/20505" 0.0897429541175083 0.245784776024075 0.189551695913484 "ENSG00000074660" 1
GO:0033004 "GO:0033004" "negative regulation of mast cell activation" "1/160" "12/20505" 0.0897429541175083 0.245784776024075 0.189551695913484 "ENSG00000103241" 1
GO:0033700 "GO:0033700" "phospholipid efflux" "1/160" "12/20505" 0.0897429541175083 0.245784776024075 0.189551695913484 "ENSG00000160179" 1
GO:0038110 "GO:0038110" "interleukin-2-mediated signaling pathway" "1/160" "12/20505" 0.0897429541175083 0.245784776024075 0.189551695913484 "ENSG00000126561" 1
GO:0043116 "GO:0043116" "negative regulation of vascular permeability" "1/160" "12/20505" 0.0897429541175083 0.245784776024075 0.189551695913484 "ENSG00000148926" 1
GO:0043455 "GO:0043455" "regulation of secondary metabolic process" "1/160" "12/20505" 0.0897429541175083 0.245784776024075 0.189551695913484 "ENSG00000114251" 1
GO:0045060 "GO:0045060" "negative thymic T cell selection" "1/160" "12/20505" 0.0897429541175083 0.245784776024075 0.189551695913484 "ENSG00000164690" 1
GO:0045793 "GO:0045793" "positive regulation of cell size" "1/160" "12/20505" 0.0897429541175083 0.245784776024075 0.189551695913484 "ENSG00000165731" 1
GO:0045820 "GO:0045820" "negative regulation of glycolytic process" "1/160" "12/20505" 0.0897429541175083 0.245784776024075 0.189551695913484 "ENSG00000165140" 1
GO:0046520 "GO:0046520" "sphingoid biosynthetic process" "1/160" "12/20505" 0.0897429541175083 0.245784776024075 0.189551695913484 "ENSG00000172296" 1
GO:0048484 "GO:0048484" "enteric nervous system development" "1/160" "12/20505" 0.0897429541175083 0.245784776024075 0.189551695913484 "ENSG00000165731" 1
GO:0048672 "GO:0048672" "positive regulation of collateral sprouting" "1/160" "12/20505" 0.0897429541175083 0.245784776024075 0.189551695913484 "ENSG00000154342" 1
GO:0060391 "GO:0060391" "positive regulation of SMAD protein signal transduction" "1/160" "12/20505" 0.0897429541175083 0.245784776024075 0.189551695913484 "ENSG00000156574" 1
GO:0060439 "GO:0060439" "trachea morphogenesis" "1/160" "12/20505" 0.0897429541175083 0.245784776024075 0.189551695913484 "ENSG00000164690" 1
GO:0060442 "GO:0060442" "branching involved in prostate gland morphogenesis" "1/160" "12/20505" 0.0897429541175083 0.245784776024075 0.189551695913484 "ENSG00000164690" 1
GO:0060664 "GO:0060664" "epithelial cell proliferation involved in salivary gland morphogenesis" "1/160" "12/20505" 0.0897429541175083 0.245784776024075 0.189551695913484 "ENSG00000164690" 1
GO:0060767 "GO:0060767" "epithelial cell proliferation involved in prostate gland development" "1/160" "12/20505" 0.0897429541175083 0.245784776024075 0.189551695913484 "ENSG00000164690" 1
GO:0060788 "GO:0060788" "ectodermal placode formation" "1/160" "12/20505" 0.0897429541175083 0.245784776024075 0.189551695913484 "ENSG00000104371" 1
GO:0060837 "GO:0060837" "blood vessel endothelial cell differentiation" "1/160" "12/20505" 0.0897429541175083 0.245784776024075 0.189551695913484 "ENSG00000198719" 1
GO:0061450 "GO:0061450" "trophoblast cell migration" "1/160" "12/20505" 0.0897429541175083 0.245784776024075 0.189551695913484 "ENSG00000156574" 1
GO:0071415 "GO:0071415" "cellular response to purine-containing compound" "1/160" "12/20505" 0.0897429541175083 0.245784776024075 0.189551695913484 "ENSG00000183023" 1
GO:0071697 "GO:0071697" "ectodermal placode morphogenesis" "1/160" "12/20505" 0.0897429541175083 0.245784776024075 0.189551695913484 "ENSG00000104371" 1
GO:0072177 "GO:0072177" "mesonephric duct development" "1/160" "12/20505" 0.0897429541175083 0.245784776024075 0.189551695913484 "ENSG00000273706" 1
GO:0072540 "GO:0072540" "T-helper 17 cell lineage commitment" "1/160" "12/20505" 0.0897429541175083 0.245784776024075 0.189551695913484 "ENSG00000110944" 1
GO:1901163 "GO:1901163" "regulation of trophoblast cell migration" "1/160" "12/20505" 0.0897429541175083 0.245784776024075 0.189551695913484 "ENSG00000156574" 1
GO:1901660 "GO:1901660" "calcium ion export" "1/160" "12/20505" 0.0897429541175083 0.245784776024075 0.189551695913484 "ENSG00000100678" 1
GO:1902093 "GO:1902093" "positive regulation of flagellated sperm motility" "1/160" "12/20505" 0.0897429541175083 0.245784776024075 0.189551695913484 "ENSG00000147596" 1
GO:1902287 "GO:1902287" "semaphorin-plexin signaling pathway involved in axon guidance" "1/160" "12/20505" 0.0897429541175083 0.245784776024075 0.189551695913484 "ENSG00000076356" 1
GO:1902337 "GO:1902337" "regulation of apoptotic process involved in morphogenesis" "1/160" "12/20505" 0.0897429541175083 0.245784776024075 0.189551695913484 "ENSG00000054598" 1
GO:1902430 "GO:1902430" "negative regulation of amyloid-beta formation" "1/160" "12/20505" 0.0897429541175083 0.245784776024075 0.189551695913484 "ENSG00000262655" 1
GO:0010952 "GO:0010952" "positive regulation of peptidase activity" "4/160" "217/20505" 0.090377835682454 0.247292019991747 0.190714097649056 "ENSG00000156574/ENSG00000142405/ENSG00000154342/ENSG00000183454" 4
GO:0007043 "GO:0007043" "cell-cell junction assembly" "3/160" "136/20505" 0.0905640352675891 0.247338751781231 0.190750137675997 "ENSG00000165215/ENSG00000019549/ENSG00000140937" 3
GO:0030101 "GO:0030101" "natural killer cell activation" "3/160" "136/20505" 0.0905640352675891 0.247338751781231 0.190750137675997 "ENSG00000110944/ENSG00000198846/ENSG00000160712" 3
GO:0006694 "GO:0006694" "steroid biosynthetic process" "4/160" "218/20505" 0.0915374706221491 0.249583920854299 0.192481634688534 "ENSG00000148926/ENSG00000160179/ENSG00000169297/ENSG00000019549" 4
GO:0120192 "GO:0120192" "tight junction assembly" "2/160" "65/20505" 0.0915567682313378 0.249583920854299 0.192481634688534 "ENSG00000165215/ENSG00000019549" 2
GO:0060048 "GO:0060048" "cardiac muscle contraction" "3/160" "137/20505" 0.0920869457437768 0.25025242165594 0.19299718924289 "ENSG00000120457/ENSG00000183023/ENSG00000162989" 3
GO:0001508 "GO:0001508" "action potential" "3/160" "138/20505" 0.0936205050953701 0.25025242165594 0.19299718924289 "ENSG00000120457/ENSG00000183023/ENSG00000162989" 3
GO:1904892 "GO:1904892" "regulation of STAT cascade" "3/160" "138/20505" 0.0936205050953701 0.25025242165594 0.19299718924289 "ENSG00000110944/ENSG00000160712/ENSG00000165731" 3
GO:0045600 "GO:0045600" "positive regulation of fat cell differentiation" "2/160" "66/20505" 0.0939521671827288 0.25025242165594 0.19299718924289 "ENSG00000184344/ENSG00000019549" 2
GO:1905953 "GO:1905953" "negative regulation of lipid localization" "2/160" "66/20505" 0.0939521671827288 0.25025242165594 0.19299718924289 "ENSG00000164690/ENSG00000160179" 2
GO:0042063 "GO:0042063" "gliogenesis" "5/160" "308/20505" 0.0939713010786636 0.25025242165594 0.19299718924289 "ENSG00000164690/ENSG00000121966/ENSG00000181195/ENSG00000100678/ENSG00000198719" 5
GO:0002576 "GO:0002576" "platelet degranulation" "3/160" "139/20505" 0.0951646214284544 0.25025242165594 0.19299718924289 "ENSG00000143768/ENSG00000124491/ENSG00000102362" 3
GO:0032675 "GO:0032675" "regulation of interleukin-6 production" "3/160" "139/20505" 0.0951646214284544 0.25025242165594 0.19299718924289 "ENSG00000142405/ENSG00000160712/ENSG00000114251" 3
GO:0002292 "GO:0002292" "T cell differentiation involved in immune response" "2/160" "67/20505" 0.0963656163464984 0.25025242165594 0.19299718924289 "ENSG00000163508/ENSG00000110944" 2
GO:0030858 "GO:0030858" "positive regulation of epithelial cell differentiation" "2/160" "67/20505" 0.0963656163464984 0.25025242165594 0.19299718924289 "ENSG00000273706/ENSG00000054598" 2
GO:0060071 "GO:0060071" "Wnt signaling pathway, planar cell polarity pathway" "2/160" "67/20505" 0.0963656163464984 0.25025242165594 0.19299718924289 "ENSG00000146374/ENSG00000114251" 2
GO:1903036 "GO:1903036" "positive regulation of response to wounding" "2/160" "67/20505" 0.0963656163464984 0.25025242165594 0.19299718924289 "ENSG00000074660/ENSG00000176692" 2
GO:0050880 "GO:0050880" "regulation of blood vessel size" "3/160" "140/20505" 0.0967192023528545 0.25025242165594 0.19299718924289 "ENSG00000148926/ENSG00000054598/ENSG00000183023" 3
GO:0003157 "GO:0003157" "endocardium development" "1/160" "13/20505" 0.0968498260904357 0.25025242165594 0.19299718924289 "ENSG00000164736" 1
GO:0005984 "GO:0005984" "disaccharide metabolic process" "1/160" "13/20505" 0.0968498260904357 0.25025242165594 0.19299718924289 "ENSG00000165140" 1
GO:0006171 "GO:0006171" "cAMP biosynthetic process" "1/160" "13/20505" 0.0968498260904357 0.25025242165594 0.19299718924289 "ENSG00000148926" 1
GO:0006216 "GO:0006216" "cytidine catabolic process" "1/160" "13/20505" 0.0968498260904357 0.25025242165594 0.19299718924289 "ENSG00000158825" 1
GO:0006568 "GO:0006568" "tryptophan metabolic process" "1/160" "13/20505" 0.0968498260904357 0.25025242165594 0.19299718924289 "ENSG00000131203" 1
GO:0006707 "GO:0006707" "cholesterol catabolic process" "1/160" "13/20505" 0.0968498260904357 0.25025242165594 0.19299718924289 "ENSG00000074660" 1
GO:0007183 "GO:0007183" "SMAD protein complex assembly" "1/160" "13/20505" 0.0968498260904357 0.25025242165594 0.19299718924289 "ENSG00000168675" 1
GO:0009972 "GO:0009972" "cytidine deamination" "1/160" "13/20505" 0.0968498260904357 0.25025242165594 0.19299718924289 "ENSG00000158825" 1
GO:0010745 "GO:0010745" "negative regulation of macrophage derived foam cell differentiation" "1/160" "13/20505" 0.0968498260904357 0.25025242165594 0.19299718924289 "ENSG00000160179" 1
GO:0014029 "GO:0014029" "neural crest formation" "1/160" "13/20505" 0.0968498260904357 0.25025242165594 0.19299718924289 "ENSG00000133937" 1
GO:0014819 "GO:0014819" "regulation of skeletal muscle contraction" "1/160" "13/20505" 0.0968498260904357 0.25025242165594 0.19299718924289 "ENSG00000100678" 1
GO:0016127 "GO:0016127" "sterol catabolic process" "1/160" "13/20505" 0.0968498260904357 0.25025242165594 0.19299718924289 "ENSG00000074660" 1
GO:0016554 "GO:0016554" "cytidine to uridine editing" "1/160" "13/20505" 0.0968498260904357 0.25025242165594 0.19299718924289 "ENSG00000163694" 1
GO:0030213 "GO:0030213" "hyaluronan biosynthetic process" "1/160" "13/20505" 0.0968498260904357 0.25025242165594 0.19299718924289 "ENSG00000103888" 1
GO:0030812 "GO:0030812" "negative regulation of nucleotide catabolic process" "1/160" "13/20505" 0.0968498260904357 0.25025242165594 0.19299718924289 "ENSG00000165140" 1
GO:0031953 "GO:0031953" "negative regulation of protein autophosphorylation" "1/160" "13/20505" 0.0968498260904357 0.25025242165594 0.19299718924289 "ENSG00000142405" 1
GO:0032725 "GO:0032725" "positive regulation of granulocyte macrophage colony-stimulating factor production" "1/160" "13/20505" 0.0968498260904357 0.25025242165594 0.19299718924289 "ENSG00000110944" 1
GO:0034969 "GO:0034969" "histone arginine methylation" "1/160" "13/20505" 0.0968498260904357 0.25025242165594 0.19299718924289 "ENSG00000147596" 1
GO:0035641 "GO:0035641" "locomotory exploration behavior" "1/160" "13/20505" 0.0968498260904357 0.25025242165594 0.19299718924289 "ENSG00000181195" 1
GO:0035723 "GO:0035723" "interleukin-15-mediated signaling pathway" "1/160" "13/20505" 0.0968498260904357 0.25025242165594 0.19299718924289 "ENSG00000126561" 1
GO:0042908 "GO:0042908" "xenobiotic transport" "1/160" "13/20505" 0.0968498260904357 0.25025242165594 0.19299718924289 "ENSG00000118777" 1
GO:0043301 "GO:0043301" "negative regulation of leukocyte degranulation" "1/160" "13/20505" 0.0968498260904357 0.25025242165594 0.19299718924289 "ENSG00000103241" 1
GO:0045217 "GO:0045217" "cell-cell junction maintenance" "1/160" "13/20505" 0.0968498260904357 0.25025242165594 0.19299718924289 "ENSG00000204936" 1
GO:0046087 "GO:0046087" "cytidine metabolic process" "1/160" "13/20505" 0.0968498260904357 0.25025242165594 0.19299718924289 "ENSG00000158825" 1
GO:0046415 "GO:0046415" "urate metabolic process" "1/160" "13/20505" 0.0968498260904357 0.25025242165594 0.19299718924289 "ENSG00000118777" 1
GO:0050872 "GO:0050872" "white fat cell differentiation" "1/160" "13/20505" 0.0968498260904357 0.25025242165594 0.19299718924289 "ENSG00000019549" 1
GO:0051198 "GO:0051198" "negative regulation of coenzyme metabolic process" "1/160" "13/20505" 0.0968498260904357 0.25025242165594 0.19299718924289 "ENSG00000165140" 1
GO:0051231 "GO:0051231" "spindle elongation" "1/160" "13/20505" 0.0968498260904357 0.25025242165594 0.19299718924289 "ENSG00000105146" 1
GO:0051255 "GO:0051255" "spindle midzone assembly" "1/160" "13/20505" 0.0968498260904357 0.25025242165594 0.19299718924289 "ENSG00000105146" 1
GO:0060340 "GO:0060340" "positive regulation of type I interferon-mediated signaling pathway" "1/160" "13/20505" 0.0968498260904357 0.25025242165594 0.19299718924289 "ENSG00000114251" 1
GO:0060397 "GO:0060397" "JAK-STAT cascade involved in growth hormone signaling pathway" "1/160" "13/20505" 0.0968498260904357 0.25025242165594 0.19299718924289 "ENSG00000126561" 1
GO:0070243 "GO:0070243" "regulation of thymocyte apoptotic process" "1/160" "13/20505" 0.0968498260904357 0.25025242165594 0.19299718924289 "ENSG00000114251" 1
GO:0071350 "GO:0071350" "cellular response to interleukin-15" "1/160" "13/20505" 0.0968498260904357 0.25025242165594 0.19299718924289 "ENSG00000126561" 1
GO:0071352 "GO:0071352" "cellular response to interleukin-2" "1/160" "13/20505" 0.0968498260904357 0.25025242165594 0.19299718924289 "ENSG00000126561" 1
GO:0071696 "GO:0071696" "ectodermal placode development" "1/160" "13/20505" 0.0968498260904357 0.25025242165594 0.19299718924289 "ENSG00000104371" 1
GO:0072070 "GO:0072070" "loop of Henle development" "1/160" "13/20505" 0.0968498260904357 0.25025242165594 0.19299718924289 "ENSG00000198719" 1
GO:0090179 "GO:0090179" "planar cell polarity pathway involved in neural tube closure" "1/160" "13/20505" 0.0968498260904357 0.25025242165594 0.19299718924289 "ENSG00000114251" 1
GO:0090192 "GO:0090192" "regulation of glomerulus development" "1/160" "13/20505" 0.0968498260904357 0.25025242165594 0.19299718924289 "ENSG00000165731" 1
GO:1901160 "GO:1901160" "primary amino compound metabolic process" "1/160" "13/20505" 0.0968498260904357 0.25025242165594 0.19299718924289 "ENSG00000183454" 1
GO:1901678 "GO:1901678" "iron coordination entity transport" "1/160" "13/20505" 0.0968498260904357 0.25025242165594 0.19299718924289 "ENSG00000118777" 1
GO:1902285 "GO:1902285" "semaphorin-plexin signaling pathway involved in neuron projection guidance" "1/160" "13/20505" 0.0968498260904357 0.25025242165594 0.19299718924289 "ENSG00000076356" 1
GO:1902563 "GO:1902563" "regulation of neutrophil activation" "1/160" "13/20505" 0.0968498260904357 0.25025242165594 0.19299718924289 "ENSG00000204936" 1
GO:2000318 "GO:2000318" "positive regulation of T-helper 17 type immune response" "1/160" "13/20505" 0.0968498260904357 0.25025242165594 0.19299718924289 "ENSG00000110944" 1
GO:2000345 "GO:2000345" "regulation of hepatocyte proliferation" "1/160" "13/20505" 0.0968498260904357 0.25025242165594 0.19299718924289 "ENSG00000154342" 1
GO:2000501 "GO:2000501" "regulation of natural killer cell chemotaxis" "1/160" "13/20505" 0.0968498260904357 0.25025242165594 0.19299718924289 "ENSG00000145824" 1
GO:2001044 "GO:2001044" "regulation of integrin-mediated signaling pathway" "1/160" "13/20505" 0.0968498260904357 0.25025242165594 0.19299718924289 "ENSG00000204936" 1
GO:0001818 "GO:0001818" "negative regulation of cytokine production" "5/160" "312/20505" 0.0979121147710194 0.252773994444159 0.194941851585725 "ENSG00000141448/ENSG00000131203/ENSG00000110944/ENSG00000142405/ENSG00000198719" 5
GO:0051098 "GO:0051098" "regulation of binding" "6/160" "405/20505" 0.098064753734326 0.252944801298857 0.195073579553198 "ENSG00000100060/ENSG00000102096/ENSG00000054598/ENSG00000154342/ENSG00000114251/ENSG00000262655" 6
GO:0071804 "GO:0071804" "cellular potassium ion transport" "4/160" "224/20505" 0.0986440968075654 0.25326004019483 0.195316694966269 "ENSG00000124780/ENSG00000120457/ENSG00000185760/ENSG00000162989" 4
GO:0071805 "GO:0071805" "potassium ion transmembrane transport" "4/160" "224/20505" 0.0986440968075654 0.25326004019483 0.195316694966269 "ENSG00000124780/ENSG00000120457/ENSG00000185760/ENSG00000162989" 4
GO:0016239 "GO:0016239" "positive regulation of macroautophagy" "2/160" "68/20505" 0.0987966925842874 0.25326004019483 0.195316694966269 "ENSG00000128052/ENSG00000102096" 2
GO:0032722 "GO:0032722" "positive regulation of chemokine production" "2/160" "68/20505" 0.0987966925842874 0.25326004019483 0.195316694966269 "ENSG00000160712/ENSG00000114251" 2
GO:0032732 "GO:0032732" "positive regulation of interleukin-1 production" "2/160" "68/20505" 0.0987966925842874 0.25326004019483 0.195316694966269 "ENSG00000142405/ENSG00000114251" 2
GO:0120193 "GO:0120193" "tight junction organization" "2/160" "68/20505" 0.0987966925842874 0.25326004019483 0.195316694966269 "ENSG00000165215/ENSG00000019549" 2
GO:0051091 "GO:0051091" "positive regulation of DNA-binding transcription factor activity" "5/160" "313/20505" 0.0989102922168087 0.25326004019483 0.195316694966269 "ENSG00000156574/ENSG00000164690/ENSG00000154342/ENSG00000114251/ENSG00000162733" 5
GO:0006650 "GO:0006650" "glycerophospholipid metabolic process" "6/160" "407/20505" 0.0997990069159405 0.25326004019483 0.195316694966269 "ENSG00000281028/ENSG00000186895/ENSG00000107831/ENSG00000158815/ENSG00000102678/ENSG00000134853" 6
GO:0051271 "GO:0051271" "negative regulation of cellular component movement" "6/160" "407/20505" 0.0997990069159405 0.25326004019483 0.195316694966269 "ENSG00000156574/ENSG00000164690/ENSG00000146904/ENSG00000154342/ENSG00000114251/ENSG00000168675" 6
GO:0035150 "GO:0035150" "regulation of tube size" "3/160" "142/20505" 0.0998593860700343 0.25326004019483 0.195316694966269 "ENSG00000148926/ENSG00000054598/ENSG00000183023" 3
GO:0043666 "GO:0043666" "regulation of phosphoprotein phosphatase activity" "3/160" "142/20505" 0.0998593860700343 0.25326004019483 0.195316694966269 "ENSG00000101445/ENSG00000156475/ENSG00000198729" 3
GO:0010810 "GO:0010810" "regulation of cell-substrate adhesion" "4/160" "226/20505" 0.101068886442492 0.25326004019483 0.195316694966269 "ENSG00000128052/ENSG00000146904/ENSG00000107742/ENSG00000103241" 4
GO:0050866 "GO:0050866" "negative regulation of cell activation" "4/160" "226/20505" 0.101068886442492 0.25326004019483 0.195316694966269 "ENSG00000164690/ENSG00000131203/ENSG00000103241/ENSG00000134853" 4
GO:0046513 "GO:0046513" "ceramide biosynthetic process" "2/160" "69/20505" 0.101244978186985 0.25326004019483 0.195316694966269 "ENSG00000179148/ENSG00000148488" 2
GO:0090175 "GO:0090175" "regulation of establishment of planar polarity" "2/160" "69/20505" 0.101244978186985 0.25326004019483 0.195316694966269 "ENSG00000146374/ENSG00000114251" 2
GO:2000243 "GO:2000243" "positive regulation of reproductive process" "2/160" "69/20505" 0.101244978186985 0.25326004019483 0.195316694966269 "ENSG00000164690/ENSG00000114251" 2
GO:0042102 "GO:0042102" "positive regulation of T cell proliferation" "3/160" "143/20505" 0.10144480180445 0.25326004019483 0.195316694966269 "ENSG00000164690/ENSG00000110944/ENSG00000160712" 3
GO:0034330 "GO:0034330" "cell junction organization" "5/160" "317/20505" 0.102954446761581 0.25326004019483 0.195316694966269 "ENSG00000204936/ENSG00000128052/ENSG00000165215/ENSG00000019549/ENSG00000140937" 5
GO:0002064 "GO:0002064" "epithelial cell development" "4/160" "228/20505" 0.103521186706185 0.25326004019483 0.195316694966269 "ENSG00000101445/ENSG00000165215/ENSG00000198719/ENSG00000114251" 4
GO:0019748 "GO:0019748" "secondary metabolic process" "2/160" "70/20505" 0.103710060816654 0.25326004019483 0.195316694966269 "ENSG00000125931/ENSG00000114251" 2
GO:0031670 "GO:0031670" "cellular response to nutrient" "2/160" "70/20505" 0.103710060816654 0.25326004019483 0.195316694966269 "ENSG00000181195/ENSG00000019549" 2
GO:0045685 "GO:0045685" "regulation of glial cell differentiation" "2/160" "70/20505" 0.103710060816654 0.25326004019483 0.195316694966269 "ENSG00000164690/ENSG00000121966" 2
GO:0048663 "GO:0048663" "neuron fate commitment" "2/160" "70/20505" 0.103710060816654 0.25326004019483 0.195316694966269 "ENSG00000164690/ENSG00000198719" 2
GO:0050702 "GO:0050702" "interleukin-1 beta secretion" "2/160" "70/20505" 0.103710060816654 0.25326004019483 0.195316694966269 "ENSG00000142405/ENSG00000114251" 2
GO:0055008 "GO:0055008" "cardiac muscle tissue morphogenesis" "2/160" "70/20505" 0.103710060816654 0.25326004019483 0.195316694966269 "ENSG00000054598/ENSG00000114251" 2
GO:0086003 "GO:0086003" "cardiac muscle cell contraction" "2/160" "70/20505" 0.103710060816654 0.25326004019483 0.195316694966269 "ENSG00000120457/ENSG00000162989" 2
GO:1904427 "GO:1904427" "positive regulation of calcium ion transmembrane transport" "2/160" "70/20505" 0.103710060816654 0.25326004019483 0.195316694966269 "ENSG00000103888/ENSG00000134817" 2
GO:0001574 "GO:0001574" "ganglioside biosynthetic process" "1/160" "14/20505" 0.103901554951725 0.25326004019483 0.195316694966269 "ENSG00000148488" 1
GO:0003128 "GO:0003128" "heart field specification" "1/160" "14/20505" 0.103901554951725 0.25326004019483 0.195316694966269 "ENSG00000154342" 1
GO:0003214 "GO:0003214" "cardiac left ventricle morphogenesis" "1/160" "14/20505" 0.103901554951725 0.25326004019483 0.195316694966269 "ENSG00000103241" 1
GO:0007512 "GO:0007512" "adult heart development" "1/160" "14/20505" 0.103901554951725 0.25326004019483 0.195316694966269 "ENSG00000134817" 1
GO:0009756 "GO:0009756" "carbohydrate mediated signaling" "1/160" "14/20505" 0.103901554951725 0.25326004019483 0.195316694966269 "ENSG00000009950" 1
GO:0010839 "GO:0010839" "negative regulation of keratinocyte proliferation" "1/160" "14/20505" 0.103901554951725 0.25326004019483 0.195316694966269 "ENSG00000019549" 1
GO:0010934 "GO:0010934" "macrophage cytokine production" "1/160" "14/20505" 0.103901554951725 0.25326004019483 0.195316694966269 "ENSG00000114251" 1
GO:0019336 "GO:0019336" "phenol-containing compound catabolic process" "1/160" "14/20505" 0.103901554951725 0.25326004019483 0.195316694966269 "ENSG00000197406" 1
GO:0021889 "GO:0021889" "olfactory bulb interneuron differentiation" "1/160" "14/20505" 0.103901554951725 0.25326004019483 0.195316694966269 "ENSG00000114251" 1
GO:0032105 "GO:0032105" "negative regulation of response to extracellular stimulus" "1/160" "14/20505" 0.103901554951725 0.25326004019483 0.195316694966269 "ENSG00000019549" 1
GO:0032108 "GO:0032108" "negative regulation of response to nutrient levels" "1/160" "14/20505" 0.103901554951725 0.25326004019483 0.195316694966269 "ENSG00000019549" 1
GO:0032823 "GO:0032823" "regulation of natural killer cell differentiation" "1/160" "14/20505" 0.103901554951725 0.25326004019483 0.195316694966269 "ENSG00000198846" 1
GO:0034374 "GO:0034374" "low-density lipoprotein particle remodeling" "1/160" "14/20505" 0.103901554951725 0.25326004019483 0.195316694966269 "ENSG00000160179" 1
GO:0034433 "GO:0034433" "steroid esterification" "1/160" "14/20505" 0.103901554951725 0.25326004019483 0.195316694966269 "ENSG00000160179" 1
GO:0034434 "GO:0034434" "sterol esterification" "1/160" "14/20505" 0.103901554951725 0.25326004019483 0.195316694966269 "ENSG00000160179" 1
GO:0034435 "GO:0034435" "cholesterol esterification" "1/160" "14/20505" 0.103901554951725 0.25326004019483 0.195316694966269 "ENSG00000160179" 1
GO:0036376 "GO:0036376" "sodium ion export across plasma membrane" "1/160" "14/20505" 0.103901554951725 0.25326004019483 0.195316694966269 "ENSG00000183023" 1
GO:0036445 "GO:0036445" "neuronal stem cell division" "1/160" "14/20505" 0.103901554951725 0.25326004019483 0.195316694966269 "ENSG00000154342" 1
GO:0043374 "GO:0043374" "CD8-positive, alpha-beta T cell differentiation" "1/160" "14/20505" 0.103901554951725 0.25326004019483 0.195316694966269 "ENSG00000163508" 1
GO:0043383 "GO:0043383" "negative T cell selection" "1/160" "14/20505" 0.103901554951725 0.25326004019483 0.195316694966269 "ENSG00000164690" 1
GO:0043584 "GO:0043584" "nose development" "1/160" "14/20505" 0.103901554951725 0.25326004019483 0.195316694966269 "ENSG00000184254" 1
GO:0045059 "GO:0045059" "positive thymic T cell selection" "1/160" "14/20505" 0.103901554951725 0.25326004019483 0.195316694966269 "ENSG00000164690" 1
GO:0045651 "GO:0045651" "positive regulation of macrophage differentiation" "1/160" "14/20505" 0.103901554951725 0.25326004019483 0.195316694966269 "ENSG00000157368" 1
GO:0051770 "GO:0051770" "positive regulation of nitric-oxide synthase biosynthetic process" "1/160" "14/20505" 0.103901554951725 0.25326004019483 0.195316694966269 "ENSG00000128052" 1
GO:0055057 "GO:0055057" "neuroblast division" "1/160" "14/20505" 0.103901554951725 0.25326004019483 0.195316694966269 "ENSG00000154342" 1
GO:0060394 "GO:0060394" "negative regulation of pathway-restricted SMAD protein phosphorylation" "1/160" "14/20505" 0.103901554951725 0.25326004019483 0.195316694966269 "ENSG00000168675" 1
GO:0061042 "GO:0061042" "vascular wound healing" "1/160" "14/20505" 0.103901554951725 0.25326004019483 0.195316694966269 "ENSG00000176692" 1
GO:0070672 "GO:0070672" "response to interleukin-15" "1/160" "14/20505" 0.103901554951725 0.25326004019483 0.195316694966269 "ENSG00000126561" 1
GO:0071285 "GO:0071285" "cellular response to lithium ion" "1/160" "14/20505" 0.103901554951725 0.25326004019483 0.195316694966269 "ENSG00000164690" 1
GO:0071599 "GO:0071599" "otic vesicle development" "1/160" "14/20505" 0.103901554951725 0.25326004019483 0.195316694966269 "ENSG00000107831" 1
GO:0072182 "GO:0072182" "regulation of nephron tubule epithelial cell differentiation" "1/160" "14/20505" 0.103901554951725 0.25326004019483 0.195316694966269 "ENSG00000273706" 1
GO:0072216 "GO:0072216" "positive regulation of metanephros development" "1/160" "14/20505" 0.103901554951725 0.25326004019483 0.195316694966269 "ENSG00000165731" 1
GO:0090036 "GO:0090036" "regulation of protein kinase C signaling" "1/160" "14/20505" 0.103901554951725 0.25326004019483 0.195316694966269 "ENSG00000114251" 1
GO:0090178 "GO:0090178" "regulation of establishment of planar polarity involved in neural tube closure" "1/160" "14/20505" 0.103901554951725 0.25326004019483 0.195316694966269 "ENSG00000114251" 1
GO:0090677 "GO:0090677" "reversible differentiation" "1/160" "14/20505" 0.103901554951725 0.25326004019483 0.195316694966269 "ENSG00000102678" 1
GO:1902992 "GO:1902992" "negative regulation of amyloid precursor protein catabolic process" "1/160" "14/20505" 0.103901554951725 0.25326004019483 0.195316694966269 "ENSG00000262655" 1
GO:1904748 "GO:1904748" "regulation of apoptotic process involved in development" "1/160" "14/20505" 0.103901554951725 0.25326004019483 0.195316694966269 "ENSG00000054598" 1
GO:1905064 "GO:1905064" "negative regulation of vascular smooth muscle cell differentiation" "1/160" "14/20505" 0.103901554951725 0.25326004019483 0.195316694966269 "ENSG00000102678" 1
GO:2000095 "GO:2000095" "regulation of Wnt signaling pathway, planar cell polarity pathway" "1/160" "14/20505" 0.103901554951725 0.25326004019483 0.195316694966269 "ENSG00000146374" 1
GO:0045834 "GO:0045834" "positive regulation of lipid metabolic process" "3/160" "145/20505" 0.104645810290877 0.254861777769206 0.196551971123494 "ENSG00000009950/ENSG00000160179/ENSG00000134853" 3
GO:0097529 "GO:0097529" "myeloid leukocyte migration" "4/160" "230/20505" 0.106000720684072 0.257767830156334 0.198793148007206 "ENSG00000204936/ENSG00000110944/ENSG00000160712/ENSG00000006606" 4
GO:0003407 "GO:0003407" "neural retina development" "2/160" "71/20505" 0.10619153344902 0.257767830156334 0.198793148007206 "ENSG00000273706/ENSG00000197406" 2
GO:0035418 "GO:0035418" "protein localization to synapse" "2/160" "71/20505" 0.10619153344902 0.257767830156334 0.198793148007206 "ENSG00000183454/ENSG00000114251" 2
GO:0061035 "GO:0061035" "regulation of cartilage development" "2/160" "71/20505" 0.10619153344902 0.257767830156334 0.198793148007206 "ENSG00000019549/ENSG00000114251" 2
GO:0006720 "GO:0006720" "isoprenoid metabolic process" "3/160" "147/20505" 0.107886422747408 0.259382764786225 0.200038601866624 "ENSG00000184254/ENSG00000121207/ENSG00000128918" 3
GO:0038061 "GO:0038061" "NIK/NF-kappaB signaling" "3/160" "147/20505" 0.107886422747408 0.259382764786225 0.200038601866624 "ENSG00000110944/ENSG00000142405/ENSG00000135960" 3
GO:0008654 "GO:0008654" "phospholipid biosynthetic process" "5/160" "322/20505" 0.108124199404773 0.259382764786225 0.200038601866624 "ENSG00000281028/ENSG00000186895/ENSG00000107831/ENSG00000158815/ENSG00000102678" 5
GO:1901214 "GO:1901214" "regulation of neuron death" "5/160" "322/20505" 0.108124199404773 0.259382764786225 0.200038601866624 "ENSG00000124493/ENSG00000125931/ENSG00000154342/ENSG00000107831/ENSG00000114251" 5
GO:0006643 "GO:0006643" "membrane lipid metabolic process" "4/160" "232/20505" 0.108507205733032 0.259382764786225 0.200038601866624 "ENSG00000172296/ENSG00000105855/ENSG00000179148/ENSG00000148488" 4
GO:0035914 "GO:0035914" "skeletal muscle cell differentiation" "2/160" "72/20505" 0.108688994316526 0.259382764786225 0.200038601866624 "ENSG00000163508/ENSG00000154342" 2
GO:0040014 "GO:0040014" "regulation of multicellular organism growth" "2/160" "72/20505" 0.108688994316526 0.259382764786225 0.200038601866624 "ENSG00000126561/ENSG00000197406" 2
GO:0050704 "GO:0050704" "regulation of interleukin-1 secretion" "2/160" "72/20505" 0.108688994316526 0.259382764786225 0.200038601866624 "ENSG00000142405/ENSG00000114251" 2
GO:0072678 "GO:0072678" "T cell migration" "2/160" "72/20505" 0.108688994316526 0.259382764786225 0.200038601866624 "ENSG00000114251/ENSG00000006606" 2
GO:1900371 "GO:1900371" "regulation of purine nucleotide biosynthetic process" "2/160" "72/20505" 0.108688994316526 0.259382764786225 0.200038601866624 "ENSG00000165140/ENSG00000009950" 2
GO:2000401 "GO:2000401" "regulation of lymphocyte migration" "2/160" "72/20505" 0.108688994316526 0.259382764786225 0.200038601866624 "ENSG00000145824/ENSG00000114251" 2
GO:0009913 "GO:0009913" "epidermal cell differentiation" "6/160" "417/20505" 0.108712997905413 0.259382764786225 0.200038601866624 "ENSG00000164093/ENSG00000184344/ENSG00000054598/ENSG00000198719/ENSG00000114251/ENSG00000170484" 6
GO:2000241 "GO:2000241" "regulation of reproductive process" "3/160" "148/20505" 0.109521342151512 0.259382764786225 0.200038601866624 "ENSG00000156574/ENSG00000164690/ENSG00000114251" 3
GO:0002830 "GO:0002830" "positive regulation of type 2 immune response" "1/160" "15/20505" 0.110898565893491 0.259382764786225 0.200038601866624 "ENSG00000131203" 1
GO:0007351 "GO:0007351" "tripartite regional subdivision" "1/160" "15/20505" 0.110898565893491 0.259382764786225 0.200038601866624 "ENSG00000114251" 1
GO:0008595 "GO:0008595" "anterior/posterior axis specification, embryo" "1/160" "15/20505" 0.110898565893491 0.259382764786225 0.200038601866624 "ENSG00000114251" 1
GO:0010875 "GO:0010875" "positive regulation of cholesterol efflux" "1/160" "15/20505" 0.110898565893491 0.259382764786225 0.200038601866624 "ENSG00000160179" 1
GO:0010885 "GO:0010885" "regulation of cholesterol storage" "1/160" "15/20505" 0.110898565893491 0.259382764786225 0.200038601866624 "ENSG00000160179" 1
GO:0019372 "GO:0019372" "lipoxygenase pathway" "1/160" "15/20505" 0.110898565893491 0.259382764786225 0.200038601866624 "ENSG00000179148" 1
GO:0032645 "GO:0032645" "regulation of granulocyte macrophage colony-stimulating factor production" "1/160" "15/20505" 0.110898565893491 0.259382764786225 0.200038601866624 "ENSG00000110944" 1
GO:0032740 "GO:0032740" "positive regulation of interleukin-17 production" "1/160" "15/20505" 0.110898565893491 0.259382764786225 0.200038601866624 "ENSG00000110944" 1
GO:0034349 "GO:0034349" "glial cell apoptotic process" "1/160" "15/20505" 0.110898565893491 0.259382764786225 0.200038601866624 "ENSG00000198719" 1
GO:0035747 "GO:0035747" "natural killer cell chemotaxis" "1/160" "15/20505" 0.110898565893491 0.259382764786225 0.200038601866624 "ENSG00000145824" 1
GO:0042447 "GO:0042447" "hormone catabolic process" "1/160" "15/20505" 0.110898565893491 0.259382764786225 0.200038601866624 "ENSG00000197406" 1
GO:0042487 "GO:0042487" "regulation of odontogenesis of dentin-containing tooth" "1/160" "15/20505" 0.110898565893491 0.259382764786225 0.200038601866624 "ENSG00000107831" 1
GO:0043217 "GO:0043217" "myelin maintenance" "1/160" "15/20505" 0.110898565893491 0.259382764786225 0.200038601866624 "ENSG00000121966" 1
GO:0045080 "GO:0045080" "positive regulation of chemokine biosynthetic process" "1/160" "15/20505" 0.110898565893491 0.259382764786225 0.200038601866624 "ENSG00000114251" 1
GO:0045408 "GO:0045408" "regulation of interleukin-6 biosynthetic process" "1/160" "15/20505" 0.110898565893491 0.259382764786225 0.200038601866624 "ENSG00000142405" 1
GO:0045618 "GO:0045618" "positive regulation of keratinocyte differentiation" "1/160" "15/20505" 0.110898565893491 0.259382764786225 0.200038601866624 "ENSG00000054598" 1
GO:0046133 "GO:0046133" "pyrimidine ribonucleoside catabolic process" "1/160" "15/20505" 0.110898565893491 0.259382764786225 0.200038601866624 "ENSG00000158825" 1
GO:0060841 "GO:0060841" "venous blood vessel development" "1/160" "15/20505" 0.110898565893491 0.259382764786225 0.200038601866624 "ENSG00000103241" 1
GO:0072075 "GO:0072075" "metanephric mesenchyme development" "1/160" "15/20505" 0.110898565893491 0.259382764786225 0.200038601866624 "ENSG00000164690" 1
GO:0072178 "GO:0072178" "nephric duct morphogenesis" "1/160" "15/20505" 0.110898565893491 0.259382764786225 0.200038601866624 "ENSG00000273706" 1
GO:0090177 "GO:0090177" "establishment of planar polarity involved in neural tube closure" "1/160" "15/20505" 0.110898565893491 0.259382764786225 0.200038601866624 "ENSG00000114251" 1
GO:0097202 "GO:0097202" "activation of cysteine-type endopeptidase activity" "1/160" "15/20505" 0.110898565893491 0.259382764786225 0.200038601866624 "ENSG00000183454" 1
GO:0098703 "GO:0098703" "calcium ion import across plasma membrane" "1/160" "15/20505" 0.110898565893491 0.259382764786225 0.200038601866624 "ENSG00000100678" 1
GO:1902656 "GO:1902656" "calcium ion import into cytosol" "1/160" "15/20505" 0.110898565893491 0.259382764786225 0.200038601866624 "ENSG00000100678" 1
GO:1902993 "GO:1902993" "positive regulation of amyloid precursor protein catabolic process" "1/160" "15/20505" 0.110898565893491 0.259382764786225 0.200038601866624 "ENSG00000262655" 1
GO:1904469 "GO:1904469" "positive regulation of tumor necrosis factor secretion" "1/160" "15/20505" 0.110898565893491 0.259382764786225 0.200038601866624 "ENSG00000114251" 1
GO:2001028 "GO:2001028" "positive regulation of endothelial cell chemotaxis" "1/160" "15/20505" 0.110898565893491 0.259382764786225 0.200038601866624 "ENSG00000128052" 1
GO:2001170 "GO:2001170" "negative regulation of ATP biosynthetic process" "1/160" "15/20505" 0.110898565893491 0.259382764786225 0.200038601866624 "ENSG00000165140" 1
GO:0044706 "GO:0044706" "multi-multicellular organism process" "4/160" "234/20505" 0.111040353682536 0.259382764786225 0.200038601866624 "ENSG00000156574/ENSG00000131203/ENSG00000147596/ENSG00000148926" 4
GO:0097530 "GO:0097530" "granulocyte migration" "3/160" "149/20505" 0.111165875939327 0.259382764786225 0.200038601866624 "ENSG00000204936/ENSG00000110944/ENSG00000006606" 3
GO:0003208 "GO:0003208" "cardiac ventricle morphogenesis" "2/160" "73/20505" 0.111202046851941 0.259382764786225 0.200038601866624 "ENSG00000054598/ENSG00000103241" 2
GO:0030808 "GO:0030808" "regulation of nucleotide biosynthetic process" "2/160" "73/20505" 0.111202046851941 0.259382764786225 0.200038601866624 "ENSG00000165140/ENSG00000009950" 2
GO:0042130 "GO:0042130" "negative regulation of T cell proliferation" "2/160" "73/20505" 0.111202046851941 0.259382764786225 0.200038601866624 "ENSG00000164690/ENSG00000131203" 2
GO:0042531 "GO:0042531" "positive regulation of tyrosine phosphorylation of STAT protein" "2/160" "73/20505" 0.111202046851941 0.259382764786225 0.200038601866624 "ENSG00000110944/ENSG00000160712" 2
GO:0050771 "GO:0050771" "negative regulation of axonogenesis" "2/160" "73/20505" 0.111202046851941 0.259382764786225 0.200038601866624 "ENSG00000154342/ENSG00000114251" 2
GO:1903578 "GO:1903578" "regulation of ATP metabolic process" "2/160" "73/20505" 0.111202046851941 0.259382764786225 0.200038601866624 "ENSG00000165140/ENSG00000009950" 2
GO:0010594 "GO:0010594" "regulation of endothelial cell migration" "4/160" "235/20505" 0.112316834729401 0.261774296082469 0.201882974900488 "ENSG00000128052/ENSG00000126561/ENSG00000176692/ENSG00000114251" 4
GO:0030522 "GO:0030522" "intracellular receptor signaling pathway" "5/160" "327/20505" 0.113419286091915 0.26338964879265 0.203128751187638 "ENSG00000156574/ENSG00000169297/ENSG00000019549/ENSG00000179148/ENSG00000128918" 5
GO:0002312 "GO:0002312" "B cell activation involved in immune response" "2/160" "74/20505" 0.113730299632519 0.26338964879265 0.203128751187638 "ENSG00000100060/ENSG00000198719" 2
GO:0006081 "GO:0006081" "cellular aldehyde metabolic process" "2/160" "74/20505" 0.113730299632519 0.26338964879265 0.203128751187638 "ENSG00000184254/ENSG00000128918" 2
GO:0006687 "GO:0006687" "glycosphingolipid metabolic process" "2/160" "74/20505" 0.113730299632519 0.26338964879265 0.203128751187638 "ENSG00000105855/ENSG00000148488" 2
GO:0042310 "GO:0042310" "vasoconstriction" "2/160" "74/20505" 0.113730299632519 0.26338964879265 0.203128751187638 "ENSG00000148926/ENSG00000183023" 2
GO:0043297 "GO:0043297" "apical junction assembly" "2/160" "74/20505" 0.113730299632519 0.26338964879265 0.203128751187638 "ENSG00000165215/ENSG00000019549" 2
GO:0043627 "GO:0043627" "response to estrogen" "2/160" "74/20505" 0.113730299632519 0.26338964879265 0.203128751187638 "ENSG00000141448/ENSG00000125931" 2
GO:0050922 "GO:0050922" "negative regulation of chemotaxis" "2/160" "74/20505" 0.113730299632519 0.26338964879265 0.203128751187638 "ENSG00000154342/ENSG00000114251" 2
GO:0007612 "GO:0007612" "learning" "3/160" "151/20505" 0.114483401753619 0.264319229506696 0.203845653201205 "ENSG00000157680/ENSG00000100678/ENSG00000183454" 3
GO:0032635 "GO:0032635" "interleukin-6 production" "3/160" "151/20505" 0.114483401753619 0.264319229506696 0.203845653201205 "ENSG00000142405/ENSG00000160712/ENSG00000114251" 3
GO:0043280 "GO:0043280" "positive regulation of cysteine-type endopeptidase activity involved in apoptotic process" "3/160" "151/20505" 0.114483401753619 0.264319229506696 0.203845653201205 "ENSG00000156574/ENSG00000142405/ENSG00000154342" 3
GO:0051251 "GO:0051251" "positive regulation of lymphocyte activation" "5/160" "328/20505" 0.11449315001196 0.264319229506696 0.203845653201205 "ENSG00000164690/ENSG00000110944/ENSG00000198846/ENSG00000160712/ENSG00000154342" 5
GO:0042098 "GO:0042098" "T cell proliferation" "4/160" "238/20505" 0.116185459158351 0.265142881912298 0.204480862235917 "ENSG00000164690/ENSG00000131203/ENSG00000110944/ENSG00000160712" 4
GO:0032655 "GO:0032655" "regulation of interleukin-12 production" "2/160" "75/20505" 0.116273366324705 0.265142881912298 0.204480862235917 "ENSG00000131203/ENSG00000110944" 2
GO:0019722 "GO:0019722" "calcium-mediated signaling" "4/160" "239/20505" 0.11748793508404 0.265142881912298 0.204480862235917 "ENSG00000128052/ENSG00000121966/ENSG00000183023/ENSG00000183454" 4
GO:0042113 "GO:0042113" "B cell activation" "4/160" "239/20505" 0.11748793508404 0.265142881912298 0.204480862235917 "ENSG00000152804/ENSG00000100060/ENSG00000198719/ENSG00000154342" 4
GO:1903169 "GO:1903169" "regulation of calcium ion transmembrane transport" "3/160" "153/20505" 0.117838227815995 0.265142881912298 0.204480862235917 "ENSG00000103888/ENSG00000134817/ENSG00000183023" 3
GO:0002295 "GO:0002295" "T-helper cell lineage commitment" "1/160" "16/20505" 0.11784128084991 0.265142881912298 0.204480862235917 "ENSG00000110944" 1
GO:0003337 "GO:0003337" "mesenchymal to epithelial transition involved in metanephros morphogenesis" "1/160" "16/20505" 0.11784128084991 0.265142881912298 0.204480862235917 "ENSG00000125931" 1
GO:0006000 "GO:0006000" "fructose metabolic process" "1/160" "16/20505" 0.11784128084991 0.265142881912298 0.204480862235917 "ENSG00000165140" 1
GO:0006206 "GO:0006206" "pyrimidine nucleobase metabolic process" "1/160" "16/20505" 0.11784128084991 0.265142881912298 0.204480862235917 "ENSG00000158825" 1
GO:0006586 "GO:0006586" "indolalkylamine metabolic process" "1/160" "16/20505" 0.11784128084991 0.265142881912298 0.204480862235917 "ENSG00000131203" 1
GO:0007216 "GO:0007216" "G protein-coupled glutamate receptor signaling pathway" "1/160" "16/20505" 0.11784128084991 0.265142881912298 0.204480862235917 "ENSG00000124493" 1
GO:0014857 "GO:0014857" "regulation of skeletal muscle cell proliferation" "1/160" "16/20505" 0.11784128084991 0.265142881912298 0.204480862235917 "ENSG00000164690" 1
GO:0018216 "GO:0018216" "peptidyl-arginine methylation" "1/160" "16/20505" 0.11784128084991 0.265142881912298 0.204480862235917 "ENSG00000147596" 1
GO:0030214 "GO:0030214" "hyaluronan catabolic process" "1/160" "16/20505" 0.11784128084991 0.265142881912298 0.204480862235917 "ENSG00000103888" 1
GO:0031000 "GO:0031000" "response to caffeine" "1/160" "16/20505" 0.11784128084991 0.265142881912298 0.204480862235917 "ENSG00000183023" 1
GO:0034244 "GO:0034244" "negative regulation of transcription elongation from RNA polymerase II promoter" "1/160" "16/20505" 0.11784128084991 0.265142881912298 0.204480862235917 "ENSG00000164690" 1
GO:0034331 "GO:0034331" "cell junction maintenance" "1/160" "16/20505" 0.11784128084991 0.265142881912298 0.204480862235917 "ENSG00000204936" 1
GO:0035988 "GO:0035988" "chondrocyte proliferation" "1/160" "16/20505" 0.11784128084991 0.265142881912298 0.204480862235917 "ENSG00000162733" 1
GO:0036270 "GO:0036270" "response to diuretic" "1/160" "16/20505" 0.11784128084991 0.265142881912298 0.204480862235917 "ENSG00000183023" 1
GO:0038063 "GO:0038063" "collagen-activated tyrosine kinase receptor signaling pathway" "1/160" "16/20505" 0.11784128084991 0.265142881912298 0.204480862235917 "ENSG00000162733" 1
GO:0042448 "GO:0042448" "progesterone metabolic process" "1/160" "16/20505" 0.11784128084991 0.265142881912298 0.204480862235917 "ENSG00000148926" 1
GO:0043101 "GO:0043101" "purine-containing compound salvage" "1/160" "16/20505" 0.11784128084991 0.265142881912298 0.204480862235917 "ENSG00000137198" 1
GO:0043174 "GO:0043174" "nucleoside salvage" "1/160" "16/20505" 0.11784128084991 0.265142881912298 0.204480862235917 "ENSG00000158825" 1
GO:0043518 "GO:0043518" "negative regulation of DNA damage response, signal transduction by p53 class mediator" "1/160" "16/20505" 0.11784128084991 0.265142881912298 0.204480862235917 "ENSG00000019549" 1
GO:0045836 "GO:0045836" "positive regulation of meiotic nuclear division" "1/160" "16/20505" 0.11784128084991 0.265142881912298 0.204480862235917 "ENSG00000114251" 1
GO:0060026 "GO:0060026" "convergent extension" "1/160" "16/20505" 0.11784128084991 0.265142881912298 0.204480862235917 "ENSG00000114251" 1
GO:0060556 "GO:0060556" "regulation of vitamin D biosynthetic process" "1/160" "16/20505" 0.11784128084991 0.265142881912298 0.204480862235917 "ENSG00000019549" 1
GO:0060766 "GO:0060766" "negative regulation of androgen receptor signaling pathway" "1/160" "16/20505" 0.11784128084991 0.265142881912298 0.204480862235917 "ENSG00000156574" 1
GO:0072160 "GO:0072160" "nephron tubule epithelial cell differentiation" "1/160" "16/20505" 0.11784128084991 0.265142881912298 0.204480862235917 "ENSG00000273706" 1
GO:0072488 "GO:0072488" "ammonium transmembrane transport" "1/160" "16/20505" 0.11784128084991 0.265142881912298 0.204480862235917 "ENSG00000145832" 1
GO:0090141 "GO:0090141" "positive regulation of mitochondrial fission" "1/160" "16/20505" 0.11784128084991 0.265142881912298 0.204480862235917 "ENSG00000128052" 1
GO:1900239 "GO:1900239" "regulation of phenotypic switching" "1/160" "16/20505" 0.11784128084991 0.265142881912298 0.204480862235917 "ENSG00000102678" 1
GO:2000647 "GO:2000647" "negative regulation of stem cell proliferation" "1/160" "16/20505" 0.11784128084991 0.265142881912298 0.204480862235917 "ENSG00000019549" 1
GO:0019915 "GO:0019915" "lipid storage" "2/160" "76/20505" 0.118830865629384 0.267163936945387 0.206039520242543 "ENSG00000160179/ENSG00000106484" 2
GO:0051402 "GO:0051402" "neuron apoptotic process" "4/160" "241/20505" 0.120112058695895 0.269836998222346 0.208101012034363 "ENSG00000124493/ENSG00000125931/ENSG00000197406/ENSG00000107831" 4
GO:0046651 "GO:0046651" "lymphocyte proliferation" "5/160" "334/20505" 0.121038705327197 0.271051706297868 0.20903780714218 "ENSG00000164690/ENSG00000131203/ENSG00000110944/ENSG00000160712/ENSG00000154342" 5
GO:0010977 "GO:0010977" "negative regulation of neuron projection development" "3/160" "155/20505" 0.121229578085936 0.271051706297868 0.20903780714218 "ENSG00000149922/ENSG00000154342/ENSG00000114251" 3
GO:0006096 "GO:0006096" "glycolytic process" "2/160" "77/20505" 0.121402421227662 0.271051706297868 0.20903780714218 "ENSG00000165140/ENSG00000009950" 2
GO:0032615 "GO:0032615" "interleukin-12 production" "2/160" "77/20505" 0.121402421227662 0.271051706297868 0.20903780714218 "ENSG00000131203/ENSG00000110944" 2
GO:0042440 "GO:0042440" "pigment metabolic process" "2/160" "77/20505" 0.121402421227662 0.271051706297868 0.20903780714218 "ENSG00000125931/ENSG00000114251" 2
GO:0051966 "GO:0051966" "regulation of synaptic transmission, glutamatergic" "2/160" "77/20505" 0.121402421227662 0.271051706297868 0.20903780714218 "ENSG00000157680/ENSG00000124493" 2
GO:0071230 "GO:0071230" "cellular response to amino acid stimulus" "2/160" "77/20505" 0.121402421227662 0.271051706297868 0.20903780714218 "ENSG00000204262/ENSG00000134853" 2
GO:1901616 "GO:1901616" "organic hydroxy compound catabolic process" "2/160" "77/20505" 0.121402421227662 0.271051706297868 0.20903780714218 "ENSG00000074660/ENSG00000197406" 2
GO:0009266 "GO:0009266" "response to temperature stimulus" "4/160" "243/20505" 0.122761485340396 0.271051706297868 0.20903780714218 "ENSG00000101276/ENSG00000148926/ENSG00000137198/ENSG00000168079" 4
GO:0014065 "GO:0014065" "phosphatidylinositol 3-kinase signaling" "3/160" "156/20505" 0.122938706425199 0.271051706297868 0.20903780714218 "ENSG00000101445/ENSG00000128052/ENSG00000134853" 3
GO:1903305 "GO:1903305" "regulation of regulated secretory pathway" "3/160" "156/20505" 0.122938706425199 0.271051706297868 0.20903780714218 "ENSG00000204936/ENSG00000157680/ENSG00000103241" 3
GO:0032943 "GO:0032943" "mononuclear cell proliferation" "5/160" "336/20505" 0.123259094492313 0.271051706297868 0.20903780714218 "ENSG00000164690/ENSG00000131203/ENSG00000110944/ENSG00000160712/ENSG00000154342" 5
GO:0006757 "GO:0006757" "ATP generation from ADP" "2/160" "78/20505" 0.123987661727181 0.271051706297868 0.20903780714218 "ENSG00000165140/ENSG00000009950" 2
GO:0051193 "GO:0051193" "regulation of cofactor metabolic process" "2/160" "78/20505" 0.123987661727181 0.271051706297868 0.20903780714218 "ENSG00000165140/ENSG00000009950" 2
GO:0002031 "GO:0002031" "G protein-coupled receptor internalization" "1/160" "17/20505" 0.124730118522028 0.271051706297868 0.20903780714218 "ENSG00000148926" 1
GO:0002678 "GO:0002678" "positive regulation of chronic inflammatory response" "1/160" "17/20505" 0.124730118522028 0.271051706297868 0.20903780714218 "ENSG00000131203" 1
GO:0006590 "GO:0006590" "thyroid hormone generation" "1/160" "17/20505" 0.124730118522028 0.271051706297868 0.20903780714218 "ENSG00000197406" 1
GO:0006883 "GO:0006883" "cellular sodium ion homeostasis" "1/160" "17/20505" 0.124730118522028 0.271051706297868 0.20903780714218 "ENSG00000183023" 1
GO:0007158 "GO:0007158" "neuron cell-cell adhesion" "1/160" "17/20505" 0.124730118522028 0.271051706297868 0.20903780714218 "ENSG00000165731" 1
GO:0010820 "GO:0010820" "positive regulation of T cell chemotaxis" "1/160" "17/20505" 0.124730118522028 0.271051706297868 0.20903780714218 "ENSG00000114251" 1
GO:0010878 "GO:0010878" "cholesterol storage" "1/160" "17/20505" 0.124730118522028 0.271051706297868 0.20903780714218 "ENSG00000160179" 1
GO:0014856 "GO:0014856" "skeletal muscle cell proliferation" "1/160" "17/20505" 0.124730118522028 0.271051706297868 0.20903780714218 "ENSG00000164690" 1
GO:0021535 "GO:0021535" "cell migration in hindbrain" "1/160" "17/20505" 0.124730118522028 0.271051706297868 0.20903780714218 "ENSG00000076356" 1
GO:0021783 "GO:0021783" "preganglionic parasympathetic fiber development" "1/160" "17/20505" 0.124730118522028 0.271051706297868 0.20903780714218 "ENSG00000165462" 1
GO:0030809 "GO:0030809" "negative regulation of nucleotide biosynthetic process" "1/160" "17/20505" 0.124730118522028 0.271051706297868 0.20903780714218 "ENSG00000165140" 1
GO:0042226 "GO:0042226" "interleukin-6 biosynthetic process" "1/160" "17/20505" 0.124730118522028 0.271051706297868 0.20903780714218 "ENSG00000142405" 1
GO:0042249 "GO:0042249" "establishment of planar polarity of embryonic epithelium" "1/160" "17/20505" 0.124730118522028 0.271051706297868 0.20903780714218 "ENSG00000114251" 1
GO:0043373 "GO:0043373" "CD4-positive, alpha-beta T cell lineage commitment" "1/160" "17/20505" 0.124730118522028 0.271051706297868 0.20903780714218 "ENSG00000110944" 1
GO:0043651 "GO:0043651" "linoleic acid metabolic process" "1/160" "17/20505" 0.124730118522028 0.271051706297868 0.20903780714218 "ENSG00000179148" 1
GO:0046519 "GO:0046519" "sphingoid metabolic process" "1/160" "17/20505" 0.124730118522028 0.271051706297868 0.20903780714218 "ENSG00000172296" 1
GO:0048820 "GO:0048820" "hair follicle maturation" "1/160" "17/20505" 0.124730118522028 0.271051706297868 0.20903780714218 "ENSG00000114251" 1
GO:0051782 "GO:0051782" "negative regulation of cell division" "1/160" "17/20505" 0.124730118522028 0.271051706297868 0.20903780714218 "ENSG00000099994" 1
GO:0055089 "GO:0055089" "fatty acid homeostasis" "1/160" "17/20505" 0.124730118522028 0.271051706297868 0.20903780714218 "ENSG00000009950" 1
GO:0055119 "GO:0055119" "relaxation of cardiac muscle" "1/160" "17/20505" 0.124730118522028 0.271051706297868 0.20903780714218 "ENSG00000183023" 1
GO:0060644 "GO:0060644" "mammary gland epithelial cell differentiation" "1/160" "17/20505" 0.124730118522028 0.271051706297868 0.20903780714218 "ENSG00000103241" 1
GO:0060693 "GO:0060693" "regulation of branching involved in salivary gland morphogenesis" "1/160" "17/20505" 0.124730118522028 0.271051706297868 0.20903780714218 "ENSG00000019549" 1
GO:0060850 "GO:0060850" "regulation of transcription involved in cell fate commitment" "1/160" "17/20505" 0.124730118522028 0.271051706297868 0.20903780714218 "ENSG00000164736" 1
GO:0072574 "GO:0072574" "hepatocyte proliferation" "1/160" "17/20505" 0.124730118522028 0.271051706297868 0.20903780714218 "ENSG00000154342" 1
GO:0072575 "GO:0072575" "epithelial cell proliferation involved in liver morphogenesis" "1/160" "17/20505" 0.124730118522028 0.271051706297868 0.20903780714218 "ENSG00000154342" 1
GO:0097067 "GO:0097067" "cellular response to thyroid hormone stimulus" "1/160" "17/20505" 0.124730118522028 0.271051706297868 0.20903780714218 "ENSG00000135363" 1
GO:0098719 "GO:0098719" "sodium ion import across plasma membrane" "1/160" "17/20505" 0.124730118522028 0.271051706297868 0.20903780714218 "ENSG00000183023" 1
GO:1900372 "GO:1900372" "negative regulation of purine nucleotide biosynthetic process" "1/160" "17/20505" 0.124730118522028 0.271051706297868 0.20903780714218 "ENSG00000165140" 1
GO:2000484 "GO:2000484" "positive regulation of interleukin-8 secretion" "1/160" "17/20505" 0.124730118522028 0.271051706297868 0.20903780714218 "ENSG00000114251" 1
GO:2000811 "GO:2000811" "negative regulation of anoikis" "1/160" "17/20505" 0.124730118522028 0.271051706297868 0.20903780714218 "ENSG00000019549" 1
GO:0043122 "GO:0043122" "regulation of I-kappaB kinase/NF-kappaB signaling" "4/160" "245/20505" 0.125435899958628 0.272181014376102 0.209908740911556 "ENSG00000142405/ENSG00000102096/ENSG00000135960/ENSG00000114251" 4
GO:0050807 "GO:0050807" "regulation of synapse organization" "4/160" "245/20505" 0.125435899958628 0.272181014376102 0.209908740911556 "ENSG00000141668/ENSG00000154342/ENSG00000187122/ENSG00000114251" 4
GO:0001933 "GO:0001933" "negative regulation of protein phosphorylation" "6/160" "435/20505" 0.125754110467903 0.272669216544563 0.210285247343229 "ENSG00000152804/ENSG00000142405/ENSG00000146904/ENSG00000009950/ENSG00000185614/ENSG00000168675" 6
GO:0050701 "GO:0050701" "interleukin-1 secretion" "2/160" "79/20505" 0.126586220608957 0.274067131962398 0.211363333799521 "ENSG00000142405/ENSG00000114251" 2
GO:0070227 "GO:0070227" "lymphocyte apoptotic process" "2/160" "79/20505" 0.126586220608957 0.274067131962398 0.211363333799521 "ENSG00000131203/ENSG00000114251" 2
GO:0046467 "GO:0046467" "membrane lipid biosynthetic process" "3/160" "159/20505" 0.128118732176396 0.277010218724184 0.213633071966146 "ENSG00000172296/ENSG00000179148/ENSG00000148488" 3
GO:0007160 "GO:0007160" "cell-matrix adhesion" "4/160" "247/20505" 0.128134983225238 0.277010218724184 0.213633071966146 "ENSG00000128052/ENSG00000146904/ENSG00000128652/ENSG00000165816" 4
GO:0033143 "GO:0033143" "regulation of intracellular steroid hormone receptor signaling pathway" "2/160" "80/20505" 0.129197736174747 0.278256739788095 0.214594401571169 "ENSG00000156574/ENSG00000169297" 2
GO:0040013 "GO:0040013" "negative regulation of locomotion" "6/160" "439/20505" 0.129709959580294 0.278256739788095 0.214594401571169 "ENSG00000156574/ENSG00000164690/ENSG00000146904/ENSG00000154342/ENSG00000114251/ENSG00000168675" 6
GO:0002666 "GO:0002666" "positive regulation of T cell tolerance induction" "1/160" "18/20505" 0.131565494402371 0.278256739788095 0.214594401571169 "ENSG00000131203" 1
GO:0003414 "GO:0003414" "chondrocyte morphogenesis involved in endochondral bone morphogenesis" "1/160" "18/20505" 0.131565494402371 0.278256739788095 0.214594401571169 "ENSG00000165816" 1
GO:0003429 "GO:0003429" "growth plate cartilage chondrocyte morphogenesis" "1/160" "18/20505" 0.131565494402371 0.278256739788095 0.214594401571169 "ENSG00000165816" 1
GO:0010544 "GO:0010544" "negative regulation of platelet activation" "1/160" "18/20505" 0.131565494402371 0.278256739788095 0.214594401571169 "ENSG00000134853" 1
GO:0010819 "GO:0010819" "regulation of T cell chemotaxis" "1/160" "18/20505" 0.131565494402371 0.278256739788095 0.214594401571169 "ENSG00000114251" 1
GO:0016973 "GO:0016973" "poly(A)+ mRNA export from nucleus" "1/160" "18/20505" 0.131565494402371 0.278256739788095 0.214594401571169 "ENSG00000152804" 1
GO:0032026 "GO:0032026" "response to magnesium ion" "1/160" "18/20505" 0.131565494402371 0.278256739788095 0.214594401571169 "ENSG00000165140" 1
GO:0032785 "GO:0032785" "negative regulation of DNA-templated transcription, elongation" "1/160" "18/20505" 0.131565494402371 0.278256739788095 0.214594401571169 "ENSG00000164690" 1
GO:0032930 "GO:0032930" "positive regulation of superoxide anion generation" "1/160" "18/20505" 0.131565494402371 0.278256739788095 0.214594401571169 "ENSG00000204936" 1
GO:0042368 "GO:0042368" "vitamin D biosynthetic process" "1/160" "18/20505" 0.131565494402371 0.278256739788095 0.214594401571169 "ENSG00000019549" 1
GO:0048490 "GO:0048490" "anterograde synaptic vesicle transport" "1/160" "18/20505" 0.131565494402371 0.278256739788095 0.214594401571169 "ENSG00000103723" 1
GO:0048532 "GO:0048532" "anatomical structure arrangement" "1/160" "18/20505" 0.131565494402371 0.278256739788095 0.214594401571169 "ENSG00000198719" 1
GO:0051767 "GO:0051767" "nitric-oxide synthase biosynthetic process" "1/160" "18/20505" 0.131565494402371 0.278256739788095 0.214594401571169 "ENSG00000128052" 1
GO:0051769 "GO:0051769" "regulation of nitric-oxide synthase biosynthetic process" "1/160" "18/20505" 0.131565494402371 0.278256739788095 0.214594401571169 "ENSG00000128052" 1
GO:0051798 "GO:0051798" "positive regulation of hair follicle development" "1/160" "18/20505" 0.131565494402371 0.278256739788095 0.214594401571169 "ENSG00000114251" 1
GO:0060219 "GO:0060219" "camera-type eye photoreceptor cell differentiation" "1/160" "18/20505" 0.131565494402371 0.278256739788095 0.214594401571169 "ENSG00000197406" 1
GO:0061298 "GO:0061298" "retina vasculature development in camera-type eye" "1/160" "18/20505" 0.131565494402371 0.278256739788095 0.214594401571169 "ENSG00000134853" 1
GO:0061323 "GO:0061323" "cell proliferation involved in heart morphogenesis" "1/160" "18/20505" 0.131565494402371 0.278256739788095 0.214594401571169 "ENSG00000164093" 1
GO:0070102 "GO:0070102" "interleukin-6-mediated signaling pathway" "1/160" "18/20505" 0.131565494402371 0.278256739788095 0.214594401571169 "ENSG00000160712" 1
GO:0070242 "GO:0070242" "thymocyte apoptotic process" "1/160" "18/20505" 0.131565494402371 0.278256739788095 0.214594401571169 "ENSG00000114251" 1
GO:0071371 "GO:0071371" "cellular response to gonadotropin stimulus" "1/160" "18/20505" 0.131565494402371 0.278256739788095 0.214594401571169 "ENSG00000141448" 1
GO:0072576 "GO:0072576" "liver morphogenesis" "1/160" "18/20505" 0.131565494402371 0.278256739788095 0.214594401571169 "ENSG00000154342" 1
GO:0090171 "GO:0090171" "chondrocyte morphogenesis" "1/160" "18/20505" 0.131565494402371 0.278256739788095 0.214594401571169 "ENSG00000165816" 1
GO:0099514 "GO:0099514" "synaptic vesicle cytoskeletal transport" "1/160" "18/20505" 0.131565494402371 0.278256739788095 0.214594401571169 "ENSG00000103723" 1
GO:0099517 "GO:0099517" "synaptic vesicle transport along microtubule" "1/160" "18/20505" 0.131565494402371 0.278256739788095 0.214594401571169 "ENSG00000103723" 1
GO:1901317 "GO:1901317" "regulation of flagellated sperm motility" "1/160" "18/20505" 0.131565494402371 0.278256739788095 0.214594401571169 "ENSG00000147596" 1
GO:1905276 "GO:1905276" "regulation of epithelial tube formation" "1/160" "18/20505" 0.131565494402371 0.278256739788095 0.214594401571169 "ENSG00000114251" 1
GO:2000319 "GO:2000319" "regulation of T-helper 17 cell differentiation" "1/160" "18/20505" 0.131565494402371 0.278256739788095 0.214594401571169 "ENSG00000110944" 1
GO:0042866 "GO:0042866" "pyruvate biosynthetic process" "2/160" "81/20505" 0.13182185149492 0.278597482386302 0.21485718569639 "ENSG00000165140/ENSG00000009950" 2
GO:0009100 "GO:0009100" "glycoprotein metabolic process" "6/160" "443/20505" 0.133725603798466 0.282416888888456 0.217802750476999 "ENSG00000182050/ENSG00000156966/ENSG00000100060/ENSG00000107742/ENSG00000176928/ENSG00000148488" 6
GO:0014068 "GO:0014068" "positive regulation of phosphatidylinositol 3-kinase signaling" "2/160" "82/20505" 0.134458214356853 0.283554633737415 0.218680190768972 "ENSG00000128052/ENSG00000134853" 2
GO:1905954 "GO:1905954" "positive regulation of lipid localization" "2/160" "82/20505" 0.134458214356853 0.283554633737415 0.218680190768972 "ENSG00000121207/ENSG00000160179" 2
GO:0006813 "GO:0006813" "potassium ion transport" "4/160" "252/20505" 0.134988484835354 0.284263008022614 0.219226496155632 "ENSG00000124780/ENSG00000120457/ENSG00000185760/ENSG00000162989" 4
GO:0050803 "GO:0050803" "regulation of synapse structure or activity" "4/160" "252/20505" 0.134988484835354 0.284263008022614 0.219226496155632 "ENSG00000141668/ENSG00000154342/ENSG00000187122/ENSG00000114251" 4
GO:0001736 "GO:0001736" "establishment of planar polarity" "2/160" "83/20505" 0.137106477213823 0.284776478422379 0.219622489701901 "ENSG00000146374/ENSG00000114251" 2
GO:0007164 "GO:0007164" "establishment of tissue polarity" "2/160" "83/20505" 0.137106477213823 0.284776478422379 0.219622489701901 "ENSG00000146374/ENSG00000114251" 2
GO:0055021 "GO:0055021" "regulation of cardiac muscle tissue growth" "2/160" "83/20505" 0.137106477213823 0.284776478422379 0.219622489701901 "ENSG00000141448/ENSG00000102678" 2
GO:0060415 "GO:0060415" "muscle tissue morphogenesis" "2/160" "83/20505" 0.137106477213823 0.284776478422379 0.219622489701901 "ENSG00000054598/ENSG00000114251" 2
GO:0061180 "GO:0061180" "mammary gland epithelium development" "2/160" "83/20505" 0.137106477213823 0.284776478422379 0.219622489701901 "ENSG00000103241/ENSG00000114251" 2
GO:0097756 "GO:0097756" "negative regulation of blood vessel diameter" "2/160" "83/20505" 0.137106477213823 0.284776478422379 0.219622489701901 "ENSG00000148926/ENSG00000183023" 2
GO:0043434 "GO:0043434" "response to peptide hormone" "6/160" "447/20505" 0.137800226135242 0.284776478422379 0.219622489701901 "ENSG00000152804/ENSG00000148926/ENSG00000126561/ENSG00000176692/ENSG00000165816/ENSG00000125931" 6
GO:0002076 "GO:0002076" "osteoblast development" "1/160" "19/20505" 0.138347820799385 0.284776478422379 0.219622489701901 "ENSG00000164690" 1
GO:0002363 "GO:0002363" "alpha-beta T cell lineage commitment" "1/160" "19/20505" 0.138347820799385 0.284776478422379 0.219622489701901 "ENSG00000110944" 1
GO:0003422 "GO:0003422" "growth plate cartilage morphogenesis" "1/160" "19/20505" 0.138347820799385 0.284776478422379 0.219622489701901 "ENSG00000165816" 1
GO:0007350 "GO:0007350" "blastoderm segmentation" "1/160" "19/20505" 0.138347820799385 0.284776478422379 0.219622489701901 "ENSG00000114251" 1
GO:0009048 "GO:0009048" "dosage compensation by inactivation of X chromosome" "1/160" "19/20505" 0.138347820799385 0.284776478422379 0.219622489701901 "ENSG00000147596" 1
GO:0030656 "GO:0030656" "regulation of vitamin metabolic process" "1/160" "19/20505" 0.138347820799385 0.284776478422379 0.219622489701901 "ENSG00000019549" 1
GO:0030949 "GO:0030949" "positive regulation of vascular endothelial growth factor receptor signaling pathway" "1/160" "19/20505" 0.138347820799385 0.284776478422379 0.219622489701901 "ENSG00000102678" 1
GO:0032604 "GO:0032604" "granulocyte macrophage colony-stimulating factor production" "1/160" "19/20505" 0.138347820799385 0.284776478422379 0.219622489701901 "ENSG00000110944" 1
GO:0034755 "GO:0034755" "iron ion transmembrane transport" "1/160" "19/20505" 0.138347820799385 0.284776478422379 0.219622489701901 "ENSG00000168079" 1
GO:0036166 "GO:0036166" "phenotypic switching" "1/160" "19/20505" 0.138347820799385 0.284776478422379 0.219622489701901 "ENSG00000102678" 1
GO:0042635 "GO:0042635" "positive regulation of hair cycle" "1/160" "19/20505" 0.138347820799385 0.284776478422379 0.219622489701901 "ENSG00000114251" 1
GO:0042693 "GO:0042693" "muscle cell fate commitment" "1/160" "19/20505" 0.138347820799385 0.284776478422379 0.219622489701901 "ENSG00000154342" 1
GO:0044342 "GO:0044342" "type B pancreatic cell proliferation" "1/160" "19/20505" 0.138347820799385 0.284776478422379 0.219622489701901 "ENSG00000154342" 1
GO:0045073 "GO:0045073" "regulation of chemokine biosynthetic process" "1/160" "19/20505" 0.138347820799385 0.284776478422379 0.219622489701901 "ENSG00000114251" 1
GO:0045821 "GO:0045821" "positive regulation of glycolytic process" "1/160" "19/20505" 0.138347820799385 0.284776478422379 0.219622489701901 "ENSG00000009950" 1
GO:0048486 "GO:0048486" "parasympathetic nervous system development" "1/160" "19/20505" 0.138347820799385 0.284776478422379 0.219622489701901 "ENSG00000165462" 1
GO:0060004 "GO:0060004" "reflex" "1/160" "19/20505" 0.138347820799385 0.284776478422379 0.219622489701901 "ENSG00000184254" 1
GO:0060965 "GO:0060965" "negative regulation of gene silencing by miRNA" "1/160" "19/20505" 0.138347820799385 0.284776478422379 0.219622489701901 "ENSG00000256453" 1
GO:0061081 "GO:0061081" "positive regulation of myeloid leukocyte cytokine production involved in immune response" "1/160" "19/20505" 0.138347820799385 0.284776478422379 0.219622489701901 "ENSG00000114251" 1
GO:0070166 "GO:0070166" "enamel mineralization" "1/160" "19/20505" 0.138347820799385 0.284776478422379 0.219622489701901 "ENSG00000177706" 1
GO:0071871 "GO:0071871" "response to epinephrine" "1/160" "19/20505" 0.138347820799385 0.284776478422379 0.219622489701901 "ENSG00000181195" 1
GO:0072074 "GO:0072074" "kidney mesenchyme development" "1/160" "19/20505" 0.138347820799385 0.284776478422379 0.219622489701901 "ENSG00000164690" 1
GO:0072111 "GO:0072111" "cell proliferation involved in kidney development" "1/160" "19/20505" 0.138347820799385 0.284776478422379 0.219622489701901 "ENSG00000164690" 1
GO:0072148 "GO:0072148" "epithelial cell fate commitment" "1/160" "19/20505" 0.138347820799385 0.284776478422379 0.219622489701901 "ENSG00000198719" 1
GO:0072176 "GO:0072176" "nephric duct development" "1/160" "19/20505" 0.138347820799385 0.284776478422379 0.219622489701901 "ENSG00000273706" 1
GO:0034109 "GO:0034109" "homotypic cell-cell adhesion" "2/160" "84/20505" 0.139766297134408 0.287090181964988 0.221406841187933 "ENSG00000154342/ENSG00000134853" 2
GO:0042509 "GO:0042509" "regulation of tyrosine phosphorylation of STAT protein" "2/160" "84/20505" 0.139766297134408 0.287090181964988 0.221406841187933 "ENSG00000110944/ENSG00000160712" 2
GO:0045921 "GO:0045921" "positive regulation of exocytosis" "2/160" "84/20505" 0.139766297134408 0.287090181964988 0.221406841187933 "ENSG00000204936/ENSG00000102362" 2
GO:0043535 "GO:0043535" "regulation of blood vessel endothelial cell migration" "3/160" "166/20505" 0.140499948044233 0.288192389922428 0.22225687507108 "ENSG00000128052/ENSG00000126561/ENSG00000176692" 3
GO:0071456 "GO:0071456" "cellular response to hypoxia" "3/160" "166/20505" 0.140499948044233 0.288192389922428 0.22225687507108 "ENSG00000141448/ENSG00000100678/ENSG00000183023" 3
GO:0006109 "GO:0006109" "regulation of carbohydrate metabolic process" "3/160" "167/20505" 0.142300908106393 0.291134316330631 0.224525718361329 "ENSG00000160180/ENSG00000165140/ENSG00000009950" 3
GO:0046889 "GO:0046889" "positive regulation of lipid biosynthetic process" "2/160" "85/20505" 0.142437335752385 0.291134316330631 0.224525718361329 "ENSG00000009950/ENSG00000160179" 2
GO:0050730 "GO:0050730" "regulation of peptidyl-tyrosine phosphorylation" "4/160" "258/20505" 0.143406251571962 0.291134316330631 0.224525718361329 "ENSG00000110944/ENSG00000160712/ENSG00000163235/ENSG00000154342" 4
GO:0051262 "GO:0051262" "protein tetramerization" "3/160" "168/20505" 0.144109626888494 0.291134316330631 0.224525718361329 "ENSG00000184254/ENSG00000158825/ENSG00000165140" 3
GO:0002320 "GO:0002320" "lymphoid progenitor cell differentiation" "1/160" "20/20505" 0.145077506861676 0.291134316330631 0.224525718361329 "ENSG00000164690" 1
GO:0006103 "GO:0006103" "2-oxoglutarate metabolic process" "1/160" "20/20505" 0.145077506861676 0.291134316330631 0.224525718361329 "ENSG00000126561" 1
GO:0007097 "GO:0007097" "nuclear migration" "1/160" "20/20505" 0.145077506861676 0.291134316330631 0.224525718361329 "ENSG00000187122" 1
GO:0009312 "GO:0009312" "oligosaccharide biosynthetic process" "1/160" "20/20505" 0.145077506861676 0.291134316330631 0.224525718361329 "ENSG00000165140" 1
GO:0021533 "GO:0021533" "cell differentiation in hindbrain" "1/160" "20/20505" 0.145077506861676 0.291134316330631 0.224525718361329 "ENSG00000273706" 1
GO:0030813 "GO:0030813" "positive regulation of nucleotide catabolic process" "1/160" "20/20505" 0.145077506861676 0.291134316330631 0.224525718361329 "ENSG00000009950" 1
GO:0033141 "GO:0033141" "positive regulation of peptidyl-serine phosphorylation of STAT protein" "1/160" "20/20505" 0.145077506861676 0.291134316330631 0.224525718361329 "ENSG00000165731" 1
GO:0035994 "GO:0035994" "response to muscle stretch" "1/160" "20/20505" 0.145077506861676 0.291134316330631 0.224525718361329 "ENSG00000183023" 1
GO:0036065 "GO:0036065" "fucosylation" "1/160" "20/20505" 0.145077506861676 0.291134316330631 0.224525718361329 "ENSG00000100060" 1
GO:0042033 "GO:0042033" "chemokine biosynthetic process" "1/160" "20/20505" 0.145077506861676 0.291134316330631 0.224525718361329 "ENSG00000114251" 1
GO:0042474 "GO:0042474" "middle ear morphogenesis" "1/160" "20/20505" 0.145077506861676 0.291134316330631 0.224525718361329 "ENSG00000133937" 1
GO:0045723 "GO:0045723" "positive regulation of fatty acid biosynthetic process" "1/160" "20/20505" 0.145077506861676 0.291134316330631 0.224525718361329 "ENSG00000009950" 1
GO:0050755 "GO:0050755" "chemokine metabolic process" "1/160" "20/20505" 0.145077506861676 0.291134316330631 0.224525718361329 "ENSG00000114251" 1
GO:0051197 "GO:0051197" "positive regulation of coenzyme metabolic process" "1/160" "20/20505" 0.145077506861676 0.291134316330631 0.224525718361329 "ENSG00000009950" 1
GO:0060008 "GO:0060008" "Sertoli cell differentiation" "1/160" "20/20505" 0.145077506861676 0.291134316330631 0.224525718361329 "ENSG00000169297" 1
GO:0061436 "GO:0061436" "establishment of skin barrier" "1/160" "20/20505" 0.145077506861676 0.291134316330631 0.224525718361329 "ENSG00000179148" 1
GO:0090370 "GO:0090370" "negative regulation of cholesterol efflux" "1/160" "20/20505" 0.145077506861676 0.291134316330631 0.224525718361329 "ENSG00000164690" 1
GO:0140058 "GO:0140058" "neuron projection arborization" "1/160" "20/20505" 0.145077506861676 0.291134316330631 0.224525718361329 "ENSG00000114251" 1
GO:1903055 "GO:1903055" "positive regulation of extracellular matrix organization" "1/160" "20/20505" 0.145077506861676 0.291134316330631 0.224525718361329 "ENSG00000162733" 1
GO:2000737 "GO:2000737" "negative regulation of stem cell differentiation" "1/160" "20/20505" 0.145077506861676 0.291134316330631 0.224525718361329 "ENSG00000154342" 1
GO:0014015 "GO:0014015" "positive regulation of gliogenesis" "2/160" "86/20505" 0.145119259217115 0.291134316330631 0.224525718361329 "ENSG00000164690/ENSG00000121966" 2
GO:0016266 "GO:0016266" "O-glycan processing" "2/160" "86/20505" 0.145119259217115 0.291134316330631 0.224525718361329 "ENSG00000156966/ENSG00000176928" 2
GO:0034637 "GO:0034637" "cellular carbohydrate biosynthetic process" "2/160" "86/20505" 0.145119259217115 0.291134316330631 0.224525718361329 "ENSG00000156966/ENSG00000165140" 2
GO:0038034 "GO:0038034" "signal transduction in absence of ligand" "2/160" "86/20505" 0.145119259217115 0.291134316330631 0.224525718361329 "ENSG00000165731/ENSG00000019549" 2
GO:0048708 "GO:0048708" "astrocyte differentiation" "2/160" "86/20505" 0.145119259217115 0.291134316330631 0.224525718361329 "ENSG00000164690/ENSG00000198719" 2
GO:0055072 "GO:0055072" "iron ion homeostasis" "2/160" "86/20505" 0.145119259217115 0.291134316330631 0.224525718361329 "ENSG00000118777/ENSG00000168079" 2
GO:0090049 "GO:0090049" "regulation of cell migration involved in sprouting angiogenesis" "2/160" "86/20505" 0.145119259217115 0.291134316330631 0.224525718361329 "ENSG00000128052/ENSG00000176692" 2
GO:0097192 "GO:0097192" "extrinsic apoptotic signaling pathway in absence of ligand" "2/160" "86/20505" 0.145119259217115 0.291134316330631 0.224525718361329 "ENSG00000165731/ENSG00000019549" 2
GO:0070661 "GO:0070661" "leukocyte proliferation" "5/160" "355/20505" 0.145276900611464 0.291250811712497 0.224615560773686 "ENSG00000164690/ENSG00000131203/ENSG00000110944/ENSG00000160712/ENSG00000154342" 5
GO:0003018 "GO:0003018" "vascular process in circulatory system" "3/160" "169/20505" 0.145926006069129 0.292351758734385 0.22546462221063 "ENSG00000148926/ENSG00000054598/ENSG00000183023" 3
GO:1903034 "GO:1903034" "regulation of response to wounding" "3/160" "170/20505" 0.147749947363509 0.294917690363196 0.22744349453831 "ENSG00000074660/ENSG00000176692/ENSG00000134853" 3
GO:0007260 "GO:0007260" "tyrosine phosphorylation of STAT protein" "2/160" "87/20505" 0.147811738144426 0.294917690363196 0.22744349453831 "ENSG00000110944/ENSG00000160712" 2
GO:0032651 "GO:0032651" "regulation of interleukin-1 beta production" "2/160" "87/20505" 0.147811738144426 0.294917690363196 0.22744349453831 "ENSG00000142405/ENSG00000114251" 2
GO:0032760 "GO:0032760" "positive regulation of tumor necrosis factor production" "2/160" "87/20505" 0.147811738144426 0.294917690363196 0.22744349453831 "ENSG00000110944/ENSG00000114251" 2
GO:0046031 "GO:0046031" "ADP metabolic process" "2/160" "87/20505" 0.147811738144426 0.294917690363196 0.22744349453831 "ENSG00000165140/ENSG00000009950" 2
GO:0050772 "GO:0050772" "positive regulation of axonogenesis" "2/160" "87/20505" 0.147811738144426 0.294917690363196 0.22744349453831 "ENSG00000154342/ENSG00000076356" 2
GO:0002548 "GO:0002548" "monocyte chemotaxis" "2/160" "88/20505" 0.150514447567972 0.297110611720935 0.229134697586312 "ENSG00000160712/ENSG00000006606" 2
GO:0046427 "GO:0046427" "positive regulation of JAK-STAT cascade" "2/160" "88/20505" 0.150514447567972 0.297110611720935 0.229134697586312 "ENSG00000110944/ENSG00000160712" 2
GO:0051155 "GO:0051155" "positive regulation of striated muscle cell differentiation" "2/160" "88/20505" 0.150514447567972 0.297110611720935 0.229134697586312 "ENSG00000164690/ENSG00000154342" 2
GO:0002645 "GO:0002645" "positive regulation of tolerance induction" "1/160" "21/20505" 0.151754958602078 0.297110611720935 0.229134697586312 "ENSG00000131203" 1
GO:0002664 "GO:0002664" "regulation of T cell tolerance induction" "1/160" "21/20505" 0.151754958602078 0.297110611720935 0.229134697586312 "ENSG00000131203" 1
GO:0007549 "GO:0007549" "dosage compensation" "1/160" "21/20505" 0.151754958602078 0.297110611720935 0.229134697586312 "ENSG00000147596" 1
GO:0007567 "GO:0007567" "parturition" "1/160" "21/20505" 0.151754958602078 0.297110611720935 0.229134697586312 "ENSG00000156574" 1
GO:0010715 "GO:0010715" "regulation of extracellular matrix disassembly" "1/160" "21/20505" 0.151754958602078 0.297110611720935 0.229134697586312 "ENSG00000162733" 1
GO:0016553 "GO:0016553" "base conversion or substitution editing" "1/160" "21/20505" 0.151754958602078 0.297110611720935 0.229134697586312 "ENSG00000163694" 1
GO:0021756 "GO:0021756" "striatum development" "1/160" "21/20505" 0.151754958602078 0.297110611720935 0.229134697586312 "ENSG00000184254" 1
GO:0031290 "GO:0031290" "retinal ganglion cell axon guidance" "1/160" "21/20505" 0.151754958602078 0.297110611720935 0.229134697586312 "ENSG00000187122" 1
GO:0042362 "GO:0042362" "fat-soluble vitamin biosynthetic process" "1/160" "21/20505" 0.151754958602078 0.297110611720935 0.229134697586312 "ENSG00000019549" 1
GO:0043302 "GO:0043302" "positive regulation of leukocyte degranulation" "1/160" "21/20505" 0.151754958602078 0.297110611720935 0.229134697586312 "ENSG00000204936" 1
GO:0045649 "GO:0045649" "regulation of macrophage differentiation" "1/160" "21/20505" 0.151754958602078 0.297110611720935 0.229134697586312 "ENSG00000157368" 1
GO:0045655 "GO:0045655" "regulation of monocyte differentiation" "1/160" "21/20505" 0.151754958602078 0.297110611720935 0.229134697586312 "ENSG00000157368" 1
GO:0048485 "GO:0048485" "sympathetic nervous system development" "1/160" "21/20505" 0.151754958602078 0.297110611720935 0.229134697586312 "ENSG00000165462" 1
GO:0048670 "GO:0048670" "regulation of collateral sprouting" "1/160" "21/20505" 0.151754958602078 0.297110611720935 0.229134697586312 "ENSG00000154342" 1
GO:0048745 "GO:0048745" "smooth muscle tissue development" "1/160" "21/20505" 0.151754958602078 0.297110611720935 0.229134697586312 "ENSG00000164690" 1
GO:0051900 "GO:0051900" "regulation of mitochondrial depolarization" "1/160" "21/20505" 0.151754958602078 0.297110611720935 0.229134697586312 "ENSG00000128052" 1
GO:0060039 "GO:0060039" "pericardium development" "1/160" "21/20505" 0.151754958602078 0.297110611720935 0.229134697586312 "ENSG00000114251" 1
GO:0060149 "GO:0060149" "negative regulation of posttranscriptional gene silencing" "1/160" "21/20505" 0.151754958602078 0.297110611720935 0.229134697586312 "ENSG00000256453" 1
GO:0060390 "GO:0060390" "regulation of SMAD protein signal transduction" "1/160" "21/20505" 0.151754958602078 0.297110611720935 0.229134697586312 "ENSG00000156574" 1
GO:0060487 "GO:0060487" "lung epithelial cell differentiation" "1/160" "21/20505" 0.151754958602078 0.297110611720935 0.229134697586312 "ENSG00000141448" 1
GO:0060575 "GO:0060575" "intestinal epithelial cell differentiation" "1/160" "21/20505" 0.151754958602078 0.297110611720935 0.229134697586312 "ENSG00000141448" 1
GO:0060967 "GO:0060967" "negative regulation of gene silencing by RNA" "1/160" "21/20505" 0.151754958602078 0.297110611720935 0.229134697586312 "ENSG00000256453" 1
GO:0072010 "GO:0072010" "glomerular epithelium development" "1/160" "21/20505" 0.151754958602078 0.297110611720935 0.229134697586312 "ENSG00000054598" 1
GO:0097503 "GO:0097503" "sialylation" "1/160" "21/20505" 0.151754958602078 0.297110611720935 0.229134697586312 "ENSG00000148488" 1
GO:1902003 "GO:1902003" "regulation of amyloid-beta formation" "1/160" "21/20505" 0.151754958602078 0.297110611720935 0.229134697586312 "ENSG00000262655" 1
GO:0060420 "GO:0060420" "regulation of heart growth" "2/160" "89/20505" 0.153227066891076 0.299792087395583 0.231202678646418 "ENSG00000141448/ENSG00000102678" 2
GO:0034329 "GO:0034329" "cell junction assembly" "4/160" "265/20505" 0.153482256943557 0.300090642753946 0.231432927547173 "ENSG00000128052/ENSG00000165215/ENSG00000019549/ENSG00000140937" 4
GO:1990138 "GO:1990138" "neuron projection extension" "3/160" "174/20505" 0.155119369988301 0.303088949375939 0.23374525182641 "ENSG00000154342/ENSG00000187122/ENSG00000114251" 3
GO:1903557 "GO:1903557" "positive regulation of tumor necrosis factor superfamily cytokine production" "2/160" "90/20505" 0.155949279839043 0.304377919412272 0.234739318506702 "ENSG00000110944/ENSG00000114251" 2
GO:0050804 "GO:0050804" "modulation of chemical synaptic transmission" "6/160" "465/20505" 0.156842444406192 0.304377919412272 0.234739318506702 "ENSG00000157680/ENSG00000124493/ENSG00000100678/ENSG00000154342/ENSG00000183454/ENSG00000140937" 6
GO:0035304 "GO:0035304" "regulation of protein dephosphorylation" "3/160" "175/20505" 0.156979649760741 0.304377919412272 0.234739318506702 "ENSG00000101445/ENSG00000156475/ENSG00000198729" 3
GO:0022412 "GO:0022412" "cellular process involved in reproduction in multicellular organism" "5/160" "365/20505" 0.157503664939633 0.304377919412272 0.234739318506702 "ENSG00000256453/ENSG00000147596/ENSG00000105146/ENSG00000102096/ENSG00000054598" 5
GO:0099177 "GO:0099177" "regulation of trans-synaptic signaling" "6/160" "466/20505" 0.157933189281095 0.304377919412272 0.234739318506702 "ENSG00000157680/ENSG00000124493/ENSG00000100678/ENSG00000154342/ENSG00000183454/ENSG00000140937" 6
GO:0002052 "GO:0002052" "positive regulation of neuroblast proliferation" "1/160" "22/20505" 0.158380578921531 0.304377919412272 0.234739318506702 "ENSG00000164690" 1
GO:0002082 "GO:0002082" "regulation of oxidative phosphorylation" "1/160" "22/20505" 0.158380578921531 0.304377919412272 0.234739318506702 "ENSG00000009950" 1
GO:0003180 "GO:0003180" "aortic valve morphogenesis" "1/160" "22/20505" 0.158380578921531 0.304377919412272 0.234739318506702 "ENSG00000019549" 1
GO:0006144 "GO:0006144" "purine nucleobase metabolic process" "1/160" "22/20505" 0.158380578921531 0.304377919412272 0.234739318506702 "ENSG00000137198" 1
GO:0021513 "GO:0021513" "spinal cord dorsal/ventral patterning" "1/160" "22/20505" 0.158380578921531 0.304377919412272 0.234739318506702 "ENSG00000164690" 1
GO:0032373 "GO:0032373" "positive regulation of sterol transport" "1/160" "22/20505" 0.158380578921531 0.304377919412272 0.234739318506702 "ENSG00000160179" 1
GO:0032376 "GO:0032376" "positive regulation of cholesterol transport" "1/160" "22/20505" 0.158380578921531 0.304377919412272 0.234739318506702 "ENSG00000160179" 1
GO:0035162 "GO:0035162" "embryonic hemopoiesis" "1/160" "22/20505" 0.158380578921531 0.304377919412272 0.234739318506702 "ENSG00000128052" 1
GO:0042402 "GO:0042402" "cellular biogenic amine catabolic process" "1/160" "22/20505" 0.158380578921531 0.304377919412272 0.234739318506702 "ENSG00000131203" 1
GO:0045061 "GO:0045061" "thymic T cell selection" "1/160" "22/20505" 0.158380578921531 0.304377919412272 0.234739318506702 "ENSG00000164690" 1
GO:0045624 "GO:0045624" "positive regulation of T-helper cell differentiation" "1/160" "22/20505" 0.158380578921531 0.304377919412272 0.234739318506702 "ENSG00000110944" 1
GO:0060479 "GO:0060479" "lung cell differentiation" "1/160" "22/20505" 0.158380578921531 0.304377919412272 0.234739318506702 "ENSG00000141448" 1
GO:0070233 "GO:0070233" "negative regulation of T cell apoptotic process" "1/160" "22/20505" 0.158380578921531 0.304377919412272 0.234739318506702 "ENSG00000131203" 1
GO:0071425 "GO:0071425" "hematopoietic stem cell proliferation" "1/160" "22/20505" 0.158380578921531 0.304377919412272 0.234739318506702 "ENSG00000114251" 1
GO:0072012 "GO:0072012" "glomerulus vasculature development" "1/160" "22/20505" 0.158380578921531 0.304377919412272 0.234739318506702 "ENSG00000134853" 1
GO:0090190 "GO:0090190" "positive regulation of branching involved in ureteric bud morphogenesis" "1/160" "22/20505" 0.158380578921531 0.304377919412272 0.234739318506702 "ENSG00000273706" 1
GO:1900273 "GO:1900273" "positive regulation of long-term synaptic potentiation" "1/160" "22/20505" 0.158380578921531 0.304377919412272 0.234739318506702 "ENSG00000183454" 1
GO:1904886 "GO:1904886" "beta-catenin destruction complex disassembly" "1/160" "22/20505" 0.158380578921531 0.304377919412272 0.234739318506702 "ENSG00000154342" 1
GO:2000178 "GO:2000178" "negative regulation of neural precursor cell proliferation" "1/160" "22/20505" 0.158380578921531 0.304377919412272 0.234739318506702 "ENSG00000114251" 1
GO:2000316 "GO:2000316" "regulation of T-helper 17 type immune response" "1/160" "22/20505" 0.158380578921531 0.304377919412272 0.234739318506702 "ENSG00000110944" 1
GO:1904894 "GO:1904894" "positive regulation of STAT cascade" "2/160" "91/20505" 0.158680774411951 0.304754606142454 0.235029823108692 "ENSG00000110944/ENSG00000160712" 2
GO:0009101 "GO:0009101" "glycoprotein biosynthetic process" "5/160" "367/20505" 0.15999894657641 0.307084592346455 0.236826731947262 "ENSG00000182050/ENSG00000156966/ENSG00000100060/ENSG00000176928/ENSG00000148488" 5
GO:0036294 "GO:0036294" "cellular response to decreased oxygen levels" "3/160" "177/20505" 0.160721033289904 0.308268211392111 0.237739550881977 "ENSG00000141448/ENSG00000100678/ENSG00000183023" 3
GO:1901617 "GO:1901617" "organic hydroxy compound biosynthetic process" "4/160" "270/20505" 0.160839878006266 0.308293999454999 0.237759438895929 "ENSG00000160179/ENSG00000019549/ENSG00000125931/ENSG00000114251" 4
GO:0035308 "GO:0035308" "negative regulation of protein dephosphorylation" "2/160" "92/20505" 0.161421242837903 0.309205720563763 0.238462567401941 "ENSG00000101445/ENSG00000198729" 2
GO:0001558 "GO:0001558" "regulation of cell growth" "6/160" "470/20505" 0.162329581490196 0.309488579426483 0.238680711007091 "ENSG00000164736/ENSG00000158825/ENSG00000165140/ENSG00000104415/ENSG00000154342/ENSG00000114251" 6
GO:0090132 "GO:0090132" "epithelium migration" "5/160" "369/20505" 0.16251041178982 0.309488579426483 0.238680711007091 "ENSG00000128052/ENSG00000126561/ENSG00000176692/ENSG00000107831/ENSG00000114251" 5
GO:0007187 "GO:0007187" "G protein-coupled receptor signaling pathway, coupled to cyclic nucleotide second messenger" "4/160" "272/20505" 0.163818922235642 0.309488579426483 0.238680711007091 "ENSG00000173698/ENSG00000139874/ENSG00000148926/ENSG00000124493" 4
GO:0001843 "GO:0001843" "neural tube closure" "2/160" "93/20505" 0.164170381526739 0.309488579426483 0.238680711007091 "ENSG00000148926/ENSG00000114251" 2
GO:0003073 "GO:0003073" "regulation of systemic arterial blood pressure" "2/160" "93/20505" 0.164170381526739 0.309488579426483 0.238680711007091 "ENSG00000145536/ENSG00000148926" 2
GO:0010717 "GO:0010717" "regulation of epithelial to mesenchymal transition" "2/160" "93/20505" 0.164170381526739 0.309488579426483 0.238680711007091 "ENSG00000054598/ENSG00000168675" 2
GO:0060291 "GO:0060291" "long-term synaptic potentiation" "2/160" "93/20505" 0.164170381526739 0.309488579426483 0.238680711007091 "ENSG00000100678/ENSG00000183454" 2
GO:1900542 "GO:1900542" "regulation of purine nucleotide metabolic process" "2/160" "93/20505" 0.164170381526739 0.309488579426483 0.238680711007091 "ENSG00000165140/ENSG00000009950" 2
GO:0001779 "GO:0001779" "natural killer cell differentiation" "1/160" "23/20505" 0.164954767632782 0.309488579426483 0.238680711007091 "ENSG00000198846" 1
GO:0002021 "GO:0002021" "response to dietary excess" "1/160" "23/20505" 0.164954767632782 0.309488579426483 0.238680711007091 "ENSG00000184344" 1
GO:0002517 "GO:0002517" "T cell tolerance induction" "1/160" "23/20505" 0.164954767632782 0.309488579426483 0.238680711007091 "ENSG00000131203" 1
GO:0002676 "GO:0002676" "regulation of chronic inflammatory response" "1/160" "23/20505" 0.164954767632782 0.309488579426483 0.238680711007091 "ENSG00000131203" 1
GO:0003433 "GO:0003433" "chondrocyte development involved in endochondral bone morphogenesis" "1/160" "23/20505" 0.164954767632782 0.309488579426483 0.238680711007091 "ENSG00000165816" 1
GO:0010881 "GO:0010881" "regulation of cardiac muscle contraction by regulation of the release of sequestered calcium ion" "1/160" "23/20505" 0.164954767632782 0.309488579426483 0.238680711007091 "ENSG00000183023" 1
GO:0014829 "GO:0014829" "vascular smooth muscle contraction" "1/160" "23/20505" 0.164954767632782 0.309488579426483 0.238680711007091 "ENSG00000183023" 1
GO:0021854 "GO:0021854" "hypothalamus development" "1/160" "23/20505" 0.164954767632782 0.309488579426483 0.238680711007091 "ENSG00000169297" 1
GO:0021895 "GO:0021895" "cerebral cortex neuron differentiation" "1/160" "23/20505" 0.164954767632782 0.309488579426483 0.238680711007091 "ENSG00000163508" 1
GO:0032928 "GO:0032928" "regulation of superoxide anion generation" "1/160" "23/20505" 0.164954767632782 0.309488579426483 0.238680711007091 "ENSG00000204936" 1
GO:0033139 "GO:0033139" "regulation of peptidyl-serine phosphorylation of STAT protein" "1/160" "23/20505" 0.164954767632782 0.309488579426483 0.238680711007091 "ENSG00000165731" 1
GO:0033561 "GO:0033561" "regulation of water loss via skin" "1/160" "23/20505" 0.164954767632782 0.309488579426483 0.238680711007091 "ENSG00000179148" 1
GO:0034375 "GO:0034375" "high-density lipoprotein particle remodeling" "1/160" "23/20505" 0.164954767632782 0.309488579426483 0.238680711007091 "ENSG00000160179" 1
GO:0035357 "GO:0035357" "peroxisome proliferator activated receptor signaling pathway" "1/160" "23/20505" 0.164954767632782 0.309488579426483 0.238680711007091 "ENSG00000179148" 1
GO:0042454 "GO:0042454" "ribonucleoside catabolic process" "1/160" "23/20505" 0.164954767632782 0.309488579426483 0.238680711007091 "ENSG00000158825" 1
GO:0045109 "GO:0045109" "intermediate filament organization" "1/160" "23/20505" 0.164954767632782 0.309488579426483 0.238680711007091 "ENSG00000164690" 1
GO:0045606 "GO:0045606" "positive regulation of epidermal cell differentiation" "1/160" "23/20505" 0.164954767632782 0.309488579426483 0.238680711007091 "ENSG00000054598" 1
GO:0048026 "GO:0048026" "positive regulation of mRNA splicing, via spliceosome" "1/160" "23/20505" 0.164954767632782 0.309488579426483 0.238680711007091 "ENSG00000188816" 1
GO:0051195 "GO:0051195" "negative regulation of cofactor metabolic process" "1/160" "23/20505" 0.164954767632782 0.309488579426483 0.238680711007091 "ENSG00000165140" 1
GO:0060231 "GO:0060231" "mesenchymal to epithelial transition" "1/160" "23/20505" 0.164954767632782 0.309488579426483 0.238680711007091 "ENSG00000125931" 1
GO:0060396 "GO:0060396" "growth hormone receptor signaling pathway" "1/160" "23/20505" 0.164954767632782 0.309488579426483 0.238680711007091 "ENSG00000126561" 1
GO:0090023 "GO:0090023" "positive regulation of neutrophil chemotaxis" "1/160" "23/20505" 0.164954767632782 0.309488579426483 0.238680711007091 "ENSG00000110944" 1
GO:1904467 "GO:1904467" "regulation of tumor necrosis factor secretion" "1/160" "23/20505" 0.164954767632782 0.309488579426483 0.238680711007091 "ENSG00000114251" 1
GO:2000726 "GO:2000726" "negative regulation of cardiac muscle cell differentiation" "1/160" "23/20505" 0.164954767632782 0.309488579426483 0.238680711007091 "ENSG00000198719" 1
GO:0045807 "GO:0045807" "positive regulation of endocytosis" "3/160" "180/20505" 0.166383705462155 0.311969447741541 0.240593981650067 "ENSG00000198719/ENSG00000154342/ENSG00000114251" 3
GO:0006165 "GO:0006165" "nucleoside diphosphate phosphorylation" "2/160" "94/20505" 0.166927891024211 0.312389047502123 0.240917581213513 "ENSG00000165140/ENSG00000009950" 2
GO:0060606 "GO:0060606" "tube closure" "2/160" "94/20505" 0.166927891024211 0.312389047502123 0.240917581213513 "ENSG00000148926/ENSG00000114251" 2
GO:0061097 "GO:0061097" "regulation of protein tyrosine kinase activity" "2/160" "94/20505" 0.166927891024211 0.312389047502123 0.240917581213513 "ENSG00000163235/ENSG00000154342" 2
GO:0032755 "GO:0032755" "positive regulation of interleukin-6 production" "2/160" "95/20505" 0.169693475966612 0.313679124665684 0.24191250172148 "ENSG00000160712/ENSG00000114251" 2
GO:0032945 "GO:0032945" "negative regulation of mononuclear cell proliferation" "2/160" "95/20505" 0.169693475966612 0.313679124665684 0.24191250172148 "ENSG00000164690/ENSG00000131203" 2
GO:0050672 "GO:0050672" "negative regulation of lymphocyte proliferation" "2/160" "95/20505" 0.169693475966612 0.313679124665684 0.24191250172148 "ENSG00000164690/ENSG00000131203" 2
GO:0016525 "GO:0016525" "negative regulation of angiogenesis" "3/160" "182/20505" 0.170191417076885 0.313679124665684 0.24191250172148 "ENSG00000152804/ENSG00000186340/ENSG00000054598" 3
GO:0003418 "GO:0003418" "growth plate cartilage chondrocyte differentiation" "1/160" "24/20505" 0.171477921483908 0.313679124665684 0.24191250172148 "ENSG00000165816" 1
GO:0006851 "GO:0006851" "mitochondrial calcium ion transmembrane transport" "1/160" "24/20505" 0.171477921483908 0.313679124665684 0.24191250172148 "ENSG00000100678" 1
GO:0009081 "GO:0009081" "branched-chain amino acid metabolic process" "1/160" "24/20505" 0.171477921483908 0.313679124665684 0.24191250172148 "ENSG00000126561" 1
GO:0009310 "GO:0009310" "amine catabolic process" "1/160" "24/20505" 0.171477921483908 0.313679124665684 0.24191250172148 "ENSG00000131203" 1
GO:0016338 "GO:0016338" "calcium-independent cell-cell adhesion via plasma membrane cell-adhesion molecules" "1/160" "24/20505" 0.171477921483908 0.313679124665684 0.24191250172148 "ENSG00000165215" 1
GO:0021511 "GO:0021511" "spinal cord patterning" "1/160" "24/20505" 0.171477921483908 0.313679124665684 0.24191250172148 "ENSG00000164690" 1
GO:0030318 "GO:0030318" "melanocyte differentiation" "1/160" "24/20505" 0.171477921483908 0.313679124665684 0.24191250172148 "ENSG00000125931" 1
GO:0032104 "GO:0032104" "regulation of response to extracellular stimulus" "1/160" "24/20505" 0.171477921483908 0.313679124665684 0.24191250172148 "ENSG00000019549" 1
GO:0032107 "GO:0032107" "regulation of response to nutrient levels" "1/160" "24/20505" 0.171477921483908 0.313679124665684 0.24191250172148 "ENSG00000019549" 1
GO:0032331 "GO:0032331" "negative regulation of chondrocyte differentiation" "1/160" "24/20505" 0.171477921483908 0.313679124665684 0.24191250172148 "ENSG00000019549" 1
GO:0033081 "GO:0033081" "regulation of T cell differentiation in thymus" "1/160" "24/20505" 0.171477921483908 0.313679124665684 0.24191250172148 "ENSG00000164690" 1
GO:0035809 "GO:0035809" "regulation of urine volume" "1/160" "24/20505" 0.171477921483908 0.313679124665684 0.24191250172148 "ENSG00000148926" 1
GO:0043576 "GO:0043576" "regulation of respiratory gaseous exchange" "1/160" "24/20505" 0.171477921483908 0.313679124665684 0.24191250172148 "ENSG00000165462" 1
GO:0046639 "GO:0046639" "negative regulation of alpha-beta T cell differentiation" "1/160" "24/20505" 0.171477921483908 0.313679124665684 0.24191250172148 "ENSG00000164690" 1
GO:0048103 "GO:0048103" "somatic stem cell division" "1/160" "24/20505" 0.171477921483908 0.313679124665684 0.24191250172148 "ENSG00000154342" 1
GO:0048520 "GO:0048520" "positive regulation of behavior" "1/160" "24/20505" 0.171477921483908 0.313679124665684 0.24191250172148 "ENSG00000181195" 1
GO:0051647 "GO:0051647" "nucleus localization" "1/160" "24/20505" 0.171477921483908 0.313679124665684 0.24191250172148 "ENSG00000187122" 1
GO:0051882 "GO:0051882" "mitochondrial depolarization" "1/160" "24/20505" 0.171477921483908 0.313679124665684 0.24191250172148 "ENSG00000128052" 1
GO:0060055 "GO:0060055" "angiogenesis involved in wound healing" "1/160" "24/20505" 0.171477921483908 0.313679124665684 0.24191250172148 "ENSG00000176692" 1
GO:0060749 "GO:0060749" "mammary gland alveolus development" "1/160" "24/20505" 0.171477921483908 0.313679124665684 0.24191250172148 "ENSG00000103241" 1
GO:0061377 "GO:0061377" "mammary gland lobule development" "1/160" "24/20505" 0.171477921483908 0.313679124665684 0.24191250172148 "ENSG00000103241" 1
GO:0061437 "GO:0061437" "renal system vasculature development" "1/160" "24/20505" 0.171477921483908 0.313679124665684 0.24191250172148 "ENSG00000134853" 1
GO:0061440 "GO:0061440" "kidney vasculature development" "1/160" "24/20505" 0.171477921483908 0.313679124665684 0.24191250172148 "ENSG00000134853" 1
GO:0071157 "GO:0071157" "negative regulation of cell cycle arrest" "1/160" "24/20505" 0.171477921483908 0.313679124665684 0.24191250172148 "ENSG00000009950" 1
GO:0071378 "GO:0071378" "cellular response to growth hormone stimulus" "1/160" "24/20505" 0.171477921483908 0.313679124665684 0.24191250172148 "ENSG00000126561" 1
GO:0086012 "GO:0086012" "membrane depolarization during cardiac muscle cell action potential" "1/160" "24/20505" 0.171477921483908 0.313679124665684 0.24191250172148 "ENSG00000183023" 1
GO:1900746 "GO:1900746" "regulation of vascular endothelial growth factor signaling pathway" "1/160" "24/20505" 0.171477921483908 0.313679124665684 0.24191250172148 "ENSG00000198719" 1
GO:1902473 "GO:1902473" "regulation of protein localization to synapse" "1/160" "24/20505" 0.171477921483908 0.313679124665684 0.24191250172148 "ENSG00000114251" 1
GO:1990774 "GO:1990774" "tumor necrosis factor secretion" "1/160" "24/20505" 0.171477921483908 0.313679124665684 0.24191250172148 "ENSG00000114251" 1
GO:2000209 "GO:2000209" "regulation of anoikis" "1/160" "24/20505" 0.171477921483908 0.313679124665684 0.24191250172148 "ENSG00000019549" 1
GO:2000291 "GO:2000291" "regulation of myoblast proliferation" "1/160" "24/20505" 0.171477921483908 0.313679124665684 0.24191250172148 "ENSG00000141448" 1
GO:2001026 "GO:2001026" "regulation of endothelial cell chemotaxis" "1/160" "24/20505" 0.171477921483908 0.313679124665684 0.24191250172148 "ENSG00000128052" 1
GO:0008217 "GO:0008217" "regulation of blood pressure" "3/160" "183/20505" 0.172104761249722 0.314629016659648 0.242645067998786 "ENSG00000145536/ENSG00000148926/ENSG00000198719" 3
GO:0032611 "GO:0032611" "interleukin-1 beta production" "2/160" "96/20505" 0.172466845035842 0.314897329419375 0.242851993502733 "ENSG00000142405/ENSG00000114251" 2
GO:0046939 "GO:0046939" "nucleotide phosphorylation" "2/160" "96/20505" 0.172466845035842 0.314897329419375 0.242851993502733 "ENSG00000165140/ENSG00000009950" 2
GO:0043405 "GO:0043405" "regulation of MAP kinase activity" "5/160" "377/20505" 0.172714063916047 0.3151519881188 0.243048388857791 "ENSG00000165731/ENSG00000124493/ENSG00000121966/ENSG00000163235/ENSG00000114251" 5
GO:2000181 "GO:2000181" "negative regulation of blood vessel morphogenesis" "3/160" "184/20505" 0.174024302247362 0.31734481550719 0.244739519435685 "ENSG00000152804/ENSG00000186340/ENSG00000054598" 3
GO:0006942 "GO:0006942" "regulation of striated muscle contraction" "2/160" "97/20505" 0.175247710914938 0.318309710552434 0.245483656217316 "ENSG00000100678/ENSG00000183023" 2
GO:0030516 "GO:0030516" "regulation of axon extension" "2/160" "97/20505" 0.175247710914938 0.318309710552434 0.245483656217316 "ENSG00000154342/ENSG00000114251" 2
GO:0031345 "GO:0031345" "negative regulation of cell projection organization" "3/160" "185/20505" 0.175949943761624 0.318309710552434 0.245483656217316 "ENSG00000149922/ENSG00000154342/ENSG00000114251" 3
GO:0032868 "GO:0032868" "response to insulin" "4/160" "281/20505" 0.177467267621306 0.318309710552434 0.245483656217316 "ENSG00000148926/ENSG00000176692/ENSG00000165816/ENSG00000125931" 4
GO:0048015 "GO:0048015" "phosphatidylinositol-mediated signaling" "3/160" "186/20505" 0.177881589700544 0.318309710552434 0.245483656217316 "ENSG00000101445/ENSG00000128052/ENSG00000134853" 3
GO:0006066 "GO:0006066" "alcohol metabolic process" "5/160" "381/20505" 0.177907684081671 0.318309710552434 0.245483656217316 "ENSG00000184254/ENSG00000121207/ENSG00000074660/ENSG00000160179/ENSG00000128918" 5
GO:0002407 "GO:0002407" "dendritic cell chemotaxis" "1/160" "25/20505" 0.177950434181655 0.318309710552434 0.245483656217316 "ENSG00000121966" 1
GO:0003176 "GO:0003176" "aortic valve development" "1/160" "25/20505" 0.177950434181655 0.318309710552434 0.245483656217316 "ENSG00000019549" 1
GO:0006700 "GO:0006700" "C21-steroid hormone biosynthetic process" "1/160" "25/20505" 0.177950434181655 0.318309710552434 0.245483656217316 "ENSG00000148926" 1
GO:0009190 "GO:0009190" "cyclic nucleotide biosynthetic process" "1/160" "25/20505" 0.177950434181655 0.318309710552434 0.245483656217316 "ENSG00000148926" 1
GO:0010226 "GO:0010226" "response to lithium ion" "1/160" "25/20505" 0.177950434181655 0.318309710552434 0.245483656217316 "ENSG00000164690" 1
GO:0021952 "GO:0021952" "central nervous system projection neuron axonogenesis" "1/160" "25/20505" 0.177950434181655 0.318309710552434 0.245483656217316 "ENSG00000140937" 1
GO:0031069 "GO:0031069" "hair follicle morphogenesis" "1/160" "25/20505" 0.177950434181655 0.318309710552434 0.245483656217316 "ENSG00000164690" 1
GO:0032366 "GO:0032366" "intracellular sterol transport" "1/160" "25/20505" 0.177950434181655 0.318309710552434 0.245483656217316 "ENSG00000160179" 1
GO:0032367 "GO:0032367" "intracellular cholesterol transport" "1/160" "25/20505" 0.177950434181655 0.318309710552434 0.245483656217316 "ENSG00000160179" 1
GO:0034505 "GO:0034505" "tooth mineralization" "1/160" "25/20505" 0.177950434181655 0.318309710552434 0.245483656217316 "ENSG00000177706" 1
GO:0035584 "GO:0035584" "calcium-mediated signaling using intracellular calcium source" "1/160" "25/20505" 0.177950434181655 0.318309710552434 0.245483656217316 "ENSG00000128052" 1
GO:0035640 "GO:0035640" "exploration behavior" "1/160" "25/20505" 0.177950434181655 0.318309710552434 0.245483656217316 "ENSG00000181195" 1
GO:0042537 "GO:0042537" "benzene-containing compound metabolic process" "1/160" "25/20505" 0.177950434181655 0.318309710552434 0.245483656217316 "ENSG00000131203" 1
GO:0046135 "GO:0046135" "pyrimidine nucleoside catabolic process" "1/160" "25/20505" 0.177950434181655 0.318309710552434 0.245483656217316 "ENSG00000158825" 1
GO:0050711 "GO:0050711" "negative regulation of interleukin-1 secretion" "1/160" "25/20505" 0.177950434181655 0.318309710552434 0.245483656217316 "ENSG00000142405" 1
GO:0051194 "GO:0051194" "positive regulation of cofactor metabolic process" "1/160" "25/20505" 0.177950434181655 0.318309710552434 0.245483656217316 "ENSG00000009950" 1
GO:0051446 "GO:0051446" "positive regulation of meiotic cell cycle" "1/160" "25/20505" 0.177950434181655 0.318309710552434 0.245483656217316 "ENSG00000114251" 1
GO:0051642 "GO:0051642" "centrosome localization" "1/160" "25/20505" 0.177950434181655 0.318309710552434 0.245483656217316 "ENSG00000076356" 1
GO:0052652 "GO:0052652" "cyclic purine nucleotide metabolic process" "1/160" "25/20505" 0.177950434181655 0.318309710552434 0.245483656217316 "ENSG00000148926" 1
GO:0061213 "GO:0061213" "positive regulation of mesonephros development" "1/160" "25/20505" 0.177950434181655 0.318309710552434 0.245483656217316 "ENSG00000273706" 1
GO:0071624 "GO:0071624" "positive regulation of granulocyte chemotaxis" "1/160" "25/20505" 0.177950434181655 0.318309710552434 0.245483656217316 "ENSG00000110944" 1
GO:0086064 "GO:0086064" "cell communication by electrical coupling involved in cardiac conduction" "1/160" "25/20505" 0.177950434181655 0.318309710552434 0.245483656217316 "ENSG00000183023" 1
GO:0097150 "GO:0097150" "neuronal stem cell population maintenance" "1/160" "25/20505" 0.177950434181655 0.318309710552434 0.245483656217316 "ENSG00000198719" 1
GO:1903306 "GO:1903306" "negative regulation of regulated secretory pathway" "1/160" "25/20505" 0.177950434181655 0.318309710552434 0.245483656217316 "ENSG00000103241" 1
GO:1904754 "GO:1904754" "positive regulation of vascular associated smooth muscle cell migration" "1/160" "25/20505" 0.177950434181655 0.318309710552434 0.245483656217316 "ENSG00000102678" 1
GO:2000106 "GO:2000106" "regulation of leukocyte apoptotic process" "2/160" "98/20505" 0.178035790244028 0.318309710552434 0.245483656217316 "ENSG00000131203/ENSG00000114251" 2
GO:0008361 "GO:0008361" "regulation of cell size" "3/160" "187/20505" 0.179819144197678 0.321301769565185 0.247791162277352 "ENSG00000165731/ENSG00000154342/ENSG00000114251" 3
GO:0032496 "GO:0032496" "response to lipopolysaccharide" "5/160" "383/20505" 0.180526711011674 0.322321816247372 0.248577832557128 "ENSG00000131203/ENSG00000148926/ENSG00000181195/ENSG00000125931/ENSG00000114251" 5
GO:0008585 "GO:0008585" "female gonad development" "2/160" "99/20505" 0.180830803576731 0.322321816247372 0.248577832557128 "ENSG00000054598/ENSG00000134853" 2
GO:0045582 "GO:0045582" "positive regulation of T cell differentiation" "2/160" "99/20505" 0.180830803576731 0.322321816247372 0.248577832557128 "ENSG00000164690/ENSG00000110944" 2
GO:0055013 "GO:0055013" "cardiac muscle cell development" "2/160" "99/20505" 0.180830803576731 0.322321816247372 0.248577832557128 "ENSG00000183023/ENSG00000134853" 2
GO:0034404 "GO:0034404" "nucleobase-containing small molecule biosynthetic process" "3/160" "188/20505" 0.181762511621191 0.322928225756129 0.24904550168075 "ENSG00000158825/ENSG00000165140/ENSG00000009950" 3
GO:0043542 "GO:0043542" "endothelial cell migration" "4/160" "284/20505" 0.18210112577191 0.322928225756129 0.24904550168075 "ENSG00000128052/ENSG00000126561/ENSG00000176692/ENSG00000114251" 4
GO:0009135 "GO:0009135" "purine nucleoside diphosphate metabolic process" "2/160" "100/20505" 0.183632475336985 0.322928225756129 0.24904550168075 "ENSG00000165140/ENSG00000009950" 2
GO:0009179 "GO:0009179" "purine ribonucleoside diphosphate metabolic process" "2/160" "100/20505" 0.183632475336985 0.322928225756129 0.24904550168075 "ENSG00000165140/ENSG00000009950" 2
GO:0035249 "GO:0035249" "synaptic transmission, glutamatergic" "2/160" "100/20505" 0.183632475336985 0.322928225756129 0.24904550168075 "ENSG00000157680/ENSG00000124493" 2
GO:0007249 "GO:0007249" "I-kappaB kinase/NF-kappaB signaling" "4/160" "285/20505" 0.183654726631534 0.322928225756129 0.24904550168075 "ENSG00000142405/ENSG00000102096/ENSG00000135960/ENSG00000114251" 4
GO:0072522 "GO:0072522" "purine-containing compound biosynthetic process" "4/160" "285/20505" 0.183654726631534 0.322928225756129 0.24904550168075 "ENSG00000165140/ENSG00000148926/ENSG00000009950/ENSG00000137198" 4
GO:0045619 "GO:0045619" "regulation of lymphocyte differentiation" "3/160" "189/20505" 0.183711596582752 0.322928225756129 0.24904550168075 "ENSG00000164690/ENSG00000110944/ENSG00000198846" 3
GO:0048017 "GO:0048017" "inositol lipid-mediated signaling" "3/160" "189/20505" 0.183711596582752 0.322928225756129 0.24904550168075 "ENSG00000101445/ENSG00000128052/ENSG00000134853" 3
GO:0001958 "GO:0001958" "endochondral ossification" "1/160" "26/20505" 0.184372696414611 0.322928225756129 0.24904550168075 "ENSG00000054598" 1
GO:0010460 "GO:0010460" "positive regulation of heart rate" "1/160" "26/20505" 0.184372696414611 0.322928225756129 0.24904550168075 "ENSG00000148926" 1
GO:0010888 "GO:0010888" "negative regulation of lipid storage" "1/160" "26/20505" 0.184372696414611 0.322928225756129 0.24904550168075 "ENSG00000160179" 1
GO:0035235 "GO:0035235" "ionotropic glutamate receptor signaling pathway" "1/160" "26/20505" 0.184372696414611 0.322928225756129 0.24904550168075 "ENSG00000183454" 1
GO:0036035 "GO:0036035" "osteoclast development" "1/160" "26/20505" 0.184372696414611 0.322928225756129 0.24904550168075 "ENSG00000177706" 1
GO:0036075 "GO:0036075" "replacement ossification" "1/160" "26/20505" 0.184372696414611 0.322928225756129 0.24904550168075 "ENSG00000054598" 1
GO:0043691 "GO:0043691" "reverse cholesterol transport" "1/160" "26/20505" 0.184372696414611 0.322928225756129 0.24904550168075 "ENSG00000160179" 1
GO:0046641 "GO:0046641" "positive regulation of alpha-beta T cell proliferation" "1/160" "26/20505" 0.184372696414611 0.322928225756129 0.24904550168075 "ENSG00000110944" 1
GO:0048679 "GO:0048679" "regulation of axon regeneration" "1/160" "26/20505" 0.184372696414611 0.322928225756129 0.24904550168075 "ENSG00000074660" 1
GO:0051560 "GO:0051560" "mitochondrial calcium ion homeostasis" "1/160" "26/20505" 0.184372696414611 0.322928225756129 0.24904550168075 "ENSG00000100678" 1
GO:0051894 "GO:0051894" "positive regulation of focal adhesion assembly" "1/160" "26/20505" 0.184372696414611 0.322928225756129 0.24904550168075 "ENSG00000128052" 1
GO:0060561 "GO:0060561" "apoptotic process involved in morphogenesis" "1/160" "26/20505" 0.184372696414611 0.322928225756129 0.24904550168075 "ENSG00000054598" 1
GO:0060706 "GO:0060706" "cell differentiation involved in embryonic placenta development" "1/160" "26/20505" 0.184372696414611 0.322928225756129 0.24904550168075 "ENSG00000163508" 1
GO:0061842 "GO:0061842" "microtubule organizing center localization" "1/160" "26/20505" 0.184372696414611 0.322928225756129 0.24904550168075 "ENSG00000076356" 1
GO:0072539 "GO:0072539" "T-helper 17 cell differentiation" "1/160" "26/20505" 0.184372696414611 0.322928225756129 0.24904550168075 "ENSG00000110944" 1
GO:1900452 "GO:1900452" "regulation of long-term synaptic depression" "1/160" "26/20505" 0.184372696414611 0.322928225756129 0.24904550168075 "ENSG00000157680" 1
GO:1902547 "GO:1902547" "regulation of cellular response to vascular endothelial growth factor stimulus" "1/160" "26/20505" 0.184372696414611 0.322928225756129 0.24904550168075 "ENSG00000198719" 1
GO:1902624 "GO:1902624" "positive regulation of neutrophil migration" "1/160" "26/20505" 0.184372696414611 0.322928225756129 0.24904550168075 "ENSG00000110944" 1
GO:1902991 "GO:1902991" "regulation of amyloid precursor protein catabolic process" "1/160" "26/20505" 0.184372696414611 0.322928225756129 0.24904550168075 "ENSG00000262655" 1
GO:2000482 "GO:2000482" "regulation of interleukin-8 secretion" "1/160" "26/20505" 0.184372696414611 0.322928225756129 0.24904550168075 "ENSG00000114251" 1
GO:0032652 "GO:0032652" "regulation of interleukin-1 production" "2/160" "101/20505" 0.18644053377631 0.326159426612264 0.25153743634011 "ENSG00000142405/ENSG00000114251" 2
GO:0050810 "GO:0050810" "regulation of steroid biosynthetic process" "2/160" "101/20505" 0.18644053377631 0.326159426612264 0.25153743634011 "ENSG00000160179/ENSG00000019549" 2
GO:0055001 "GO:0055001" "muscle cell development" "3/160" "191/20505" 0.18762653883612 0.328038031139063 0.252986235080886 "ENSG00000148926/ENSG00000183023/ENSG00000134853" 3
GO:0009185 "GO:0009185" "ribonucleoside diphosphate metabolic process" "2/160" "102/20505" 0.189254710931484 0.32994051179057 0.254453447329624 "ENSG00000165140/ENSG00000009950" 2
GO:0070664 "GO:0070664" "negative regulation of leukocyte proliferation" "2/160" "102/20505" 0.189254710931484 0.32994051179057 0.254453447329624 "ENSG00000164690/ENSG00000131203" 2
GO:0002092 "GO:0002092" "positive regulation of receptor internalization" "1/160" "27/20505" 0.190745095876189 0.32994051179057 0.254453447329624 "ENSG00000154342" 1
GO:0007176 "GO:0007176" "regulation of epidermal growth factor-activated receptor activity" "1/160" "27/20505" 0.190745095876189 0.32994051179057 0.254453447329624 "ENSG00000163235" 1
GO:0010893 "GO:0010893" "positive regulation of steroid biosynthetic process" "1/160" "27/20505" 0.190745095876189 0.32994051179057 0.254453447329624 "ENSG00000160179" 1
GO:0010954 "GO:0010954" "positive regulation of protein processing" "1/160" "27/20505" 0.190745095876189 0.32994051179057 0.254453447329624 "ENSG00000262655" 1
GO:0032660 "GO:0032660" "regulation of interleukin-17 production" "1/160" "27/20505" 0.190745095876189 0.32994051179057 0.254453447329624 "ENSG00000110944" 1
GO:0033137 "GO:0033137" "negative regulation of peptidyl-serine phosphorylation" "1/160" "27/20505" 0.190745095876189 0.32994051179057 0.254453447329624 "ENSG00000009950" 1
GO:0034205 "GO:0034205" "amyloid-beta formation" "1/160" "27/20505" 0.190745095876189 0.32994051179057 0.254453447329624 "ENSG00000262655" 1
GO:0042501 "GO:0042501" "serine phosphorylation of STAT protein" "1/160" "27/20505" 0.190745095876189 0.32994051179057 0.254453447329624 "ENSG00000165731" 1
GO:0043951 "GO:0043951" "negative regulation of cAMP-mediated signaling" "1/160" "27/20505" 0.190745095876189 0.32994051179057 0.254453447329624 "ENSG00000134817" 1
GO:0044030 "GO:0044030" "regulation of DNA methylation" "1/160" "27/20505" 0.190745095876189 0.32994051179057 0.254453447329624 "ENSG00000147596" 1
GO:0046058 "GO:0046058" "cAMP metabolic process" "1/160" "27/20505" 0.190745095876189 0.32994051179057 0.254453447329624 "ENSG00000148926" 1
GO:0055003 "GO:0055003" "cardiac myofibril assembly" "1/160" "27/20505" 0.190745095876189 0.32994051179057 0.254453447329624 "ENSG00000134853" 1
GO:0090140 "GO:0090140" "regulation of mitochondrial fission" "1/160" "27/20505" 0.190745095876189 0.32994051179057 0.254453447329624 "ENSG00000128052" 1
GO:0090189 "GO:0090189" "regulation of branching involved in ureteric bud morphogenesis" "1/160" "27/20505" 0.190745095876189 0.32994051179057 0.254453447329624 "ENSG00000273706" 1
GO:0097186 "GO:0097186" "amelogenesis" "1/160" "27/20505" 0.190745095876189 0.32994051179057 0.254453447329624 "ENSG00000177706" 1
GO:1904861 "GO:1904861" "excitatory synapse assembly" "1/160" "27/20505" 0.190745095876189 0.32994051179057 0.254453447329624 "ENSG00000114251" 1
GO:0051249 "GO:0051249" "regulation of lymphocyte activation" "6/160" "495/20505" 0.190959316020561 0.330115838865332 0.254588661336359 "ENSG00000164690/ENSG00000131203/ENSG00000110944/ENSG00000198846/ENSG00000160712/ENSG00000154342" 6
GO:0021543 "GO:0021543" "pallium development" "3/160" "193/20505" 0.191563213046347 0.330768830082978 0.255092254743256 "ENSG00000163508/ENSG00000154342/ENSG00000107831" 3
GO:0043534 "GO:0043534" "blood vessel endothelial cell migration" "3/160" "193/20505" 0.191563213046347 0.330768830082978 0.255092254743256 "ENSG00000128052/ENSG00000126561/ENSG00000176692" 3
GO:0010771 "GO:0010771" "negative regulation of cell morphogenesis involved in differentiation" "2/160" "103/20505" 0.192074742582656 0.331260979984829 0.255471805706698 "ENSG00000154342/ENSG00000114251" 2
GO:0048024 "GO:0048024" "regulation of mRNA splicing, via spliceosome" "2/160" "103/20505" 0.192074742582656 0.331260979984829 0.255471805706698 "ENSG00000188816/ENSG00000078328" 2
GO:0042180 "GO:0042180" "cellular ketone metabolic process" "3/160" "194/20505" 0.193539463992818 0.333393952991162 0.257116775982028 "ENSG00000131203/ENSG00000148926/ENSG00000009950" 3
GO:0071453 "GO:0071453" "cellular response to oxygen levels" "3/160" "194/20505" 0.193539463992818 0.333393952991162 0.257116775982028 "ENSG00000141448/ENSG00000100678/ENSG00000183023" 3
GO:0046545 "GO:0046545" "development of primary female sexual characteristics" "2/160" "104/20505" 0.194900368211858 0.333965208902545 0.257557334297131 "ENSG00000054598/ENSG00000134853" 2
GO:0031346 "GO:0031346" "positive regulation of cell projection organization" "5/160" "394/20505" 0.195185290870453 0.333965208902545 0.257557334297131 "ENSG00000165731/ENSG00000074660/ENSG00000154342/ENSG00000076356/ENSG00000114251" 5
GO:0046890 "GO:0046890" "regulation of lipid biosynthetic process" "3/160" "195/20505" 0.195520865733661 0.333965208902545 0.257557334297131 "ENSG00000009950/ENSG00000160179/ENSG00000019549" 3
GO:0048167 "GO:0048167" "regulation of synaptic plasticity" "3/160" "195/20505" 0.195520865733661 0.333965208902545 0.257557334297131 "ENSG00000157680/ENSG00000100678/ENSG00000183454" 3
GO:0002739 "GO:0002739" "regulation of cytokine secretion involved in immune response" "1/160" "28/20505" 0.19706801728745 0.333965208902545 0.257557334297131 "ENSG00000114251" 1
GO:0006688 "GO:0006688" "glycosphingolipid biosynthetic process" "1/160" "28/20505" 0.19706801728745 0.333965208902545 0.257557334297131 "ENSG00000148488" 1
GO:0006706 "GO:0006706" "steroid catabolic process" "1/160" "28/20505" 0.19706801728745 0.333965208902545 0.257557334297131 "ENSG00000074660" 1
GO:0010575 "GO:0010575" "positive regulation of vascular endothelial growth factor production" "1/160" "28/20505" 0.19706801728745 0.333965208902545 0.257557334297131 "ENSG00000156574" 1
GO:0010882 "GO:0010882" "regulation of cardiac muscle contraction by calcium ion signaling" "1/160" "28/20505" 0.19706801728745 0.333965208902545 0.257557334297131 "ENSG00000183023" 1
GO:0010894 "GO:0010894" "negative regulation of steroid biosynthetic process" "1/160" "28/20505" 0.19706801728745 0.333965208902545 0.257557334297131 "ENSG00000019549" 1
GO:0015949 "GO:0015949" "nucleobase-containing small molecule interconversion" "1/160" "28/20505" 0.19706801728745 0.333965208902545 0.257557334297131 "ENSG00000137198" 1
GO:0032372 "GO:0032372" "negative regulation of sterol transport" "1/160" "28/20505" 0.19706801728745 0.333965208902545 0.257557334297131 "ENSG00000164690" 1
GO:0032375 "GO:0032375" "negative regulation of cholesterol transport" "1/160" "28/20505" 0.19706801728745 0.333965208902545 0.257557334297131 "ENSG00000164690" 1
GO:0038065 "GO:0038065" "collagen-activated signaling pathway" "1/160" "28/20505" 0.19706801728745 0.333965208902545 0.257557334297131 "ENSG00000162733" 1
GO:0042219 "GO:0042219" "cellular modified amino acid catabolic process" "1/160" "28/20505" 0.19706801728745 0.333965208902545 0.257557334297131 "ENSG00000197406" 1
GO:0042359 "GO:0042359" "vitamin D metabolic process" "1/160" "28/20505" 0.19706801728745 0.333965208902545 0.257557334297131 "ENSG00000019549" 1
GO:0043304 "GO:0043304" "regulation of mast cell degranulation" "1/160" "28/20505" 0.19706801728745 0.333965208902545 0.257557334297131 "ENSG00000103241" 1
GO:0045736 "GO:0045736" "negative regulation of cyclin-dependent protein serine/threonine kinase activity" "1/160" "28/20505" 0.19706801728745 0.333965208902545 0.257557334297131 "ENSG00000152804" 1
GO:0046134 "GO:0046134" "pyrimidine nucleoside biosynthetic process" "1/160" "28/20505" 0.19706801728745 0.333965208902545 0.257557334297131 "ENSG00000158825" 1
GO:0048265 "GO:0048265" "response to pain" "1/160" "28/20505" 0.19706801728745 0.333965208902545 0.257557334297131 "ENSG00000165731" 1
GO:0048668 "GO:0048668" "collateral sprouting" "1/160" "28/20505" 0.19706801728745 0.333965208902545 0.257557334297131 "ENSG00000154342" 1
GO:0048730 "GO:0048730" "epidermis morphogenesis" "1/160" "28/20505" 0.19706801728745 0.333965208902545 0.257557334297131 "ENSG00000164690" 1
GO:0051152 "GO:0051152" "positive regulation of smooth muscle cell differentiation" "1/160" "28/20505" 0.19706801728745 0.333965208902545 0.257557334297131 "ENSG00000164690" 1
GO:0051450 "GO:0051450" "myoblast proliferation" "1/160" "28/20505" 0.19706801728745 0.333965208902545 0.257557334297131 "ENSG00000141448" 1
GO:0060384 "GO:0060384" "innervation" "1/160" "28/20505" 0.19706801728745 0.333965208902545 0.257557334297131 "ENSG00000165731" 1
GO:0072378 "GO:0072378" "blood coagulation, fibrin clot formation" "1/160" "28/20505" 0.19706801728745 0.333965208902545 0.257557334297131 "ENSG00000124491" 1
GO:0090022 "GO:0090022" "regulation of neutrophil chemotaxis" "1/160" "28/20505" 0.19706801728745 0.333965208902545 0.257557334297131 "ENSG00000110944" 1
GO:0097066 "GO:0097066" "response to thyroid hormone" "1/160" "28/20505" 0.19706801728745 0.333965208902545 0.257557334297131 "ENSG00000135363" 1
GO:0002042 "GO:0002042" "cell migration involved in sprouting angiogenesis" "2/160" "105/20505" 0.197731330961942 0.334701471680371 0.258125147570323 "ENSG00000128052/ENSG00000176692" 2
GO:0055006 "GO:0055006" "cardiac cell development" "2/160" "105/20505" 0.197731330961942 0.334701471680371 0.258125147570323 "ENSG00000183023/ENSG00000134853" 2
GO:0019933 "GO:0019933" "cAMP-mediated signaling" "3/160" "197/20505" 0.199498748100182 0.337302796643371 0.26013131559397 "ENSG00000173698/ENSG00000148926/ENSG00000134817" 3
GO:0071248 "GO:0071248" "cellular response to metal ion" "3/160" "197/20505" 0.199498748100182 0.337302796643371 0.26013131559397 "ENSG00000164690/ENSG00000165140/ENSG00000114251" 3
GO:0035567 "GO:0035567" "non-canonical Wnt signaling pathway" "2/160" "106/20505" 0.200567377595924 0.338718002002355 0.261222736227097 "ENSG00000146374/ENSG00000114251" 2
GO:0043467 "GO:0043467" "regulation of generation of precursor metabolites and energy" "2/160" "106/20505" 0.200567377595924 0.338718002002355 0.261222736227097 "ENSG00000165140/ENSG00000009950" 2
GO:0002230 "GO:0002230" "positive regulation of defense response to virus by host" "1/160" "29/20505" 0.203341842419746 0.340371370701335 0.262497830827876 "ENSG00000110944" 1
GO:0002643 "GO:0002643" "regulation of tolerance induction" "1/160" "29/20505" 0.203341842419746 0.340371370701335 0.262497830827876 "ENSG00000131203" 1
GO:0002888 "GO:0002888" "positive regulation of myeloid leukocyte mediated immunity" "1/160" "29/20505" 0.203341842419746 0.340371370701335 0.262497830827876 "ENSG00000204936" 1
GO:0003413 "GO:0003413" "chondrocyte differentiation involved in endochondral bone morphogenesis" "1/160" "29/20505" 0.203341842419746 0.340371370701335 0.262497830827876 "ENSG00000165816" 1
GO:0018146 "GO:0018146" "keratan sulfate biosynthetic process" "1/160" "29/20505" 0.203341842419746 0.340371370701335 0.262497830827876 "ENSG00000156966" 1
GO:0033006 "GO:0033006" "regulation of mast cell activation involved in immune response" "1/160" "29/20505" 0.203341842419746 0.340371370701335 0.262497830827876 "ENSG00000103241" 1
GO:0033598 "GO:0033598" "mammary gland epithelial cell proliferation" "1/160" "29/20505" 0.203341842419746 0.340371370701335 0.262497830827876 "ENSG00000114251" 1
GO:0034698 "GO:0034698" "response to gonadotropin" "1/160" "29/20505" 0.203341842419746 0.340371370701335 0.262497830827876 "ENSG00000141448" 1
GO:0035025 "GO:0035025" "positive regulation of Rho protein signal transduction" "1/160" "29/20505" 0.203341842419746 0.340371370701335 0.262497830827876 "ENSG00000139679" 1
GO:0072202 "GO:0072202" "cell differentiation involved in metanephros development" "1/160" "29/20505" 0.203341842419746 0.340371370701335 0.262497830827876 "ENSG00000125931" 1
GO:1903319 "GO:1903319" "positive regulation of protein maturation" "1/160" "29/20505" 0.203341842419746 0.340371370701335 0.262497830827876 "ENSG00000262655" 1
GO:1904030 "GO:1904030" "negative regulation of cyclin-dependent protein kinase activity" "1/160" "29/20505" 0.203341842419746 0.340371370701335 0.262497830827876 "ENSG00000152804" 1
GO:2000810 "GO:2000810" "regulation of bicellular tight junction assembly" "1/160" "29/20505" 0.203341842419746 0.340371370701335 0.262497830827876 "ENSG00000019549" 1
GO:2001171 "GO:2001171" "positive regulation of ATP biosynthetic process" "1/160" "29/20505" 0.203341842419746 0.340371370701335 0.262497830827876 "ENSG00000009950" 1
GO:0045639 "GO:0045639" "positive regulation of myeloid cell differentiation" "2/160" "107/20505" 0.203408258456729 0.340371370701335 0.262497830827876 "ENSG00000157368/ENSG00000110944" 2
GO:0090630 "GO:0090630" "activation of GTPase activity" "2/160" "107/20505" 0.203408258456729 0.340371370701335 0.262497830827876 "ENSG00000146904/ENSG00000114251" 2
GO:0010632 "GO:0010632" "regulation of epithelial cell migration" "4/160" "299/20505" 0.205847533852238 0.344256167248598 0.265493825070174 "ENSG00000128052/ENSG00000126561/ENSG00000176692/ENSG00000114251" 4
GO:0002237 "GO:0002237" "response to molecule of bacterial origin" "5/160" "402/20505" 0.206101525200929 0.344287242268828 0.265517790438902 "ENSG00000131203/ENSG00000148926/ENSG00000181195/ENSG00000125931/ENSG00000114251" 5
GO:0045862 "GO:0045862" "positive regulation of proteolysis" "5/160" "402/20505" 0.206101525200929 0.344287242268828 0.265517790438902 "ENSG00000156574/ENSG00000142405/ENSG00000154342/ENSG00000183454/ENSG00000262655" 5
GO:0008593 "GO:0008593" "regulation of Notch signaling pathway" "2/160" "108/20505" 0.206253727427341 0.344344836030235 0.265562207328041 "ENSG00000100060/ENSG00000198719" 2
GO:1901888 "GO:1901888" "regulation of cell junction assembly" "2/160" "109/20505" 0.209103541891347 0.345732278112113 0.266632216642108 "ENSG00000128052/ENSG00000019549" 2
GO:0002828 "GO:0002828" "regulation of type 2 immune response" "1/160" "30/20505" 0.209566950117189 0.345732278112113 0.266632216642108 "ENSG00000131203" 1
GO:0006929 "GO:0006929" "substrate-dependent cell migration" "1/160" "30/20505" 0.209566950117189 0.345732278112113 0.266632216642108 "ENSG00000019549" 1
GO:0008210 "GO:0008210" "estrogen metabolic process" "1/160" "30/20505" 0.209566950117189 0.345732278112113 0.266632216642108 "ENSG00000134853" 1
GO:0009074 "GO:0009074" "aromatic amino acid family catabolic process" "1/160" "30/20505" 0.209566950117189 0.345732278112113 0.266632216642108 "ENSG00000131203" 1
GO:0009110 "GO:0009110" "vitamin biosynthetic process" "1/160" "30/20505" 0.209566950117189 0.345732278112113 0.266632216642108 "ENSG00000019549" 1
GO:0010543 "GO:0010543" "regulation of platelet activation" "1/160" "30/20505" 0.209566950117189 0.345732278112113 0.266632216642108 "ENSG00000134853" 1
GO:0010644 "GO:0010644" "cell communication by electrical coupling" "1/160" "30/20505" 0.209566950117189 0.345732278112113 0.266632216642108 "ENSG00000183023" 1
GO:0030511 "GO:0030511" "positive regulation of transforming growth factor beta receptor signaling pathway" "1/160" "30/20505" 0.209566950117189 0.345732278112113 0.266632216642108 "ENSG00000125931" 1
GO:0032733 "GO:0032733" "positive regulation of interleukin-10 production" "1/160" "30/20505" 0.209566950117189 0.345732278112113 0.266632216642108 "ENSG00000110944" 1
GO:0038111 "GO:0038111" "interleukin-7-mediated signaling pathway" "1/160" "30/20505" 0.209566950117189 0.345732278112113 0.266632216642108 "ENSG00000126561" 1
GO:0043372 "GO:0043372" "positive regulation of CD4-positive, alpha-beta T cell differentiation" "1/160" "30/20505" 0.209566950117189 0.345732278112113 0.266632216642108 "ENSG00000110944" 1
GO:0045939 "GO:0045939" "negative regulation of steroid metabolic process" "1/160" "30/20505" 0.209566950117189 0.345732278112113 0.266632216642108 "ENSG00000019549" 1
GO:0048245 "GO:0048245" "eosinophil chemotaxis" "1/160" "30/20505" 0.209566950117189 0.345732278112113 0.266632216642108 "ENSG00000006606" 1
GO:0060765 "GO:0060765" "regulation of androgen receptor signaling pathway" "1/160" "30/20505" 0.209566950117189 0.345732278112113 0.266632216642108 "ENSG00000156574" 1
GO:0061217 "GO:0061217" "regulation of mesonephros development" "1/160" "30/20505" 0.209566950117189 0.345732278112113 0.266632216642108 "ENSG00000273706" 1
GO:0070570 "GO:0070570" "regulation of neuron projection regeneration" "1/160" "30/20505" 0.209566950117189 0.345732278112113 0.266632216642108 "ENSG00000074660" 1
GO:0072538 "GO:0072538" "T-helper 17 type immune response" "1/160" "30/20505" 0.209566950117189 0.345732278112113 0.266632216642108 "ENSG00000110944" 1
GO:0072606 "GO:0072606" "interleukin-8 secretion" "1/160" "30/20505" 0.209566950117189 0.345732278112113 0.266632216642108 "ENSG00000114251" 1
GO:1902692 "GO:1902692" "regulation of neuroblast proliferation" "1/160" "30/20505" 0.209566950117189 0.345732278112113 0.266632216642108 "ENSG00000164690" 1
GO:1903846 "GO:1903846" "positive regulation of cellular response to transforming growth factor beta stimulus" "1/160" "30/20505" 0.209566950117189 0.345732278112113 0.266632216642108 "ENSG00000125931" 1
GO:0007626 "GO:0007626" "locomotory behavior" "3/160" "203/20505" 0.211546360451855 0.348604565815029 0.268847353861127 "ENSG00000184254/ENSG00000131203/ENSG00000181195" 3
GO:0010921 "GO:0010921" "regulation of phosphatase activity" "3/160" "203/20505" 0.211546360451855 0.348604565815029 0.268847353861127 "ENSG00000101445/ENSG00000156475/ENSG00000198729" 3
GO:0007229 "GO:0007229" "integrin-mediated signaling pathway" "2/160" "110/20505" 0.211957462693882 0.348888901733037 0.269066636586198 "ENSG00000204936/ENSG00000105855" 2
GO:0042446 "GO:0042446" "hormone biosynthetic process" "2/160" "110/20505" 0.211957462693882 0.348888901733037 0.269066636586198 "ENSG00000148926/ENSG00000197406" 2
GO:0006575 "GO:0006575" "cellular modified amino acid metabolic process" "3/160" "204/20505" 0.213569952402931 0.35019443409154 0.270073476296238 "ENSG00000126561/ENSG00000197406/ENSG00000176928" 3
GO:0007159 "GO:0007159" "leukocyte cell-cell adhesion" "5/160" "408/20505" 0.214420199543081 0.35019443409154 0.270073476296238 "ENSG00000204936/ENSG00000164690/ENSG00000131203/ENSG00000110944/ENSG00000160712" 5
GO:0019359 "GO:0019359" "nicotinamide nucleotide biosynthetic process" "2/160" "111/20505" 0.214815254102957 0.35019443409154 0.270073476296238 "ENSG00000165140/ENSG00000009950" 2
GO:0019363 "GO:0019363" "pyridine nucleotide biosynthetic process" "2/160" "111/20505" 0.214815254102957 0.35019443409154 0.270073476296238 "ENSG00000165140/ENSG00000009950" 2
GO:0032612 "GO:0032612" "interleukin-1 production" "2/160" "111/20505" 0.214815254102957 0.35019443409154 0.270073476296238 "ENSG00000142405/ENSG00000114251" 2
GO:0048640 "GO:0048640" "negative regulation of developmental growth" "2/160" "111/20505" 0.214815254102957 0.35019443409154 0.270073476296238 "ENSG00000154342/ENSG00000114251" 2
GO:0061387 "GO:0061387" "regulation of extent of cell growth" "2/160" "111/20505" 0.214815254102957 0.35019443409154 0.270073476296238 "ENSG00000154342/ENSG00000114251" 2
GO:0001893 "GO:0001893" "maternal placenta development" "1/160" "31/20505" 0.215743716318959 0.35019443409154 0.270073476296238 "ENSG00000156574" 1
GO:0002374 "GO:0002374" "cytokine secretion involved in immune response" "1/160" "31/20505" 0.215743716318959 0.35019443409154 0.270073476296238 "ENSG00000114251" 1
GO:0003209 "GO:0003209" "cardiac atrium morphogenesis" "1/160" "31/20505" 0.215743716318959 0.35019443409154 0.270073476296238 "ENSG00000114251" 1
GO:0010743 "GO:0010743" "regulation of macrophage derived foam cell differentiation" "1/160" "31/20505" 0.215743716318959 0.35019443409154 0.270073476296238 "ENSG00000160179" 1
GO:0010880 "GO:0010880" "regulation of release of sequestered calcium ion into cytosol by sarcoplasmic reticulum" "1/160" "31/20505" 0.215743716318959 0.35019443409154 0.270073476296238 "ENSG00000183023" 1
GO:0030431 "GO:0030431" "sleep" "1/160" "31/20505" 0.215743716318959 0.35019443409154 0.270073476296238 "ENSG00000183454" 1
GO:0032620 "GO:0032620" "interleukin-17 production" "1/160" "31/20505" 0.215743716318959 0.35019443409154 0.270073476296238 "ENSG00000110944" 1
GO:0035066 "GO:0035066" "positive regulation of histone acetylation" "1/160" "31/20505" 0.215743716318959 0.35019443409154 0.270073476296238 "ENSG00000019549" 1
GO:0043552 "GO:0043552" "positive regulation of phosphatidylinositol 3-kinase activity" "1/160" "31/20505" 0.215743716318959 0.35019443409154 0.270073476296238 "ENSG00000134853" 1
GO:0045672 "GO:0045672" "positive regulation of osteoclast differentiation" "1/160" "31/20505" 0.215743716318959 0.35019443409154 0.270073476296238 "ENSG00000110944" 1
GO:0045742 "GO:0045742" "positive regulation of epidermal growth factor receptor signaling pathway" "1/160" "31/20505" 0.215743716318959 0.35019443409154 0.270073476296238 "ENSG00000163235" 1
GO:0048535 "GO:0048535" "lymph node development" "1/160" "31/20505" 0.215743716318959 0.35019443409154 0.270073476296238 "ENSG00000198846" 1
GO:0061037 "GO:0061037" "negative regulation of cartilage development" "1/160" "31/20505" 0.215743716318959 0.35019443409154 0.270073476296238 "ENSG00000019549" 1
GO:0061082 "GO:0061082" "myeloid leukocyte cytokine production" "1/160" "31/20505" 0.215743716318959 0.35019443409154 0.270073476296238 "ENSG00000114251" 1
GO:0098760 "GO:0098760" "response to interleukin-7" "1/160" "31/20505" 0.215743716318959 0.35019443409154 0.270073476296238 "ENSG00000126561" 1
GO:0098761 "GO:0098761" "cellular response to interleukin-7" "1/160" "31/20505" 0.215743716318959 0.35019443409154 0.270073476296238 "ENSG00000126561" 1
GO:1902622 "GO:1902622" "regulation of neutrophil migration" "1/160" "31/20505" 0.215743716318959 0.35019443409154 0.270073476296238 "ENSG00000110944" 1
GO:1904837 "GO:1904837" "beta-catenin-TCF complex assembly" "1/160" "31/20505" 0.215743716318959 0.35019443409154 0.270073476296238 "ENSG00000065717" 1
GO:0002695 "GO:0002695" "negative regulation of leukocyte activation" "3/160" "206/20505" 0.217629739074291 0.352940299351819 0.272191115253603 "ENSG00000164690/ENSG00000131203/ENSG00000103241" 3
GO:0006024 "GO:0006024" "glycosaminoglycan biosynthetic process" "2/160" "112/20505" 0.217676683771173 0.352940299351819 0.272191115253603 "ENSG00000103888/ENSG00000156966" 2
GO:0022408 "GO:0022408" "negative regulation of cell-cell adhesion" "3/160" "207/20505" 0.219665754020632 0.355603892431891 0.274245305076579 "ENSG00000164690/ENSG00000131203/ENSG00000019549" 3
GO:0002699 "GO:0002699" "positive regulation of immune effector process" "4/160" "308/20505" 0.220511966871286 0.355603892431891 0.274245305076579 "ENSG00000204936/ENSG00000110944/ENSG00000103241/ENSG00000114251" 4
GO:0030100 "GO:0030100" "regulation of endocytosis" "4/160" "308/20505" 0.220511966871286 0.355603892431891 0.274245305076579 "ENSG00000204936/ENSG00000198719/ENSG00000154342/ENSG00000114251" 4
GO:0002286 "GO:0002286" "T cell activation involved in immune response" "2/160" "113/20505" 0.220541522697829 0.355603892431891 0.274245305076579 "ENSG00000163508/ENSG00000110944" 2
GO:0002544 "GO:0002544" "chronic inflammatory response" "1/160" "32/20505" 0.221872514081436 0.355603892431891 0.274245305076579 "ENSG00000131203" 1
GO:0010719 "GO:0010719" "negative regulation of epithelial to mesenchymal transition" "1/160" "32/20505" 0.221872514081436 0.355603892431891 0.274245305076579 "ENSG00000168675" 1
GO:0010837 "GO:0010837" "regulation of keratinocyte proliferation" "1/160" "32/20505" 0.221872514081436 0.355603892431891 0.274245305076579 "ENSG00000019549" 1
GO:0018195 "GO:0018195" "peptidyl-arginine modification" "1/160" "32/20505" 0.221872514081436 0.355603892431891 0.274245305076579 "ENSG00000147596" 1
GO:0030277 "GO:0030277" "maintenance of gastrointestinal epithelium" "1/160" "32/20505" 0.221872514081436 0.355603892431891 0.274245305076579 "ENSG00000160180" 1
GO:0035767 "GO:0035767" "endothelial cell chemotaxis" "1/160" "32/20505" 0.221872514081436 0.355603892431891 0.274245305076579 "ENSG00000128052" 1
GO:0043032 "GO:0043032" "positive regulation of macrophage activation" "1/160" "32/20505" 0.221872514081436 0.355603892431891 0.274245305076579 "ENSG00000114251" 1
GO:0045745 "GO:0045745" "positive regulation of G protein-coupled receptor signaling pathway" "1/160" "32/20505" 0.221872514081436 0.355603892431891 0.274245305076579 "ENSG00000114251" 1
GO:0048873 "GO:0048873" "homeostasis of number of cells within a tissue" "1/160" "32/20505" 0.221872514081436 0.355603892431891 0.274245305076579 "ENSG00000147596" 1
GO:0050927 "GO:0050927" "positive regulation of positive chemotaxis" "1/160" "32/20505" 0.221872514081436 0.355603892431891 0.274245305076579 "ENSG00000128052" 1
GO:0060325 "GO:0060325" "face morphogenesis" "1/160" "32/20505" 0.221872514081436 0.355603892431891 0.274245305076579 "ENSG00000134853" 1
GO:0060338 "GO:0060338" "regulation of type I interferon-mediated signaling pathway" "1/160" "32/20505" 0.221872514081436 0.355603892431891 0.274245305076579 "ENSG00000114251" 1
GO:0060444 "GO:0060444" "branching involved in mammary gland duct morphogenesis" "1/160" "32/20505" 0.221872514081436 0.355603892431891 0.274245305076579 "ENSG00000114251" 1
GO:0061036 "GO:0061036" "positive regulation of cartilage development" "1/160" "32/20505" 0.221872514081436 0.355603892431891 0.274245305076579 "ENSG00000114251" 1
GO:0090075 "GO:0090075" "relaxation of muscle" "1/160" "32/20505" 0.221872514081436 0.355603892431891 0.274245305076579 "ENSG00000183023" 1
GO:1901223 "GO:1901223" "negative regulation of NIK/NF-kappaB signaling" "1/160" "32/20505" 0.221872514081436 0.355603892431891 0.274245305076579 "ENSG00000142405" 1
GO:1903393 "GO:1903393" "positive regulation of adherens junction organization" "1/160" "32/20505" 0.221872514081436 0.355603892431891 0.274245305076579 "ENSG00000128052" 1
GO:0009410 "GO:0009410" "response to xenobiotic stimulus" "4/160" "309/20505" 0.222158698358368 0.355867575409762 0.274448660046107 "ENSG00000126561/ENSG00000181195/ENSG00000183023/ENSG00000183454" 4
GO:0072525 "GO:0072525" "pyridine-containing compound biosynthetic process" "2/160" "114/20505" 0.223409545191392 0.357675380232525 0.275842857341719 "ENSG00000165140/ENSG00000009950" 2
GO:0010769 "GO:0010769" "regulation of cell morphogenesis involved in differentiation" "4/160" "310/20505" 0.223808729716313 0.358118454278017 0.276184560510226 "ENSG00000165731/ENSG00000154342/ENSG00000076356/ENSG00000114251" 4
GO:0010906 "GO:0010906" "regulation of glucose metabolic process" "2/160" "115/20505" 0.226280528832362 0.360998707244444 0.278405840620727 "ENSG00000160180/ENSG00000165140" 2
GO:0030593 "GO:0030593" "neutrophil chemotaxis" "2/160" "115/20505" 0.226280528832362 0.360998707244444 0.278405840620727 "ENSG00000110944/ENSG00000006606" 2
GO:0050829 "GO:0050829" "defense response to Gram-negative bacterium" "2/160" "115/20505" 0.226280528832362 0.360998707244444 0.278405840620727 "ENSG00000110944/ENSG00000160712" 2
GO:1902105 "GO:1902105" "regulation of leukocyte differentiation" "4/160" "312/20505" 0.227118506840369 0.360998707244444 0.278405840620727 "ENSG00000157368/ENSG00000164690/ENSG00000110944/ENSG00000198846" 4
GO:0003299 "GO:0003299" "muscle hypertrophy in response to stress" "1/160" "33/20505" 0.227953713600167 0.360998707244444 0.278405840620727 "ENSG00000141448" 1
GO:0010574 "GO:0010574" "regulation of vascular endothelial growth factor production" "1/160" "33/20505" 0.227953713600167 0.360998707244444 0.278405840620727 "ENSG00000156574" 1
GO:0010842 "GO:0010842" "retina layer formation" "1/160" "33/20505" 0.227953713600167 0.360998707244444 0.278405840620727 "ENSG00000273706" 1
GO:0014887 "GO:0014887" "cardiac muscle adaptation" "1/160" "33/20505" 0.227953713600167 0.360998707244444 0.278405840620727 "ENSG00000141448" 1
GO:0014898 "GO:0014898" "cardiac muscle hypertrophy in response to stress" "1/160" "33/20505" 0.227953713600167 0.360998707244444 0.278405840620727 "ENSG00000141448" 1
GO:0036037 "GO:0036037" "CD8-positive, alpha-beta T cell activation" "1/160" "33/20505" 0.227953713600167 0.360998707244444 0.278405840620727 "ENSG00000163508" 1
GO:0043516 "GO:0043516" "regulation of DNA damage response, signal transduction by p53 class mediator" "1/160" "33/20505" 0.227953713600167 0.360998707244444 0.278405840620727 "ENSG00000019549" 1
GO:0050926 "GO:0050926" "regulation of positive chemotaxis" "1/160" "33/20505" 0.227953713600167 0.360998707244444 0.278405840620727 "ENSG00000128052" 1
GO:0051482 "GO:0051482" "positive regulation of cytosolic calcium ion concentration involved in phospholipase C-activating G protein-coupled signaling pathway" "1/160" "33/20505" 0.227953713600167 0.360998707244444 0.278405840620727 "ENSG00000139679" 1
GO:0071402 "GO:0071402" "cellular response to lipoprotein particle stimulus" "1/160" "33/20505" 0.227953713600167 0.360998707244444 0.278405840620727 "ENSG00000160179" 1
GO:0090314 "GO:0090314" "positive regulation of protein targeting to membrane" "1/160" "33/20505" 0.227953713600167 0.360998707244444 0.278405840620727 "ENSG00000103888" 1
GO:1901186 "GO:1901186" "positive regulation of ERBB signaling pathway" "1/160" "33/20505" 0.227953713600167 0.360998707244444 0.278405840620727 "ENSG00000163235" 1
GO:1902230 "GO:1902230" "negative regulation of intrinsic apoptotic signaling pathway in response to DNA damage" "1/160" "33/20505" 0.227953713600167 0.360998707244444 0.278405840620727 "ENSG00000019549" 1
GO:1905063 "GO:1905063" "regulation of vascular smooth muscle cell differentiation" "1/160" "33/20505" 0.227953713600167 0.360998707244444 0.278405840620727 "ENSG00000102678" 1
GO:1905314 "GO:1905314" "semi-lunar valve development" "1/160" "33/20505" 0.227953713600167 0.360998707244444 0.278405840620727 "ENSG00000019549" 1
GO:0006023 "GO:0006023" "aminoglycan biosynthetic process" "2/160" "116/20505" 0.229154254436489 0.361920191267133 0.279116498384333 "ENSG00000103888/ENSG00000156966" 2
GO:0010508 "GO:0010508" "positive regulation of autophagy" "2/160" "116/20505" 0.229154254436489 0.361920191267133 0.279116498384333 "ENSG00000128052/ENSG00000102096" 2
GO:0042035 "GO:0042035" "regulation of cytokine biosynthetic process" "2/160" "116/20505" 0.229154254436489 0.361920191267133 0.279116498384333 "ENSG00000142405/ENSG00000114251" 2
GO:0043279 "GO:0043279" "response to alkaloid" "2/160" "116/20505" 0.229154254436489 0.361920191267133 0.279116498384333 "ENSG00000181195/ENSG00000183023" 2
GO:0071674 "GO:0071674" "mononuclear cell migration" "2/160" "116/20505" 0.229154254436489 0.361920191267133 0.279116498384333 "ENSG00000160712/ENSG00000006606" 2
GO:0043523 "GO:0043523" "regulation of neuron apoptotic process" "3/160" "213/20505" 0.231961943288682 0.364631843648169 0.281207752024481 "ENSG00000124493/ENSG00000125931/ENSG00000107831" 3
GO:0021782 "GO:0021782" "glial cell development" "2/160" "117/20505" 0.23203050601838 0.364631843648169 0.281207752024481 "ENSG00000164690/ENSG00000198719" 2
GO:0046916 "GO:0046916" "cellular transition metal ion homeostasis" "2/160" "117/20505" 0.23203050601838 0.364631843648169 0.281207752024481 "ENSG00000118777/ENSG00000168079" 2
GO:0070252 "GO:0070252" "actin-mediated cell contraction" "2/160" "117/20505" 0.23203050601838 0.364631843648169 0.281207752024481 "ENSG00000120457/ENSG00000162989" 2
GO:0071156 "GO:0071156" "regulation of cell cycle arrest" "2/160" "117/20505" 0.23203050601838 0.364631843648169 0.281207752024481 "ENSG00000141448/ENSG00000009950" 2
GO:0001975 "GO:0001975" "response to amphetamine" "1/160" "34/20505" 0.233987682231663 0.364631843648169 0.281207752024481 "ENSG00000183454" 1
GO:0008608 "GO:0008608" "attachment of spindle microtubules to kinetochore" "1/160" "34/20505" 0.233987682231663 0.364631843648169 0.281207752024481 "ENSG00000105146" 1
GO:0009164 "GO:0009164" "nucleoside catabolic process" "1/160" "34/20505" 0.233987682231663 0.364631843648169 0.281207752024481 "ENSG00000158825" 1
GO:0021955 "GO:0021955" "central nervous system neuron axonogenesis" "1/160" "34/20505" 0.233987682231663 0.364631843648169 0.281207752024481 "ENSG00000140937" 1
GO:0032148 "GO:0032148" "activation of protein kinase B activity" "1/160" "34/20505" 0.233987682231663 0.364631843648169 0.281207752024481 "ENSG00000114251" 1
GO:0034243 "GO:0034243" "regulation of transcription elongation from RNA polymerase II promoter" "1/160" "34/20505" 0.233987682231663 0.364631843648169 0.281207752024481 "ENSG00000164690" 1
GO:0034368 "GO:0034368" "protein-lipid complex remodeling" "1/160" "34/20505" 0.233987682231663 0.364631843648169 0.281207752024481 "ENSG00000160179" 1
GO:0034369 "GO:0034369" "plasma lipoprotein particle remodeling" "1/160" "34/20505" 0.233987682231663 0.364631843648169 0.281207752024481 "ENSG00000160179" 1
GO:0040020 "GO:0040020" "regulation of meiotic nuclear division" "1/160" "34/20505" 0.233987682231663 0.364631843648169 0.281207752024481 "ENSG00000114251" 1
GO:0042339 "GO:0042339" "keratan sulfate metabolic process" "1/160" "34/20505" 0.233987682231663 0.364631843648169 0.281207752024481 "ENSG00000156966" 1
GO:0042554 "GO:0042554" "superoxide anion generation" "1/160" "34/20505" 0.233987682231663 0.364631843648169 0.281207752024481 "ENSG00000204936" 1
GO:0043276 "GO:0043276" "anoikis" "1/160" "34/20505" 0.233987682231663 0.364631843648169 0.281207752024481 "ENSG00000019549" 1
GO:0045920 "GO:0045920" "negative regulation of exocytosis" "1/160" "34/20505" 0.233987682231663 0.364631843648169 0.281207752024481 "ENSG00000103241" 1
GO:0050931 "GO:0050931" "pigment cell differentiation" "1/160" "34/20505" 0.233987682231663 0.364631843648169 0.281207752024481 "ENSG00000125931" 1
GO:0060674 "GO:0060674" "placenta blood vessel development" "1/160" "34/20505" 0.233987682231663 0.364631843648169 0.281207752024481 "ENSG00000105855" 1
GO:0070528 "GO:0070528" "protein kinase C signaling" "1/160" "34/20505" 0.233987682231663 0.364631843648169 0.281207752024481 "ENSG00000114251" 1
GO:0072677 "GO:0072677" "eosinophil migration" "1/160" "34/20505" 0.233987682231663 0.364631843648169 0.281207752024481 "ENSG00000006606" 1
GO:1902742 "GO:1902742" "apoptotic process involved in development" "1/160" "34/20505" 0.233987682231663 0.364631843648169 0.281207752024481 "ENSG00000054598" 1
GO:2000516 "GO:2000516" "positive regulation of CD4-positive, alpha-beta T cell activation" "1/160" "34/20505" 0.233987682231663 0.364631843648169 0.281207752024481 "ENSG00000110944" 1
GO:2000758 "GO:2000758" "positive regulation of peptidyl-lysine acetylation" "1/160" "34/20505" 0.233987682231663 0.364631843648169 0.281207752024481 "ENSG00000019549" 1
GO:0006090 "GO:0006090" "pyruvate metabolic process" "2/160" "118/20505" 0.234909070755451 0.365678037232408 0.282014587058588 "ENSG00000165140/ENSG00000009950" 2
GO:0018107 "GO:0018107" "peptidyl-threonine phosphorylation" "2/160" "118/20505" 0.234909070755451 0.365678037232408 0.282014587058588 "ENSG00000103888/ENSG00000114251" 2
GO:0051783 "GO:0051783" "regulation of nuclear division" "3/160" "215/20505" 0.236089078640455 0.36712416534999 0.283129855634738 "ENSG00000163235/ENSG00000107831/ENSG00000114251" 3
GO:1901215 "GO:1901215" "negative regulation of neuron death" "3/160" "215/20505" 0.236089078640455 0.36712416534999 0.283129855634738 "ENSG00000125931/ENSG00000154342/ENSG00000107831" 3
GO:0050808 "GO:0050808" "synapse organization" "5/160" "424/20505" 0.237104862782926 0.368465220318362 0.284164090739451 "ENSG00000141668/ENSG00000107742/ENSG00000154342/ENSG00000187122/ENSG00000114251" 5
GO:0006754 "GO:0006754" "ATP biosynthetic process" "2/160" "119/20505" 0.237789738952259 0.368465220318362 0.284164090739451 "ENSG00000165140/ENSG00000009950" 2
GO:0009132 "GO:0009132" "nucleoside diphosphate metabolic process" "2/160" "119/20505" 0.237789738952259 0.368465220318362 0.284164090739451 "ENSG00000165140/ENSG00000009950" 2
GO:0042552 "GO:0042552" "myelination" "2/160" "119/20505" 0.237789738952259 0.368465220318362 0.284164090739451 "ENSG00000121966/ENSG00000100678" 2
GO:0071887 "GO:0071887" "leukocyte apoptotic process" "2/160" "119/20505" 0.237789738952259 0.368465220318362 0.284164090739451 "ENSG00000131203/ENSG00000114251" 2
GO:0003230 "GO:0003230" "cardiac atrium development" "1/160" "35/20505" 0.239974784515036 0.368465220318362 0.284164090739451 "ENSG00000114251" 1
GO:0007223 "GO:0007223" "Wnt signaling pathway, calcium modulating pathway" "1/160" "35/20505" 0.239974784515036 0.368465220318362 0.284164090739451 "ENSG00000114251" 1
GO:0010573 "GO:0010573" "vascular endothelial growth factor production" "1/160" "35/20505" 0.239974784515036 0.368465220318362 0.284164090739451 "ENSG00000156574" 1
GO:0033198 "GO:0033198" "response to ATP" "1/160" "35/20505" 0.239974784515036 0.368465220318362 0.284164090739451 "ENSG00000183023" 1
GO:0035909 "GO:0035909" "aorta morphogenesis" "1/160" "35/20505" 0.239974784515036 0.368465220318362 0.284164090739451 "ENSG00000107831" 1
GO:0045622 "GO:0045622" "regulation of T-helper cell differentiation" "1/160" "35/20505" 0.239974784515036 0.368465220318362 0.284164090739451 "ENSG00000110944" 1
GO:0045923 "GO:0045923" "positive regulation of fatty acid metabolic process" "1/160" "35/20505" 0.239974784515036 0.368465220318362 0.284164090739451 "ENSG00000009950" 1
GO:0048536 "GO:0048536" "spleen development" "1/160" "35/20505" 0.239974784515036 0.368465220318362 0.284164090739451 "ENSG00000164093" 1
GO:0048665 "GO:0048665" "neuron fate specification" "1/160" "35/20505" 0.239974784515036 0.368465220318362 0.284164090739451 "ENSG00000198719" 1
GO:0070207 "GO:0070207" "protein homotrimerization" "1/160" "35/20505" 0.239974784515036 0.368465220318362 0.284164090739451 "ENSG00000168079" 1
GO:0071354 "GO:0071354" "cellular response to interleukin-6" "1/160" "35/20505" 0.239974784515036 0.368465220318362 0.284164090739451 "ENSG00000160712" 1
GO:0071392 "GO:0071392" "cellular response to estradiol stimulus" "1/160" "35/20505" 0.239974784515036 0.368465220318362 0.284164090739451 "ENSG00000139874" 1
GO:0071985 "GO:0071985" "multivesicular body sorting pathway" "1/160" "35/20505" 0.239974784515036 0.368465220318362 0.284164090739451 "ENSG00000102362" 1
GO:0090218 "GO:0090218" "positive regulation of lipid kinase activity" "1/160" "35/20505" 0.239974784515036 0.368465220318362 0.284164090739451 "ENSG00000134853" 1
GO:0140115 "GO:0140115" "export across plasma membrane" "1/160" "35/20505" 0.239974784515036 0.368465220318362 0.284164090739451 "ENSG00000183023" 1
GO:1902932 "GO:1902932" "positive regulation of alcohol biosynthetic process" "1/160" "35/20505" 0.239974784515036 0.368465220318362 0.284164090739451 "ENSG00000160179" 1
GO:1903580 "GO:1903580" "positive regulation of ATP metabolic process" "1/160" "35/20505" 0.239974784515036 0.368465220318362 0.284164090739451 "ENSG00000009950" 1
GO:2000249 "GO:2000249" "regulation of actin cytoskeleton reorganization" "1/160" "35/20505" 0.239974784515036 0.368465220318362 0.284164090739451 "ENSG00000134853" 1
GO:2000352 "GO:2000352" "negative regulation of endothelial cell apoptotic process" "1/160" "35/20505" 0.239974784515036 0.368465220318362 0.284164090739451 "ENSG00000128052" 1
GO:0010876 "GO:0010876" "lipid localization" "5/160" "427/20505" 0.241432706163272 0.37050926837753 0.285740481199477 "ENSG00000164690/ENSG00000121207/ENSG00000160179/ENSG00000118777/ENSG00000106484" 5
GO:0007162 "GO:0007162" "negative regulation of cell adhesion" "4/160" "321/20505" 0.24216365294099 0.371436122104036 0.286455280132775 "ENSG00000164690/ENSG00000131203/ENSG00000019549/ENSG00000076356" 4
GO:0006664 "GO:0006664" "glycolipid metabolic process" "2/160" "121/20505" 0.243556562367439 0.372888798815918 0.287575599050837 "ENSG00000105855/ENSG00000148488" 2
GO:0007272 "GO:0007272" "ensheathment of neurons" "2/160" "121/20505" 0.243556562367439 0.372888798815918 0.287575599050837 "ENSG00000121966/ENSG00000100678" 2
GO:0008366 "GO:0008366" "axon ensheathment" "2/160" "121/20505" 0.243556562367439 0.372888798815918 0.287575599050837 "ENSG00000121966/ENSG00000100678" 2
GO:0016051 "GO:0016051" "carbohydrate biosynthetic process" "3/160" "219/20505" 0.244381804188712 0.372888798815918 0.287575599050837 "ENSG00000156966/ENSG00000165140/ENSG00000148488" 3
GO:0030212 "GO:0030212" "hyaluronan metabolic process" "1/160" "36/20505" 0.245915382193472 0.372888798815918 0.287575599050837 "ENSG00000103888" 1
GO:0034367 "GO:0034367" "protein-containing complex remodeling" "1/160" "36/20505" 0.245915382193472 0.372888798815918 0.287575599050837 "ENSG00000160179" 1
GO:0040018 "GO:0040018" "positive regulation of multicellular organism growth" "1/160" "36/20505" 0.245915382193472 0.372888798815918 0.287575599050837 "ENSG00000197406" 1
GO:0042036 "GO:0042036" "negative regulation of cytokine biosynthetic process" "1/160" "36/20505" 0.245915382193472 0.372888798815918 0.287575599050837 "ENSG00000142405" 1
GO:0042092 "GO:0042092" "type 2 immune response" "1/160" "36/20505" 0.245915382193472 0.372888798815918 0.287575599050837 "ENSG00000131203" 1
GO:0042491 "GO:0042491" "inner ear auditory receptor cell differentiation" "1/160" "36/20505" 0.245915382193472 0.372888798815918 0.287575599050837 "ENSG00000198719" 1
GO:0042759 "GO:0042759" "long-chain fatty acid biosynthetic process" "1/160" "36/20505" 0.245915382193472 0.372888798815918 0.287575599050837 "ENSG00000179148" 1
GO:0043114 "GO:0043114" "regulation of vascular permeability" "1/160" "36/20505" 0.245915382193472 0.372888798815918 0.287575599050837 "ENSG00000148926" 1
GO:0045940 "GO:0045940" "positive regulation of steroid metabolic process" "1/160" "36/20505" 0.245915382193472 0.372888798815918 0.287575599050837 "ENSG00000160179" 1
GO:0046131 "GO:0046131" "pyrimidine ribonucleoside metabolic process" "1/160" "36/20505" 0.245915382193472 0.372888798815918 0.287575599050837 "ENSG00000158825" 1
GO:0050685 "GO:0050685" "positive regulation of mRNA processing" "1/160" "36/20505" 0.245915382193472 0.372888798815918 0.287575599050837 "ENSG00000188816" 1
GO:0060416 "GO:0060416" "response to growth hormone" "1/160" "36/20505" 0.245915382193472 0.372888798815918 0.287575599050837 "ENSG00000126561" 1
GO:0070229 "GO:0070229" "negative regulation of lymphocyte apoptotic process" "1/160" "36/20505" 0.245915382193472 0.372888798815918 0.287575599050837 "ENSG00000131203" 1
GO:0070670 "GO:0070670" "response to interleukin-4" "1/160" "36/20505" 0.245915382193472 0.372888798815918 0.287575599050837 "ENSG00000125931" 1
GO:0099068 "GO:0099068" "postsynapse assembly" "1/160" "36/20505" 0.245915382193472 0.372888798815918 0.287575599050837 "ENSG00000114251" 1
GO:1901797 "GO:1901797" "negative regulation of signal transduction by p53 class mediator" "1/160" "36/20505" 0.245915382193472 0.372888798815918 0.287575599050837 "ENSG00000019549" 1
GO:1903523 "GO:1903523" "negative regulation of blood circulation" "1/160" "36/20505" 0.245915382193472 0.372888798815918 0.287575599050837 "ENSG00000148926" 1
GO:1905332 "GO:1905332" "positive regulation of morphogenesis of an epithelium" "1/160" "36/20505" 0.245915382193472 0.372888798815918 0.287575599050837 "ENSG00000273706" 1
GO:0048661 "GO:0048661" "positive regulation of smooth muscle cell proliferation" "2/160" "122/20505" 0.246442313514517 0.37310753987058 0.287744294356331 "ENSG00000160712/ENSG00000102678" 2
GO:0051928 "GO:0051928" "positive regulation of calcium ion transport" "2/160" "122/20505" 0.246442313514517 0.37310753987058 0.287744294356331 "ENSG00000103888/ENSG00000134817" 2
GO:1903509 "GO:1903509" "liposaccharide metabolic process" "2/160" "122/20505" 0.246442313514517 0.37310753987058 0.287744294356331 "ENSG00000105855/ENSG00000148488" 2
GO:0071241 "GO:0071241" "cellular response to inorganic substance" "3/160" "221/20505" 0.248546033407914 0.376097851897645 0.290050453123402 "ENSG00000164690/ENSG00000165140/ENSG00000114251" 3
GO:0007613 "GO:0007613" "memory" "2/160" "123/20505" 0.249329359909872 0.377088096037422 0.290814139382167 "ENSG00000100678/ENSG00000183454" 2
GO:0002507 "GO:0002507" "tolerance induction" "1/160" "37/20505" 0.251809834235538 0.37849114344242 0.29189618367867 "ENSG00000131203" 1
GO:0006101 "GO:0006101" "citrate metabolic process" "1/160" "37/20505" 0.251809834235538 0.37849114344242 0.29189618367867 "ENSG00000126561" 1
GO:0010742 "GO:0010742" "macrophage derived foam cell differentiation" "1/160" "37/20505" 0.251809834235538 0.37849114344242 0.29189618367867 "ENSG00000160179" 1
GO:0014808 "GO:0014808" "release of sequestered calcium ion into cytosol by sarcoplasmic reticulum" "1/160" "37/20505" 0.251809834235538 0.37849114344242 0.29189618367867 "ENSG00000183023" 1
GO:0016572 "GO:0016572" "histone phosphorylation" "1/160" "37/20505" 0.251809834235538 0.37849114344242 0.29189618367867 "ENSG00000105146" 1
GO:0030224 "GO:0030224" "monocyte differentiation" "1/160" "37/20505" 0.251809834235538 0.37849114344242 0.29189618367867 "ENSG00000157368" 1
GO:0032692 "GO:0032692" "negative regulation of interleukin-1 production" "1/160" "37/20505" 0.251809834235538 0.37849114344242 0.29189618367867 "ENSG00000142405" 1
GO:0046640 "GO:0046640" "regulation of alpha-beta T cell proliferation" "1/160" "37/20505" 0.251809834235538 0.37849114344242 0.29189618367867 "ENSG00000110944" 1
GO:0048384 "GO:0048384" "retinoic acid receptor signaling pathway" "1/160" "37/20505" 0.251809834235538 0.37849114344242 0.29189618367867 "ENSG00000128918" 1
GO:0090077 "GO:0090077" "foam cell differentiation" "1/160" "37/20505" 0.251809834235538 0.37849114344242 0.29189618367867 "ENSG00000160179" 1
GO:1903131 "GO:1903131" "mononuclear cell differentiation" "1/160" "37/20505" 0.251809834235538 0.37849114344242 0.29189618367867 "ENSG00000157368" 1
GO:1903539 "GO:1903539" "protein localization to postsynaptic membrane" "1/160" "37/20505" 0.251809834235538 0.37849114344242 0.29189618367867 "ENSG00000183454" 1
GO:0017015 "GO:0017015" "regulation of transforming growth factor beta receptor signaling pathway" "2/160" "124/20505" 0.252217506971027 0.378909197683746 0.292218591322093 "ENSG00000125931/ENSG00000168675" 2
GO:0018210 "GO:0018210" "peptidyl-threonine modification" "2/160" "125/20505" 0.255106563035997 0.382856181057102 0.295262544671298 "ENSG00000103888/ENSG00000114251" 2
GO:0031623 "GO:0031623" "receptor internalization" "2/160" "125/20505" 0.255106563035997 0.382856181057102 0.295262544671298 "ENSG00000148926/ENSG00000154342" 2
GO:0050890 "GO:0050890" "cognition" "4/160" "330/20505" 0.257431375348175 0.383732740990203 0.295938556524338 "ENSG00000157680/ENSG00000165186/ENSG00000100678/ENSG00000183454" 4
GO:0000266 "GO:0000266" "mitochondrial fission" "1/160" "38/20505" 0.257658496856327 0.383732740990203 0.295938556524338 "ENSG00000128052" 1
GO:0001662 "GO:0001662" "behavioral fear response" "1/160" "38/20505" 0.257658496856327 0.383732740990203 0.295938556524338 "ENSG00000181195" 1
GO:0002209 "GO:0002209" "behavioral defense response" "1/160" "38/20505" 0.257658496856327 0.383732740990203 0.295938556524338 "ENSG00000181195" 1
GO:0008207 "GO:0008207" "C21-steroid hormone metabolic process" "1/160" "38/20505" 0.257658496856327 0.383732740990203 0.295938556524338 "ENSG00000148926" 1
GO:0014072 "GO:0014072" "response to isoquinoline alkaloid" "1/160" "38/20505" 0.257658496856327 0.383732740990203 0.295938556524338 "ENSG00000181195" 1
GO:0032365 "GO:0032365" "intracellular lipid transport" "1/160" "38/20505" 0.257658496856327 0.383732740990203 0.295938556524338 "ENSG00000160179" 1
GO:0043278 "GO:0043278" "response to morphine" "1/160" "38/20505" 0.257658496856327 0.383732740990203 0.295938556524338 "ENSG00000181195" 1
GO:0055090 "GO:0055090" "acylglycerol homeostasis" "1/160" "38/20505" 0.257658496856327 0.383732740990203 0.295938556524338 "ENSG00000009950" 1
GO:0070328 "GO:0070328" "triglyceride homeostasis" "1/160" "38/20505" 0.257658496856327 0.383732740990203 0.295938556524338 "ENSG00000009950" 1
GO:0086010 "GO:0086010" "membrane depolarization during action potential" "1/160" "38/20505" 0.257658496856327 0.383732740990203 0.295938556524338 "ENSG00000183023" 1
GO:1903514 "GO:1903514" "release of sequestered calcium ion into cytosol by endoplasmic reticulum" "1/160" "38/20505" 0.257658496856327 0.383732740990203 0.295938556524338 "ENSG00000183023" 1
GO:2000406 "GO:2000406" "positive regulation of T cell migration" "1/160" "38/20505" 0.257658496856327 0.383732740990203 0.295938556524338 "ENSG00000114251" 1
GO:2000648 "GO:2000648" "positive regulation of stem cell proliferation" "1/160" "38/20505" 0.257658496856327 0.383732740990203 0.295938556524338 "ENSG00000164690" 1
GO:2000727 "GO:2000727" "positive regulation of cardiac muscle cell differentiation" "1/160" "38/20505" 0.257658496856327 0.383732740990203 0.295938556524338 "ENSG00000154342" 1
GO:0034605 "GO:0034605" "cellular response to heat" "2/160" "126/20505" 0.257996339330051 0.383845011465106 0.296025140645874 "ENSG00000101276/ENSG00000168079" 2
GO:1903844 "GO:1903844" "regulation of cellular response to transforming growth factor beta stimulus" "2/160" "126/20505" 0.257996339330051 0.383845011465106 0.296025140645874 "ENSG00000125931/ENSG00000168675" 2
GO:0019935 "GO:0019935" "cyclic-nucleotide-mediated signaling" "3/160" "226/20505" 0.259003349625847 0.38514732976899 0.297029501644605 "ENSG00000173698/ENSG00000148926/ENSG00000134817" 3
GO:0010499 "GO:0010499" "proteasomal ubiquitin-independent protein catabolic process" "1/160" "39/20505" 0.263461723538449 0.389992682869415 0.300766286779723 "ENSG00000240065" 1
GO:0010669 "GO:0010669" "epithelial structure maintenance" "1/160" "39/20505" 0.263461723538449 0.389992682869415 0.300766286779723 "ENSG00000160180" 1
GO:0030810 "GO:0030810" "positive regulation of nucleotide biosynthetic process" "1/160" "39/20505" 0.263461723538449 0.389992682869415 0.300766286779723 "ENSG00000009950" 1
GO:0033003 "GO:0033003" "regulation of mast cell activation" "1/160" "39/20505" 0.263461723538449 0.389992682869415 0.300766286779723 "ENSG00000103241" 1
GO:0046676 "GO:0046676" "negative regulation of insulin secretion" "1/160" "39/20505" 0.263461723538449 0.389992682869415 0.300766286779723 "ENSG00000102362" 1
GO:0050435 "GO:0050435" "amyloid-beta metabolic process" "1/160" "39/20505" 0.263461723538449 0.389992682869415 0.300766286779723 "ENSG00000262655" 1
GO:0051180 "GO:0051180" "vitamin transport" "1/160" "39/20505" 0.263461723538449 0.389992682869415 0.300766286779723 "ENSG00000101276" 1
GO:0071312 "GO:0071312" "cellular response to alkaloid" "1/160" "39/20505" 0.263461723538449 0.389992682869415 0.300766286779723 "ENSG00000183023" 1
GO:1900373 "GO:1900373" "positive regulation of purine nucleotide biosynthetic process" "1/160" "39/20505" 0.263461723538449 0.389992682869415 0.300766286779723 "ENSG00000009950" 1
GO:0042089 "GO:0042089" "cytokine biosynthetic process" "2/160" "128/20505" 0.263777311745675 0.390262335283813 0.300974245438852 "ENSG00000142405/ENSG00000114251" 2
GO:0009206 "GO:0009206" "purine ribonucleoside triphosphate biosynthetic process" "2/160" "129/20505" 0.266668144459598 0.393941577042588 0.303811713757001 "ENSG00000165140/ENSG00000009950" 2
GO:0030316 "GO:0030316" "osteoclast differentiation" "2/160" "129/20505" 0.266668144459598 0.393941577042588 0.303811713757001 "ENSG00000110944/ENSG00000177706" 2
GO:0042107 "GO:0042107" "cytokine metabolic process" "2/160" "129/20505" 0.266668144459598 0.393941577042588 0.303811713757001 "ENSG00000142405/ENSG00000114251" 2
GO:0050727 "GO:0050727" "regulation of inflammatory response" "5/160" "445/20505" 0.267827039652359 0.394427207994117 0.304186237240267 "ENSG00000131203/ENSG00000110944/ENSG00000142405/ENSG00000103241/ENSG00000114251" 5
GO:0010677 "GO:0010677" "negative regulation of cellular carbohydrate metabolic process" "1/160" "40/20505" 0.269219865052856 0.394427207994117 0.304186237240267 "ENSG00000165140" 1
GO:0030204 "GO:0030204" "chondroitin sulfate metabolic process" "1/160" "40/20505" 0.269219865052856 0.394427207994117 0.304186237240267 "ENSG00000107742" 1
GO:0030225 "GO:0030225" "macrophage differentiation" "1/160" "40/20505" 0.269219865052856 0.394427207994117 0.304186237240267 "ENSG00000157368" 1
GO:0032467 "GO:0032467" "positive regulation of cytokinesis" "1/160" "40/20505" 0.269219865052856 0.394427207994117 0.304186237240267 "ENSG00000105146" 1
GO:0042596 "GO:0042596" "fear response" "1/160" "40/20505" 0.269219865052856 0.394427207994117 0.304186237240267 "ENSG00000181195" 1
GO:0045823 "GO:0045823" "positive regulation of heart contraction" "1/160" "40/20505" 0.269219865052856 0.394427207994117 0.304186237240267 "ENSG00000148926" 1
GO:0046633 "GO:0046633" "alpha-beta T cell proliferation" "1/160" "40/20505" 0.269219865052856 0.394427207994117 0.304186237240267 "ENSG00000110944" 1
GO:0060323 "GO:0060323" "head morphogenesis" "1/160" "40/20505" 0.269219865052856 0.394427207994117 0.304186237240267 "ENSG00000134853" 1
GO:0060969 "GO:0060969" "negative regulation of gene silencing" "1/160" "40/20505" 0.269219865052856 0.394427207994117 0.304186237240267 "ENSG00000256453" 1
GO:0071526 "GO:0071526" "semaphorin-plexin signaling pathway" "1/160" "40/20505" 0.269219865052856 0.394427207994117 0.304186237240267 "ENSG00000076356" 1
GO:0072529 "GO:0072529" "pyrimidine-containing compound catabolic process" "1/160" "40/20505" 0.269219865052856 0.394427207994117 0.304186237240267 "ENSG00000158825" 1
GO:0090313 "GO:0090313" "regulation of protein targeting to membrane" "1/160" "40/20505" 0.269219865052856 0.394427207994117 0.304186237240267 "ENSG00000103888" 1
GO:1901890 "GO:1901890" "positive regulation of cell junction assembly" "1/160" "40/20505" 0.269219865052856 0.394427207994117 0.304186237240267 "ENSG00000128052" 1
GO:1901998 "GO:1901998" "toxin transport" "1/160" "40/20505" 0.269219865052856 0.394427207994117 0.304186237240267 "ENSG00000160179" 1
GO:2000273 "GO:2000273" "positive regulation of signaling receptor activity" "1/160" "40/20505" 0.269219865052856 0.394427207994117 0.304186237240267 "ENSG00000163235" 1
GO:0046677 "GO:0046677" "response to antibiotic" "4/160" "337/20505" 0.269438988052146 0.394427207994117 0.304186237240267 "ENSG00000165215/ENSG00000181195/ENSG00000183023/ENSG00000183454" 4
GO:0009145 "GO:0009145" "purine nucleoside triphosphate biosynthetic process" "2/160" "130/20505" 0.269558970523159 0.394427207994117 0.304186237240267 "ENSG00000165140/ENSG00000009950" 2
GO:0019218 "GO:0019218" "regulation of steroid metabolic process" "2/160" "130/20505" 0.269558970523159 0.394427207994117 0.304186237240267 "ENSG00000160179/ENSG00000019549" 2
[truncated: 926 more rows]
