# Supplementary material for: Early anteroposterior regionalisation of human neural crest is shaped by a pro-mesodermal factor
Source: eLife. 2022 Sep 26;11:e74263. doi: 10.7554/eLife.74263 (PMC9536837; doi:10.7554/eLife.74263)
Supplement: Supplementary file 3. [file elife-74263-supp3.xlsx]

## Sheet: Intervals
Sample	Interval	Chromosome	Start	End	Length	Peak Summit	Peak Val	Avg Val	BinCount	CGIslandCount	PromoterCount	GeneCount	Gene List	Dist to Start	Position
hESC	0	1	10055	10267	212	10208	23	21	6	0	1	2	DDX11L1, MIR6859-1	-1666, 7228	upstream, downstream
hESC	1	1	1231890	1232133	243	1232016	29	25.25	8	1	2	2	SDF4, B3GALT6	51, -233	in gene, upstream
hESC	2	1	1307981	1308521	540	1308352	32	25.4706	17	1	2	4	ACAP3, PUSL1, CPSF3L, MIR6727	-427, -219, 16335, 4214	upstream, upstream, downstream, downstream
hESC	3	1	1407143	1407362	219	1407264	21	19.1429	7	1	1	3	CCNL2, LOC148413, MRPL20	-7926, 7734, 570	upstream, downstream, in gene
hESC	4	1	3900018	3901429	1411	3900672	339	121.727	44	1	2	2	C1orf174, LINC01134	-379, 268	upstream, in gene
hESC	5	1	5225667	5226080	413	5225888	28	20.7692	13	0	0	0
hESC	6	1	5687025	5687250	225	5687072	22	18.2857	7	0	0	0
hESC	7	1	6447825	6448027	202	6447904	19	17	6	1	0	1	ESPN	23128	in gene
hESC	8	1	7298167	7298443	276	7298304	27	21.1111	9	0	0	1	CAMTA1	512980	in gene
hESC	9	1	8167008	8167391	383	8167152	73	50.5	12	0	0	0
hESC	10	1	9689194	9689419	225	9689264	31	25.8571	7	1	1	2	PIK3CD, PIK3CD-AS2	59375, -1690	in gene, upstream
hESC	11	1	9714451	9714743	292	9714576	20	16.7778	9	0	0	1	PIK3CD	84687	in gene
hESC	12	1	9929418	9929698	280	9929504	38	29.7778	9	0	0	1	LZIC	13898	in gene
hESC	13	1	10958659	10958903	244	10958784	33	30.4286	7	0	0	1	C1orf127	23253	in gene
hESC	14	1	11682480	11682829	349	11682656	65	46.1818	11	0	1	3	FBXO6, MAD2L2, DRAXIN	18563, 9132, -3991	downstream, in gene, upstream
hESC	15	1	11735904	11736200	296	11736000	37	28.9	10	1	1	1	AGTRAP	526	in gene
hESC	16	1	11805963	11806400	437	11806176	118	77.5714	14	1	2	2	MTHFR, CLCN6	-73, 80	upstream, in gene
hESC	17	1	12078815	12079109	294	12078944	45	34.5	10	0	0	1	TNFRSF8	15614	in gene
hESC	18	1	12629694	12629911	217	12629760	38	31.4286	7	0	0	0
hESC	19	1	13585703	13585905	202	13585808	20	18.6667	6	0	1	1	PDPN	2051	in gene
hESC	20	1	14136272	14136549	277	14136416	18	14.6667	9	0	0	1	KAZN	242901	in gene
hESC	21	1	16116024	16116233	209	16116096	23	19.5714	7	0	0	1	EPHA2	39991	downstream
hESC	22	1	16366874	16367215	341	16367024	122	82.4545	11	1	1	1	SZRD1	-6	upstream
hESC	23	1	16700328	16700729	401	16700480	23	18.8333	12	1	0	0
hESC	24	1	16875141	16875363	222	16875280	38	31.5714	7	0	0	1	TRE-TTC3-1	2697	downstream
hESC	25	1	18294838	18295072	234	18295008	29	24	8	0	0	1	IGSF21	187262	in gene
hESC	26	1	18298346	18298595	249	18298464	46	37.125	8	0	0	1	IGSF21	190718	in gene
hESC	27	1	18480803	18481028	225	18480896	29	25.7143	7	0	1	1	KLHDC7A	-34	upstream
hESC	28	1	19210229	19210438	209	19210304	23	21.1429	7	1	2	3	UBR4, LOC101927895, EMC1	15, -61, 41255	in gene, upstream, downstream
hESC	29	1	22451705	22451974	269	22451808	36	28.7778	9	1	0	1	ZBTB40	22970	in gene
hESC	30	1	23903905	23904115	210	23904032	21	18	6	0	0	1	CNR2	9295	in gene
hESC	31	1	23959652	23960059	407	23959840	51	40.4167	12	1	2	3	LOC105376862, PNRC2, SRSF10	-699, 29, 20623	upstream, in gene, downstream
hESC	32	1	24464495	24464740	245	24464624	30	24.75	8	0	0	1	NIPAL3	50950	in gene
hESC	33	1	26900284	26900540	256	26900416	36	29.875	8	1	1	2	GPN2, GPATCH3	-10038, 649	upstream, in gene
hESC	34	1	27234427	27234651	224	27234528	30	25.8571	7	1	2	2	LOC105376890, WDTC1	-34, 12	upstream, in gene
hESC	35	1	27914649	27915016	367	27914784	48	38.5833	12	1	1	1	RPA2	13	in gene
hESC	36	1	28232842	28233180	338	28232992	52	36.5	10	1	2	4	DNAJC8, ATPIF1, LOC105376896, LOC105376895	39, -3099, 14332, 8384	in gene, upstream, downstream, downstream
hESC	37	1	28736154	28736924	770	28736576	255	126.25	24	1	1	1	YTHDF2	-45	upstream
hESC	38	1	32240269	32240740	471	32240448	73	45.6667	15	1	1	2	EIF3I, FAM167B	18581, -6769	downstream, upstream
hESC	39	1	32248390	32248790	400	32248512	17	15.1667	12	0	2	2	FAM167B, LCK	1295, -2727	in gene, upstream
hESC	40	1	32350964	32351166	202	32351072	27	24.8333	6	1	1	1	LOC105378629	723	in gene
hESC	41	1	32736840	32737050	210	32736912	29	26.3333	6	0	1	1	KIAA1522	-4999	upstream
hESC	42	1	33342300	33342604	304	33342400	33	23.8	10	0	0	3	PHC2, MIR3605, LOC101929464	88210, -9908, -7952	in gene, upstream, upstream
hESC	43	1	35557480	35557782	302	35557696	34	27.7778	9	1	2	2	KIAA0319L, NCDN	-26, -96	upstream, upstream
hESC	44	1	36321457	36321742	285	36321600	28	23.7778	9	1	1	2	SH3D21, EVA1B	15874, 2554	in gene, downstream
hESC	45	1	36771257	36771557	300	36771408	39	29.1	10	0	0	0
hESC	46	1	36975726	36975961	235	36975808	23	19.2857	7	0	0	1	GRIK3	58740	in gene
hESC	47	1	38859775	38859997	222	38859888	41	34.7143	7	1	2	4	RRAGC, LOC105378663, GJA9-MYCBP, MYCBP	-65, -30, 21738, 13490	upstream, upstream, downstream, downstream
hESC	48	1	38953601	38953841	240	38953680	28	23	7	0	0	0
hESC	49	1	39409623	39409858	235	39409728	22	18.375	8	1	1	2	MACF1, KIAA0754	328311, 224	in gene, in gene
hESC	50	1	40144022	40144344	322	40144192	37	27.5	10	0	0	1	LOC105378671	17120	downstream
hESC	51	1	40773683	40773947	264	40773824	41	34.875	8	0	0	1	NFYC	82254	downstream
hESC	52	1	40862290	40862572	282	40862448	31	25.6667	9	1	2	2	LOC105378676, CITED4	-4954, -102	upstream, upstream
hESC	53	1	43008688	43009007	319	43008800	60	46.4	10	0	0	0
hESC	54	1	43660453	43660732	279	43660576	67	53.875	8	0	0	1	KDM4A	10450	in gene
hESC	55	1	43974710	43975015	305	43974880	41	31.7	10	1	2	4	IPO13, DPH2, ATP6V0B, B4GALT2	28074, 4899, 232, -4322	downstream, downstream, in gene, upstream
hESC	56	1	44543303	44543558	255	44543392	42	34.875	8	0	1	2	RNF220, MIR5584	138609, -2101	in gene, upstream
hESC	57	1	45012050	45012294	244	45012160	43	35	8	0	2	3	HECTD3, UROD, ZSWIM5	-805, 27, 194418	upstream, in gene, downstream
hESC	58	1	45499744	45500381	637	45500000	122	74.4	20	1	2	4	TESK2, CCDC163P, MMACHC, LOC105378692	-8658, 79, -184, 4329	upstream, in gene, upstream, downstream
hESC	59	1	46303224	46303545	321	46303424	48	39	10	1	2	2	LRRC41, UQCRH	-58, -189	upstream, upstream
hESC	60	1	46719159	46719370	211	46719200	17	15.7143	7	1	1	1	EFCAB14	-136	upstream
hESC	61	1	52842628	52843000	372	52842859	15	14.1818	11	1	1	1	ZYG11A	348	in gene
hESC	62	1	54407562	54407884	322	54407728	45	34.8	10	0	0	1	SSBP3	5757	in gene
hESC	63	1	54488277	54488599	322	54488384	36	28.2	10	1	0	0
hESC	64	1	54962701	54962903	202	54962752	21	19.8333	6	0	1	1	TRNAK-CUU	-4811	upstream
hESC	65	1	56550084	56550436	352	56550336	32	24.8182	11	0	0	1	PPAP2B	29248	in gene
hESC	66	1	60849467	60849762	295	60849632	33	25.2	10	0	0	0
hESC	67	1	62181626	62181866	240	62181744	35	28.375	8	0	0	0
hESC	68	1	62211032	62211574	542	62211232	19	17.0588	17	0	0	1	L1TD1	16430	in gene
hESC	69	1	62213106	62213683	577	62213280	30	21.7778	18	0	0	1	L1TD1	18478	downstream
hESC	70	1	62401147	62401398	251	62401248	30	23.375	8	0	1	1	LOC105378767	-5742	upstream
hESC	71	1	63189726	63190022	296	63189888	37	29	10	0	1	3	LINC00466, LOC105378770, RNA5SP49	127342, 16740, -3438	in gene, in gene, upstream
hESC	72	1	63299425	63299647	222	63299488	19	17.5	6	0	0	1	LINC00466	17742	in gene
hESC	73	1	63775159	63775487	328	63775296	57	42.8	10	1	1	1	ROR1	1277	in gene
hESC	74	1	63783052	63783334	282	63783200	42	34.7778	9	0	0	1	ROR1	9181	in gene
hESC	75	1	64472973	64473235	262	64473072	44	35.75	8	0	1	1	CACHD1	2279	in gene
hESC	76	1	64493895	64494136	241	64494080	21	18.7143	7	0	0	1	CACHD1	23287	in gene
hESC	77	1	65026227	65026611	384	65026336	41	31.8333	12	0	0	0
hESC	78	1	66995938	66996348	410	66996128	97	66.1667	12	0	0	2	MIER1, SLC35D1	71233, 58269	downstream, downstream
hESC	79	1	67459109	67459384	275	67459200	33	28.5	8	0	0	0
hESC	80	1	69244358	69244582	224	69244432	40	32.2857	7	0	0	1	LOC105378786	5055	in gene
hESC	81	1	70410637	70411273	636	70411040	88	55.75	20	1	1	1	CTH	-178	upstream
hESC	82	1	71462357	71462646	289	71462464	40	29.6667	9	0	0	1	NEGR1	820383	in gene
hESC	83	1	74245232	74245481	249	74245328	29	24	8	0	0	2	FPGT-TNNI3K, TNNI3K	47116, 9941	in gene, in gene
hESC	84	1	77682661	77683043	382	77682784	48	37.75	12	1	1	1	ZZZ3	642	in gene
hESC	85	1	79193399	79193634	235	79193504	30	24.5	8	0	0	0
hESC	86	1	83693007	83693209	202	83693072	29	25.8333	6	0	0	1	LOC101927587	167924	in gene
hESC	87	1	90561901	90562231	330	90562080	59	43.2	10	0	0	0
hESC	88	1	91104707	91105028	321	91104832	38	29	10	0	0	0
hESC	89	1	93079080	93079307	227	93079136	37	31.8571	7	1	1	1	MTF2	-99	upstream
hESC	90	1	96060756	96060958	202	96060896	21	18.5	6	0	0	0
hESC	91	1	100132800	100133185	385	100133104	29	23.8462	13	1	2	2	SASS6, TRMT13	-9, -43	upstream, upstream
hESC	92	1	101843174	101843471	297	101843296	33	25.5556	9	0	0	1	OLFM3	153938	in gene
hESC	93	1	108876859	108877092	233	108877024	20	17.125	8	1	1	1	GPSM2	1674	in gene
hESC	94	1	109229769	109230122	353	109229952	56	39.2727	11	0	0	1	SARS	16059	in gene
hESC	95	1	109240838	109241088	250	109240912	22	17.375	8	0	0	2	SARS, CELSR2	27019, -8803	downstream, upstream
hESC	96	1	110034338	110034728	390	110034496	121	75.8333	12	1	1	2	STRIP1, LOC105378895	2919, 1015	in gene, in gene
hESC	97	1	111449257	111449469	212	111449344	30	25.8333	6	1	2	2	WDR77, ATP5F1	-136, 223	upstream, in gene
hESC	98	1	112817918	112818298	380	112818080	56	40.0833	12	0	0	1	LINC01356	32563	downstream
hESC	99	1	113027564	113027835	271	113027680	23	19.25	8	0	0	1	LOC100996251	45422	in gene
hESC	100	1	113929362	113929583	221	113929376	24	20.7143	7	1	2	2	HIPK1-AS1, HIPK1	149, 179	in gene, in gene
hESC	101	1	114088670	114088916	246	114088736	21	18.5	8	0	0	1	SYT6	65114	downstream
hESC	102	1	117346668	117346932	264	117346800	16	14.25	8	0	0	0
hESC	103	1	118988354	118988709	355	118988512	26	20.3636	11	0	1	1	TBX15	1044	in gene
hESC	104	1	147172409	147172646	237	147172576	26	22.875	8	1	1	1	PRKAB2	13	in gene
hESC	105	1	147837225	147837434	209	147837344	27	23	6	0	0	0
hESC	106	1	151716855	151717114	259	151716976	62	50.5	8	0	2	2	CELF3, RIIAD1	-155, -4561	upstream, upstream
hESC	107	1	153633990	153634221	231	153634096	27	24.8571	7	1	2	3	S100A13, S100A1, CHTOP	-4, 5699, 114	upstream, downstream, in gene
hESC	108	1	153745549	153745760	211	153745616	38	32.2857	7	0	0	1	INTS3	17566	in gene
hESC	109	1	153990515	153990806	291	153990640	73	59.8889	9	1	2	3	RAB13, RPS27, NUP210L	-4263, -123, 164476	upstream, upstream, downstream
hESC	110	1	154183374	154183576	202	154183456	47	40.3333	6	1	0	1	TPM3	8679	in gene
hESC	111	1	154558738	154559042	304	154558880	63	48.1	10	1	1	3	UBE2Q1, UBE2Q1-AS1, CHRNB2	-236, 5271, -8901	upstream, downstream, upstream
hESC	112	1	154567823	154568027	204	154567888	14	12.8333	6	1	1	2	UBE2Q1, CHRNB2	-9244, 107	upstream, in gene
hESC	113	1	154962218	154962509	291	154962336	19	15	9	1	3	4	PBXIP1, PYGO2, LOC101928120, SHC1	-6245, -554, 776, 12156	upstream, upstream, in gene, in gene
hESC	114	1	155080922	155081216	294	155081088	60	44	10	1	1	1	EFNA3	2216	in gene
hESC	115	1	155166018	155166405	387	155166144	27	21.3333	12	0	1	2	KRTCAP2, TRIM46	7184, -7643	downstream, upstream
hESC	116	1	155218832	155219287	455	155219040	143	84.7857	14	0	0	2	THBS3, MTX1	-9860, 10341	upstream, downstream
hESC	117	1	155219530	155219887	357	155219680	88	61	11	0	0	1	MTX1	10981	downstream
hESC	118	1	155241090	155241500	410	155241280	172	110.5	12	0	0	2	GBA, FAM189B	3582, 14203	in gene, downstream
hESC	119	1	155262171	155262644	473	155262496	39	29.4	15	1	2	3	FAM189B, SCAMP3, CLK2	-7013, -62, 11033	upstream, upstream, downstream
hESC	120	1	155934476	155934701	225	155934560	40	33.8571	7	1	2	3	KIAA0907, SCARNA4, RXFP4	-118, -8474, -7129	upstream, upstream, upstream
hESC	121	1	156082470	156082742	272	156082560	41	31.625	8	1	2	2	MEX3A, LMNA	-562, 14	upstream, in gene
hESC	122	1	156282755	156283068	313	156282928	35	26.7778	9	1	2	3	SMG5, TMEM79, GLMP	-43, 15, 12761	upstream, in gene, downstream
hESC	123	1	156295475	156295860	385	156295648	56	40.3333	12	0	1	3	TMEM79, GLMP, VHLL	12735, 41, 3989	downstream, in gene, downstream
hESC	124	1	156706115	156706463	348	156706304	28	22	10	1	1	2	CRABP2, LOC105371454	-488, 6870	upstream, downstream
hESC	125	1	159071874	159072295	421	159072096	89	57.6154	13	0	0	1	AIM2	4799	in gene
hESC	126	1	160169516	160169856	340	160169696	125	83.6364	11	0	0	1	ATP1A4	18134	in gene
hESC	127	1	161021248	161021530	282	161021376	34	27.4444	9	1	2	2	F11R, LOC105369141	-33, -373	upstream, upstream
hESC	128	1	161045841	161046429	588	161046080	144	91.3333	18	0	2	3	TSTD1, USF1, ARHGAP30	-7096, -101, 23891	upstream, upstream, downstream
hESC	129	1	161132536	161133023	487	161132768	66	49.8667	15	0	1	2	NIT1, DEDD	14696, 15	downstream, in gene
hESC	130	1	161153877	161154179	302	161154000	42	34	10	0	2	2	UFC1, USP21	256, -5464	in gene, upstream
hESC	131	1	161202139	161202402	263	161202272	44	36.2222	9	1	1	2	ADAMTS4, NDUFS2	-3217, 4853	upstream, in gene
hESC	132	1	161220810	161221016	206	161220864	32	26.6667	6	0	2	6	NDUFS2, FCER1G, APOA2, TOMM40L, MIR5187, NR1I3	23445, 5567, 2764, -5075, -6322, 17734	downstream, downstream, downstream, upstream, upstream, downstream
hESC	133	1	161225905	161226200	295	161226048	41	32.8889	9	0	3	5	FCER1G, APOA2, TOMM40L, MIR5187, NR1I3	10751, -2420, 109, -1138, 12550	downstream, upstream, in gene, upstream, downstream
hESC	134	1	162092008	162092272	264	162092128	24	19.625	8	0	0	1	NOS1AP	22337	in gene
hESC	135	1	163400063	163400334	271	163400176	53	40	9	0	0	0
hESC	136	1	166383204	166383556	352	166383392	30	23	11	0	0	0
hESC	137	1	167820157	167820419	262	167820272	24	19.5556	9	1	0	1	ADCY10	95254	in gene
hESC	138	1	167936255	167936691	436	167936480	33	25.8571	14	1	2	2	MPC2, DCAF6	589, -79	in gene, upstream
hESC	139	1	169893893	169894317	424	169894080	83	56.9231	13	1	1	1	SCYL3	187	in gene
hESC	140	1	170146002	170146239	237	170146080	46	42	7	0	2	3	METTL11B, MIR3119-1, MIR3119-2	33, 5382, -5298	in gene, downstream, upstream
hESC	141	1	170487626	170487856	230	170487712	30	26	7	0	0	1	LOC101928650	44897	in gene
hESC	142	1	171432225	171432454	229	171432256	20	16	7	0	0	0
hESC	143	1	172278650	172278870	220	172278736	37	31.8571	7	0	0	1	DNM3	437258	in gene
hESC	144	1	175130005	175130296	291	175130128	43	33.2222	9	0	0	1	TNN	62270	in gene
hESC	145	1	175808696	175808898	202	175808800	19	16.7143	7	0	0	0
hESC	146	1	175918549	175918751	202	175918592	21	18.3333	6	0	0	0
hESC	147	1	178581343	178581636	293	178581472	29	22.7	10	0	1	1	LOC105371632	-1296	upstream
hESC	148	1	179954515	179954809	294	179954656	60	47.4444	9	1	2	2	LOC101928933, CEP350	15, -117	in gene, upstream
hESC	149	1	181969787	181970321	534	181970080	62	32.2941	17	0	0	0
hESC	150	1	185912586	185912854	268	185912688	36	31.125	8	0	0	1	HMCN1	178307	in gene
hESC	151	1	193741280	193741579	299	193741408	42	32.1	10	0	0	0
hESC	152	1	198701726	198702045	319	198701856	51	37.9	10	0	0	1	PTPRC	62888	in gene
hESC	153	1	201154588	201154901	313	201154688	33	25.7	10	1	0	1	TMEM9	16894	in gene
hESC	154	1	202010439	202010654	215	202010592	39	36.1667	6	0	2	4	RNPEP, LOC102723465, MIR6740, ELF3	27954, -546, 7468, 73	downstream, upstream, downstream, in gene
hESC	155	1	202927091	202927567	476	202927296	71	45.1333	15	1	1	1	KLHL12	1348	in gene
hESC	156	1	203307848	203308089	241	203307904	41	33	7	0	2	2	LINC01136, BTG2	-2579, 2368	upstream, in gene
hESC	157	1	203519413	203519616	203	203519552	32	27.7143	7	0	1	1	LOC105371688	-5781	upstream
hESC	158	1	204710346	204710655	309	204710432	38	31	9	0	1	3	RNA5SP75, LOC105371693, LOC105371695	-3002, 4682, 15774	upstream, in gene, downstream
hESC	159	1	205448574	205448808	234	205448672	24	20.75	8	0	3	5	LEMD1, BLACAT1, LOC105371697, MIR135B, LOC284577	1278, 7414, 7279, -274, -7250	in gene, in gene, in gene, upstream, upstream
hESC	160	1	206470650	206471241	591	206470944	102	57.6842	19	0	2	3	SRGAP2, IKBKE, MIR6769B	267480, 701, -3859	downstream, in gene, upstream
hESC	161	1	209157601	209157997	396	209157760	55	40	12	0	1	1	LOC100509303	-3151	upstream
hESC	162	1	209576845	209577088	243	209576944	27	21.75	8	0	1	2	LOC105372899, CAMK1G	-9142, -6756	upstream, upstream
hESC	163	1	212284808	212285171	363	212284960	22	18.2727	11	1	2	2	LOC101929541, PPP2R5A	61, -577	in gene, upstream
hESC	164	1	212852176	212852386	210	212852224	34	26.8571	7	0	2	3	SPATA45, FLVCR1-AS1, FLVCR1	-4575, 5914, -6031	upstream, downstream, upstream
hESC	165	1	213231995	213232275	280	213232128	61	47	9	0	0	1	RPS6KC1	180895	in gene
hESC	166	1	214316677	214316912	235	214316768	39	31.5714	7	0	0	1	SMYD2	35546	in gene
hESC	167	1	214683697	214683899	202	214683776	20	16.8333	6	0	0	0
hESC	168	1	217369640	217369984	344	217369760	16	14.0909	11	0	0	0
hESC	169	1	220094162	220094386	224	220094272	31	24	7	1	2	2	BPNT1, IARS2	-4345, 159	upstream, in gene
hESC	170	1	222712533	222713395	862	222713184	105	60.5185	27	1	2	2	AIDA, BROX	-283, 631	upstream, in gene
hESC	171	1	223018560	223018796	236	223018560	22	19.625	8	0	0	0
hESC	172	1	223378916	223379141	225	223379008	21	17.8571	7	0	0	1	LOC105373025	14201	in gene
hESC	173	1	229694362	229694622	260	229694451	22	21.375	8	0	0	0
hESC	174	1	230277512	230277733	221	230277600	26	22.8571	7	0	0	1	GALNT2	219811	in gene
hESC	175	1	232110795	232111053	258	232110880	34	28.75	8	0	0	0
hESC	176	1	232281004	232281245	241	232281088	32	27.7143	7	0	0	0
hESC	177	1	234913763	234914006	243	234913872	32	26.8571	7	0	0	0
hESC	178	1	242586114	242586511	397	242586240	25	18.9167	12	0	0	0
hESC	179	1	244652752	244653005	253	244652864	28	22.75	8	1	1	1	DESI2	-184	upstream
hESC	180	1	245672816	245673648	832	245673088	140	83.1538	26	1	0	2	KIF26B, LOC105379284	518103, 5501	in gene, in gene
hESC	181	1	248826014	248826282	268	248826144	63	49.8889	9	1	2	2	SH3BP5L, MIR3124	-189, -233	upstream, upstream
hESC	182	1	248905948	248906294	346	248906112	36	29.4545	11	1	0	1	PGBD2	33262	in gene
hESC	183	10	6803426	6803628	202	6803520	19	16.6667	6	0	0	1	LINC00707	23922	in gene
hESC	184	10	7412459	7412770	311	7412624	34	28.4	10	1	1	1	SFMBT2	-1138	upstream
hESC	185	10	13348433	13348690	257	13348576	21	16.75	8	1	1	1	SEPHS1	-278	upstream
hESC	186	10	13351431	13351658	227	13351488	36	32.5714	7	0	1	1	SEPHS1	-3190	upstream
hESC	187	10	14674400	14674608	208	14674464	24	20.8571	7	0	0	1	FAM107B	100433	in gene
hESC	188	10	14952887	14953138	251	14953056	29	25.125	8	0	2	2	DCLRE1C, MEIG1	1376, -1172	in gene, upstream
hESC	189	10	15473037	15473293	256	15473184	36	30.25	8	0	0	0
hESC	190	10	16386981	16387217	236	16387120	34	29.1429	7	0	0	0
hESC	191	10	19119242	19119445	203	19119360	34	31	6	0	0	1	MALRD1	72429	in gene
hESC	192	10	20209086	20209408	322	20209248	19	15.2727	11	0	0	1	PLXDC2	393021	in gene
hESC	193	10	20370454	20370656	202	20370496	17	14.8571	7	0	0	0
hESC	194	10	20615103	20615320	217	20615168	28	25.4286	7	0	0	1	LOC105376442	18038	downstream
hESC	195	10	21282042	21282363	321	21282176	81	61.8	10	0	0	0
hESC	196	10	22280129	22280467	338	22280272	47	33.7	10	0	0	0
hESC	197	10	24433707	24433960	253	24433840	20	16.5	8	0	0	1	KIAA1217	739094	in gene
hESC	198	10	25766629	25766912	283	25766720	63	46.6667	9	0	0	0
hESC	199	10	26214145	26214350	205	26214261	29	27.6667	6	0	1	2	MYO3A, GAD2	280188, -2046	downstream, upstream
hESC	200	10	27154278	27154557	279	27154416	29	25.25	8	1	2	2	YME1L1, MASTL	862, -408	in gene, upstream
hESC	201	10	30522683	30522892	209	30522768	22	18.7143	7	0	1	1	LOC105376478	-6789	upstream
hESC	202	10	30597206	30597440	234	30597312	21	17.5	8	0	0	2	LOC105376479, LYZL2	9595, 32450	downstream, downstream
hESC	203	10	31928754	31929024	270	31928912	18	15.2222	9	1	1	1	ARHGAP12	-36	upstream
hESC	204	10	32346415	32346694	279	32346560	30	25.7778	9	1	1	2	EPC1, LOC102031319	32238, -804	in gene, upstream
hESC	205	10	33096156	33096484	328	33096288	37	27.2727	11	0	0	1	LOC101929447	20518	in gene
hESC	206	10	34427339	34427609	270	34427504	28	23.625	8	0	0	1	PARD3	387821	in gene
hESC	207	10	36725724	36725926	202	36725776	17	14.5714	7	0	0	0
hESC	208	10	43306267	43306469	202	43306336	23	18.2857	7	0	0	0
hESC	209	10	44233678	44233919	241	44233792	27	23.4286	7	0	0	0
hESC	210	10	44371009	44371284	275	44371168	31	24.25	8	0	0	1	CXCL12	13929	in gene
hESC	211	10	45470283	45470511	228	45470336	24	20.7143	7	0	0	2	MARCH8, LOC105378286	124570, 6061	in gene, in gene
hESC	212	10	45594716	45595148	432	45594880	126	71.6429	14	1	1	1	MARCH8	26	in gene
hESC	213	10	45726944	45727447	503	45727264	65	39.25	16	1	2	2	FAM21FP, FAM21C	-101, 64	upstream, in gene
hESC	214	10	49690115	49690516	401	49690336	45	32.6667	12	0	0	1	C10orf53	10698	in gene
hESC	215	10	50067633	50068141	508	50067808	72	50.125	16	1	1	1	FAM21A	-80	upstream
hESC	216	10	51910292	51910512	220	51910400	28	24.4286	7	0	0	1	PRKG1	919249	in gene
hESC	217	10	51915005	51915248	243	51915168	22	18.625	8	0	0	1	PRKG1	924017	in gene
hESC	218	10	52903563	52903765	202	52903664	18	16.8333	6	0	0	0
hESC	219	10	52923554	52923847	293	52923728	27	22.1111	9	0	0	0
hESC	220	10	53597768	53598043	275	53597872	22	19.5	8	0	0	0
hESC	221	10	55822131	55822399	268	55822272	32	26	8	0	0	0
hESC	222	10	60003634	60003963	329	60003808	45	33.4	10	0	0	0
hESC	223	10	63713323	63713640	317	63713440	63	46.7	10	0	0	0
hESC	224	10	65273112	65273316	204	65273248	33	26.7143	7	0	0	0
hESC	225	10	66892969	66893237	268	66893056	22	17.875	8	0	0	2	CTNNA3, LOC101928961	870554, 119097	in gene, downstream
hESC	226	10	68331733	68332058	325	68331904	34	27.9	10	1	2	3	PBLD, HNRNPH3, RUFY2	1024, -107, 75390	in gene, upstream, downstream
hESC	227	10	69124050	69124297	247	69124160	32	26.125	8	1	1	1	VPS26A	8	in gene
hESC	228	10	69801165	69801804	639	69801344	34	22.1	20	1	1	2	COL13A1, LOC105378347	-519, 19543	upstream, downstream
hESC	229	10	69867838	69868068	230	69867936	30	24.5	8	0	0	1	COL13A1	66073	in gene
hESC	230	10	70455381	70455623	242	70455488	40	33.5	8	0	1	1	PALD1	-3057	upstream
hESC	231	10	71344643	71344894	251	71344789	33	30.4286	7	0	0	2	SLC29A3, LOC105378353	25536, 3737	in gene, in gene
hESC	232	10	72273696	72273982	286	72273824	32	28.2222	9	1	1	1	DDIT4	-95	upstream
hESC	233	10	72756996	72757236	240	72757109	23	21.1429	7	0	0	1	MCU	64978	in gene
hESC	234	10	73247270	73247485	215	73247424	37	33.5	6	1	3	6	FAM149B1, DNAJC9, DNAJC9-AS1, MRPS16, LOC101929112, CFAP70	79329, -93, 57, 5269, -4198, 113640	downstream, upstream, in gene, downstream, upstream, downstream
hESC	235	10	73495955	73496344	389	73496128	43	29.1667	12	1	2	3	PPP3CB, PPP3CB-AS1, USP54	-104, 376, 95214	upstream, in gene, downstream
hESC	236	10	76178209	76178432	223	76178304	26	21.4286	7	0	0	1	C10orf11	746846	in gene
hESC	237	10	76231371	76231655	284	76231520	45	36.1111	9	0	0	1	C10orf11	800062	in gene
hESC	238	10	84139132	84139463	331	84139328	39	29	11	1	1	1	GHITM	-101	upstream
hESC	239	10	85407153	85407355	202	85407264	19	16.1667	6	0	0	0
hESC	240	10	85667853	85668055	202	85667936	25	21	6	0	0	1	GRID1	698557	in gene
hESC	241	10	90319596	90319889	293	90319744	39	29.6667	9	0	0	0
hESC	242	10	90805351	90805579	228	90805440	18	15.7143	7	0	0	1	HTR7	52474	in gene
hESC	243	10	90925576	90925896	320	90925728	57	40.9	10	0	1	1	ANKRD1	-4453	upstream
hESC	244	10	93280707	93281149	442	93280832	58	37.0769	13	0	0	0
hESC	245	10	93841988	93842211	223	93842080	42	34	7	0	0	0
hESC	246	10	95230302	95230505	203	95230384	28	25.2857	7	0	0	2	ACSM6, PDLIM1	36184, 60764	downstream, downstream
hESC	247	10	96043161	96043430	269	96043360	20	17.6667	9	1	2	4	ENTPD1-AS1, CC2D2B, CCNJ, LOC105378439	46875, 69331, 1586, 981	in gene, downstream, in gene, in gene
hESC	248	10	96345275	96345573	298	96345440	48	37.1	10	0	0	2	DNTT, OPALIN	41112, 13925	downstream, in gene
hESC	249	10	97337166	97337392	226	97337280	32	27.1429	7	0	2	2	FRAT2, LOC105378448	-2579, 1834	upstream, in gene
hESC	250	10	97633337	97633711	374	97633584	74	53.1667	12	1	2	2	MORN4, PI4K2A	572, -7102	in gene, upstream
hESC	251	10	97687292	97687786	494	97687520	131	76	16	1	1	1	AVPI1	-262	upstream
hESC	252	10	97879336	97879564	228	97879472	24	19.5714	7	0	0	2	GOLGA7B, CRTAC1	29234, 151356	downstream, in gene
hESC	253	10	98456180	98456427	247	98456256	20	17.25	8	0	0	3	HPS1, LOC101927278, HPSE2	-9293, 9609, 779619	upstream, downstream, downstream
hESC	254	10	100485856	100486246	390	100486096	22	18.7692	13	0	1	3	WNT8B, LOC105378452, SEC31B	23041, -6218, 33742	downstream, upstream, downstream
hESC	255	10	101643918	101644189	271	101644032	33	27	8	0	0	1	FBXW4	51005	in gene
hESC	256	10	101830727	101830995	268	101830880	28	24.375	8	1	0	3	KCNIP2-AS1, KCNIP2, LOC101927445	11812, 13040, -9069	downstream, in gene, upstream
hESC	257	10	102152096	102152369	273	102152160	33	28.6667	9	1	1	2	PPRC1, NOLC1	19166, -16	downstream, upstream
hESC	258	10	102399421	102399629	208	102399552	23	21.8571	7	1	0	2	NFKB2, PSD	5442, 20609	in gene, downstream
hESC	259	10	102918500	102918722	222	102918624	28	24.1429	7	1	1	1	CNNM2	331	in gene
hESC	260	10	103739108	103739701	593	103739344	127	68.7222	18	0	1	2	SH3PXD2A, SH3PXD2A-AS1	116138, -7435	in gene, upstream
hESC	261	10	103908284	103908612	328	103908416	57	40.4545	11	0	0	1	OBFC1	9871	in gene
hESC	262	10	105539024	105539230	206	105539088	26	24.3333	6	0	0	1	LOC102724418	103672	in gene
hESC	263	10	106535386	106535617	231	106535520	25	19.875	8	0	0	0
hESC	264	10	109042916	109043126	210	109043040	20	15.8333	6	0	0	0
hESC	265	10	109393495	109393764	269	109393616	26	19.5556	9	0	0	0
hESC	266	10	109935009	109935257	248	109935056	20	17.8571	7	0	0	0
hESC	267	10	111136992	111137268	276	111137104	28	23.5556	9	0	0	0
hESC	268	10	115996165	115996386	221	115996224	23	17.5714	7	0	0	0
hESC	269	10	117159395	117159853	458	117159552	100	55.4286	14	0	0	2	MIR3663HG, MIR3663	9503, 8222	in gene, downstream
hESC	270	10	119479599	119479863	264	119479680	32	25.125	8	0	0	0
hESC	271	10	119873036	119873265	229	119873168	17	16.1429	7	1	1	1	MCMBP	460	in gene
hESC	272	10	120556117	120556449	332	120556288	26	20.0909	11	0	0	1	PPAPDC1A	99334	in gene
hESC	273	10	121289390	121289592	202	121289440	26	23.3333	6	0	0	1	LOC105378523	33505	downstream
hESC	274	10	121596790	121596992	202	121596832	22	19	7	1	1	1	FGFR2	1824	in gene
hESC	275	10	121732936	121733139	203	121733056	31	27.6667	6	0	0	1	ATE1	195745	downstream
hESC	276	10	121891261	121891492	231	121891376	26	21.875	8	0	0	1	ATE1	37425	in gene
hESC	277	10	122342410	122342774	364	122342592	44	32.2727	11	0	0	1	BTBD16	71764	downstream
hESC	278	10	122845954	122846212	258	122846064	23	18.75	8	0	1	3	FAM24B-CUZD1, CUZD1, FAM24B	33577, 111, 33577	in gene, in gene, downstream
hESC	279	10	123151405	123151763	358	123151552	25	20.3636	11	1	1	2	HMX2, BUB3	9131, -2692	downstream, upstream
hESC	280	10	123459465	123459813	348	123459600	47	37.7273	11	0	0	1	LOC105378531	106914	in gene
hESC	281	10	124020925	124021210	285	124021024	31	21.8889	9	0	0	1	CHST15	72660	in gene
hESC	282	10	124241147	124241372	225	124241232	20	16.5714	7	0	0	0
hESC	283	10	124470004	124470304	300	124470144	58	41.7	10	0	0	1	LHPP	8372	in gene
hESC	284	10	127000669	127000971	302	127000800	40	29.6	10	0	0	2	DOCK1, LOC105378552	95391, 25624	in gene, in gene
hESC	285	10	131049119	131049452	333	131049280	67	49	11	0	0	0
hESC	286	10	131387080	131387289	209	131387168	18	16	6	0	0	0
hESC	287	10	131790064	131790475	411	131790176	22	17.6154	13	0	1	1	LINC01164	23	in gene
hESC	288	10	132043835	132044112	277	132043968	21	18	9	0	0	1	JAKMIP3	7861	in gene
hESC	289	10	133232328	133232563	235	133232416	28	24.5714	7	0	2	3	KNDC1, UTF1, VENTX	71949, 2142, -5488	downstream, downstream, upstream
hESC	290	11	518946	519150	204	519008	17	15.1667	6	1	1	3	LOC105376507, LRRC56, LOC101059906	5164, 8, -9476	downstream, in gene, upstream
hESC	291	11	944862	945093	231	944944	26	23.125	8	0	0	1	AP2A2	19135	in gene
hESC	292	11	1763737	1764016	279	1763856	34	24.7778	9	1	1	2	CTSD, LOC105376517	136, 14737	in gene, downstream
hESC	293	11	3642208	3642641	433	3642336	32	28.2143	14	1	2	2	ART5, ART1	-20, 102	upstream, in gene
hESC	294	11	4094491	4094841	350	4094656	113	77.3636	11	1	1	2	STIM1, RRM1	238953, 95	downstream, in gene
hESC	295	11	5257391	5257608	217	5257504	32	27.2857	7	0	1	2	HBG1, HBG2	-7647, -2723	upstream, upstream
hESC	296	11	6619214	6619575	361	6619392	106	72.5455	11	0	2	4	ILK, TAF10, TPP1, DCHS1	15684, -7148, 69, 36457	downstream, upstream, in gene, downstream
hESC	297	11	9460519	9460873	354	9460672	64	46.2727	11	1	2	2	LOC644656, ZNF143	26, -293	in gene, upstream
hESC	298	11	9922797	9923033	236	9922912	38	32.4286	7	0	0	2	SBF2, LOC101928008	371295, 83770	in gene, in gene
hESC	299	11	10351979	10352481	502	10352192	79	53.25	16	0	0	1	CAND1.11	43879	in gene
hESC	300	11	10808781	10809191	410	10809024	32	25.8462	13	1	3	4	EIF4G2, SNORD97, LOC101928053, LOC105376545	11, -7416, -273, 16666	in gene, upstream, upstream, downstream
hESC	301	11	10857791	10858014	223	10857824	25	22.1429	7	1	2	3	LOC105376546, ZBED5, ZBED5-AS1	-9879, 249, -393	upstream, in gene, upstream
hESC	302	11	11280053	11280334	281	11280192	23	17.6667	9	0	0	1	GALNT18	341853	in gene
hESC	303	11	11363798	11364041	243	11363872	31	23.375	8	0	0	1	GALNT18	258173	in gene
hESC	304	11	12914201	12914635	434	12914496	34	27.4286	14	0	0	1	TEAD1	240074	in gene
hESC	305	11	13463154	13463540	386	13463344	23	19.3333	12	1	1	1	BTBD10	-47	upstream
hESC	306	11	14358334	14358612	278	14358496	22	18.6667	9	1	0	1	RRAS2	6010	in gene
hESC	307	11	15471937	15472270	333	15472128	34	25.4	10	0	1	1	LOC105376566	-6806	upstream
hESC	308	11	15552551	15552846	295	15552672	46	36.5556	9	0	0	1	LOC105376569	-9484	upstream
hESC	309	11	18322256	18322488	232	18322304	34	29.1429	7	1	2	2	HPS5, GTF2H1	194, 35	in gene, in gene
hESC	310	11	19772547	19772780	233	19772640	26	23	7	0	0	1	NAV2	427393	in gene
hESC	311	11	20027142	20027461	319	20027264	32	26	10	0	1	2	NAV2, LOC105376581	682017, -2485	in gene, upstream
hESC	312	11	21861409	21861641	232	21861504	23	19.5714	7	0	0	1	LOC102723370	107911	in gene
hESC	313	11	27348003	27348244	241	27348160	24	21.4286	7	0	0	1	CCDC34	15088	in gene
hESC	314	11	27443907	27444176	269	27443968	24	19.25	8	0	0	1	LGR4	28819	in gene
hESC	315	11	27625997	27626390	393	27626176	24	20.4167	12	0	0	2	BDNF-AS, LINC00678	119324, 8451	in gene, in gene
hESC	316	11	33039236	33039637	401	33039360	59	40.6667	12	1	1	2	DEPDC7, TCP11L1	23496, -57	downstream, upstream
hESC	317	11	36289214	36289636	422	36289392	122	75.0714	14	0	2	2	COMMD9, PRR5L	57, -6783	in gene, upstream
hESC	318	11	41117057	41117318	261	41117184	31	25.375	8	0	0	1	LRRC4C	343028	in gene
hESC	319	11	43072114	43072389	275	43072208	51	38.6667	9	0	0	0
hESC	320	11	43358859	43359140	281	43358944	31	24.2222	9	1	1	1	TTC17	59	in gene
hESC	321	11	44467955	44468261	306	44468064	26	19.8	10	0	0	0
hESC	322	11	44556885	44557109	224	44556960	31	26.1429	7	0	1	1	CD82	-7467	upstream
hESC	323	11	46339049	46339274	225	46339125	27	24.5714	7	0	0	1	DGKZ	6220	in gene
hESC	324	11	47248709	47249112	403	47248944	52	37.75	12	1	2	3	DDB2, ACP2, NR1H3	34002, -97, 644	downstream, upstream, in gene
hESC	325	11	47715164	47715440	276	47715296	22	16.5556	9	1	1	2	AGBL2, FNBP4	86, 52164	in gene, downstream
hESC	326	11	56659730	56659971	241	56659872	27	21.125	8	0	1	1	OR5AR1	-3814	upstream
hESC	327	11	57639401	57639723	322	57639520	44	34.5	10	0	1	2	MIR130A, YPEL4	-1678, 10424	upstream, downstream
hESC	328	11	57646754	57647206	452	57647008	44	35.7143	14	1	0	2	MIR130A, YPEL4	5810, 2936	downstream, in gene
hESC	329	11	57647328	57647605	277	57647440	28	25.4444	9	1	1	2	MIR130A, YPEL4	6242, 2504	downstream, in gene
hESC	330	11	62709315	62710097	782	62709616	226	99	24	1	1	4	HNRNPUL2-BSCL2, BSCL2, GNG3, HNRNPUL2	17768, 3, 3194, 17769	in gene, in gene, downstream, downstream
hESC	331	11	62787204	62787501	297	62787339	28	26.2222	9	1	2	6	TAF6L, TMEM179B, MIR6748, TMEM223, NXF1, MIR6514	16036, -60, -2476, 4675, 18153, 5432	in gene, upstream, upstream, downstream, downstream, downstream
hESC	332	11	63939016	63939317	301	63939136	48	38.3333	9	1	1	1	NAA40	166	in gene
hESC	333	11	63986428	63986662	234	63986496	36	28.625	8	1	1	2	COX8A, OTUB1	11889, 643	downstream, in gene
hESC	334	11	64285511	64285765	254	64285648	38	31.375	8	1	2	3	GPR137, BAD, KCNK4	16388, -944, -5673	in gene, upstream, upstream
hESC	335	11	64742924	64743147	223	64742997	19	18	7	1	1	2	RASGRP2, PYGM	2459, 17718	in gene, downstream
hESC	336	11	65027250	65027597	347	65027360	32	26	11	1	1	4	ARL2-SNX15, ARL2, MIR6879, SNX15	13247, 13247, 8855, -48	in gene, downstream, downstream, upstream
hESC	337	11	65315542	65315777	235	65315696	22	18.625	8	1	2	3	POLA2, LOC105369344, CDC42EP2	53844, -976, 878	downstream, upstream, in gene
hESC	338	11	65711837	65712404	567	65712048	138	75.1111	18	1	1	2	KAT5, RNASEH2C	52, 8890	in gene, downstream
hESC	339	11	66638569	66638773	204	66638592	30	25.5	6	1	1	3	RBM14-RBM4, RBM14, RBM4	22010, 22010, -25	in gene, downstream, upstream
hESC	340	11	67006510	67006841	331	67006624	62	45	10	0	1	1	SYT12	-149	upstream
hESC	341	11	67302870	67303119	249	67302944	28	23.375	8	1	1	2	ANKRD13D, SSH3	13653, -504	downstream, upstream
hESC	342	11	67391670	67392038	368	67391840	82	55.4167	12	1	1	3	LOC100130987, RAD9A, PPP1CA	74001, -112, 10065	downstream, upstream, downstream
hESC	343	11	67482939	67483452	513	67483328	33	24	16	1	2	3	AIP, MIR6752, PITPNM1	299, -6917, 22044	in gene, upstream, downstream
hESC	344	11	68540659	68540865	206	68540720	26	22.1429	7	0	0	1	PPP6R3	80002	in gene
hESC	345	11	70073206	70073505	299	70073312	43	32.2	10	0	2	4	LOC101928443, LOC105369371, ANO1-AS2, ANO1	-7941, 7936, 2036, -4990	upstream, downstream, in gene, upstream
hESC	346	11	70834323	70834571	248	70834432	36	27.875	8	0	0	1	SHANK2	418306	in gene
hESC	347	11	71928721	71929061	340	71928864	81	54.8182	11	0	1	1	RNF121	163	in gene
hESC	348	11	72103340	72103674	334	72103488	60	43.7	10	1	1	3	LRTOMT, LAMTOR1, ANAPC15	23157, -101, 9288	in gene, upstream, downstream
hESC	349	11	72408774	72409030	256	72408896	26	21.5	8	0	0	1	CLPB	25784	in gene
hESC	350	11	72705912	72706168	256	72706064	20	18.125	8	0	0	1	ARAP1	46325	in gene
hESC	351	11	73779339	73779641	302	73779456	38	33.1111	9	1	0	1	MRPL48	-8416	upstream
hESC	352	11	74988594	74988990	396	74988896	21	17.75	12	1	1	2	SPCS2, NEU3	39649, -9	downstream, upstream
hESC	353	11	75814682	75814962	280	75814848	53	43	9	1	2	2	LOC100506113, UVRAG	339, -319	in gene, upstream
hESC	354	11	78929480	78929794	314	78929632	28	20	10	0	0	1	TENM4	511357	in gene
hESC	355	11	87083183	87083385	202	87083296	22	18.5	6	0	0	1	TMEM135	45452	in gene
hESC	356	11	92511883	92512135	252	92512064	28	24.5	8	0	0	1	FAT3	197781	in gene
hESC	357	11	92550459	92550775	316	92550624	71	52.1	10	0	0	1	FAT3	236341	in gene
hESC	358	11	93661467	93661715	248	93661504	25	22.125	8	1	1	1	CEP295	-146	upstream
hESC	359	11	93728886	93729253	367	93729056	23	19.4167	12	0	3	12	CEP295, SCARNA9, SNORA25, SNORA32, SNORD6, SNORA1, SNORA8, SNORD5, SNORA18, MIR1304, SNORA40, TAF1D	67406, 7542, 1590, 2043, 2517, 3077, 3443, 4244, 4541, 4708, 6180, 12481	in gene, downstream, downstream, downstream, downstream, downstream, downstream, downstream, downstream, downstream, downstream, downstream
hESC	360	11	94119824	94120221	397	94119904	37	28.1667	12	0	0	2	HEPHL1, PANX1	98692, -9024	downstream, upstream
hESC	361	11	96608235	96608447	212	96608304	23	21.3333	6	0	0	0
hESC	362	11	97856767	97856975	208	97856800	32	24.4286	7	0	0	0
hESC	363	11	100978498	100978790	292	100978656	40	29.7778	9	0	0	1	ARHGAP42	290980	in gene
hESC	364	11	102346788	102347309	521	102347104	149	89.5	16	1	1	2	BIRC3, BIRC2	29731, -78	downstream, upstream
hESC	365	11	104581313	104581599	286	104581440	47	38	8	0	0	1	LOC102723895	27862	in gene
hESC	366	11	109106300	109106516	216	109106336	29	25.2857	7	0	0	0
hESC	367	11	112612198	112612681	483	112612320	28	23.5333	15	0	0	0
hESC	368	11	112822592	112822834	242	112822720	38	31.75	8	0	0	1	LOC105369498	12663	in gene
hESC	369	11	113629037	113629352	315	113629152	62	44.7	10	0	0	0
hESC	370	11	113849880	113850108	228	113849952	24	22.7143	7	0	0	1	USP28	25618	in gene
hESC	371	11	114232668	114232908	240	114232800	26	21.5	8	0	0	1	ZBTB16	173221	in gene
hESC	372	11	118659616	118659848	232	118659696	18	15.125	8	0	0	2	PHLDB1, TREH	53257, 19994	downstream, in gene
hESC	373	11	119067598	119068014	416	119067808	70	49.6154	13	1	1	1	VPS11	56	in gene
hESC	374	11	119101848	119102223	375	119102016	60	44.25	12	0	3	4	HMBS, H2AFX, DPAGT1, C2CD2L	17140, -6549, 398, -5325	downstream, upstream, in gene, upstream
hESC	375	11	119417434	119417639	205	119417472	20	18.4286	7	0	0	2	USP2-AS1, THY1	35694, 6064	in gene, downstream
hESC	376	11	120645718	120646085	367	120645888	100	64.3333	12	0	0	1	GRIK4	134142	in gene
hESC	377	11	123775262	123775498	236	123775424	32	25.5	8	0	0	0
hESC	378	11	124115226	124115497	271	124115328	43	32	9	0	1	1	VWA5A	-76	upstream
hESC	379	11	126211500	126211851	351	126211648	51	38.5455	11	1	2	2	RPUSD4, FAM118B	44, 198	in gene, in gene
hESC	380	11	126303774	126303984	210	126303856	24	21.7143	7	1	2	3	TIRAP, LOC105369557, DCPS	21963, -6011, 104	downstream, upstream, in gene
hESC	381	11	127392698	127392902	204	127392768	23	20.2857	7	0	0	0
hESC	382	11	130002623	130002839	216	130002720	21	18.5714	7	1	2	2	PRDM10, LINC00167	330, 96	in gene, in gene
hESC	383	11	130404102	130404357	255	130404160	32	25.875	8	0	0	2	LOC646383, ADAMTS8	89170, 24484	in gene, downstream
hESC	384	11	133712265	133712519	254	133712400	28	24.375	8	0	0	0
hESC	385	11	133854673	133854949	276	133854784	27	21.2222	9	0	0	1	SPATA19	-9246	upstream
hESC	386	11	134272894	134273357	463	134273088	56	39.1333	15	0	1	2	ACAD8, GLB1L3	19551, -3234	downstream, upstream
hESC	387	11	134731621	134731901	280	134731744	47	36.875	8	0	0	0
hESC	388	12	2417810	2418062	252	2417920	31	25.375	8	0	0	1	CACNA1C	447134	in gene
hESC	389	12	4025587	4025866	279	4025712	28	23.7778	9	0	0	1	LOC105369611	12685	downstream
hESC	390	12	4272334	4272789	455	4272416	28	21.6429	14	1	1	2	CCND2-AS1, CCND2	3768, -1317	in gene, upstream
hESC	391	12	4720689	4720915	226	4720800	24	20.7143	7	0	2	2	LOC101929549, GALNT8	-698, 214	upstream, in gene
hESC	392	12	5965075	5965277	202	5965152	32	28.3333	6	0	0	1	VWF	159518	in gene
hESC	393	12	7694594	7694807	213	7694624	18	16.1667	6	0	1	1	GDF3	1140	in gene
hESC	394	12	8081929	8082202	273	8082080	27	24.625	8	1	1	1	NECAP1	-131	upstream
hESC	395	12	8475567	8475940	373	8475648	16	13.9167	12	0	0	1	CLEC6A	19653	in gene
hESC	396	12	8819276	8819494	218	8819424	23	20	7	0	1	1	A2ML1	-3130	upstream
hESC	397	12	11609004	11609210	206	11609088	22	20.6667	6	0	0	0
hESC	398	12	12676674	12676934	260	12676800	28	21.75	8	0	0	1	GPR19	40472	in gene
hESC	399	12	12684486	12684829	343	12684640	80	61.1	10	0	0	1	GPR19	32632	in gene
hESC	400	12	13749444	13749719	275	13749536	38	30.5	8	0	0	1	GRIN2B	232466	in gene
hESC	401	12	13799585	13799820	235	13799680	30	23.4286	7	0	0	1	GRIN2B	182322	in gene
hESC	402	12	14700837	14701103	266	14700944	15	13.75	8	0	1	1	GUCY2C	-4326	upstream
hESC	403	12	14771038	14771341	303	14771168	44	33.2	10	1	3	3	LOC105369669, HIST4H4, H2AFJ	-506, -37, -3168	upstream, upstream, upstream
hESC	404	12	19130575	19130796	221	19130592	17	14.1429	7	1	1	1	PLEKHA5	900	in gene
hESC	405	12	24133410	24133612	202	24133504	20	18.3333	6	0	0	1	SOX5	429165	in gene
hESC	406	12	27014265	27014546	281	27014432	29	22	9	1	1	2	TM7SF3, MED21	-5, -8090	upstream, upstream
hESC	407	12	29228949	29229225	276	29229040	21	17.6667	9	0	0	1	FAR2	80037	in gene
hESC	408	12	31728998	31729294	296	31729152	90	67.2222	9	1	1	2	AMN1, LOC105369722	1240, 5644	in gene, downstream
hESC	409	12	31733262	31733505	243	31733344	29	23.625	8	0	1	2	AMN1, LOC105369722	-2952, 9836	upstream, downstream
hESC	410	12	32013465	32013795	330	32013664	39	30.4545	11	0	0	1	LOC102724618	16769	in gene
hESC	411	12	33055757	33056031	274	33055872	23	18.25	8	0	0	0
hESC	412	12	33650156	33650435	279	33650240	31	24.4444	9	0	0	0
hESC	413	12	39752823	39753073	250	39752912	26	21.625	8	0	0	2	LOC105378246, SLC2A13	6904, 353162	in gene, downstream
hESC	414	12	41576934	41577225	291	41577072	40	30.4444	9	0	0	1	PDZRN4	389222	downstream
hESC	415	12	45727472	45727819	347	45727648	66	46.8182	11	1	2	2	LINC00938, ARID2	273, -2041	in gene, upstream
hESC	416	12	45728711	45729004	293	45728864	39	29.5556	9	1	2	2	LINC00938, ARID2	-943, -825	upstream, upstream
hESC	417	12	49069803	49070116	313	49069920	41	34.4	10	1	1	2	KMT2D, RHEBL1	-8025, 105	upstream, in gene
hESC	418	12	52069757	52070026	269	52069856	26	22.2222	9	1	1	2	LOC105369770, ATG101	4736, -118	in gene, upstream
hESC	419	12	52948675	52949048	373	52948864	67	47.9091	11	1	2	2	KRT8, KRT18	1002, -7	in gene, upstream
hESC	420	12	53938496	53938766	270	53938592	36	27.3333	9	0	2	2	HOXC13-AS, HOXC13	1051, -200	in gene, upstream
hESC	421	12	54452672	54452979	307	54452800	33	25.7	10	0	0	2	LOC102724050, GTSF1	99109, 20802	in gene, downstream
hESC	422	12	54683343	54683735	392	54683488	30	24.4167	12	0	0	0
hESC	423	12	55715844	55716402	558	55716032	147	81.9412	17	1	4	5	ITGA7, BLOC1S1-RDH5, BLOC1S1, RDH5, CD63	5, -2, -2, -4335, 13641	in gene, upstream, upstream, upstream, downstream
hESC	424	12	56725214	56725416	202	56725248	32	28.4286	7	1	1	2	NACA, PRIM1	1027, 27114	in gene, downstream
hESC	425	12	57609286	57609526	240	57609376	30	25.1429	7	0	1	4	PIP4K2C, DTX3, ARHGEF25, LOC101927583	18217, 5049, -804, 12527	downstream, in gene, upstream, downstream
hESC	426	12	57752299	57752710	411	57752480	86	54.4615	13	1	3	5	TSPAN31, CDK4, MIR6759, MARCH9, CYP27B1	8390, -33, -3798, -1142, 14713	downstream, upstream, upstream, upstream, downstream
hESC	427	12	57846680	57847272	592	57846816	38	24.7895	19	1	1	2	CTDSP2, LOC105369783	148, 20407	in gene, downstream
hESC	428	12	59317897	59318228	331	59317984	26	21.7	10	0	0	0
hESC	429	12	59318406	59318724	318	59318560	25	20.5	10	0	0	0
hESC	430	12	59319525	59319832	307	59319712	18	15.6667	9	0	0	0
hESC	431	12	61504514	61504760	246	61504672	15	13.4286	7	0	0	0
hESC	432	12	62260117	62260323	206	62260224	28	23.2857	7	1	3	3	FAM19A2, USP15, MIR6125	-160, -116, -135	upstream, upstream, upstream
hESC	433	12	62602519	62602782	263	62602560	32	28.375	8	1	2	3	MON2, LINC01465, MIRLET7I	135743, 874, -1126	downstream, in gene, upstream
hESC	434	12	62629452	62629693	241	62629600	39	33.1429	7	0	0	0
hESC	435	12	64759248	64759566	318	64759392	56	39.2	10	1	1	1	GNS	54	in gene
hESC	436	12	67519879	67520223	344	67520064	64	46.8	10	0	1	1	LOC100507175	-18	upstream
hESC	437	12	68332471	68332710	239	68332512	18	14.75	8	1	2	2	MDM1, LOC105369819	-131, -1154	upstream, upstream
hESC	438	12	69470238	69470440	202	69470304	16	13.8571	7	1	1	2	LOC105369822, FRS2	38753, -45	downstream, upstream
hESC	439	12	69896742	69896959	217	69896800	37	30.5	6	0	0	1	MYRFL	72231	in gene
hESC	440	12	71663922	71664372	450	71664192	38	28.6429	14	1	3	3	ZFC3H1, LOC105369835, THAP2	-223, -1186, 295	upstream, upstream, in gene
hESC	441	12	80230154	80230383	229	80230272	33	28.7143	7	0	0	1	OTOGL	99770	in gene
hESC	442	12	80684235	80684465	230	80684352	28	23.5714	7	0	0	2	PTPRQ, LOC105378252	240078, 22866	downstream, in gene
hESC	443	12	80775129	80775382	253	80775296	17	13	8	0	0	1	LINC01490	12142	downstream
hESC	444	12	88951982	88952188	206	88952000	20	17.5	6	0	0	0
hESC	445	12	89247609	89247913	304	89247744	35	23.8	10	0	0	0
hESC	446	12	89884028	89884280	252	89884112	28	24.125	8	0	0	0
hESC	447	12	91370157	91370412	255	91370304	28	24.375	8	0	1	3	LOC105369898, LOC105369897, LOC105369896	-4868, 43344, 29069	upstream, downstream, in gene
hESC	448	12	93677124	93677551	427	93677344	146	93.7692	13	1	1	1	CRADD	-7	upstream
hESC	449	12	94047036	94047330	294	94047168	35	25.3	10	0	0	1	LOC105369913	4348	in gene
hESC	450	12	96215331	96215608	277	96215424	39	30.625	8	0	0	1	ELK3	21042	in gene
hESC	451	12	97131643	97131845	202	97131664	22	19.8571	7	0	0	0
hESC	452	12	97785037	97785330	293	97785184	31	22.4444	9	0	0	0
hESC	453	12	98837372	98837652	280	98837472	26	20.7778	9	0	0	1	ANKS1B	1147255	in gene
hESC	454	12	98857257	98857472	215	98857328	29	24.2857	7	0	0	1	ANKS1B	1127399	in gene
hESC	455	12	103965766	103966102	336	103965920	28	22.4	10	1	1	2	C12orf73, TDG	-8705, 105	upstream, in gene
hESC	456	12	105740205	105740425	220	105740272	26	21.2857	7	0	0	1	CASC18	36069	in gene
hESC	457	12	108561319	108561528	209	108561472	33	29.3333	6	1	2	2	SART3, ISCU	-83, 9	upstream, in gene
hESC	458	12	110502183	110502409	226	110502256	39	32.5714	7	1	2	2	VPS29, RAD9B	-114, 56	upstream, in gene
hESC	459	12	110936959	110937297	338	110937141	33	27.0909	11	0	1	1	LINC01405	539	in gene
hESC	460	12	112013238	112013615	377	112013392	44	32.3333	12	1	2	2	TMEM116, ERP29	-173, 44	upstream, in gene
hESC	461	12	112578054	112578373	319	112578176	78	54.6	10	0	0	0
hESC	462	12	112777683	112777914	231	112777776	34	30.5714	7	0	0	0
hESC	463	12	113245795	113246084	289	113245888	49	39.4444	9	0	0	1	TPCN1	24808	in gene
hESC	464	12	113587703	113587905	202	113587808	29	23.7143	7	0	0	0
hESC	465	12	113747046	113747405	359	113747200	60	43.3636	11	0	0	1	LINC01234	26483	in gene
hESC	466	12	113966203	113966444	241	113966272	41	32.25	8	1	1	1	RBM19	99	in gene
hESC	467	12	115507976	115508247	271	115508128	46	37.875	8	0	0	1	LOC105370003	255132	in gene
hESC	468	12	115917258	115917475	217	115917424	16	13.8571	7	1	0	0
hESC	469	12	118611524	118611773	249	118611664	20	17.2857	7	0	0	0
hESC	470	12	119089298	119089680	382	119089440	69	47.75	12	0	0	2	SRRM4, LOC105370021	107954, 35545	in gene, in gene
hESC	471	12	120904311	120904595	284	120904448	44	34.5556	9	1	1	1	SPPL3	-96	upstream
hESC	472	12	121016280	121016610	330	121016432	32	24.5455	11	1	1	2	C12orf43, OASL	70, 22810	in gene, downstream
hESC	473	12	121802875	121803175	300	121803040	24	20	10	1	2	3	RHOF, LINC01089, SETD1B	-9352, 444, -490	upstream, in gene, upstream
hESC	474	12	122266240	122266671	431	122266464	166	99.8571	14	1	1	2	VPS33A, CLIP1	57, 156168	in gene, downstream
hESC	475	12	122526734	122526943	209	122526752	27	24.3333	6	1	2	2	RSRC2, KNTC1	261, -497	in gene, upstream
hESC	476	12	122752664	122752917	253	122752768	42	35.25	8	1	1	1	DENR	-53	upstream
hESC	477	12	122974671	122975330	659	122974976	28	22.5714	21	1	3	4	ABCB9, OGFOD2, ARL6IP4, PITPNM2	149, 273, -5084, 175834	in gene, in gene, upstream, downstream
hESC	478	12	123402052	123402324	272	123402176	31	24.5	8	0	0	2	SETD8, RILPL2	18398, 34557	in gene, downstream
hESC	479	12	123711645	123712554	909	123712224	179	65.0345	29	1	1	3	TCTN2, ATP6V0A2, LOC105370042	41111, -94, 11884	downstream, upstream, downstream
hESC	480	12	124655916	124656152	236	124656080	18	16	7	0	0	1	LOC105370049	28124	in gene
hESC	481	12	124786625	124786869	244	124786768	51	44.8571	7	0	0	1	SCARB1	77205	in gene
hESC	482	12	124833748	124833990	242	124833856	33	26.5	8	0	0	1	SCARB1	30117	in gene
hESC	483	12	125281001	125281233	232	125281088	18	16.5714	7	0	1	2	TMEM132B, LOC105370054	94314, 207	in gene, in gene
hESC	484	12	128459144	128459417	273	128459296	39	32.875	8	0	0	1	TMEM132C	191893	in gene
hESC	485	12	129872120	129872510	390	129872144	36	32.5	12	0	0	1	TMEM132D	31586	in gene
hESC	486	12	131624807	131625258	451	131624944	53	33.7143	14	0	0	0
hESC	487	12	131710898	131711204	306	131710992	30	24.9	10	1	1	1	SFSWAP	-95	upstream
hESC	488	12	131723656	131723871	215	131723776	21	19	6	0	0	1	SFSWAP	12689	in gene
hESC	489	12	132687320	132687633	313	132687472	57	41	10	1	2	2	POLE, PXMP2	52, -134	in gene, upstream
hESC	490	12	132887621	132887877	256	132887712	32	26	8	1	2	2	CHFR, LOC101928530	-94, -130	upstream, upstream
hESC	491	13	20119155	20119516	361	20119344	32	26.2727	11	0	1	1	LOC105370101	585	in gene
hESC	492	13	21124011	21124241	230	21124080	30	25.8571	7	0	0	0
hESC	493	13	22369926	22370128	202	22370000	24	21.3333	6	0	0	0
hESC	494	13	24141374	24141578	204	24141440	23	18.7143	7	0	0	1	SPATA13	161814	in gene
hESC	495	13	25136965	25137223	258	25137120	32	26.125	8	0	0	0
hESC	496	13	25137463	25137667	204	25137568	26	22.8571	7	0	0	0
hESC	497	13	25910966	25911315	349	25911152	41	33.7273	11	0	0	1	ATP8A2	539141	in gene
hESC	498	13	27965973	27966385	412	27966112	44	29.1538	13	1	0	1	CDX2	3256	in gene
hESC	499	13	30052025	30052415	390	30052208	52	37.75	12	0	0	0
hESC	500	13	36795600	36795856	256	36795744	44	34.375	8	0	2	2	LOC102723490, ARL2BPP3	-6558, 1260	upstream, downstream
hESC	501	13	36999236	36999438	202	36999296	24	20.6667	6	1	2	3	ALG5, EXOSC8, SUPT20H	71, -1077, 60417	in gene, upstream, downstream
hESC	502	13	37198791	37199011	220	37198880	25	21.1429	7	0	0	0
hESC	503	13	37914777	37915085	308	37914912	17	15	10	0	0	0
hESC	504	13	38210979	38211185	206	38211040	24	21.3333	6	0	1	1	LOC105370166	-4787	upstream
hESC	505	13	39329161	39329424	263	39329312	35	27.5	8	0	0	0
hESC	506	13	39348413	39348615	202	39348576	22	19.7143	7	0	0	1	LHFP	254643	in gene
hESC	507	13	39385545	39385878	333	39385696	37	28	10	0	0	1	LHFP	217523	in gene
hESC	508	13	40680615	40680967	352	40680800	59	42	11	0	0	0
hESC	509	13	42170061	42170266	205	42170128	21	18.8333	6	0	0	1	DGKH	130092	in gene
hESC	510	13	42593441	42593796	355	42593600	53	38.4545	11	0	0	1	TNFSF11	30864	in gene
hESC	511	13	42849256	42849658	402	42849280	18	15.1667	12	0	0	1	LINC00428	23464	in gene
hESC	512	13	44420531	44420783	252	44420624	22	18.25	8	0	0	1	LOC105370184	7789	downstream
hESC	513	13	45341155	45341542	387	45341200	22	18.4167	12	1	3	3	TPT1, SNORA31, TPT1-AS1	84, -3591, -145	in gene, upstream, upstream
hESC	514	13	46666721	46667007	286	46666816	28	22.75	8	0	0	1	LRCH1	113678	in gene
hESC	515	13	49110057	49110424	367	49110208	68	46.3636	11	0	0	1	FNDC3A	134296	in gene
hESC	516	13	49585337	49585697	360	49585472	37	24.4167	12	1	1	1	RCBTB1	134	in gene
hESC	517	13	51148337	51148704	367	51148480	45	34	12	0	0	1	LINC00371	23908	in gene
hESC	518	13	51181738	51182040	302	51181888	22	19.2222	9	0	0	1	LINC00371	-9500	upstream
hESC	519	13	51303043	51303490	447	51303296	38	30.9286	14	0	0	1	LOC105370206	21438	in gene
hESC	520	13	52652263	52652542	279	52652288	26	23.875	8	1	1	2	HNRNPA1L2, SUGT1	34818, -408	downstream, upstream
hESC	521	13	53343441	53343738	297	53343600	33	27.2222	9	0	0	0
hESC	522	13	54946028	54946274	246	54946144	24	20.25	8	0	0	0
hESC	523	13	55570764	55571508	744	55571008	53	37.6522	23	0	0	0
hESC	524	13	55571605	55571888	283	55571712	32	26.7778	9	0	0	0
hESC	525	13	55572046	55572272	226	55572208	20	17.4286	7	0	0	0
hESC	526	13	55572362	55572790	428	55572544	29	24.8462	13	0	0	0
hESC	527	13	60572414	60572683	269	60572576	36	29.4444	9	0	0	1	TDRD3	176119	in gene
hESC	528	13	60584564	60584797	233	60584640	32	28	7	0	0	0
hESC	529	13	67736838	67737041	203	67736976	26	24	6	0	0	0
hESC	530	13	72527313	72527587	274	72527424	34	25.8889	9	0	0	0
hESC	531	13	75803218	75803569	351	75803360	79	56.4545	11	0	0	1	LMO7	182926	in gene
hESC	532	13	79782838	79783100	262	79782976	33	28.875	8	0	0	0
hESC	533	13	80359786	80360072	286	80359904	44	34.2222	9	0	0	1	LOC105370276	2972	in gene
hESC	534	13	84025898	84026174	276	84026032	24	20.25	8	0	0	1	LOC105370288	119459	in gene
hESC	535	13	84654936	84655259	323	84655072	42	31.3	10	0	0	0
hESC	536	13	84883017	84883251	234	84883136	21	18.7143	7	0	0	1	LOC105370290	19295	in gene
hESC	537	13	94996537	94996800	263	94996624	24	19	9	0	0	0
hESC	538	13	97227373	97227597	224	97227488	26	22.7143	7	0	0	2	MBNL2, LOC101927385	85668, 70615	in gene, downstream
hESC	539	13	97267653	97267965	312	97267808	19	15.8889	9	0	0	2	MBNL2, LOC101927385	125988, 30295	in gene, in gene
hESC	540	13	97976106	97976438	332	97976256	34	24.6	10	1	0	1	IPO5	22618	in gene
hESC	541	13	99379040	99379274	234	99379168	34	28.25	8	0	0	1	UBAC2	178743	in gene
hESC	542	13	99661777	99662005	228	99661856	26	22.2857	7	0	0	1	CLYBL	55192	in gene
hESC	543	13	99957605	99957844	239	99957696	30	26.8571	7	1	1	2	LOC101927437, ZIC5	-531, 14228	upstream, downstream
hESC	544	13	105817009	105817226	217	105817120	23	19.8571	7	0	0	0
hESC	545	13	106796322	106796546	224	106796480	33	28.7143	7	0	0	1	LOC105370349	-9143	upstream
hESC	546	13	107574629	107574842	213	107574720	26	22.1667	6	0	0	1	FAM155A	292535	in gene
hESC	547	13	111634491	111634792	301	111634656	24	18.4	10	0	0	1	LOC105370369	11407	in gene
hESC	548	13	112161999	112162220	221	112162112	31	25.7143	7	0	1	1	LOC100506016	-1402	upstream
hESC	549	13	112733178	112733502	324	112733344	56	40.5	10	0	1	2	ATP11A, LOC105370374	43295, -3409	in gene, upstream
hESC	550	13	113296734	113297341	607	113297056	241	132.684	19	1	1	1	LAMP1	-65	upstream
hESC	551	13	113376883	113377181	298	113377040	32	25.3333	9	0	0	0
hESC	552	13	113617302	113617752	450	113617520	27	20.2857	14	0	0	1	TFDP1	32832	in gene
hESC	553	14	20578329	20578593	264	20578432	39	32.6667	9	0	0	2	RNASE11, LOC254028	11826, -9792	downstream, upstream
hESC	554	14	21511216	21511637	421	21511424	190	118.077	13	1	1	2	METTL3, SALL2	-49, 25792	upstream, downstream
hESC	555	14	21526407	21526609	202	21526512	25	21.5	6	0	0	1	SALL2	10704	in gene
hESC	556	14	22829731	22829967	236	22829813	28	25.7143	7	1	2	3	SLC7A7, MRPL52, MMP14	-10002, -38, -6720	upstream, upstream, upstream
hESC	557	14	23034686	23035401	715	23035040	133	81.3043	23	0	2	2	PSMB5, PSMB11	180, -7127	in gene, upstream
hESC	558	14	23161210	23161551	341	23161344	45	31.8182	11	0	0	1	SLC7A8	22316	in gene
hESC	559	14	23567610	23567845	235	23567712	39	32.25	8	1	1	4	THTPA, AP1G2, LOC102724814, JPH4	55952, 1833, 6615, 11088	downstream, in gene, in gene, downstream
hESC	560	14	24114186	24114562	376	24114304	43	33.75	12	1	2	2	NRL, DCAF11	498, -393	in gene, upstream
hESC	561	14	34693284	34693492	208	34693344	25	22	6	0	0	0
hESC	562	14	37060965	37061173	208	37061056	23	20.5	6	0	0	1	SLC25A21	111604	in gene
hESC	563	14	38201413	38202201	788	38202016	36	26.875	24	0	1	1	SSTR1	-5983	upstream
hESC	564	14	38202284	38205538	3254	38202912	58	30.5098	102	0	1	1	SSTR1	-5087	upstream
hESC	565	14	38207555	38208025	470	38207840	25	20.0714	14	1	1	1	SSTR1	-159	upstream
hESC	566	14	38208192	38208440	248	38208256	23	19.625	8	1	1	1	SSTR1	257	in gene
hESC	567	14	41597618	41597901	283	41597776	50	38.7778	9	0	0	2	LOC105370469, LRFN5	9335, -9785	in gene, upstream
hESC	568	14	42475280	42475710	430	42475392	22	18.4615	13	0	0	0
hESC	569	14	53355692	53355963	271	53355824	31	26.25	8	0	0	0
hESC	570	14	56796327	56796567	240	56796496	20	17.2857	7	0	0	1	OTX2	13980	downstream
hESC	571	14	56847139	56847484	345	56847328	36	28	10	0	0	1	OTX2-AS1	34145	in gene
hESC	572	14	58768916	58769320	404	58769136	71	47	13	0	0	0
hESC	573	14	61101966	61102168	202	61102032	33	29.8333	6	0	0	0
hESC	574	14	61255209	61255443	234	61255296	24	20.2857	7	0	0	0
hESC	575	14	61300778	61301006	228	61300896	15	13.7143	7	0	0	0
hESC	576	14	61609588	61609791	203	61609680	35	30.3333	6	0	0	1	FLJ22447	39140	in gene
hESC	577	14	64391323	64391613	290	64391488	32	27	9	0	0	1	MTHFD1	3447	in gene
hESC	578	14	64645608	64645866	258	64645728	51	41.5	8	0	0	1	LOC105370533	12294	in gene
hESC	579	14	64974606	64974904	298	64974752	45	36.1111	9	0	1	2	CHURC1-FNTB, RAB15	60391, -2462	in gene, upstream
hESC	580	14	65187433	65187751	318	65187536	32	26.7	10	0	0	0
hESC	581	14	65412198	65412659	461	65412528	22	17.5714	14	1	2	2	FUT8, FUT8-AS1	1936, 89	in gene, in gene
hESC	582	14	67816383	67816833	450	67816576	78	49.3333	15	0	2	2	ZFYVE26, RAD51B	35, -3203	in gene, upstream
hESC	583	14	68473841	68474082	241	68473984	34	27.25	8	0	0	1	RAD51B	654205	in gene
hESC	584	14	68796225	68796524	299	68796384	41	34.1111	9	1	1	2	ZFP36L1, LOC105370548	-141, 31757	upstream, downstream
hESC	585	14	68979329	68979608	279	68979424	37	29.625	8	1	2	2	ACTN1, ACTN1-AS1	-58, -258	upstream, upstream
hESC	586	14	69398280	69398706	426	69398432	55	41.3846	13	1	2	2	ERH, SLC39A9	-128, 53	upstream, in gene
hESC	587	14	70708722	70709242	520	70708784	23	20	16	0	0	1	LINC01269	10086	in gene
hESC	588	14	73125252	73125529	277	73125328	31	25.375	8	0	0	1	RBM25	66892	downstream
hESC	589	14	75176572	75176854	282	75176704	47	37.7778	9	1	1	1	TMED10	-58	upstream
hESC	590	14	77181447	77181786	339	77181632	62	49.5	10	1	1	1	TMEM63C	-127	upstream
hESC	591	14	77799943	77800389	446	77800144	46	36.2143	14	1	1	1	ADCK1	79	in gene
hESC	592	14	78029865	78030130	265	78030016	51	39.625	8	0	0	1	NRXN3	8258	in gene
hESC	593	14	78985777	78986012	235	78985856	44	38.8571	7	0	0	1	NRXN3	964098	in gene
hESC	594	14	81219288	81219542	254	81219376	48	39	8	0	2	2	GTF2A1, LOC101928504	1855, -1499	in gene, upstream
hESC	595	14	81221111	81221414	303	81221248	62	47	10	1	2	2	GTF2A1, LOC101928504	-17, 373	upstream, in gene
hESC	596	14	87992976	87993388	412	87993280	35	29.2308	13	1	1	1	GALC	385	in gene
hESC	597	14	89293705	89293922	217	89293824	36	28.8571	7	0	0	1	FOXN3	325326	in gene
hESC	598	14	91510159	91510572	413	91510496	26	20.2308	13	1	1	2	SMEK1, LOC101928957	58, 67326	in gene, downstream
hESC	599	14	93051649	93051917	268	93051776	34	29.375	8	0	0	1	ITPK1	64142	in gene
hESC	600	14	94451453	94451658	205	94451568	19	18.1429	7	0	1	2	SERPINA11, LOC105370635	1282, -8549	in gene, upstream
hESC	601	14	95254977	95255200	223	95255104	24	20.1429	7	0	0	1	CLMN	64804	in gene
hESC	602	14	95576074	95576442	368	95576224	67	46.2727	11	0	0	1	LOC100506999	2670	in gene
hESC	603	14	99872888	99873107	219	99873008	26	23.4286	7	0	0	1	EML1	135286	in gene
hESC	604	14	101561451	101561667	216	101561504	29	24.1429	7	1	3	4	DIO3OS, MIR1247, DIO3, LOC105370675	-5828, -1082, 153, 6345	upstream, upstream, in gene, downstream
hESC	605	14	101809790	101809992	202	101809952	22	18.7143	7	0	0	1	PPP2R5C	49379	in gene
hESC	606	14	101810175	101810615	440	101810400	116	75.3571	14	0	0	1	PPP2R5C	49827	in gene
hESC	607	14	101945280	101945518	238	101945392	35	29.125	8	0	0	0
hESC	608	14	101948061	101948626	565	101948352	149	89.8333	18	1	0	0
hESC	609	14	103562418	103563227	809	103562816	246	125.04	25	1	2	2	BAG5, APOPT1	-2, -141	upstream, upstream
hESC	610	14	104291406	104291675	269	104291520	48	37.875	8	0	0	1	LOC105370693	67936	downstream
hESC	611	14	105741674	105741882	208	105741760	24	20.5	6	0	1	2	IGH, IGHG1	1138084, 1310	in gene, in gene
hESC	612	14	105741972	105742206	234	105742016	19	15.5714	7	0	1	2	IGH, IGHG1	1137828, 1054	in gene, in gene
hESC	613	14	105742957	105743165	208	105742992	19	14.8333	6	0	1	2	IGH, IGHG1	1136852, 78	in gene, in gene
hESC	614	14	106556958	106557213	255	106557088	22	17.875	8	0	1	2	IGH, IGHV3-49	322756, 309	in gene, in gene
hESC	615	15	23039475	23039757	282	23039616	37	30.3333	9	1	1	1	TUBGCP5	57	in gene
hESC	616	15	25643225	25643437	212	25643360	29	25.4286	7	0	0	0
hESC	617	15	28876373	28876593	220	28876448	38	31.1429	7	0	0	1	APBA2	-9546	upstream
hESC	618	15	32899210	32899638	428	32899392	94	61.9231	13	0	0	1	FMN1	295392	in gene
hESC	619	15	35020403	35020708	305	35020528	28	21.5	10	0	1	2	LOC105370764, LOC105370763	30838, -5191	downstream, upstream
hESC	620	15	35183131	35183513	382	35183312	84	58.6667	12	0	0	0
hESC	621	15	39782686	39782950	264	39782816	19	16.2222	9	1	2	2	FSIP1, LOC105370941	22, 401	in gene, in gene
hESC	622	15	39808963	39809237	274	39809088	39	31.375	8	0	0	1	GPR176	111804	in gene
hESC	623	15	39887266	39887595	329	39887424	75	54.1	10	0	0	1	GPR176	33468	in gene
hESC	624	15	40108915	40109233	318	40109056	106	74.7	10	1	1	1	BMF	-172	upstream
hESC	625	15	40382695	40382990	295	40382832	46	38.3333	9	1	1	1	KNSTRN	111	in gene
hESC	626	15	40593812	40594126	314	40593984	37	27.8	10	1	2	2	TRS-GCT4-1, CASC5	-78, -265	upstream, upstream
hESC	627	15	40953311	40953513	202	40953472	22	20.1429	7	1	1	2	CHAC1, LOC105370789	34, -9031	in gene, upstream
hESC	628	15	41621328	41621630	302	41621504	31	25.2222	9	1	2	2	LOC105370791, MGA	-339, 272	upstream, in gene
hESC	629	15	42378148	42378377	229	42378240	28	22.8571	7	0	0	2	CAPN3, LOC105370794	18740, 7920	in gene, downstream
hESC	630	15	43105965	43106242	277	43106096	31	24.1111	9	0	1	1	UBR1	-8	upstream
hESC	631	15	43928132	43928345	213	43928256	26	23.5	6	0	0	1	FRMD5	267321	in gene
hESC	632	15	50004081	50004323	242	50004176	29	24.125	8	0	0	1	ATP8B4	177617	in gene
hESC	633	15	50424084	50424303	219	50424208	28	25.1429	7	1	1	1	USP8	-169	upstream
hESC	634	15	59104743	59104988	245	59104880	32	29.4286	7	1	1	2	RNF111, CCNB2	117214, -205	downstream, upstream
hESC	635	15	59997142	59997441	299	59997312	23	20.6	10	1	1	1	FOXB1	-6910	upstream
hESC	636	15	60006298	60006832	534	60006512	97	57.6471	17	1	1	1	FOXB1	2290	downstream
hESC	637	15	60120201	60120411	210	60120320	34	31.6667	6	0	0	0
hESC	638	15	63048101	63048406	305	63048192	41	32.8889	9	1	0	1	TPM1	5553	in gene
hESC	639	15	63048621	63049039	418	63048720	24	20.6923	13	1	0	1	TPM1	6081	in gene
hESC	640	15	63515382	63515595	213	63515504	30	26	7	0	0	1	USP3	10993	in gene
hESC	641	15	63559861	63560105	244	63559968	38	31.5	8	0	0	1	USP3	55457	in gene
hESC	642	15	64093792	64094245	453	64094016	153	90.8667	15	1	2	2	FAM96A, SNX1	-8, -60	upstream, upstream
hESC	643	15	64808881	64809083	202	64808976	27	24.5	6	0	0	1	PIF1	18178	downstream
hESC	644	15	65954493	65954741	248	65954592	34	27.375	8	0	0	1	MEGF11	299145	in gene
hESC	645	15	66497714	66498012	298	66497824	21	19.4444	9	1	3	9	MAP2K1, SNAPC5, MIR4512, RPL4, SNORD18C, SNORD18B, SNORD16, SNORD18A, ZWILCH	110951, -16, -790, 7031, 3494, 4267, 5086, 5490, -7259	downstream, upstream, upstream, downstream, downstream, downstream, downstream, downstream, upstream
hESC	646	15	67030417	67030641	224	67030544	37	32.5714	7	0	0	1	LOC102723493	33638	in gene
hESC	647	15	69120058	69120297	239	69120224	26	21.625	8	0	0	0
hESC	648	15	69524287	69524522	235	69524448	19	16.375	8	0	0	0
hESC	649	15	70452017	70452449	432	70452128	25	20.3571	14	0	0	0
hESC	650	15	71085818	71086039	221	71085920	46	40.1429	7	0	0	1	LOC105370886	7158	downstream
hESC	651	15	71203643	71203957	314	71203808	93	66.5	10	0	0	1	THSD4	88180	in gene
hESC	652	15	72375581	72376303	722	72376000	229	106.87	23	1	2	2	HEXA, HEXA-AS1	179, -113	in gene, upstream
hESC	653	15	72820891	72821118	227	72820992	22	17.8571	7	0	0	0
hESC	654	15	73633372	73633767	395	73633520	47	35.0769	13	1	2	2	NPTN, LOC105370891	-108, -3068	upstream, upstream
hESC	655	15	74100064	74100412	348	74100192	76	47.4545	11	1	0	0
hESC	656	15	75335836	75336374	538	75336032	106	54.4706	17	1	1	1	COMMD4	36	in gene
hESC	657	15	75625330	75626183	853	75625760	247	127.926	27	1	1	1	SNUPN	618	in gene
hESC	658	15	75758461	75758670	209	75758592	31	25.1429	7	0	1	2	LOC101929408, MIR4313	244, 3723	in gene, downstream
hESC	659	15	76311359	76311561	202	76311413	24	22	7	1	1	1	ETFA	56	in gene
hESC	660	15	77510342	77510620	278	77510464	44	35.625	8	0	0	0
hESC	661	15	77739658	77739923	265	77739776	37	30	8	0	0	1	LINGO1	81124	in gene
hESC	662	15	78873411	78873876	465	78873600	48	34.4286	14	1	1	2	LOC105370915, MORF4L1	12737, 819	downstream, in gene
hESC	663	15	79060271	79060473	202	79060384	25	20.6667	6	0	0	1	RASGRF1	30489	in gene
hESC	664	15	84603617	84603948	331	84603744	45	35.5	10	0	0	2	ZSCAN2, LOC105370947	2758, 12601	in gene, downstream
hESC	665	15	84614710	84614912	202	84614848	17	13.7143	7	0	1	2	ZSCAN2, LOC105370947	13862, 1497	in gene, in gene
hESC	666	15	88073318	88073699	381	88073536	32	22.5833	12	0	0	1	NTRK3	183260	in gene
hESC	667	15	88613273	88613498	225	88613376	38	34.4286	7	0	2	5	LINC01586, AEN, MIR1179, MIR7-2, MIR3529	-8266, 8695, 5269, 1551, -1452	upstream, in gene, downstream, downstream, upstream
hESC	668	15	88986118	88986382	264	88986208	36	29.5	8	0	0	0
hESC	669	15	90583892	90584205	313	90584032	48	35.3	10	0	0	2	CRTC3, LOC105370968	54146, 20346	in gene, downstream
hESC	670	15	90839498	90839782	284	90839616	24	20.3333	9	0	1	1	LOC105370969	22	in gene
hESC	671	15	92904055	92904294	239	92904160	43	35.75	8	1	1	3	LINC01578, CHD2, MIR3175	21317, 3839, -239	downstream, in gene, upstream
hESC	672	15	93136107	93136309	202	93136192	27	23.6667	6	0	0	1	LOC101927025	46789	in gene
hESC	673	15	93241908	93242125	217	93241984	30	25.5714	7	0	0	1	LOC105370983	13200	in gene
hESC	674	15	93477257	93477919	662	93477504	28	20.9	20	0	0	1	LOC105370983	248720	in gene
hESC	675	15	95910817	95911200	383	95910992	46	33.8333	12	0	0	0
hESC	676	15	96700054	96700256	202	96700080	26	22.1429	7	0	0	1	LOC105371002	4786	in gene
hESC	677	15	98257257	98257558	301	98257376	22	19.6667	9	0	0	0
hESC	678	15	101069465	101069749	284	101069600	47	37.7778	9	0	0	2	LRRK1, LOC105371026	150385, 82237	in gene, in gene
hESC	679	15	101425816	101426234	418	101426016	47	32	13	0	0	1	PCSK6	63968	in gene
hESC	680	16	370553	370836	283	370656	33	23.3333	9	1	1	3	AXIN1, MRPL28, TMEM8A	-9159, -87, 11294	upstream, upstream, downstream
hESC	681	16	401479	401710	231	401600	19	17.5714	7	1	1	3	LOC100134368, NME4, DECR2	19359, 4845, -258	downstream, downstream, upstream
hESC	682	16	807800	808036	236	807904	38	29.5	8	1	2	3	CHTF18, GNG13, PRR25	19282, -7171, 2461	downstream, upstream, in gene
hESC	683	16	1308995	1309442	447	1309184	77	50.3571	14	1	1	1	UBE2I	31	in gene
hESC	684	16	1351673	1352162	489	1351952	61	35.0625	16	1	2	3	BAIAP3, TSR3, GNPTG	18347, -80, 53	downstream, upstream, in gene
hESC	685	16	1474819	1475358	539	1475008	82	52.0625	16	1	1	1	CLCN7	76	in gene
hESC	686	16	1826973	1827435	462	1827200	85	58	15	1	2	3	HAGH, FAHD1, MEIOB	-6, -24, 44978	upstream, upstream, downstream
hESC	687	16	2520220	2520553	333	2520384	79	50.6364	11	1	1	3	ATP6V0C, AMDHD2, CEMP1	6658, 22, 11024	downstream, in gene, downstream
hESC	688	16	2777380	2777660	280	2777536	27	23	8	1	1	3	SRRM2, TCEB2, PRSS33	25207, -240, 10071	downstream, upstream, downstream
hESC	689	16	3098449	3098656	207	3098464	33	27.7143	7	0	1	1	ZSCAN10	853	in gene
hESC	690	16	3457788	3457990	202	3457856	22	20.2857	7	1	0	1	NAA60	14202	in gene
hESC	691	16	4593111	4593354	243	4593216	30	23.875	8	0	0	1	C16orf96	54507	in gene
hESC	692	16	4957545	4958173	628	4957920	261	129.842	19	1	1	1	SEC14L5	-397	upstream
hESC	693	16	5033589	5034180	591	5033888	164	81.2632	19	1	2	3	NAGPA, NAGPA-AS1, C16orf89	53, 186, 32257	in gene, in gene, downstream
hESC	694	16	5071674	5071936	262	5071840	39	30.7778	9	1	2	2	C16orf89, ALG1	-5695, 31	upstream, in gene
hESC	695	16	5871386	5871687	301	5871520	31	24.5	10	0	0	1	RBFOX1	631738	in gene
hESC	696	16	6341994	6342285	291	6342080	25	21.5556	9	0	0	1	RBFOX1	1102298	in gene
hESC	697	16	6343198	6343474	276	6343328	35	24.3333	9	0	0	1	RBFOX1	1103546	in gene
hESC	698	16	7765294	7765512	218	7765424	20	17.2857	7	0	0	0
hESC	699	16	8966087	8966293	206	8966176	33	27.6667	6	0	1	2	USP7, LOC105371074	-2692, 4671	upstream, in gene
hESC	700	16	8983625	8984030	405	8983840	66	44.5833	12	0	0	0
hESC	701	16	9610776	9611079	303	9610912	32	23.2	10	0	0	1	LOC101927026	426248	in gene
hESC	702	16	9680150	9680363	213	9680256	42	36.2857	7	0	0	0
hESC	703	16	10876974	10877217	243	10877104	24	19.625	8	0	0	2	LOC105371080, CIITA	12372, 10892	in gene, in gene
hESC	704	16	11916039	11916272	233	11916112	21	18.2857	7	1	1	1	GSPT1	550	in gene
hESC	705	16	18042315	18042590	275	18042448	18	15.75	8	0	0	0
hESC	706	16	18801633	18801893	260	18801664	37	31	8	1	1	2	ARL6IP1, SMG1	-129, 124745	upstream, downstream
hESC	707	16	19555260	19555851	591	19555552	212	119.316	19	1	1	2	CCP110, C16orf62	31695, 479	downstream, in gene
hESC	708	16	20900456	20900940	484	20900672	85	54.8667	15	1	2	2	DCUN1D3, LYRM1	-433, 1867	upstream, in gene
hESC	709	16	22436924	22437145	221	22437024	15	13.1429	7	1	0	0
hESC	710	16	23149425	23149728	303	23149568	116	80.9	10	1	1	1	USP31	-298	upstream
hESC	711	16	23557376	23557626	250	23557472	29	24.75	8	1	3	3	EARS2, UBFD1, LOC105371140	-97, -69, -3334	upstream, upstream, upstream
hESC	712	16	24099004	24099219	215	24099040	36	29.8571	7	0	0	2	PRKCB, LOC105371141	263061, 17687	in gene, downstream
hESC	713	16	24610069	24610423	354	24610240	61	44	11	0	0	0
hESC	714	16	25107043	25107291	248	25107216	48	41.2857	7	1	1	2	LCMT1-AS1, LCMT1	4339, -4510	in gene, upstream
hESC	715	16	25855860	25856068	208	25855952	22	20.1429	7	0	0	1	HS3ST4	163926	in gene
hESC	716	16	25950635	25951161	526	25950896	71	52.4375	16	0	0	1	HS3ST4	258870	in gene
hESC	717	16	27982212	27982464	252	27982352	38	31.625	8	0	0	1	GSG1L	81157	in gene
hESC	718	16	28212038	28212320	282	28212192	53	42.2222	9	1	1	1	XPO6	-232	upstream
hESC	719	16	28491933	28492375	442	28492160	134	80.2143	14	1	3	4	CLN3, LOC105371165, APOBR, IL27	142, -208, -2489, 34239	in gene, upstream, upstream, downstream
hESC	720	16	28974564	28974963	399	28974752	102	71.3333	12	1	1	3	NFATC2IP, SPNS1, LAT	23764, -19, -10074	downstream, upstream, upstream
hESC	721	16	29973303	29973604	301	29973424	30	24.4	10	1	1	2	TMEM219, TAOK2	11394, -217	downstream, upstream
hESC	722	16	30407285	30407499	214	30407328	23	19.7143	7	1	1	2	ZNF48, ZNF771	29016, -86	downstream, upstream
hESC	723	16	30534796	30535138	342	30534944	43	33.3636	11	1	1	2	ZNF768, ZNF747	-8355, 26	upstream, in gene
hESC	724	16	30558221	30558673	452	30558464	56	39.2857	14	1	1	1	ZNF764	-143	upstream
hESC	725	16	30571724	30572288	564	30572064	110	61.2778	18	1	1	2	ZNF688, ZNF785	431, 14357	in gene, downstream
hESC	726	16	30585624	30585915	291	30585792	38	30.8889	9	1	1	1	ZNF785	629	in gene
hESC	727	16	30610357	30610574	217	30610464	30	26.7143	7	1	1	1	ZNF689	311	in gene
hESC	728	16	30650441	30650801	360	30650624	73	52.5455	11	1	1	2	PRR14, FBRS	-93, -7807	upstream, upstream
hESC	729	16	30678035	30678451	416	30678256	37	28.4615	13	0	0	1	FBRS	19825	downstream
hESC	730	16	30922530	30923301	771	30922656	72	47.9583	24	1	2	2	FBXL19-AS1, FBXL19	613, -399	in gene, upstream
hESC	731	16	31073497	31073701	204	31073632	28	22.8571	7	1	2	3	ZNF668, ZNF646, PRSS53	688, -124, 16403	in gene, upstream, downstream
hESC	732	16	31472758	31473000	242	31472928	45	36.875	8	0	1	3	ARMC5, TGFB1I1, SLC5A2	14655, 773, -9607	downstream, in gene, upstream
hESC	733	16	46633219	46633424	205	46633344	22	19.8333	6	0	0	0
hESC	734	16	49701878	49702185	307	49702016	41	30.7	10	0	0	1	ZNF423	155903	in gene
hESC	735	16	53044227	53044461	234	53044288	29	25.7143	7	0	0	1	LOC105371267	8629	in gene
hESC	736	16	53703863	53704073	210	53703984	32	29.1429	7	1	2	2	RPGRIP1L, FTO	-125, 21	upstream, in gene
hESC	737	16	54331388	54331614	226	54331520	32	27.7143	7	0	0	0
hESC	738	16	57284421	57284656	235	57284512	23	19.5714	7	1	1	1	PLLP	160	in gene
hESC	739	16	58684540	58684943	403	58684736	97	64	13	1	2	2	SLC38A7, LOC105371297	41, 67	in gene, in gene
hESC	740	16	58862696	58862899	203	58862800	31	27.8333	6	0	0	1	LOC105371296	17581	in gene
hESC	741	16	62450463	62450670	207	62450528	18	14.7143	7	0	0	0
hESC	742	16	65318848	65319136	288	65318976	25	20.4	10	0	0	1	LINC00922	257324	in gene
hESC	743	16	67480907	67481393	486	67481168	125	75.7333	15	1	2	3	ATP6V0D1, LOC101927837, AGRP	18, -152, 2915	in gene, upstream, downstream
hESC	744	16	68778910	68779148	238	68779040	37	28.875	8	0	0	1	CDH1	41748	in gene
hESC	745	16	69078066	69078343	277	69078192	58	45.3333	9	0	0	1	TANGO6	234639	in gene
hESC	746	16	70251731	70252073	342	70251872	41	30.8182	11	1	1	2	EXOSC6, AARS	58, 37678	in gene, downstream
hESC	747	16	70613025	70613426	401	70613312	17	14.5	12	0	0	1	IL34	33417	in gene
hESC	748	16	72093547	72093844	297	72093648	25	22.4444	9	1	2	2	TXNL4B, DHX38	668, -17	in gene, upstream
hESC	749	16	72722667	72722904	237	72722752	42	34.5714	7	0	0	0
hESC	750	16	74100554	74100843	289	74100704	27	22.5556	9	0	0	0
hESC	751	16	75116031	75116233	202	75116128	20	18.1429	7	0	1	2	ZNRF1, LDHD	117111, 644	downstream, in gene
hESC	752	16	75148198	75148534	336	75148320	45	33	10	1	0	1	ZFP1	15811	in gene
hESC	753	16	75495346	75495601	255	75495488	29	23.625	8	1	1	1	CHST6	-54	upstream
hESC	754	16	77967124	77967769	645	77967424	66	39	20	0	0	1	VAT1L	178860	in gene
hESC	755	16	79299217	79299593	376	79299296	26	21.0833	12	0	0	1	MAF	301490	in gene
hESC	756	16	83602903	83603215	312	83603072	32	23.5	10	0	0	1	CDH13	976278	in gene
hESC	757	16	84684268	84684563	295	84684480	30	26.3333	9	0	0	0
hESC	758	16	84844642	84844847	205	84844752	26	22.6667	6	0	0	1	CRISPLD2	24771	in gene
hESC	759	16	85328261	85328616	355	85328448	60	43.9091	11	0	0	1	GSE1	158445	in gene
hESC	760	16	87388415	87388694	279	87388544	46	34.6667	9	0	2	3	FBXO31, TRM-CAT6-1, MAP1LC3B	3563, -4450, -3651	in gene, upstream, upstream
hESC	761	16	87392040	87392364	324	87392192	54	39.6	10	1	2	3	FBXO31, TRM-CAT6-1, MAP1LC3B	-85, -8098, -3	upstream, upstream, upstream
hESC	762	16	88856879	88857350	471	88857152	64	39.3333	15	1	3	4	GALNS, LOC105371408, TRAPPC2L, PABPN1L	-186, -573, 54, 13004	upstream, upstream, in gene, downstream
hESC	763	16	89290958	89291187	229	89291008	32	27.8571	7	0	1	2	ANKRD11, LOC105371414	199566, -5077	in gene, upstream
hESC	764	16	89686686	89686912	226	89686752	29	23.25	8	1	1	3	CDK10, LOC105371416, SPATA2L	14505, -1454, 14961	in gene, upstream, downstream
hESC	765	16	89958121	89958356	235	89958208	38	31.8571	7	0	0	1	DEF8	9511	in gene
hESC	766	17	215731	216367	636	215872	41	24.4	20	0	0	1	RPH3AL	170382	in gene
hESC	767	17	259897	260251	354	260064	29	23.1818	11	0	0	2	RPH3AL, LOC105371428	126190, 7246	in gene, in gene
hESC	768	17	1399823	1400216	393	1399968	28	19.8333	12	1	1	1	YWHAE	407	in gene
hESC	769	17	1724514	1724846	332	1724672	53	39.1	10	1	0	2	MIR22HG, WDR81	-8400, 8149	upstream, in gene
hESC	770	17	1829820	1830167	347	1829984	45	31.0909	11	1	2	2	SMYD4, RPA1	-103, 5	upstream, in gene
hESC	771	17	2042026	2042257	231	2042096	28	24.7143	7	1	1	4	DPH1, OVCA2, MIR132, MIR212	11959, 113, 7912, 8284	in gene, in gene, downstream, downstream
hESC	772	17	3636349	3636896	547	3636672	91	50.1111	18	1	2	3	SHPK, CTNS, LOC105371493	-350, 204, 15083	upstream, in gene, downstream
hESC	773	17	4396255	4396523	268	4396352	28	22.8889	9	0	0	0
hESC	774	17	4987442	4987712	270	4987584	24	20.1111	9	1	2	3	CAMTA2, LOC101927979, INCA1	89, -98, 10338	in gene, upstream, downstream
hESC	775	17	5191610	5191871	261	5191760	27	22.75	8	1	2	2	ZNF594, LOC100130950	123, -324	in gene, upstream
hESC	776	17	5897305	5897642	337	5897520	26	21.7273	11	0	0	1	LOC339166	125286	in gene
hESC	777	17	6139034	6139420	386	6139200	71	47.8333	12	0	0	0
hESC	778	17	6492891	6493321	430	6493072	107	65.4286	14	0	0	1	PITPNM3	63485	in gene
hESC	779	17	7012164	7012631	467	7012400	81	61.7143	14	1	4	8	ALOX12-AS1, ALOX12, RNASEK-C17orf49, RNASEK, C17orf49, MIR497HG, MIR195, MIR497	-66, 18204, -17, -17, -2337, 7254, 5301, 5622	upstream, downstream, upstream, upstream, upstream, downstream, downstream, downstream
hESC	780	17	7132815	7133057	242	7132896	35	29.75	8	0	1	1	LOC105371512	1632	in gene
hESC	781	17	7204955	7205232	277	7205056	36	31.3333	9	1	0	1	DLG4	14994	in gene
hESC	782	17	7234360	7234819	459	7234624	94	60.8	15	1	1	5	ACADVL, DVL2, PHF23, GABARAP, CTDNEP1	17499, -76, 5093, 7810, 17316	downstream, upstream, downstream, downstream, downstream
hESC	783	17	7242377	7243195	818	7242976	83	42.92	25	1	2	5	DVL2, PHF23, GABARAP, CTDNEP1, ELP5	-8428, -3259, -542, 8964, -9077	upstream, upstream, upstream, downstream, upstream
hESC	784	17	7484264	7484474	210	7484352	22	20.1667	6	1	2	3	ZBTB4, SLC35G6, POLR2A	-103, 2950, -27	upstream, downstream, upstream
hESC	785	17	7572413	7572839	426	7572528	36	27	14	1	5	9	SENP3-EIF4A1, SENP3, EIF4A1, SNORA48, SNORD10, SNORA67, CD68, LOC100996842, LOC102724164	10536, 10536, -178, -2185, -4283, -5427, -6959, 12256, 11286	in gene, downstream, upstream, upstream, upstream, upstream, upstream, downstream, downstream
hESC	786	17	7583729	7584120	391	7583968	63	46.3333	12	1	3	11	SENP3-EIF4A1, EIF4A1, SNORA48, SNORD10, SNORA67, CD68, LOC100996842, LOC102724164, MPDU1, SOX15, FXR2	21976, 11262, 9255, 7157, 6013, 4481, 816, -154, 321, 6202, 30929	downstream, downstream, downstream, downstream, downstream, downstream, in gene, upstream, in gene, downstream, downstream
hESC	787	17	7627820	7628028	208	7627840	20	17.5	6	1	1	2	SHBG, SAT2	13776, 36	in gene, in gene
hESC	788	17	8295309	8295562	253	8295360	31	25.5	8	1	2	4	SLC25A35, RANGRF, LOC105376801, LOC105376800	40, 6973, -114, -8641	in gene, downstream, upstream, upstream
hESC	789	17	8376760	8376988	228	8376864	42	35.7143	7	1	1	3	LOC105371523, KRBA2, RPL26	11295, -153, 6383	in gene, upstream, downstream
hESC	790	17	8383151	8383497	346	8383328	26	21.4545	11	1	2	4	LOC105371523, KRBA2, RPL26, RNF222	17759, -6617, -81, 14505	downstream, upstream, upstream, downstream
hESC	791	17	9322400	9322602	202	9322496	25	22	7	0	0	1	STX8	253462	in gene
hESC	792	17	11668773	11669018	245	11668880	37	31.4286	7	0	0	1	DNAH9	70449	in gene
hESC	793	17	12719970	12720285	315	12720096	43	33.7778	9	0	0	1	MYOCD	54206	in gene
hESC	794	17	13576025	13576246	221	13576096	21	18.4286	7	0	0	1	HS3ST3A1	25878	in gene
hESC	795	17	14559576	14559953	377	14559696	14	12.75	12	0	0	0
hESC	796	17	15180221	15180425	204	15180272	26	21.8571	7	0	0	1	LOC105371547	5175	in gene
hESC	797	17	16438570	16438804	234	16438656	38	32.2857	7	0	4	6	TRPV2, LRRC75A-AS1, SNORD49B, SNORD49A, SNORD65, LRRC75A	23114, -331, -853, -1380, -2570, 53535	downstream, upstream, upstream, upstream, upstream, downstream
hESC	798	17	18315127	18315435	308	18315280	32	24.7	10	1	2	2	TOP3A, SMCR8	-273, 0	upstream, in gene
hESC	799	17	19647372	19647596	224	19647472	28	25.4286	7	0	1	1	ALDH3A2	-664	upstream
hESC	800	17	20133394	20133918	524	20133696	26	17.8125	16	0	0	1	SPECC1	124360	in gene
hESC	801	17	27915747	27915950	203	27915840	42	38.3333	6	0	0	0
hESC	802	17	28357536	28357762	226	28357664	29	21	8	1	3	5	POLDIP2, TMEM199, MIR4723, SEBOX, VTN	-75, 83, -2990, 7487, 12688	upstream, in gene, upstream, downstream, downstream
hESC	803	17	28644973	28645594	621	28645184	246	134.737	19	1	1	2	KIAA0100, SDF2	-25, 17005	upstream, downstream
hESC	804	17	28717545	28717839	294	28717664	21	17.7778	9	1	8	10	PROCA1, RAB34, NARR, RPL23A, SNORD42B, SNORD4A, SNORD42A, SNORD4B, TLCD1, NEK8	-5593, 604, 226, -2318, -2886, -4918, -5766, -6017, 10271, -8233	upstream, in gene, in gene, upstream, upstream, upstream, upstream, upstream, downstream, upstream
hESC	805	17	29032813	29033062	249	29032928	35	25.5	8	0	0	1	PIPOX	-9972	upstream
hESC	806	17	29294098	29294301	203	29294208	42	37.1667	6	1	1	1	NUFIP2	-60	upstream
hESC	807	17	36773141	36773384	243	36773264	19	16.5	8	0	0	0
hESC	808	17	37609368	37609733	365	37609472	34	27.3333	12	1	1	3	SYNRG, DDX52, MIR378J	24, 33992, 5567	in gene, downstream, downstream
hESC	809	17	39461229	39461507	278	39461344	39	30.2222	9	1	1	2	MED1, CDK12	-10064, -142	upstream, upstream
hESC	810	17	39689127	39689435	308	39689312	43	35	9	0	2	2	PGAP3, ERBB2	-1242, 1228	upstream, in gene
hESC	811	17	40054263	40054794	531	40054528	174	99.2941	17	1	2	2	MED24, THRA	108, -7665	in gene, upstream
hESC	812	17	40295875	40296141	266	40296000	69	57.625	8	0	0	1	CDC6	8311	in gene
hESC	813	17	40464942	40465151	209	40465024	27	25.5	6	0	0	1	IGFBP4	21600	downstream
hESC	814	17	40596616	40596927	311	40596736	52	38.6667	9	0	0	0
hESC	815	17	41786283	41786523	240	41786416	28	25.1429	7	1	1	1	JUP	296	in gene
hESC	816	17	42017178	42017465	287	42017344	36	29.4444	9	1	1	3	DNAJC7, NKIRAS2, ZNF385C	4027, -217, 55286	in gene, upstream, downstream
hESC	817	17	42329496	42329705	209	42329552	25	23.1429	7	0	0	1	STAT3	58951	in gene
hESC	818	17	44014952	44015159	207	44015072	32	27.8333	6	1	0	3	PYY, NAGS, TMEM101	9188, 10526, 9188	in gene, downstream, in gene
hESC	819	17	44324575	44325186	611	44324896	208	95.65	20	1	1	2	RUNDC3A, SLC25A39	16978, -39	downstream, upstream
hESC	820	17	44326846	44327367	521	44327040	250	119.882	17	0	1	2	RUNDC3A, SLC25A39	19122, -2183	downstream, upstream
hESC	821	17	44344884	44345343	459	44345088	142	86.6429	14	0	1	2	GRN, FAM171A2	2, 18779	in gene, downstream
hESC	822	17	44557103	44557447	344	44557248	53	38	11	1	1	1	FZD2	-196	upstream
hESC	823	17	45161305	45161586	281	45161472	31	23.3333	9	1	1	3	HEXIM1, HEXIM2, LOC105371795	14155, 1446, 11171	downstream, in gene, downstream
hESC	824	17	47067296	47067501	205	47067344	25	22.7143	7	0	0	1	LOC101927060	32938	in gene
hESC	825	17	48160514	48160856	342	48160672	32	24.7	10	0	1	2	SKAP1, MIR1203	269563, -4161	in gene, upstream
hESC	826	17	48520717	48520928	211	48520800	20	17.1429	7	0	0	2	LOC105371808, HOXB1	6707, 10110	in gene, downstream
hESC	827	17	49788256	49788717	461	49788512	165	92.7333	15	1	1	1	KAT7	-107	upstream
hESC	828	17	50550789	50551089	300	50550912	40	30.4444	9	0	0	4	EPN3, SPATA20, CACNA1G-AS1, CACNA1G	18225, 3823, 11196, -10156	downstream, in gene, downstream, upstream
hESC	829	17	50719614	50719819	205	50719680	19	17.1429	7	1	1	1	LUC7L3	115	in gene
hESC	830	17	54626270	54626533	263	54626400	31	24.3333	9	0	0	1	LOC105371832	44084	in gene
hESC	831	17	57311317	57311573	256	57311440	27	22.5	8	0	0	1	MSI2	54870	in gene
hESC	832	17	57466201	57466440	239	57466272	32	26.25	8	0	0	1	MSI2	209702	in gene
hESC	833	17	58658106	58658326	220	58658192	32	27.8571	7	0	0	2	TEX14, LOC105371842	33887, 25272	in gene, downstream
hESC	834	17	61245727	61246039	312	61245824	38	28.7	10	0	0	1	BCAS3	568013	in gene
hESC	835	17	62705848	62706172	324	62705968	39	30.6	10	0	1	2	MARCH10, LOC105371855	102413, 20	in gene, in gene
hESC	836	17	62761879	62762250	371	62762000	29	23.8333	12	0	0	2	MARCH10, LOC105371855	46381, 56052	in gene, downstream
hESC	837	17	62824729	62824997	268	62824832	37	26.7778	9	0	0	1	LOC101927877	16365	in gene
hESC	838	17	63827090	63827325	235	63827232	42	35	7	1	2	4	DDX42, FTSJ3, PSMC5, SMARCD2	53348, 439, -178, 15759	downstream, in gene, upstream, downstream
hESC	839	17	64148004	64148327	323	64148128	19	16.5	10	0	2	4	LOC105376843, SNORD104, SNORA76C, TEX2	3178, 2050, 1789, 115195	downstream, downstream, downstream, in gene
hESC	840	17	64497174	64497383	209	64497232	25	22.8571	7	1	1	5	POLG2, DDX5, MIR3064, MIR5047, CEP95	-166, 9692, 3607, 4081, -9530	upstream, downstream, downstream, downstream, upstream
hESC	841	17	66304886	66305149	263	66305024	35	29	8	0	1	1	PRKCA	2242	in gene
hESC	842	17	67752394	67752629	235	67752512	33	26.8571	7	0	0	1	NOL11	34679	downstream
hESC	843	17	69448593	69448818	225	69448672	31	27.5714	7	0	0	1	MAP2K6	33975	in gene
hESC	844	17	70987802	70988099	297	70987952	33	27.2	10	0	0	0
hESC	845	17	71032753	71033249	496	71032928	80	55.875	16	0	0	0
hESC	846	17	72030403	72030648	245	72030528	21	19.2857	7	0	2	3	LOC102723505, LINC01152, LOC102723517	-4549, -126, 27206	upstream, upstream, downstream
hESC	847	17	73821045	73821278	233	73821168	33	30	7	0	0	1	LINC00469	7369	in gene
hESC	848	17	74245421	74245687	266	74245504	37	30.75	8	0	0	1	TTYH2	31947	in gene
hESC	849	17	74442858	74443116	258	74442960	32	27.5	8	0	0	1	GPRC5C	18457	in gene
hESC	850	17	74513918	74515069	1151	74514272	91	56.4444	36	0	0	1	CD300LB	17202	downstream
hESC	851	17	75855359	75855579	220	75855456	45	40.8571	7	1	1	1	WBP2	-36	upstream
hESC	852	17	76353887	76354199	312	76354016	75	52.1	10	1	1	1	PRPSAP1	133	in gene
hESC	853	17	76969076	76969308	232	76969216	27	24.1429	7	1	1	1	LOC105371899	-17	upstream
hESC	854	17	77786973	77787248	275	77787088	35	28.5556	9	0	0	0
hESC	855	17	77924759	77925010	251	77924864	35	28.75	8	0	1	1	LOC105371909	-1366	upstream
hESC	856	17	77958323	77958593	270	77958496	27	20.1111	9	1	0	0
hESC	857	17	78168318	78168642	324	78168432	32	24.0909	11	1	1	3	C17orf99, SYNGR2, TK1	22392, -119, 18772	downstream, upstream, downstream
hESC	858	17	78974993	78975377	384	78975136	71	49.75	12	0	0	1	LGALS3BP	4843	in gene
hESC	859	17	79192805	79193335	530	79193045	24	19.1875	16	0	0	2	RBFOX3, LOC105371916	418056, 9778	in gene, downstream
hESC	860	17	80827687	80828012	325	80827840	49	38.6	10	0	0	1	RPTOR	283015	in gene
hESC	861	17	81393901	81394227	326	81394048	77	54.5	10	1	2	3	LOC100130370, BAHCC1, MIR4740	-7251, -1416, 6730	upstream, upstream, downstream
hESC	862	17	81520027	81520562	535	81520288	42	30.8235	17	1	1	3	LOC105371928, ACTG1, FSCN2	28449, -7422, 7237	downstream, upstream, in gene
hESC	863	17	81867437	81867819	382	81867552	29	20.5	12	0	1	2	P4HB, ARHGDIA	-6884, 3854	upstream, downstream
hESC	864	17	81927686	81927918	232	81927744	29	25.2857	7	1	1	4	SIRT7, MAFG, MAFG-AS1, PYCR1	-9562, 3816, -85, 9584	upstream, in gene, upstream, downstream
hESC	865	17	82497068	82497399	331	82497216	37	25.9	10	1	1	2	NARF, TRX-CAT1-2	39032, -2424	downstream, upstream
hESC	866	18	839486	839705	219	839616	31	26.5714	7	0	0	0
hESC	867	18	3603534	3603951	417	3603744	83	56	13	0	1	3	DLGAP1, DLGAP1-AS1, DLGAP1-AS2	851566, 9630, 7	in gene, downstream, in gene
hESC	868	18	4233674	4233876	202	4233712	20	17.8333	6	0	0	1	DLGAP1	221598	in gene
hESC	869	18	4854740	4855026	286	4854880	39	29.5556	9	0	0	0
hESC	870	18	6752552	6752928	376	6752704	109	73.3333	12	0	0	1	ARHGAP28	22986	in gene
hESC	871	18	8084311	8084582	271	8084448	45	37	9	0	0	1	PTPRM	517132	in gene
hESC	872	18	8662353	8662579	226	8662464	26	22.7143	7	0	0	0
hESC	873	18	9136476	9136986	510	9136768	61	37.75	16	1	2	4	NDUFV2, NDUFV2-AS1, ANKRD12, LOC102724383	34138, -48, 15, 34496	downstream, upstream, in gene, downstream
hESC	874	18	12948339	12948541	202	12948480	19	16.5	6	1	1	1	SEH1L	496	in gene
hESC	875	18	21386978	21387194	216	21387024	25	22	6	0	0	2	GREB1L, LOC101927521	144782, 64030	in gene, in gene
hESC	876	18	24233807	24234136	329	24233920	28	22.9	10	0	0	1	OSBPL1A	163962	in gene
hESC	877	18	26956929	26957221	292	26957072	35	29.5556	9	0	0	1	CHST9	228266	in gene
hESC	878	18	27561642	27561931	289	27561776	67	51.7778	9	0	0	0
hESC	879	18	29711977	29712264	287	29712112	30	24.4444	9	0	0	0
hESC	880	18	29862894	29863139	245	29863008	38	30.25	8	0	0	0
hESC	881	18	35851297	35851585	288	35851440	31	24.2222	9	0	0	0
hESC	882	18	37160187	37160389	202	37160256	27	22	7	0	0	1	KIAA1328	331147	in gene
hESC	883	18	37577160	37577401	241	37577280	39	34.5714	7	0	0	0
hESC	884	18	44943508	44943834	326	44943616	37	27.2	10	0	0	1	SETBP1	263443	in gene
hESC	885	18	48959802	48960176	374	48959968	95	65.0833	12	0	0	2	SMAD7, LOC105372108	-9257, 4777	upstream, downstream
hESC	886	18	49492419	49492732	313	49492576	50	41.4444	9	1	7	8	RPL17-C18orf32, C18orf32, MIR1539, RPL17, SNORD58C, SNORD58A, SNORD58B, LOC101928144	-11, -5302, 5203, -11, -3252, -1229, -847, -6744	upstream, upstream, downstream, upstream, upstream, upstream, upstream, upstream
hESC	887	18	50287617	50288282	665	50287904	226	123.7	20	1	2	2	MBD1, CXXC1	-6130, 418	upstream, in gene
hESC	888	18	51654803	51655032	229	51654880	31	27.1429	7	0	1	1	LOC105372120	1553	in gene
hESC	889	18	54247102	54247304	202	54247200	25	20.8571	7	0	0	0
hESC	890	18	54269012	54269802	790	54269376	251	108.72	25	1	1	1	POLI	-103	upstream
hESC	891	18	54269946	54270232	286	54270064	24	20.8889	9	1	1	1	POLI	585	in gene
hESC	892	18	58512182	58512428	246	58512288	32	27.125	8	0	0	1	ALPK2	116900	in gene
hESC	893	18	58847322	58847838	516	58847632	32	26.3125	16	0	0	0
hESC	894	18	58867336	58867679	343	58867536	26	22.9	10	0	0	1	ZNF532	4936	in gene
hESC	895	18	59690263	59690675	412	59690464	42	28.9231	13	0	0	2	CCBE1, LOC105372148	7179, 4638	in gene, in gene
hESC	896	18	59904857	59905289	432	59905072	27	23.2857	14	0	0	1	PMAIP1	5112	downstream
hESC	897	18	60804520	60804745	225	60804608	30	25.5714	7	0	0	1	HMGN1P31	-9705	upstream
hESC	898	18	61637862	61638257	395	61638048	73	50.0833	12	0	0	0
hESC	899	18	75350470	75350804	334	75350656	44	32.4	10	0	0	0
hESC	900	18	76967973	76968354	381	76968160	26	20.0833	12	0	0	1	ZNF236	145599	in gene
hESC	901	18	77754720	77754951	231	77754848	31	25.125	8	0	0	0
hESC	902	18	78138917	78139127	210	78139072	25	21.5	6	0	0	0
hESC	903	18	79182091	79182498	407	79182208	50	33.6923	13	0	0	1	ATP9B	134614	in gene
hESC	904	19	290270	290679	409	290421	25	21.0769	13	1	1	1	PPAP2C	1014	in gene
hESC	905	19	507109	507905	796	507360	197	91.68	25	2	2	3	LOC105372232, MADCAM1, TPGS1	99, 10870, -137	in gene, downstream, upstream
hESC	906	19	597289	598049	760	597728	135	79.4167	24	0	0	1	HCN2	7835	in gene
hESC	907	19	796737	797438	701	797056	208	101.571	21	1	1	2	PTBP1, MIR4745	-336, -7884	upstream, upstream
hESC	908	19	925438	925728	290	925568	50	36	10	1	1	2	KISS1R, ARID3A	8226, -469	downstream, upstream
hESC	909	19	1259279	1259547	268	1259408	22	20	8	0	0	4	MIDN, LOC105372236, CIRBP-AS1, CIRBP	10855, 5194, 10852, -9858	downstream, downstream, downstream, upstream
hESC	910	19	1275153	1275452	299	1275328	25	21	9	1	2	3	CIRBP-AS1, CIRBP, C19orf24	-5068, 6062, -193	upstream, downstream, upstream
hESC	911	19	2061507	2061964	457	2061728	103	65.4286	14	1	0	1	MOB3A	34774	downstream
hESC	912	19	2273660	2273939	279	2273744	21	17.4444	9	1	1	3	LOC105372240, OAZ1, C19orf35	-4323, 4258, 8438	upstream, downstream, downstream
hESC	913	19	2427590	2428097	507	2427904	36	28.25	16	1	1	4	TMPRSS9, TIMM13, LMNB2, MIR7108	42669, 12, 29064, 7096	downstream, in gene, downstream, downstream
hESC	914	19	2840866	2841068	202	2840896	16	13.8333	6	1	1	2	ZNF554, ZNF555	21022, -539	downstream, upstream
hESC	915	19	2984024	2984299	275	2984128	48	36.5556	9	0	0	1	TLE6	6713	in gene
hESC	916	19	3012873	3013299	426	3013056	60	38.6923	13	0	0	1	TLE2	34579	in gene
hESC	917	19	3479230	3479728	498	3479488	45	28.5	16	0	2	2	SMIM24, LOC105372246	1054, -2406	in gene, upstream
hESC	918	19	4791579	4791895	316	4791584	30	23.7	10	1	1	2	LOC105372251, FEM1A	15090, -132	downstream, upstream
hESC	919	19	5340947	5341197	250	5341088	28	21.25	8	1	1	2	PTPRS, LOC105372252	-285, 4641	upstream, downstream
hESC	920	19	5790718	5790998	280	5790832	38	31.8889	9	1	2	2	PRR22, DUS3L	-6067, 406	upstream, in gene
hESC	921	19	7522451	7522857	406	7522624	167	103.846	13	1	2	4	C19orf45, LOC105372261, ZNF358, MCOLN1	25065, 2330, 7342, 14	downstream, in gene, downstream, in gene
hESC	922	19	8120771	8120973	202	8120832	22	19	6	0	0	1	FBN3	28180	in gene
hESC	923	19	8592570	8592801	231	8592608	41	34.5	8	1	0	1	ADAMTS10	18145	in gene
hESC	924	19	10416785	10416987	202	10416832	36	33.1667	6	1	1	1	PDE4A	59	in gene
hESC	925	19	10502825	10503048	223	10502912	35	28.1429	7	1	1	2	KEAP1, S1PR5	466, 15080	in gene, downstream
hESC	926	19	10653815	10654228	413	10654016	83	57.9231	13	1	2	3	SLC44A2, ILF3-AS1, ILF3	51571, -144, -245	downstream, upstream, upstream
hESC	927	19	10701300	10701612	312	10701456	57	41.9	10	1	1	2	ILF3, QTRT1	47195, 20	downstream, in gene
hESC	928	19	11435297	11435711	414	11435488	183	120.667	12	1	2	2	CCDC151, PRKCSH	294, 231	in gene, in gene
hESC	929	19	12919114	12919399	285	12919248	35	29.4444	9	1	2	4	GCDH, SYCE2, MIR5695, FARSA	28119, 95, -1072, 14496	downstream, in gene, upstream, downstream
hESC	930	19	12933666	12933958	292	12933824	68	51.1111	9	1	3	3	FARSA, CALR, MIR6515	-80, -4776, -6660	upstream, upstream, upstream
hESC	931	19	13020221	13020423	202	13020288	20	16.4286	7	0	0	1	NFIX	24532	in gene
hESC	932	19	13116535	13116861	326	13116672	43	32.3	10	1	2	2	TRMT1, NACC1	895, -175	in gene, upstream
hESC	933	19	13163134	13163337	203	13163232	24	19.8571	7	1	0	1	IER2	12764	downstream
hESC	934	19	13164575	13164845	270	13164704	29	25.4444	9	0	0	1	IER2	14236	downstream
hESC	935	19	14247522	14247846	324	14247648	36	25.3	10	0	0	0
hESC	936	19	15125604	15125826	222	15125632	24	19.8571	7	1	1	1	ILVBL	167	in gene
hESC	937	19	16922110	16922464	354	16922208	29	21	12	0	0	1	CPAMD8	104610	in gene
hESC	938	19	17215322	17215653	331	17215488	64	48.1818	11	1	1	2	MYO9B, USE1	139709, 142	downstream, in gene
hESC	939	19	17932547	17933120	573	17932832	228	124.333	18	1	1	1	CCDC124	-183	upstream
hESC	940	19	18328613	18328880	267	18328789	24	21.625	8	0	1	2	LSM4, LOC105372300	-5598, 11216	upstream, downstream
hESC	941	19	18610777	18611026	249	18610832	25	22.75	8	0	1	2	CRLF1, TMEM59L	-3982, 3397	upstream, in gene
hESC	942	19	19489250	19489489	239	19489344	44	38.5714	7	0	0	1	GATAD2A	103511	in gene
hESC	943	19	19516052	19516285	233	19516144	26	23.5714	7	1	2	3	GATAD2A, TSSK6, NDUFA13	130311, -484, -66	downstream, upstream, upstream
hESC	944	19	19663625	19664019	394	19663808	105	69.4167	12	1	1	2	ATP13A1, ZNF101	4015, -4345	in gene, upstream
hESC	945	19	23117033	23117245	212	23117120	22	19.8333	6	1	1	1	ZNF730	145	in gene
hESC	946	19	28881013	28881378	365	28881184	38	27.0833	12	0	0	1	LOC105372350	11784	downstream
hESC	947	19	30545865	30546084	219	30545984	19	15.7143	7	0	0	1	ZNF536	320940	in gene
hESC	948	19	31419096	31419330	234	31419232	29	25.25	8	0	0	0
hESC	949	19	32345456	32345904	448	32345664	96	59.9286	14	1	1	2	ZNF507, LOC105372366	56, 4036	in gene, downstream
hESC	950	19	33521542	33521935	393	33521728	96	62.9167	12	1	2	2	PEPD, LOC105372370	165, -214	in gene, upstream
hESC	951	19	36838412	36838725	313	36838560	70	52.7	10	1	0	1	ZNF790	12227	in gene
hESC	952	19	37172664	37173026	362	37172832	115	71.5833	12	0	1	2	ZNF585A, ZNF585B	-91, 37717	upstream, downstream
hESC	953	19	37506444	37507204	760	37506784	93	52.0417	24	1	2	2	ZNF793-AS1, ZNF793	303, 337	in gene, in gene
hESC	954	19	37988892	37989111	219	37989024	31	26.4286	7	0	0	1	SIPA1L3	81803	in gene
hESC	955	19	37989808	37990095	287	37989888	36	28.7778	9	0	0	1	SIPA1L3	82667	in gene
hESC	956	19	38374376	38374903	527	38374496	64	40.375	16	1	1	3	CATSPERG, PSMD8, GGN	38713, -54, 14087	downstream, upstream, downstream
hESC	957	19	38831748	38832042	294	38831872	57	44.7778	9	1	1	2	ECH1, HNRNPL	-15, 20467	upstream, downstream
hESC	958	19	39265650	39265852	202	39265712	19	16.1667	6	1	1	1	IFNL2	-171	upstream
hESC	959	19	39303437	39303712	275	39303584	43	31.1111	9	0	0	2	IFNL1, LRFN1	7259, 17270	downstream, downstream
hESC	960	19	41189464	41189745	281	41189632	27	22.2222	9	0	1	2	LOC105376908, CYP2S1	3420, -3575	in gene, upstream
hESC	961	19	41364199	41364433	234	41364320	41	34.5714	7	1	2	2	B9D2, TMEM91	220, 354	in gene, in gene
hESC	962	19	42280352	42280614	262	42280416	32	24.8889	9	1	0	1	CIC	11879	in gene
hESC	963	19	42369922	42370328	406	42370112	25	20.4167	12	1	0	1	MEGF8	44503	in gene
hESC	964	19	42423248	42424192	944	42423808	115	58.8	30	1	0	3	LIPE-AS1, LIPE, CXCL17	26660, 3618, 19176	in gene, in gene, downstream
hESC	965	19	43983953	43984207	254	43984048	27	22.375	8	0	0	1	ZNF155	16345	in gene
hESC	966	19	44002788	44002994	206	44002848	29	25.3333	6	1	2	3	ZNF155, LOC101928063, ZNF230	35145, 22, -77	downstream, in gene, upstream
hESC	967	19	44259909	44260117	208	44259936	28	25.6667	6	1	1	1	ZNF233	56	in gene
hESC	968	19	44401479	44401883	404	44401664	134	89.5833	12	0	1	1	ZNF285	-53	upstream
hESC	969	19	45079622	45079826	204	45079696	26	24.6667	6	1	1	4	CLASRP, ZNF296, GEMIN7, LOC105372419	40656, -3266, 3957, 10579	downstream, upstream, in gene, downstream
hESC	970	19	45717477	45717713	236	45717568	58	48.2857	7	1	1	2	FBXO46, BHMG1	13325, -6324	in gene, upstream
hESC	971	19	47112886	47113107	221	47113056	20	18.2857	7	1	1	1	ZC3H4	696	in gene
hESC	972	19	47515250	47515583	333	47515392	116	84.2	10	1	1	2	NAPA, ZNF541	-134, 57846	upstream, downstream
hESC	973	19	47745257	47745767	510	47745424	63	41.125	16	1	1	2	EHD2, GLTSCR2	32080, -112	downstream, upstream
hESC	974	19	47849732	47849967	235	47849824	48	40.1429	7	0	0	1	CRX	27982	downstream
hESC	975	19	48111239	48111611	372	48111408	51	36.8182	11	0	1	2	PLA2G4C, LIG1	-555, 59195	upstream, downstream
hESC	976	19	48255740	48256113	373	48255904	72	48.5833	12	0	2	3	CARD8, CARD8-AS1, LOC105372429	373, 229, 15816	in gene, in gene, downstream
hESC	977	19	48624054	48624317	263	48624160	43	35.125	8	1	1	4	FAM83E, RPL18, SPHK2, DBP	-9319, -4742, 4869, 13390	upstream, upstream, in gene, downstream
hESC	978	19	48954567	48955071	504	48954784	115	66.8667	15	1	1	2	DHDH, BAX	21145, -76	downstream, upstream
hESC	979	19	49339473	49339681	208	49339584	26	22.2857	7	1	0	3	SLC6A16, CD37, TEAD2	-7883, 4219, 22873	upstream, in gene, downstream
hESC	980	19	49487167	49487698	531	49487344	94	62.1176	17	1	5	7	FLT3LG, RPL13A, SNORD32A, SNORD33, SNORD34, SNORD35A, RPS11	13172, -210, -2622, -3273, -3563, -3831, -9021	downstream, upstream, upstream, upstream, upstream, upstream, upstream
hESC	981	19	49495890	49496333	443	49496128	66	48.0714	14	1	2	9	FLT3LG, RPL13A, SNORD32A, SNORD33, SNORD34, SNORD35A, RPS11, SNORD35B, MIR150	21956, 8574, 6162, 5511, 5221, 4953, -237, -1591, 4740	downstream, downstream, downstream, downstream, downstream, downstream, upstream, upstream, downstream
hESC	982	19	49513245	49513457	212	49513360	17	15.4286	7	1	1	1	FCGRT	1081	in gene
hESC	983	19	49813284	49813828	544	49813664	83	56.4706	17	1	1	4	AP2A1, FUZ, LOC105372435, MED25	46741, 3712, 4832, -4615	downstream, in gene, downstream, upstream
hESC	984	19	49817974	49818342	368	49818144	86	56.75	12	1	2	3	FUZ, LOC105372435, MED25	-768, 9312, -135	upstream, downstream, upstream
hESC	985	19	49876483	49877626	1143	49876784	199	124.571	35	1	2	3	PNKP, AKT1S1, TBC1D17	-9219, 1572, -641	upstream, in gene, upstream
hESC	986	19	51293010	51293222	212	51293152	26	21.2857	7	0	0	1	LOC105372444	21915	in gene
hESC	987	19	51570924	51571349	425	51571136	143	89.0769	13	1	2	2	LOC105372490, ZNF175	-6316, -142	upstream, upstream
hESC	988	19	51887837	51888240	403	51888032	49	33.6923	13	1	1	3	ZNF577, ZNF649-AS1, ZNF649	2884, 7, 17020	in gene, in gene, downstream
hESC	989	19	51904869	51905246	377	51905056	74	51.0909	11	0	1	2	ZNF649-AS1, ZNF649	17031, -4	downstream, upstream
hESC	990	19	51927000	51927457	457	51927232	52	37.8	15	0	1	1	ZNF613	85	in gene
hESC	991	19	51986794	51987123	329	51986944	77	52.7	10	0	1	3	ZNF350-AS1, ZNF350, ZNF615	37810, -88, 21294	downstream, upstream, downstream
hESC	992	19	52008129	52008583	454	52008288	77	51.7857	14	1	1	2	ZNF615, ZNF614	-50, 20139	upstream, downstream
hESC	993	19	52028377	52028685	308	52028512	56	44.7	10	1	1	2	ZNF614, ZNF432	-85, 20308	upstream, downstream
hESC	994	19	52716672	52716887	215	52716720	39	33	7	0	0	1	ZNF611	18334	in gene
hESC	995	19	52942954	52943210	256	52943072	25	20	8	0	1	3	ZNF816-ZNF321P, ZNF321P, ZNF816	19839, -478, 19839	in gene, upstream, downstream
hESC	996	19	53595107	53595357	250	53595232	36	32.2857	7	0	1	1	DPRX	-5887	upstream
hESC	997	19	53869393	53869603	210	53869568	17	14.5714	7	1	1	2	LOC105372457, MYADM	153, 3984	in gene, in gene
hESC	998	19	53977576	53977799	223	53977696	30	25.7143	7	0	1	2	CACNG8, MIR935	14660, -4611	in gene, upstream
hESC	999	19	53978249	53978574	325	53978384	31	27.3	10	1	1	2	CACNG8, MIR935	15348, -3923	in gene, upstream
hESC	1000	19	53980770	53980999	229	53980896	21	17.5714	7	0	1	2	CACNG8, MIR935	17860, -1411	in gene, upstream
hESC	1001	19	54115587	54115792	205	54115616	26	23.3333	6	1	2	4	NDUFA3, TFPT, LOC105372458, PRPF31	12764, 59, 7214, 240	downstream, in gene, downstream, in gene
hESC	1002	19	55399922	55400140	218	55399984	21	17.8571	7	0	0	3	RPL28, UBE2S, LOC105372462	14883, 8162, -9449	in gene, downstream, upstream
hESC	1003	19	55599545	55600241	696	55599808	118	70.9545	22	1	3	3	FIZ1, ZNF524, LOC105376905	-112, 53, -5945	upstream, in gene, upstream
hESC	1004	19	55647770	55648223	453	55648032	86	57.5714	14	1	2	4	ZNF580, ZNF581, CCDC106, U2AF2	13129, 4412, 464, -6018	downstream, downstream, in gene, upstream
hESC	1005	19	57583693	57583957	264	57583776	30	23.375	8	1	3	3	ZNF416, LOC105372477, ZIK1	-4596, 1168, 134	upstream, in gene, in gene
hESC	1006	19	57830168	57830398	230	57830293	21	19.7143	7	0	1	1	ZNF587B	-1	upstream
hESC	1007	2	151933	152270	337	152064	25	18.7273	11	0	0	0
hESC	1008	2	284499	284701	202	284608	23	20.1667	6	0	1	3	ACP1, FAM150B, LOC101927262	20468, 4272, -1744	downstream, in gene, upstream
hESC	1009	2	677237	677618	381	677376	36	28.25	12	1	2	2	TMEM18, LOC105373354	63, -11	in gene, upstream
hESC	1010	2	1986690	1986980	290	1986816	60	45.6667	9	0	0	1	MYT1L	344559	in gene
hESC	1011	2	2788075	2788384	309	2788224	56	42.4	10	0	0	0
hESC	1012	2	5697158	5697370	212	5697264	22	20	6	1	1	3	LINC01248, SOX11, LOC105373442	-6146, 4597, 3686	upstream, in gene, in gene
hESC	1013	2	5726040	5726502	462	5726336	26	21.1333	15	0	0	0
hESC	1014	2	7431192	7431524	332	7431328	38	27.9091	11	1	0	1	LOC100506274	10067	in gene
hESC	1015	2	7891374	7891576	202	7891488	23	20.6667	6	0	1	3	LOC101929861, LOC105373409, LOC101929551	-6822, 10181, 8167	upstream, in gene, in gene
hESC	1016	2	7900020	7900300	280	7900128	41	30.1111	9	0	1	2	LOC105373409, LOC101929551	18821, -473	downstream, upstream
hESC	1017	2	9218098	9218376	278	9218272	41	31	9	0	0	1	ASAP2	11507	in gene
hESC	1018	2	11466090	11466344	254	11466240	24	20.75	8	1	1	1	E2F6	-63	upstream
hESC	1019	2	12083180	12083586	406	12083264	16	13.2308	13	0	0	1	LOC100506457	76148	in gene
hESC	1020	2	13611986	13612235	249	13612080	28	22.875	8	0	0	1	LOC105373438	3018	in gene
hESC	1021	2	14232262	14232480	218	14232304	25	21.4286	7	0	0	1	LINC00276	168654	in gene
hESC	1022	2	15119704	15119979	275	15119776	29	25.1111	9	0	0	1	LOC105373439	17664	in gene
hESC	1023	2	18560246	18561004	758	18560672	307	138.042	24	1	3	5	NT5C1B-RDH14, RDH14, LOC102724898, NT5C1B, LOC105373456	28908, 21, -297, 28908, -3270	in gene, in gene, upstream, downstream, upstream
hESC	1024	2	22784570	22784833	263	22784672	20	15.7778	9	0	0	0
hESC	1025	2	24793284	24793523	239	24793376	29	25.5714	7	1	3	3	PTRHD1, LOC105369164, CENPO	6, -258, 70	in gene, upstream, in gene
hESC	1026	2	24822106	24822364	258	24822240	43	36.25	8	0	0	3	CENPO, ADCY3, LOC105377626	28934, 97493, 12236	in gene, in gene, downstream
hESC	1027	2	25259727	25260012	285	25259840	49	37.8889	9	0	0	1	DNMT3A	82750	in gene
hESC	1028	2	27096075	27096485	410	27096320	106	64.3077	13	0	0	3	EMILIN1, KHK, CGREF1	17753, 9577, 22807	downstream, in gene, downstream
hESC	1029	2	27771596	27772025	429	27771776	46	34.8462	13	1	1	3	LOC105374378, MRPL33, RBKS	55708, 59, 118620	downstream, in gene, downstream
hESC	1030	2	30652251	30652517	266	30652384	37	27.5556	9	0	0	1	LCLAT1	205158	downstream
hESC	1031	2	33583678	33583925	247	33583776	32	25.25	8	0	0	1	FAM98A	15586	in gene
hESC	1032	2	36270799	36271104	305	36270912	56	40.5	10	0	0	0
hESC	1033	2	37671811	37672165	354	37672048	18	15.6364	11	1	1	1	CDC42EP3	487	in gene
hESC	1034	2	42568053	42568322	269	42568224	27	21.3333	9	0	0	1	MTA3	73655	in gene
hESC	1035	2	43100995	43101273	278	43101184	18	13.875	8	1	0	1	LOC100506047	57036	in gene
hESC	1036	2	43217898	43218411	513	43218080	76	42.6875	16	0	0	2	ZFP36L2, LINC01126	8526, -9131	downstream, upstream
hESC	1037	2	43995722	43996682	960	43996288	314	156.233	30	1	1	1	LRPPRC	-283	upstream
hESC	1038	2	44361408	44361967	559	44361632	102	56.5556	18	1	2	2	PREPL, CAMKMT	230, -272	in gene, upstream
hESC	1039	2	44778762	44779052	290	44778944	25	22	9	0	0	1	CAMKMT	417040	downstream
hESC	1040	2	44790421	44790663	242	44790496	29	24.875	8	0	0	0
hESC	1041	2	44801211	44801565	354	44801376	39	29.0909	11	0	0	0
hESC	1042	2	46500310	46500615	305	46500480	44	34.6	10	0	0	1	ATP6V1E2	41932	in gene
hESC	1043	2	46940683	46940954	271	46940768	33	25.5	8	1	1	2	MCFD2, TTC7A	1087, 24639	in gene, in gene
hESC	1044	2	50004698	50005056	358	50004816	35	27.5	12	0	0	1	NRXN1	1027720	in gene
hESC	1045	2	50225094	50225296	202	50225232	20	18.5	6	0	0	1	NRXN1	807304	in gene
hESC	1046	2	62505888	62506152	264	62505984	20	16.6667	9	1	1	1	TMEM17	485	in gene
hESC	1047	2	65077476	65077719	243	65077632	22	19.2857	7	0	0	3	CEP68, LOC105374779, RAB1A	21271, 4897, 52669	in gene, in gene, downstream
hESC	1048	2	65130083	65130285	202	65130176	26	22.6667	6	1	1	1	RAB1A	125	in gene
hESC	1049	2	65275294	65275531	237	65275360	26	19.75	8	0	0	1	ACTR2	47665	downstream
hESC	1050	2	65558221	65558445	224	65558240	25	21.2857	7	0	0	1	LOC105369166	81924	in gene
hESC	1051	2	67340281	67341775	1494	67340864	43	29.1277	47	0	0	0
hESC	1052	2	67927615	67927836	221	67927728	31	25.8571	7	0	0	0
hESC	1053	2	67930304	67930546	242	67930432	25	20.125	8	0	0	0
hESC	1054	2	69717986	69718370	384	69718144	52	37.9167	12	0	0	1	ANXA4	74044	in gene
hESC	1055	2	80008230	80008432	202	80008320	35	30.1667	6	0	0	1	CTNNA2	495386	in gene
hESC	1056	2	84958150	84958385	235	84958240	38	32.7143	7	0	0	1	LOC105374838	32209	in gene
hESC	1057	2	84959821	84960166	345	84959968	50	35.0909	11	0	0	1	LOC105374838	33937	in gene
hESC	1058	2	85135024	85135347	323	85135184	24	20	10	1	1	1	TCF7L1	1724	in gene
hESC	1059	2	85538591	85539239	648	85538912	72	47.0476	21	1	2	3	PARTICLE, MAT2A, GGCX	-26, -66, 22622	upstream, upstream, downstream
hESC	1060	2	85611568	85612647	1079	85612144	227	90.2059	34	1	1	3	TMEM150A, USP39, C2orf68	-9445, 9302, -88	upstream, in gene, upstream
hESC	1061	2	85615929	85616266	337	85616064	31	22.6364	11	1	1	2	USP39, C2orf68	13222, -4008	in gene, upstream
hESC	1062	2	86440556	86441102	546	86440704	32	26.0588	17	1	2	2	LOC105374844, KDM3A	269, 57	in gene, in gene
hESC	1063	2	88416061	88416308	247	88416160	30	25.75	8	0	0	0
hESC	1064	2	88857358	88857647	289	88857488	41	34	9	0	2	8	LOC105374856, IGK, IGKC, IGKJ5, IGKJ4, IGKJ3, IGKJ2, IGKJ1	-1878, 473191, 195, 3117, 3435, 3770, 4075, 4435	upstream, in gene, in gene, downstream, downstream, downstream, downstream, downstream
hESC	1065	2	97996001	97996247	246	97996064	39	33.5714	7	1	2	2	TMEM131, LOC105373500	-132, -1579	upstream, upstream
hESC	1066	2	99181028	99181349	321	99181184	26	20.8	10	1	2	2	MITD1, MRPL30	-123, 105	upstream, in gene
hESC	1067	2	101893675	101893996	321	101893792	36	27.7	10	0	0	1	MAP4K4	196089	in gene
hESC	1068	2	104127097	104127319	222	104127168	18	14.1429	7	0	0	1	LOC105373523	31167	in gene
hESC	1069	2	109102826	109103091	265	109102944	39	32.625	8	0	0	0
hESC	1070	2	110688841	110689108	267	110688960	50	41.25	8	0	0	1	LOC105373554	10772	in gene
hESC	1071	2	112584288	112584580	292	112584512	27	22.9	10	1	2	3	POLR1B, LOC101927330, CHCHD5	42597, 1186, 906	downstream, in gene, in gene
hESC	1072	2	120223075	120223413	338	120223248	39	29.7	10	1	0	0
hESC	1073	2	120466178	120466384	206	120466336	26	23.6667	6	0	1	1	LINC01101	13	in gene
hESC	1074	2	122516820	122517076	256	122516944	30	25.375	8	0	0	0
hESC	1075	2	127829904	127830230	326	127830048	38	29.6	10	0	0	0
hESC	1076	2	128289588	128289825	237	128289728	34	27.25	8	0	0	1	HS6ST1	28869	in gene
hESC	1077	2	130342327	130342976	649	130342752	67	43.2381	21	1	3	3	TRE-TTC1-2, CCDC115, IMP4	-5553, 58, -145	upstream, in gene, upstream
hESC	1078	2	132304628	132304912	284	132304736	38	29.8889	9	0	1	1	ZNF806	-2408	upstream
hESC	1079	2	133139957	133140196	239	133140096	33	26.5	8	0	0	1	NCKAP5	534827	in gene
hESC	1080	2	134119667	134119994	327	134119792	23	20	10	1	2	2	MGAT5, MIR3679	-138, -7333	upstream, upstream
hESC	1081	2	139369767	139370237	470	139369936	27	21.8571	14	0	0	1	LOC105373643	7673	in gene
hESC	1082	2	139721761	139722056	295	139721888	25	20.7778	9	0	0	0
hESC	1083	2	143891760	143892216	456	143892016	24	20.2143	14	0	0	0
hESC	1084	2	143906794	143907136	342	143906976	33	25.0909	11	0	0	0
hESC	1085	2	147469562	147469806	244	147469664	43	35.125	8	0	0	0
hESC	1086	2	148303248	148303519	271	148303328	26	22.25	8	0	0	1	MBD5	282317	in gene
hESC	1087	2	148578174	148578470	296	148578288	75	53.6	10	0	0	0
hESC	1088	2	148813641	148813902	261	148813739	29	26.25	8	0	0	0
hESC	1089	2	150735920	150736236	316	150736032	55	42.2	10	0	0	0
hESC	1090	2	159712199	159712463	264	159712288	30	23.875	8	1	2	2	BAZ2B, MARCH7	151, -169	in gene, upstream
hESC	1091	2	160055528	160055798	270	160055616	29	24.875	8	0	0	2	PLA2R1, LOC105373717	7286, 20556	in gene, in gene
hESC	1092	2	167332028	167332277	249	167332160	37	30.375	8	0	0	1	B3GALT1	39099	in gene
hESC	1093	2	168455996	168456219	223	168456117	19	17.8571	7	1	1	2	LOC102724081, CERS6	4104, -132	in gene, upstream
hESC	1094	2	168908344	168908550	206	168908448	27	23.2857	7	0	0	1	G6PC2	7208	in gene
hESC	1095	2	169789829	169790127	298	169790016	22	18.2222	9	0	0	1	SSB	-8796	upstream
hESC	1096	2	170717071	170717274	203	170717136	28	24.8333	6	1	2	3	LOC101926913, LINC01124, SP5	53630, -2569, 2398	in gene, upstream, in gene
hESC	1097	2	172380777	172381126	349	172380928	61	43.8182	11	0	0	0
hESC	1098	2	174771754	174772055	301	174771872	48	38.5556	9	0	1	2	CHRNA1, LOC105373750	-7400, 10194	upstream, downstream
hESC	1099	2	176082560	176082817	257	176082688	30	23.5556	9	1	1	2	EVX2, HOXD13	3109, -4817	in gene, upstream
hESC	1100	2	177263516	177263780	264	177263648	27	21.5556	9	1	1	2	NFE2L2, MIR3128	1483, -7638	in gene, upstream
hESC	1101	2	178212053	178212286	233	178212128	32	27.4286	7	0	0	1	OSBPL6	17647	in gene
hESC	1102	2	178219308	178219569	261	178219424	27	23	8	0	0	1	OSBPL6	24943	in gene
hESC	1103	2	180071909	180072136	227	180071968	27	21.4286	7	0	0	0
hESC	1104	2	180679766	180679970	204	180679808	30	25.4286	7	0	0	0
hESC	1105	2	183124309	183124618	309	183124448	26	21.6	10	0	0	1	NUP35	6958	in gene
hESC	1106	2	187676162	187676541	379	187676448	18	15.3636	11	0	0	0
hESC	1107	2	188033289	188033495	206	188033344	26	24.3333	6	0	0	1	LINC01090	254347	downstream
hESC	1108	2	190119438	190119655	217	190119536	24	21.4286	7	0	0	2	C2orf88, LOC105373794	239983, 21942	in gene, downstream
hESC	1109	2	193743072	193743376	304	193743216	36	27.7	10	0	0	0
hESC	1110	2	195656857	195657294	437	195657104	67	44.4286	14	1	0	1	SLC39A10	81127	in gene
hESC	1111	2	197434772	197435132	360	197434928	25	21.4545	11	1	1	1	SF3B1	163	in gene
hESC	1112	2	199842800	199843117	317	199842864	20	15.7	10	0	0	1	FTCDNL1	8309	in gene
hESC	1113	2	199955222	199955691	469	199955344	24	20.0667	15	1	2	2	TYW5, C2orf47	392, 27	in gene, in gene
hESC	1114	2	200811183	200811422	239	200811264	24	21.8571	7	1	2	2	LOC101927795, BZW1	906, -280	in gene, upstream
hESC	1115	2	205465819	205466143	324	205465984	49	34.6	10	0	0	1	PARD3B	920191	in gene
hESC	1116	2	205482475	205482829	354	205482592	33	24.8182	11	0	0	1	PARD3B	936799	in gene
hESC	1117	2	206083763	206084111	348	206083936	36	26.1818	11	0	2	2	INO80D, LOC105373849	2246, -317	in gene, upstream
hESC	1118	2	206159380	206159608	228	206159456	26	23	7	1	4	4	NDUFS1, EEF1B2, SNORD51, SNORA41	63, -138, -2425, -2772	in gene, upstream, upstream, upstream
hESC	1119	2	206462471	206462720	249	206462624	36	28.25	8	0	0	1	ADAM23	19080	in gene
hESC	1120	2	207769843	207770163	320	207770080	20	17.9	10	1	1	1	FZD5	-661	upstream
hESC	1121	2	209138197	209138530	333	209138288	14	12.6364	11	0	0	0
hESC	1122	2	209307521	209308087	566	209307920	31	23.9412	17	0	0	0
hESC	1123	2	209321369	209321617	248	209321456	17	15.875	8	0	0	0
hESC	1124	2	209614833	209615325	492	209615200	33	24.4667	15	0	0	1	MAP2	191153	in gene
hESC	1125	2	209818022	209818289	267	209818144	30	24.875	8	0	0	1	UNC80	46151	in gene
hESC	1126	2	214127236	214127499	263	214127328	23	18.375	8	0	0	1	SPAG16	842949	in gene
hESC	1127	2	217270184	217270479	295	217270320	55	42.6667	9	0	0	1	LOC105373877	10930	in gene
hESC	1128	2	218396094	218396550	456	218396336	72	51.6667	15	0	2	3	SLC11A1, CTDSP1, MIR26B	14570, -2002, -6310	in gene, upstream, upstream
hESC	1129	2	219565816	219566019	203	219565952	22	19.4286	7	0	1	2	OBSL1, INHA	5625, -6280	in gene, upstream
hESC	1130	2	219965363	219965615	252	219965440	37	30.375	8	0	0	1	LOC105373891	4780	in gene
hESC	1131	2	220417591	220417890	299	220417744	28	21.3	10	0	0	1	LOC105373893	311941	in gene
hESC	1132	2	223036813	223037142	329	223036944	42	32.5	10	0	0	0
hESC	1133	2	231370783	231370985	202	231370816	25	20.5714	7	0	0	2	ARMC9, MIR4777	172270, 8108	in gene, downstream
hESC	1134	2	231666272	231666673	401	231666368	33	24.3077	13	0	0	0
hESC	1135	2	231707046	231707438	392	231707232	70	55	12	1	2	2	PTMA, MIR1244-1	-1293, -6082	upstream, upstream
hESC	1136	2	231713851	231714081	230	231713952	28	24.375	8	0	1	2	PTMA, MIR1244-1	5427, 638	downstream, downstream
hESC	1137	2	233329753	233330073	320	233329888	81	57.4	10	0	0	1	SAG	25588	in gene
hESC	1138	2	234596763	234597071	308	234596928	21	17.9	10	0	0	1	LOC105373936	35777	in gene
hESC	1139	2	236086962	236087269	307	236087104	33	24.7	10	0	0	1	AGAP1	593015	in gene
hESC	1140	2	236965679	236965934	255	236965760	29	22.75	8	0	0	1	LOC105373951	14301	in gene
hESC	1141	2	237614334	237614546	212	237614432	33	28.5714	7	0	0	0
hESC	1142	2	238096403	238096745	342	238096576	33	25.4545	11	0	1	3	UBE2F-SCLY, SCLY, ESPNL	129631, 35652, -3734	in gene, in gene, upstream
hESC	1143	2	238657587	238657789	202	238657664	27	23.5	6	0	0	0
hESC	1144	2	241637263	241637741	478	241637456	82	54.6667	15	1	2	2	THAP4, ATG4B	69, -156	in gene, upstream
hESC	1145	20	543798	544108	310	543968	35	27.7	10	1	1	1	CSNK2A1	-130	upstream
hESC	1146	20	1427628	1427886	258	1427776	46	40	8	0	1	1	LOC102724529	-3204	upstream
hESC	1147	20	1722318	1722530	212	1722464	24	21.8571	7	0	0	1	LOC105369219	5102	in gene
hESC	1148	20	5750166	5750465	299	5750272	51	37.4	10	0	1	1	C20orf196	-63	upstream
hESC	1149	20	9572767	9573122	355	9572928	37	27.3333	12	0	0	2	PAK7, LOC105372523	266111, 9913	in gene, in gene
hESC	1150	20	10434850	10435506	656	10435136	232	104.85	20	0	2	2	MKKS, SLX4IP	-897, 589	upstream, in gene
hESC	1151	20	15976421	15976733	312	15976560	45	35.2222	9	0	0	2	MACROD2, LOC613266	1981060, 9322	in gene, in gene
hESC	1152	20	16940851	16941074	223	16940944	20	16.7143	7	0	0	0
hESC	1153	20	17968611	17968922	311	17968752	49	40.6667	9	1	3	3	SNX5, SNORD17, MGME1	239, -5806, -101	in gene, upstream, upstream
hESC	1154	20	19207594	19207829	235	19207680	33	28.1429	7	0	1	2	LOC101929547, SLC24A3	2817, -4966	downstream, upstream
hESC	1155	20	19620546	19620769	223	19620608	36	26.7143	7	0	0	1	SLC24A3	407962	in gene
hESC	1156	20	21189785	21190046	261	21189888	28	22.625	8	0	0	2	KIZ, KIZ-AS1	63905, 28401	in gene, downstream
hESC	1157	20	22430067	22430331	264	22430208	45	37.75	8	0	0	1	LOC284788	-9565	upstream
hESC	1158	20	22663584	22664010	426	22663744	37	23.4286	14	0	0	1	LOC105372566	22950	downstream
hESC	1159	20	23533197	23533486	289	23533344	45	34.4444	9	0	0	0
hESC	1160	20	24443592	24443794	202	24443712	21	18.8333	6	0	0	0
hESC	1161	20	31606579	31606781	202	31606736	27	25.1667	6	0	3	3	LOC105372588, ID1, MIR3193	-1546, 1453, -450	upstream, downstream, upstream
hESC	1162	20	32109269	32109946	677	32109568	71	43.9524	21	0	1	2	HCK, TM9SF4	57380, 62	downstream, in gene
hESC	1163	20	32780824	32781129	305	32780960	42	29.7	10	0	0	1	DNMT3B	18575	in gene
hESC	1164	20	35742160	35742562	402	35742400	51	36.3077	13	1	1	1	RBM39	-64	upstream
hESC	1165	20	38804686	38804934	248	38804816	26	21.625	8	0	1	1	PPP1R16B	-889	upstream
hESC	1166	20	38962119	38962399	280	38962240	49	38.75	8	1	1	2	FAM83D, DHX35	37162, -98	downstream, upstream
hESC	1167	20	39110595	39110836	241	39110672	30	25.2857	7	0	0	0
hESC	1168	20	39282653	39282961	308	39282800	57	41.6	10	0	0	0
hESC	1169	20	39899908	39900122	214	39900000	23	19.6667	6	0	0	0
hESC	1170	20	40407950	40408315	365	40408128	47	33.3636	11	0	0	0
hESC	1171	20	45853585	45853812	227	45853712	20	17.8571	7	0	1	2	ACOT8, ZSWIM3	3697, -3869	in gene, upstream
hESC	1172	20	45890959	45891560	601	45891296	161	87.1053	19	1	3	5	ZSWIM1, SPATA25, NEURL2, CTSA, PLTP	10354, -2643, -9, 344, 21068	downstream, upstream, upstream, in gene, downstream
hESC	1173	20	45933675	45934068	393	45933952	29	23.5833	12	1	1	1	PCIF1	-722	upstream
hESC	1174	20	46583682	46583916	234	46583808	44	36.1429	7	0	0	1	SLC13A3	100677	in gene
hESC	1175	20	46684474	46684676	202	46684576	27	24.1429	7	0	1	2	SLC13A3, TP53RK	-91, 5061	upstream, in gene
hESC	1176	20	47319569	47319782	213	47319648	30	24.4286	7	0	1	2	ZMYND8, LOC100131496	37241, 1146	in gene, in gene
hESC	1177	20	48828221	48828516	295	48828384	22	17.8	10	1	1	2	PREX1, LOC105372648	-501, 59789	upstream, downstream
hESC	1178	20	49713932	49714323	391	49714112	64	42	12	1	1	1	B4GALT5	-228	upstream
hESC	1179	20	50931468	50931952	484	50931616	28	23.2667	15	1	2	3	ADNP, ADNP-AS1, DPM1	-626, 632, 26945	upstream, in gene, downstream
hESC	1180	20	50992228	50992568	340	50992384	51	40.8	10	0	0	0
hESC	1181	20	52048408	52048696	288	52048512	42	33.4444	9	0	0	0
hESC	1182	20	53282293	53282495	202	53282336	21	18.5	6	0	0	1	TSHZ2	310027	in gene
hESC	1183	20	53768465	53768746	281	53768576	34	28.6667	9	0	0	0
hESC	1184	20	56596187	56596559	372	56596384	30	24.4167	12	0	0	1	LOC105372682	37473	in gene
hESC	1185	20	56736366	56736807	441	56736480	86	51.5	14	0	0	0
hESC	1186	20	56925186	56925501	315	56925323	39	33.3333	9	1	0	0
hESC	1187	20	57232137	57232378	241	57232224	29	26.4286	7	0	0	1	BMP7	34427	in gene
hESC	1188	20	58669501	58670005	504	58669760	36	28.75	16	0	0	2	STX16-NPEPL1, STX16	18507, 18507	in gene, in gene
hESC	1189	20	58753518	58753881	363	58753696	84	59.1818	11	0	0	0
hESC	1190	20	58797395	58797782	387	58797568	89	58.9167	12	0	0	0
hESC	1191	20	59268858	59269151	293	59268992	36	27.6667	9	0	0	1	ZNF831	145564	downstream
hESC	1192	20	61422668	61422953	285	61422784	35	27.4444	9	0	0	1	CDH4	170358	in gene
hESC	1193	20	61436798	61437079	281	61436864	26	23.6667	9	0	1	2	CDH4, LOC105372703	184438, 589	in gene, in gene
hESC	1194	20	62366426	62366634	208	62366480	28	23.2857	7	1	1	3	LAMA5, LAMA5-AS1, LOC105372708	840, 13470, 12498	in gene, downstream, downstream
hESC	1195	20	62928647	62928911	264	62928768	24	21.375	8	1	0	2	DIDO1, GID8	9184, -9321	in gene, upstream
hESC	1196	20	63334948	63335457	509	63335168	32	24.8125	16	0	0	2	COL20A1, CHRNA4	41999, 26228	downstream, downstream
hESC	1197	20	64062906	64063160	254	64062976	20	17.375	8	1	0	1	TCEA2	20626	in gene
hESC	1198	21	15423766	15424042	276	15423920	27	22.3333	9	0	0	1	LOC101927745	20754	in gene
hESC	1199	21	16241596	16242013	417	16241792	122	78.3077	13	0	0	2	LOC105369159, MIR99AHG	200500, 171270	in gene, in gene
hESC	1200	21	17989855	17990127	272	17989984	35	26.7778	9	0	0	1	CHODL	170389	in gene
hESC	1201	21	19553924	19554471	547	19554144	37	27.1176	17	0	0	0
hESC	1202	21	20617182	20617453	271	20617328	29	23	9	0	0	0
hESC	1203	21	22374590	22374803	213	22374704	22	19.1429	7	0	0	0
hESC	1204	21	28325660	28325862	202	28325760	24	20.2857	7	0	0	0
hESC	1205	21	28922449	28922651	202	28922544	16	14.3333	6	0	1	2	LOC105372765, LTN1	1124, 70412	in gene, downstream
hESC	1206	21	33542657	33542976	319	33542768	36	29.9	10	1	2	3	GART, SON, MIR6501	149, -270, -7894	in gene, upstream, upstream
hESC	1207	21	34668905	34669216	311	34669024	30	23.3	10	1	1	1	CLIC6	-268	upstream
hESC	1208	21	35603589	35603814	225	35603744	17	14.2857	7	0	0	0
hESC	1209	21	36097102	36097325	223	36097216	23	20.2857	7	0	1	2	LOC100133286, LOC105369306	29424, -7218	in gene, upstream
hESC	1210	21	36990322	36990541	219	36990496	40	33.5714	7	1	1	1	HLCS	-250	upstream
hESC	1211	21	38472811	38473058	247	38472896	24	20.125	8	0	0	1	ERG	188937	in gene
hESC	1212	21	38945606	38945831	225	38945728	33	25.5714	7	0	1	1	LOC400867	-7299	upstream
hESC	1213	21	38979340	38979542	202	38979408	27	24.5	6	0	1	2	LOC101928435, LOC102724740	-1634, 39848	upstream, downstream
hESC	1214	21	39313629	39313911	282	39313760	33	26	9	1	3	3	BRWD1, BRWD1-IT2, BRWD1-AS1	59, -147, -1947	in gene, upstream, upstream
hESC	1215	21	39612594	39612836	242	39612736	30	25.5	8	1	2	2	B3GALT5-AS1, B3GALT5	86, -204	in gene, upstream
hESC	1216	21	40335731	40336045	314	40335840	45	34.2	10	0	0	1	DSCAM	511273	in gene
hESC	1217	21	42937618	42937838	220	42937696	25	22	7	0	0	1	LOC105372819	18369	downstream
hESC	1218	21	44517281	44517591	310	44517440	35	30	9	0	1	3	TSPEAR, TSPEAR-AS1, TSPEAR-AS2	194140, 11396, 225	in gene, downstream, in gene
hESC	1219	21	45406671	45407052	381	45406848	70	49.3333	12	0	2	3	LOC101928745, COL18A1, COL18A1-AS2	-1406, 1711, 3217	upstream, in gene, downstream
hESC	1220	21	46049703	46050004	301	46049824	34	26	9	0	0	0
hESC	1221	22	17235223	17235477	254	17235328	29	25.375	8	0	0	0
hESC	1222	22	17638506	17638755	249	17638571	29	26.875	8	1	0	2	ATP6V1E1, BCL2L13	-9749, 9716	upstream, in gene
hESC	1223	22	18929502	18929857	355	18929632	58	41.75	12	0	0	1	PRODH	6921	in gene
hESC	1224	22	19479249	19479764	515	19479584	74	47.75	16	1	2	2	UFD1L, CDC45	-288, 199	upstream, in gene
hESC	1225	22	19705485	19705721	236	19705568	40	33.8571	7	0	0	1	SEPT5	-8896	upstream
hESC	1226	22	19891677	19891879	202	19891744	26	22.2857	7	0	0	1	TXNRD2	50248	in gene
hESC	1227	22	21567676	21567878	202	21567712	22	18	7	1	0	1	UBE2L3	18265	in gene
hESC	1228	22	22168504	22168938	434	22168672	101	61.7143	14	0	0	2	IGL, IGLV4-60	142596, 6474	in gene, downstream
hESC	1229	22	22410029	22410231	202	22410064	16	14	6	0	2	3	IGL, LOC101929255, IGLV1-40	383988, -882, 247	in gene, upstream, in gene
hESC	1230	22	23230375	23230797	422	23230528	62	39.0769	13	0	0	1	BCR	50163	in gene
hESC	1231	22	23242429	23242685	256	23242560	36	30.75	8	0	0	1	BCR	62195	in gene
hESC	1232	22	23717247	23717493	246	23717376	41	34.375	8	1	0	0
hESC	1233	22	29267763	29268226	463	29267936	41	29.5333	15	1	2	4	EMID1, RHBDD3, LOC105372986, EWSR1	62024, 249, 7071, -73	downstream, in gene, downstream, upstream
hESC	1234	22	29306291	29306505	214	29306368	37	31.8571	7	1	1	3	EWSR1, GAS2L1, RASL10A	38359, -250, 13250	downstream, upstream, downstream
hESC	1235	22	30424042	30424399	357	30424224	42	32.8182	11	1	2	4	SEC14L2, LOC105372989, MTFP1, LOC105372990	27283, -772, -1399, -7757	in gene, upstream, upstream, upstream
hESC	1236	22	30425595	30425901	306	30425696	32	26.2	10	1	3	4	SEC14L2, LOC105372989, MTFP1, LOC105372990	28755, -2244, 73, -6285	downstream, upstream, in gene, upstream
hESC	1237	22	30606789	30607122	333	30606944	53	39.9	10	0	2	2	PES1, TCN2	69, -139	in gene, upstream
hESC	1238	22	30655575	30655822	247	30655680	30	23.75	8	0	0	2	SLC35E4, DUSP18	19874, 12210	downstream, in gene
hESC	1239	22	35299754	35300062	308	35299904	53	40	9	1	1	2	HMGXB4, TOM1	58369, 629	downstream, in gene
hESC	1240	22	36459562	36459906	344	36459824	21	18.4545	11	0	0	2	LOC105373018, TXN2	2980, 22201	downstream, downstream
hESC	1241	22	38181884	38182120	236	38181952	26	22.25	8	1	0	1	PLA2G6	10157	in gene
hESC	1242	22	38325580	38325890	310	38325728	21	19	10	0	1	2	LOC400927-CSNK1E, CSNK1E	72794, -7644	in gene, upstream
hESC	1243	22	38506299	38506932	633	38506464	84	46.85	20	1	1	2	DDX17, DMC1	-124, 63822	upstream, downstream
hESC	1244	22	38681799	38682034	235	38681856	26	23.7143	7	1	1	3	CBY1, TOMM22, JOSD1	25203, -93, 19562	downstream, upstream, downstream
hESC	1245	22	39319517	39319742	225	39319600	36	31.2857	7	1	5	5	RPL3, SNORD83B, SNORD83A, RNU86, SNORD43	65, -5689, -4293, -2704, -487	in gene, upstream, upstream, upstream, upstream
hESC	1246	22	39510789	39511013	224	39510864	30	25.4286	7	0	0	3	MIEF1, LOC105373035, ATF4	10764, -8714, -9695	in gene, upstream, upstream
hESC	1247	22	40951391	40951611	220	40951520	35	28.5714	7	1	1	1	RBX1	173	in gene
hESC	1248	22	41468951	41469243	292	41469024	24	21.7778	9	1	3	3	PHF5A, ACO2, LOC105369160	-320, -101, -164	upstream, upstream, upstream
hESC	1249	22	41481965	41482168	203	41482048	28	25.1667	6	0	0	2	ACO2, LOC105369160	12923, 12860	in gene, in gene
hESC	1250	22	41946494	41947065	571	41946656	31	22.9444	18	1	2	2	CENPM, LINC00634	508, -5531	in gene, upstream
hESC	1251	22	42275977	42276225	248	42276128	37	29	8	0	0	2	TCF20, OGFRP1	7794, 6375	in gene, downstream
hESC	1252	22	42493486	42493712	226	42493600	29	25	7	0	0	1	LOC101927372	12259	downstream
hESC	1253	22	44147798	44148194	396	44147968	46	34	13	0	1	2	PARVB, TRU-TCA2-1	148757, -2689	in gene, upstream
hESC	1254	22	46561403	46561823	420	46561632	67	44.4615	13	0	0	1	LOC105373075	12884	downstream
hESC	1255	3	10453	10715	262	10496	27	22.375	8	0	1	1	LOC102723448	-1255	upstream
hESC	1256	3	4466902	4467421	519	4467200	133	73.5625	16	1	1	1	SUMF1	82	in gene
hESC	1257	3	5213707	5213938	231	5213760	23	20.5714	7	0	0	1	EDEM1	26086	in gene
hESC	1258	3	9946541	9946743	202	9946624	24	21.1667	6	1	1	3	CRELD1, PRRT3, PRRT3-AS1	12836, 5770, -780	downstream, in gene, upstream
hESC	1259	3	10141794	10142025	231	10141824	21	18	7	1	1	1	VHL	189	in gene
hESC	1260	3	10395276	10395483	207	10395328	31	26.8333	6	0	1	2	ATP2B2, MIR885	312665, -766	in gene, upstream
hESC	1261	3	12159291	12159504	213	12159328	38	32.7143	7	0	1	2	SYN2, TIMP4	154968, 23	in gene, in gene
hESC	1262	3	13347193	13347694	501	13347312	30	25.4375	16	0	0	1	NUP210	73007	in gene
hESC	1263	3	14216184	14216926	742	14216416	197	86.4783	23	0	0	1	LOC105376958	-8263	upstream
hESC	1264	3	14534861	14535092	231	14534960	30	27.5714	7	0	0	1	GRIP2	68036	in gene
hESC	1265	3	14651339	14651837	498	14651616	221	138.533	15	1	1	2	CCDC174, LOC105376962	-130, 14185	upstream, downstream
hESC	1266	3	20152339	20152560	221	20152432	20	16.5714	7	0	0	2	KAT2B, SGOL1	112400, 35699	in gene, downstream
hESC	1267	3	21543447	21543751	304	21543616	15	13.7	10	0	1	2	ZNF385D, ZNF385D-AS1	829025, 827	in gene, in gene
hESC	1268	3	23946202	23946457	255	23946304	20	17.75	8	1	1	1	NR1D2	1044	in gene
hESC	1269	3	24477179	24477564	385	24477344	29	21.75	12	0	0	2	THRB, LOC105376994	17937, 31153	in gene, downstream
hESC	1270	3	24952464	24952690	226	24952544	25	21.4286	7	0	0	1	LOC101927874	123200	in gene
hESC	1271	3	27728466	27728853	387	27728624	39	31.5833	12	0	1	1	EOMES	-5909	upstream
hESC	1272	3	30549706	30549962	256	30549792	43	33.75	8	0	0	0
hESC	1273	3	32780479	32781014	535	32780800	44	31.7059	17	1	0	1	CNOT10	95655	downstream
hESC	1274	3	32844122	32844348	226	32844256	36	30.8571	7	0	0	1	TRIM71	26238	in gene
hESC	1275	3	33426108	33426433	325	33426240	64	42.7273	11	0	0	1	UBP1	14573	in gene
hESC	1276	3	36993462	36993840	378	36993632	83	59.5	12	1	3	3	TRANK1, EPM2AIP1, MLH1	-2651, -328, 282	upstream, upstream, in gene
hESC	1277	3	38165238	38165464	226	38165344	34	30.8571	7	1	2	2	LOC101928234, OXSR1	134, 84	in gene, in gene
hESC	1278	3	41202718	41202962	244	41202800	21	18.125	8	0	0	1	CTNNB1	3349	in gene
hESC	1279	3	41363092	41363362	270	41363264	38	29.6667	9	0	0	1	ULK4	599623	in gene
hESC	1280	3	44761638	44761890	252	44761760	45	37	8	1	2	2	KIAA1143, KIF15	-63, 46	upstream, in gene
hESC	1281	3	45684561	45684827	266	45684640	30	24.875	8	0	1	4	LIMD1, LIMD1-AS1, TRR-ACG2-1, SACM1L	90452, 4242, 4431, -4622	downstream, in gene, downstream, upstream
hESC	1282	3	48663947	48664154	207	48664064	32	29	6	1	2	3	CELSR3, CELSR3-AS1, NCKIPSD	-1149, 296, 21869	upstream, in gene, downstream
hESC	1283	3	49021420	49021657	237	49021600	28	24.7143	7	1	4	7	WDR6, DALRD3, MIR425, NDUFAF3, MIR191, IMPDH2, QRICH1	14396, -214, -1366, 1125, -891, 8101, 72471	downstream, upstream, upstream, in gene, upstream, downstream, downstream
hESC	1284	3	49094026	49094325	299	49094176	39	33.1111	9	1	1	3	QRICH1, QARS, MIR6890	-105, 10953, 5738	upstream, downstream, downstream
hESC	1285	3	50890970	50891290	320	50891152	37	29.8	10	0	0	1	DOCK3	216183	in gene
hESC	1286	3	54629551	54629884	333	54629696	21	18	10	0	0	2	CACNA2D3, ESRG	507103, 10161	in gene, downstream
hESC	1287	3	54630892	54631175	283	54631072	20	17.8889	9	0	0	2	CACNA2D3, ESRG	508479, 8785	in gene, downstream
hESC	1288	3	54631365	54631800	435	54631648	25	22.6154	13	0	0	2	CACNA2D3, ESRG	509055, 8209	in gene, downstream
hESC	1289	3	56123604	56123838	234	56123664	34	28.4286	7	0	0	1	ERC2	344702	in gene
hESC	1290	3	56683348	56683608	260	56683520	27	23.5	8	1	1	1	FAM208A	-278	upstream
hESC	1291	3	57130864	57131129	265	57130960	40	34.25	8	0	0	1	IL17RD	39357	in gene
hESC	1292	3	57755731	57756371	640	57756096	251	136.1	20	1	1	1	SLMAP	-125	upstream
hESC	1293	3	58306051	58306763	712	58306336	330	160.591	22	1	1	1	RPP14	91	in gene
hESC	1294	3	58332648	58332934	286	58332768	40	29.6667	9	1	1	1	PXK	-122	upstream
hESC	1295	3	58491799	58492134	335	58491936	66	46	11	1	1	1	KCTD6	-160	upstream
hESC	1296	3	59128754	59128999	245	59128832	43	35.375	8	0	0	1	LOC105377110	78656	in gene
hESC	1297	3	60669738	60670001	263	60669808	31	25.25	8	0	0	1	FHIT	581651	in gene
hESC	1298	3	61688331	61688793	462	61688576	80	54.8571	14	0	0	1	PTPRG	127007	in gene
hESC	1299	3	62415479	62415765	286	62415648	26	22.1111	9	0	0	1	CADPS	459741	in gene
hESC	1300	3	62678871	62679215	344	62679008	50	35.2727	11	0	0	1	CADPS	196381	in gene
hESC	1301	3	66532126	66532401	275	66532256	38	32	9	0	0	0
hESC	1302	3	66798076	66798538	462	66798272	72	47.9333	15	0	0	1	LOC105377144	174121	in gene
hESC	1303	3	66988849	66989098	249	66988944	36	29.75	8	0	0	1	KBTBD8	-9359	upstream
hESC	1304	3	68632236	68632497	261	68632336	49	39.75	8	0	0	0
hESC	1305	3	70532912	70533126	214	70533072	21	17.7143	7	0	0	0
hESC	1306	3	71497635	71497858	223	71497728	28	23.8571	7	0	0	1	FOXP1	86261	in gene
hESC	1307	3	71817451	71817656	205	71817547	19	18.1667	6	0	0	0
hESC	1308	3	75254670	75255062	392	75254864	18	15.0833	12	0	0	0
hESC	1309	3	76043833	76044112	279	76043936	38	30.6667	9	0	0	1	ROBO2	137261	in gene
hESC	1310	3	77475572	77475792	220	77475648	24	20	7	0	0	1	ROBO2	1568973	in gene
hESC	1311	3	77524459	77524673	214	77524592	17	14.8571	7	0	0	1	ROBO2	1617917	in gene
hESC	1312	3	78322922	78323270	348	78323072	52	35.8182	11	0	0	0
hESC	1313	3	84066897	84067117	220	84066976	23	19.7143	7	0	0	0
hESC	1314	3	84837014	84837306	292	84837184	25	20.7778	9	0	0	1	LINC00971	32391	in gene
hESC	1315	3	85586127	85586338	211	85586208	19	16.5714	7	0	0	1	CADM2	627226	in gene
hESC	1316	3	86175608	86175888	280	86175712	49	39.4444	9	0	0	1	LOC102723364	91678	in gene
hESC	1317	3	89165690	89165956	266	89165792	38	29	9	0	0	1	EPHA3	58268	in gene
hESC	1318	3	95927150	95927352	202	95927264	25	22.3333	6	0	0	0
hESC	1319	3	99876121	99876466	345	99876192	19	15.1818	11	1	0	2	CMSS1, FILIP1L	58358, 238321	in gene, in gene
hESC	1320	3	101677153	101677399	246	101677248	54	44.8571	7	1	2	4	ZBTB11, ZBTB11-AS1, RPL24, LOC105374013	-104, 818, 9471, -9950	upstream, in gene, downstream, upstream
hESC	1321	3	102688205	102688414	209	102688288	21	17.5	6	0	0	1	LOC105374016	22484	in gene
hESC	1322	3	106830235	106830690	455	106830496	67	42.8667	15	0	0	1	LOC101929534	7890	in gene
hESC	1323	3	109187489	109187762	273	109187584	33	26.75	8	0	0	1	LINC00488	9419	downstream
hESC	1324	3	109356327	109356565	238	109356448	37	30.5714	7	0	0	0
hESC	1325	3	112561791	112562129	338	112561952	60	41.3636	11	1	2	2	ATG3, SLC35A5	11, 243	in gene, in gene
hESC	1326	3	114152615	114152845	230	114152672	27	24.4286	7	1	0	1	DRD3	46735	in gene
hESC	1327	3	114154565	114154894	329	114154720	23	19.5	10	0	0	1	DRD3	44687	in gene
hESC	1328	3	117398603	117398842	239	117398720	31	27.1429	7	0	0	0
hESC	1329	3	117399787	117400061	274	117399904	41	33.25	8	0	0	0
hESC	1330	3	119463618	119463922	304	119463744	35	29	9	0	2	2	TMEM39A, POGLUT1	-62, -5194	upstream, upstream
hESC	1331	3	119468799	119469077	278	119468928	48	36.4444	9	1	2	2	TMEM39A, POGLUT1	-5246, -10	upstream, upstream
hESC	1332	3	119579685	119580235	550	119579936	88	52	17	1	1	1	ADPRH	503	in gene
hESC	1333	3	120677247	120677451	204	120677328	22	19.1429	7	0	0	2	HGD, RABL3	5243, 65209	in gene, downstream
hESC	1334	3	122793739	122793978	239	122793824	39	33.1429	7	1	2	2	HSPBAP1, DIRC2	1392, -1230	in gene, upstream
hESC	1335	3	123144056	123144279	223	123144139	25	23.2857	7	0	0	1	PDIA5	77130	in gene
hESC	1336	3	123314964	123315313	349	123315120	44	34.2727	11	0	0	1	ADCY5	133518	in gene
hESC	1337	3	123585024	123585738	714	123585280	209	119.13	23	1	2	2	HACD2, MYLK-AS1	-203, -233	upstream, upstream
hESC	1338	3	127590544	127590806	262	127590640	38	31.125	8	1	1	3	TPRA1, MIR7976, MCM2	4419, -3464, -7717	in gene, upstream, upstream
hESC	1339	3	127732419	127732680	261	127732512	22	18.375	8	0	0	1	MGLL	90738	in gene
hESC	1340	3	128280823	128281157	334	128280960	47	35.2727	11	0	0	1	EEFSEC	127503	in gene
hESC	1341	3	128680922	128681174	252	128681056	48	39.375	8	1	0	0
hESC	1342	3	128725803	128726217	414	128726016	136	87.3077	13	1	1	1	RAB7A	-120	upstream
hESC	1343	3	128879412	128879614	202	128879488	43	38.3333	6	1	1	2	LOC653712, ACAD9	-7947, -2	upstream, upstream
hESC	1344	3	129027045	129027337	292	129027200	35	26.4444	9	1	1	2	KIAA1257, EFCC1	-681, 25949	upstream, in gene
hESC	1345	3	132382354	132382556	202	132382464	25	21.8333	6	0	0	0
hESC	1346	3	132417315	132417580	265	132417472	29	23.75	8	1	1	1	DNAJC13	-60	upstream
hESC	1347	3	138409026	138409358	332	138409184	42	32.4	10	0	1	2	MRAS, LOC105374129	61536, -1121	downstream, upstream
hESC	1348	3	139539547	139539777	230	139539648	30	24.75	8	1	1	2	LOC100507291, RBP1	149845, 181	in gene, in gene
hESC	1349	3	139675392	139675594	202	139675520	20	17.8571	7	0	1	1	NMNAT3	2523	in gene
hESC	1350	3	139937668	139937941	273	139937808	36	29.875	8	0	1	1	CLSTN2	2623	in gene
hESC	1351	3	140341872	140342128	256	140341984	38	31.375	8	0	0	1	CLSTN2	406799	in gene
hESC	1352	3	141070955	141071313	358	141071136	121	82	11	0	0	1	SPSB4	20341	in gene
hESC	1353	3	141311758	141312014	256	141311872	52	40.125	8	1	0	0
hESC	1354	3	142863145	142863377	232	142863216	20	17.8571	7	0	0	1	PCOLCE2	25987	in gene
hESC	1355	3	149197727	149198018	291	149197824	42	31.7	10	0	0	1	CP	24226	in gene
hESC	1356	3	152305279	152305512	233	152305408	23	19.875	8	0	0	1	MBNL1	61087	in gene
hESC	1357	3	155363200	155363695	495	155363552	54	34	16	0	0	0
hESC	1358	3	157065209	157065530	321	157065344	46	35	10	0	0	0
hESC	1359	3	158801821	158802272	451	158801984	111	67.0667	15	1	1	1	MFSD1	534	in gene
hESC	1360	3	160226757	160226972	215	160226880	14	12.6667	6	1	0	1	C3orf80	3096	in gene
hESC	1361	3	167602162	167602364	202	167602176	19	15.3333	6	0	0	1	WDR49	51325	in gene
hESC	1362	3	169002740	169003025	285	169002864	40	31.3333	9	0	1	1	LOC105374201	-150	upstream
hESC	1363	3	172854364	172854572	208	172854368	23	19.7143	7	0	0	0
hESC	1364	3	176506079	176506285	206	176506176	27	21	7	0	0	1	MIR7977	-8927	upstream
hESC	1365	3	177359952	177360155	203	177360048	20	18.1667	6	0	0	0
hESC	1366	3	179604550	179604909	359	179604736	49	37.1818	11	1	2	2	MRPL47, NDUFB5	-90, -51	upstream, upstream
hESC	1367	3	181708033	181708249	216	181708112	20	19	6	0	1	2	SOX2-OT, SOX2	651432, -3812	in gene, upstream
hESC	1368	3	181756729	181757088	359	181756832	36	28.3333	12	0	0	0
hESC	1369	3	184314342	184314550	208	184314368	15	13.6667	6	1	1	2	PSMD2, EIF4G1	15270, -127	downstream, upstream
hESC	1370	3	185938189	185938433	244	185938272	28	22.375	8	1	1	1	TRA2B	-136	upstream
hESC	1371	3	186097912	186098156	244	186098080	31	26.5	8	0	1	2	ETV5, LOC105374256	11032, -406	in gene, upstream
hESC	1372	3	186194075	186194322	247	186194160	21	18	8	1	0	1	DGKG	168074	in gene
hESC	1373	3	186998973	186999221	248	186999104	45	39.625	8	0	1	2	ST6GAL1, LOC101929079	68761, -6929	in gene, upstream
hESC	1374	3	187618652	187619015	363	187618816	78	49.6667	12	0	0	0
hESC	1375	3	190362366	190362663	297	190362464	31	23.9	10	0	0	0
hESC	1376	3	191963300	191963532	232	191963408	38	32.2857	7	0	0	0
hESC	1377	3	193812843	193813109	266	193812992	27	24.625	8	0	0	0
hESC	1378	3	194750458	194750708	250	194750576	35	28.375	8	0	0	1	LOC100507391	42155	in gene
hESC	1379	3	195699009	195699582	573	195699232	126	82.4706	17	0	1	2	LINC00969, MIR570	10734, -169	in gene, upstream
hESC	1380	3	195915110	195915327	217	195915168	48	41.6667	6	0	1	1	TNK2	-6159	upstream
hESC	1381	3	196533231	196533655	424	196533472	36	25.8462	13	0	0	0
hESC	1382	3	197456706	197456935	229	197456800	24	20	7	1	1	1	LOC105374308	1606	in gene
hESC	1383	3	197540988	197541263	275	197541104	24	19.5556	9	0	0	1	BDH1	32219	in gene
hESC	1384	3	197541732	197541976	244	197541856	32	29.1429	7	0	0	1	BDH1	31467	in gene
hESC	1385	3	197574476	197574693	217	197574560	42	34.8571	7	0	1	2	BDH1, LOC102723589	-1237, 4683	upstream, downstream
hESC	1386	3	197855036	197855322	286	197855168	60	45.5556	9	0	1	2	LRCH3, LOC105374310	63942, -2615	in gene, upstream
hESC	1387	4	2008815	2009627	812	2009120	93	45.6	25	1	0	1	NELFA	32794	in gene
hESC	1388	4	2963312	2963562	250	2963392	30	25.25	8	1	2	2	NOP14, GRK4	114, -113	in gene, upstream
hESC	1389	4	5912818	5913050	232	5912960	21	17.5714	7	0	0	0
hESC	1390	4	9691350	9691941	591	9691552	141	69.1053	19	1	0	0
hESC	1391	4	9979185	9979441	256	9979312	26	22	8	0	0	2	SLC2A9, LOC105374476	60936, -8670	in gene, upstream
hESC	1392	4	10496233	10496492	259	10496384	44	35.75	8	0	0	2	LOC105374482, CLNK	41343, 238469	in gene, in gene
hESC	1393	4	14226804	14227039	235	14226880	29	22.5714	7	0	0	0
hESC	1394	4	16775813	16776109	296	16775952	34	26.7778	9	0	0	1	LDB2	122857	in gene
hESC	1395	4	17614359	17614763	404	17614528	73	51.2308	13	1	2	3	LAP3, LOC105374508, MED28	37224, 104, -100	downstream, in gene, upstream
hESC	1396	4	18691373	18691774	401	18691552	67	47.9167	12	0	0	1	LOC105374510	170384	in gene
hESC	1397	4	18961991	18962193	202	18962032	21	18.8333	6	0	0	0
hESC	1398	4	21307684	21307926	242	21307808	16	14.1429	7	0	0	1	KCNIP4	640993	in gene
hESC	1399	4	21543574	21543796	222	21543648	22	16.8571	7	0	0	1	KCNIP4	405153	in gene
hESC	1400	4	23979626	23979861	235	23979712	31	27.2857	7	0	0	1	PPARGC1A	493059	in gene
hESC	1401	4	25312497	25312715	218	25312560	28	25.7143	7	1	1	1	ZCCHC4	-214	upstream
hESC	1402	4	26819082	26819317	235	26819200	20	17.1429	7	0	0	0
hESC	1403	4	27090468	27090684	216	27090528	24	20.3333	6	0	0	0
hESC	1404	4	28682917	28683160	243	28683040	32	26.8571	7	0	0	0
hESC	1405	4	38087387	38087593	206	38087392	19	17.2857	7	0	0	1	TBC1D1	196308	in gene
hESC	1406	4	38512912	38513169	257	38513024	19	15.875	8	0	0	1	LINC01258	10156	in gene
hESC	1407	4	41256704	41257113	409	41256896	31	23.6923	13	1	2	2	UCHL1-AS1, UCHL1	-169, 15	upstream, in gene
hESC	1408	4	41921527	41921729	202	41921568	17	14.4286	7	0	0	1	LOC105374426	13513	in gene
hESC	1409	4	44863875	44864216	341	44864032	72	55.1	10	0	0	0
hESC	1410	4	54001639	54002047	408	54001824	90	61.1667	12	0	0	1	CHIC2	63603	downstream
hESC	1411	4	54986252	54986462	210	54986336	29	25.6667	6	0	0	0
hESC	1412	4	55132834	55133072	238	55132912	23	20.2857	7	0	1	1	KDR	-7317	upstream
hESC	1413	4	58600321	58600532	211	58600400	24	22	6	0	0	0
hESC	1414	4	61758084	61758299	215	61758176	18	16	6	0	0	1	ADGRL3	375052	in gene
hESC	1415	4	63371161	63371381	220	63371232	21	17.2857	7	0	0	0
hESC	1416	4	63901408	63901651	243	63901504	29	24.125	8	0	0	0
hESC	1417	4	71765940	71766187	247	71766080	23	19.75	8	0	1	2	GC, RNA5SP163	39440, -6464	in gene, upstream
hESC	1418	4	73451454	73451730	276	73451584	43	33.2222	9	0	0	1	AFP	28480	in gene
hESC	1419	4	73985272	73985574	302	73985376	36	27.9	10	0	1	2	PF4, PPBP	-3252, 2814	upstream, downstream
hESC	1420	4	75705333	75705535	202	75705408	34	28.8333	6	0	0	1	G3BP2	19117	in gene
hESC	1421	4	76147730	76147969	239	76147808	27	21.125	8	1	1	1	NUP54	707	in gene
hESC	1422	4	78092889	78093154	265	78092992	37	27.7778	9	0	0	1	FRAS1	36024	in gene
hESC	1423	4	78369777	78369992	215	78369920	24	20.2857	7	0	0	1	FRAS1	312952	in gene
hESC	1424	4	84566081	84566350	269	84566208	20	16.75	8	0	0	1	LOC102723338	16947	in gene
hESC	1425	4	84647333	84647577	244	84647424	39	34.8571	7	0	0	1	CDS1	64520	in gene
hESC	1426	4	86482993	86483269	276	86483072	37	29.5556	9	0	0	1	MAPK10	111038	in gene
hESC	1427	4	86959835	86960102	267	86959936	35	28.7778	9	0	0	1	AFF1	25425	in gene
hESC	1428	4	87679877	87680222	345	87680032	71	50.7	10	0	1	1	LOC105377323	-7010	upstream
hESC	1429	4	87932859	87934025	1166	87933824	39	25.4865	37	0	0	0
hESC	1430	4	91577920	91578189	269	91578048	29	22.4444	9	0	0	1	CCSER1	1450654	in gene
hESC	1431	4	92255100	92255302	202	92255248	27	24.4286	7	0	0	1	LOC101929194	22054	downstream
hESC	1432	4	92255395	92255837	442	92255472	29	25	13	0	0	1	LOC101929194	21830	downstream
hESC	1433	4	92256014	92257394	1380	92256480	80	54.907	43	0	0	1	LOC101929194	20822	downstream
hESC	1434	4	92433381	92433684	303	92433536	24	19.3333	9	0	0	1	GRID2	129137	in gene
hESC	1435	4	96343151	96343371	220	96343264	29	24.1429	7	0	0	1	LOC105377338	172808	in gene
hESC	1436	4	98662827	98663049	222	98662944	35	29.4286	7	0	1	3	TSPAN5, LOC105377342, LOC105377341	-4283, 4208, 4032	upstream, in gene, in gene
hESC	1437	4	101032002	101032208	206	101032048	24	21.5	6	0	0	1	PPP3CA	315423	in gene
hESC	1438	4	101282507	101282731	224	101282656	32	26.7143	7	0	0	1	PPP3CA	64815	in gene
hESC	1439	4	103076421	103076748	327	103076640	21	18.3	10	1	1	2	SLC9B2, BDH2	731, 23227	in gene, downstream
hESC	1440	4	110411730	110412042	312	110411888	77	56.8	10	0	0	0
hESC	1441	4	112645346	112645549	203	112645440	25	21.6667	6	0	1	7	ZGRF1, LARP7, MIR367, MIR302D, MIR302A, MIR302C, MIR302B	-8445, 8476, 2501, 2631, 2811, 2990, 3117	upstream, in gene, downstream, downstream, downstream, downstream, downstream
hESC	1442	4	112645845	112646256	411	112645952	27	23.4615	13	0	5	7	ZGRF1, LARP7, MIR367, MIR302D, MIR302A, MIR302C, MIR302B	-8957, 8988, 1989, 2119, 2299, 2478, 2605	upstream, in gene, downstream, downstream, downstream, downstream, downstream
hESC	1443	4	112652343	112652579	236	112652448	32	26.25	8	0	5	6	LARP7, MIR367, MIR302D, MIR302A, MIR302C, MIR302B	15484, -4507, -4377, -4197, -4018, -3891	in gene, upstream, upstream, upstream, upstream, upstream
hESC	1444	4	112759408	112759657	249	112759520	35	28.5	8	0	0	0
hESC	1445	4	112861035	112861266	231	112861136	25	22.1429	7	0	0	1	ANK2	43053	in gene
hESC	1446	4	113762619	113762851	232	113762752	31	24.5	8	0	1	1	CAMK2D	-619	upstream
hESC	1447	4	120003939	120004607	668	120004496	20	17.1	20	0	0	0
hESC	1448	4	121749309	121749511	202	121749392	31	26.7143	7	0	0	1	TMEM155	16650	downstream
hESC	1449	4	122100589	122100801	212	122100672	29	23.8571	7	0	0	0
hESC	1450	4	122828319	122828632	313	122828448	38	29.2	10	0	1	1	FGF2	1740	in gene
hESC	1451	4	123304319	123304521	202	123304352	43	34.8571	7	0	0	1	SPATA5	381282	in gene
hESC	1452	4	124636852	124637105	253	124636960	48	38.5	8	0	0	0
hESC	1453	4	128682958	128683336	378	128683168	25	19.8333	12	0	0	0
hESC	1454	4	130026203	130026560	357	130026368	110	70.25	12	0	0	1	LOC105377418	3290	in gene
hESC	1455	4	136203248	136203455	207	136203344	34	30	6	0	0	0
hESC	1456	4	136504992	136505274	282	136505120	35	28.3333	9	0	0	0
hESC	1457	4	136803437	136803685	248	136803552	28	21.125	8	0	0	1	LOC105377441	163766	in gene
hESC	1458	4	138647533	138647755	222	138647680	25	21.1429	7	0	0	0
hESC	1459	4	138658554	138658879	325	138658720	47	35.4	10	0	0	0
hESC	1460	4	138659936	138660216	280	138660064	39	30.7778	9	0	0	0
hESC	1461	4	148882334	148882536	202	148882400	22	19.8571	7	0	0	0
hESC	1462	4	151760901	151761136	235	151760960	44	33.8571	7	1	1	1	GATB	63	in gene
hESC	1463	4	153790259	153790472	213	153790304	26	22	7	0	1	1	SFRP2	-1228	upstream
hESC	1464	4	155427008	155427316	308	155427120	38	29.4	10	0	1	1	LOC105377503	-1394	upstream
hESC	1465	4	166737493	166737721	228	166737600	18	14.7143	7	0	0	1	SPOCK3	497196	in gene
hESC	1466	4	173074435	173074768	333	173074592	45	33.3	10	0	1	1	LOC102723440	-1542	upstream
hESC	1467	4	181950007	181950338	331	181950144	57	38.7273	11	0	0	0
hESC	1468	4	182560504	182560743	239	182560608	49	41.5	8	0	0	1	TENM3	236624	in gene
hESC	1469	4	184167712	184167921	209	184167808	26	23.7143	7	0	0	1	ENPP6	50153	in gene
hESC	1470	4	185143119	185143380	261	185143248	23	19.5	8	1	1	2	SLC25A4, CFAP97	-15, 66247	upstream, downstream
hESC	1471	4	186688131	186688590	459	186688384	75	47.5714	14	0	0	1	FAT1	38531	in gene
hESC	1472	4	187019976	187020225	249	187020064	22	17.875	8	0	0	1	LOC102723906	179401	in gene
hESC	1473	5	3101139	3101483	344	3101280	42	32.5455	11	0	0	0
hESC	1474	5	5078576	5078829	253	5078720	22	17.75	8	0	1	2	LINC01020, LOC105374631	44361, -310	downstream, upstream
hESC	1475	5	5179658	5179964	306	5179808	54	42.7778	9	0	0	1	ADAMTS16	39478	in gene
hESC	1476	5	7269967	7271298	1331	7271136	33	23.9048	42	0	1	1	LOC105374643	-1673	upstream
hESC	1477	5	7272672	7273001	329	7272816	27	23.1818	11	0	1	1	LOC105374643	7	in gene
hESC	1478	5	10103109	10103419	310	10103264	59	44	9	0	0	0
hESC	1479	5	11386022	11386314	292	11386144	51	38.1111	9	0	0	1	CTNND2	517899	in gene
hESC	1480	5	12623494	12623845	351	12623616	45	34	11	0	0	1	LINC01194	48759	in gene
hESC	1481	5	14728424	14728659	235	14728544	29	25.5714	7	0	0	1	ANKH	143234	in gene
hESC	1482	5	15026938	15027334	396	15027168	40	25.4615	13	0	0	0
hESC	1483	5	17401713	17401963	250	17401808	33	28	8	0	1	1	LOC101929544	-2288	upstream
hESC	1484	5	19880851	19881104	253	19880960	37	29.5	8	0	0	1	CDH18	694913	in gene
hESC	1485	5	19927903	19928254	351	19928064	37	28.4545	11	0	0	1	CDH18	647809	in gene
hESC	1486	5	23169569	23169817	248	23169728	17	15.1429	7	0	1	1	LOC105374687	1867	in gene
hESC	1487	5	24208712	24209093	381	24208752	23	19.75	12	0	0	1	C5orf17	256979	downstream
hESC	1488	5	25345478	25345703	225	25345536	26	22.7143	7	0	0	1	LOC105374693	154940	in gene
hESC	1489	5	25417914	25418129	215	25417984	16	14.4286	7	0	0	1	LOC105374693	227388	in gene
hESC	1490	5	25424502	25424856	354	25424704	23	19	11	0	0	1	LOC105374693	234108	in gene
hESC	1491	5	31753752	31754043	291	31753888	46	36.7778	9	0	0	1	PDZD2	114525	in gene
hESC	1492	5	34411477	34411789	312	34411632	36	28.1	10	0	0	1	LOC105374720	81738	in gene
hESC	1493	5	36151834	36152093	259	36151936	58	48.25	8	1	3	3	LMBRD2, MIR580, SKP2	-23, -3948, -53	upstream, upstream, upstream
hESC	1494	5	41904168	41904546	378	41904352	75	53.75	12	1	1	1	C5orf51	63	in gene
hESC	1495	5	45205471	45205852	381	45205664	70	48.6667	12	0	0	0
hESC	1496	5	51172871	51173110	239	51173024	23	20.4286	7	0	0	0
hESC	1497	5	52078499	52078790	291	52078656	23	19.7778	9	0	0	0
hESC	1498	5	53560540	53560742	202	53560704	19	14.1429	7	1	1	1	NDUFS4	81	in gene
hESC	1499	5	54018489	54018697	208	54018592	27	24.2857	7	0	0	1	ARL15	291994	in gene
hESC	1500	5	55089259	55089529	270	55089408	29	24.75	8	0	0	0
hESC	1501	5	58717669	58717941	272	58717824	37	30.25	8	0	0	1	RAB3C	135697	in gene
hESC	1502	5	58925662	58925900	238	58925760	27	22.625	8	0	0	0
hESC	1503	5	59563127	59563383	256	59563200	21	17	8	0	0	1	PDE4D	958920	in gene
hESC	1504	5	59709352	59709590	238	59709472	35	29.4286	7	0	1	2	PDE4D, MIR582	812648, -5769	in gene, upstream
hESC	1505	5	59709734	59709936	202	59709824	24	21.3333	6	0	1	2	PDE4D, MIR582	812296, -6121	in gene, upstream
hESC	1506	5	59800640	59800853	213	59800752	23	20.5714	7	0	0	2	PDE4D, LOC105378988	721368, 32359	in gene, in gene
hESC	1507	5	62043542	62043911	369	62043728	44	31.9167	12	0	0	0
hESC	1508	5	62075162	62075382	220	62075200	27	23.7143	7	0	0	0
hESC	1509	5	66144604	66144885	281	66144688	43	36.1111	9	1	1	1	SREK1	470	in gene
hESC	1510	5	66904204	66904430	226	66904288	32	28.7143	7	0	0	1	MAST4	307940	in gene
hESC	1511	5	68922406	68922637	231	68922560	38	33.4286	7	0	0	0
hESC	1512	5	69415011	69415358	347	69415136	23	19.4	10	1	1	2	RAD17, MARVELD2	45839, 24	downstream, in gene
hESC	1513	5	74543764	74543981	217	74543776	19	16	7	0	1	1	LINC01331	-6800	upstream
hESC	1514	5	75055860	75056075	215	75055968	20	17.2857	7	0	1	1	LINC01336	-3325	upstream
hESC	1515	5	76499597	76499929	332	76499744	52	37.7	10	0	0	1	IQGAP2	96489	in gene
hESC	1516	5	76808137	76808579	442	76808288	43	31.2143	14	0	0	0
hESC	1517	5	78017243	78017524	281	78017376	41	31.5556	9	0	0	1	AP3B1	277379	in gene
hESC	1518	5	78690007	78690338	331	78690176	29	22.2727	11	0	0	0
hESC	1519	5	81851860	81852155	295	81852000	60	46	9	0	0	0
hESC	1520	5	83355029	83355247	218	83355136	33	28.1429	7	0	0	1	XRCC4	277727	downstream
hESC	1521	5	84480918	84481177	259	84481024	45	37.625	8	0	0	1	LOC105379057	96234	in gene
hESC	1522	5	86929075	86929392	317	86929248	60	44.2	10	0	0	0
hESC	1523	5	87787671	87787996	325	87787840	51	36.8	10	0	0	0
hESC	1524	5	88664638	88664900	262	88664736	38	31.8889	9	0	1	2	LINC00461, MIR9-2	20067, 2203	in gene, downstream
hESC	1525	5	90477103	90477305	202	90477248	22	21	6	0	1	2	MBLAC2, POLR3G	-2480, 3019	upstream, in gene
hESC	1526	5	94573463	94573665	202	94573562	13	12.7143	7	0	1	2	KIAA0825, LOC105379086	45042, -4307	in gene, upstream
hESC	1527	5	97316420	97316658	238	97316496	25	20.8571	7	0	0	0
hESC	1528	5	97400466	97400813	347	97400592	18	16	11	0	0	0
hESC	1529	5	107472838	107473052	214	107472928	27	23.5	6	0	0	1	EFNA5	197967	in gene
hESC	1530	5	107808930	107809149	219	107808992	31	27.6667	6	0	0	0
hESC	1531	5	107809648	107809889	241	107809728	30	25.5	8	0	0	0
hESC	1532	5	111091973	111092261	288	111092128	28	21.1111	9	1	1	1	WDR36	-44	upstream
hESC	1533	5	115262786	115263054	268	115262944	40	35.125	8	1	1	2	PGGT1B, CCDC112	-57, 33817	upstream, downstream
hESC	1534	5	115369888	115370104	216	115369936	21	18.4286	7	0	1	1	LOC105379130	280	in gene
hESC	1535	5	115841480	115841850	370	115841664	53	39	11	1	2	2	ATG12, AP3S1	187, -258	in gene, upstream
hESC	1536	5	119458962	119459202	240	119459072	31	26.25	8	0	0	1	HSD17B4	6629	in gene
hESC	1537	5	124506766	124506975	209	124506912	19	17.6667	6	0	0	0
hESC	1538	5	124581044	124581283	239	124581152	35	27.375	8	0	0	0
hESC	1539	5	124738948	124739204	256	124739056	30	26.25	8	0	0	1	ZNF608	9768	in gene
hESC	1540	5	124980529	124980859	330	124980704	72	52.7	10	0	0	1	LOC105379158	15399	downstream
hESC	1541	5	126490247	126490452	205	126490352	26	23.8333	6	0	1	2	GRAMD3, LOC105379161	130256, 1434	in gene, in gene
hESC	1542	5	127307944	127308219	275	127308064	32	25.125	8	0	0	1	MEGF10	79117	in gene
hESC	1543	5	132963515	132963824	309	132963648	33	27	10	1	2	2	AFF4, LOC105379177	14, -955	in gene, upstream
hESC	1544	5	134047080	134047352	272	134047200	43	32.625	8	0	0	0
hESC	1545	5	134411548	134411915	367	134411744	36	27.6667	12	1	1	2	CDKN2AIPNL, LOC105379186	2859, -262	in gene, upstream
hESC	1546	5	134737784	134738033	249	134737904	46	37.25	8	0	1	2	SEC24A, CAMLG	89119, -23	downstream, upstream
hESC	1547	5	134738328	134738578	250	134738432	51	40.75	8	1	1	1	CAMLG	505	in gene
hESC	1548	5	134874138	134874489	351	134874336	55	40.7273	11	1	2	2	TXNDC15, LOC105379187	566, 1210	in gene, downstream
hESC	1549	5	135399854	135400161	307	135400064	21	17.5	10	0	1	1	H2AFY	83	in gene
hESC	1550	5	136776568	136776791	223	136776688	23	20.2857	7	0	0	0
hESC	1551	5	138092337	138092551	214	138092448	19	16.2857	7	0	0	1	WNT8A	8556	in gene
hESC	1552	5	138095217	138095610	393	138095344	26	21.6667	12	0	0	1	WNT8A	11452	in gene
hESC	1553	5	138331815	138332094	279	138331904	44	37.375	8	1	2	3	CDC25C, LOC100128966, FAM53C	6451, -151, -5631	in gene, upstream, upstream
hESC	1554	5	139523869	139524435	566	139524272	61	34.7778	18	0	0	0
hESC	1555	5	140557343	140557806	463	140557504	55	39.1333	15	1	2	6	ANKHD1-EIF4EBP3, EIF4EBP3, SRA1, APBB3, MIR6831, SLC35A4	155690, 9838, 589, 7100, 6247, -7061	downstream, downstream, in gene, downstream, downstream, upstream
hESC	1556	5	140564504	140564781	277	140564704	50	39.4444	9	1	4	4	SRA1, APBB3, MIR6831, SLC35A4	-6611, -100, -953, 139	upstream, upstream, upstream, in gene
hESC	1557	5	141002322	141002540	218	141002400	54	46.8571	7	0	0	17	PCDHA1, PCDHA@, PCDHA2, PCDHA3, PCDHA4, PCDHA5, PCDHA6, PCDHA7, PCDHA8, PCDHA9, PCDHA10, PCDHA11, PCDHA12, PCDHA13, PCDHAC1, PCDHAC2, PCDHACT	216264, 216109, 207541, 201202, 195326, 180624, 174478, 168016, 161078, 154628, 146517, 134887, 127098, 120131, 75683, 36238, 23451	in gene, in gene, in gene, in gene, in gene, in gene, in gene, in gene, in gene, in gene, in gene, in gene, in gene, in gene, in gene, in gene, in gene
hESC	1558	5	142326164	142326446	282	142326240	29	23.4444	9	1	2	2	SPRY4, LOC101926941	-1185, 947	upstream, in gene
hESC	1559	5	142357002	142357260	258	142357088	30	24.875	8	1	0	1	LOC101926941	31795	in gene
hESC	1560	5	142551664	142551965	301	142551840	27	22.1111	9	0	0	0
hESC	1561	5	143037188	143037445	257	143037264	38	28.875	8	0	0	1	ARHGAP26	266884	in gene
hESC	1562	5	143405267	143405712	445	143405504	51	36.6429	14	1	0	1	NR3C1	30008	in gene
hESC	1563	5	144644396	144644621	225	144644480	22	17.1429	7	0	0	0
hESC	1564	5	146073401	146073623	222	146073536	31	28.7143	7	0	0	1	SH3RF2	136973	in gene
hESC	1565	5	146788965	146789253	288	146789088	55	40.4444	9	0	0	1	PPP2R2B	292432	in gene
hESC	1566	5	147452029	147452235	206	147452112	27	23.2857	7	0	0	1	DPYSL3	58148	in gene
hESC	1567	5	147567961	147568316	355	147568224	36	30.5455	11	0	0	1	JAKMIP2-AS1	8230	in gene
hESC	1568	5	147862150	147862432	282	147862240	21	16.7778	9	0	0	0
hESC	1569	5	148383749	148383994	245	148383872	42	36.8571	7	1	2	2	LOC102546294, FBXO38	-22, -63	upstream, upstream
hESC	1570	5	150130716	150130918	202	150130848	25	21.2857	7	0	0	1	PDGFRB	25036	in gene
hESC	1571	5	150904810	150905054	244	150904928	55	47.5714	7	1	1	2	IRGM, ZNF300	58405, 55	downstream, in gene
hESC	1572	5	151447509	151447711	202	151447552	37	32.3333	6	1	0	1	SLC36A1	36208	in gene
hESC	1573	5	151903269	151903586	317	151903424	62	45.7	10	0	0	1	GLRA1	21442	in gene
hESC	1574	5	154712582	154712800	218	154712688	34	29.7143	7	0	0	1	LARP1	30025	in gene
hESC	1575	5	156914086	156914477	391	156914304	71	49	12	0	0	1	TIMD4	58006	downstream
hESC	1576	5	157881590	157881862	272	157881696	27	20.6667	9	0	0	0
hESC	1577	5	159816324	159816635	311	159816448	29	23.3333	9	0	0	1	LOC101927766	54936	in gene
hESC	1578	5	166430777	166431076	299	166430880	23	20.8	10	0	0	0
hESC	1579	5	167305841	167306073	232	167305952	25	22.4286	7	0	0	1	TENM2	326874	in gene
hESC	1580	5	170612239	170612519	280	170612384	61	45.3333	9	0	0	1	KCNIP1	258897	in gene
hESC	1581	5	171308954	171309221	267	171309056	31	25.3333	9	1	1	2	RANBP17, TLX3	447174, -228	downstream, upstream
hESC	1582	5	171313586	171313891	305	171313728	24	19.8	10	0	0	1	TLX3	4444	downstream
hESC	1583	5	171623694	171623916	222	171623776	27	24.4286	7	0	0	0
hESC	1584	5	172008624	172008936	312	172008768	33	28.5	10	0	1	1	FBXW11	-1895	upstream
hESC	1585	5	173887787	173888250	463	173888032	98	70.1429	14	1	1	1	CPEB4	-296	upstream
hESC	1586	5	176943905	176944150	245	176944000	33	29.1429	7	0	0	1	UIMC1	78571	in gene
hESC	1587	5	177495522	177495740	218	177495616	40	34.8333	6	0	1	2	PDLIM7, DOK3	2003, 14906	in gene, downstream
hESC	1588	5	177497520	177497882	362	177497728	63	45.4545	11	1	1	2	PDLIM7, DOK3	-109, 12794	upstream, downstream
hESC	1589	5	178180261	178180463	202	178180352	19	17	6	0	0	0
hESC	1590	5	178555883	178556128	245	178556000	44	35.125	8	0	0	1	COL23A1	34555	in gene
hESC	1591	5	180343354	180343827	473	180343696	29	22.2667	15	0	0	2	GFPT2, LOC105377764	9640, 8657	in gene, downstream
hESC	1592	5	180831462	180831689	227	180831608	19	18.2857	7	1	2	3	LOC105377766, HEIH, LINC00847	8797, 10, 651	downstream, in gene, in gene
hESC	1593	5	181235984	181236247	263	181236112	19	16.125	8	0	0	4	TRIM41, GNB2L1, SNORD96A, SNORD95	12849, 7794, 5777, 7264	downstream, downstream, downstream, downstream
hESC	1594	5	181243927	181244153	226	181244032	45	39.4286	7	1	4	5	TRIM41, GNB2L1, SNORD96A, SNORD95, CTC-338M12.4	20769, -126, -2143, -656, -2509	downstream, upstream, upstream, upstream, upstream
hESC	1595	6	3423585	3423863	278	3423712	38	30.375	8	0	0	2	SLC22A23, LOC105374890	32875, 12993	in gene, downstream
hESC	1596	6	3722154	3722411	257	3722272	20	15.375	8	0	1	2	LOC100507336, PXDC1	-2198, 29740	upstream, downstream
hESC	1597	6	3905922	3906288	366	3906112	19	15.4545	11	0	0	0
hESC	1598	6	4503773	4504101	328	4503904	35	26.1818	11	0	0	2	LOC105374895, LOC105374894	15095, 79930	downstream, in gene
hESC	1599	6	5438946	5439198	252	5439072	41	35.2857	7	0	0	1	FARS2	178054	in gene
hESC	1600	6	5850963	5851181	218	5851104	25	21.7143	7	1	0	0
hESC	1601	6	8383583	8383830	247	8383696	36	30.125	8	0	0	0
hESC	1602	6	10417226	10417584	358	10417440	28	22.9091	11	1	1	2	TFAP2A, TFAP2A-AS1	2184, 5122	in gene, downstream
hESC	1603	6	10694538	10694989	451	10694848	31	24.5	14	1	1	3	C6orf52, LOC105374923, PAK1IP1	-51, 10636, 3983	upstream, downstream, in gene
hESC	1604	6	10722264	10723253	989	10722880	356	134.613	31	1	1	1	TMEM14C	-35	upstream
hESC	1605	6	10747056	10747938	882	10747520	360	155.214	28	1	1	2	TMEM14B, RNA5SP203	-239, 5406	upstream, downstream
hESC	1606	6	11179697	11179980	283	11179776	36	27.8889	9	0	0	1	NEDD9	202572	downstream
hESC	1607	6	11973287	11973542	255	11973424	33	28.5	8	0	0	0
hESC	1608	6	14273313	14273596	283	14273440	44	33.125	8	0	0	1	LINC01108	12014	downstream
hESC	1609	6	15038322	15038689	367	15038496	29	22.4167	12	0	0	0
hESC	1610	6	15245650	15246006	356	15245792	66	50.8182	11	1	1	2	JARID2, JARID2-AS1	-183, 2904	upstream, downstream
hESC	1611	6	15264900	15265115	215	15264960	35	30.3333	6	0	0	1	JARID2	18985	in gene
hESC	1612	6	15268522	15268877	355	15268672	38	29.7273	11	0	0	1	JARID2	22697	in gene
hESC	1613	6	19312442	19312684	242	19312528	20	18	8	0	0	1	LOC105374961	9717	downstream
hESC	1614	6	19694811	19695029	218	19694896	29	24.5714	7	0	1	1	LOC105374959	-3826	upstream
hESC	1615	6	21742390	21742624	234	21742512	35	29.75	8	0	0	1	CASC15	76068	in gene
hESC	1616	6	24683680	24683919	239	24683808	43	33	8	0	0	1	ACOT13	16773	in gene
hESC	1617	6	26027153	26027503	350	26027328	85	60.7273	11	1	1	6	HIST1H1A, HIST1H3A, HIST1H4A, HIST1H4B, HIST1H3B, HIST1H2AB	-9516, 6838, 5649, -76, 4732, 6240	upstream, downstream, downstream, upstream, downstream, downstream
hESC	1618	6	26103674	26104102	428	26103872	96	56.6429	14	1	1	3	HFE, HIST1H4C, HIST1H1T	16591, -76, 4264	downstream, upstream, downstream
hESC	1619	6	26122823	26123267	444	26123040	134	79.0714	14	0	2	2	HIST1H2BC, HIST1H2AC	864, -1105	downstream, upstream
hESC	1620	6	26188960	26189331	371	26189136	98	67.1667	12	1	1	4	HIST1H2BE, HIST1H4D, HIST1H3D, HIST1H2AD	5340, -60, 10157, 10157	downstream, upstream, downstream, downstream
hESC	1621	6	26204339	26204728	389	26204528	87	61.5	12	1	3	4	HIST1H3D, HIST1H2AD, HIST1H2BF, HIST1H4E	-5235, -5235, 4969, -117	upstream, upstream, downstream, upstream
hESC	1622	6	26285440	26285737	297	26285568	96	70.5	10	1	3	3	LOC105374985, HIST1H4H, TRX-CAT1-3	-541, -69, -958	upstream, upstream, upstream
hESC	1623	6	26322128	26322330	202	26322144	25	18.8333	6	0	4	10	TRS-TGA3-1, TRX-CAT1-4, TRW-CCA3-2, TRR-TCG2-1, LOC101928743, TRS-AGA2-2, TRR-ACG1-2, TRX-CAT1-5, TRW-CCA3-3, LOC105374987	-9467, -8949, -2971, -674, 9980, -5445, -5996, 8228, 9371, -9700	upstream, upstream, upstream, upstream, downstream, upstream, upstream, downstream, downstream, upstream
hESC	1624	6	27139063	27139353	290	27139200	85	66	9	1	2	7	LOC105374995, HIST1H2BJ, HIST1H2AG, HIST1H2BK, HIST1H4I, HIST1H2AH, MIR3143	-8751, -6404, 6162, 7658, -109, -7882, -8426	upstream, upstream, downstream, in gene, upstream, upstream, upstream
hESC	1625	6	27472889	27473268	379	27473088	97	63.8333	12	1	4	4	ZNF184, LOC105375001, TRS-AGA2-3, TRD-GTC2-10	30, -103, -5724, -6586	in gene, upstream, upstream, upstream
hESC	1626	6	27792032	27792330	298	27792224	25	20.9	10	0	2	3	TRQ-CTG6-1, LOC105375000, TRQ-TTG3-3	-797, 503, 3708	upstream, in gene, downstream
hESC	1627	6	27823757	27824083	326	27823904	37	25.3	10	1	1	4	HIST1H2AJ, HIST1H2BM, HIST1H4J, HIST1H4K	-9164, 8860, -221, 7623	upstream, downstream, upstream, downstream
hESC	1628	6	29624542	29624784	242	29624672	31	25.375	8	0	0	1	GABBR1	8513	in gene
hESC	1629	6	30725715	30726168	453	30725920	46	34.6429	14	0	0	3	MDC1, TUBB, FLOT1	-7954, 5719, 16765	upstream, downstream, downstream
hESC	1630	6	30869157	30869359	202	30869248	13	11.6667	6	0	0	0
hESC	1631	6	31171927	31172207	280	31172064	28	24.3333	9	0	1	3	TCF19, POU5F1, PSORS1C3	13538, -1371, 5835	downstream, upstream, downstream
hESC	1632	6	32971882	32972239	357	32972048	26	24.0909	11	1	0	2	LOC105375109, BRD2	5343, 3388	in gene, in gene
hESC	1633	6	33118020	33118235	215	33118128	18	17.1667	6	0	0	0
hESC	1634	6	33124540	33124811	271	33124672	30	24.2222	9	0	0	1	LOC105375021	18628	downstream
hESC	1635	6	33200586	33200952	366	33200800	33	25.5455	11	1	5	6	COL11A2, RXRB, SLC39A7, HSD17B8, MIR219A1, RING1	-7648, 53, -26, -3837, -7035, -7709	upstream, in gene, upstream, upstream, upstream, upstream
hESC	1636	6	33322947	33323257	310	33323104	50	39.8889	9	1	2	3	TAPBP, ZBTB22, DAXX	-8717, -5162, -88	upstream, upstream, upstream
hESC	1637	6	33417960	33418299	339	33418096	45	37.1	10	1	2	4	KIFC1, PHF1, CUTA, SYNGAP1	26572, 7684, 192, -1974	downstream, downstream, in gene, upstream
hESC	1638	6	33788919	33789500	581	33789248	186	90.8333	18	1	2	3	LEMD2, LOC105375024, MLN	-85, 76, 14768	upstream, in gene, downstream
hESC	1639	6	33927307	33927548	241	33927376	25	21.2857	7	0	0	0
hESC	1640	6	34236690	34236910	220	34236768	33	27.1429	7	1	2	3	HMGA1, MIR6835, C6orf1	-32, -3905, 12340	upstream, upstream, downstream
hESC	1641	6	35037344	35037571	227	35037472	25	21.5	8	0	0	1	ANKS1A	148211	in gene
hESC	1642	6	35259484	35259788	304	35259584	28	20.4	10	1	2	3	SCUBE3, LOC101929285, ZNF76	45537, -186, 96	downstream, upstream, in gene
hESC	1643	6	35776329	35776531	202	35776384	16	14.6667	6	1	2	2	CLPSL2, CLPSL1	-210, -4670	upstream, upstream
hESC	1644	6	36027693	36027911	218	36027760	22	19.4286	7	1	2	2	SLC26A8, MAPK14	-3124, 125	upstream, in gene
hESC	1645	6	37499859	37500110	251	37500000	42	35.875	8	1	2	2	CCDC167, LOC100505530	-76, -7348	upstream, upstream
hESC	1646	6	40288997	40289204	207	40289056	22	18.3333	6	0	0	0
hESC	1647	6	40330495	40330698	203	40330576	26	23.4286	7	0	0	0
hESC	1648	6	40997685	40997887	202	40997728	41	32.8333	6	0	0	1	LOC101929555	25552	in gene
hESC	1649	6	42136595	42136818	223	42136736	44	37	7	0	0	1	C6orf132	6241	in gene
hESC	1650	6	42890379	42890692	313	42890464	31	25.7	10	1	1	3	RPL7L1, C6orf226, LOC105375063	10547, 352, 12571	downstream, in gene, downstream
hESC	1651	6	44257132	44257510	378	44257312	58	42.0833	12	1	2	4	HSP90AB1, SLC35B2, MIR4647, NFKBIE	11146, 578, -3027, 8476	downstream, in gene, upstream, downstream
hESC	1652	6	44542829	44543128	299	44542976	26	20.7778	9	0	0	1	LOC105375075	8996	downstream
hESC	1653	6	45901153	45901438	285	45901280	40	31.625	8	0	0	1	CLIC5	179068	in gene
hESC	1654	6	49142641	49142861	220	49142688	22	18.7143	7	0	0	0
hESC	1655	6	51814575	51814838	263	51814704	21	18.875	8	0	0	1	PKHD1	272921	in gene
hESC	1656	6	53061428	53062168	740	53061856	160	78.913	23	1	1	3	ICK, FBXO9, LOC105375092	-23, 4073, 3936	upstream, in gene, downstream
hESC	1657	6	56843174	56843409	235	56843264	28	23	7	1	1	2	DST, LOC101930010	111364, -722	in gene, upstream
hESC	1658	6	56843995	56844223	228	56844080	26	22.5714	7	1	1	2	DST, LOC101930010	110548, 94	in gene, in gene
hESC	1659	6	71420752	71420959	207	71420864	22	18.8333	6	1	2	2	LINC00472, LOC102724000	-119, -163	upstream, upstream
hESC	1660	6	73349304	73349646	342	73349440	29	21.4545	11	0	0	1	DPPA5	4836	downstream
hESC	1661	6	73521122	73521387	265	73521216	52	42.75	8	1	2	2	EEF1A1, LOC105377857	-184, -2402	upstream, upstream
hESC	1662	6	73580255	73580531	276	73580352	34	27	9	0	0	1	LOC105377857	56734	downstream
hESC	1663	6	73653995	73654376	381	73654176	61	43	12	1	1	1	SLC17A5	-162	upstream
hESC	1664	6	75213186	75213388	202	75213248	21	18	6	0	1	1	COL12A1	-7046	upstream
hESC	1665	6	84227527	84228001	474	84227728	93	61.6667	15	1	1	1	CEP162	162	in gene
hESC	1666	6	85670042	85670244	202	85670208	20	18.1429	7	0	0	3	SNHG5, SNORD50A, SNORD50B	8525, 7160, 7451	downstream, downstream, downstream
hESC	1667	6	87155327	87155737	410	87155616	33	27.6923	13	1	1	2	LOC101928870, ZNF292	3157, 65	downstream, in gene
hESC	1668	6	87172371	87172628	257	87172480	25	20.125	8	0	0	1	ZNF292	16929	in gene
hESC	1669	6	89678708	89678910	202	89678752	23	20.3333	6	0	0	2	LOC101929057, MDN1	40220, 149209	in gene, in gene
hESC	1670	6	89689688	89689963	275	89689856	22	17.1111	9	0	0	2	LOC101929057, MDN1	51324, 138105	downstream, in gene
hESC	1671	6	90484897	90485119	222	90484992	24	21.5	6	0	0	0
hESC	1672	6	90676531	90676838	307	90676640	32	24.7	10	0	0	0
hESC	1673	6	91299635	91299964	329	91299792	59	43.6	10	0	0	0
hESC	1674	6	93786451	93786731	280	93786560	29	22.5556	9	0	0	1	TSG1	79477	downstream
hESC	1675	6	93824898	93825376	478	93825088	40	27.2667	15	0	0	0
hESC	1676	6	93826008	93827247	1239	93826192	32	21.5128	39	0	0	0
hESC	1677	6	93828306	93829138	832	93828704	22	17.3462	26	0	0	0
hESC	1678	6	98525954	98526163	209	98526048	28	25.3333	6	0	0	1	LOC105377910	8154	downstream
hESC	1679	6	99425295	99425506	211	99425408	45	37.8571	7	1	2	3	PNISR, LOC101927365, USP45	-66, 537, 90369	upstream, in gene, downstream
hESC	1680	6	100892809	100893087	278	100892896	30	25.625	8	0	0	1	LOC102724422	11488	in gene
hESC	1681	6	106968944	106969252	308	106969152	30	24.1	10	0	0	1	CD24	7703	downstream
hESC	1682	6	108666868	108667157	289	108666976	21	16.8889	9	0	0	1	FOXO3	107153	in gene
hESC	1683	6	109095172	109095426	254	109095232	28	25.125	8	1	2	2	SESN1, CEP57L1	-727, 79	upstream, in gene
hESC	1684	6	109736663	109736866	203	109736784	25	22.5714	7	0	0	1	FIG4	45563	in gene
hESC	1685	6	109944523	109944850	327	109944672	25	19.4	10	0	0	0
hESC	1686	6	110511503	110511742	239	110511552	32	27.4286	7	0	0	0
hESC	1687	6	114362957	114363275	318	114363136	24	19.1	10	0	0	0
hESC	1688	6	114421251	114421466	215	114421328	30	26.8333	6	0	0	0
hESC	1689	6	127483382	127483719	337	127483552	22	17.4545	11	0	0	1	SOGA3	35803	in gene
hESC	1690	6	131322167	131322428	261	131322336	21	18.25	8	0	0	0
hESC	1691	6	131915987	131916346	359	131916117	26	21.8182	11	0	0	0
hESC	1692	6	131919998	131920223	225	131920032	21	18.8571	7	0	0	0
hESC	1693	6	131921309	131921649	340	131921472	19	15.8182	11	0	0	0
hESC	1694	6	133952976	133953196	220	133953088	21	17.7143	7	1	1	1	TBPL1	918	in gene
hESC	1695	6	135250867	135251189	322	135250976	23	20	10	0	0	0
hESC	1696	6	136550601	136550829	228	136550736	23	20.8571	7	1	2	3	MAP7, LOC105378015, MAP3K5	83, 315, 242315	in gene, in gene, downstream
hESC	1697	6	137002023	137002246	223	137002144	25	20	7	0	0	2	NHEG1, IL20RA	-8913, 43222	upstream, in gene
hESC	1698	6	139627141	139627349	208	139627264	23	21.1667	6	0	0	0
hESC	1699	6	140372114	140372316	202	140372176	15	13	6	0	0	0
hESC	1700	6	143746588	143746910	322	143746720	64	46.8	10	0	0	1	PHACTR2	138540	in gene
hESC	1701	6	144896051	144896329	278	144896160	22	17.7778	9	0	0	0
hESC	1702	6	148972554	148972776	222	148972656	27	23.8571	7	0	0	2	UST, LOC100128176	225694, -7972	in gene, upstream
hESC	1703	6	151452037	151452443	406	151452224	158	101.333	12	1	2	2	RMND1, ARMT1	-43, -34	upstream, upstream
hESC	1704	6	153831802	153832004	202	153831915	19	16.8571	7	0	0	0
hESC	1705	6	155120172	155120389	217	155120256	40	34.2857	7	0	0	1	TIAM2	29967	in gene
hESC	1706	6	155894784	155895089	305	155894944	29	24.2	10	0	0	2	LOC105378072, LOC101928923	101603, 478814	in gene, in gene
hESC	1707	6	156655637	156655991	354	156655776	33	23	11	0	0	0
hESC	1708	6	157552373	157552697	324	157552512	37	29.3	10	0	1	2	ZDHHC14, LOC105378077	170987, -5719	in gene, upstream
hESC	1709	6	158468060	158468285	225	158468160	24	20.7143	7	0	0	1	TULP4	235924	in gene
hESC	1710	6	158819497	158819832	335	158819669	25	21.6	10	1	2	2	EZR, EZR-AS1	-245, 1690	upstream, in gene
hESC	1711	6	158853475	158853822	347	158853664	26	22.7	10	0	1	1	LOC105378080	-4416	upstream
hESC	1712	6	158922335	158922602	267	158922448	30	24.3333	9	0	0	1	C6orf99	52593	downstream
hESC	1713	6	159074377	159074624	247	159074464	44	34.75	8	0	0	1	LOC105378081	47003	in gene
hESC	1714	6	159726747	159727007	260	159726912	27	22.125	8	1	1	1	WTAP	-86	upstream
hESC	1715	6	159968768	159968970	202	159968816	20	17.2857	7	1	1	1	IGF2R	-283	upstream
hESC	1716	6	160132499	160132759	260	160132608	18	16	8	0	0	1	SLC22A1	10819	in gene
hESC	1717	6	168979342	168979569	227	168979392	23	19	7	0	0	1	LOC105378145	14992	in gene
hESC	1718	6	169827147	169827389	242	169827280	29	26.5714	7	0	0	0
hESC	1719	6	170295708	170295975	267	170295808	22	19.4444	9	1	0	2	DLL1, FAM120B	10747, 5105	in gene, in gene
hESC	1720	7	96950	97202	252	97040	40	32.25	8	0	0	0
hESC	1721	7	665374	665604	230	665568	17	15.125	8	0	0	1	PRKAR1B	62108	in gene
hESC	1722	7	876047	876578	531	876352	150	84.8235	17	1	1	2	SUN1, GET4	60795, -202	downstream, upstream
hESC	1723	7	2555448	2555978	530	2555616	36	29.2353	17	1	2	2	BRAT1, IQCE	142, -3356	in gene, upstream
hESC	1724	7	2558489	2559260	771	2558944	317	145.375	24	1	2	2	BRAT1, IQCE	-3186, -28	upstream, upstream
hESC	1725	7	2821369	2821763	394	2821568	45	31	13	0	0	1	GNA12	49088	in gene
hESC	1726	7	4775374	4775839	465	4775648	84	52.9286	14	1	1	2	FOXK1, AP5Z1	130957, 17	downstream, in gene
hESC	1727	7	5045487	5045844	357	5045664	87	58.6364	11	1	2	2	RBAK-RBAKDN, RBAK	-157, -157	upstream, upstream
hESC	1728	7	5407706	5407948	242	5407792	25	20.625	8	0	0	1	TNRC18	15754	in gene
hESC	1729	7	5423968	5424211	243	5424112	35	28.375	8	1	1	2	TNRC18, LOC100129484	-566, 6911	upstream, downstream
hESC	1730	7	5425447	5425820	373	5425600	71	50.0909	11	1	1	2	TNRC18, LOC100129484	-2054, 5423	upstream, downstream
hESC	1731	7	6729450	6729772	322	6729600	59	41.3	10	1	0	0
hESC	1732	7	7352931	7353156	225	7353056	32	27.2857	7	0	0	1	COL28A1	184221	in gene
hESC	1733	7	7581680	7581885	205	7581760	26	23	6	0	0	1	MIOS	14869	in gene
hESC	1734	7	12424183	12424423	240	12424288	36	28.25	8	0	0	1	LOC105375155	19511	downstream
hESC	1735	7	20053422	20053954	532	20053536	40	26.8824	17	0	0	1	LOC101927668	86890	in gene
hESC	1736	7	20650873	20651121	248	20651008	35	29.25	8	0	0	1	ABCB5	35386	in gene
hESC	1737	7	23597200	23597415	215	23597280	22	19.4286	7	1	2	2	LOC105375187, CCDC126	-14, -99	upstream, upstream
hESC	1738	7	23802314	23802532	218	23802432	16	13.2857	7	0	0	1	STK31	92265	in gene
hESC	1739	7	24406926	24407292	366	24407072	25	21.6364	11	0	0	0
hESC	1740	7	24408497	24409427	930	24409248	34	24.6897	29	0	0	0
hESC	1741	7	24427117	24427378	261	24427232	31	23.875	8	0	0	0
hESC	1742	7	24435047	24435310	263	24435136	40	34	8	0	0	0
hESC	1743	7	24726177	24726579	402	24726368	61	40.9167	12	0	0	1	DFNA5	31652	in gene
hESC	1744	7	25732826	25733083	257	25732992	29	25.5	8	0	0	0
hESC	1745	7	25895586	25896234	648	25896000	192	95.85	20	0	0	0
hESC	1746	7	26115682	26115941	259	26115760	34	27.5	8	0	0	2	LOC105375199, LOC105375198	15170, 14122	in gene, in gene
hESC	1747	7	26186966	26187197	231	26187056	17	15.2857	7	0	1	3	NFE2L3, LOC105375201, HNRNPA2B1	34829, -1770, 13737	in gene, upstream, downstream
hESC	1748	7	26187557	26188015	458	26187840	31	24.5714	14	0	1	3	NFE2L3, LOC105375201, HNRNPA2B1	35613, -2554, 12953	downstream, upstream, downstream
hESC	1749	7	26200774	26201066	292	26200864	76	57.3333	9	1	2	2	HNRNPA2B1, CBX3	-71, -347	upstream, upstream
hESC	1750	7	26864738	26865106	368	26864880	70	53.5455	11	1	1	2	SKAP2, LOC105375204	-137, 59369	upstream, downstream
hESC	1751	7	27030450	27030673	223	27030544	38	31.1429	7	0	0	0
hESC	1752	7	28291626	28291848	222	28291712	33	27.8571	7	0	1	1	CREB5	-7609	upstream
hESC	1753	7	31371652	31371937	285	31371744	31	22.2222	9	0	0	0
hESC	1754	7	35800521	35801268	747	35800880	43	33	23	1	2	2	SEPT7-AS1, SEPT7	-255, -106	upstream, upstream
hESC	1755	7	36360325	36360577	252	36360432	41	32.25	8	0	0	1	KIAA0895	29693	in gene
hESC	1756	7	40134637	40134839	202	40134720	26	22	6	1	2	2	MPLKIP, SUGCT	-68, -245	upstream, upstream
hESC	1757	7	41059504	41059793	289	41059616	51	38.7778	9	0	0	0
hESC	1758	7	41808390	41808907	517	41808640	88	60.9375	16	0	0	0
hESC	1759	7	42091816	42092040	224	42091872	35	29.8571	7	0	0	1	GLI3	172240	in gene
hESC	1760	7	42911986	42912285	299	42912160	27	21.2222	9	1	1	2	C7orf25, PSMA2	-70, 20046	upstream, downstream
hESC	1761	7	43141170	43141380	210	43141280	20	18.4286	7	0	0	3	HECW1, HECW1-IT1, MIR3943	28681, 23316, -9615	in gene, downstream, upstream
hESC	1762	7	44490557	44491109	552	44490848	89	49.3333	18	1	1	1	NUDCD3	30	in gene
hESC	1763	7	45923817	45924072	255	45923952	44	36.625	8	0	1	1	IGFBP3	-2680	upstream
hESC	1764	7	47470764	47470972	208	47470816	28	23.6667	6	0	0	1	TNS3	111737	in gene
hESC	1765	7	48089236	48089517	281	48089376	24	19.8889	9	1	1	1	UPP1	773	in gene
hESC	1766	7	51950156	51950487	331	51950320	62	45.3	10	0	0	0
hESC	1767	7	54781550	54781876	326	54781664	30	23.3	10	0	0	1	LOC100996654	22351	in gene
hESC	1768	7	65982177	65982379	202	65982272	26	23.6667	6	1	1	1	GUSB	42	in gene
hESC	1769	7	69232560	69233039	479	69232864	66	42.6667	15	0	0	0
hESC	1770	7	69608954	69609197	243	69609088	31	26.375	8	0	0	1	AUTS2	10613	in gene
hESC	1771	7	70894302	70894504	202	70894421	26	24.4286	7	0	0	0
hESC	1772	7	71457100	71457417	317	71457248	35	27.4	10	0	0	1	WBSCR17	324834	in gene
hESC	1773	7	71682835	71683162	327	71682976	43	32.7	10	0	0	1	WBSCR17	550562	in gene
hESC	1774	7	71739865	71740146	281	71740016	30	24.8889	9	0	0	0
hESC	1775	7	72879070	72879274	204	72879200	29	22.2857	7	1	1	1	POM121	-135	upstream
hESC	1776	7	74173973	74174196	223	74174016	27	23	7	1	1	1	EIF4H	-360	upstream
hESC	1777	7	75486313	75486631	318	75486432	44	31.8	10	1	2	2	POM121C, SPDYE5	-144, -6750	upstream, upstream
hESC	1778	7	75528179	75528461	282	75528288	52	39.3333	9	1	0	1	HIP1	210684	downstream
hESC	1779	7	76163893	76164223	330	76164032	62	48.2	10	0	2	2	LOC101927126, SRRM3	356, -2643	in gene, upstream
hESC	1780	7	76549012	76549299	287	76549120	33	26.1111	9	1	1	4	LOC105375354, SPDYE16, LOC100133091, LOC105375357	24737, -7636, -221, 29689	downstream, upstream, upstream, downstream
hESC	1781	7	78563121	78563463	342	78563264	25	18.3636	11	0	0	1	MAGI2	890541	in gene
hESC	1782	7	79452260	79452468	208	79452384	21	19	6	1	2	2	MAGI2, MAGI2-AS3	1421, -573	in gene, upstream
hESC	1783	7	80127839	80128047	208	80127904	33	28.4286	7	0	1	1	GNAI1	-6920	upstream
hESC	1784	7	80764214	80764537	323	80764384	35	28.9	10	0	0	1	SEMA3C	154967	in gene
hESC	1785	7	81245455	81245718	263	81245552	26	22.125	8	0	0	0
hESC	1786	7	83465986	83466188	202	83466080	21	19.1667	6	0	0	2	SEMA3E, LOC105375378	183083, 16169	in gene, downstream
hESC	1787	7	83466513	83466715	202	83466528	18	15.8333	6	0	0	2	SEMA3E, LOC105375378	182635, 15721	in gene, downstream
hESC	1788	7	83467210	83467625	415	83467280	25	20.8462	13	0	0	2	SEMA3E, LOC105375378	181883, 14969	in gene, downstream
hESC	1789	7	83468424	83468768	344	83468608	23	18.6364	11	0	0	2	SEMA3E, LOC105375378	180555, 13641	in gene, downstream
hESC	1790	7	83685033	83685317	284	83685152	31	25.8889	9	0	0	0
hESC	1791	7	83695483	83695739	256	83695552	32	26.625	8	0	0	0
hESC	1792	7	84228602	84228814	212	84228736	33	29	7	0	0	1	SEMA3A	263988	in gene
hESC	1793	7	91264222	91264690	468	91264384	95	55.8667	15	1	1	1	FZD1	-84	upstream
hESC	1794	7	91603793	91604003	210	91603872	18	16.2857	7	0	0	0
hESC	1795	7	92763767	92764005	238	92763872	33	27	8	0	0	1	CDK6	72755	in gene
hESC	1796	7	93232189	93232520	331	93232352	53	38.4545	11	0	2	2	HEPACAM2, CCDC132	-55, 12	upstream, in gene
hESC	1797	7	94223716	94223923	207	94223808	42	37.1667	6	0	0	0
hESC	1798	7	96143673	96143943	270	96143808	34	26.2222	9	0	0	1	SLC25A13	178339	in gene
hESC	1799	7	98106703	98106969	266	98106880	30	24.875	8	1	1	1	LMTK2	5	in gene
hESC	1800	7	101936929	101937252	323	101937088	63	46	10	0	0	1	CUX1	121184	in gene
hESC	1801	7	102363585	102363790	205	102363712	43	38.6667	6	1	3	3	SPDYE6, LOC100630923, LOC100289561	-6665, -149, -149	upstream, upstream, upstream
hESC	1802	7	102396045	102396547	502	102396176	28	23.125	16	1	1	3	LOC100630923, PRKRIP1, MIR548O	32315, -181, 9679	in gene, upstream, downstream
hESC	1803	7	103149432	103149810	378	103149568	32	24.8333	12	1	2	2	NAPEPLD, LOC105375434	-246, -167	upstream, upstream
hESC	1804	7	104772366	104772670	304	104772496	48	37	9	0	0	1	LHFPL3	443840	in gene
hESC	1805	7	104983476	104983832	356	104983584	21	17.0909	11	1	0	2	LOC101927902, LINC01004	42651, 7581	in gene, in gene
hESC	1806	7	104983914	104984213	299	104984064	31	24.2222	9	1	0	2	LOC101927902, LINC01004	43131, 7101	in gene, in gene
hESC	1807	7	106905878	106906108	230	106905920	19	15.8571	7	0	0	1	PIK3CG	40642	in gene
hESC	1808	7	108593761	108593987	226	108593840	24	20.8571	7	0	0	1	LOC105375448	16422	in gene
hESC	1809	7	114825735	114825993	258	114825824	28	22.375	8	0	0	0
hESC	1810	7	119362215	119362474	259	119362336	40	31.375	8	0	0	0
hESC	1811	7	122329248	122329472	224	122329376	32	28.625	8	0	0	1	CADPS2	557383	in gene
hESC	1812	7	128273391	128273602	211	128273536	26	23	7	0	0	0
hESC	1813	7	129843613	129843913	300	129843744	58	43	10	0	0	1	UBE2H	109216	in gene
hESC	1814	7	129879900	129880109	209	129880000	21	18.2857	7	0	0	1	UBE2H	72960	in gene
hESC	1815	7	131605506	131605772	266	131605600	49	39.5	8	0	0	0
hESC	1816	7	133197324	133197540	216	133197408	36	30.7143	7	0	0	0
hESC	1817	7	134028893	134029233	340	134029056	57	38.1818	11	0	0	1	EXOC4	775989	in gene
hESC	1818	7	135753621	135753983	362	135753803	23	19.2727	11	0	2	2	FAM180A, LOC105375522	-4936, -4654	upstream, upstream
hESC	1819	7	136399470	136399780	310	136399616	31	22.1	10	0	0	1	LOC105375523	373994	in gene
hESC	1820	7	138207495	138207910	415	138207680	63	40.5385	13	0	0	0
hESC	1821	7	140455800	140456026	226	140455888	21	18	7	0	0	1	MKRN1	23681	in gene
hESC	1822	7	142365555	142365854	299	142365680	40	32.3333	9	0	0	1	TRB	66669	in gene
hESC	1823	7	143906985	143907210	225	143907104	25	21.7143	7	0	2	3	TCAF1, LOC105375549, OR2F1	-4906, 21658, -22	upstream, downstream, upstream
hESC	1824	7	144127804	144128038	234	144127872	24	21.5	8	0	1	1	OR2A14	-1241	upstream
hESC	1825	7	148020673	148020940	267	148020800	47	37.75	8	0	0	1	CNTNAP2	1904439	in gene
hESC	1826	7	149144370	149144612	242	149144448	20	16.75	8	0	0	1	ZNF398	18032	in gene
hESC	1827	7	150329820	150330027	207	150329920	31	26.5714	7	0	2	5	ACTR3C, LRRC61, ZBED6CL, LOC105375560, RARRES2	-6251, 7281, 71, 4398, 11754	upstream, in gene, in gene, downstream, downstream
hESC	1828	7	150401897	150402376	479	150401952	31	26.7333	15	0	1	2	ZNF775, LOC728743	22651, -3800	downstream, upstream
hESC	1829	7	151062355	151062745	390	151062464	35	26.75	12	0	1	3	ASIC3, CDK5, SLC4A2	14172, -4499, 4252	downstream, upstream, in gene
hESC	1830	7	151277156	151277377	221	151277248	44	38.2857	7	1	1	1	SMARCD3	-99	upstream
hESC	1831	7	151471711	151472025	314	151471840	41	31	10	0	0	1	RHEB	48084	in gene
hESC	1832	7	156585164	156585695	531	156585472	41	28.5	16	0	0	1	LINC01006	17723	in gene
hESC	1833	7	157310433	157310883	450	157310528	29	23	14	0	0	0
hESC	1834	7	157962231	157962445	214	157962368	21	18.4286	7	0	0	1	PTPRN2	625428	in gene
hESC	1835	7	159141731	159142020	289	159141888	21	18.4444	9	0	0	1	VIPR2	3069	in gene
hESC	1836	8	3245172	3245595	423	3245408	38	26	13	0	0	1	CSMD1	1749398	in gene
hESC	1837	8	10419285	10419519	234	10419360	25	21.4286	7	0	0	1	MSRA	365136	in gene
hESC	1838	8	11201594	11201845	251	11201728	17	14.5	8	1	1	1	XKR6	-347	upstream
hESC	1839	8	20353241	20353523	282	20353344	39	29	9	0	0	1	LOC105379314	9960	in gene
hESC	1840	8	20458279	20458501	222	20458400	48	39.7143	7	0	0	0
hESC	1841	8	23979284	23979578	294	23979392	53	42.8889	9	0	0	0
hESC	1842	8	25508891	25509229	338	25509056	59	39.9091	11	0	0	1	CDCA2	50482	in gene
hESC	1843	8	25958515	25958758	243	25958624	39	29.625	8	0	0	1	EBF2	86500	in gene
hESC	1844	8	26578541	26578743	202	26578592	30	26.8333	6	1	0	1	DPYSL2	64399	in gene
hESC	1845	8	26636990	26637315	325	26637120	47	34.7273	11	0	0	1	DPYSL2	122927	in gene
hESC	1846	8	29585286	29585581	295	29585376	43	33.6667	9	0	0	2	LOC105379351, LOC105379352	21349, -10120	downstream, upstream
hESC	1847	8	31238959	31239228	269	31239040	30	25	8	0	0	0
hESC	1848	8	31478809	31479063	254	31478912	34	27.625	8	0	0	0
hESC	1849	8	35377295	35377629	334	35377440	78	57.9	10	0	0	1	UNC5D	141983	in gene
hESC	1850	8	38440637	38440970	333	38440768	37	29.3636	11	0	0	1	FGFR1	28066	in gene
hESC	1851	8	38512377	38512800	423	38512544	66	45.5714	14	0	0	1	C8orf86	16121	in gene
hESC	1852	8	42843198	42843559	361	42843344	35	29.3333	12	2	1	2	THAP1, RNF170	-13, 54587	upstream, downstream
hESC	1853	8	48051707	48051913	206	48051744	23	18.2857	7	0	0	1	UBE2V2	53456	in gene
hESC	1854	8	48254143	48254365	222	48254240	25	20.8571	7	0	0	0
hESC	1855	8	49716757	49717003	246	49716832	35	28	8	0	0	0
hESC	1856	8	53766539	53766799	260	53766640	21	17.75	8	0	0	1	ATP6V1H	76671	in gene
hESC	1857	8	53843013	53843498	485	53843264	52	36.8667	15	1	1	2	ATP6V1H, RGS20	47, -8544	in gene, upstream
hESC	1858	8	59055112	59055338	226	59055168	26	22.5714	7	0	0	1	TOX	64040	in gene
hESC	1859	8	60281259	60281461	202	60281344	22	18.1667	6	1	1	2	CA8, LOC105375864	51, 104052	in gene, downstream
hESC	1860	8	60328725	60328938	213	60328800	37	32.1429	7	0	0	1	LOC105375864	56596	in gene
hESC	1861	8	61823603	61823822	219	61823648	23	20.8571	7	0	1	2	LOC101929628, LOC105375871	38576, 1576	in gene, in gene
hESC	1862	8	65185687	65185897	210	65185728	36	30.1429	7	0	1	1	LINC00251	-5388	upstream
hESC	1863	8	66775025	66775391	366	66775216	22	19.3636	11	1	0	2	C8orf44-SGK3, SGK3	107664, 62798	in gene, in gene
hESC	1864	8	67368980	67369250	270	67369088	51	37.8889	9	0	0	1	LOC102724708	25441	in gene
hESC	1865	8	69561436	69561710	274	69561568	33	26.6667	9	0	0	1	SULF1	94944	in gene
hESC	1866	8	69954402	69954623	221	69954528	19	17.1667	6	0	0	0
hESC	1867	8	70061142	70061521	379	70061312	51	35.1667	12	0	0	1	PRDM14	10015	in gene
hESC	1868	8	71219070	71219272	202	71219168	35	29.8571	7	0	0	1	EYA1	328941	in gene
hESC	1869	8	71704131	71704634	503	71704416	20	17.5333	15	0	0	0
hESC	1870	8	71848642	71848873	231	71848800	29	24.4286	7	0	1	2	MSC, MSC-AS1	-4304, 5677	upstream, in gene
hESC	1871	8	73001916	73002298	382	73002144	46	33.4167	12	0	1	1	TERF1	-6718	upstream
hESC	1872	8	75219149	75219382	233	75219200	25	22.4286	7	0	0	1	CASC9	59689	downstream
hESC	1873	8	75407107	75407407	300	75407216	27	22.6667	9	1	1	1	HNF4G	-465	upstream
hESC	1874	8	77000001	77000389	388	77000192	75	49	12	1	2	2	PEX2, LOC105375907	852, -133	in gene, upstream
hESC	1875	8	85461843	85462065	222	85461952	34	27.8571	7	0	1	2	LOC100996348, CA2	2963, -1950	in gene, upstream
hESC	1876	8	85921272	85921702	430	85921472	83	55.4286	14	0	0	0
hESC	1877	8	88592138	88592391	253	88592224	27	21.5	8	0	0	1	LOC105375629	6648	in gene
hESC	1878	8	90927848	90928161	313	90928000	41	29.9	10	0	0	2	NECAB1, LOC105375634	136307, 25980	in gene, in gene
hESC	1879	8	96261603	96261829	226	96261632	18	15.7143	7	1	2	3	MTERF3, PTDSS1, LOC105375652	-19, -254, 22369	upstream, upstream, downstream
hESC	1880	8	100667554	100667908	354	100667680	40	30.1818	11	0	1	2	SNX31, LOC105375672	-4270, 4068	upstream, in gene
hESC	1881	8	101041644	101041863	219	101041728	16	12.7143	7	0	0	0
hESC	1882	8	101437017	101437346	329	101437184	28	21.0909	11	0	0	0
hESC	1883	8	102436801	102437028	227	102436960	38	31.8571	7	0	0	1	LOC105375683	24018	in gene
hESC	1884	8	102535814	102536305	491	102535984	39	29.4667	15	0	0	1	LOC105375684	15591	downstream
hESC	1885	8	103020905	103021285	380	103021088	77	53.75	12	1	1	1	ATP6V1C1	68	in gene
hESC	1886	8	104029088	104029290	202	104029152	31	25.8571	7	0	0	1	RIMS2	528510	in gene
hESC	1887	8	111150909	111151144	235	111150976	31	25.25	8	0	0	1	LOC101927487	85227	in gene
hESC	1888	8	111916908	111917129	221	111917056	25	22.2857	7	0	0	0
hESC	1889	8	112395568	112395884	316	112395712	42	30.7	10	0	0	1	CSMD3	1041755	in gene
hESC	1890	8	116128345	116128589	244	116128448	43	34.625	8	0	0	1	LINC00536	196611	in gene
hESC	1891	8	121252873	121253087	214	121252992	22	20.1667	6	0	0	0
hESC	1892	8	123479529	123479889	360	123479776	30	24.8182	11	0	0	0
hESC	1893	8	124450598	124450830	232	124450720	39	33.4286	7	0	1	1	TRMT12	-87	upstream
hESC	1894	8	125091576	125092015	439	125091792	86	57.8571	14	1	2	2	KIAA0196, NSMCE2	27, -26	in gene, upstream
hESC	1895	8	125386769	125387054	285	125386880	39	30.3333	9	0	0	0
hESC	1896	8	126448735	126449006	271	126448864	45	32.8889	9	0	0	0
hESC	1897	8	127043680	127043975	295	127043840	31	23.3	10	0	0	0
hESC	1898	8	127810081	127810535	454	127810325	35	28.2143	14	0	0	0
hESC	1899	8	127818144	127818461	317	127818272	46	34.2	10	0	0	0
hESC	1900	8	127855114	127855388	274	127855232	54	44.375	8	0	0	0
hESC	1901	8	127862733	127863002	269	127862896	23	20.375	8	0	0	0
hESC	1902	8	140331645	140332016	371	140331872	44	31	12	0	0	1	TRAPPC9	126707	in gene
hESC	1903	8	143597094	143597387	293	143597248	38	30.4444	9	1	2	4	EEF1D, LOC105375797, TIGD5, PYCRL	427, 4782, -656, 12366	in gene, downstream, upstream, downstream
hESC	1904	8	144522138	144522758	620	144522304	38	26.15	20	1	1	5	RECQL4, LRRC14, LRRC24, C8orf82, ARHGAP39	-4477, 4339, 4728, 6770, 178216	upstream, in gene, downstream, downstream, downstream
hESC	1905	8	144526657	144526996	339	144526768	20	16.8	10	1	2	5	RECQL4, LRRC14, LRRC24, C8orf82, ARHGAP39	-8941, 8803, 264, 2306, 173752	upstream, downstream, in gene, in gene, downstream
hESC	1906	8	144762347	144762571	224	144762368	21	19.1429	7	0	1	3	ZNF251, LOC105375805, ZNF34	-6783, 7884, 24991	upstream, downstream, downstream
hESC	1907	9	331249	331503	254	331392	33	27.125	8	0	0	1	DOCK8	116527	in gene
hESC	1908	9	674233	674471	238	674368	31	25.375	8	0	0	1	KANK1	204074	in gene
hESC	1909	9	840385	840648	263	840512	40	32	8	0	1	1	DMRT1	-1135	upstream
hESC	1910	9	4741008	4741210	202	4741120	16	15	6	1	1	1	AK3	923	in gene
hESC	1911	9	6704038	6704384	346	6704192	50	37.4545	11	1	1	1	LOC105375968	-81	upstream
hESC	1912	9	6757678	6758058	380	6757856	50	35.1667	12	1	0	1	KDM4C	36993	in gene
hESC	1913	9	6771798	6772151	353	6771968	37	26.4545	11	0	0	1	KDM4C	51105	in gene
hESC	1914	9	6777328	6777603	275	6777424	32	25.5556	9	0	0	1	KDM4C	56561	in gene
hESC	1915	9	14542185	14542393	208	14542304	27	25	6	0	0	0
hESC	1916	9	14722685	14723024	339	14722816	45	32	11	0	1	1	CER1	-99	upstream
hESC	1917	9	16768900	16769169	269	16769024	45	37.125	8	0	0	1	BNC2	101814	in gene
hESC	1918	9	16810074	16810541	467	16810368	31	25.4	15	0	0	1	BNC2	60470	in gene
hESC	1919	9	19699071	19699279	208	19699152	30	25.8571	7	0	0	1	SLC24A2	90543	in gene
hESC	1920	9	19788183	19788423	240	19788224	25	20.375	8	1	1	1	SLC24A2	1471	in gene
hESC	1921	9	20111564	20111771	207	20111664	30	27.1667	6	0	0	0
hESC	1922	9	26947080	26947493	413	26947200	46	36.2308	13	1	2	3	PLAA, IFT74, IFT74-AS1	270, 161, 9107	in gene, in gene, downstream
hESC	1923	9	27308813	27309023	210	27308896	23	20.5	6	0	0	0
hESC	1924	9	27333315	27333644	329	27333472	95	66.3	10	0	0	1	MOB3B	196380	in gene
hESC	1925	9	27749876	27750145	269	27750016	34	27.1111	9	0	0	0
hESC	1926	9	31259789	31260057	268	31259920	20	16.375	8	0	0	0
hESC	1927	9	32345271	32345583	312	32345392	68	47.9	10	0	0	0
hESC	1928	9	32552255	32552558	303	32552352	36	29.3	10	1	2	3	TOPORS, TOPORS-AS1, NDUFB6	276, 1208, 20832	in gene, in gene, downstream
hESC	1929	9	38017222	38017459	237	38017312	23	20.7143	7	0	0	1	SHB	51901	in gene
hESC	1930	9	38214525	38214729	204	38214576	38	32.4286	7	0	0	0
hESC	1931	9	38672481	38672758	277	38672576	48	37.75	8	0	0	0
hESC	1932	9	42323538	42323803	265	42323616	44	33.375	8	0	0	0
hESC	1933	9	66797963	66798243	280	66798096	30	21.3333	9	0	0	0
hESC	1934	9	68872100	68872528	428	68872288	65	42.6923	13	0	0	1	PIP5K1B	167071	in gene
hESC	1935	9	71756811	71757159	348	71756976	42	31.1818	11	0	0	1	TMEM2	12490	in gene
hESC	1936	9	74103043	74103312	269	74103136	18	15.25	8	0	0	0
hESC	1937	9	77128543	77128836	293	77128672	61	43.1	10	0	0	0
hESC	1938	9	77440230	77440441	211	77440320	28	25.1667	6	0	1	2	GNA14, GNA14-AS1	207996, -7329	in gene, upstream
hESC	1939	9	77534592	77534794	202	77534688	29	24	7	0	0	2	GNA14, GNA14-AS1	113628, 87039	in gene, downstream
hESC	1940	9	79395942	79396178	236	79396032	23	19.1429	7	0	0	0
hESC	1941	9	81596115	81596479	364	81596272	97	67.3636	11	0	0	2	TLE1, LOC105376106	93263, 8484	in gene, downstream
hESC	1942	9	86187100	86187398	298	86187264	51	37.1	10	0	0	0
hESC	1943	9	86281754	86282210	456	86281984	40	31.1333	15	1	1	2	ISCA1, ZCCHC6	591, 72517	in gene, downstream
hESC	1944	9	86410345	86410580	235	86410480	50	42.4286	7	0	1	1	LOC102724080	-3740	upstream
hESC	1945	9	88378447	88378701	254	88378528	46	37	8	0	0	1	SPIN1	-9854	upstream
hESC	1946	9	91886732	91886948	216	91886832	27	23.7143	7	0	0	1	ROR2	63330	in gene
hESC	1947	9	92097954	92098336	382	92098080	75	48.8333	12	0	0	1	SPTLC1	17394	in gene
hESC	1948	9	92670073	92670385	312	92670208	45	33.4	10	1	1	1	IPPK	57	in gene
hESC	1949	9	92877943	92878334	391	92878144	155	99.25	12	0	1	1	ZNF484	-86	upstream
hESC	1950	9	93364958	93365162	204	93365072	23	19.8571	7	0	0	0
hESC	1951	9	93365369	93365989	620	93365536	38	25.95	20	0	0	0
hESC	1952	9	94825438	94825657	219	94825536	37	32	7	0	0	1	C9orf3	98932	in gene
hESC	1953	9	95130564	95130861	297	95130688	30	24.2222	9	0	0	2	C9orf3, FANCC	404084, 187021	in gene, in gene
hESC	1954	9	95448104	95448404	300	95448256	58	45.1111	9	0	0	1	PTCH1	68709	in gene
hESC	1955	9	95875534	95875754	220	95875680	27	23.1429	7	1	3	3	LINC00476, LOC105376160, ERCC6L2	297, -6100, 62	in gene, upstream, in gene
hESC	1956	9	97214544	97214748	204	97214624	18	16.3333	6	0	0	1	LOC105376165	-7948	upstream
hESC	1957	9	97922092	97922572	480	97922304	197	121.2	15	1	1	2	C9orf156, HEMGN	266, 22611	in gene, downstream
hESC	1958	9	98218864	98219076	212	98218976	23	17	7	0	0	1	TBC1D2	36745	in gene
hESC	1959	9	98255771	98256106	335	98255920	41	32.1818	11	1	1	1	TBC1D2	-199	upstream
hESC	1960	9	100134218	100134447	229	100134325	20	18.4286	7	0	0	1	INVS	35140	in gene
hESC	1961	9	100134537	100134783	246	100134688	21	16.7143	7	0	0	1	INVS	35503	in gene
hESC	1962	9	104886117	104886425	308	104886224	40	31.5556	9	0	0	1	ABCA1	42022	in gene
hESC	1963	9	112098375	112098590	215	112098464	29	26.3333	6	0	0	1	SUSD1	77056	in gene
hESC	1964	9	113056542	113056901	359	113056704	100	67.1667	12	1	1	1	ZFP37	87	in gene
hESC	1965	9	114587561	114587991	430	114587744	62	46.4615	13	1	1	1	ATP6V1G1	30	in gene
hESC	1966	9	119963883	119964205	322	119964000	43	32.8	10	0	0	0
hESC	1967	9	120580074	120580491	417	120580256	140	84.8462	13	1	2	2	CDK5RAP2, LOC105376254	-86, -972	upstream, upstream
hESC	1968	9	122001873	122002125	252	122001984	40	29.875	8	0	0	1	TTLL11	91622	in gene
hESC	1969	9	123268784	123268991	207	123268864	34	29.8333	6	1	1	1	STRBP	-288	upstream
hESC	1970	9	123326777	123327001	224	123326880	42	34	7	0	1	1	LOC105376265	-4270	upstream
hESC	1971	9	123482579	123482781	202	123482688	26	22	6	0	0	2	DENND1A, MIR7150	447450, 2934	in gene, downstream
hESC	1972	9	123863262	123863526	264	123863392	31	25.8889	9	0	0	1	DENND1A	66746	in gene
hESC	1973	9	124760775	124761015	240	124760864	43	37.7143	7	0	0	1	NR6A1	10446	in gene
hESC	1974	9	125200299	125200627	328	125200480	29	23.9	10	1	2	2	LOC105376271, RABEPK	-84, -62	upstream, upstream
hESC	1975	9	126676766	126677097	331	126676928	67	46.9091	11	0	0	1	LMX1B	62485	in gene
hESC	1976	9	127112056	127112269	213	127112224	25	22.4286	7	0	0	2	RALGPS1, ANGPTL2	197450, 10573	in gene, in gene
hESC	1977	9	127353935	127354182	247	127354080	34	27.875	8	0	0	1	GARNL3	129609	in gene
hESC	1978	9	127446126	127446384	258	127446208	28	23.5	8	0	2	4	ZNF79, RPL12, SNORA65, LRSAM1	21834, 5224, 2429, -5278	in gene, downstream, downstream, upstream
hESC	1979	9	127451378	127451590	212	127451440	31	28	7	1	3	4	ZNF79, RPL12, SNORA65, LRSAM1	27066, -8, -2803, -46	downstream, upstream, upstream, upstream
hESC	1980	9	127715606	127715808	202	127715728	28	24.4286	7	1	2	3	C9orf117, PTRH1, TTC16	8740, 986, -336	in gene, in gene, upstream
hESC	1981	9	128067225	128067466	241	128067328	47	40	8	1	2	2	NAIF1, SLC25A25	-7, -872	upstream, upstream
hESC	1982	9	128364964	128365310	346	128365104	64	47.2	10	0	1	2	SLC27A4, URM1	24544, -6215	downstream, upstream
hESC	1983	9	128656650	128657188	538	128656864	117	71.7647	17	1	1	3	WDR34, LOC105376287, HMGA1P4	-14, 28913, 6714	upstream, downstream, downstream
hESC	1984	9	128887922	128888295	373	128888096	77	52.25	12	0	1	2	CCBL1, LRRC8A	-5583, 5984	upstream, in gene
hESC	1985	9	128947504	128947719	215	128947605	24	22.4286	7	1	2	3	PHYHD1, DOLK, NUP188	26710, 128, -88	downstream, in gene, upstream
hESC	1986	9	129557433	129557754	321	129557568	38	29.5	10	0	0	0
hESC	1987	9	129824045	129824349	304	129824192	65	50.2222	9	1	1	2	TOR1A, C9orf78	53, 11101	in gene, downstream
hESC	1988	9	133336037	133336420	383	133336288	27	21.1667	12	1	1	2	SURF6, MED22	-78, 11868	upstream, downstream
hESC	1989	9	134975363	134975569	206	134975456	30	27.3333	6	0	0	0
hESC	1990	X	2931680	2931887	207	2931712	29	24.4286	7	0	1	2	ARSD, ARSE	-2337, 36598	upstream, downstream
hESC	1991	X	3702150	3702352	202	3702224	16	14	6	0	0	1	PRKX	11420	in gene
hESC	1992	X	5242403	5242786	383	5242576	30	22.9167	12	0	0	0
hESC	1993	X	6279414	6279677	263	6279520	50	42.125	8	0	0	0
hESC	1994	X	8688741	8689224	483	8689056	54	38.4	15	0	0	1	ANOS1	43130	in gene
hESC	1995	X	9293098	9293402	304	9293248	33	27	9	0	0	0
hESC	1996	X	10508879	10509247	368	10509056	40	29.8182	11	0	0	1	MID1	602121	in gene
hESC	1997	X	11566180	11566490	310	11566352	30	23.1111	9	0	0	1	ARHGAP6	99349	in gene
hESC	1998	X	12771494	12771737	243	12771616	30	24.8571	7	0	0	0
[truncated: 24,793 more rows]
