# Supplementary material for: Early anteroposterior regionalisation of human neural crest is shaped by a pro-mesodermal factor
Source: eLife. 2022 Sep 26;11:e74263. doi: 10.7554/eLife.74263 (PMC9536837; doi:10.7554/eLife.74263)
Supplement: Supplementary file 4. [file elife-74263-supp4.xlsx]

## Sheet: enrichedGO.tsv
	go.id	go.term	Definition	Ontology	pvalue	count.InDataset	count.InGenome	totaltermInDataset	totaltermInGenome	BH.adjusted.p.value	EntrezID	gene.name
bp.1	GO:0000075	cell cycle checkpoint	A cell cycle process that controls cell cycle progression by monitoring the integrity of specific cell cycle events. A cell cycle checkpoint begins with detection of deficiencies or defects and ends with signal transduction.	BP	6.04301e-05	43	219	170688	1602382	0.0076431	56658	TRIM39
bp.2	GO:0000075	cell cycle checkpoint	A cell cycle process that controls cell cycle progression by monitoring the integrity of specific cell cycle events. A cell cycle checkpoint begins with detection of deficiencies or defects and ends with signal transduction.	BP	6.04301e-05	43	219	170688	1602382	0.0076431	1063	CENPF
bp.3	GO:0000075	cell cycle checkpoint	A cell cycle process that controls cell cycle progression by monitoring the integrity of specific cell cycle events. A cell cycle checkpoint begins with detection of deficiencies or defects and ends with signal transduction.	BP	6.04301e-05	43	219	170688	1602382	0.0076431	29997	GLTSCR2
bp.4	GO:0000075	cell cycle checkpoint	A cell cycle process that controls cell cycle progression by monitoring the integrity of specific cell cycle events. A cell cycle checkpoint begins with detection of deficiencies or defects and ends with signal transduction.	BP	6.04301e-05	43	219	170688	1602382	0.0076431	9184	BUB3
bp.5	GO:0000075	cell cycle checkpoint	A cell cycle process that controls cell cycle progression by monitoring the integrity of specific cell cycle events. A cell cycle checkpoint begins with detection of deficiencies or defects and ends with signal transduction.	BP	6.04301e-05	43	219	170688	1602382	0.0076431	835	CASP2
bp.6	GO:0000075	cell cycle checkpoint	A cell cycle process that controls cell cycle progression by monitoring the integrity of specific cell cycle events. A cell cycle checkpoint begins with detection of deficiencies or defects and ends with signal transduction.	BP	6.04301e-05	43	219	170688	1602382	0.0076431	891	CCNB1
bp.7	GO:0000075	cell cycle checkpoint	A cell cycle process that controls cell cycle progression by monitoring the integrity of specific cell cycle events. A cell cycle checkpoint begins with detection of deficiencies or defects and ends with signal transduction.	BP	6.04301e-05	43	219	170688	1602382	0.0076431	4998	ORC1
bp.8	GO:0000075	cell cycle checkpoint	A cell cycle process that controls cell cycle progression by monitoring the integrity of specific cell cycle events. A cell cycle checkpoint begins with detection of deficiencies or defects and ends with signal transduction.	BP	6.04301e-05	43	219	170688	1602382	0.0076431	6154	RPL26
bp.9	GO:0000075	cell cycle checkpoint	A cell cycle process that controls cell cycle progression by monitoring the integrity of specific cell cycle events. A cell cycle checkpoint begins with detection of deficiencies or defects and ends with signal transduction.	BP	6.04301e-05	43	219	170688	1602382	0.0076431	6118	RPA2
bp.10	GO:0000075	cell cycle checkpoint	A cell cycle process that controls cell cycle progression by monitoring the integrity of specific cell cycle events. A cell cycle checkpoint begins with detection of deficiencies or defects and ends with signal transduction.	BP	6.04301e-05	43	219	170688	1602382	0.0076431	8738	CRADD
bp.11	GO:0000075	cell cycle checkpoint	A cell cycle process that controls cell cycle progression by monitoring the integrity of specific cell cycle events. A cell cycle checkpoint begins with detection of deficiencies or defects and ends with signal transduction.	BP	6.04301e-05	43	219	170688	1602382	0.0076431	57805	CCAR2
bp.12	GO:0000075	cell cycle checkpoint	A cell cycle process that controls cell cycle progression by monitoring the integrity of specific cell cycle events. A cell cycle checkpoint begins with detection of deficiencies or defects and ends with signal transduction.	BP	6.04301e-05	43	219	170688	1602382	0.0076431	64859	NABP1
bp.13	GO:0000075	cell cycle checkpoint	A cell cycle process that controls cell cycle progression by monitoring the integrity of specific cell cycle events. A cell cycle checkpoint begins with detection of deficiencies or defects and ends with signal transduction.	BP	6.04301e-05	43	219	170688	1602382	0.0076431	146956	EME1
bp.14	GO:0000075	cell cycle checkpoint	A cell cycle process that controls cell cycle progression by monitoring the integrity of specific cell cycle events. A cell cycle checkpoint begins with detection of deficiencies or defects and ends with signal transduction.	BP	6.04301e-05	43	219	170688	1602382	0.0076431	55055	ZWILCH
bp.15	GO:0000075	cell cycle checkpoint	A cell cycle process that controls cell cycle progression by monitoring the integrity of specific cell cycle events. A cell cycle checkpoint begins with detection of deficiencies or defects and ends with signal transduction.	BP	6.04301e-05	43	219	170688	1602382	0.0076431	699	BUB1
bp.16	GO:0000075	cell cycle checkpoint	A cell cycle process that controls cell cycle progression by monitoring the integrity of specific cell cycle events. A cell cycle checkpoint begins with detection of deficiencies or defects and ends with signal transduction.	BP	6.04301e-05	43	219	170688	1602382	0.0076431	8091	HMGA2
bp.17	GO:0000075	cell cycle checkpoint	A cell cycle process that controls cell cycle progression by monitoring the integrity of specific cell cycle events. A cell cycle checkpoint begins with detection of deficiencies or defects and ends with signal transduction.	BP	6.04301e-05	43	219	170688	1602382	0.0076431	51343	FZR1
bp.18	GO:0000075	cell cycle checkpoint	A cell cycle process that controls cell cycle progression by monitoring the integrity of specific cell cycle events. A cell cycle checkpoint begins with detection of deficiencies or defects and ends with signal transduction.	BP	6.04301e-05	43	219	170688	1602382	0.0076431	65975	STK33
bp.19	GO:0000075	cell cycle checkpoint	A cell cycle process that controls cell cycle progression by monitoring the integrity of specific cell cycle events. A cell cycle checkpoint begins with detection of deficiencies or defects and ends with signal transduction.	BP	6.04301e-05	43	219	170688	1602382	0.0076431	55571	CNOT11
bp.20	GO:0000075	cell cycle checkpoint	A cell cycle process that controls cell cycle progression by monitoring the integrity of specific cell cycle events. A cell cycle checkpoint begins with detection of deficiencies or defects and ends with signal transduction.	BP	6.04301e-05	43	219	170688	1602382	0.0076431	7029	TFDP2
bp.21	GO:0000075	cell cycle checkpoint	A cell cycle process that controls cell cycle progression by monitoring the integrity of specific cell cycle events. A cell cycle checkpoint begins with detection of deficiencies or defects and ends with signal transduction.	BP	6.04301e-05	43	219	170688	1602382	0.0076431	57060	PCBP4
bp.22	GO:0000075	cell cycle checkpoint	A cell cycle process that controls cell cycle progression by monitoring the integrity of specific cell cycle events. A cell cycle checkpoint begins with detection of deficiencies or defects and ends with signal transduction.	BP	6.04301e-05	43	219	170688	1602382	0.0076431	79791	FBXO31
bp.23	GO:0000075	cell cycle checkpoint	A cell cycle process that controls cell cycle progression by monitoring the integrity of specific cell cycle events. A cell cycle checkpoint begins with detection of deficiencies or defects and ends with signal transduction.	BP	6.04301e-05	43	219	170688	1602382	0.0076431	9183	ZW10
bp.24	GO:0000075	cell cycle checkpoint	A cell cycle process that controls cell cycle progression by monitoring the integrity of specific cell cycle events. A cell cycle checkpoint begins with detection of deficiencies or defects and ends with signal transduction.	BP	6.04301e-05	43	219	170688	1602382	0.0076431	9344	TAOK2
bp.25	GO:0000075	cell cycle checkpoint	A cell cycle process that controls cell cycle progression by monitoring the integrity of specific cell cycle events. A cell cycle checkpoint begins with detection of deficiencies or defects and ends with signal transduction.	BP	6.04301e-05	43	219	170688	1602382	0.0076431	10116	FEM1B
bp.26	GO:0000075	cell cycle checkpoint	A cell cycle process that controls cell cycle progression by monitoring the integrity of specific cell cycle events. A cell cycle checkpoint begins with detection of deficiencies or defects and ends with signal transduction.	BP	6.04301e-05	43	219	170688	1602382	0.0076431	57472	CNOT6
bp.27	GO:0000075	cell cycle checkpoint	A cell cycle process that controls cell cycle progression by monitoring the integrity of specific cell cycle events. A cell cycle checkpoint begins with detection of deficiencies or defects and ends with signal transduction.	BP	6.04301e-05	43	219	170688	1602382	0.0076431	9735	KNTC1
bp.28	GO:0000075	cell cycle checkpoint	A cell cycle process that controls cell cycle progression by monitoring the integrity of specific cell cycle events. A cell cycle checkpoint begins with detection of deficiencies or defects and ends with signal transduction.	BP	6.04301e-05	43	219	170688	1602382	0.0076431	144455	E2F7
bp.29	GO:0000075	cell cycle checkpoint	A cell cycle process that controls cell cycle progression by monitoring the integrity of specific cell cycle events. A cell cycle checkpoint begins with detection of deficiencies or defects and ends with signal transduction.	BP	6.04301e-05	43	219	170688	1602382	0.0076431	4193	MDM2
bp.30	GO:0000075	cell cycle checkpoint	A cell cycle process that controls cell cycle progression by monitoring the integrity of specific cell cycle events. A cell cycle checkpoint begins with detection of deficiencies or defects and ends with signal transduction.	BP	6.04301e-05	43	219	170688	1602382	0.0076431	84446	BRSK1
bp.31	GO:0000075	cell cycle checkpoint	A cell cycle process that controls cell cycle progression by monitoring the integrity of specific cell cycle events. A cell cycle checkpoint begins with detection of deficiencies or defects and ends with signal transduction.	BP	6.04301e-05	43	219	170688	1602382	0.0076431	25946	ZNF385A
bp.32	GO:0000075	cell cycle checkpoint	A cell cycle process that controls cell cycle progression by monitoring the integrity of specific cell cycle events. A cell cycle checkpoint begins with detection of deficiencies or defects and ends with signal transduction.	BP	6.04301e-05	43	219	170688	1602382	0.0076431	6790	AURKA
bp.33	GO:0000075	cell cycle checkpoint	A cell cycle process that controls cell cycle progression by monitoring the integrity of specific cell cycle events. A cell cycle checkpoint begins with detection of deficiencies or defects and ends with signal transduction.	BP	6.04301e-05	43	219	170688	1602382	0.0076431	7157	TP53
bp.34	GO:0000075	cell cycle checkpoint	A cell cycle process that controls cell cycle progression by monitoring the integrity of specific cell cycle events. A cell cycle checkpoint begins with detection of deficiencies or defects and ends with signal transduction.	BP	6.04301e-05	43	219	170688	1602382	0.0076431	545	ATR
bp.35	GO:0000075	cell cycle checkpoint	A cell cycle process that controls cell cycle progression by monitoring the integrity of specific cell cycle events. A cell cycle checkpoint begins with detection of deficiencies or defects and ends with signal transduction.	BP	6.04301e-05	43	219	170688	1602382	0.0076431	7465	WEE1
bp.36	GO:0000075	cell cycle checkpoint	A cell cycle process that controls cell cycle progression by monitoring the integrity of specific cell cycle events. A cell cycle checkpoint begins with detection of deficiencies or defects and ends with signal transduction.	BP	6.04301e-05	43	219	170688	1602382	0.0076431	91603	ZNF830
bp.37	GO:0000075	cell cycle checkpoint	A cell cycle process that controls cell cycle progression by monitoring the integrity of specific cell cycle events. A cell cycle checkpoint begins with detection of deficiencies or defects and ends with signal transduction.	BP	6.04301e-05	43	219	170688	1602382	0.0076431	581	BAX
bp.38	GO:0000075	cell cycle checkpoint	A cell cycle process that controls cell cycle progression by monitoring the integrity of specific cell cycle events. A cell cycle checkpoint begins with detection of deficiencies or defects and ends with signal transduction.	BP	6.04301e-05	43	219	170688	1602382	0.0076431	348654	GEN1
bp.39	GO:0000075	cell cycle checkpoint	A cell cycle process that controls cell cycle progression by monitoring the integrity of specific cell cycle events. A cell cycle checkpoint begins with detection of deficiencies or defects and ends with signal transduction.	BP	6.04301e-05	43	219	170688	1602382	0.0076431	5591	PRKDC
bp.40	GO:0000075	cell cycle checkpoint	A cell cycle process that controls cell cycle progression by monitoring the integrity of specific cell cycle events. A cell cycle checkpoint begins with detection of deficiencies or defects and ends with signal transduction.	BP	6.04301e-05	43	219	170688	1602382	0.0076431	1820	ARID3A
bp.41	GO:0000075	cell cycle checkpoint	A cell cycle process that controls cell cycle progression by monitoring the integrity of specific cell cycle events. A cell cycle checkpoint begins with detection of deficiencies or defects and ends with signal transduction.	BP	6.04301e-05	43	219	170688	1602382	0.0076431	23019	CNOT1
bp.42	GO:0000075	cell cycle checkpoint	A cell cycle process that controls cell cycle progression by monitoring the integrity of specific cell cycle events. A cell cycle checkpoint begins with detection of deficiencies or defects and ends with signal transduction.	BP	6.04301e-05	43	219	170688	1602382	0.0076431	3364	HUS1
bp.43	GO:0000075	cell cycle checkpoint	A cell cycle process that controls cell cycle progression by monitoring the integrity of specific cell cycle events. A cell cycle checkpoint begins with detection of deficiencies or defects and ends with signal transduction.	BP	6.04301e-05	43	219	170688	1602382	0.0076431	55755	CDK5RAP2
bp.44	GO:0000278	mitotic cell cycle	Progression through the phases of the mitotic cell cycle, the most common eukaryotic cell cycle, which canonically comprises four successive phases called G1, S, G2, and M and includes replication of the genome and the subsequent segregation of chromosomes into daughter cells. In some variant cell cycles nuclear replication or nuclear division may not be followed by cell division, or G1 and G2 ph…	BP	3.51529e-06	160	1053	170688	1602382	0.000871597	5692	PSMB4
bp.45	GO:0000278	mitotic cell cycle	Progression through the phases of the mitotic cell cycle, the most common eukaryotic cell cycle, which canonically comprises four successive phases called G1, S, G2, and M and includes replication of the genome and the subsequent segregation of chromosomes into daughter cells. In some variant cell cycles nuclear replication or nuclear division may not be followed by cell division, or G1 and G2 ph…	BP	3.51529e-06	160	1053	170688	1602382	0.000871597	6240	RRM1
bp.46	GO:0000278	mitotic cell cycle	Progression through the phases of the mitotic cell cycle, the most common eukaryotic cell cycle, which canonically comprises four successive phases called G1, S, G2, and M and includes replication of the genome and the subsequent segregation of chromosomes into daughter cells. In some variant cell cycles nuclear replication or nuclear division may not be followed by cell division, or G1 and G2 ph…	BP	3.51529e-06	160	1053	170688	1602382	0.000871597	10269	ZMPSTE24
bp.47	GO:0000278	mitotic cell cycle	Progression through the phases of the mitotic cell cycle, the most common eukaryotic cell cycle, which canonically comprises four successive phases called G1, S, G2, and M and includes replication of the genome and the subsequent segregation of chromosomes into daughter cells. In some variant cell cycles nuclear replication or nuclear division may not be followed by cell division, or G1 and G2 ph…	BP	3.51529e-06	160	1053	170688	1602382	0.000871597	10735	STAG2
bp.48	GO:0000278	mitotic cell cycle	Progression through the phases of the mitotic cell cycle, the most common eukaryotic cell cycle, which canonically comprises four successive phases called G1, S, G2, and M and includes replication of the genome and the subsequent segregation of chromosomes into daughter cells. In some variant cell cycles nuclear replication or nuclear division may not be followed by cell division, or G1 and G2 ph…	BP	3.51529e-06	160	1053	170688	1602382	0.000871597	144455	E2F7
bp.49	GO:0000278	mitotic cell cycle	Progression through the phases of the mitotic cell cycle, the most common eukaryotic cell cycle, which canonically comprises four successive phases called G1, S, G2, and M and includes replication of the genome and the subsequent segregation of chromosomes into daughter cells. In some variant cell cycles nuclear replication or nuclear division may not be followed by cell division, or G1 and G2 ph…	BP	3.51529e-06	160	1053	170688	1602382	0.000871597	10426	TUBGCP3
bp.50	GO:0000278	mitotic cell cycle	Progression through the phases of the mitotic cell cycle, the most common eukaryotic cell cycle, which canonically comprises four successive phases called G1, S, G2, and M and includes replication of the genome and the subsequent segregation of chromosomes into daughter cells. In some variant cell cycles nuclear replication or nuclear division may not be followed by cell division, or G1 and G2 ph…	BP	3.51529e-06	160	1053	170688	1602382	0.000871597	4762	NEUROG1
bp.51	GO:0000278	mitotic cell cycle	Progression through the phases of the mitotic cell cycle, the most common eukaryotic cell cycle, which canonically comprises four successive phases called G1, S, G2, and M and includes replication of the genome and the subsequent segregation of chromosomes into daughter cells. In some variant cell cycles nuclear replication or nuclear division may not be followed by cell division, or G1 and G2 ph…	BP	3.51529e-06	160	1053	170688	1602382	0.000871597	23063	WAPL
bp.52	GO:0000278	mitotic cell cycle	Progression through the phases of the mitotic cell cycle, the most common eukaryotic cell cycle, which canonically comprises four successive phases called G1, S, G2, and M and includes replication of the genome and the subsequent segregation of chromosomes into daughter cells. In some variant cell cycles nuclear replication or nuclear division may not be followed by cell division, or G1 and G2 ph…	BP	3.51529e-06	160	1053	170688	1602382	0.000871597	10121	ACTR1A
bp.53	GO:0000278	mitotic cell cycle	Progression through the phases of the mitotic cell cycle, the most common eukaryotic cell cycle, which canonically comprises four successive phases called G1, S, G2, and M and includes replication of the genome and the subsequent segregation of chromosomes into daughter cells. In some variant cell cycles nuclear replication or nuclear division may not be followed by cell division, or G1 and G2 ph…	BP	3.51529e-06	160	1053	170688	1602382	0.000871597	80124	VCPIP1
bp.54	GO:0000278	mitotic cell cycle	Progression through the phases of the mitotic cell cycle, the most common eukaryotic cell cycle, which canonically comprises four successive phases called G1, S, G2, and M and includes replication of the genome and the subsequent segregation of chromosomes into daughter cells. In some variant cell cycles nuclear replication or nuclear division may not be followed by cell division, or G1 and G2 ph…	BP	3.51529e-06	160	1053	170688	1602382	0.000871597	55193	PBRM1
bp.55	GO:0000278	mitotic cell cycle	Progression through the phases of the mitotic cell cycle, the most common eukaryotic cell cycle, which canonically comprises four successive phases called G1, S, G2, and M and includes replication of the genome and the subsequent segregation of chromosomes into daughter cells. In some variant cell cycles nuclear replication or nuclear division may not be followed by cell division, or G1 and G2 ph…	BP	3.51529e-06	160	1053	170688	1602382	0.000871597	341019	DCDC1
bp.56	GO:0000278	mitotic cell cycle	Progression through the phases of the mitotic cell cycle, the most common eukaryotic cell cycle, which canonically comprises four successive phases called G1, S, G2, and M and includes replication of the genome and the subsequent segregation of chromosomes into daughter cells. In some variant cell cycles nuclear replication or nuclear division may not be followed by cell division, or G1 and G2 ph…	BP	3.51529e-06	160	1053	170688	1602382	0.000871597	128866	CHMP4B
bp.57	GO:0000278	mitotic cell cycle	Progression through the phases of the mitotic cell cycle, the most common eukaryotic cell cycle, which canonically comprises four successive phases called G1, S, G2, and M and includes replication of the genome and the subsequent segregation of chromosomes into daughter cells. In some variant cell cycles nuclear replication or nuclear division may not be followed by cell division, or G1 and G2 ph…	BP	3.51529e-06	160	1053	170688	1602382	0.000871597	9735	KNTC1
bp.58	GO:0000278	mitotic cell cycle	Progression through the phases of the mitotic cell cycle, the most common eukaryotic cell cycle, which canonically comprises four successive phases called G1, S, G2, and M and includes replication of the genome and the subsequent segregation of chromosomes into daughter cells. In some variant cell cycles nuclear replication or nuclear division may not be followed by cell division, or G1 and G2 ph…	BP	3.51529e-06	160	1053	170688	1602382	0.000871597	5426	POLE
bp.59	GO:0000278	mitotic cell cycle	Progression through the phases of the mitotic cell cycle, the most common eukaryotic cell cycle, which canonically comprises four successive phases called G1, S, G2, and M and includes replication of the genome and the subsequent segregation of chromosomes into daughter cells. In some variant cell cycles nuclear replication or nuclear division may not be followed by cell division, or G1 and G2 ph…	BP	3.51529e-06	160	1053	170688	1602382	0.000871597	23503	ZFYVE26
bp.60	GO:0000278	mitotic cell cycle	Progression through the phases of the mitotic cell cycle, the most common eukaryotic cell cycle, which canonically comprises four successive phases called G1, S, G2, and M and includes replication of the genome and the subsequent segregation of chromosomes into daughter cells. In some variant cell cycles nuclear replication or nuclear division may not be followed by cell division, or G1 and G2 ph…	BP	3.51529e-06	160	1053	170688	1602382	0.000871597	678	ZFP36L2
bp.61	GO:0000278	mitotic cell cycle	Progression through the phases of the mitotic cell cycle, the most common eukaryotic cell cycle, which canonically comprises four successive phases called G1, S, G2, and M and includes replication of the genome and the subsequent segregation of chromosomes into daughter cells. In some variant cell cycles nuclear replication or nuclear division may not be followed by cell division, or G1 and G2 ph…	BP	3.51529e-06	160	1053	170688	1602382	0.000871597	131601	TPRA1
bp.62	GO:0000278	mitotic cell cycle	Progression through the phases of the mitotic cell cycle, the most common eukaryotic cell cycle, which canonically comprises four successive phases called G1, S, G2, and M and includes replication of the genome and the subsequent segregation of chromosomes into daughter cells. In some variant cell cycles nuclear replication or nuclear division may not be followed by cell division, or G1 and G2 ph…	BP	3.51529e-06	160	1053	170688	1602382	0.000871597	6711	SPTBN1
bp.63	GO:0000278	mitotic cell cycle	Progression through the phases of the mitotic cell cycle, the most common eukaryotic cell cycle, which canonically comprises four successive phases called G1, S, G2, and M and includes replication of the genome and the subsequent segregation of chromosomes into daughter cells. In some variant cell cycles nuclear replication or nuclear division may not be followed by cell division, or G1 and G2 ph…	BP	3.51529e-06	160	1053	170688	1602382	0.000871597	51507	RTFDC1
bp.64	GO:0000278	mitotic cell cycle	Progression through the phases of the mitotic cell cycle, the most common eukaryotic cell cycle, which canonically comprises four successive phases called G1, S, G2, and M and includes replication of the genome and the subsequent segregation of chromosomes into daughter cells. In some variant cell cycles nuclear replication or nuclear division may not be followed by cell division, or G1 and G2 ph…	BP	3.51529e-06	160	1053	170688	1602382	0.000871597	2260	FGFR1
bp.65	GO:0000278	mitotic cell cycle	Progression through the phases of the mitotic cell cycle, the most common eukaryotic cell cycle, which canonically comprises four successive phases called G1, S, G2, and M and includes replication of the genome and the subsequent segregation of chromosomes into daughter cells. In some variant cell cycles nuclear replication or nuclear division may not be followed by cell division, or G1 and G2 ph…	BP	3.51529e-06	160	1053	170688	1602382	0.000871597	83903	GSG2
bp.66	GO:0000278	mitotic cell cycle	Progression through the phases of the mitotic cell cycle, the most common eukaryotic cell cycle, which canonically comprises four successive phases called G1, S, G2, and M and includes replication of the genome and the subsequent segregation of chromosomes into daughter cells. In some variant cell cycles nuclear replication or nuclear division may not be followed by cell division, or G1 and G2 ph…	BP	3.51529e-06	160	1053	170688	1602382	0.000871597	6502	SKP2
bp.67	GO:0000278	mitotic cell cycle	Progression through the phases of the mitotic cell cycle, the most common eukaryotic cell cycle, which canonically comprises four successive phases called G1, S, G2, and M and includes replication of the genome and the subsequent segregation of chromosomes into daughter cells. In some variant cell cycles nuclear replication or nuclear division may not be followed by cell division, or G1 and G2 ph…	BP	3.51529e-06	160	1053	170688	1602382	0.000871597	79960	JADE1
bp.68	GO:0000278	mitotic cell cycle	Progression through the phases of the mitotic cell cycle, the most common eukaryotic cell cycle, which canonically comprises four successive phases called G1, S, G2, and M and includes replication of the genome and the subsequent segregation of chromosomes into daughter cells. In some variant cell cycles nuclear replication or nuclear division may not be followed by cell division, or G1 and G2 ph…	BP	3.51529e-06	160	1053	170688	1602382	0.000871597	55165	CEP55
bp.69	GO:0000278	mitotic cell cycle	Progression through the phases of the mitotic cell cycle, the most common eukaryotic cell cycle, which canonically comprises four successive phases called G1, S, G2, and M and includes replication of the genome and the subsequent segregation of chromosomes into daughter cells. In some variant cell cycles nuclear replication or nuclear division may not be followed by cell division, or G1 and G2 ph…	BP	3.51529e-06	160	1053	170688	1602382	0.000871597	54107	POLE3
bp.70	GO:0000278	mitotic cell cycle	Progression through the phases of the mitotic cell cycle, the most common eukaryotic cell cycle, which canonically comprises four successive phases called G1, S, G2, and M and includes replication of the genome and the subsequent segregation of chromosomes into daughter cells. In some variant cell cycles nuclear replication or nuclear division may not be followed by cell division, or G1 and G2 ph…	BP	3.51529e-06	160	1053	170688	1602382	0.000871597	55055	ZWILCH
bp.71	GO:0000278	mitotic cell cycle	Progression through the phases of the mitotic cell cycle, the most common eukaryotic cell cycle, which canonically comprises four successive phases called G1, S, G2, and M and includes replication of the genome and the subsequent segregation of chromosomes into daughter cells. In some variant cell cycles nuclear replication or nuclear division may not be followed by cell division, or G1 and G2 ph…	BP	3.51529e-06	160	1053	170688	1602382	0.000871597	8929	PHOX2B
bp.72	GO:0000278	mitotic cell cycle	Progression through the phases of the mitotic cell cycle, the most common eukaryotic cell cycle, which canonically comprises four successive phases called G1, S, G2, and M and includes replication of the genome and the subsequent segregation of chromosomes into daughter cells. In some variant cell cycles nuclear replication or nuclear division may not be followed by cell division, or G1 and G2 ph…	BP	3.51529e-06	160	1053	170688	1602382	0.000871597	6118	RPA2
bp.73	GO:0000278	mitotic cell cycle	Progression through the phases of the mitotic cell cycle, the most common eukaryotic cell cycle, which canonically comprises four successive phases called G1, S, G2, and M and includes replication of the genome and the subsequent segregation of chromosomes into daughter cells. In some variant cell cycles nuclear replication or nuclear division may not be followed by cell division, or G1 and G2 ph…	BP	3.51529e-06	160	1053	170688	1602382	0.000871597	10039	PARP3
bp.74	GO:0000278	mitotic cell cycle	Progression through the phases of the mitotic cell cycle, the most common eukaryotic cell cycle, which canonically comprises four successive phases called G1, S, G2, and M and includes replication of the genome and the subsequent segregation of chromosomes into daughter cells. In some variant cell cycles nuclear replication or nuclear division may not be followed by cell division, or G1 and G2 ph…	BP	3.51529e-06	160	1053	170688	1602382	0.000871597	375	ARF1
bp.75	GO:0000278	mitotic cell cycle	Progression through the phases of the mitotic cell cycle, the most common eukaryotic cell cycle, which canonically comprises four successive phases called G1, S, G2, and M and includes replication of the genome and the subsequent segregation of chromosomes into daughter cells. In some variant cell cycles nuclear replication or nuclear division may not be followed by cell division, or G1 and G2 ph…	BP	3.51529e-06	160	1053	170688	1602382	0.000871597	6347	CCL2
bp.76	GO:0000278	mitotic cell cycle	Progression through the phases of the mitotic cell cycle, the most common eukaryotic cell cycle, which canonically comprises four successive phases called G1, S, G2, and M and includes replication of the genome and the subsequent segregation of chromosomes into daughter cells. In some variant cell cycles nuclear replication or nuclear division may not be followed by cell division, or G1 and G2 ph…	BP	3.51529e-06	160	1053	170688	1602382	0.000871597	348654	GEN1
bp.77	GO:0000278	mitotic cell cycle	Progression through the phases of the mitotic cell cycle, the most common eukaryotic cell cycle, which canonically comprises four successive phases called G1, S, G2, and M and includes replication of the genome and the subsequent segregation of chromosomes into daughter cells. In some variant cell cycles nuclear replication or nuclear division may not be followed by cell division, or G1 and G2 ph…	BP	3.51529e-06	160	1053	170688	1602382	0.000871597	9150	CTDP1
bp.78	GO:0000278	mitotic cell cycle	Progression through the phases of the mitotic cell cycle, the most common eukaryotic cell cycle, which canonically comprises four successive phases called G1, S, G2, and M and includes replication of the genome and the subsequent segregation of chromosomes into daughter cells. In some variant cell cycles nuclear replication or nuclear division may not be followed by cell division, or G1 and G2 ph…	BP	3.51529e-06	160	1053	170688	1602382	0.000871597	699	BUB1
bp.79	GO:0000278	mitotic cell cycle	Progression through the phases of the mitotic cell cycle, the most common eukaryotic cell cycle, which canonically comprises four successive phases called G1, S, G2, and M and includes replication of the genome and the subsequent segregation of chromosomes into daughter cells. In some variant cell cycles nuclear replication or nuclear division may not be followed by cell division, or G1 and G2 ph…	BP	3.51529e-06	160	1053	170688	1602382	0.000871597	5695	PSMB7
bp.80	GO:0000278	mitotic cell cycle	Progression through the phases of the mitotic cell cycle, the most common eukaryotic cell cycle, which canonically comprises four successive phases called G1, S, G2, and M and includes replication of the genome and the subsequent segregation of chromosomes into daughter cells. In some variant cell cycles nuclear replication or nuclear division may not be followed by cell division, or G1 and G2 ph…	BP	3.51529e-06	160	1053	170688	1602382	0.000871597	10274	STAG1
bp.81	GO:0000278	mitotic cell cycle	Progression through the phases of the mitotic cell cycle, the most common eukaryotic cell cycle, which canonically comprises four successive phases called G1, S, G2, and M and includes replication of the genome and the subsequent segregation of chromosomes into daughter cells. In some variant cell cycles nuclear replication or nuclear division may not be followed by cell division, or G1 and G2 ph…	BP	3.51529e-06	160	1053	170688	1602382	0.000871597	58190	CTDSP1
bp.82	GO:0000278	mitotic cell cycle	Progression through the phases of the mitotic cell cycle, the most common eukaryotic cell cycle, which canonically comprises four successive phases called G1, S, G2, and M and includes replication of the genome and the subsequent segregation of chromosomes into daughter cells. In some variant cell cycles nuclear replication or nuclear division may not be followed by cell division, or G1 and G2 ph…	BP	3.51529e-06	160	1053	170688	1602382	0.000871597	55755	CDK5RAP2
bp.83	GO:0000278	mitotic cell cycle	Progression through the phases of the mitotic cell cycle, the most common eukaryotic cell cycle, which canonically comprises four successive phases called G1, S, G2, and M and includes replication of the genome and the subsequent segregation of chromosomes into daughter cells. In some variant cell cycles nuclear replication or nuclear division may not be followed by cell division, or G1 and G2 ph…	BP	3.51529e-06	160	1053	170688	1602382	0.000871597	11331	PHB2
bp.84	GO:0000278	mitotic cell cycle	Progression through the phases of the mitotic cell cycle, the most common eukaryotic cell cycle, which canonically comprises four successive phases called G1, S, G2, and M and includes replication of the genome and the subsequent segregation of chromosomes into daughter cells. In some variant cell cycles nuclear replication or nuclear division may not be followed by cell division, or G1 and G2 ph…	BP	3.51529e-06	160	1053	170688	1602382	0.000871597	1781	DYNC1I2
bp.85	GO:0000278	mitotic cell cycle	Progression through the phases of the mitotic cell cycle, the most common eukaryotic cell cycle, which canonically comprises four successive phases called G1, S, G2, and M and includes replication of the genome and the subsequent segregation of chromosomes into daughter cells. In some variant cell cycles nuclear replication or nuclear division may not be followed by cell division, or G1 and G2 ph…	BP	3.51529e-06	160	1053	170688	1602382	0.000871597	3280	HES1
bp.86	GO:0000278	mitotic cell cycle	Progression through the phases of the mitotic cell cycle, the most common eukaryotic cell cycle, which canonically comprises four successive phases called G1, S, G2, and M and includes replication of the genome and the subsequent segregation of chromosomes into daughter cells. In some variant cell cycles nuclear replication or nuclear division may not be followed by cell division, or G1 and G2 ph…	BP	3.51529e-06	160	1053	170688	1602382	0.000871597	5728	PTEN
bp.87	GO:0000278	mitotic cell cycle	Progression through the phases of the mitotic cell cycle, the most common eukaryotic cell cycle, which canonically comprises four successive phases called G1, S, G2, and M and includes replication of the genome and the subsequent segregation of chromosomes into daughter cells. In some variant cell cycles nuclear replication or nuclear division may not be followed by cell division, or G1 and G2 ph…	BP	3.51529e-06	160	1053	170688	1602382	0.000871597	10763	NES
bp.88	GO:0000278	mitotic cell cycle	Progression through the phases of the mitotic cell cycle, the most common eukaryotic cell cycle, which canonically comprises four successive phases called G1, S, G2, and M and includes replication of the genome and the subsequent segregation of chromosomes into daughter cells. In some variant cell cycles nuclear replication or nuclear division may not be followed by cell division, or G1 and G2 ph…	BP	3.51529e-06	160	1053	170688	1602382	0.000871597	5691	PSMB3
bp.89	GO:0000278	mitotic cell cycle	Progression through the phases of the mitotic cell cycle, the most common eukaryotic cell cycle, which canonically comprises four successive phases called G1, S, G2, and M and includes replication of the genome and the subsequent segregation of chromosomes into daughter cells. In some variant cell cycles nuclear replication or nuclear division may not be followed by cell division, or G1 and G2 ph…	BP	3.51529e-06	160	1053	170688	1602382	0.000871597	284403	WDR62
bp.90	GO:0000278	mitotic cell cycle	Progression through the phases of the mitotic cell cycle, the most common eukaryotic cell cycle, which canonically comprises four successive phases called G1, S, G2, and M and includes replication of the genome and the subsequent segregation of chromosomes into daughter cells. In some variant cell cycles nuclear replication or nuclear division may not be followed by cell division, or G1 and G2 ph…	BP	3.51529e-06	160	1053	170688	1602382	0.000871597	80218	NAA50
bp.91	GO:0000278	mitotic cell cycle	Progression through the phases of the mitotic cell cycle, the most common eukaryotic cell cycle, which canonically comprises four successive phases called G1, S, G2, and M and includes replication of the genome and the subsequent segregation of chromosomes into daughter cells. In some variant cell cycles nuclear replication or nuclear division may not be followed by cell division, or G1 and G2 ph…	BP	3.51529e-06	160	1053	170688	1602382	0.000871597	1063	CENPF
bp.92	GO:0000278	mitotic cell cycle	Progression through the phases of the mitotic cell cycle, the most common eukaryotic cell cycle, which canonically comprises four successive phases called G1, S, G2, and M and includes replication of the genome and the subsequent segregation of chromosomes into daughter cells. In some variant cell cycles nuclear replication or nuclear division may not be followed by cell division, or G1 and G2 ph…	BP	3.51529e-06	160	1053	170688	1602382	0.000871597	2255	FGF10
bp.93	GO:0000278	mitotic cell cycle	Progression through the phases of the mitotic cell cycle, the most common eukaryotic cell cycle, which canonically comprises four successive phases called G1, S, G2, and M and includes replication of the genome and the subsequent segregation of chromosomes into daughter cells. In some variant cell cycles nuclear replication or nuclear division may not be followed by cell division, or G1 and G2 ph…	BP	3.51529e-06	160	1053	170688	1602382	0.000871597	51343	FZR1
bp.94	GO:0000278	mitotic cell cycle	Progression through the phases of the mitotic cell cycle, the most common eukaryotic cell cycle, which canonically comprises four successive phases called G1, S, G2, and M and includes replication of the genome and the subsequent segregation of chromosomes into daughter cells. In some variant cell cycles nuclear replication or nuclear division may not be followed by cell division, or G1 and G2 ph…	BP	3.51529e-06	160	1053	170688	1602382	0.000871597	64859	NABP1
bp.95	GO:0000278	mitotic cell cycle	Progression through the phases of the mitotic cell cycle, the most common eukaryotic cell cycle, which canonically comprises four successive phases called G1, S, G2, and M and includes replication of the genome and the subsequent segregation of chromosomes into daughter cells. In some variant cell cycles nuclear replication or nuclear division may not be followed by cell division, or G1 and G2 ph…	BP	3.51529e-06	160	1053	170688	1602382	0.000871597	57695	USP37
bp.96	GO:0000278	mitotic cell cycle	Progression through the phases of the mitotic cell cycle, the most common eukaryotic cell cycle, which canonically comprises four successive phases called G1, S, G2, and M and includes replication of the genome and the subsequent segregation of chromosomes into daughter cells. In some variant cell cycles nuclear replication or nuclear division may not be followed by cell division, or G1 and G2 ph…	BP	3.51529e-06	160	1053	170688	1602382	0.000871597	84446	BRSK1
bp.97	GO:0000278	mitotic cell cycle	Progression through the phases of the mitotic cell cycle, the most common eukaryotic cell cycle, which canonically comprises four successive phases called G1, S, G2, and M and includes replication of the genome and the subsequent segregation of chromosomes into daughter cells. In some variant cell cycles nuclear replication or nuclear division may not be followed by cell division, or G1 and G2 ph…	BP	3.51529e-06	160	1053	170688	1602382	0.000871597	84930	MASTL
bp.98	GO:0000278	mitotic cell cycle	Progression through the phases of the mitotic cell cycle, the most common eukaryotic cell cycle, which canonically comprises four successive phases called G1, S, G2, and M and includes replication of the genome and the subsequent segregation of chromosomes into daughter cells. In some variant cell cycles nuclear replication or nuclear division may not be followed by cell division, or G1 and G2 ph…	BP	3.51529e-06	160	1053	170688	1602382	0.000871597	23019	CNOT1
bp.99	GO:0000278	mitotic cell cycle	Progression through the phases of the mitotic cell cycle, the most common eukaryotic cell cycle, which canonically comprises four successive phases called G1, S, G2, and M and includes replication of the genome and the subsequent segregation of chromosomes into daughter cells. In some variant cell cycles nuclear replication or nuclear division may not be followed by cell division, or G1 and G2 ph…	BP	3.51529e-06	160	1053	170688	1602382	0.000871597	5707	PSMD1
bp.100	GO:0000278	mitotic cell cycle	Progression through the phases of the mitotic cell cycle, the most common eukaryotic cell cycle, which canonically comprises four successive phases called G1, S, G2, and M and includes replication of the genome and the subsequent segregation of chromosomes into daughter cells. In some variant cell cycles nuclear replication or nuclear division may not be followed by cell division, or G1 and G2 ph…	BP	3.51529e-06	160	1053	170688	1602382	0.000871597	5591	PRKDC
bp.101	GO:0000278	mitotic cell cycle	Progression through the phases of the mitotic cell cycle, the most common eukaryotic cell cycle, which canonically comprises four successive phases called G1, S, G2, and M and includes replication of the genome and the subsequent segregation of chromosomes into daughter cells. In some variant cell cycles nuclear replication or nuclear division may not be followed by cell division, or G1 and G2 ph…	BP	3.51529e-06	160	1053	170688	1602382	0.000871597	5686	PSMA5
bp.102	GO:0000278	mitotic cell cycle	Progression through the phases of the mitotic cell cycle, the most common eukaryotic cell cycle, which canonically comprises four successive phases called G1, S, G2, and M and includes replication of the genome and the subsequent segregation of chromosomes into daughter cells. In some variant cell cycles nuclear replication or nuclear division may not be followed by cell division, or G1 and G2 ph…	BP	3.51529e-06	160	1053	170688	1602382	0.000871597	9555	H2AFY
bp.103	GO:0000278	mitotic cell cycle	Progression through the phases of the mitotic cell cycle, the most common eukaryotic cell cycle, which canonically comprises four successive phases called G1, S, G2, and M and includes replication of the genome and the subsequent segregation of chromosomes into daughter cells. In some variant cell cycles nuclear replication or nuclear division may not be followed by cell division, or G1 and G2 ph…	BP	3.51529e-06	160	1053	170688	1602382	0.000871597	984	CDK11B
bp.104	GO:0000278	mitotic cell cycle	Progression through the phases of the mitotic cell cycle, the most common eukaryotic cell cycle, which canonically comprises four successive phases called G1, S, G2, and M and includes replication of the genome and the subsequent segregation of chromosomes into daughter cells. In some variant cell cycles nuclear replication or nuclear division may not be followed by cell division, or G1 and G2 ph…	BP	3.51529e-06	160	1053	170688	1602382	0.000871597	728642	CDK11A
bp.105	GO:0000278	mitotic cell cycle	Progression through the phases of the mitotic cell cycle, the most common eukaryotic cell cycle, which canonically comprises four successive phases called G1, S, G2, and M and includes replication of the genome and the subsequent segregation of chromosomes into daughter cells. In some variant cell cycles nuclear replication or nuclear division may not be followed by cell division, or G1 and G2 ph…	BP	3.51529e-06	160	1053	170688	1602382	0.000871597	677	ZFP36L1
bp.106	GO:0000278	mitotic cell cycle	Progression through the phases of the mitotic cell cycle, the most common eukaryotic cell cycle, which canonically comprises four successive phases called G1, S, G2, and M and includes replication of the genome and the subsequent segregation of chromosomes into daughter cells. In some variant cell cycles nuclear replication or nuclear division may not be followed by cell division, or G1 and G2 ph…	BP	3.51529e-06	160	1053	170688	1602382	0.000871597	7029	TFDP2
bp.107	GO:0000278	mitotic cell cycle	Progression through the phases of the mitotic cell cycle, the most common eukaryotic cell cycle, which canonically comprises four successive phases called G1, S, G2, and M and includes replication of the genome and the subsequent segregation of chromosomes into daughter cells. In some variant cell cycles nuclear replication or nuclear division may not be followed by cell division, or G1 and G2 ph…	BP	3.51529e-06	160	1053	170688	1602382	0.000871597	29882	ANAPC2
bp.108	GO:0000278	mitotic cell cycle	Progression through the phases of the mitotic cell cycle, the most common eukaryotic cell cycle, which canonically comprises four successive phases called G1, S, G2, and M and includes replication of the genome and the subsequent segregation of chromosomes into daughter cells. In some variant cell cycles nuclear replication or nuclear division may not be followed by cell division, or G1 and G2 ph…	BP	3.51529e-06	160	1053	170688	1602382	0.000871597	56257	MEPCE
bp.109	GO:0000278	mitotic cell cycle	Progression through the phases of the mitotic cell cycle, the most common eukaryotic cell cycle, which canonically comprises four successive phases called G1, S, G2, and M and includes replication of the genome and the subsequent segregation of chromosomes into daughter cells. In some variant cell cycles nuclear replication or nuclear division may not be followed by cell division, or G1 and G2 ph…	BP	3.51529e-06	160	1053	170688	1602382	0.000871597	3373	HYAL1
bp.110	GO:0000278	mitotic cell cycle	Progression through the phases of the mitotic cell cycle, the most common eukaryotic cell cycle, which canonically comprises four successive phases called G1, S, G2, and M and includes replication of the genome and the subsequent segregation of chromosomes into daughter cells. In some variant cell cycles nuclear replication or nuclear division may not be followed by cell division, or G1 and G2 ph…	BP	3.51529e-06	160	1053	170688	1602382	0.000871597	26057	ANKRD17
bp.111	GO:0000278	mitotic cell cycle	Progression through the phases of the mitotic cell cycle, the most common eukaryotic cell cycle, which canonically comprises four successive phases called G1, S, G2, and M and includes replication of the genome and the subsequent segregation of chromosomes into daughter cells. In some variant cell cycles nuclear replication or nuclear division may not be followed by cell division, or G1 and G2 ph…	BP	3.51529e-06	160	1053	170688	1602382	0.000871597	655	BMP7
bp.112	GO:0000278	mitotic cell cycle	Progression through the phases of the mitotic cell cycle, the most common eukaryotic cell cycle, which canonically comprises four successive phases called G1, S, G2, and M and includes replication of the genome and the subsequent segregation of chromosomes into daughter cells. In some variant cell cycles nuclear replication or nuclear division may not be followed by cell division, or G1 and G2 ph…	BP	3.51529e-06	160	1053	170688	1602382	0.000871597	123879	DCUN1D3
bp.113	GO:0000278	mitotic cell cycle	Progression through the phases of the mitotic cell cycle, the most common eukaryotic cell cycle, which canonically comprises four successive phases called G1, S, G2, and M and includes replication of the genome and the subsequent segregation of chromosomes into daughter cells. In some variant cell cycles nuclear replication or nuclear division may not be followed by cell division, or G1 and G2 ph…	BP	3.51529e-06	160	1053	170688	1602382	0.000871597	4212	MEIS2
bp.114	GO:0000278	mitotic cell cycle	Progression through the phases of the mitotic cell cycle, the most common eukaryotic cell cycle, which canonically comprises four successive phases called G1, S, G2, and M and includes replication of the genome and the subsequent segregation of chromosomes into daughter cells. In some variant cell cycles nuclear replication or nuclear division may not be followed by cell division, or G1 and G2 ph…	BP	3.51529e-06	160	1053	170688	1602382	0.000871597	113130	CDCA5
bp.115	GO:0000278	mitotic cell cycle	Progression through the phases of the mitotic cell cycle, the most common eukaryotic cell cycle, which canonically comprises four successive phases called G1, S, G2, and M and includes replication of the genome and the subsequent segregation of chromosomes into daughter cells. In some variant cell cycles nuclear replication or nuclear division may not be followed by cell division, or G1 and G2 ph…	BP	3.51529e-06	160	1053	170688	1602382	0.000871597	3398	ID2
bp.116	GO:0000278	mitotic cell cycle	Progression through the phases of the mitotic cell cycle, the most common eukaryotic cell cycle, which canonically comprises four successive phases called G1, S, G2, and M and includes replication of the genome and the subsequent segregation of chromosomes into daughter cells. In some variant cell cycles nuclear replication or nuclear division may not be followed by cell division, or G1 and G2 ph…	BP	3.51529e-06	160	1053	170688	1602382	0.000871597	25886	POC1A
bp.117	GO:0000278	mitotic cell cycle	Progression through the phases of the mitotic cell cycle, the most common eukaryotic cell cycle, which canonically comprises four successive phases called G1, S, G2, and M and includes replication of the genome and the subsequent segregation of chromosomes into daughter cells. In some variant cell cycles nuclear replication or nuclear division may not be followed by cell division, or G1 and G2 ph…	BP	3.51529e-06	160	1053	170688	1602382	0.000871597	5715	PSMD9
bp.118	GO:0000278	mitotic cell cycle	Progression through the phases of the mitotic cell cycle, the most common eukaryotic cell cycle, which canonically comprises four successive phases called G1, S, G2, and M and includes replication of the genome and the subsequent segregation of chromosomes into daughter cells. In some variant cell cycles nuclear replication or nuclear division may not be followed by cell division, or G1 and G2 ph…	BP	3.51529e-06	160	1053	170688	1602382	0.000871597	29997	GLTSCR2
bp.119	GO:0000278	mitotic cell cycle	Progression through the phases of the mitotic cell cycle, the most common eukaryotic cell cycle, which canonically comprises four successive phases called G1, S, G2, and M and includes replication of the genome and the subsequent segregation of chromosomes into daughter cells. In some variant cell cycles nuclear replication or nuclear division may not be followed by cell division, or G1 and G2 ph…	BP	3.51529e-06	160	1053	170688	1602382	0.000871597	8881	CDC16
bp.120	GO:0000278	mitotic cell cycle	Progression through the phases of the mitotic cell cycle, the most common eukaryotic cell cycle, which canonically comprises four successive phases called G1, S, G2, and M and includes replication of the genome and the subsequent segregation of chromosomes into daughter cells. In some variant cell cycles nuclear replication or nuclear division may not be followed by cell division, or G1 and G2 ph…	BP	3.51529e-06	160	1053	170688	1602382	0.000871597	9134	CCNE2
bp.121	GO:0000278	mitotic cell cycle	Progression through the phases of the mitotic cell cycle, the most common eukaryotic cell cycle, which canonically comprises four successive phases called G1, S, G2, and M and includes replication of the genome and the subsequent segregation of chromosomes into daughter cells. In some variant cell cycles nuclear replication or nuclear division may not be followed by cell division, or G1 and G2 ph…	BP	3.51529e-06	160	1053	170688	1602382	0.000871597	57060	PCBP4
bp.122	GO:0000278	mitotic cell cycle	Progression through the phases of the mitotic cell cycle, the most common eukaryotic cell cycle, which canonically comprises four successive phases called G1, S, G2, and M and includes replication of the genome and the subsequent segregation of chromosomes into daughter cells. In some variant cell cycles nuclear replication or nuclear division may not be followed by cell division, or G1 and G2 ph…	BP	3.51529e-06	160	1053	170688	1602382	0.000871597	148479	PHF13
bp.123	GO:0000278	mitotic cell cycle	Progression through the phases of the mitotic cell cycle, the most common eukaryotic cell cycle, which canonically comprises four successive phases called G1, S, G2, and M and includes replication of the genome and the subsequent segregation of chromosomes into daughter cells. In some variant cell cycles nuclear replication or nuclear division may not be followed by cell division, or G1 and G2 ph…	BP	3.51529e-06	160	1053	170688	1602382	0.000871597	64839	FBXL17
bp.124	GO:0000278	mitotic cell cycle	Progression through the phases of the mitotic cell cycle, the most common eukaryotic cell cycle, which canonically comprises four successive phases called G1, S, G2, and M and includes replication of the genome and the subsequent segregation of chromosomes into daughter cells. In some variant cell cycles nuclear replication or nuclear division may not be followed by cell division, or G1 and G2 ph…	BP	3.51529e-06	160	1053	170688	1602382	0.000871597	79791	FBXO31
bp.125	GO:0000278	mitotic cell cycle	Progression through the phases of the mitotic cell cycle, the most common eukaryotic cell cycle, which canonically comprises four successive phases called G1, S, G2, and M and includes replication of the genome and the subsequent segregation of chromosomes into daughter cells. In some variant cell cycles nuclear replication or nuclear division may not be followed by cell division, or G1 and G2 ph…	BP	3.51529e-06	160	1053	170688	1602382	0.000871597	1820	ARID3A
bp.126	GO:0000278	mitotic cell cycle	Progression through the phases of the mitotic cell cycle, the most common eukaryotic cell cycle, which canonically comprises four successive phases called G1, S, G2, and M and includes replication of the genome and the subsequent segregation of chromosomes into daughter cells. In some variant cell cycles nuclear replication or nuclear division may not be followed by cell division, or G1 and G2 ph…	BP	3.51529e-06	160	1053	170688	1602382	0.000871597	81853	TMEM14B
bp.127	GO:0000278	mitotic cell cycle	Progression through the phases of the mitotic cell cycle, the most common eukaryotic cell cycle, which canonically comprises four successive phases called G1, S, G2, and M and includes replication of the genome and the subsequent segregation of chromosomes into daughter cells. In some variant cell cycles nuclear replication or nuclear division may not be followed by cell division, or G1 and G2 ph…	BP	3.51529e-06	160	1053	170688	1602382	0.000871597	10106	CTDSP2
bp.128	GO:0000278	mitotic cell cycle	Progression through the phases of the mitotic cell cycle, the most common eukaryotic cell cycle, which canonically comprises four successive phases called G1, S, G2, and M and includes replication of the genome and the subsequent segregation of chromosomes into daughter cells. In some variant cell cycles nuclear replication or nuclear division may not be followed by cell division, or G1 and G2 ph…	BP	3.51529e-06	160	1053	170688	1602382	0.000871597	5714	PSMD8
bp.129	GO:0000278	mitotic cell cycle	Progression through the phases of the mitotic cell cycle, the most common eukaryotic cell cycle, which canonically comprises four successive phases called G1, S, G2, and M and includes replication of the genome and the subsequent segregation of chromosomes into daughter cells. In some variant cell cycles nuclear replication or nuclear division may not be followed by cell division, or G1 and G2 ph…	BP	3.51529e-06	160	1053	170688	1602382	0.000871597	64946	CENPH
bp.130	GO:0000278	mitotic cell cycle	Progression through the phases of the mitotic cell cycle, the most common eukaryotic cell cycle, which canonically comprises four successive phases called G1, S, G2, and M and includes replication of the genome and the subsequent segregation of chromosomes into daughter cells. In some variant cell cycles nuclear replication or nuclear division may not be followed by cell division, or G1 and G2 ph…	BP	3.51529e-06	160	1053	170688	1602382	0.000871597	8738	CRADD
bp.131	GO:0000278	mitotic cell cycle	Progression through the phases of the mitotic cell cycle, the most common eukaryotic cell cycle, which canonically comprises four successive phases called G1, S, G2, and M and includes replication of the genome and the subsequent segregation of chromosomes into daughter cells. In some variant cell cycles nuclear replication or nuclear division may not be followed by cell division, or G1 and G2 ph…	BP	3.51529e-06	160	1053	170688	1602382	0.000871597	200942	KLHDC8B
bp.132	GO:0000278	mitotic cell cycle	Progression through the phases of the mitotic cell cycle, the most common eukaryotic cell cycle, which canonically comprises four successive phases called G1, S, G2, and M and includes replication of the genome and the subsequent segregation of chromosomes into daughter cells. In some variant cell cycles nuclear replication or nuclear division may not be followed by cell division, or G1 and G2 ph…	BP	3.51529e-06	160	1053	170688	1602382	0.000871597	9639	ARHGEF10
bp.133	GO:0000278	mitotic cell cycle	Progression through the phases of the mitotic cell cycle, the most common eukaryotic cell cycle, which canonically comprises four successive phases called G1, S, G2, and M and includes replication of the genome and the subsequent segregation of chromosomes into daughter cells. In some variant cell cycles nuclear replication or nuclear division may not be followed by cell division, or G1 and G2 ph…	BP	3.51529e-06	160	1053	170688	1602382	0.000871597	1031	CDKN2C
bp.134	GO:0000278	mitotic cell cycle	Progression through the phases of the mitotic cell cycle, the most common eukaryotic cell cycle, which canonically comprises four successive phases called G1, S, G2, and M and includes replication of the genome and the subsequent segregation of chromosomes into daughter cells. In some variant cell cycles nuclear replication or nuclear division may not be followed by cell division, or G1 and G2 ph…	BP	3.51529e-06	160	1053	170688	1602382	0.000871597	4751	NEK2
bp.135	GO:0000278	mitotic cell cycle	Progression through the phases of the mitotic cell cycle, the most common eukaryotic cell cycle, which canonically comprises four successive phases called G1, S, G2, and M and includes replication of the genome and the subsequent segregation of chromosomes into daughter cells. In some variant cell cycles nuclear replication or nuclear division may not be followed by cell division, or G1 and G2 ph…	BP	3.51529e-06	160	1053	170688	1602382	0.000871597	4998	ORC1
bp.136	GO:0000278	mitotic cell cycle	Progression through the phases of the mitotic cell cycle, the most common eukaryotic cell cycle, which canonically comprises four successive phases called G1, S, G2, and M and includes replication of the genome and the subsequent segregation of chromosomes into daughter cells. In some variant cell cycles nuclear replication or nuclear division may not be followed by cell division, or G1 and G2 ph…	BP	3.51529e-06	160	1053	170688	1602382	0.000871597	4609	MYC
bp.137	GO:0000278	mitotic cell cycle	Progression through the phases of the mitotic cell cycle, the most common eukaryotic cell cycle, which canonically comprises four successive phases called G1, S, G2, and M and includes replication of the genome and the subsequent segregation of chromosomes into daughter cells. In some variant cell cycles nuclear replication or nuclear division may not be followed by cell division, or G1 and G2 ph…	BP	3.51529e-06	160	1053	170688	1602382	0.000871597	6790	AURKA
bp.138	GO:0000278	mitotic cell cycle	Progression through the phases of the mitotic cell cycle, the most common eukaryotic cell cycle, which canonically comprises four successive phases called G1, S, G2, and M and includes replication of the genome and the subsequent segregation of chromosomes into daughter cells. In some variant cell cycles nuclear replication or nuclear division may not be followed by cell division, or G1 and G2 ph…	BP	3.51529e-06	160	1053	170688	1602382	0.000871597	23332	CLASP1
bp.139	GO:0000278	mitotic cell cycle	Progression through the phases of the mitotic cell cycle, the most common eukaryotic cell cycle, which canonically comprises four successive phases called G1, S, G2, and M and includes replication of the genome and the subsequent segregation of chromosomes into daughter cells. In some variant cell cycles nuclear replication or nuclear division may not be followed by cell division, or G1 and G2 ph…	BP	3.51529e-06	160	1053	170688	1602382	0.000871597	83852	SETDB2
bp.140	GO:0000278	mitotic cell cycle	Progression through the phases of the mitotic cell cycle, the most common eukaryotic cell cycle, which canonically comprises four successive phases called G1, S, G2, and M and includes replication of the genome and the subsequent segregation of chromosomes into daughter cells. In some variant cell cycles nuclear replication or nuclear division may not be followed by cell division, or G1 and G2 ph…	BP	3.51529e-06	160	1053	170688	1602382	0.000871597	894	CCND2
bp.141	GO:0000278	mitotic cell cycle	Progression through the phases of the mitotic cell cycle, the most common eukaryotic cell cycle, which canonically comprises four successive phases called G1, S, G2, and M and includes replication of the genome and the subsequent segregation of chromosomes into daughter cells. In some variant cell cycles nuclear replication or nuclear division may not be followed by cell division, or G1 and G2 ph…	BP	3.51529e-06	160	1053	170688	1602382	0.000871597	2619	GAS1
bp.142	GO:0000278	mitotic cell cycle	Progression through the phases of the mitotic cell cycle, the most common eukaryotic cell cycle, which canonically comprises four successive phases called G1, S, G2, and M and includes replication of the genome and the subsequent segregation of chromosomes into daughter cells. In some variant cell cycles nuclear replication or nuclear division may not be followed by cell division, or G1 and G2 ph…	BP	3.51529e-06	160	1053	170688	1602382	0.000871597	51696	HECA
bp.143	GO:0000278	mitotic cell cycle	Progression through the phases of the mitotic cell cycle, the most common eukaryotic cell cycle, which canonically comprises four successive phases called G1, S, G2, and M and includes replication of the genome and the subsequent segregation of chromosomes into daughter cells. In some variant cell cycles nuclear replication or nuclear division may not be followed by cell division, or G1 and G2 ph…	BP	3.51529e-06	160	1053	170688	1602382	0.000871597	4193	MDM2
bp.144	GO:0000278	mitotic cell cycle	Progression through the phases of the mitotic cell cycle, the most common eukaryotic cell cycle, which canonically comprises four successive phases called G1, S, G2, and M and includes replication of the genome and the subsequent segregation of chromosomes into daughter cells. In some variant cell cycles nuclear replication or nuclear division may not be followed by cell division, or G1 and G2 ph…	BP	3.51529e-06	160	1053	170688	1602382	0.000871597	7157	TP53
bp.145	GO:0000278	mitotic cell cycle	Progression through the phases of the mitotic cell cycle, the most common eukaryotic cell cycle, which canonically comprises four successive phases called G1, S, G2, and M and includes replication of the genome and the subsequent segregation of chromosomes into daughter cells. In some variant cell cycles nuclear replication or nuclear division may not be followed by cell division, or G1 and G2 ph…	BP	3.51529e-06	160	1053	170688	1602382	0.000871597	8091	HMGA2
bp.146	GO:0000278	mitotic cell cycle	Progression through the phases of the mitotic cell cycle, the most common eukaryotic cell cycle, which canonically comprises four successive phases called G1, S, G2, and M and includes replication of the genome and the subsequent segregation of chromosomes into daughter cells. In some variant cell cycles nuclear replication or nuclear division may not be followed by cell division, or G1 and G2 ph…	BP	3.51529e-06	160	1053	170688	1602382	0.000871597	10253	SPRY2
bp.147	GO:0000278	mitotic cell cycle	Progression through the phases of the mitotic cell cycle, the most common eukaryotic cell cycle, which canonically comprises four successive phases called G1, S, G2, and M and includes replication of the genome and the subsequent segregation of chromosomes into daughter cells. In some variant cell cycles nuclear replication or nuclear division may not be followed by cell division, or G1 and G2 ph…	BP	3.51529e-06	160	1053	170688	1602382	0.000871597	8945	BTRC
bp.148	GO:0000278	mitotic cell cycle	Progression through the phases of the mitotic cell cycle, the most common eukaryotic cell cycle, which canonically comprises four successive phases called G1, S, G2, and M and includes replication of the genome and the subsequent segregation of chromosomes into daughter cells. In some variant cell cycles nuclear replication or nuclear division may not be followed by cell division, or G1 and G2 ph…	BP	3.51529e-06	160	1053	170688	1602382	0.000871597	9960	USP3
bp.149	GO:0000278	mitotic cell cycle	Progression through the phases of the mitotic cell cycle, the most common eukaryotic cell cycle, which canonically comprises four successive phases called G1, S, G2, and M and includes replication of the genome and the subsequent segregation of chromosomes into daughter cells. In some variant cell cycles nuclear replication or nuclear division may not be followed by cell division, or G1 and G2 ph…	BP	3.51529e-06	160	1053	170688	1602382	0.000871597	55904	KMT2E
bp.150	GO:0000278	mitotic cell cycle	Progression through the phases of the mitotic cell cycle, the most common eukaryotic cell cycle, which canonically comprises four successive phases called G1, S, G2, and M and includes replication of the genome and the subsequent segregation of chromosomes into daughter cells. In some variant cell cycles nuclear replication or nuclear division may not be followed by cell division, or G1 and G2 ph…	BP	3.51529e-06	160	1053	170688	1602382	0.000871597	134353	LSM11
bp.151	GO:0000278	mitotic cell cycle	Progression through the phases of the mitotic cell cycle, the most common eukaryotic cell cycle, which canonically comprises four successive phases called G1, S, G2, and M and includes replication of the genome and the subsequent segregation of chromosomes into daughter cells. In some variant cell cycles nuclear replication or nuclear division may not be followed by cell division, or G1 and G2 ph…	BP	3.51529e-06	160	1053	170688	1602382	0.000871597	7277	TUBA4A
bp.152	GO:0000278	mitotic cell cycle	Progression through the phases of the mitotic cell cycle, the most common eukaryotic cell cycle, which canonically comprises four successive phases called G1, S, G2, and M and includes replication of the genome and the subsequent segregation of chromosomes into daughter cells. In some variant cell cycles nuclear replication or nuclear division may not be followed by cell division, or G1 and G2 ph…	BP	3.51529e-06	160	1053	170688	1602382	0.000871597	55023	PHIP
bp.153	GO:0000278	mitotic cell cycle	Progression through the phases of the mitotic cell cycle, the most common eukaryotic cell cycle, which canonically comprises four successive phases called G1, S, G2, and M and includes replication of the genome and the subsequent segregation of chromosomes into daughter cells. In some variant cell cycles nuclear replication or nuclear division may not be followed by cell division, or G1 and G2 ph…	BP	3.51529e-06	160	1053	170688	1602382	0.000871597	2290	FOXG1
bp.154	GO:0000278	mitotic cell cycle	Progression through the phases of the mitotic cell cycle, the most common eukaryotic cell cycle, which canonically comprises four successive phases called G1, S, G2, and M and includes replication of the genome and the subsequent segregation of chromosomes into daughter cells. In some variant cell cycles nuclear replication or nuclear division may not be followed by cell division, or G1 and G2 ph…	BP	3.51529e-06	160	1053	170688	1602382	0.000871597	140609	NEK7
bp.155	GO:0000278	mitotic cell cycle	Progression through the phases of the mitotic cell cycle, the most common eukaryotic cell cycle, which canonically comprises four successive phases called G1, S, G2, and M and includes replication of the genome and the subsequent segregation of chromosomes into daughter cells. In some variant cell cycles nuclear replication or nuclear division may not be followed by cell division, or G1 and G2 ph…	BP	3.51529e-06	160	1053	170688	1602382	0.000871597	10361	NPM2
bp.156	GO:0000278	mitotic cell cycle	Progression through the phases of the mitotic cell cycle, the most common eukaryotic cell cycle, which canonically comprises four successive phases called G1, S, G2, and M and includes replication of the genome and the subsequent segregation of chromosomes into daughter cells. In some variant cell cycles nuclear replication or nuclear division may not be followed by cell division, or G1 and G2 ph…	BP	3.51529e-06	160	1053	170688	1602382	0.000871597	55142	HAUS2
bp.157	GO:0000278	mitotic cell cycle	Progression through the phases of the mitotic cell cycle, the most common eukaryotic cell cycle, which canonically comprises four successive phases called G1, S, G2, and M and includes replication of the genome and the subsequent segregation of chromosomes into daughter cells. In some variant cell cycles nuclear replication or nuclear division may not be followed by cell division, or G1 and G2 ph…	BP	3.51529e-06	160	1053	170688	1602382	0.000871597	56658	TRIM39
bp.158	GO:0000278	mitotic cell cycle	Progression through the phases of the mitotic cell cycle, the most common eukaryotic cell cycle, which canonically comprises four successive phases called G1, S, G2, and M and includes replication of the genome and the subsequent segregation of chromosomes into daughter cells. In some variant cell cycles nuclear replication or nuclear division may not be followed by cell division, or G1 and G2 ph…	BP	3.51529e-06	160	1053	170688	1602382	0.000871597	9184	BUB3
bp.159	GO:0000278	mitotic cell cycle	Progression through the phases of the mitotic cell cycle, the most common eukaryotic cell cycle, which canonically comprises four successive phases called G1, S, G2, and M and includes replication of the genome and the subsequent segregation of chromosomes into daughter cells. In some variant cell cycles nuclear replication or nuclear division may not be followed by cell division, or G1 and G2 ph…	BP	3.51529e-06	160	1053	170688	1602382	0.000871597	891	CCNB1
bp.160	GO:0000278	mitotic cell cycle	Progression through the phases of the mitotic cell cycle, the most common eukaryotic cell cycle, which canonically comprises four successive phases called G1, S, G2, and M and includes replication of the genome and the subsequent segregation of chromosomes into daughter cells. In some variant cell cycles nuclear replication or nuclear division may not be followed by cell division, or G1 and G2 ph…	BP	3.51529e-06	160	1053	170688	1602382	0.000871597	26993	AKAP8L
bp.161	GO:0000278	mitotic cell cycle	Progression through the phases of the mitotic cell cycle, the most common eukaryotic cell cycle, which canonically comprises four successive phases called G1, S, G2, and M and includes replication of the genome and the subsequent segregation of chromosomes into daughter cells. In some variant cell cycles nuclear replication or nuclear division may not be followed by cell division, or G1 and G2 ph…	BP	3.51529e-06	160	1053	170688	1602382	0.000871597	55571	CNOT11
bp.162	GO:0000278	mitotic cell cycle	Progression through the phases of the mitotic cell cycle, the most common eukaryotic cell cycle, which canonically comprises four successive phases called G1, S, G2, and M and includes replication of the genome and the subsequent segregation of chromosomes into daughter cells. In some variant cell cycles nuclear replication or nuclear division may not be followed by cell division, or G1 and G2 ph…	BP	3.51529e-06	160	1053	170688	1602382	0.000871597	131405	TRIM71
bp.163	GO:0000278	mitotic cell cycle	Progression through the phases of the mitotic cell cycle, the most common eukaryotic cell cycle, which canonically comprises four successive phases called G1, S, G2, and M and includes replication of the genome and the subsequent segregation of chromosomes into daughter cells. In some variant cell cycles nuclear replication or nuclear division may not be followed by cell division, or G1 and G2 ph…	BP	3.51529e-06	160	1053	170688	1602382	0.000871597	57472	CNOT6
bp.164	GO:0000278	mitotic cell cycle	Progression through the phases of the mitotic cell cycle, the most common eukaryotic cell cycle, which canonically comprises four successive phases called G1, S, G2, and M and includes replication of the genome and the subsequent segregation of chromosomes into daughter cells. In some variant cell cycles nuclear replication or nuclear division may not be followed by cell division, or G1 and G2 ph…	BP	3.51529e-06	160	1053	170688	1602382	0.000871597	25946	ZNF385A
bp.165	GO:0000278	mitotic cell cycle	Progression through the phases of the mitotic cell cycle, the most common eukaryotic cell cycle, which canonically comprises four successive phases called G1, S, G2, and M and includes replication of the genome and the subsequent segregation of chromosomes into daughter cells. In some variant cell cycles nuclear replication or nuclear division may not be followed by cell division, or G1 and G2 ph…	BP	3.51529e-06	160	1053	170688	1602382	0.000871597	146956	EME1
bp.166	GO:0000278	mitotic cell cycle	Progression through the phases of the mitotic cell cycle, the most common eukaryotic cell cycle, which canonically comprises four successive phases called G1, S, G2, and M and includes replication of the genome and the subsequent segregation of chromosomes into daughter cells. In some variant cell cycles nuclear replication or nuclear division may not be followed by cell division, or G1 and G2 ph…	BP	3.51529e-06	160	1053	170688	1602382	0.000871597	4660	PPP1R12B
bp.167	GO:0000278	mitotic cell cycle	Progression through the phases of the mitotic cell cycle, the most common eukaryotic cell cycle, which canonically comprises four successive phases called G1, S, G2, and M and includes replication of the genome and the subsequent segregation of chromosomes into daughter cells. In some variant cell cycles nuclear replication or nuclear division may not be followed by cell division, or G1 and G2 ph…	BP	3.51529e-06	160	1053	170688	1602382	0.000871597	25936	NSL1
bp.168	GO:0000278	mitotic cell cycle	Progression through the phases of the mitotic cell cycle, the most common eukaryotic cell cycle, which canonically comprises four successive phases called G1, S, G2, and M and includes replication of the genome and the subsequent segregation of chromosomes into daughter cells. In some variant cell cycles nuclear replication or nuclear division may not be followed by cell division, or G1 and G2 ph…	BP	3.51529e-06	160	1053	170688	1602382	0.000871597	6154	RPL26
bp.169	GO:0000278	mitotic cell cycle	Progression through the phases of the mitotic cell cycle, the most common eukaryotic cell cycle, which canonically comprises four successive phases called G1, S, G2, and M and includes replication of the genome and the subsequent segregation of chromosomes into daughter cells. In some variant cell cycles nuclear replication or nuclear division may not be followed by cell division, or G1 and G2 ph…	BP	3.51529e-06	160	1053	170688	1602382	0.000871597	84687	PPP1R9B
bp.170	GO:0000278	mitotic cell cycle	Progression through the phases of the mitotic cell cycle, the most common eukaryotic cell cycle, which canonically comprises four successive phases called G1, S, G2, and M and includes replication of the genome and the subsequent segregation of chromosomes into daughter cells. In some variant cell cycles nuclear replication or nuclear division may not be followed by cell division, or G1 and G2 ph…	BP	3.51529e-06	160	1053	170688	1602382	0.000871597	899	CCNF
bp.171	GO:0000278	mitotic cell cycle	Progression through the phases of the mitotic cell cycle, the most common eukaryotic cell cycle, which canonically comprises four successive phases called G1, S, G2, and M and includes replication of the genome and the subsequent segregation of chromosomes into daughter cells. In some variant cell cycles nuclear replication or nuclear division may not be followed by cell division, or G1 and G2 ph…	BP	3.51529e-06	160	1053	170688	1602382	0.000871597	9344	TAOK2
bp.172	GO:0000278	mitotic cell cycle	Progression through the phases of the mitotic cell cycle, the most common eukaryotic cell cycle, which canonically comprises four successive phases called G1, S, G2, and M and includes replication of the genome and the subsequent segregation of chromosomes into daughter cells. In some variant cell cycles nuclear replication or nuclear division may not be followed by cell division, or G1 and G2 ph…	BP	3.51529e-06	160	1053	170688	1602382	0.000871597	8086	AAAS
bp.173	GO:0000278	mitotic cell cycle	Progression through the phases of the mitotic cell cycle, the most common eukaryotic cell cycle, which canonically comprises four successive phases called G1, S, G2, and M and includes replication of the genome and the subsequent segregation of chromosomes into daughter cells. In some variant cell cycles nuclear replication or nuclear division may not be followed by cell division, or G1 and G2 ph…	BP	3.51529e-06	160	1053	170688	1602382	0.000871597	85378	TUBGCP6
bp.174	GO:0000278	mitotic cell cycle	Progression through the phases of the mitotic cell cycle, the most common eukaryotic cell cycle, which canonically comprises four successive phases called G1, S, G2, and M and includes replication of the genome and the subsequent segregation of chromosomes into daughter cells. In some variant cell cycles nuclear replication or nuclear division may not be followed by cell division, or G1 and G2 ph…	BP	3.51529e-06	160	1053	170688	1602382	0.000871597	808	CALM3
bp.175	GO:0000278	mitotic cell cycle	Progression through the phases of the mitotic cell cycle, the most common eukaryotic cell cycle, which canonically comprises four successive phases called G1, S, G2, and M and includes replication of the genome and the subsequent segregation of chromosomes into daughter cells. In some variant cell cycles nuclear replication or nuclear division may not be followed by cell division, or G1 and G2 ph…	BP	3.51529e-06	160	1053	170688	1602382	0.000871597	9126	SMC3
bp.176	GO:0000278	mitotic cell cycle	Progression through the phases of the mitotic cell cycle, the most common eukaryotic cell cycle, which canonically comprises four successive phases called G1, S, G2, and M and includes replication of the genome and the subsequent segregation of chromosomes into daughter cells. In some variant cell cycles nuclear replication or nuclear division may not be followed by cell division, or G1 and G2 ph…	BP	3.51529e-06	160	1053	170688	1602382	0.000871597	901	CCNG2
bp.177	GO:0000278	mitotic cell cycle	Progression through the phases of the mitotic cell cycle, the most common eukaryotic cell cycle, which canonically comprises four successive phases called G1, S, G2, and M and includes replication of the genome and the subsequent segregation of chromosomes into daughter cells. In some variant cell cycles nuclear replication or nuclear division may not be followed by cell division, or G1 and G2 ph…	BP	3.51529e-06	160	1053	170688	1602382	0.000871597	54930	HAUS4
bp.178	GO:0000278	mitotic cell cycle	Progression through the phases of the mitotic cell cycle, the most common eukaryotic cell cycle, which canonically comprises four successive phases called G1, S, G2, and M and includes replication of the genome and the subsequent segregation of chromosomes into daughter cells. In some variant cell cycles nuclear replication or nuclear division may not be followed by cell division, or G1 and G2 ph…	BP	3.51529e-06	160	1053	170688	1602382	0.000871597	29781	NCAPH2
bp.179	GO:0000278	mitotic cell cycle	Progression through the phases of the mitotic cell cycle, the most common eukaryotic cell cycle, which canonically comprises four successive phases called G1, S, G2, and M and includes replication of the genome and the subsequent segregation of chromosomes into daughter cells. In some variant cell cycles nuclear replication or nuclear division may not be followed by cell division, or G1 and G2 ph…	BP	3.51529e-06	160	1053	170688	1602382	0.000871597	5933	RBL1
bp.180	GO:0000278	mitotic cell cycle	Progression through the phases of the mitotic cell cycle, the most common eukaryotic cell cycle, which canonically comprises four successive phases called G1, S, G2, and M and includes replication of the genome and the subsequent segregation of chromosomes into daughter cells. In some variant cell cycles nuclear replication or nuclear division may not be followed by cell division, or G1 and G2 ph…	BP	3.51529e-06	160	1053	170688	1602382	0.000871597	91603	ZNF830
bp.181	GO:0000278	mitotic cell cycle	Progression through the phases of the mitotic cell cycle, the most common eukaryotic cell cycle, which canonically comprises four successive phases called G1, S, G2, and M and includes replication of the genome and the subsequent segregation of chromosomes into daughter cells. In some variant cell cycles nuclear replication or nuclear division may not be followed by cell division, or G1 and G2 ph…	BP	3.51529e-06	160	1053	170688	1602382	0.000871597	54984	PINX1
bp.182	GO:0000278	mitotic cell cycle	Progression through the phases of the mitotic cell cycle, the most common eukaryotic cell cycle, which canonically comprises four successive phases called G1, S, G2, and M and includes replication of the genome and the subsequent segregation of chromosomes into daughter cells. In some variant cell cycles nuclear replication or nuclear division may not be followed by cell division, or G1 and G2 ph…	BP	3.51529e-06	160	1053	170688	1602382	0.000871597	23116	FAM179B
bp.183	GO:0000278	mitotic cell cycle	Progression through the phases of the mitotic cell cycle, the most common eukaryotic cell cycle, which canonically comprises four successive phases called G1, S, G2, and M and includes replication of the genome and the subsequent segregation of chromosomes into daughter cells. In some variant cell cycles nuclear replication or nuclear division may not be followed by cell division, or G1 and G2 ph…	BP	3.51529e-06	160	1053	170688	1602382	0.000871597	7532	YWHAG
bp.184	GO:0000278	mitotic cell cycle	Progression through the phases of the mitotic cell cycle, the most common eukaryotic cell cycle, which canonically comprises four successive phases called G1, S, G2, and M and includes replication of the genome and the subsequent segregation of chromosomes into daughter cells. In some variant cell cycles nuclear replication or nuclear division may not be followed by cell division, or G1 and G2 ph…	BP	3.51529e-06	160	1053	170688	1602382	0.000871597	9585	KIF20B
bp.185	GO:0000278	mitotic cell cycle	Progression through the phases of the mitotic cell cycle, the most common eukaryotic cell cycle, which canonically comprises four successive phases called G1, S, G2, and M and includes replication of the genome and the subsequent segregation of chromosomes into daughter cells. In some variant cell cycles nuclear replication or nuclear division may not be followed by cell division, or G1 and G2 ph…	BP	3.51529e-06	160	1053	170688	1602382	0.000871597	9183	ZW10
bp.186	GO:0000278	mitotic cell cycle	Progression through the phases of the mitotic cell cycle, the most common eukaryotic cell cycle, which canonically comprises four successive phases called G1, S, G2, and M and includes replication of the genome and the subsequent segregation of chromosomes into daughter cells. In some variant cell cycles nuclear replication or nuclear division may not be followed by cell division, or G1 and G2 ph…	BP	3.51529e-06	160	1053	170688	1602382	0.000871597	23172	FAM175B
bp.187	GO:0000278	mitotic cell cycle	Progression through the phases of the mitotic cell cycle, the most common eukaryotic cell cycle, which canonically comprises four successive phases called G1, S, G2, and M and includes replication of the genome and the subsequent segregation of chromosomes into daughter cells. In some variant cell cycles nuclear replication or nuclear division may not be followed by cell division, or G1 and G2 ph…	BP	3.51529e-06	160	1053	170688	1602382	0.000871597	4174	MCM5
bp.188	GO:0000278	mitotic cell cycle	Progression through the phases of the mitotic cell cycle, the most common eukaryotic cell cycle, which canonically comprises four successive phases called G1, S, G2, and M and includes replication of the genome and the subsequent segregation of chromosomes into daughter cells. In some variant cell cycles nuclear replication or nuclear division may not be followed by cell division, or G1 and G2 ph…	BP	3.51529e-06	160	1053	170688	1602382	0.000871597	5777	PTPN6
bp.189	GO:0000278	mitotic cell cycle	Progression through the phases of the mitotic cell cycle, the most common eukaryotic cell cycle, which canonically comprises four successive phases called G1, S, G2, and M and includes replication of the genome and the subsequent segregation of chromosomes into daughter cells. In some variant cell cycles nuclear replication or nuclear division may not be followed by cell division, or G1 and G2 ph…	BP	3.51529e-06	160	1053	170688	1602382	0.000871597	26574	AATF
bp.190	GO:0000278	mitotic cell cycle	Progression through the phases of the mitotic cell cycle, the most common eukaryotic cell cycle, which canonically comprises four successive phases called G1, S, G2, and M and includes replication of the genome and the subsequent segregation of chromosomes into daughter cells. In some variant cell cycles nuclear replication or nuclear division may not be followed by cell division, or G1 and G2 ph…	BP	3.51529e-06	160	1053	170688	1602382	0.000871597	1163	CKS1B
bp.191	GO:0000278	mitotic cell cycle	Progression through the phases of the mitotic cell cycle, the most common eukaryotic cell cycle, which canonically comprises four successive phases called G1, S, G2, and M and includes replication of the genome and the subsequent segregation of chromosomes into daughter cells. In some variant cell cycles nuclear replication or nuclear division may not be followed by cell division, or G1 and G2 ph…	BP	3.51529e-06	160	1053	170688	1602382	0.000871597	54619	CCNJ
bp.192	GO:0000278	mitotic cell cycle	Progression through the phases of the mitotic cell cycle, the most common eukaryotic cell cycle, which canonically comprises four successive phases called G1, S, G2, and M and includes replication of the genome and the subsequent segregation of chromosomes into daughter cells. In some variant cell cycles nuclear replication or nuclear division may not be followed by cell division, or G1 and G2 ph…	BP	3.51529e-06	160	1053	170688	1602382	0.000871597	8636	SSNA1
bp.193	GO:0000278	mitotic cell cycle	Progression through the phases of the mitotic cell cycle, the most common eukaryotic cell cycle, which canonically comprises four successive phases called G1, S, G2, and M and includes replication of the genome and the subsequent segregation of chromosomes into daughter cells. In some variant cell cycles nuclear replication or nuclear division may not be followed by cell division, or G1 and G2 ph…	BP	3.51529e-06	160	1053	170688	1602382	0.000871597	4779	NFE2L1
bp.194	GO:0000278	mitotic cell cycle	Progression through the phases of the mitotic cell cycle, the most common eukaryotic cell cycle, which canonically comprises four successive phases called G1, S, G2, and M and includes replication of the genome and the subsequent segregation of chromosomes into daughter cells. In some variant cell cycles nuclear replication or nuclear division may not be followed by cell division, or G1 and G2 ph…	BP	3.51529e-06	160	1053	170688	1602382	0.000871597	65975	STK33
bp.195	GO:0000278	mitotic cell cycle	Progression through the phases of the mitotic cell cycle, the most common eukaryotic cell cycle, which canonically comprises four successive phases called G1, S, G2, and M and includes replication of the genome and the subsequent segregation of chromosomes into daughter cells. In some variant cell cycles nuclear replication or nuclear division may not be followed by cell division, or G1 and G2 ph…	BP	3.51529e-06	160	1053	170688	1602382	0.000871597	3364	HUS1
bp.196	GO:0000278	mitotic cell cycle	Progression through the phases of the mitotic cell cycle, the most common eukaryotic cell cycle, which canonically comprises four successive phases called G1, S, G2, and M and includes replication of the genome and the subsequent segregation of chromosomes into daughter cells. In some variant cell cycles nuclear replication or nuclear division may not be followed by cell division, or G1 and G2 ph…	BP	3.51529e-06	160	1053	170688	1602382	0.000871597	84962	AJUBA
bp.197	GO:0000278	mitotic cell cycle	Progression through the phases of the mitotic cell cycle, the most common eukaryotic cell cycle, which canonically comprises four successive phases called G1, S, G2, and M and includes replication of the genome and the subsequent segregation of chromosomes into daughter cells. In some variant cell cycles nuclear replication or nuclear division may not be followed by cell division, or G1 and G2 ph…	BP	3.51529e-06	160	1053	170688	1602382	0.000871597	7465	WEE1
bp.198	GO:0000278	mitotic cell cycle	Progression through the phases of the mitotic cell cycle, the most common eukaryotic cell cycle, which canonically comprises four successive phases called G1, S, G2, and M and includes replication of the genome and the subsequent segregation of chromosomes into daughter cells. In some variant cell cycles nuclear replication or nuclear division may not be followed by cell division, or G1 and G2 ph…	BP	3.51529e-06	160	1053	170688	1602382	0.000871597	835	CASP2
bp.199	GO:0000278	mitotic cell cycle	Progression through the phases of the mitotic cell cycle, the most common eukaryotic cell cycle, which canonically comprises four successive phases called G1, S, G2, and M and includes replication of the genome and the subsequent segregation of chromosomes into daughter cells. In some variant cell cycles nuclear replication or nuclear division may not be followed by cell division, or G1 and G2 ph…	BP	3.51529e-06	160	1053	170688	1602382	0.000871597	91272	BOD1
bp.200	GO:0000278	mitotic cell cycle	Progression through the phases of the mitotic cell cycle, the most common eukaryotic cell cycle, which canonically comprises four successive phases called G1, S, G2, and M and includes replication of the genome and the subsequent segregation of chromosomes into daughter cells. In some variant cell cycles nuclear replication or nuclear division may not be followed by cell division, or G1 and G2 ph…	BP	3.51529e-06	160	1053	170688	1602382	0.000871597	581	BAX
bp.201	GO:0000278	mitotic cell cycle	Progression through the phases of the mitotic cell cycle, the most common eukaryotic cell cycle, which canonically comprises four successive phases called G1, S, G2, and M and includes replication of the genome and the subsequent segregation of chromosomes into daughter cells. In some variant cell cycles nuclear replication or nuclear division may not be followed by cell division, or G1 and G2 ph…	BP	3.51529e-06	160	1053	170688	1602382	0.000871597	10300	KATNB1
bp.202	GO:0000278	mitotic cell cycle	Progression through the phases of the mitotic cell cycle, the most common eukaryotic cell cycle, which canonically comprises four successive phases called G1, S, G2, and M and includes replication of the genome and the subsequent segregation of chromosomes into daughter cells. In some variant cell cycles nuclear replication or nuclear division may not be followed by cell division, or G1 and G2 ph…	BP	3.51529e-06	160	1053	170688	1602382	0.000871597	221035	REEP3
bp.203	GO:0000278	mitotic cell cycle	Progression through the phases of the mitotic cell cycle, the most common eukaryotic cell cycle, which canonically comprises four successive phases called G1, S, G2, and M and includes replication of the genome and the subsequent segregation of chromosomes into daughter cells. In some variant cell cycles nuclear replication or nuclear division may not be followed by cell division, or G1 and G2 ph…	BP	3.51529e-06	160	1053	170688	1602382	0.000871597	3837	KPNB1
bp.204	GO:0001501	skeletal system development	The process whose specific outcome is the progression of the skeleton over time, from its formation to the mature structure. The skeleton is the bony framework of the body in vertebrates (endoskeleton) or the hard outer envelope of insects (exoskeleton or dermoskeleton).	BP	1.36982e-05	87	517	170688	1602382	0.00239746	91461	PKDCC
bp.205	GO:0001501	skeletal system development	The process whose specific outcome is the progression of the skeleton over time, from its formation to the mature structure. The skeleton is the bony framework of the body in vertebrates (endoskeleton) or the hard outer envelope of insects (exoskeleton or dermoskeleton).	BP	1.36982e-05	87	517	170688	1602382	0.00239746	2249	FGF4
bp.206	GO:0001501	skeletal system development	The process whose specific outcome is the progression of the skeleton over time, from its formation to the mature structure. The skeleton is the bony framework of the body in vertebrates (endoskeleton) or the hard outer envelope of insects (exoskeleton or dermoskeleton).	BP	1.36982e-05	87	517	170688	1602382	0.00239746	8840	WISP1
bp.207	GO:0001501	skeletal system development	The process whose specific outcome is the progression of the skeleton over time, from its formation to the mature structure. The skeleton is the bony framework of the body in vertebrates (endoskeleton) or the hard outer envelope of insects (exoskeleton or dermoskeleton).	BP	1.36982e-05	87	517	170688	1602382	0.00239746	7704	ZBTB16
bp.208	GO:0001501	skeletal system development	The process whose specific outcome is the progression of the skeleton over time, from its formation to the mature structure. The skeleton is the bony framework of the body in vertebrates (endoskeleton) or the hard outer envelope of insects (exoskeleton or dermoskeleton).	BP	1.36982e-05	87	517	170688	1602382	0.00239746	655	BMP7
bp.209	GO:0001501	skeletal system development	The process whose specific outcome is the progression of the skeleton over time, from its formation to the mature structure. The skeleton is the bony framework of the body in vertebrates (endoskeleton) or the hard outer envelope of insects (exoskeleton or dermoskeleton).	BP	1.36982e-05	87	517	170688	1602382	0.00239746	55294	FBXW7
bp.210	GO:0001501	skeletal system development	The process whose specific outcome is the progression of the skeleton over time, from its formation to the mature structure. The skeleton is the bony framework of the body in vertebrates (endoskeleton) or the hard outer envelope of insects (exoskeleton or dermoskeleton).	BP	1.36982e-05	87	517	170688	1602382	0.00239746	6591	SNAI2
bp.211	GO:0001501	skeletal system development	The process whose specific outcome is the progression of the skeleton over time, from its formation to the mature structure. The skeleton is the bony framework of the body in vertebrates (endoskeleton) or the hard outer envelope of insects (exoskeleton or dermoskeleton).	BP	1.36982e-05	87	517	170688	1602382	0.00239746	80199	FUZ
bp.212	GO:0001501	skeletal system development	The process whose specific outcome is the progression of the skeleton over time, from its formation to the mature structure. The skeleton is the bony framework of the body in vertebrates (endoskeleton) or the hard outer envelope of insects (exoskeleton or dermoskeleton).	BP	1.36982e-05	87	517	170688	1602382	0.00239746	1462	VCAN
bp.213	GO:0001501	skeletal system development	The process whose specific outcome is the progression of the skeleton over time, from its formation to the mature structure. The skeleton is the bony framework of the body in vertebrates (endoskeleton) or the hard outer envelope of insects (exoskeleton or dermoskeleton).	BP	1.36982e-05	87	517	170688	1602382	0.00239746	8091	HMGA2
bp.214	GO:0001501	skeletal system development	The process whose specific outcome is the progression of the skeleton over time, from its formation to the mature structure. The skeleton is the bony framework of the body in vertebrates (endoskeleton) or the hard outer envelope of insects (exoskeleton or dermoskeleton).	BP	1.36982e-05	87	517	170688	1602382	0.00239746	4092	SMAD7
bp.215	GO:0001501	skeletal system development	The process whose specific outcome is the progression of the skeleton over time, from its formation to the mature structure. The skeleton is the bony framework of the body in vertebrates (endoskeleton) or the hard outer envelope of insects (exoskeleton or dermoskeleton).	BP	1.36982e-05	87	517	170688	1602382	0.00239746	5970	RELA
bp.216	GO:0001501	skeletal system development	The process whose specific outcome is the progression of the skeleton over time, from its formation to the mature structure. The skeleton is the bony framework of the body in vertebrates (endoskeleton) or the hard outer envelope of insects (exoskeleton or dermoskeleton).	BP	1.36982e-05	87	517	170688	1602382	0.00239746	51141	INSIG2
bp.217	GO:0001501	skeletal system development	The process whose specific outcome is the progression of the skeleton over time, from its formation to the mature structure. The skeleton is the bony framework of the body in vertebrates (endoskeleton) or the hard outer envelope of insects (exoskeleton or dermoskeleton).	BP	1.36982e-05	87	517	170688	1602382	0.00239746	9321	TRIP11
bp.218	GO:0001501	skeletal system development	The process whose specific outcome is the progression of the skeleton over time, from its formation to the mature structure. The skeleton is the bony framework of the body in vertebrates (endoskeleton) or the hard outer envelope of insects (exoskeleton or dermoskeleton).	BP	1.36982e-05	87	517	170688	1602382	0.00239746	10019	SH2B3
bp.219	GO:0001501	skeletal system development	The process whose specific outcome is the progression of the skeleton over time, from its formation to the mature structure. The skeleton is the bony framework of the body in vertebrates (endoskeleton) or the hard outer envelope of insects (exoskeleton or dermoskeleton).	BP	1.36982e-05	87	517	170688	1602382	0.00239746	4762	NEUROG1
bp.220	GO:0001501	skeletal system development	The process whose specific outcome is the progression of the skeleton over time, from its formation to the mature structure. The skeleton is the bony framework of the body in vertebrates (endoskeleton) or the hard outer envelope of insects (exoskeleton or dermoskeleton).	BP	1.36982e-05	87	517	170688	1602382	0.00239746	1490	CTGF
bp.221	GO:0001501	skeletal system development	The process whose specific outcome is the progression of the skeleton over time, from its formation to the mature structure. The skeleton is the bony framework of the body in vertebrates (endoskeleton) or the hard outer envelope of insects (exoskeleton or dermoskeleton).	BP	1.36982e-05	87	517	170688	1602382	0.00239746	2260	FGFR1
bp.222	GO:0001501	skeletal system development	The process whose specific outcome is the progression of the skeleton over time, from its formation to the mature structure. The skeleton is the bony framework of the body in vertebrates (endoskeleton) or the hard outer envelope of insects (exoskeleton or dermoskeleton).	BP	1.36982e-05	87	517	170688	1602382	0.00239746	3696	ITGB8
bp.223	GO:0001501	skeletal system development	The process whose specific outcome is the progression of the skeleton over time, from its formation to the mature structure. The skeleton is the bony framework of the body in vertebrates (endoskeleton) or the hard outer envelope of insects (exoskeleton or dermoskeleton).	BP	1.36982e-05	87	517	170688	1602382	0.00239746	10683	DLL3
bp.224	GO:0001501	skeletal system development	The process whose specific outcome is the progression of the skeleton over time, from its formation to the mature structure. The skeleton is the bony framework of the body in vertebrates (endoskeleton) or the hard outer envelope of insects (exoskeleton or dermoskeleton).	BP	1.36982e-05	87	517	170688	1602382	0.00239746	7353	UFD1L
bp.225	GO:0001501	skeletal system development	The process whose specific outcome is the progression of the skeleton over time, from its formation to the mature structure. The skeleton is the bony framework of the body in vertebrates (endoskeleton) or the hard outer envelope of insects (exoskeleton or dermoskeleton).	BP	1.36982e-05	87	517	170688	1602382	0.00239746	7004	TEAD4
bp.226	GO:0001501	skeletal system development	The process whose specific outcome is the progression of the skeleton over time, from its formation to the mature structure. The skeleton is the bony framework of the body in vertebrates (endoskeleton) or the hard outer envelope of insects (exoskeleton or dermoskeleton).	BP	1.36982e-05	87	517	170688	1602382	0.00239746	6926	TBX3
bp.227	GO:0001501	skeletal system development	The process whose specific outcome is the progression of the skeleton over time, from its formation to the mature structure. The skeleton is the bony framework of the body in vertebrates (endoskeleton) or the hard outer envelope of insects (exoskeleton or dermoskeleton).	BP	1.36982e-05	87	517	170688	1602382	0.00239746	9350	CER1
bp.228	GO:0001501	skeletal system development	The process whose specific outcome is the progression of the skeleton over time, from its formation to the mature structure. The skeleton is the bony framework of the body in vertebrates (endoskeleton) or the hard outer envelope of insects (exoskeleton or dermoskeleton).	BP	1.36982e-05	87	517	170688	1602382	0.00239746	2254	FGF9
bp.229	GO:0001501	skeletal system development	The process whose specific outcome is the progression of the skeleton over time, from its formation to the mature structure. The skeleton is the bony framework of the body in vertebrates (endoskeleton) or the hard outer envelope of insects (exoskeleton or dermoskeleton).	BP	1.36982e-05	87	517	170688	1602382	0.00239746	3198	HOXA1
bp.230	GO:0001501	skeletal system development	The process whose specific outcome is the progression of the skeleton over time, from its formation to the mature structure. The skeleton is the bony framework of the body in vertebrates (endoskeleton) or the hard outer envelope of insects (exoskeleton or dermoskeleton).	BP	1.36982e-05	87	517	170688	1602382	0.00239746	6495	SIX1
bp.231	GO:0001501	skeletal system development	The process whose specific outcome is the progression of the skeleton over time, from its formation to the mature structure. The skeleton is the bony framework of the body in vertebrates (endoskeleton) or the hard outer envelope of insects (exoskeleton or dermoskeleton).	BP	1.36982e-05	87	517	170688	1602382	0.00239746	654	BMP6
bp.232	GO:0001501	skeletal system development	The process whose specific outcome is the progression of the skeleton over time, from its formation to the mature structure. The skeleton is the bony framework of the body in vertebrates (endoskeleton) or the hard outer envelope of insects (exoskeleton or dermoskeleton).	BP	1.36982e-05	87	517	170688	1602382	0.00239746	57453	DSCAML1
bp.233	GO:0001501	skeletal system development	The process whose specific outcome is the progression of the skeleton over time, from its formation to the mature structure. The skeleton is the bony framework of the body in vertebrates (endoskeleton) or the hard outer envelope of insects (exoskeleton or dermoskeleton).	BP	1.36982e-05	87	517	170688	1602382	0.00239746	4211	MEIS1
bp.234	GO:0001501	skeletal system development	The process whose specific outcome is the progression of the skeleton over time, from its formation to the mature structure. The skeleton is the bony framework of the body in vertebrates (endoskeleton) or the hard outer envelope of insects (exoskeleton or dermoskeleton).	BP	1.36982e-05	87	517	170688	1602382	0.00239746	6137	RPL13
bp.235	GO:0001501	skeletal system development	The process whose specific outcome is the progression of the skeleton over time, from its formation to the mature structure. The skeleton is the bony framework of the body in vertebrates (endoskeleton) or the hard outer envelope of insects (exoskeleton or dermoskeleton).	BP	1.36982e-05	87	517	170688	1602382	0.00239746	8195	MKKS
bp.236	GO:0001501	skeletal system development	The process whose specific outcome is the progression of the skeleton over time, from its formation to the mature structure. The skeleton is the bony framework of the body in vertebrates (endoskeleton) or the hard outer envelope of insects (exoskeleton or dermoskeleton).	BP	1.36982e-05	87	517	170688	1602382	0.00239746	4982	TNFRSF11B
bp.237	GO:0001501	skeletal system development	The process whose specific outcome is the progression of the skeleton over time, from its formation to the mature structure. The skeleton is the bony framework of the body in vertebrates (endoskeleton) or the hard outer envelope of insects (exoskeleton or dermoskeleton).	BP	1.36982e-05	87	517	170688	1602382	0.00239746	7468	WHSC1
bp.238	GO:0001501	skeletal system development	The process whose specific outcome is the progression of the skeleton over time, from its formation to the mature structure. The skeleton is the bony framework of the body in vertebrates (endoskeleton) or the hard outer envelope of insects (exoskeleton or dermoskeleton).	BP	1.36982e-05	87	517	170688	1602382	0.00239746	3373	HYAL1
bp.239	GO:0001501	skeletal system development	The process whose specific outcome is the progression of the skeleton over time, from its formation to the mature structure. The skeleton is the bony framework of the body in vertebrates (endoskeleton) or the hard outer envelope of insects (exoskeleton or dermoskeleton).	BP	1.36982e-05	87	517	170688	1602382	0.00239746	3231	HOXD1
bp.240	GO:0001501	skeletal system development	The process whose specific outcome is the progression of the skeleton over time, from its formation to the mature structure. The skeleton is the bony framework of the body in vertebrates (endoskeleton) or the hard outer envelope of insects (exoskeleton or dermoskeleton).	BP	1.36982e-05	87	517	170688	1602382	0.00239746	84667	HES7
bp.241	GO:0001501	skeletal system development	The process whose specific outcome is the progression of the skeleton over time, from its formation to the mature structure. The skeleton is the bony framework of the body in vertebrates (endoskeleton) or the hard outer envelope of insects (exoskeleton or dermoskeleton).	BP	1.36982e-05	87	517	170688	1602382	0.00239746	8313	AXIN2
bp.242	GO:0001501	skeletal system development	The process whose specific outcome is the progression of the skeleton over time, from its formation to the mature structure. The skeleton is the bony framework of the body in vertebrates (endoskeleton) or the hard outer envelope of insects (exoskeleton or dermoskeleton).	BP	1.36982e-05	87	517	170688	1602382	0.00239746	4617	MYF5
bp.243	GO:0001501	skeletal system development	The process whose specific outcome is the progression of the skeleton over time, from its formation to the mature structure. The skeleton is the bony framework of the body in vertebrates (endoskeleton) or the hard outer envelope of insects (exoskeleton or dermoskeleton).	BP	1.36982e-05	87	517	170688	1602382	0.00239746	3232	HOXD3
bp.244	GO:0001501	skeletal system development	The process whose specific outcome is the progression of the skeleton over time, from its formation to the mature structure. The skeleton is the bony framework of the body in vertebrates (endoskeleton) or the hard outer envelope of insects (exoskeleton or dermoskeleton).	BP	1.36982e-05	87	517	170688	1602382	0.00239746	5549	PRELP
bp.245	GO:0001501	skeletal system development	The process whose specific outcome is the progression of the skeleton over time, from its formation to the mature structure. The skeleton is the bony framework of the body in vertebrates (endoskeleton) or the hard outer envelope of insects (exoskeleton or dermoskeleton).	BP	1.36982e-05	87	517	170688	1602382	0.00239746	4487	MSX1
bp.246	GO:0001501	skeletal system development	The process whose specific outcome is the progression of the skeleton over time, from its formation to the mature structure. The skeleton is the bony framework of the body in vertebrates (endoskeleton) or the hard outer envelope of insects (exoskeleton or dermoskeleton).	BP	1.36982e-05	87	517	170688	1602382	0.00239746	3212	HOXB2
bp.247	GO:0001501	skeletal system development	The process whose specific outcome is the progression of the skeleton over time, from its formation to the mature structure. The skeleton is the bony framework of the body in vertebrates (endoskeleton) or the hard outer envelope of insects (exoskeleton or dermoskeleton).	BP	1.36982e-05	87	517	170688	1602382	0.00239746	3211	HOXB1
bp.248	GO:0001501	skeletal system development	The process whose specific outcome is the progression of the skeleton over time, from its formation to the mature structure. The skeleton is the bony framework of the body in vertebrates (endoskeleton) or the hard outer envelope of insects (exoskeleton or dermoskeleton).	BP	1.36982e-05	87	517	170688	1602382	0.00239746	3636	INPPL1
bp.249	GO:0001501	skeletal system development	The process whose specific outcome is the progression of the skeleton over time, from its formation to the mature structure. The skeleton is the bony framework of the body in vertebrates (endoskeleton) or the hard outer envelope of insects (exoskeleton or dermoskeleton).	BP	1.36982e-05	87	517	170688	1602382	0.00239746	5914	RARA
bp.250	GO:0001501	skeletal system development	The process whose specific outcome is the progression of the skeleton over time, from its formation to the mature structure. The skeleton is the bony framework of the body in vertebrates (endoskeleton) or the hard outer envelope of insects (exoskeleton or dermoskeleton).	BP	1.36982e-05	87	517	170688	1602382	0.00239746	9451	EIF2AK3
bp.251	GO:0001501	skeletal system development	The process whose specific outcome is the progression of the skeleton over time, from its formation to the mature structure. The skeleton is the bony framework of the body in vertebrates (endoskeleton) or the hard outer envelope of insects (exoskeleton or dermoskeleton).	BP	1.36982e-05	87	517	170688	1602382	0.00239746	5156	PDGFRA
bp.252	GO:0001501	skeletal system development	The process whose specific outcome is the progression of the skeleton over time, from its formation to the mature structure. The skeleton is the bony framework of the body in vertebrates (endoskeleton) or the hard outer envelope of insects (exoskeleton or dermoskeleton).	BP	1.36982e-05	87	517	170688	1602382	0.00239746	4192	MDK
bp.253	GO:0001501	skeletal system development	The process whose specific outcome is the progression of the skeleton over time, from its formation to the mature structure. The skeleton is the bony framework of the body in vertebrates (endoskeleton) or the hard outer envelope of insects (exoskeleton or dermoskeleton).	BP	1.36982e-05	87	517	170688	1602382	0.00239746	3221	HOXC4
bp.254	GO:0001501	skeletal system development	The process whose specific outcome is the progression of the skeleton over time, from its formation to the mature structure. The skeleton is the bony framework of the body in vertebrates (endoskeleton) or the hard outer envelope of insects (exoskeleton or dermoskeleton).	BP	1.36982e-05	87	517	170688	1602382	0.00239746	3215	HOXB5
bp.255	GO:0001501	skeletal system development	The process whose specific outcome is the progression of the skeleton over time, from its formation to the mature structure. The skeleton is the bony framework of the body in vertebrates (endoskeleton) or the hard outer envelope of insects (exoskeleton or dermoskeleton).	BP	1.36982e-05	87	517	170688	1602382	0.00239746	81029	WNT5B
bp.256	GO:0001501	skeletal system development	The process whose specific outcome is the progression of the skeleton over time, from its formation to the mature structure. The skeleton is the bony framework of the body in vertebrates (endoskeleton) or the hard outer envelope of insects (exoskeleton or dermoskeleton).	BP	1.36982e-05	87	517	170688	1602382	0.00239746	5081	PAX7
bp.257	GO:0001501	skeletal system development	The process whose specific outcome is the progression of the skeleton over time, from its formation to the mature structure. The skeleton is the bony framework of the body in vertebrates (endoskeleton) or the hard outer envelope of insects (exoskeleton or dermoskeleton).	BP	1.36982e-05	87	517	170688	1602382	0.00239746	25886	POC1A
bp.258	GO:0001501	skeletal system development	The process whose specific outcome is the progression of the skeleton over time, from its formation to the mature structure. The skeleton is the bony framework of the body in vertebrates (endoskeleton) or the hard outer envelope of insects (exoskeleton or dermoskeleton).	BP	1.36982e-05	87	517	170688	1602382	0.00239746	6423	SFRP2
bp.259	GO:0001501	skeletal system development	The process whose specific outcome is the progression of the skeleton over time, from its formation to the mature structure. The skeleton is the bony framework of the body in vertebrates (endoskeleton) or the hard outer envelope of insects (exoskeleton or dermoskeleton).	BP	1.36982e-05	87	517	170688	1602382	0.00239746	1044	CDX1
bp.260	GO:0001501	skeletal system development	The process whose specific outcome is the progression of the skeleton over time, from its formation to the mature structure. The skeleton is the bony framework of the body in vertebrates (endoskeleton) or the hard outer envelope of insects (exoskeleton or dermoskeleton).	BP	1.36982e-05	87	517	170688	1602382	0.00239746	3218	HOXB8
bp.261	GO:0001501	skeletal system development	The process whose specific outcome is the progression of the skeleton over time, from its formation to the mature structure. The skeleton is the bony framework of the body in vertebrates (endoskeleton) or the hard outer envelope of insects (exoskeleton or dermoskeleton).	BP	1.36982e-05	87	517	170688	1602382	0.00239746	3204	HOXA7
bp.262	GO:0001501	skeletal system development	The process whose specific outcome is the progression of the skeleton over time, from its formation to the mature structure. The skeleton is the bony framework of the body in vertebrates (endoskeleton) or the hard outer envelope of insects (exoskeleton or dermoskeleton).	BP	1.36982e-05	87	517	170688	1602382	0.00239746	3214	HOXB4
bp.263	GO:0001501	skeletal system development	The process whose specific outcome is the progression of the skeleton over time, from its formation to the mature structure. The skeleton is the bony framework of the body in vertebrates (endoskeleton) or the hard outer envelope of insects (exoskeleton or dermoskeleton).	BP	1.36982e-05	87	517	170688	1602382	0.00239746	23213	SULF1
bp.264	GO:0001501	skeletal system development	The process whose specific outcome is the progression of the skeleton over time, from its formation to the mature structure. The skeleton is the bony framework of the body in vertebrates (endoskeleton) or the hard outer envelope of insects (exoskeleton or dermoskeleton).	BP	1.36982e-05	87	517	170688	1602382	0.00239746	134701	RIPPLY2
bp.265	GO:0001501	skeletal system development	The process whose specific outcome is the progression of the skeleton over time, from its formation to the mature structure. The skeleton is the bony framework of the body in vertebrates (endoskeleton) or the hard outer envelope of insects (exoskeleton or dermoskeleton).	BP	1.36982e-05	87	517	170688	1602382	0.00239746	7157	TP53
bp.266	GO:0001501	skeletal system development	The process whose specific outcome is the progression of the skeleton over time, from its formation to the mature structure. The skeleton is the bony framework of the body in vertebrates (endoskeleton) or the hard outer envelope of insects (exoskeleton or dermoskeleton).	BP	1.36982e-05	87	517	170688	1602382	0.00239746	53	ACP2
bp.267	GO:0001501	skeletal system development	The process whose specific outcome is the progression of the skeleton over time, from its formation to the mature structure. The skeleton is the bony framework of the body in vertebrates (endoskeleton) or the hard outer envelope of insects (exoskeleton or dermoskeleton).	BP	1.36982e-05	87	517	170688	1602382	0.00239746	3219	HOXB9
bp.268	GO:0001501	skeletal system development	The process whose specific outcome is the progression of the skeleton over time, from its formation to the mature structure. The skeleton is the bony framework of the body in vertebrates (endoskeleton) or the hard outer envelope of insects (exoskeleton or dermoskeleton).	BP	1.36982e-05	87	517	170688	1602382	0.00239746	4665	NAB2
bp.269	GO:0001501	skeletal system development	The process whose specific outcome is the progression of the skeleton over time, from its formation to the mature structure. The skeleton is the bony framework of the body in vertebrates (endoskeleton) or the hard outer envelope of insects (exoskeleton or dermoskeleton).	BP	1.36982e-05	87	517	170688	1602382	0.00239746	25946	ZNF385A
bp.270	GO:0001501	skeletal system development	The process whose specific outcome is the progression of the skeleton over time, from its formation to the mature structure. The skeleton is the bony framework of the body in vertebrates (endoskeleton) or the hard outer envelope of insects (exoskeleton or dermoskeleton).	BP	1.36982e-05	87	517	170688	1602382	0.00239746	5364	PLXNB1
bp.271	GO:0001501	skeletal system development	The process whose specific outcome is the progression of the skeleton over time, from its formation to the mature structure. The skeleton is the bony framework of the body in vertebrates (endoskeleton) or the hard outer envelope of insects (exoskeleton or dermoskeleton).	BP	1.36982e-05	87	517	170688	1602382	0.00239746	79633	FAT4
bp.272	GO:0001501	skeletal system development	The process whose specific outcome is the progression of the skeleton over time, from its formation to the mature structure. The skeleton is the bony framework of the body in vertebrates (endoskeleton) or the hard outer envelope of insects (exoskeleton or dermoskeleton).	BP	1.36982e-05	87	517	170688	1602382	0.00239746	6862	T
bp.273	GO:0001501	skeletal system development	The process whose specific outcome is the progression of the skeleton over time, from its formation to the mature structure. The skeleton is the bony framework of the body in vertebrates (endoskeleton) or the hard outer envelope of insects (exoskeleton or dermoskeleton).	BP	1.36982e-05	87	517	170688	1602382	0.00239746	23169	SLC35D1
bp.274	GO:0001501	skeletal system development	The process whose specific outcome is the progression of the skeleton over time, from its formation to the mature structure. The skeleton is the bony framework of the body in vertebrates (endoskeleton) or the hard outer envelope of insects (exoskeleton or dermoskeleton).	BP	1.36982e-05	87	517	170688	1602382	0.00239746	3202	HOXA5
bp.275	GO:0001501	skeletal system development	The process whose specific outcome is the progression of the skeleton over time, from its formation to the mature structure. The skeleton is the bony framework of the body in vertebrates (endoskeleton) or the hard outer envelope of insects (exoskeleton or dermoskeleton).	BP	1.36982e-05	87	517	170688	1602382	0.00239746	5777	PTPN6
bp.276	GO:0001501	skeletal system development	The process whose specific outcome is the progression of the skeleton over time, from its formation to the mature structure. The skeleton is the bony framework of the body in vertebrates (endoskeleton) or the hard outer envelope of insects (exoskeleton or dermoskeleton).	BP	1.36982e-05	87	517	170688	1602382	0.00239746	1305	COL13A1
bp.277	GO:0001501	skeletal system development	The process whose specific outcome is the progression of the skeleton over time, from its formation to the mature structure. The skeleton is the bony framework of the body in vertebrates (endoskeleton) or the hard outer envelope of insects (exoskeleton or dermoskeleton).	BP	1.36982e-05	87	517	170688	1602382	0.00239746	3714	JAG2
bp.278	GO:0001501	skeletal system development	The process whose specific outcome is the progression of the skeleton over time, from its formation to the mature structure. The skeleton is the bony framework of the body in vertebrates (endoskeleton) or the hard outer envelope of insects (exoskeleton or dermoskeleton).	BP	1.36982e-05	87	517	170688	1602382	0.00239746	10163	WASF2
bp.279	GO:0001501	skeletal system development	The process whose specific outcome is the progression of the skeleton over time, from its formation to the mature structure. The skeleton is the bony framework of the body in vertebrates (endoskeleton) or the hard outer envelope of insects (exoskeleton or dermoskeleton).	BP	1.36982e-05	87	517	170688	1602382	0.00239746	10269	ZMPSTE24
bp.280	GO:0001501	skeletal system development	The process whose specific outcome is the progression of the skeleton over time, from its formation to the mature structure. The skeleton is the bony framework of the body in vertebrates (endoskeleton) or the hard outer envelope of insects (exoskeleton or dermoskeleton).	BP	1.36982e-05	87	517	170688	1602382	0.00239746	5079	PAX5
bp.281	GO:0001501	skeletal system development	The process whose specific outcome is the progression of the skeleton over time, from its formation to the mature structure. The skeleton is the bony framework of the body in vertebrates (endoskeleton) or the hard outer envelope of insects (exoskeleton or dermoskeleton).	BP	1.36982e-05	87	517	170688	1602382	0.00239746	4040	LRP6
bp.282	GO:0001501	skeletal system development	The process whose specific outcome is the progression of the skeleton over time, from its formation to the mature structure. The skeleton is the bony framework of the body in vertebrates (endoskeleton) or the hard outer envelope of insects (exoskeleton or dermoskeleton).	BP	1.36982e-05	87	517	170688	1602382	0.00239746	7474	WNT5A
bp.283	GO:0001501	skeletal system development	The process whose specific outcome is the progression of the skeleton over time, from its formation to the mature structure. The skeleton is the bony framework of the body in vertebrates (endoskeleton) or the hard outer envelope of insects (exoskeleton or dermoskeleton).	BP	1.36982e-05	87	517	170688	1602382	0.00239746	1893	ECM1
bp.284	GO:0001501	skeletal system development	The process whose specific outcome is the progression of the skeleton over time, from its formation to the mature structure. The skeleton is the bony framework of the body in vertebrates (endoskeleton) or the hard outer envelope of insects (exoskeleton or dermoskeleton).	BP	1.36982e-05	87	517	170688	1602382	0.00239746	2114	ETS2
bp.285	GO:0001501	skeletal system development	The process whose specific outcome is the progression of the skeleton over time, from its formation to the mature structure. The skeleton is the bony framework of the body in vertebrates (endoskeleton) or the hard outer envelope of insects (exoskeleton or dermoskeleton).	BP	1.36982e-05	87	517	170688	1602382	0.00239746	5125	PCSK5
bp.286	GO:0001501	skeletal system development	The process whose specific outcome is the progression of the skeleton over time, from its formation to the mature structure. The skeleton is the bony framework of the body in vertebrates (endoskeleton) or the hard outer envelope of insects (exoskeleton or dermoskeleton).	BP	1.36982e-05	87	517	170688	1602382	0.00239746	3201	HOXA4
bp.287	GO:0001501	skeletal system development	The process whose specific outcome is the progression of the skeleton over time, from its formation to the mature structure. The skeleton is the bony framework of the body in vertebrates (endoskeleton) or the hard outer envelope of insects (exoskeleton or dermoskeleton).	BP	1.36982e-05	87	517	170688	1602382	0.00239746	389058	SP5
bp.288	GO:0001501	skeletal system development	The process whose specific outcome is the progression of the skeleton over time, from its formation to the mature structure. The skeleton is the bony framework of the body in vertebrates (endoskeleton) or the hard outer envelope of insects (exoskeleton or dermoskeleton).	BP	1.36982e-05	87	517	170688	1602382	0.00239746	3199	HOXA2
bp.289	GO:0001501	skeletal system development	The process whose specific outcome is the progression of the skeleton over time, from its formation to the mature structure. The skeleton is the bony framework of the body in vertebrates (endoskeleton) or the hard outer envelope of insects (exoskeleton or dermoskeleton).	BP	1.36982e-05	87	517	170688	1602382	0.00239746	285590	SH3PXD2B
bp.290	GO:0001501	skeletal system development	The process whose specific outcome is the progression of the skeleton over time, from its formation to the mature structure. The skeleton is the bony framework of the body in vertebrates (endoskeleton) or the hard outer envelope of insects (exoskeleton or dermoskeleton).	BP	1.36982e-05	87	517	170688	1602382	0.00239746	3037	HAS2
bp.291	GO:0001756	somitogenesis	The formation of mesodermal clusters that are arranged segmentally along the anterior posterior axis of an embryo.	BP	9.63393e-10	27	70	170688	1602382	1.71985e-06	5591	PRKDC
bp.292	GO:0001756	somitogenesis	The formation of mesodermal clusters that are arranged segmentally along the anterior posterior axis of an embryo.	BP	9.63393e-10	27	70	170688	1602382	1.71985e-06	4222	MEOX1
bp.293	GO:0001756	somitogenesis	The formation of mesodermal clusters that are arranged segmentally along the anterior posterior axis of an embryo.	BP	9.63393e-10	27	70	170688	1602382	1.71985e-06	134701	RIPPLY2
bp.294	GO:0001756	somitogenesis	The formation of mesodermal clusters that are arranged segmentally along the anterior posterior axis of an embryo.	BP	9.63393e-10	27	70	170688	1602382	1.71985e-06	85407	NKD1
bp.295	GO:0001756	somitogenesis	The formation of mesodermal clusters that are arranged segmentally along the anterior posterior axis of an embryo.	BP	9.63393e-10	27	70	170688	1602382	1.71985e-06	92129	RIPPLY1
bp.296	GO:0001756	somitogenesis	The formation of mesodermal clusters that are arranged segmentally along the anterior posterior axis of an embryo.	BP	9.63393e-10	27	70	170688	1602382	1.71985e-06	145873	MESP2
bp.297	GO:0001756	somitogenesis	The formation of mesodermal clusters that are arranged segmentally along the anterior posterior axis of an embryo.	BP	9.63393e-10	27	70	170688	1602382	1.71985e-06	1045	CDX2
bp.298	GO:0001756	somitogenesis	The formation of mesodermal clusters that are arranged segmentally along the anterior posterior axis of an embryo.	BP	9.63393e-10	27	70	170688	1602382	1.71985e-06	2294	FOXF1
bp.299	GO:0001756	somitogenesis	The formation of mesodermal clusters that are arranged segmentally along the anterior posterior axis of an embryo.	BP	9.63393e-10	27	70	170688	1602382	1.71985e-06	1044	CDX1
bp.300	GO:0001756	somitogenesis	The formation of mesodermal clusters that are arranged segmentally along the anterior posterior axis of an embryo.	BP	9.63393e-10	27	70	170688	1602382	1.71985e-06	22943	DKK1
bp.301	GO:0001756	somitogenesis	The formation of mesodermal clusters that are arranged segmentally along the anterior posterior axis of an embryo.	BP	9.63393e-10	27	70	170688	1602382	1.71985e-06	27023	FOXB1
bp.302	GO:0001756	somitogenesis	The formation of mesodermal clusters that are arranged segmentally along the anterior posterior axis of an embryo.	BP	9.63393e-10	27	70	170688	1602382	1.71985e-06	10683	DLL3
bp.303	GO:0001756	somitogenesis	The formation of mesodermal clusters that are arranged segmentally along the anterior posterior axis of an embryo.	BP	9.63393e-10	27	70	170688	1602382	1.71985e-06	7474	WNT5A
bp.304	GO:0001756	somitogenesis	The formation of mesodermal clusters that are arranged segmentally along the anterior posterior axis of an embryo.	BP	9.63393e-10	27	70	170688	1602382	1.71985e-06	6423	SFRP2
bp.305	GO:0001756	somitogenesis	The formation of mesodermal clusters that are arranged segmentally along the anterior posterior axis of an embryo.	BP	9.63393e-10	27	70	170688	1602382	1.71985e-06	343930	MSGN1
bp.306	GO:0001756	somitogenesis	The formation of mesodermal clusters that are arranged segmentally along the anterior posterior axis of an embryo.	BP	9.63393e-10	27	70	170688	1602382	1.71985e-06	6862	T
bp.307	GO:0001756	somitogenesis	The formation of mesodermal clusters that are arranged segmentally along the anterior posterior axis of an embryo.	BP	9.63393e-10	27	70	170688	1602382	1.71985e-06	4040	LRP6
bp.308	GO:0001756	somitogenesis	The formation of mesodermal clusters that are arranged segmentally along the anterior posterior axis of an embryo.	BP	9.63393e-10	27	70	170688	1602382	1.71985e-06	89780	WNT3A
bp.309	GO:0001756	somitogenesis	The formation of mesodermal clusters that are arranged segmentally along the anterior posterior axis of an embryo.	BP	9.63393e-10	27	70	170688	1602382	1.71985e-06	7157	TP53
bp.310	GO:0001756	somitogenesis	The formation of mesodermal clusters that are arranged segmentally along the anterior posterior axis of an embryo.	BP	9.63393e-10	27	70	170688	1602382	1.71985e-06	84667	HES7
bp.311	GO:0001756	somitogenesis	The formation of mesodermal clusters that are arranged segmentally along the anterior posterior axis of an embryo.	BP	9.63393e-10	27	70	170688	1602382	1.71985e-06	5100	PCDH8
bp.312	GO:0001756	somitogenesis	The formation of mesodermal clusters that are arranged segmentally along the anterior posterior axis of an embryo.	BP	9.63393e-10	27	70	170688	1602382	1.71985e-06	6911	TBX6
bp.313	GO:0001756	somitogenesis	The formation of mesodermal clusters that are arranged segmentally along the anterior posterior axis of an embryo.	BP	9.63393e-10	27	70	170688	1602382	1.71985e-06	55897	MESP1
bp.314	GO:0001756	somitogenesis	The formation of mesodermal clusters that are arranged segmentally along the anterior posterior axis of an embryo.	BP	9.63393e-10	27	70	170688	1602382	1.71985e-06	51176	LEF1
bp.315	GO:0001756	somitogenesis	The formation of mesodermal clusters that are arranged segmentally along the anterior posterior axis of an embryo.	BP	9.63393e-10	27	70	170688	1602382	1.71985e-06	4617	MYF5
bp.316	GO:0001756	somitogenesis	The formation of mesodermal clusters that are arranged segmentally along the anterior posterior axis of an embryo.	BP	9.63393e-10	27	70	170688	1602382	1.71985e-06	441478	NRARP
bp.317	GO:0001756	somitogenesis	The formation of mesodermal clusters that are arranged segmentally along the anterior posterior axis of an embryo.	BP	9.63393e-10	27	70	170688	1602382	1.71985e-06	8313	AXIN2
bp.318	GO:0002009	morphogenesis of an epithelium	The process in which the anatomical structures of epithelia are generated and organized. An epithelium consists of closely packed cells arranged in one or more layers, that covers the outer surfaces of the body or lines any internal cavity or tube.	BP	6.37456e-05	89	554	170688	1602382	0.0076431	5692	PSMB4
bp.319	GO:0002009	morphogenesis of an epithelium	The process in which the anatomical structures of epithelia are generated and organized. An epithelium consists of closely packed cells arranged in one or more layers, that covers the outer surfaces of the body or lines any internal cavity or tube.	BP	6.37456e-05	89	554	170688	1602382	0.0076431	6654	SOS1
bp.320	GO:0002009	morphogenesis of an epithelium	The process in which the anatomical structures of epithelia are generated and organized. An epithelium consists of closely packed cells arranged in one or more layers, that covers the outer surfaces of the body or lines any internal cavity or tube.	BP	6.37456e-05	89	554	170688	1602382	0.0076431	655	BMP7
bp.321	GO:0002009	morphogenesis of an epithelium	The process in which the anatomical structures of epithelia are generated and organized. An epithelium consists of closely packed cells arranged in one or more layers, that covers the outer surfaces of the body or lines any internal cavity or tube.	BP	6.37456e-05	89	554	170688	1602382	0.0076431	5728	PTEN
bp.322	GO:0002009	morphogenesis of an epithelium	The process in which the anatomical structures of epithelia are generated and organized. An epithelium consists of closely packed cells arranged in one or more layers, that covers the outer surfaces of the body or lines any internal cavity or tube.	BP	6.37456e-05	89	554	170688	1602382	0.0076431	9353	SLIT2
bp.323	GO:0002009	morphogenesis of an epithelium	The process in which the anatomical structures of epithelia are generated and organized. An epithelium consists of closely packed cells arranged in one or more layers, that covers the outer surfaces of the body or lines any internal cavity or tube.	BP	6.37456e-05	89	554	170688	1602382	0.0076431	4192	MDK
bp.324	GO:0002009	morphogenesis of an epithelium	The process in which the anatomical structures of epithelia are generated and organized. An epithelium consists of closely packed cells arranged in one or more layers, that covers the outer surfaces of the body or lines any internal cavity or tube.	BP	6.37456e-05	89	554	170688	1602382	0.0076431	2294	FOXF1
bp.325	GO:0002009	morphogenesis of an epithelium	The process in which the anatomical structures of epithelia are generated and organized. An epithelium consists of closely packed cells arranged in one or more layers, that covers the outer surfaces of the body or lines any internal cavity or tube.	BP	6.37456e-05	89	554	170688	1602382	0.0076431	79191	IRX3
bp.326	GO:0002009	morphogenesis of an epithelium	The process in which the anatomical structures of epithelia are generated and organized. An epithelium consists of closely packed cells arranged in one or more layers, that covers the outer surfaces of the body or lines any internal cavity or tube.	BP	6.37456e-05	89	554	170688	1602382	0.0076431	51176	LEF1
bp.327	GO:0002009	morphogenesis of an epithelium	The process in which the anatomical structures of epithelia are generated and organized. An epithelium consists of closely packed cells arranged in one or more layers, that covers the outer surfaces of the body or lines any internal cavity or tube.	BP	6.37456e-05	89	554	170688	1602382	0.0076431	11331	PHB2
bp.328	GO:0002009	morphogenesis of an epithelium	The process in which the anatomical structures of epithelia are generated and organized. An epithelium consists of closely packed cells arranged in one or more layers, that covers the outer surfaces of the body or lines any internal cavity or tube.	BP	6.37456e-05	89	554	170688	1602382	0.0076431	1948	EFNB2
bp.329	GO:0002009	morphogenesis of an epithelium	The process in which the anatomical structures of epithelia are generated and organized. An epithelium consists of closely packed cells arranged in one or more layers, that covers the outer surfaces of the body or lines any internal cavity or tube.	BP	6.37456e-05	89	554	170688	1602382	0.0076431	80000	GREB1L
bp.330	GO:0002009	morphogenesis of an epithelium	The process in which the anatomical structures of epithelia are generated and organized. An epithelium consists of closely packed cells arranged in one or more layers, that covers the outer surfaces of the body or lines any internal cavity or tube.	BP	6.37456e-05	89	554	170688	1602382	0.0076431	79633	FAT4
bp.331	GO:0002009	morphogenesis of an epithelium	The process in which the anatomical structures of epithelia are generated and organized. An epithelium consists of closely packed cells arranged in one or more layers, that covers the outer surfaces of the body or lines any internal cavity or tube.	BP	6.37456e-05	89	554	170688	1602382	0.0076431	23616	SH3BP1
bp.332	GO:0002009	morphogenesis of an epithelium	The process in which the anatomical structures of epithelia are generated and organized. An epithelium consists of closely packed cells arranged in one or more layers, that covers the outer surfaces of the body or lines any internal cavity or tube.	BP	6.37456e-05	89	554	170688	1602382	0.0076431	3214	HOXB4
bp.333	GO:0002009	morphogenesis of an epithelium	The process in which the anatomical structures of epithelia are generated and organized. An epithelium consists of closely packed cells arranged in one or more layers, that covers the outer surfaces of the body or lines any internal cavity or tube.	BP	6.37456e-05	89	554	170688	1602382	0.0076431	84678	KDM2B
bp.334	GO:0002009	morphogenesis of an epithelium	The process in which the anatomical structures of epithelia are generated and organized. An epithelium consists of closely packed cells arranged in one or more layers, that covers the outer surfaces of the body or lines any internal cavity or tube.	BP	6.37456e-05	89	554	170688	1602382	0.0076431	5686	PSMA5
bp.335	GO:0002009	morphogenesis of an epithelium	The process in which the anatomical structures of epithelia are generated and organized. An epithelium consists of closely packed cells arranged in one or more layers, that covers the outer surfaces of the body or lines any internal cavity or tube.	BP	6.37456e-05	89	554	170688	1602382	0.0076431	23245	ASTN2
bp.336	GO:0002009	morphogenesis of an epithelium	The process in which the anatomical structures of epithelia are generated and organized. An epithelium consists of closely packed cells arranged in one or more layers, that covers the outer surfaces of the body or lines any internal cavity or tube.	BP	6.37456e-05	89	554	170688	1602382	0.0076431	80144	FRAS1
bp.337	GO:0002009	morphogenesis of an epithelium	The process in which the anatomical structures of epithelia are generated and organized. An epithelium consists of closely packed cells arranged in one or more layers, that covers the outer surfaces of the body or lines any internal cavity or tube.	BP	6.37456e-05	89	554	170688	1602382	0.0076431	6862	T
bp.338	GO:0002009	morphogenesis of an epithelium	The process in which the anatomical structures of epithelia are generated and organized. An epithelium consists of closely packed cells arranged in one or more layers, that covers the outer surfaces of the body or lines any internal cavity or tube.	BP	6.37456e-05	89	554	170688	1602382	0.0076431	57822	GRHL3
bp.339	GO:0002009	morphogenesis of an epithelium	The process in which the anatomical structures of epithelia are generated and organized. An epithelium consists of closely packed cells arranged in one or more layers, that covers the outer surfaces of the body or lines any internal cavity or tube.	BP	6.37456e-05	89	554	170688	1602382	0.0076431	23213	SULF1
bp.340	GO:0002009	morphogenesis of an epithelium	The process in which the anatomical structures of epithelia are generated and organized. An epithelium consists of closely packed cells arranged in one or more layers, that covers the outer surfaces of the body or lines any internal cavity or tube.	BP	6.37456e-05	89	554	170688	1602382	0.0076431	6423	SFRP2
bp.341	GO:0002009	morphogenesis of an epithelium	The process in which the anatomical structures of epithelia are generated and organized. An epithelium consists of closely packed cells arranged in one or more layers, that covers the outer surfaces of the body or lines any internal cavity or tube.	BP	6.37456e-05	89	554	170688	1602382	0.0076431	441478	NRARP
bp.342	GO:0002009	morphogenesis of an epithelium	The process in which the anatomical structures of epithelia are generated and organized. An epithelium consists of closely packed cells arranged in one or more layers, that covers the outer surfaces of the body or lines any internal cavity or tube.	BP	6.37456e-05	89	554	170688	1602382	0.0076431	85407	NKD1
bp.343	GO:0002009	morphogenesis of an epithelium	The process in which the anatomical structures of epithelia are generated and organized. An epithelium consists of closely packed cells arranged in one or more layers, that covers the outer surfaces of the body or lines any internal cavity or tube.	BP	6.37456e-05	89	554	170688	1602382	0.0076431	131405	TRIM71
bp.344	GO:0002009	morphogenesis of an epithelium	The process in which the anatomical structures of epithelia are generated and organized. An epithelium consists of closely packed cells arranged in one or more layers, that covers the outer surfaces of the body or lines any internal cavity or tube.	BP	6.37456e-05	89	554	170688	1602382	0.0076431	23332	CLASP1
bp.345	GO:0002009	morphogenesis of an epithelium	The process in which the anatomical structures of epithelia are generated and organized. An epithelium consists of closely packed cells arranged in one or more layers, that covers the outer surfaces of the body or lines any internal cavity or tube.	BP	6.37456e-05	89	554	170688	1602382	0.0076431	80199	FUZ
bp.346	GO:0002009	morphogenesis of an epithelium	The process in which the anatomical structures of epithelia are generated and organized. An epithelium consists of closely packed cells arranged in one or more layers, that covers the outer surfaces of the body or lines any internal cavity or tube.	BP	6.37456e-05	89	554	170688	1602382	0.0076431	4435	CITED1
bp.347	GO:0002009	morphogenesis of an epithelium	The process in which the anatomical structures of epithelia are generated and organized. An epithelium consists of closely packed cells arranged in one or more layers, that covers the outer surfaces of the body or lines any internal cavity or tube.	BP	6.37456e-05	89	554	170688	1602382	0.0076431	5100	PCDH8
bp.348	GO:0002009	morphogenesis of an epithelium	The process in which the anatomical structures of epithelia are generated and organized. An epithelium consists of closely packed cells arranged in one or more layers, that covers the outer surfaces of the body or lines any internal cavity or tube.	BP	6.37456e-05	89	554	170688	1602382	0.0076431	1175	AP2S1
bp.349	GO:0002009	morphogenesis of an epithelium	The process in which the anatomical structures of epithelia are generated and organized. An epithelium consists of closely packed cells arranged in one or more layers, that covers the outer surfaces of the body or lines any internal cavity or tube.	BP	6.37456e-05	89	554	170688	1602382	0.0076431	23767	FLRT3
bp.350	GO:0002009	morphogenesis of an epithelium	The process in which the anatomical structures of epithelia are generated and organized. An epithelium consists of closely packed cells arranged in one or more layers, that covers the outer surfaces of the body or lines any internal cavity or tube.	BP	6.37456e-05	89	554	170688	1602382	0.0076431	84446	BRSK1
bp.351	GO:0002009	morphogenesis of an epithelium	The process in which the anatomical structures of epithelia are generated and organized. An epithelium consists of closely packed cells arranged in one or more layers, that covers the outer surfaces of the body or lines any internal cavity or tube.	BP	6.37456e-05	89	554	170688	1602382	0.0076431	4233	MET
bp.352	GO:0002009	morphogenesis of an epithelium	The process in which the anatomical structures of epithelia are generated and organized. An epithelium consists of closely packed cells arranged in one or more layers, that covers the outer surfaces of the body or lines any internal cavity or tube.	BP	6.37456e-05	89	554	170688	1602382	0.0076431	9723	SEMA3E
bp.353	GO:0002009	morphogenesis of an epithelium	The process in which the anatomical structures of epithelia are generated and organized. An epithelium consists of closely packed cells arranged in one or more layers, that covers the outer surfaces of the body or lines any internal cavity or tube.	BP	6.37456e-05	89	554	170688	1602382	0.0076431	4609	MYC
bp.354	GO:0002009	morphogenesis of an epithelium	The process in which the anatomical structures of epithelia are generated and organized. An epithelium consists of closely packed cells arranged in one or more layers, that covers the outer surfaces of the body or lines any internal cavity or tube.	BP	6.37456e-05	89	554	170688	1602382	0.0076431	3202	HOXA5
bp.355	GO:0002009	morphogenesis of an epithelium	The process in which the anatomical structures of epithelia are generated and organized. An epithelium consists of closely packed cells arranged in one or more layers, that covers the outer surfaces of the body or lines any internal cavity or tube.	BP	6.37456e-05	89	554	170688	1602382	0.0076431	6591	SNAI2
bp.356	GO:0002009	morphogenesis of an epithelium	The process in which the anatomical structures of epithelia are generated and organized. An epithelium consists of closely packed cells arranged in one or more layers, that covers the outer surfaces of the body or lines any internal cavity or tube.	BP	6.37456e-05	89	554	170688	1602382	0.0076431	9585	KIF20B
bp.357	GO:0002009	morphogenesis of an epithelium	The process in which the anatomical structures of epithelia are generated and organized. An epithelium consists of closely packed cells arranged in one or more layers, that covers the outer surfaces of the body or lines any internal cavity or tube.	BP	6.37456e-05	89	554	170688	1602382	0.0076431	5914	RARA
bp.358	GO:0002009	morphogenesis of an epithelium	The process in which the anatomical structures of epithelia are generated and organized. An epithelium consists of closely packed cells arranged in one or more layers, that covers the outer surfaces of the body or lines any internal cavity or tube.	BP	6.37456e-05	89	554	170688	1602382	0.0076431	5691	PSMB3
bp.359	GO:0002009	morphogenesis of an epithelium	The process in which the anatomical structures of epithelia are generated and organized. An epithelium consists of closely packed cells arranged in one or more layers, that covers the outer surfaces of the body or lines any internal cavity or tube.	BP	6.37456e-05	89	554	170688	1602382	0.0076431	2637	GBX2
bp.360	GO:0002009	morphogenesis of an epithelium	The process in which the anatomical structures of epithelia are generated and organized. An epithelium consists of closely packed cells arranged in one or more layers, that covers the outer surfaces of the body or lines any internal cavity or tube.	BP	6.37456e-05	89	554	170688	1602382	0.0076431	11019	LIAS
bp.361	GO:0002009	morphogenesis of an epithelium	The process in which the anatomical structures of epithelia are generated and organized. An epithelium consists of closely packed cells arranged in one or more layers, that covers the outer surfaces of the body or lines any internal cavity or tube.	BP	6.37456e-05	89	554	170688	1602382	0.0076431	8945	BTRC
bp.362	GO:0002009	morphogenesis of an epithelium	The process in which the anatomical structures of epithelia are generated and organized. An epithelium consists of closely packed cells arranged in one or more layers, that covers the outer surfaces of the body or lines any internal cavity or tube.	BP	6.37456e-05	89	554	170688	1602382	0.0076431	2626	GATA4
bp.363	GO:0002009	morphogenesis of an epithelium	The process in which the anatomical structures of epithelia are generated and organized. An epithelium consists of closely packed cells arranged in one or more layers, that covers the outer surfaces of the body or lines any internal cavity or tube.	BP	6.37456e-05	89	554	170688	1602382	0.0076431	22943	DKK1
bp.364	GO:0002009	morphogenesis of an epithelium	The process in which the anatomical structures of epithelia are generated and organized. An epithelium consists of closely packed cells arranged in one or more layers, that covers the outer surfaces of the body or lines any internal cavity or tube.	BP	6.37456e-05	89	554	170688	1602382	0.0076431	5714	PSMD8
bp.365	GO:0002009	morphogenesis of an epithelium	The process in which the anatomical structures of epithelia are generated and organized. An epithelium consists of closely packed cells arranged in one or more layers, that covers the outer surfaces of the body or lines any internal cavity or tube.	BP	6.37456e-05	89	554	170688	1602382	0.0076431	6495	SIX1
bp.366	GO:0002009	morphogenesis of an epithelium	The process in which the anatomical structures of epithelia are generated and organized. An epithelium consists of closely packed cells arranged in one or more layers, that covers the outer surfaces of the body or lines any internal cavity or tube.	BP	6.37456e-05	89	554	170688	1602382	0.0076431	94134	ARHGAP12
bp.367	GO:0002009	morphogenesis of an epithelium	The process in which the anatomical structures of epithelia are generated and organized. An epithelium consists of closely packed cells arranged in one or more layers, that covers the outer surfaces of the body or lines any internal cavity or tube.	BP	6.37456e-05	89	554	170688	1602382	0.0076431	3212	HOXB2
bp.368	GO:0002009	morphogenesis of an epithelium	The process in which the anatomical structures of epithelia are generated and organized. An epithelium consists of closely packed cells arranged in one or more layers, that covers the outer surfaces of the body or lines any internal cavity or tube.	BP	6.37456e-05	89	554	170688	1602382	0.0076431	8289	ARID1A
bp.369	GO:0002009	morphogenesis of an epithelium	The process in which the anatomical structures of epithelia are generated and organized. An epithelium consists of closely packed cells arranged in one or more layers, that covers the outer surfaces of the body or lines any internal cavity or tube.	BP	6.37456e-05	89	554	170688	1602382	0.0076431	4300	MLLT3
bp.370	GO:0002009	morphogenesis of an epithelium	The process in which the anatomical structures of epithelia are generated and organized. An epithelium consists of closely packed cells arranged in one or more layers, that covers the outer surfaces of the body or lines any internal cavity or tube.	BP	6.37456e-05	89	554	170688	1602382	0.0076431	57167	SALL4
bp.371	GO:0002009	morphogenesis of an epithelium	The process in which the anatomical structures of epithelia are generated and organized. An epithelium consists of closely packed cells arranged in one or more layers, that covers the outer surfaces of the body or lines any internal cavity or tube.	BP	6.37456e-05	89	554	170688	1602382	0.0076431	10253	SPRY2
bp.372	GO:0002009	morphogenesis of an epithelium	The process in which the anatomical structures of epithelia are generated and organized. An epithelium consists of closely packed cells arranged in one or more layers, that covers the outer surfaces of the body or lines any internal cavity or tube.	BP	6.37456e-05	89	554	170688	1602382	0.0076431	4919	ROR1
bp.373	GO:0002009	morphogenesis of an epithelium	The process in which the anatomical structures of epithelia are generated and organized. An epithelium consists of closely packed cells arranged in one or more layers, that covers the outer surfaces of the body or lines any internal cavity or tube.	BP	6.37456e-05	89	554	170688	1602382	0.0076431	317	APAF1
bp.374	GO:0002009	morphogenesis of an epithelium	The process in which the anatomical structures of epithelia are generated and organized. An epithelium consists of closely packed cells arranged in one or more layers, that covers the outer surfaces of the body or lines any internal cavity or tube.	BP	6.37456e-05	89	554	170688	1602382	0.0076431	84962	AJUBA
bp.375	GO:0002009	morphogenesis of an epithelium	The process in which the anatomical structures of epithelia are generated and organized. An epithelium consists of closely packed cells arranged in one or more layers, that covers the outer surfaces of the body or lines any internal cavity or tube.	BP	6.37456e-05	89	554	170688	1602382	0.0076431	3280	HES1
bp.376	GO:0002009	morphogenesis of an epithelium	The process in which the anatomical structures of epithelia are generated and organized. An epithelium consists of closely packed cells arranged in one or more layers, that covers the outer surfaces of the body or lines any internal cavity or tube.	BP	6.37456e-05	89	554	170688	1602382	0.0076431	5754	PTK7
bp.377	GO:0002009	morphogenesis of an epithelium	The process in which the anatomical structures of epithelia are generated and organized. An epithelium consists of closely packed cells arranged in one or more layers, that covers the outer surfaces of the body or lines any internal cavity or tube.	BP	6.37456e-05	89	554	170688	1602382	0.0076431	2260	FGFR1
bp.378	GO:0002009	morphogenesis of an epithelium	The process in which the anatomical structures of epithelia are generated and organized. An epithelium consists of closely packed cells arranged in one or more layers, that covers the outer surfaces of the body or lines any internal cavity or tube.	BP	6.37456e-05	89	554	170688	1602382	0.0076431	4040	LRP6
bp.379	GO:0002009	morphogenesis of an epithelium	The process in which the anatomical structures of epithelia are generated and organized. An epithelium consists of closely packed cells arranged in one or more layers, that covers the outer surfaces of the body or lines any internal cavity or tube.	BP	6.37456e-05	89	554	170688	1602382	0.0076431	2625	GATA3
bp.380	GO:0002009	morphogenesis of an epithelium	The process in which the anatomical structures of epithelia are generated and organized. An epithelium consists of closely packed cells arranged in one or more layers, that covers the outer surfaces of the body or lines any internal cavity or tube.	BP	6.37456e-05	89	554	170688	1602382	0.0076431	10413	YAP1
bp.381	GO:0002009	morphogenesis of an epithelium	The process in which the anatomical structures of epithelia are generated and organized. An epithelium consists of closely packed cells arranged in one or more layers, that covers the outer surfaces of the body or lines any internal cavity or tube.	BP	6.37456e-05	89	554	170688	1602382	0.0076431	10116	FEM1B
bp.382	GO:0002009	morphogenesis of an epithelium	The process in which the anatomical structures of epithelia are generated and organized. An epithelium consists of closely packed cells arranged in one or more layers, that covers the outer surfaces of the body or lines any internal cavity or tube.	BP	6.37456e-05	89	554	170688	1602382	0.0076431	89780	WNT3A
bp.383	GO:0002009	morphogenesis of an epithelium	The process in which the anatomical structures of epithelia are generated and organized. An epithelium consists of closely packed cells arranged in one or more layers, that covers the outer surfaces of the body or lines any internal cavity or tube.	BP	6.37456e-05	89	554	170688	1602382	0.0076431	8321	FZD1
bp.384	GO:0002009	morphogenesis of an epithelium	The process in which the anatomical structures of epithelia are generated and organized. An epithelium consists of closely packed cells arranged in one or more layers, that covers the outer surfaces of the body or lines any internal cavity or tube.	BP	6.37456e-05	89	554	170688	1602382	0.0076431	5076	PAX2
bp.385	GO:0002009	morphogenesis of an epithelium	The process in which the anatomical structures of epithelia are generated and organized. An epithelium consists of closely packed cells arranged in one or more layers, that covers the outer surfaces of the body or lines any internal cavity or tube.	BP	6.37456e-05	89	554	170688	1602382	0.0076431	7248	TSC1
bp.386	GO:0002009	morphogenesis of an epithelium	The process in which the anatomical structures of epithelia are generated and organized. An epithelium consists of closely packed cells arranged in one or more layers, that covers the outer surfaces of the body or lines any internal cavity or tube.	BP	6.37456e-05	89	554	170688	1602382	0.0076431	7474	WNT5A
bp.387	GO:0002009	morphogenesis of an epithelium	The process in which the anatomical structures of epithelia are generated and organized. An epithelium consists of closely packed cells arranged in one or more layers, that covers the outer surfaces of the body or lines any internal cavity or tube.	BP	6.37456e-05	89	554	170688	1602382	0.0076431	83852	SETDB2
bp.388	GO:0002009	morphogenesis of an epithelium	The process in which the anatomical structures of epithelia are generated and organized. An epithelium consists of closely packed cells arranged in one or more layers, that covers the outer surfaces of the body or lines any internal cavity or tube.	BP	6.37456e-05	89	554	170688	1602382	0.0076431	5715	PSMD9
bp.389	GO:0002009	morphogenesis of an epithelium	The process in which the anatomical structures of epithelia are generated and organized. An epithelium consists of closely packed cells arranged in one or more layers, that covers the outer surfaces of the body or lines any internal cavity or tube.	BP	6.37456e-05	89	554	170688	1602382	0.0076431	1289	COL5A1
bp.390	GO:0002009	morphogenesis of an epithelium	The process in which the anatomical structures of epithelia are generated and organized. An epithelium consists of closely packed cells arranged in one or more layers, that covers the outer surfaces of the body or lines any internal cavity or tube.	BP	6.37456e-05	89	554	170688	1602382	0.0076431	84283	TMEM79
bp.391	GO:0002009	morphogenesis of an epithelium	The process in which the anatomical structures of epithelia are generated and organized. An epithelium consists of closely packed cells arranged in one or more layers, that covers the outer surfaces of the body or lines any internal cavity or tube.	BP	6.37456e-05	89	554	170688	1602382	0.0076431	5707	PSMD1
bp.392	GO:0002009	morphogenesis of an epithelium	The process in which the anatomical structures of epithelia are generated and organized. An epithelium consists of closely packed cells arranged in one or more layers, that covers the outer surfaces of the body or lines any internal cavity or tube.	BP	6.37456e-05	89	554	170688	1602382	0.0076431	1861	TOR1A
bp.393	GO:0002009	morphogenesis of an epithelium	The process in which the anatomical structures of epithelia are generated and organized. An epithelium consists of closely packed cells arranged in one or more layers, that covers the outer surfaces of the body or lines any internal cavity or tube.	BP	6.37456e-05	89	554	170688	1602382	0.0076431	2535	FZD2
bp.394	GO:0002009	morphogenesis of an epithelium	The process in which the anatomical structures of epithelia are generated and organized. An epithelium consists of closely packed cells arranged in one or more layers, that covers the outer surfaces of the body or lines any internal cavity or tube.	BP	6.37456e-05	89	554	170688	1602382	0.0076431	55897	MESP1
bp.395	GO:0002009	morphogenesis of an epithelium	The process in which the anatomical structures of epithelia are generated and organized. An epithelium consists of closely packed cells arranged in one or more layers, that covers the outer surfaces of the body or lines any internal cavity or tube.	BP	6.37456e-05	89	554	170688	1602382	0.0076431	1951	CELSR3
bp.396	GO:0002009	morphogenesis of an epithelium	The process in which the anatomical structures of epithelia are generated and organized. An epithelium consists of closely packed cells arranged in one or more layers, that covers the outer surfaces of the body or lines any internal cavity or tube.	BP	6.37456e-05	89	554	170688	1602382	0.0076431	83478	ARHGAP24
bp.397	GO:0002009	morphogenesis of an epithelium	The process in which the anatomical structures of epithelia are generated and organized. An epithelium consists of closely packed cells arranged in one or more layers, that covers the outer surfaces of the body or lines any internal cavity or tube.	BP	6.37456e-05	89	554	170688	1602382	0.0076431	55966	AJAP1
bp.398	GO:0002009	morphogenesis of an epithelium	The process in which the anatomical structures of epithelia are generated and organized. An epithelium consists of closely packed cells arranged in one or more layers, that covers the outer surfaces of the body or lines any internal cavity or tube.	BP	6.37456e-05	89	554	170688	1602382	0.0076431	5695	PSMB7
bp.399	GO:0002009	morphogenesis of an epithelium	The process in which the anatomical structures of epithelia are generated and organized. An epithelium consists of closely packed cells arranged in one or more layers, that covers the outer surfaces of the body or lines any internal cavity or tube.	BP	6.37456e-05	89	554	170688	1602382	0.0076431	6926	TBX3
bp.400	GO:0002009	morphogenesis of an epithelium	The process in which the anatomical structures of epithelia are generated and organized. An epithelium consists of closely packed cells arranged in one or more layers, that covers the outer surfaces of the body or lines any internal cavity or tube.	BP	6.37456e-05	89	554	170688	1602382	0.0076431	3714	JAG2
bp.401	GO:0002009	morphogenesis of an epithelium	The process in which the anatomical structures of epithelia are generated and organized. An epithelium consists of closely packed cells arranged in one or more layers, that covers the outer surfaces of the body or lines any internal cavity or tube.	BP	6.37456e-05	89	554	170688	1602382	0.0076431	54345	SOX18
bp.402	GO:0002009	morphogenesis of an epithelium	The process in which the anatomical structures of epithelia are generated and organized. An epithelium consists of closely packed cells arranged in one or more layers, that covers the outer surfaces of the body or lines any internal cavity or tube.	BP	6.37456e-05	89	554	170688	1602382	0.0076431	8195	MKKS
bp.403	GO:0002009	morphogenesis of an epithelium	The process in which the anatomical structures of epithelia are generated and organized. An epithelium consists of closely packed cells arranged in one or more layers, that covers the outer surfaces of the body or lines any internal cavity or tube.	BP	6.37456e-05	89	554	170688	1602382	0.0076431	2255	FGF10
bp.404	GO:0002009	morphogenesis of an epithelium	The process in which the anatomical structures of epithelia are generated and organized. An epithelium consists of closely packed cells arranged in one or more layers, that covers the outer surfaces of the body or lines any internal cavity or tube.	BP	6.37456e-05	89	554	170688	1602382	0.0076431	7547	ZIC3
bp.405	GO:0002009	morphogenesis of an epithelium	The process in which the anatomical structures of epithelia are generated and organized. An epithelium consists of closely packed cells arranged in one or more layers, that covers the outer surfaces of the body or lines any internal cavity or tube.	BP	6.37456e-05	89	554	170688	1602382	0.0076431	6911	TBX6
bp.406	GO:0002009	morphogenesis of an epithelium	The process in which the anatomical structures of epithelia are generated and organized. An epithelium consists of closely packed cells arranged in one or more layers, that covers the outer surfaces of the body or lines any internal cavity or tube.	BP	6.37456e-05	89	554	170688	1602382	0.0076431	25932	CLIC4
bp.407	GO:0003002	regionalization	The pattern specification process that results in the subdivision of an axis or axes in space to define an area or volume in which specific patterns of cell differentiation will take place or in which cells interpret a specific environment.	BP	2.01674e-12	84	355	170688	1602382	9.00069e-09	6911	TBX6
bp.408	GO:0003002	regionalization	The pattern specification process that results in the subdivision of an axis or axes in space to define an area or volume in which specific patterns of cell differentiation will take place or in which cells interpret a specific environment.	BP	2.01674e-12	84	355	170688	1602382	9.00069e-09	3201	HOXA4
bp.409	GO:0003002	regionalization	The pattern specification process that results in the subdivision of an axis or axes in space to define an area or volume in which specific patterns of cell differentiation will take place or in which cells interpret a specific environment.	BP	2.01674e-12	84	355	170688	1602382	9.00069e-09	3199	HOXA2
bp.410	GO:0003002	regionalization	The pattern specification process that results in the subdivision of an axis or axes in space to define an area or volume in which specific patterns of cell differentiation will take place or in which cells interpret a specific environment.	BP	2.01674e-12	84	355	170688	1602382	9.00069e-09	57801	HES4
bp.411	GO:0003002	regionalization	The pattern specification process that results in the subdivision of an axis or axes in space to define an area or volume in which specific patterns of cell differentiation will take place or in which cells interpret a specific environment.	BP	2.01674e-12	84	355	170688	1602382	9.00069e-09	5125	PCSK5
bp.412	GO:0003002	regionalization	The pattern specification process that results in the subdivision of an axis or axes in space to define an area or volume in which specific patterns of cell differentiation will take place or in which cells interpret a specific environment.	BP	2.01674e-12	84	355	170688	1602382	9.00069e-09	7704	ZBTB16
bp.413	GO:0003002	regionalization	The pattern specification process that results in the subdivision of an axis or axes in space to define an area or volume in which specific patterns of cell differentiation will take place or in which cells interpret a specific environment.	BP	2.01674e-12	84	355	170688	1602382	9.00069e-09	2114	ETS2
bp.414	GO:0003002	regionalization	The pattern specification process that results in the subdivision of an axis or axes in space to define an area or volume in which specific patterns of cell differentiation will take place or in which cells interpret a specific environment.	BP	2.01674e-12	84	355	170688	1602382	9.00069e-09	7547	ZIC3
bp.415	GO:0003002	regionalization	The pattern specification process that results in the subdivision of an axis or axes in space to define an area or volume in which specific patterns of cell differentiation will take place or in which cells interpret a specific environment.	BP	2.01674e-12	84	355	170688	1602382	9.00069e-09	145873	MESP2
bp.416	GO:0003002	regionalization	The pattern specification process that results in the subdivision of an axis or axes in space to define an area or volume in which specific patterns of cell differentiation will take place or in which cells interpret a specific environment.	BP	2.01674e-12	84	355	170688	1602382	9.00069e-09	9350	CER1
bp.417	GO:0003002	regionalization	The pattern specification process that results in the subdivision of an axis or axes in space to define an area or volume in which specific patterns of cell differentiation will take place or in which cells interpret a specific environment.	BP	2.01674e-12	84	355	170688	1602382	9.00069e-09	4040	LRP6
bp.418	GO:0003002	regionalization	The pattern specification process that results in the subdivision of an axis or axes in space to define an area or volume in which specific patterns of cell differentiation will take place or in which cells interpret a specific environment.	BP	2.01674e-12	84	355	170688	1602382	9.00069e-09	2260	FGFR1
bp.419	GO:0003002	regionalization	The pattern specification process that results in the subdivision of an axis or axes in space to define an area or volume in which specific patterns of cell differentiation will take place or in which cells interpret a specific environment.	BP	2.01674e-12	84	355	170688	1602382	9.00069e-09	8553	BHLHE40
bp.420	GO:0003002	regionalization	The pattern specification process that results in the subdivision of an axis or axes in space to define an area or volume in which specific patterns of cell differentiation will take place or in which cells interpret a specific environment.	BP	2.01674e-12	84	355	170688	1602382	9.00069e-09	10683	DLL3
bp.421	GO:0003002	regionalization	The pattern specification process that results in the subdivision of an axis or axes in space to define an area or volume in which specific patterns of cell differentiation will take place or in which cells interpret a specific environment.	BP	2.01674e-12	84	355	170688	1602382	9.00069e-09	221833	SP8
bp.422	GO:0003002	regionalization	The pattern specification process that results in the subdivision of an axis or axes in space to define an area or volume in which specific patterns of cell differentiation will take place or in which cells interpret a specific environment.	BP	2.01674e-12	84	355	170688	1602382	9.00069e-09	84667	HES7
bp.423	GO:0003002	regionalization	The pattern specification process that results in the subdivision of an axis or axes in space to define an area or volume in which specific patterns of cell differentiation will take place or in which cells interpret a specific environment.	BP	2.01674e-12	84	355	170688	1602382	9.00069e-09	5089	PBX2
bp.424	GO:0003002	regionalization	The pattern specification process that results in the subdivision of an axis or axes in space to define an area or volume in which specific patterns of cell differentiation will take place or in which cells interpret a specific environment.	BP	2.01674e-12	84	355	170688	1602382	9.00069e-09	83852	SETDB2
bp.425	GO:0003002	regionalization	The pattern specification process that results in the subdivision of an axis or axes in space to define an area or volume in which specific patterns of cell differentiation will take place or in which cells interpret a specific environment.	BP	2.01674e-12	84	355	170688	1602382	9.00069e-09	2255	FGF10
bp.426	GO:0003002	regionalization	The pattern specification process that results in the subdivision of an axis or axes in space to define an area or volume in which specific patterns of cell differentiation will take place or in which cells interpret a specific environment.	BP	2.01674e-12	84	355	170688	1602382	9.00069e-09	4487	MSX1
bp.427	GO:0003002	regionalization	The pattern specification process that results in the subdivision of an axis or axes in space to define an area or volume in which specific patterns of cell differentiation will take place or in which cells interpret a specific environment.	BP	2.01674e-12	84	355	170688	1602382	9.00069e-09	5591	PRKDC
bp.428	GO:0003002	regionalization	The pattern specification process that results in the subdivision of an axis or axes in space to define an area or volume in which specific patterns of cell differentiation will take place or in which cells interpret a specific environment.	BP	2.01674e-12	84	355	170688	1602382	9.00069e-09	4300	MLLT3
bp.429	GO:0003002	regionalization	The pattern specification process that results in the subdivision of an axis or axes in space to define an area or volume in which specific patterns of cell differentiation will take place or in which cells interpret a specific environment.	BP	2.01674e-12	84	355	170688	1602382	9.00069e-09	57453	DSCAML1
bp.430	GO:0003002	regionalization	The pattern specification process that results in the subdivision of an axis or axes in space to define an area or volume in which specific patterns of cell differentiation will take place or in which cells interpret a specific environment.	BP	2.01674e-12	84	355	170688	1602382	9.00069e-09	6790	AURKA
bp.431	GO:0003002	regionalization	The pattern specification process that results in the subdivision of an axis or axes in space to define an area or volume in which specific patterns of cell differentiation will take place or in which cells interpret a specific environment.	BP	2.01674e-12	84	355	170688	1602382	9.00069e-09	3219	HOXB9
bp.432	GO:0003002	regionalization	The pattern specification process that results in the subdivision of an axis or axes in space to define an area or volume in which specific patterns of cell differentiation will take place or in which cells interpret a specific environment.	BP	2.01674e-12	84	355	170688	1602382	9.00069e-09	6423	SFRP2
bp.433	GO:0003002	regionalization	The pattern specification process that results in the subdivision of an axis or axes in space to define an area or volume in which specific patterns of cell differentiation will take place or in which cells interpret a specific environment.	BP	2.01674e-12	84	355	170688	1602382	9.00069e-09	390992	HES3
bp.434	GO:0003002	regionalization	The pattern specification process that results in the subdivision of an axis or axes in space to define an area or volume in which specific patterns of cell differentiation will take place or in which cells interpret a specific environment.	BP	2.01674e-12	84	355	170688	1602382	9.00069e-09	25911	DPCD
bp.435	GO:0003002	regionalization	The pattern specification process that results in the subdivision of an axis or axes in space to define an area or volume in which specific patterns of cell differentiation will take place or in which cells interpret a specific environment.	BP	2.01674e-12	84	355	170688	1602382	9.00069e-09	6862	T
bp.436	GO:0003002	regionalization	The pattern specification process that results in the subdivision of an axis or axes in space to define an area or volume in which specific patterns of cell differentiation will take place or in which cells interpret a specific environment.	BP	2.01674e-12	84	355	170688	1602382	9.00069e-09	10409	BASP1
bp.437	GO:0003002	regionalization	The pattern specification process that results in the subdivision of an axis or axes in space to define an area or volume in which specific patterns of cell differentiation will take place or in which cells interpret a specific environment.	BP	2.01674e-12	84	355	170688	1602382	9.00069e-09	4762	NEUROG1
bp.438	GO:0003002	regionalization	The pattern specification process that results in the subdivision of an axis or axes in space to define an area or volume in which specific patterns of cell differentiation will take place or in which cells interpret a specific environment.	BP	2.01674e-12	84	355	170688	1602382	9.00069e-09	2626	GATA4
bp.439	GO:0003002	regionalization	The pattern specification process that results in the subdivision of an axis or axes in space to define an area or volume in which specific patterns of cell differentiation will take place or in which cells interpret a specific environment.	BP	2.01674e-12	84	355	170688	1602382	9.00069e-09	3221	HOXC4
bp.440	GO:0003002	regionalization	The pattern specification process that results in the subdivision of an axis or axes in space to define an area or volume in which specific patterns of cell differentiation will take place or in which cells interpret a specific environment.	BP	2.01674e-12	84	355	170688	1602382	9.00069e-09	79191	IRX3
bp.441	GO:0003002	regionalization	The pattern specification process that results in the subdivision of an axis or axes in space to define an area or volume in which specific patterns of cell differentiation will take place or in which cells interpret a specific environment.	BP	2.01674e-12	84	355	170688	1602382	9.00069e-09	22943	DKK1
bp.442	GO:0003002	regionalization	The pattern specification process that results in the subdivision of an axis or axes in space to define an area or volume in which specific patterns of cell differentiation will take place or in which cells interpret a specific environment.	BP	2.01674e-12	84	355	170688	1602382	9.00069e-09	5100	PCDH8
bp.443	GO:0003002	regionalization	The pattern specification process that results in the subdivision of an axis or axes in space to define an area or volume in which specific patterns of cell differentiation will take place or in which cells interpret a specific environment.	BP	2.01674e-12	84	355	170688	1602382	9.00069e-09	7157	TP53
bp.444	GO:0003002	regionalization	The pattern specification process that results in the subdivision of an axis or axes in space to define an area or volume in which specific patterns of cell differentiation will take place or in which cells interpret a specific environment.	BP	2.01674e-12	84	355	170688	1602382	9.00069e-09	10370	CITED2
bp.445	GO:0003002	regionalization	The pattern specification process that results in the subdivision of an axis or axes in space to define an area or volume in which specific patterns of cell differentiation will take place or in which cells interpret a specific environment.	BP	2.01674e-12	84	355	170688	1602382	9.00069e-09	4222	MEOX1
bp.446	GO:0003002	regionalization	The pattern specification process that results in the subdivision of an axis or axes in space to define an area or volume in which specific patterns of cell differentiation will take place or in which cells interpret a specific environment.	BP	2.01674e-12	84	355	170688	1602382	9.00069e-09	389549	FEZF1
bp.447	GO:0003002	regionalization	The pattern specification process that results in the subdivision of an axis or axes in space to define an area or volume in which specific patterns of cell differentiation will take place or in which cells interpret a specific environment.	BP	2.01674e-12	84	355	170688	1602382	9.00069e-09	22823	MTF2
bp.448	GO:0003002	regionalization	The pattern specification process that results in the subdivision of an axis or axes in space to define an area or volume in which specific patterns of cell differentiation will take place or in which cells interpret a specific environment.	BP	2.01674e-12	84	355	170688	1602382	9.00069e-09	7474	WNT5A
bp.449	GO:0003002	regionalization	The pattern specification process that results in the subdivision of an axis or axes in space to define an area or volume in which specific patterns of cell differentiation will take place or in which cells interpret a specific environment.	BP	2.01674e-12	84	355	170688	1602382	9.00069e-09	51176	LEF1
bp.450	GO:0003002	regionalization	The pattern specification process that results in the subdivision of an axis or axes in space to define an area or volume in which specific patterns of cell differentiation will take place or in which cells interpret a specific environment.	BP	2.01674e-12	84	355	170688	1602382	9.00069e-09	28996	HIPK2
bp.451	GO:0003002	regionalization	The pattern specification process that results in the subdivision of an axis or axes in space to define an area or volume in which specific patterns of cell differentiation will take place or in which cells interpret a specific environment.	BP	2.01674e-12	84	355	170688	1602382	9.00069e-09	80199	FUZ
bp.452	GO:0003002	regionalization	The pattern specification process that results in the subdivision of an axis or axes in space to define an area or volume in which specific patterns of cell differentiation will take place or in which cells interpret a specific environment.	BP	2.01674e-12	84	355	170688	1602382	9.00069e-09	4825	NKX6-1
bp.453	GO:0003002	regionalization	The pattern specification process that results in the subdivision of an axis or axes in space to define an area or volume in which specific patterns of cell differentiation will take place or in which cells interpret a specific environment.	BP	2.01674e-12	84	355	170688	1602382	9.00069e-09	1649	DDIT3
bp.454	GO:0003002	regionalization	The pattern specification process that results in the subdivision of an axis or axes in space to define an area or volume in which specific patterns of cell differentiation will take place or in which cells interpret a specific environment.	BP	2.01674e-12	84	355	170688	1602382	9.00069e-09	85407	NKD1
bp.455	GO:0003002	regionalization	The pattern specification process that results in the subdivision of an axis or axes in space to define an area or volume in which specific patterns of cell differentiation will take place or in which cells interpret a specific environment.	BP	2.01674e-12	84	355	170688	1602382	9.00069e-09	2290	FOXG1
bp.456	GO:0003002	regionalization	The pattern specification process that results in the subdivision of an axis or axes in space to define an area or volume in which specific patterns of cell differentiation will take place or in which cells interpret a specific environment.	BP	2.01674e-12	84	355	170688	1602382	9.00069e-09	2128	EVX1
bp.457	GO:0003002	regionalization	The pattern specification process that results in the subdivision of an axis or axes in space to define an area or volume in which specific patterns of cell differentiation will take place or in which cells interpret a specific environment.	BP	2.01674e-12	84	355	170688	1602382	9.00069e-09	2637	GBX2
bp.458	GO:0003002	regionalization	The pattern specification process that results in the subdivision of an axis or axes in space to define an area or volume in which specific patterns of cell differentiation will take place or in which cells interpret a specific environment.	BP	2.01674e-12	84	355	170688	1602382	9.00069e-09	3280	HES1
bp.459	GO:0003002	regionalization	The pattern specification process that results in the subdivision of an axis or axes in space to define an area or volume in which specific patterns of cell differentiation will take place or in which cells interpret a specific environment.	BP	2.01674e-12	84	355	170688	1602382	9.00069e-09	79809	TTC21B
bp.460	GO:0003002	regionalization	The pattern specification process that results in the subdivision of an axis or axes in space to define an area or volume in which specific patterns of cell differentiation will take place or in which cells interpret a specific environment.	BP	2.01674e-12	84	355	170688	1602382	9.00069e-09	3232	HOXD3
bp.461	GO:0003002	regionalization	The pattern specification process that results in the subdivision of an axis or axes in space to define an area or volume in which specific patterns of cell differentiation will take place or in which cells interpret a specific environment.	BP	2.01674e-12	84	355	170688	1602382	9.00069e-09	8313	AXIN2
bp.462	GO:0003002	regionalization	The pattern specification process that results in the subdivision of an axis or axes in space to define an area or volume in which specific patterns of cell differentiation will take place or in which cells interpret a specific environment.	BP	2.01674e-12	84	355	170688	1602382	9.00069e-09	441478	NRARP
bp.463	GO:0003002	regionalization	The pattern specification process that results in the subdivision of an axis or axes in space to define an area or volume in which specific patterns of cell differentiation will take place or in which cells interpret a specific environment.	BP	2.01674e-12	84	355	170688	1602382	9.00069e-09	27023	FOXB1
bp.464	GO:0003002	regionalization	The pattern specification process that results in the subdivision of an axis or axes in space to define an area or volume in which specific patterns of cell differentiation will take place or in which cells interpret a specific environment.	BP	2.01674e-12	84	355	170688	1602382	9.00069e-09	80319	CXXC4
bp.465	GO:0003002	regionalization	The pattern specification process that results in the subdivision of an axis or axes in space to define an area or volume in which specific patterns of cell differentiation will take place or in which cells interpret a specific environment.	BP	2.01674e-12	84	355	170688	1602382	9.00069e-09	4617	MYF5
bp.466	GO:0003002	regionalization	The pattern specification process that results in the subdivision of an axis or axes in space to define an area or volume in which specific patterns of cell differentiation will take place or in which cells interpret a specific environment.	BP	2.01674e-12	84	355	170688	1602382	9.00069e-09	3211	HOXB1
bp.467	GO:0003002	regionalization	The pattern specification process that results in the subdivision of an axis or axes in space to define an area or volume in which specific patterns of cell differentiation will take place or in which cells interpret a specific environment.	BP	2.01674e-12	84	355	170688	1602382	9.00069e-09	89780	WNT3A
bp.468	GO:0003002	regionalization	The pattern specification process that results in the subdivision of an axis or axes in space to define an area or volume in which specific patterns of cell differentiation will take place or in which cells interpret a specific environment.	BP	2.01674e-12	84	355	170688	1602382	9.00069e-09	343930	MSGN1
bp.469	GO:0003002	regionalization	The pattern specification process that results in the subdivision of an axis or axes in space to define an area or volume in which specific patterns of cell differentiation will take place or in which cells interpret a specific environment.	BP	2.01674e-12	84	355	170688	1602382	9.00069e-09	92129	RIPPLY1
bp.470	GO:0003002	regionalization	The pattern specification process that results in the subdivision of an axis or axes in space to define an area or volume in which specific patterns of cell differentiation will take place or in which cells interpret a specific environment.	BP	2.01674e-12	84	355	170688	1602382	9.00069e-09	3218	HOXB8
bp.471	GO:0003002	regionalization	The pattern specification process that results in the subdivision of an axis or axes in space to define an area or volume in which specific patterns of cell differentiation will take place or in which cells interpret a specific environment.	BP	2.01674e-12	84	355	170688	1602382	9.00069e-09	4821	NKX2-2
bp.472	GO:0003002	regionalization	The pattern specification process that results in the subdivision of an axis or axes in space to define an area or volume in which specific patterns of cell differentiation will take place or in which cells interpret a specific environment.	BP	2.01674e-12	84	355	170688	1602382	9.00069e-09	3215	HOXB5
bp.473	GO:0003002	regionalization	The pattern specification process that results in the subdivision of an axis or axes in space to define an area or volume in which specific patterns of cell differentiation will take place or in which cells interpret a specific environment.	BP	2.01674e-12	84	355	170688	1602382	9.00069e-09	1045	CDX2
bp.474	GO:0003002	regionalization	The pattern specification process that results in the subdivision of an axis or axes in space to define an area or volume in which specific patterns of cell differentiation will take place or in which cells interpret a specific environment.	BP	2.01674e-12	84	355	170688	1602382	9.00069e-09	55897	MESP1
bp.475	GO:0003002	regionalization	The pattern specification process that results in the subdivision of an axis or axes in space to define an area or volume in which specific patterns of cell differentiation will take place or in which cells interpret a specific environment.	BP	2.01674e-12	84	355	170688	1602382	9.00069e-09	3214	HOXB4
bp.476	GO:0003002	regionalization	The pattern specification process that results in the subdivision of an axis or axes in space to define an area or volume in which specific patterns of cell differentiation will take place or in which cells interpret a specific environment.	BP	2.01674e-12	84	355	170688	1602382	9.00069e-09	2294	FOXF1
bp.477	GO:0003002	regionalization	The pattern specification process that results in the subdivision of an axis or axes in space to define an area or volume in which specific patterns of cell differentiation will take place or in which cells interpret a specific environment.	BP	2.01674e-12	84	355	170688	1602382	9.00069e-09	84678	KDM2B
bp.478	GO:0003002	regionalization	The pattern specification process that results in the subdivision of an axis or axes in space to define an area or volume in which specific patterns of cell differentiation will take place or in which cells interpret a specific environment.	BP	2.01674e-12	84	355	170688	1602382	9.00069e-09	5090	PBX3
bp.479	GO:0003002	regionalization	The pattern specification process that results in the subdivision of an axis or axes in space to define an area or volume in which specific patterns of cell differentiation will take place or in which cells interpret a specific environment.	BP	2.01674e-12	84	355	170688	1602382	9.00069e-09	3204	HOXA7
bp.480	GO:0003002	regionalization	The pattern specification process that results in the subdivision of an axis or axes in space to define an area or volume in which specific patterns of cell differentiation will take place or in which cells interpret a specific environment.	BP	2.01674e-12	84	355	170688	1602382	9.00069e-09	5081	PAX7
bp.481	GO:0003002	regionalization	The pattern specification process that results in the subdivision of an axis or axes in space to define an area or volume in which specific patterns of cell differentiation will take place or in which cells interpret a specific environment.	BP	2.01674e-12	84	355	170688	1602382	9.00069e-09	3212	HOXB2
bp.482	GO:0003002	regionalization	The pattern specification process that results in the subdivision of an axis or axes in space to define an area or volume in which specific patterns of cell differentiation will take place or in which cells interpret a specific environment.	BP	2.01674e-12	84	355	170688	1602382	9.00069e-09	7478	WNT8A
bp.483	GO:0003002	regionalization	The pattern specification process that results in the subdivision of an axis or axes in space to define an area or volume in which specific patterns of cell differentiation will take place or in which cells interpret a specific environment.	BP	2.01674e-12	84	355	170688	1602382	9.00069e-09	1044	CDX1
bp.484	GO:0003002	regionalization	The pattern specification process that results in the subdivision of an axis or axes in space to define an area or volume in which specific patterns of cell differentiation will take place or in which cells interpret a specific environment.	BP	2.01674e-12	84	355	170688	1602382	9.00069e-09	5076	PAX2
bp.485	GO:0003002	regionalization	The pattern specification process that results in the subdivision of an axis or axes in space to define an area or volume in which specific patterns of cell differentiation will take place or in which cells interpret a specific environment.	BP	2.01674e-12	84	355	170688	1602382	9.00069e-09	6926	TBX3
bp.486	GO:0003002	regionalization	The pattern specification process that results in the subdivision of an axis or axes in space to define an area or volume in which specific patterns of cell differentiation will take place or in which cells interpret a specific environment.	BP	2.01674e-12	84	355	170688	1602382	9.00069e-09	6495	SIX1
bp.487	GO:0003002	regionalization	The pattern specification process that results in the subdivision of an axis or axes in space to define an area or volume in which specific patterns of cell differentiation will take place or in which cells interpret a specific environment.	BP	2.01674e-12	84	355	170688	1602382	9.00069e-09	134701	RIPPLY2
bp.488	GO:0003002	regionalization	The pattern specification process that results in the subdivision of an axis or axes in space to define an area or volume in which specific patterns of cell differentiation will take place or in which cells interpret a specific environment.	BP	2.01674e-12	84	355	170688	1602382	9.00069e-09	3202	HOXA5
bp.489	GO:0003002	regionalization	The pattern specification process that results in the subdivision of an axis or axes in space to define an area or volume in which specific patterns of cell differentiation will take place or in which cells interpret a specific environment.	BP	2.01674e-12	84	355	170688	1602382	9.00069e-09	6434	TRA2B
bp.490	GO:0003002	regionalization	The pattern specification process that results in the subdivision of an axis or axes in space to define an area or volume in which specific patterns of cell differentiation will take place or in which cells interpret a specific environment.	BP	2.01674e-12	84	355	170688	1602382	9.00069e-09	6091	ROBO1
bp.491	GO:0003007	heart morphogenesis	The developmental process in which the heart is generated and organized. The heart is a hollow, muscular organ, which, by contracting rhythmically, keeps up the circulation of the blood.	BP	5.16224e-06	52	258	170688	1602382	0.0010971	196528	ARID2
bp.492	GO:0003007	heart morphogenesis	The developmental process in which the heart is generated and organized. The heart is a hollow, muscular organ, which, by contracting rhythmically, keeps up the circulation of the blood.	BP	5.16224e-06	52	258	170688	1602382	0.0010971	3037	HAS2
bp.493	GO:0003007	heart morphogenesis	The developmental process in which the heart is generated and organized. The heart is a hollow, muscular organ, which, by contracting rhythmically, keeps up the circulation of the blood.	BP	5.16224e-06	52	258	170688	1602382	0.0010971	54345	SOX18
bp.494	GO:0003007	heart morphogenesis	The developmental process in which the heart is generated and organized. The heart is a hollow, muscular organ, which, by contracting rhythmically, keeps up the circulation of the blood.	BP	5.16224e-06	52	258	170688	1602382	0.0010971	1289	COL5A1
bp.495	GO:0003007	heart morphogenesis	The developmental process in which the heart is generated and organized. The heart is a hollow, muscular organ, which, by contracting rhythmically, keeps up the circulation of the blood.	BP	5.16224e-06	52	258	170688	1602382	0.0010971	3725	JUN
bp.496	GO:0003007	heart morphogenesis	The developmental process in which the heart is generated and organized. The heart is a hollow, muscular organ, which, by contracting rhythmically, keeps up the circulation of the blood.	BP	5.16224e-06	52	258	170688	1602382	0.0010971	2050	EPHB4
bp.497	GO:0003007	heart morphogenesis	The developmental process in which the heart is generated and organized. The heart is a hollow, muscular organ, which, by contracting rhythmically, keeps up the circulation of the blood.	BP	5.16224e-06	52	258	170688	1602382	0.0010971	9353	SLIT2
bp.498	GO:0003007	heart morphogenesis	The developmental process in which the heart is generated and organized. The heart is a hollow, muscular organ, which, by contracting rhythmically, keeps up the circulation of the blood.	BP	5.16224e-06	52	258	170688	1602382	0.0010971	145873	MESP2
bp.499	GO:0003007	heart morphogenesis	The developmental process in which the heart is generated and organized. The heart is a hollow, muscular organ, which, by contracting rhythmically, keeps up the circulation of the blood.	BP	5.16224e-06	52	258	170688	1602382	0.0010971	115701	ALPK2
bp.500	GO:0003007	heart morphogenesis	The developmental process in which the heart is generated and organized. The heart is a hollow, muscular organ, which, by contracting rhythmically, keeps up the circulation of the blood.	BP	5.16224e-06	52	258	170688	1602382	0.0010971	10370	CITED2
bp.501	GO:0003007	heart morphogenesis	The developmental process in which the heart is generated and organized. The heart is a hollow, muscular organ, which, by contracting rhythmically, keeps up the circulation of the blood.	BP	5.16224e-06	52	258	170688	1602382	0.0010971	6911	TBX6
bp.502	GO:0003007	heart morphogenesis	The developmental process in which the heart is generated and organized. The heart is a hollow, muscular organ, which, by contracting rhythmically, keeps up the circulation of the blood.	BP	5.16224e-06	52	258	170688	1602382	0.0010971	5292	PIM1
bp.503	GO:0003007	heart morphogenesis	The developmental process in which the heart is generated and organized. The heart is a hollow, muscular organ, which, by contracting rhythmically, keeps up the circulation of the blood.	BP	5.16224e-06	52	258	170688	1602382	0.0010971	8313	AXIN2
bp.504	GO:0003007	heart morphogenesis	The developmental process in which the heart is generated and organized. The heart is a hollow, muscular organ, which, by contracting rhythmically, keeps up the circulation of the blood.	BP	5.16224e-06	52	258	170688	1602382	0.0010971	5914	RARA
bp.505	GO:0003007	heart morphogenesis	The developmental process in which the heart is generated and organized. The heart is a hollow, muscular organ, which, by contracting rhythmically, keeps up the circulation of the blood.	BP	5.16224e-06	52	258	170688	1602382	0.0010971	221496	LEMD2
bp.506	GO:0003007	heart morphogenesis	The developmental process in which the heart is generated and organized. The heart is a hollow, muscular organ, which, by contracting rhythmically, keeps up the circulation of the blood.	BP	5.16224e-06	52	258	170688	1602382	0.0010971	3280	HES1
bp.507	GO:0003007	heart morphogenesis	The developmental process in which the heart is generated and organized. The heart is a hollow, muscular organ, which, by contracting rhythmically, keeps up the circulation of the blood.	BP	5.16224e-06	52	258	170688	1602382	0.0010971	89780	WNT3A
bp.508	GO:0003007	heart morphogenesis	The developmental process in which the heart is generated and organized. The heart is a hollow, muscular organ, which, by contracting rhythmically, keeps up the circulation of the blood.	BP	5.16224e-06	52	258	170688	1602382	0.0010971	2294	FOXF1
bp.509	GO:0003007	heart morphogenesis	The developmental process in which the heart is generated and organized. The heart is a hollow, muscular organ, which, by contracting rhythmically, keeps up the circulation of the blood.	BP	5.16224e-06	52	258	170688	1602382	0.0010971	8321	FZD1
bp.510	GO:0003007	heart morphogenesis	The developmental process in which the heart is generated and organized. The heart is a hollow, muscular organ, which, by contracting rhythmically, keeps up the circulation of the blood.	BP	5.16224e-06	52	258	170688	1602382	0.0010971	6862	T
bp.511	GO:0003007	heart morphogenesis	The developmental process in which the heart is generated and organized. The heart is a hollow, muscular organ, which, by contracting rhythmically, keeps up the circulation of the blood.	BP	5.16224e-06	52	258	170688	1602382	0.0010971	6091	ROBO1
bp.512	GO:0003007	heart morphogenesis	The developmental process in which the heart is generated and organized. The heart is a hollow, muscular organ, which, by contracting rhythmically, keeps up the circulation of the blood.	BP	5.16224e-06	52	258	170688	1602382	0.0010971	79810	PTCD2
bp.513	GO:0003007	heart morphogenesis	The developmental process in which the heart is generated and organized. The heart is a hollow, muscular organ, which, by contracting rhythmically, keeps up the circulation of the blood.	BP	5.16224e-06	52	258	170688	1602382	0.0010971	10413	YAP1
bp.514	GO:0003007	heart morphogenesis	The developmental process in which the heart is generated and organized. The heart is a hollow, muscular organ, which, by contracting rhythmically, keeps up the circulation of the blood.	BP	5.16224e-06	52	258	170688	1602382	0.0010971	79633	FAT4
bp.515	GO:0003007	heart morphogenesis	The developmental process in which the heart is generated and organized. The heart is a hollow, muscular organ, which, by contracting rhythmically, keeps up the circulation of the blood.	BP	5.16224e-06	52	258	170688	1602382	0.0010971	4487	MSX1
bp.516	GO:0003007	heart morphogenesis	The developmental process in which the heart is generated and organized. The heart is a hollow, muscular organ, which, by contracting rhythmically, keeps up the circulation of the blood.	BP	5.16224e-06	52	258	170688	1602382	0.0010971	55897	MESP1
bp.517	GO:0003007	heart morphogenesis	The developmental process in which the heart is generated and organized. The heart is a hollow, muscular organ, which, by contracting rhythmically, keeps up the circulation of the blood.	BP	5.16224e-06	52	258	170688	1602382	0.0010971	7468	WHSC1
bp.518	GO:0003007	heart morphogenesis	The developmental process in which the heart is generated and organized. The heart is a hollow, muscular organ, which, by contracting rhythmically, keeps up the circulation of the blood.	BP	5.16224e-06	52	258	170688	1602382	0.0010971	7157	TP53
bp.519	GO:0003007	heart morphogenesis	The developmental process in which the heart is generated and organized. The heart is a hollow, muscular organ, which, by contracting rhythmically, keeps up the circulation of the blood.	BP	5.16224e-06	52	258	170688	1602382	0.0010971	6591	SNAI2
bp.520	GO:0003007	heart morphogenesis	The developmental process in which the heart is generated and organized. The heart is a hollow, muscular organ, which, by contracting rhythmically, keeps up the circulation of the blood.	BP	5.16224e-06	52	258	170688	1602382	0.0010971	4092	SMAD7
bp.521	GO:0003007	heart morphogenesis	The developmental process in which the heart is generated and organized. The heart is a hollow, muscular organ, which, by contracting rhythmically, keeps up the circulation of the blood.	BP	5.16224e-06	52	258	170688	1602382	0.0010971	10439	OLFM1
bp.522	GO:0003007	heart morphogenesis	The developmental process in which the heart is generated and organized. The heart is a hollow, muscular organ, which, by contracting rhythmically, keeps up the circulation of the blood.	BP	5.16224e-06	52	258	170688	1602382	0.0010971	407975	MIR17HG
bp.523	GO:0003007	heart morphogenesis	The developmental process in which the heart is generated and organized. The heart is a hollow, muscular organ, which, by contracting rhythmically, keeps up the circulation of the blood.	BP	5.16224e-06	52	258	170688	1602382	0.0010971	6926	TBX3
bp.524	GO:0003007	heart morphogenesis	The developmental process in which the heart is generated and organized. The heart is a hollow, muscular organ, which, by contracting rhythmically, keeps up the circulation of the blood.	BP	5.16224e-06	52	258	170688	1602382	0.0010971	10269	ZMPSTE24
bp.525	GO:0003007	heart morphogenesis	The developmental process in which the heart is generated and organized. The heart is a hollow, muscular organ, which, by contracting rhythmically, keeps up the circulation of the blood.	BP	5.16224e-06	52	258	170688	1602382	0.0010971	1901	S1PR1
bp.526	GO:0003007	heart morphogenesis	The developmental process in which the heart is generated and organized. The heart is a hollow, muscular organ, which, by contracting rhythmically, keeps up the circulation of the blood.	BP	5.16224e-06	52	258	170688	1602382	0.0010971	5457	POU4F1
bp.527	GO:0003007	heart morphogenesis	The developmental process in which the heart is generated and organized. The heart is a hollow, muscular organ, which, by contracting rhythmically, keeps up the circulation of the blood.	BP	5.16224e-06	52	258	170688	1602382	0.0010971	6654	SOS1
bp.528	GO:0003007	heart morphogenesis	The developmental process in which the heart is generated and organized. The heart is a hollow, muscular organ, which, by contracting rhythmically, keeps up the circulation of the blood.	BP	5.16224e-06	52	258	170688	1602382	0.0010971	3398	ID2
bp.529	GO:0003007	heart morphogenesis	The developmental process in which the heart is generated and organized. The heart is a hollow, muscular organ, which, by contracting rhythmically, keeps up the circulation of the blood.	BP	5.16224e-06	52	258	170688	1602382	0.0010971	1942	EFNA1
bp.530	GO:0003007	heart morphogenesis	The developmental process in which the heart is generated and organized. The heart is a hollow, muscular organ, which, by contracting rhythmically, keeps up the circulation of the blood.	BP	5.16224e-06	52	258	170688	1602382	0.0010971	2931	GSK3A
bp.531	GO:0003007	heart morphogenesis	The developmental process in which the heart is generated and organized. The heart is a hollow, muscular organ, which, by contracting rhythmically, keeps up the circulation of the blood.	BP	5.16224e-06	52	258	170688	1602382	0.0010971	655	BMP7
bp.532	GO:0003007	heart morphogenesis	The developmental process in which the heart is generated and organized. The heart is a hollow, muscular organ, which, by contracting rhythmically, keeps up the circulation of the blood.	BP	5.16224e-06	52	258	170688	1602382	0.0010971	2625	GATA3
bp.533	GO:0003007	heart morphogenesis	The developmental process in which the heart is generated and organized. The heart is a hollow, muscular organ, which, by contracting rhythmically, keeps up the circulation of the blood.	BP	5.16224e-06	52	258	170688	1602382	0.0010971	4193	MDM2
bp.534	GO:0003007	heart morphogenesis	The developmental process in which the heart is generated and organized. The heart is a hollow, muscular organ, which, by contracting rhythmically, keeps up the circulation of the blood.	BP	5.16224e-06	52	258	170688	1602382	0.0010971	2535	FZD2
bp.535	GO:0003007	heart morphogenesis	The developmental process in which the heart is generated and organized. The heart is a hollow, muscular organ, which, by contracting rhythmically, keeps up the circulation of the blood.	BP	5.16224e-06	52	258	170688	1602382	0.0010971	6495	SIX1
bp.536	GO:0003007	heart morphogenesis	The developmental process in which the heart is generated and organized. The heart is a hollow, muscular organ, which, by contracting rhythmically, keeps up the circulation of the blood.	BP	5.16224e-06	52	258	170688	1602382	0.0010971	7474	WNT5A
bp.537	GO:0003007	heart morphogenesis	The developmental process in which the heart is generated and organized. The heart is a hollow, muscular organ, which, by contracting rhythmically, keeps up the circulation of the blood.	BP	5.16224e-06	52	258	170688	1602382	0.0010971	22943	DKK1
bp.538	GO:0003007	heart morphogenesis	The developmental process in which the heart is generated and organized. The heart is a hollow, muscular organ, which, by contracting rhythmically, keeps up the circulation of the blood.	BP	5.16224e-06	52	258	170688	1602382	0.0010971	2626	GATA4
bp.539	GO:0003007	heart morphogenesis	The developmental process in which the heart is generated and organized. The heart is a hollow, muscular organ, which, by contracting rhythmically, keeps up the circulation of the blood.	BP	5.16224e-06	52	258	170688	1602382	0.0010971	6423	SFRP2
bp.540	GO:0003007	heart morphogenesis	The developmental process in which the heart is generated and organized. The heart is a hollow, muscular organ, which, by contracting rhythmically, keeps up the circulation of the blood.	BP	5.16224e-06	52	258	170688	1602382	0.0010971	8195	MKKS
bp.541	GO:0003007	heart morphogenesis	The developmental process in which the heart is generated and organized. The heart is a hollow, muscular organ, which, by contracting rhythmically, keeps up the circulation of the blood.	BP	5.16224e-06	52	258	170688	1602382	0.0010971	7547	ZIC3
bp.542	GO:0003007	heart morphogenesis	The developmental process in which the heart is generated and organized. The heart is a hollow, muscular organ, which, by contracting rhythmically, keeps up the circulation of the blood.	BP	5.16224e-06	52	258	170688	1602382	0.0010971	83852	SETDB2
bp.543	GO:0003205	cardiac chamber development	The progression of a cardiac chamber over time, from its formation to the mature structure. A cardiac chamber is an enclosed cavity within the heart.	BP	3.30425e-05	37	174	170688	1602382	0.00483504	2626	GATA4
bp.544	GO:0003205	cardiac chamber development	The progression of a cardiac chamber over time, from its formation to the mature structure. A cardiac chamber is an enclosed cavity within the heart.	BP	3.30425e-05	37	174	170688	1602382	0.00483504	8321	FZD1
bp.545	GO:0003205	cardiac chamber development	The progression of a cardiac chamber over time, from its formation to the mature structure. A cardiac chamber is an enclosed cavity within the heart.	BP	3.30425e-05	37	174	170688	1602382	0.00483504	4092	SMAD7
bp.546	GO:0003205	cardiac chamber development	The progression of a cardiac chamber over time, from its formation to the mature structure. A cardiac chamber is an enclosed cavity within the heart.	BP	3.30425e-05	37	174	170688	1602382	0.00483504	5457	POU4F1
bp.547	GO:0003205	cardiac chamber development	The progression of a cardiac chamber over time, from its formation to the mature structure. A cardiac chamber is an enclosed cavity within the heart.	BP	3.30425e-05	37	174	170688	1602382	0.00483504	5125	PCSK5
bp.548	GO:0003205	cardiac chamber development	The progression of a cardiac chamber over time, from its formation to the mature structure. A cardiac chamber is an enclosed cavity within the heart.	BP	3.30425e-05	37	174	170688	1602382	0.00483504	80000	GREB1L
bp.549	GO:0003205	cardiac chamber development	The progression of a cardiac chamber over time, from its formation to the mature structure. A cardiac chamber is an enclosed cavity within the heart.	BP	3.30425e-05	37	174	170688	1602382	0.00483504	9353	SLIT2
bp.550	GO:0003205	cardiac chamber development	The progression of a cardiac chamber over time, from its formation to the mature structure. A cardiac chamber is an enclosed cavity within the heart.	BP	3.30425e-05	37	174	170688	1602382	0.00483504	10269	ZMPSTE24
bp.551	GO:0003205	cardiac chamber development	The progression of a cardiac chamber over time, from its formation to the mature structure. A cardiac chamber is an enclosed cavity within the heart.	BP	3.30425e-05	37	174	170688	1602382	0.00483504	84516	DCTN5
bp.552	GO:0003205	cardiac chamber development	The progression of a cardiac chamber over time, from its formation to the mature structure. A cardiac chamber is an enclosed cavity within the heart.	BP	3.30425e-05	37	174	170688	1602382	0.00483504	655	BMP7
bp.553	GO:0003205	cardiac chamber development	The progression of a cardiac chamber over time, from its formation to the mature structure. A cardiac chamber is an enclosed cavity within the heart.	BP	3.30425e-05	37	174	170688	1602382	0.00483504	9321	TRIP11
bp.554	GO:0003205	cardiac chamber development	The progression of a cardiac chamber over time, from its formation to the mature structure. A cardiac chamber is an enclosed cavity within the heart.	BP	3.30425e-05	37	174	170688	1602382	0.00483504	7474	WNT5A
bp.555	GO:0003205	cardiac chamber development	The progression of a cardiac chamber over time, from its formation to the mature structure. A cardiac chamber is an enclosed cavity within the heart.	BP	3.30425e-05	37	174	170688	1602382	0.00483504	9782	MATR3
bp.556	GO:0003205	cardiac chamber development	The progression of a cardiac chamber over time, from its formation to the mature structure. A cardiac chamber is an enclosed cavity within the heart.	BP	3.30425e-05	37	174	170688	1602382	0.00483504	79810	PTCD2
bp.557	GO:0003205	cardiac chamber development	The progression of a cardiac chamber over time, from its formation to the mature structure. A cardiac chamber is an enclosed cavity within the heart.	BP	3.30425e-05	37	174	170688	1602382	0.00483504	10370	CITED2
bp.558	GO:0003205	cardiac chamber development	The progression of a cardiac chamber over time, from its formation to the mature structure. A cardiac chamber is an enclosed cavity within the heart.	BP	3.30425e-05	37	174	170688	1602382	0.00483504	2931	GSK3A
bp.559	GO:0003205	cardiac chamber development	The progression of a cardiac chamber over time, from its formation to the mature structure. A cardiac chamber is an enclosed cavity within the heart.	BP	3.30425e-05	37	174	170688	1602382	0.00483504	6654	SOS1
bp.560	GO:0003205	cardiac chamber development	The progression of a cardiac chamber over time, from its formation to the mature structure. A cardiac chamber is an enclosed cavity within the heart.	BP	3.30425e-05	37	174	170688	1602382	0.00483504	2535	FZD2
bp.561	GO:0003205	cardiac chamber development	The progression of a cardiac chamber over time, from its formation to the mature structure. A cardiac chamber is an enclosed cavity within the heart.	BP	3.30425e-05	37	174	170688	1602382	0.00483504	7468	WHSC1
bp.562	GO:0003205	cardiac chamber development	The progression of a cardiac chamber over time, from its formation to the mature structure. A cardiac chamber is an enclosed cavity within the heart.	BP	3.30425e-05	37	174	170688	1602382	0.00483504	6091	ROBO1
bp.563	GO:0003205	cardiac chamber development	The progression of a cardiac chamber over time, from its formation to the mature structure. A cardiac chamber is an enclosed cavity within the heart.	BP	3.30425e-05	37	174	170688	1602382	0.00483504	7157	TP53
bp.564	GO:0003205	cardiac chamber development	The progression of a cardiac chamber over time, from its formation to the mature structure. A cardiac chamber is an enclosed cavity within the heart.	BP	3.30425e-05	37	174	170688	1602382	0.00483504	9794	MAML1
bp.565	GO:0003205	cardiac chamber development	The progression of a cardiac chamber over time, from its formation to the mature structure. A cardiac chamber is an enclosed cavity within the heart.	BP	3.30425e-05	37	174	170688	1602382	0.00483504	3280	HES1
bp.566	GO:0003205	cardiac chamber development	The progression of a cardiac chamber over time, from its formation to the mature structure. A cardiac chamber is an enclosed cavity within the heart.	BP	3.30425e-05	37	174	170688	1602382	0.00483504	6926	TBX3
bp.567	GO:0003205	cardiac chamber development	The progression of a cardiac chamber over time, from its formation to the mature structure. A cardiac chamber is an enclosed cavity within the heart.	BP	3.30425e-05	37	174	170688	1602382	0.00483504	5914	RARA
bp.568	GO:0003205	cardiac chamber development	The progression of a cardiac chamber over time, from its formation to the mature structure. A cardiac chamber is an enclosed cavity within the heart.	BP	3.30425e-05	37	174	170688	1602382	0.00483504	57167	SALL4
bp.569	GO:0003205	cardiac chamber development	The progression of a cardiac chamber over time, from its formation to the mature structure. A cardiac chamber is an enclosed cavity within the heart.	BP	3.30425e-05	37	174	170688	1602382	0.00483504	5754	PTK7
bp.570	GO:0003205	cardiac chamber development	The progression of a cardiac chamber over time, from its formation to the mature structure. A cardiac chamber is an enclosed cavity within the heart.	BP	3.30425e-05	37	174	170688	1602382	0.00483504	6423	SFRP2
bp.571	GO:0003205	cardiac chamber development	The progression of a cardiac chamber over time, from its formation to the mature structure. A cardiac chamber is an enclosed cavity within the heart.	BP	3.30425e-05	37	174	170688	1602382	0.00483504	6911	TBX6
bp.572	GO:0003205	cardiac chamber development	The progression of a cardiac chamber over time, from its formation to the mature structure. A cardiac chamber is an enclosed cavity within the heart.	BP	3.30425e-05	37	174	170688	1602382	0.00483504	4193	MDM2
bp.573	GO:0003205	cardiac chamber development	The progression of a cardiac chamber over time, from its formation to the mature structure. A cardiac chamber is an enclosed cavity within the heart.	BP	3.30425e-05	37	174	170688	1602382	0.00483504	8289	ARID1A
bp.574	GO:0003205	cardiac chamber development	The progression of a cardiac chamber over time, from its formation to the mature structure. A cardiac chamber is an enclosed cavity within the heart.	BP	3.30425e-05	37	174	170688	1602382	0.00483504	407975	MIR17HG
bp.575	GO:0003205	cardiac chamber development	The progression of a cardiac chamber over time, from its formation to the mature structure. A cardiac chamber is an enclosed cavity within the heart.	BP	3.30425e-05	37	174	170688	1602382	0.00483504	2625	GATA3
bp.576	GO:0003205	cardiac chamber development	The progression of a cardiac chamber over time, from its formation to the mature structure. A cardiac chamber is an enclosed cavity within the heart.	BP	3.30425e-05	37	174	170688	1602382	0.00483504	55897	MESP1
bp.577	GO:0003205	cardiac chamber development	The progression of a cardiac chamber over time, from its formation to the mature structure. A cardiac chamber is an enclosed cavity within the heart.	BP	3.30425e-05	37	174	170688	1602382	0.00483504	64220	STRA6
bp.578	GO:0003205	cardiac chamber development	The progression of a cardiac chamber over time, from its formation to the mature structure. A cardiac chamber is an enclosed cavity within the heart.	BP	3.30425e-05	37	174	170688	1602382	0.00483504	2294	FOXF1
bp.579	GO:0003205	cardiac chamber development	The progression of a cardiac chamber over time, from its formation to the mature structure. A cardiac chamber is an enclosed cavity within the heart.	BP	3.30425e-05	37	174	170688	1602382	0.00483504	3398	ID2
bp.580	GO:0003281	ventricular septum development	The progression of the ventricular septum over time from its formation to the mature structure.	BP	3.15033e-05	21	76	170688	1602382	0.00468664	4092	SMAD7
bp.581	GO:0003281	ventricular septum development	The progression of the ventricular septum over time from its formation to the mature structure.	BP	3.15033e-05	21	76	170688	1602382	0.00468664	407975	MIR17HG
bp.582	GO:0003281	ventricular septum development	The progression of the ventricular septum over time from its formation to the mature structure.	BP	3.15033e-05	21	76	170688	1602382	0.00468664	2535	FZD2
bp.583	GO:0003281	ventricular septum development	The progression of the ventricular septum over time from its formation to the mature structure.	BP	3.15033e-05	21	76	170688	1602382	0.00468664	8321	FZD1
bp.584	GO:0003281	ventricular septum development	The progression of the ventricular septum over time from its formation to the mature structure.	BP	3.15033e-05	21	76	170688	1602382	0.00468664	6091	ROBO1
bp.585	GO:0003281	ventricular septum development	The progression of the ventricular septum over time from its formation to the mature structure.	BP	3.15033e-05	21	76	170688	1602382	0.00468664	3280	HES1
bp.586	GO:0003281	ventricular septum development	The progression of the ventricular septum over time from its formation to the mature structure.	BP	3.15033e-05	21	76	170688	1602382	0.00468664	2626	GATA4
bp.587	GO:0003281	ventricular septum development	The progression of the ventricular septum over time from its formation to the mature structure.	BP	3.15033e-05	21	76	170688	1602382	0.00468664	4193	MDM2
bp.588	GO:0003281	ventricular septum development	The progression of the ventricular septum over time from its formation to the mature structure.	BP	3.15033e-05	21	76	170688	1602382	0.00468664	10370	CITED2
bp.589	GO:0003281	ventricular septum development	The progression of the ventricular septum over time from its formation to the mature structure.	BP	3.15033e-05	21	76	170688	1602382	0.00468664	3398	ID2
bp.590	GO:0003281	ventricular septum development	The progression of the ventricular septum over time from its formation to the mature structure.	BP	3.15033e-05	21	76	170688	1602382	0.00468664	57167	SALL4
bp.591	GO:0003281	ventricular septum development	The progression of the ventricular septum over time from its formation to the mature structure.	BP	3.15033e-05	21	76	170688	1602382	0.00468664	7468	WHSC1
bp.592	GO:0003281	ventricular septum development	The progression of the ventricular septum over time from its formation to the mature structure.	BP	3.15033e-05	21	76	170688	1602382	0.00468664	64220	STRA6
bp.593	GO:0003281	ventricular septum development	The progression of the ventricular septum over time from its formation to the mature structure.	BP	3.15033e-05	21	76	170688	1602382	0.00468664	9321	TRIP11
bp.594	GO:0003281	ventricular septum development	The progression of the ventricular septum over time from its formation to the mature structure.	BP	3.15033e-05	21	76	170688	1602382	0.00468664	9353	SLIT2
bp.595	GO:0003281	ventricular septum development	The progression of the ventricular septum over time from its formation to the mature structure.	BP	3.15033e-05	21	76	170688	1602382	0.00468664	9782	MATR3
bp.596	GO:0003281	ventricular septum development	The progression of the ventricular septum over time from its formation to the mature structure.	BP	3.15033e-05	21	76	170688	1602382	0.00468664	5754	PTK7
bp.597	GO:0003281	ventricular septum development	The progression of the ventricular septum over time from its formation to the mature structure.	BP	3.15033e-05	21	76	170688	1602382	0.00468664	7474	WNT5A
bp.598	GO:0003281	ventricular septum development	The progression of the ventricular septum over time from its formation to the mature structure.	BP	3.15033e-05	21	76	170688	1602382	0.00468664	6926	TBX3
bp.599	GO:0003281	ventricular septum development	The progression of the ventricular septum over time from its formation to the mature structure.	BP	3.15033e-05	21	76	170688	1602382	0.00468664	2625	GATA3
bp.600	GO:0003281	ventricular septum development	The progression of the ventricular septum over time from its formation to the mature structure.	BP	3.15033e-05	21	76	170688	1602382	0.00468664	84516	DCTN5
bp.601	GO:0006323	DNA packaging	Any process in which DNA and associated proteins are formed into a compact, orderly structure.	BP	6.33837e-05	46	240	170688	1602382	0.0076431	7994	KAT6A
bp.602	GO:0006323	DNA packaging	Any process in which DNA and associated proteins are formed into a compact, orderly structure.	BP	6.33837e-05	46	240	170688	1602382	0.0076431	80312	TET1
bp.603	GO:0006323	DNA packaging	Any process in which DNA and associated proteins are formed into a compact, orderly structure.	BP	6.33837e-05	46	240	170688	1602382	0.0076431	26993	AKAP8L
bp.604	GO:0006323	DNA packaging	Any process in which DNA and associated proteins are formed into a compact, orderly structure.	BP	6.33837e-05	46	240	170688	1602382	0.0076431	10541	ANP32B
bp.605	GO:0006323	DNA packaging	Any process in which DNA and associated proteins are formed into a compact, orderly structure.	BP	6.33837e-05	46	240	170688	1602382	0.0076431	3017	HIST1H2BD
bp.606	GO:0006323	DNA packaging	Any process in which DNA and associated proteins are formed into a compact, orderly structure.	BP	6.33837e-05	46	240	170688	1602382	0.0076431	55196	KIAA1551
bp.607	GO:0006323	DNA packaging	Any process in which DNA and associated proteins are formed into a compact, orderly structure.	BP	6.33837e-05	46	240	170688	1602382	0.0076431	8367	HIST1H4E
bp.608	GO:0006323	DNA packaging	Any process in which DNA and associated proteins are formed into a compact, orderly structure.	BP	6.33837e-05	46	240	170688	1602382	0.0076431	83983	TSSK6
bp.609	GO:0006323	DNA packaging	Any process in which DNA and associated proteins are formed into a compact, orderly structure.	BP	6.33837e-05	46	240	170688	1602382	0.0076431	8364	HIST1H4C
bp.610	GO:0006323	DNA packaging	Any process in which DNA and associated proteins are formed into a compact, orderly structure.	BP	6.33837e-05	46	240	170688	1602382	0.0076431	8363	HIST1H4J
bp.611	GO:0006323	DNA packaging	Any process in which DNA and associated proteins are formed into a compact, orderly structure.	BP	6.33837e-05	46	240	170688	1602382	0.0076431	22880	MORC2
bp.612	GO:0006323	DNA packaging	Any process in which DNA and associated proteins are formed into a compact, orderly structure.	BP	6.33837e-05	46	240	170688	1602382	0.0076431	128312	HIST3H2BB
bp.613	GO:0006323	DNA packaging	Any process in which DNA and associated proteins are formed into a compact, orderly structure.	BP	6.33837e-05	46	240	170688	1602382	0.0076431	64946	CENPH
bp.614	GO:0006323	DNA packaging	Any process in which DNA and associated proteins are formed into a compact, orderly structure.	BP	6.33837e-05	46	240	170688	1602382	0.0076431	8339	HIST1H2BG
bp.615	GO:0006323	DNA packaging	Any process in which DNA and associated proteins are formed into a compact, orderly structure.	BP	6.33837e-05	46	240	170688	1602382	0.0076431	8343	HIST1H2BF
bp.616	GO:0006323	DNA packaging	Any process in which DNA and associated proteins are formed into a compact, orderly structure.	BP	6.33837e-05	46	240	170688	1602382	0.0076431	8360	HIST1H4D
bp.617	GO:0006323	DNA packaging	Any process in which DNA and associated proteins are formed into a compact, orderly structure.	BP	6.33837e-05	46	240	170688	1602382	0.0076431	83852	SETDB2
bp.618	GO:0006323	DNA packaging	Any process in which DNA and associated proteins are formed into a compact, orderly structure.	BP	6.33837e-05	46	240	170688	1602382	0.0076431	79682	CENPU
bp.619	GO:0006323	DNA packaging	Any process in which DNA and associated proteins are formed into a compact, orderly structure.	BP	6.33837e-05	46	240	170688	1602382	0.0076431	55355	HJURP
bp.620	GO:0006323	DNA packaging	Any process in which DNA and associated proteins are formed into a compact, orderly structure.	BP	6.33837e-05	46	240	170688	1602382	0.0076431	3159	HMGA1
bp.621	GO:0006323	DNA packaging	Any process in which DNA and associated proteins are formed into a compact, orderly structure.	BP	6.33837e-05	46	240	170688	1602382	0.0076431	8359	HIST1H4A
bp.622	GO:0006323	DNA packaging	Any process in which DNA and associated proteins are formed into a compact, orderly structure.	BP	6.33837e-05	46	240	170688	1602382	0.0076431	54107	POLE3
bp.623	GO:0006323	DNA packaging	Any process in which DNA and associated proteins are formed into a compact, orderly structure.	BP	6.33837e-05	46	240	170688	1602382	0.0076431	8346	HIST1H2BI
bp.624	GO:0006323	DNA packaging	Any process in which DNA and associated proteins are formed into a compact, orderly structure.	BP	6.33837e-05	46	240	170688	1602382	0.0076431	11339	OIP5
bp.625	GO:0006323	DNA packaging	Any process in which DNA and associated proteins are formed into a compact, orderly structure.	BP	6.33837e-05	46	240	170688	1602382	0.0076431	401541	CENPP
bp.626	GO:0006323	DNA packaging	Any process in which DNA and associated proteins are formed into a compact, orderly structure.	BP	6.33837e-05	46	240	170688	1602382	0.0076431	8351	HIST1H3D
bp.627	GO:0006323	DNA packaging	Any process in which DNA and associated proteins are formed into a compact, orderly structure.	BP	6.33837e-05	46	240	170688	1602382	0.0076431	9555	H2AFY
bp.628	GO:0006323	DNA packaging	Any process in which DNA and associated proteins are formed into a compact, orderly structure.	BP	6.33837e-05	46	240	170688	1602382	0.0076431	8968	HIST1H3F
bp.629	GO:0006323	DNA packaging	Any process in which DNA and associated proteins are formed into a compact, orderly structure.	BP	6.33837e-05	46	240	170688	1602382	0.0076431	8345	HIST1H2BH
bp.630	GO:0006323	DNA packaging	Any process in which DNA and associated proteins are formed into a compact, orderly structure.	BP	6.33837e-05	46	240	170688	1602382	0.0076431	55723	ASF1B
bp.631	GO:0006323	DNA packaging	Any process in which DNA and associated proteins are formed into a compact, orderly structure.	BP	6.33837e-05	46	240	170688	1602382	0.0076431	891	CCNB1
bp.632	GO:0006323	DNA packaging	Any process in which DNA and associated proteins are formed into a compact, orderly structure.	BP	6.33837e-05	46	240	170688	1602382	0.0076431	8366	HIST1H4B
bp.633	GO:0006323	DNA packaging	Any process in which DNA and associated proteins are formed into a compact, orderly structure.	BP	6.33837e-05	46	240	170688	1602382	0.0076431	8091	HMGA2
bp.634	GO:0006323	DNA packaging	Any process in which DNA and associated proteins are formed into a compact, orderly structure.	BP	6.33837e-05	46	240	170688	1602382	0.0076431	57673	BEND3
bp.635	GO:0006323	DNA packaging	Any process in which DNA and associated proteins are formed into a compact, orderly structure.	BP	6.33837e-05	46	240	170688	1602382	0.0076431	8347	HIST1H2BC
bp.636	GO:0006323	DNA packaging	Any process in which DNA and associated proteins are formed into a compact, orderly structure.	BP	6.33837e-05	46	240	170688	1602382	0.0076431	148479	PHF13
bp.637	GO:0006323	DNA packaging	Any process in which DNA and associated proteins are formed into a compact, orderly structure.	BP	6.33837e-05	46	240	170688	1602382	0.0076431	23272	FAM208A
bp.638	GO:0006323	DNA packaging	Any process in which DNA and associated proteins are formed into a compact, orderly structure.	BP	6.33837e-05	46	240	170688	1602382	0.0076431	8349	HIST2H2BE
bp.639	GO:0006323	DNA packaging	Any process in which DNA and associated proteins are formed into a compact, orderly structure.	BP	6.33837e-05	46	240	170688	1602382	0.0076431	7157	TP53
bp.640	GO:0006323	DNA packaging	Any process in which DNA and associated proteins are formed into a compact, orderly structure.	BP	6.33837e-05	46	240	170688	1602382	0.0076431	9733	SART3
bp.641	GO:0006323	DNA packaging	Any process in which DNA and associated proteins are formed into a compact, orderly structure.	BP	6.33837e-05	46	240	170688	1602382	0.0076431	57082	KNL1
bp.642	GO:0006323	DNA packaging	Any process in which DNA and associated proteins are formed into a compact, orderly structure.	BP	6.33837e-05	46	240	170688	1602382	0.0076431	113130	CDCA5
bp.643	GO:0006323	DNA packaging	Any process in which DNA and associated proteins are formed into a compact, orderly structure.	BP	6.33837e-05	46	240	170688	1602382	0.0076431	29781	NCAPH2
bp.644	GO:0006323	DNA packaging	Any process in which DNA and associated proteins are formed into a compact, orderly structure.	BP	6.33837e-05	46	240	170688	1602382	0.0076431	23063	WAPL
bp.645	GO:0006323	DNA packaging	Any process in which DNA and associated proteins are formed into a compact, orderly structure.	BP	6.33837e-05	46	240	170688	1602382	0.0076431	58531	PRM3
bp.646	GO:0006323	DNA packaging	Any process in which DNA and associated proteins are formed into a compact, orderly structure.	BP	6.33837e-05	46	240	170688	1602382	0.0076431	8348	HIST1H2BO
bp.647	GO:0006325	chromatin organization	Any process that results in the specification, formation or maintenance of the physical structure of eukaryotic chromatin.	BP	4.63435e-07	134	820	170688	1602382	0.000208328	51147	ING4
bp.648	GO:0006325	chromatin organization	Any process that results in the specification, formation or maintenance of the physical structure of eukaryotic chromatin.	BP	4.63435e-07	134	820	170688	1602382	0.000208328	80218	NAA50
bp.649	GO:0006325	chromatin organization	Any process that results in the specification, formation or maintenance of the physical structure of eukaryotic chromatin.	BP	4.63435e-07	134	820	170688	1602382	0.000208328	84939	MUM1
bp.650	GO:0006325	chromatin organization	Any process that results in the specification, formation or maintenance of the physical structure of eukaryotic chromatin.	BP	4.63435e-07	134	820	170688	1602382	0.000208328	51230	PHF20
bp.651	GO:0006325	chromatin organization	Any process that results in the specification, formation or maintenance of the physical structure of eukaryotic chromatin.	BP	4.63435e-07	134	820	170688	1602382	0.000208328	10541	ANP32B
bp.652	GO:0006325	chromatin organization	Any process that results in the specification, formation or maintenance of the physical structure of eukaryotic chromatin.	BP	4.63435e-07	134	820	170688	1602382	0.000208328	2625	GATA3
bp.653	GO:0006325	chromatin organization	Any process that results in the specification, formation or maintenance of the physical structure of eukaryotic chromatin.	BP	4.63435e-07	134	820	170688	1602382	0.000208328	8363	HIST1H4J
bp.654	GO:0006325	chromatin organization	Any process that results in the specification, formation or maintenance of the physical structure of eukaryotic chromatin.	BP	4.63435e-07	134	820	170688	1602382	0.000208328	4591	TRIM37
bp.655	GO:0006325	chromatin organization	Any process that results in the specification, formation or maintenance of the physical structure of eukaryotic chromatin.	BP	4.63435e-07	134	820	170688	1602382	0.000208328	8968	HIST1H3F
bp.656	GO:0006325	chromatin organization	Any process that results in the specification, formation or maintenance of the physical structure of eukaryotic chromatin.	BP	4.63435e-07	134	820	170688	1602382	0.000208328	128312	HIST3H2BB
bp.657	GO:0006325	chromatin organization	Any process that results in the specification, formation or maintenance of the physical structure of eukaryotic chromatin.	BP	4.63435e-07	134	820	170688	1602382	0.000208328	79723	SUV39H2
bp.658	GO:0006325	chromatin organization	Any process that results in the specification, formation or maintenance of the physical structure of eukaryotic chromatin.	BP	4.63435e-07	134	820	170688	1602382	0.000208328	23272	FAM208A
bp.659	GO:0006325	chromatin organization	Any process that results in the specification, formation or maintenance of the physical structure of eukaryotic chromatin.	BP	4.63435e-07	134	820	170688	1602382	0.000208328	83983	TSSK6
bp.660	GO:0006325	chromatin organization	Any process that results in the specification, formation or maintenance of the physical structure of eukaryotic chromatin.	BP	4.63435e-07	134	820	170688	1602382	0.000208328	84678	KDM2B
bp.661	GO:0006325	chromatin organization	Any process that results in the specification, formation or maintenance of the physical structure of eukaryotic chromatin.	BP	4.63435e-07	134	820	170688	1602382	0.000208328	5978	REST
bp.662	GO:0006325	chromatin organization	Any process that results in the specification, formation or maintenance of the physical structure of eukaryotic chromatin.	BP	4.63435e-07	134	820	170688	1602382	0.000208328	8351	HIST1H3D
bp.663	GO:0006325	chromatin organization	Any process that results in the specification, formation or maintenance of the physical structure of eukaryotic chromatin.	BP	4.63435e-07	134	820	170688	1602382	0.000208328	8348	HIST1H2BO
bp.664	GO:0006325	chromatin organization	Any process that results in the specification, formation or maintenance of the physical structure of eukaryotic chromatin.	BP	4.63435e-07	134	820	170688	1602382	0.000208328	150572	SMYD1
bp.665	GO:0006325	chromatin organization	Any process that results in the specification, formation or maintenance of the physical structure of eukaryotic chromatin.	BP	4.63435e-07	134	820	170688	1602382	0.000208328	8289	ARID1A
bp.666	GO:0006325	chromatin organization	Any process that results in the specification, formation or maintenance of the physical structure of eukaryotic chromatin.	BP	4.63435e-07	134	820	170688	1602382	0.000208328	8360	HIST1H4D
bp.667	GO:0006325	chromatin organization	Any process that results in the specification, formation or maintenance of the physical structure of eukaryotic chromatin.	BP	4.63435e-07	134	820	170688	1602382	0.000208328	6790	AURKA
bp.668	GO:0006325	chromatin organization	Any process that results in the specification, formation or maintenance of the physical structure of eukaryotic chromatin.	BP	4.63435e-07	134	820	170688	1602382	0.000208328	55209	SETD5
bp.669	GO:0006325	chromatin organization	Any process that results in the specification, formation or maintenance of the physical structure of eukaryotic chromatin.	BP	4.63435e-07	134	820	170688	1602382	0.000208328	8367	HIST1H4E
bp.670	GO:0006325	chromatin organization	Any process that results in the specification, formation or maintenance of the physical structure of eukaryotic chromatin.	BP	4.63435e-07	134	820	170688	1602382	0.000208328	5970	RELA
bp.671	GO:0006325	chromatin organization	Any process that results in the specification, formation or maintenance of the physical structure of eukaryotic chromatin.	BP	4.63435e-07	134	820	170688	1602382	0.000208328	6421	SFPQ
bp.672	GO:0006325	chromatin organization	Any process that results in the specification, formation or maintenance of the physical structure of eukaryotic chromatin.	BP	4.63435e-07	134	820	170688	1602382	0.000208328	22880	MORC2
bp.673	GO:0006325	chromatin organization	Any process that results in the specification, formation or maintenance of the physical structure of eukaryotic chromatin.	BP	4.63435e-07	134	820	170688	1602382	0.000208328	83439	TCF7L1
bp.674	GO:0006325	chromatin organization	Any process that results in the specification, formation or maintenance of the physical structure of eukaryotic chromatin.	BP	4.63435e-07	134	820	170688	1602382	0.000208328	3622	ING2
bp.675	GO:0006325	chromatin organization	Any process that results in the specification, formation or maintenance of the physical structure of eukaryotic chromatin.	BP	4.63435e-07	134	820	170688	1602382	0.000208328	29994	AC009961.3
bp.676	GO:0006325	chromatin organization	Any process that results in the specification, formation or maintenance of the physical structure of eukaryotic chromatin.	BP	4.63435e-07	134	820	170688	1602382	0.000208328	57673	BEND3
bp.677	GO:0006325	chromatin organization	Any process that results in the specification, formation or maintenance of the physical structure of eukaryotic chromatin.	BP	4.63435e-07	134	820	170688	1602382	0.000208328	7468	WHSC1
bp.678	GO:0006325	chromatin organization	Any process that results in the specification, formation or maintenance of the physical structure of eukaryotic chromatin.	BP	4.63435e-07	134	820	170688	1602382	0.000208328	10269	ZMPSTE24
bp.679	GO:0006325	chromatin organization	Any process that results in the specification, formation or maintenance of the physical structure of eukaryotic chromatin.	BP	4.63435e-07	134	820	170688	1602382	0.000208328	5933	RBL1
bp.680	GO:0006325	chromatin organization	Any process that results in the specification, formation or maintenance of the physical structure of eukaryotic chromatin.	BP	4.63435e-07	134	820	170688	1602382	0.000208328	1810	DR1
bp.681	GO:0006325	chromatin organization	Any process that results in the specification, formation or maintenance of the physical structure of eukaryotic chromatin.	BP	4.63435e-07	134	820	170688	1602382	0.000208328	51043	ZBTB7B
bp.682	GO:0006325	chromatin organization	Any process that results in the specification, formation or maintenance of the physical structure of eukaryotic chromatin.	BP	4.63435e-07	134	820	170688	1602382	0.000208328	891	CCNB1
bp.683	GO:0006325	chromatin organization	Any process that results in the specification, formation or maintenance of the physical structure of eukaryotic chromatin.	BP	4.63435e-07	134	820	170688	1602382	0.000208328	10984	KCNQ1OT1
bp.684	GO:0006325	chromatin organization	Any process that results in the specification, formation or maintenance of the physical structure of eukaryotic chromatin.	BP	4.63435e-07	134	820	170688	1602382	0.000208328	11335	CBX3
bp.685	GO:0006325	chromatin organization	Any process that results in the specification, formation or maintenance of the physical structure of eukaryotic chromatin.	BP	4.63435e-07	134	820	170688	1602382	0.000208328	8347	HIST1H2BC
bp.686	GO:0006325	chromatin organization	Any process that results in the specification, formation or maintenance of the physical structure of eukaryotic chromatin.	BP	4.63435e-07	134	820	170688	1602382	0.000208328	94104	PAXBP1
bp.687	GO:0006325	chromatin organization	Any process that results in the specification, formation or maintenance of the physical structure of eukaryotic chromatin.	BP	4.63435e-07	134	820	170688	1602382	0.000208328	3662	IRF4
bp.688	GO:0006325	chromatin organization	Any process that results in the specification, formation or maintenance of the physical structure of eukaryotic chromatin.	BP	4.63435e-07	134	820	170688	1602382	0.000208328	51176	LEF1
bp.689	GO:0006325	chromatin organization	Any process that results in the specification, formation or maintenance of the physical structure of eukaryotic chromatin.	BP	4.63435e-07	134	820	170688	1602382	0.000208328	11339	OIP5
bp.690	GO:0006325	chromatin organization	Any process that results in the specification, formation or maintenance of the physical structure of eukaryotic chromatin.	BP	4.63435e-07	134	820	170688	1602382	0.000208328	3146	HMGB1
bp.691	GO:0006325	chromatin organization	Any process that results in the specification, formation or maintenance of the physical structure of eukaryotic chromatin.	BP	4.63435e-07	134	820	170688	1602382	0.000208328	3159	HMGA1
bp.692	GO:0006325	chromatin organization	Any process that results in the specification, formation or maintenance of the physical structure of eukaryotic chromatin.	BP	4.63435e-07	134	820	170688	1602382	0.000208328	80205	CHD9
bp.693	GO:0006325	chromatin organization	Any process that results in the specification, formation or maintenance of the physical structure of eukaryotic chromatin.	BP	4.63435e-07	134	820	170688	1602382	0.000208328	55693	KDM4D
bp.694	GO:0006325	chromatin organization	Any process that results in the specification, formation or maintenance of the physical structure of eukaryotic chromatin.	BP	4.63435e-07	134	820	170688	1602382	0.000208328	55904	KMT2E
bp.695	GO:0006325	chromatin organization	Any process that results in the specification, formation or maintenance of the physical structure of eukaryotic chromatin.	BP	4.63435e-07	134	820	170688	1602382	0.000208328	58499	ZNF462
bp.696	GO:0006325	chromatin organization	Any process that results in the specification, formation or maintenance of the physical structure of eukaryotic chromatin.	BP	4.63435e-07	134	820	170688	1602382	0.000208328	80312	TET1
bp.697	GO:0006325	chromatin organization	Any process that results in the specification, formation or maintenance of the physical structure of eukaryotic chromatin.	BP	4.63435e-07	134	820	170688	1602382	0.000208328	8366	HIST1H4B
bp.698	GO:0006325	chromatin organization	Any process that results in the specification, formation or maintenance of the physical structure of eukaryotic chromatin.	BP	4.63435e-07	134	820	170688	1602382	0.000208328	8346	HIST1H2BI
bp.699	GO:0006325	chromatin organization	Any process that results in the specification, formation or maintenance of the physical structure of eukaryotic chromatin.	BP	4.63435e-07	134	820	170688	1602382	0.000208328	8861	LDB1
bp.700	GO:0006325	chromatin organization	Any process that results in the specification, formation or maintenance of the physical structure of eukaryotic chromatin.	BP	4.63435e-07	134	820	170688	1602382	0.000208328	63925	ZNF335
bp.701	GO:0006325	chromatin organization	Any process that results in the specification, formation or maintenance of the physical structure of eukaryotic chromatin.	BP	4.63435e-07	134	820	170688	1602382	0.000208328	8359	HIST1H4A
bp.702	GO:0006325	chromatin organization	Any process that results in the specification, formation or maintenance of the physical structure of eukaryotic chromatin.	BP	4.63435e-07	134	820	170688	1602382	0.000208328	6907	TBL1X
bp.703	GO:0006325	chromatin organization	Any process that results in the specification, formation or maintenance of the physical structure of eukaryotic chromatin.	BP	4.63435e-07	134	820	170688	1602382	0.000208328	8364	HIST1H4C
bp.704	GO:0006325	chromatin organization	Any process that results in the specification, formation or maintenance of the physical structure of eukaryotic chromatin.	BP	4.63435e-07	134	820	170688	1602382	0.000208328	8343	HIST1H2BF
bp.705	GO:0006325	chromatin organization	Any process that results in the specification, formation or maintenance of the physical structure of eukaryotic chromatin.	BP	4.63435e-07	134	820	170688	1602382	0.000208328	80314	EPC1
bp.706	GO:0006325	chromatin organization	Any process that results in the specification, formation or maintenance of the physical structure of eukaryotic chromatin.	BP	4.63435e-07	134	820	170688	1602382	0.000208328	55806	HR
bp.707	GO:0006325	chromatin organization	Any process that results in the specification, formation or maintenance of the physical structure of eukaryotic chromatin.	BP	4.63435e-07	134	820	170688	1602382	0.000208328	57050	UTP3
bp.708	GO:0006325	chromatin organization	Any process that results in the specification, formation or maintenance of the physical structure of eukaryotic chromatin.	BP	4.63435e-07	134	820	170688	1602382	0.000208328	64946	CENPH
bp.709	GO:0006325	chromatin organization	Any process that results in the specification, formation or maintenance of the physical structure of eukaryotic chromatin.	BP	4.63435e-07	134	820	170688	1602382	0.000208328	401541	CENPP
bp.710	GO:0006325	chromatin organization	Any process that results in the specification, formation or maintenance of the physical structure of eukaryotic chromatin.	BP	4.63435e-07	134	820	170688	1602382	0.000208328	5929	RBBP5
bp.711	GO:0006325	chromatin organization	Any process that results in the specification, formation or maintenance of the physical structure of eukaryotic chromatin.	BP	4.63435e-07	134	820	170688	1602382	0.000208328	7157	TP53
bp.712	GO:0006325	chromatin organization	Any process that results in the specification, formation or maintenance of the physical structure of eukaryotic chromatin.	BP	4.63435e-07	134	820	170688	1602382	0.000208328	26993	AKAP8L
bp.713	GO:0006325	chromatin organization	Any process that results in the specification, formation or maintenance of the physical structure of eukaryotic chromatin.	BP	4.63435e-07	134	820	170688	1602382	0.000208328	4300	MLLT3
bp.714	GO:0006325	chromatin organization	Any process that results in the specification, formation or maintenance of the physical structure of eukaryotic chromatin.	BP	4.63435e-07	134	820	170688	1602382	0.000208328	10361	NPM2
bp.715	GO:0006325	chromatin organization	Any process that results in the specification, formation or maintenance of the physical structure of eukaryotic chromatin.	BP	4.63435e-07	134	820	170688	1602382	0.000208328	8338	HIST2H2AC
bp.716	GO:0006325	chromatin organization	Any process that results in the specification, formation or maintenance of the physical structure of eukaryotic chromatin.	BP	4.63435e-07	134	820	170688	1602382	0.000208328	23304	UBR2
bp.717	GO:0006325	chromatin organization	Any process that results in the specification, formation or maintenance of the physical structure of eukaryotic chromatin.	BP	4.63435e-07	134	820	170688	1602382	0.000208328	8535	CBX4
bp.718	GO:0006325	chromatin organization	Any process that results in the specification, formation or maintenance of the physical structure of eukaryotic chromatin.	BP	4.63435e-07	134	820	170688	1602382	0.000208328	9958	USP15
bp.719	GO:0006325	chromatin organization	Any process that results in the specification, formation or maintenance of the physical structure of eukaryotic chromatin.	BP	4.63435e-07	134	820	170688	1602382	0.000208328	6591	SNAI2
bp.720	GO:0006325	chromatin organization	Any process that results in the specification, formation or maintenance of the physical structure of eukaryotic chromatin.	BP	4.63435e-07	134	820	170688	1602382	0.000208328	3171	FOXA3
bp.721	GO:0006325	chromatin organization	Any process that results in the specification, formation or maintenance of the physical structure of eukaryotic chromatin.	BP	4.63435e-07	134	820	170688	1602382	0.000208328	5252	PHF1
bp.722	GO:0006325	chromatin organization	Any process that results in the specification, formation or maintenance of the physical structure of eukaryotic chromatin.	BP	4.63435e-07	134	820	170688	1602382	0.000208328	5079	PAX5
bp.723	GO:0006325	chromatin organization	Any process that results in the specification, formation or maintenance of the physical structure of eukaryotic chromatin.	BP	4.63435e-07	134	820	170688	1602382	0.000208328	8091	HMGA2
bp.724	GO:0006325	chromatin organization	Any process that results in the specification, formation or maintenance of the physical structure of eukaryotic chromatin.	BP	4.63435e-07	134	820	170688	1602382	0.000208328	55193	PBRM1
bp.725	GO:0006325	chromatin organization	Any process that results in the specification, formation or maintenance of the physical structure of eukaryotic chromatin.	BP	4.63435e-07	134	820	170688	1602382	0.000208328	5081	PAX7
bp.726	GO:0006325	chromatin organization	Any process that results in the specification, formation or maintenance of the physical structure of eukaryotic chromatin.	BP	4.63435e-07	134	820	170688	1602382	0.000208328	8334	HIST1H2AC
bp.727	GO:0006325	chromatin organization	Any process that results in the specification, formation or maintenance of the physical structure of eukaryotic chromatin.	BP	4.63435e-07	134	820	170688	1602382	0.000208328	8332	HIST1H2AL
bp.728	GO:0006325	chromatin organization	Any process that results in the specification, formation or maintenance of the physical structure of eukaryotic chromatin.	BP	4.63435e-07	134	820	170688	1602382	0.000208328	9960	USP3
bp.729	GO:0006325	chromatin organization	Any process that results in the specification, formation or maintenance of the physical structure of eukaryotic chromatin.	BP	4.63435e-07	134	820	170688	1602382	0.000208328	8330	HIST1H2AK
bp.730	GO:0006325	chromatin organization	Any process that results in the specification, formation or maintenance of the physical structure of eukaryotic chromatin.	BP	4.63435e-07	134	820	170688	1602382	0.000208328	3012	HIST1H2AE
bp.731	GO:0006325	chromatin organization	Any process that results in the specification, formation or maintenance of the physical structure of eukaryotic chromatin.	BP	4.63435e-07	134	820	170688	1602382	0.000208328	64710	NUCKS1
bp.732	GO:0006325	chromatin organization	Any process that results in the specification, formation or maintenance of the physical structure of eukaryotic chromatin.	BP	4.63435e-07	134	820	170688	1602382	0.000208328	4485	MST1
bp.733	GO:0006325	chromatin organization	Any process that results in the specification, formation or maintenance of the physical structure of eukaryotic chromatin.	BP	4.63435e-07	134	820	170688	1602382	0.000208328	3720	JARID2
bp.734	GO:0006325	chromatin organization	Any process that results in the specification, formation or maintenance of the physical structure of eukaryotic chromatin.	BP	4.63435e-07	134	820	170688	1602382	0.000208328	22823	MTF2
bp.735	GO:0006325	chromatin organization	Any process that results in the specification, formation or maintenance of the physical structure of eukaryotic chromatin.	BP	4.63435e-07	134	820	170688	1602382	0.000208328	148479	PHF13
bp.736	GO:0006325	chromatin organization	Any process that results in the specification, formation or maintenance of the physical structure of eukaryotic chromatin.	BP	4.63435e-07	134	820	170688	1602382	0.000208328	83852	SETDB2
bp.737	GO:0006325	chromatin organization	Any process that results in the specification, formation or maintenance of the physical structure of eukaryotic chromatin.	BP	4.63435e-07	134	820	170688	1602382	0.000208328	8345	HIST1H2BH
bp.738	GO:0006325	chromatin organization	Any process that results in the specification, formation or maintenance of the physical structure of eukaryotic chromatin.	BP	4.63435e-07	134	820	170688	1602382	0.000208328	8648	NCOA1
bp.739	GO:0006325	chromatin organization	Any process that results in the specification, formation or maintenance of the physical structure of eukaryotic chromatin.	BP	4.63435e-07	134	820	170688	1602382	0.000208328	54107	POLE3
bp.740	GO:0006325	chromatin organization	Any process that results in the specification, formation or maintenance of the physical structure of eukaryotic chromatin.	BP	4.63435e-07	134	820	170688	1602382	0.000208328	55723	ASF1B
bp.741	GO:0006325	chromatin organization	Any process that results in the specification, formation or maintenance of the physical structure of eukaryotic chromatin.	BP	4.63435e-07	134	820	170688	1602382	0.000208328	55809	TRERF1
bp.742	GO:0006325	chromatin organization	Any process that results in the specification, formation or maintenance of the physical structure of eukaryotic chromatin.	BP	4.63435e-07	134	820	170688	1602382	0.000208328	9555	H2AFY
bp.743	GO:0006325	chromatin organization	Any process that results in the specification, formation or maintenance of the physical structure of eukaryotic chromatin.	BP	4.63435e-07	134	820	170688	1602382	0.000208328	83444	INO80B
bp.744	GO:0006325	chromatin organization	Any process that results in the specification, formation or maintenance of the physical structure of eukaryotic chromatin.	BP	4.63435e-07	134	820	170688	1602382	0.000208328	57082	KNL1
bp.745	GO:0006325	chromatin organization	Any process that results in the specification, formation or maintenance of the physical structure of eukaryotic chromatin.	BP	4.63435e-07	134	820	170688	1602382	0.000208328	4302	MLLT6
bp.746	GO:0006325	chromatin organization	Any process that results in the specification, formation or maintenance of the physical structure of eukaryotic chromatin.	BP	4.63435e-07	134	820	170688	1602382	0.000208328	7994	KAT6A
bp.747	GO:0006325	chromatin organization	Any process that results in the specification, formation or maintenance of the physical structure of eukaryotic chromatin.	BP	4.63435e-07	134	820	170688	1602382	0.000208328	55355	HJURP
bp.748	GO:0006325	chromatin organization	Any process that results in the specification, formation or maintenance of the physical structure of eukaryotic chromatin.	BP	4.63435e-07	134	820	170688	1602382	0.000208328	8085	KMT2D
bp.749	GO:0006325	chromatin organization	Any process that results in the specification, formation or maintenance of the physical structure of eukaryotic chromatin.	BP	4.63435e-07	134	820	170688	1602382	0.000208328	11143	KAT7
bp.750	GO:0006325	chromatin organization	Any process that results in the specification, formation or maintenance of the physical structure of eukaryotic chromatin.	BP	4.63435e-07	134	820	170688	1602382	0.000208328	51742	ARID4B
bp.751	GO:0006325	chromatin organization	Any process that results in the specification, formation or maintenance of the physical structure of eukaryotic chromatin.	BP	4.63435e-07	134	820	170688	1602382	0.000208328	817	CAMK2D
bp.752	GO:0006325	chromatin organization	Any process that results in the specification, formation or maintenance of the physical structure of eukaryotic chromatin.	BP	4.63435e-07	134	820	170688	1602382	0.000208328	2908	NR3C1
bp.753	GO:0006325	chromatin organization	Any process that results in the specification, formation or maintenance of the physical structure of eukaryotic chromatin.	BP	4.63435e-07	134	820	170688	1602382	0.000208328	4609	MYC
bp.754	GO:0006325	chromatin organization	Any process that results in the specification, formation or maintenance of the physical structure of eukaryotic chromatin.	BP	4.63435e-07	134	820	170688	1602382	0.000208328	3017	HIST1H2BD
bp.755	GO:0006325	chromatin organization	Any process that results in the specification, formation or maintenance of the physical structure of eukaryotic chromatin.	BP	4.63435e-07	134	820	170688	1602382	0.000208328	8339	HIST1H2BG
bp.756	GO:0006325	chromatin organization	Any process that results in the specification, formation or maintenance of the physical structure of eukaryotic chromatin.	BP	4.63435e-07	134	820	170688	1602382	0.000208328	54556	ING3
bp.757	GO:0006325	chromatin organization	Any process that results in the specification, formation or maintenance of the physical structure of eukaryotic chromatin.	BP	4.63435e-07	134	820	170688	1602382	0.000208328	9733	SART3
bp.758	GO:0006325	chromatin organization	Any process that results in the specification, formation or maintenance of the physical structure of eukaryotic chromatin.	BP	4.63435e-07	134	820	170688	1602382	0.000208328	4297	KMT2A
bp.759	GO:0006325	chromatin organization	Any process that results in the specification, formation or maintenance of the physical structure of eukaryotic chromatin.	BP	4.63435e-07	134	820	170688	1602382	0.000208328	8202	NCOA3
bp.760	GO:0006325	chromatin organization	Any process that results in the specification, formation or maintenance of the physical structure of eukaryotic chromatin.	BP	4.63435e-07	134	820	170688	1602382	0.000208328	6885	MAP3K7
bp.761	GO:0006325	chromatin organization	Any process that results in the specification, formation or maintenance of the physical structure of eukaryotic chromatin.	BP	4.63435e-07	134	820	170688	1602382	0.000208328	83903	GSG2
bp.762	GO:0006325	chromatin organization	Any process that results in the specification, formation or maintenance of the physical structure of eukaryotic chromatin.	BP	4.63435e-07	134	820	170688	1602382	0.000208328	79960	JADE1
bp.763	GO:0006325	chromatin organization	Any process that results in the specification, formation or maintenance of the physical structure of eukaryotic chromatin.	BP	4.63435e-07	134	820	170688	1602382	0.000208328	79366	HMGN5
bp.764	GO:0006325	chromatin organization	Any process that results in the specification, formation or maintenance of the physical structure of eukaryotic chromatin.	BP	4.63435e-07	134	820	170688	1602382	0.000208328	196528	ARID2
bp.765	GO:0006325	chromatin organization	Any process that results in the specification, formation or maintenance of the physical structure of eukaryotic chromatin.	BP	4.63435e-07	134	820	170688	1602382	0.000208328	56943	ENY2
bp.766	GO:0006325	chromatin organization	Any process that results in the specification, formation or maintenance of the physical structure of eukaryotic chromatin.	BP	4.63435e-07	134	820	170688	1602382	0.000208328	7862	BRPF1
bp.767	GO:0006325	chromatin organization	Any process that results in the specification, formation or maintenance of the physical structure of eukaryotic chromatin.	BP	4.63435e-07	134	820	170688	1602382	0.000208328	79682	CENPU
bp.768	GO:0006325	chromatin organization	Any process that results in the specification, formation or maintenance of the physical structure of eukaryotic chromatin.	BP	4.63435e-07	134	820	170688	1602382	0.000208328	8336	HIST1H2AM
bp.769	GO:0006325	chromatin organization	Any process that results in the specification, formation or maintenance of the physical structure of eukaryotic chromatin.	BP	4.63435e-07	134	820	170688	1602382	0.000208328	7917	BAG6
bp.770	GO:0006325	chromatin organization	Any process that results in the specification, formation or maintenance of the physical structure of eukaryotic chromatin.	BP	4.63435e-07	134	820	170688	1602382	0.000208328	283248	RCOR2
bp.771	GO:0006325	chromatin organization	Any process that results in the specification, formation or maintenance of the physical structure of eukaryotic chromatin.	BP	4.63435e-07	134	820	170688	1602382	0.000208328	51366	UBR5
bp.772	GO:0006325	chromatin organization	Any process that results in the specification, formation or maintenance of the physical structure of eukaryotic chromatin.	BP	4.63435e-07	134	820	170688	1602382	0.000208328	54784	ALKBH4
bp.773	GO:0006325	chromatin organization	Any process that results in the specification, formation or maintenance of the physical structure of eukaryotic chromatin.	BP	4.63435e-07	134	820	170688	1602382	0.000208328	8349	HIST2H2BE
bp.774	GO:0006325	chromatin organization	Any process that results in the specification, formation or maintenance of the physical structure of eukaryotic chromatin.	BP	4.63435e-07	134	820	170688	1602382	0.000208328	8110	DPF3
bp.775	GO:0006325	chromatin organization	Any process that results in the specification, formation or maintenance of the physical structure of eukaryotic chromatin.	BP	4.63435e-07	134	820	170688	1602382	0.000208328	55196	KIAA1551
bp.776	GO:0006325	chromatin organization	Any process that results in the specification, formation or maintenance of the physical structure of eukaryotic chromatin.	BP	4.63435e-07	134	820	170688	1602382	0.000208328	5245	PHB
bp.777	GO:0006325	chromatin organization	Any process that results in the specification, formation or maintenance of the physical structure of eukaryotic chromatin.	BP	4.63435e-07	134	820	170688	1602382	0.000208328	7320	UBE2B
bp.778	GO:0006325	chromatin organization	Any process that results in the specification, formation or maintenance of the physical structure of eukaryotic chromatin.	BP	4.63435e-07	134	820	170688	1602382	0.000208328	3015	H2AFZ
bp.779	GO:0006325	chromatin organization	Any process that results in the specification, formation or maintenance of the physical structure of eukaryotic chromatin.	BP	4.63435e-07	134	820	170688	1602382	0.000208328	79885	HDAC11
bp.780	GO:0006325	chromatin organization	Any process that results in the specification, formation or maintenance of the physical structure of eukaryotic chromatin.	BP	4.63435e-07	134	820	170688	1602382	0.000208328	84312	BRMS1L
bp.781	GO:0006974	cellular response to DNA damage stimulus	Any process that results in a change in state or activity of a cell (in terms of movement, secretion, enzyme production, gene expression, etc.) as a result of a stimulus indicating damage to its DNA from environmental insults or errors during metabolism.	BP	4.96836e-06	135	865	170688	1602382	0.00108696	5252	PHF1
bp.782	GO:0006974	cellular response to DNA damage stimulus	Any process that results in a change in state or activity of a cell (in terms of movement, secretion, enzyme production, gene expression, etc.) as a result of a stimulus indicating damage to its DNA from environmental insults or errors during metabolism.	BP	4.96836e-06	135	865	170688	1602382	0.00108696	5980	REV3L
bp.783	GO:0006974	cellular response to DNA damage stimulus	Any process that results in a change in state or activity of a cell (in terms of movement, secretion, enzyme production, gene expression, etc.) as a result of a stimulus indicating damage to its DNA from environmental insults or errors during metabolism.	BP	4.96836e-06	135	865	170688	1602382	0.00108696	8364	HIST1H4C
bp.784	GO:0006974	cellular response to DNA damage stimulus	Any process that results in a change in state or activity of a cell (in terms of movement, secretion, enzyme production, gene expression, etc.) as a result of a stimulus indicating damage to its DNA from environmental insults or errors during metabolism.	BP	4.96836e-06	135	865	170688	1602382	0.00108696	4487	MSX1
bp.785	GO:0006974	cellular response to DNA damage stimulus	Any process that results in a change in state or activity of a cell (in terms of movement, secretion, enzyme production, gene expression, etc.) as a result of a stimulus indicating damage to its DNA from environmental insults or errors during metabolism.	BP	4.96836e-06	135	865	170688	1602382	0.00108696	4174	MCM5
bp.786	GO:0006974	cellular response to DNA damage stimulus	Any process that results in a change in state or activity of a cell (in terms of movement, secretion, enzyme production, gene expression, etc.) as a result of a stimulus indicating damage to its DNA from environmental insults or errors during metabolism.	BP	4.96836e-06	135	865	170688	1602382	0.00108696	55693	KDM4D
bp.787	GO:0006974	cellular response to DNA damage stimulus	Any process that results in a change in state or activity of a cell (in terms of movement, secretion, enzyme production, gene expression, etc.) as a result of a stimulus indicating damage to its DNA from environmental insults or errors during metabolism.	BP	4.96836e-06	135	865	170688	1602382	0.00108696	2794	GNL1
bp.788	GO:0006974	cellular response to DNA damage stimulus	Any process that results in a change in state or activity of a cell (in terms of movement, secretion, enzyme production, gene expression, etc.) as a result of a stimulus indicating damage to its DNA from environmental insults or errors during metabolism.	BP	4.96836e-06	135	865	170688	1602382	0.00108696	200734	SPRED2
bp.789	GO:0006974	cellular response to DNA damage stimulus	Any process that results in a change in state or activity of a cell (in terms of movement, secretion, enzyme production, gene expression, etc.) as a result of a stimulus indicating damage to its DNA from environmental insults or errors during metabolism.	BP	4.96836e-06	135	865	170688	1602382	0.00108696	8367	HIST1H4E
bp.790	GO:0006974	cellular response to DNA damage stimulus	Any process that results in a change in state or activity of a cell (in terms of movement, secretion, enzyme production, gene expression, etc.) as a result of a stimulus indicating damage to its DNA from environmental insults or errors during metabolism.	BP	4.96836e-06	135	865	170688	1602382	0.00108696	9960	USP3
bp.791	GO:0006974	cellular response to DNA damage stimulus	Any process that results in a change in state or activity of a cell (in terms of movement, secretion, enzyme production, gene expression, etc.) as a result of a stimulus indicating damage to its DNA from environmental insults or errors during metabolism.	BP	4.96836e-06	135	865	170688	1602382	0.00108696	755	C21orf2
bp.792	GO:0006974	cellular response to DNA damage stimulus	Any process that results in a change in state or activity of a cell (in terms of movement, secretion, enzyme production, gene expression, etc.) as a result of a stimulus indicating damage to its DNA from environmental insults or errors during metabolism.	BP	4.96836e-06	135	865	170688	1602382	0.00108696	7468	WHSC1
bp.793	GO:0006974	cellular response to DNA damage stimulus	Any process that results in a change in state or activity of a cell (in terms of movement, secretion, enzyme production, gene expression, etc.) as a result of a stimulus indicating damage to its DNA from environmental insults or errors during metabolism.	BP	4.96836e-06	135	865	170688	1602382	0.00108696	161742	SPRED1
bp.794	GO:0006974	cellular response to DNA damage stimulus	Any process that results in a change in state or activity of a cell (in terms of movement, secretion, enzyme production, gene expression, etc.) as a result of a stimulus indicating damage to its DNA from environmental insults or errors during metabolism.	BP	4.96836e-06	135	865	170688	1602382	0.00108696	8738	CRADD
bp.795	GO:0006974	cellular response to DNA damage stimulus	Any process that results in a change in state or activity of a cell (in terms of movement, secretion, enzyme production, gene expression, etc.) as a result of a stimulus indicating damage to its DNA from environmental insults or errors during metabolism.	BP	4.96836e-06	135	865	170688	1602382	0.00108696	9126	SMC3
bp.796	GO:0006974	cellular response to DNA damage stimulus	Any process that results in a change in state or activity of a cell (in terms of movement, secretion, enzyme production, gene expression, etc.) as a result of a stimulus indicating damage to its DNA from environmental insults or errors during metabolism.	BP	4.96836e-06	135	865	170688	1602382	0.00108696	5426	POLE
bp.797	GO:0006974	cellular response to DNA damage stimulus	Any process that results in a change in state or activity of a cell (in terms of movement, secretion, enzyme production, gene expression, etc.) as a result of a stimulus indicating damage to its DNA from environmental insults or errors during metabolism.	BP	4.96836e-06	135	865	170688	1602382	0.00108696	55571	CNOT11
bp.798	GO:0006974	cellular response to DNA damage stimulus	Any process that results in a change in state or activity of a cell (in terms of movement, secretion, enzyme production, gene expression, etc.) as a result of a stimulus indicating damage to its DNA from environmental insults or errors during metabolism.	BP	4.96836e-06	135	865	170688	1602382	0.00108696	79073	TMEM109
bp.799	GO:0006974	cellular response to DNA damage stimulus	Any process that results in a change in state or activity of a cell (in terms of movement, secretion, enzyme production, gene expression, etc.) as a result of a stimulus indicating damage to its DNA from environmental insults or errors during metabolism.	BP	4.96836e-06	135	865	170688	1602382	0.00108696	149840	C20orf196
bp.800	GO:0006974	cellular response to DNA damage stimulus	Any process that results in a change in state or activity of a cell (in terms of movement, secretion, enzyme production, gene expression, etc.) as a result of a stimulus indicating damage to its DNA from environmental insults or errors during metabolism.	BP	4.96836e-06	135	865	170688	1602382	0.00108696	891	CCNB1
bp.801	GO:0006974	cellular response to DNA damage stimulus	Any process that results in a change in state or activity of a cell (in terms of movement, secretion, enzyme production, gene expression, etc.) as a result of a stimulus indicating damage to its DNA from environmental insults or errors during metabolism.	BP	4.96836e-06	135	865	170688	1602382	0.00108696	23049	SMG1
bp.802	GO:0006974	cellular response to DNA damage stimulus	Any process that results in a change in state or activity of a cell (in terms of movement, secretion, enzyme production, gene expression, etc.) as a result of a stimulus indicating damage to its DNA from environmental insults or errors during metabolism.	BP	4.96836e-06	135	865	170688	1602382	0.00108696	5893	RAD52
bp.803	GO:0006974	cellular response to DNA damage stimulus	Any process that results in a change in state or activity of a cell (in terms of movement, secretion, enzyme production, gene expression, etc.) as a result of a stimulus indicating damage to its DNA from environmental insults or errors during metabolism.	BP	4.96836e-06	135	865	170688	1602382	0.00108696	6118	RPA2
bp.804	GO:0006974	cellular response to DNA damage stimulus	Any process that results in a change in state or activity of a cell (in terms of movement, secretion, enzyme production, gene expression, etc.) as a result of a stimulus indicating damage to its DNA from environmental insults or errors during metabolism.	BP	4.96836e-06	135	865	170688	1602382	0.00108696	2969	GTF2I
bp.805	GO:0006974	cellular response to DNA damage stimulus	Any process that results in a change in state or activity of a cell (in terms of movement, secretion, enzyme production, gene expression, etc.) as a result of a stimulus indicating damage to its DNA from environmental insults or errors during metabolism.	BP	4.96836e-06	135	865	170688	1602382	0.00108696	8366	HIST1H4B
bp.806	GO:0006974	cellular response to DNA damage stimulus	Any process that results in a change in state or activity of a cell (in terms of movement, secretion, enzyme production, gene expression, etc.) as a result of a stimulus indicating damage to its DNA from environmental insults or errors during metabolism.	BP	4.96836e-06	135	865	170688	1602382	0.00108696	11335	CBX3
bp.807	GO:0006974	cellular response to DNA damage stimulus	Any process that results in a change in state or activity of a cell (in terms of movement, secretion, enzyme production, gene expression, etc.) as a result of a stimulus indicating damage to its DNA from environmental insults or errors during metabolism.	BP	4.96836e-06	135	865	170688	1602382	0.00108696	83444	INO80B
bp.808	GO:0006974	cellular response to DNA damage stimulus	Any process that results in a change in state or activity of a cell (in terms of movement, secretion, enzyme production, gene expression, etc.) as a result of a stimulus indicating damage to its DNA from environmental insults or errors during metabolism.	BP	4.96836e-06	135	865	170688	1602382	0.00108696	84939	MUM1
bp.809	GO:0006974	cellular response to DNA damage stimulus	Any process that results in a change in state or activity of a cell (in terms of movement, secretion, enzyme production, gene expression, etc.) as a result of a stimulus indicating damage to its DNA from environmental insults or errors during metabolism.	BP	4.96836e-06	135	865	170688	1602382	0.00108696	124739	USP43
bp.810	GO:0006974	cellular response to DNA damage stimulus	Any process that results in a change in state or activity of a cell (in terms of movement, secretion, enzyme production, gene expression, etc.) as a result of a stimulus indicating damage to its DNA from environmental insults or errors during metabolism.	BP	4.96836e-06	135	865	170688	1602382	0.00108696	4193	MDM2
bp.811	GO:0006974	cellular response to DNA damage stimulus	Any process that results in a change in state or activity of a cell (in terms of movement, secretion, enzyme production, gene expression, etc.) as a result of a stimulus indicating damage to its DNA from environmental insults or errors during metabolism.	BP	4.96836e-06	135	865	170688	1602382	0.00108696	84446	BRSK1
bp.812	GO:0006974	cellular response to DNA damage stimulus	Any process that results in a change in state or activity of a cell (in terms of movement, secretion, enzyme production, gene expression, etc.) as a result of a stimulus indicating damage to its DNA from environmental insults or errors during metabolism.	BP	4.96836e-06	135	865	170688	1602382	0.00108696	835	CASP2
bp.813	GO:0006974	cellular response to DNA damage stimulus	Any process that results in a change in state or activity of a cell (in terms of movement, secretion, enzyme production, gene expression, etc.) as a result of a stimulus indicating damage to its DNA from environmental insults or errors during metabolism.	BP	4.96836e-06	135	865	170688	1602382	0.00108696	92667	MGME1
bp.814	GO:0006974	cellular response to DNA damage stimulus	Any process that results in a change in state or activity of a cell (in terms of movement, secretion, enzyme production, gene expression, etc.) as a result of a stimulus indicating damage to its DNA from environmental insults or errors during metabolism.	BP	4.96836e-06	135	865	170688	1602382	0.00108696	1649	DDIT3
bp.815	GO:0006974	cellular response to DNA damage stimulus	Any process that results in a change in state or activity of a cell (in terms of movement, secretion, enzyme production, gene expression, etc.) as a result of a stimulus indicating damage to its DNA from environmental insults or errors during metabolism.	BP	4.96836e-06	135	865	170688	1602382	0.00108696	6421	SFPQ
bp.816	GO:0006974	cellular response to DNA damage stimulus	Any process that results in a change in state or activity of a cell (in terms of movement, secretion, enzyme production, gene expression, etc.) as a result of a stimulus indicating damage to its DNA from environmental insults or errors during metabolism.	BP	4.96836e-06	135	865	170688	1602382	0.00108696	64710	NUCKS1
bp.817	GO:0006974	cellular response to DNA damage stimulus	Any process that results in a change in state or activity of a cell (in terms of movement, secretion, enzyme production, gene expression, etc.) as a result of a stimulus indicating damage to its DNA from environmental insults or errors during metabolism.	BP	4.96836e-06	135	865	170688	1602382	0.00108696	7157	TP53
bp.818	GO:0006974	cellular response to DNA damage stimulus	Any process that results in a change in state or activity of a cell (in terms of movement, secretion, enzyme production, gene expression, etc.) as a result of a stimulus indicating damage to its DNA from environmental insults or errors during metabolism.	BP	4.96836e-06	135	865	170688	1602382	0.00108696	7917	BAG6
bp.819	GO:0006974	cellular response to DNA damage stimulus	Any process that results in a change in state or activity of a cell (in terms of movement, secretion, enzyme production, gene expression, etc.) as a result of a stimulus indicating damage to its DNA from environmental insults or errors during metabolism.	BP	4.96836e-06	135	865	170688	1602382	0.00108696	57805	CCAR2
bp.820	GO:0006974	cellular response to DNA damage stimulus	Any process that results in a change in state or activity of a cell (in terms of movement, secretion, enzyme production, gene expression, etc.) as a result of a stimulus indicating damage to its DNA from environmental insults or errors during metabolism.	BP	4.96836e-06	135	865	170688	1602382	0.00108696	11232	POLG2
bp.821	GO:0006974	cellular response to DNA damage stimulus	Any process that results in a change in state or activity of a cell (in terms of movement, secretion, enzyme production, gene expression, etc.) as a result of a stimulus indicating damage to its DNA from environmental insults or errors during metabolism.	BP	4.96836e-06	135	865	170688	1602382	0.00108696	1820	ARID3A
bp.822	GO:0006974	cellular response to DNA damage stimulus	Any process that results in a change in state or activity of a cell (in terms of movement, secretion, enzyme production, gene expression, etc.) as a result of a stimulus indicating damage to its DNA from environmental insults or errors during metabolism.	BP	4.96836e-06	135	865	170688	1602382	0.00108696	26574	AATF
bp.823	GO:0006974	cellular response to DNA damage stimulus	Any process that results in a change in state or activity of a cell (in terms of movement, secretion, enzyme production, gene expression, etc.) as a result of a stimulus indicating damage to its DNA from environmental insults or errors during metabolism.	BP	4.96836e-06	135	865	170688	1602382	0.00108696	3622	ING2
bp.824	GO:0006974	cellular response to DNA damage stimulus	Any process that results in a change in state or activity of a cell (in terms of movement, secretion, enzyme production, gene expression, etc.) as a result of a stimulus indicating damage to its DNA from environmental insults or errors during metabolism.	BP	4.96836e-06	135	865	170688	1602382	0.00108696	8363	HIST1H4J
bp.825	GO:0006974	cellular response to DNA damage stimulus	Any process that results in a change in state or activity of a cell (in terms of movement, secretion, enzyme production, gene expression, etc.) as a result of a stimulus indicating damage to its DNA from environmental insults or errors during metabolism.	BP	4.96836e-06	135	865	170688	1602382	0.00108696	8360	HIST1H4D
bp.826	GO:0006974	cellular response to DNA damage stimulus	Any process that results in a change in state or activity of a cell (in terms of movement, secretion, enzyme production, gene expression, etc.) as a result of a stimulus indicating damage to its DNA from environmental insults or errors during metabolism.	BP	4.96836e-06	135	865	170688	1602382	0.00108696	5929	RBBP5
bp.827	GO:0006974	cellular response to DNA damage stimulus	Any process that results in a change in state or activity of a cell (in terms of movement, secretion, enzyme production, gene expression, etc.) as a result of a stimulus indicating damage to its DNA from environmental insults or errors during metabolism.	BP	4.96836e-06	135	865	170688	1602382	0.00108696	56658	TRIM39
bp.828	GO:0006974	cellular response to DNA damage stimulus	Any process that results in a change in state or activity of a cell (in terms of movement, secretion, enzyme production, gene expression, etc.) as a result of a stimulus indicating damage to its DNA from environmental insults or errors during metabolism.	BP	4.96836e-06	135	865	170688	1602382	0.00108696	51147	ING4
bp.829	GO:0006974	cellular response to DNA damage stimulus	Any process that results in a change in state or activity of a cell (in terms of movement, secretion, enzyme production, gene expression, etc.) as a result of a stimulus indicating damage to its DNA from environmental insults or errors during metabolism.	BP	4.96836e-06	135	865	170688	1602382	0.00108696	84930	MASTL
bp.830	GO:0006974	cellular response to DNA damage stimulus	Any process that results in a change in state or activity of a cell (in terms of movement, secretion, enzyme production, gene expression, etc.) as a result of a stimulus indicating damage to its DNA from environmental insults or errors during metabolism.	BP	4.96836e-06	135	865	170688	1602382	0.00108696	196528	ARID2
bp.831	GO:0006974	cellular response to DNA damage stimulus	Any process that results in a change in state or activity of a cell (in terms of movement, secretion, enzyme production, gene expression, etc.) as a result of a stimulus indicating damage to its DNA from environmental insults or errors during metabolism.	BP	4.96836e-06	135	865	170688	1602382	0.00108696	7317	UBA1
bp.832	GO:0006974	cellular response to DNA damage stimulus	Any process that results in a change in state or activity of a cell (in terms of movement, secretion, enzyme production, gene expression, etc.) as a result of a stimulus indicating damage to its DNA from environmental insults or errors during metabolism.	BP	4.96836e-06	135	865	170688	1602382	0.00108696	10463	SLC30A9
bp.833	GO:0006974	cellular response to DNA damage stimulus	Any process that results in a change in state or activity of a cell (in terms of movement, secretion, enzyme production, gene expression, etc.) as a result of a stimulus indicating damage to its DNA from environmental insults or errors during metabolism.	BP	4.96836e-06	135	865	170688	1602382	0.00108696	10116	FEM1B
bp.834	GO:0006974	cellular response to DNA damage stimulus	Any process that results in a change in state or activity of a cell (in terms of movement, secretion, enzyme production, gene expression, etc.) as a result of a stimulus indicating damage to its DNA from environmental insults or errors during metabolism.	BP	4.96836e-06	135	865	170688	1602382	0.00108696	6423	SFRP2
bp.835	GO:0006974	cellular response to DNA damage stimulus	Any process that results in a change in state or activity of a cell (in terms of movement, secretion, enzyme production, gene expression, etc.) as a result of a stimulus indicating damage to its DNA from environmental insults or errors during metabolism.	BP	4.96836e-06	135	865	170688	1602382	0.00108696	64782	AEN
bp.836	GO:0006974	cellular response to DNA damage stimulus	Any process that results in a change in state or activity of a cell (in terms of movement, secretion, enzyme production, gene expression, etc.) as a result of a stimulus indicating damage to its DNA from environmental insults or errors during metabolism.	BP	4.96836e-06	135	865	170688	1602382	0.00108696	3428	IFI16
bp.837	GO:0006974	cellular response to DNA damage stimulus	Any process that results in a change in state or activity of a cell (in terms of movement, secretion, enzyme production, gene expression, etc.) as a result of a stimulus indicating damage to its DNA from environmental insults or errors during metabolism.	BP	4.96836e-06	135	865	170688	1602382	0.00108696	9636	ISG15
bp.838	GO:0006974	cellular response to DNA damage stimulus	Any process that results in a change in state or activity of a cell (in terms of movement, secretion, enzyme production, gene expression, etc.) as a result of a stimulus indicating damage to its DNA from environmental insults or errors during metabolism.	BP	4.96836e-06	135	865	170688	1602382	0.00108696	9768	KIAA0101
bp.839	GO:0006974	cellular response to DNA damage stimulus	Any process that results in a change in state or activity of a cell (in terms of movement, secretion, enzyme production, gene expression, etc.) as a result of a stimulus indicating damage to its DNA from environmental insults or errors during metabolism.	BP	4.96836e-06	135	865	170688	1602382	0.00108696	55218	EXD2
bp.840	GO:0006974	cellular response to DNA damage stimulus	Any process that results in a change in state or activity of a cell (in terms of movement, secretion, enzyme production, gene expression, etc.) as a result of a stimulus indicating damage to its DNA from environmental insults or errors during metabolism.	BP	4.96836e-06	135	865	170688	1602382	0.00108696	23503	ZFYVE26
bp.841	GO:0006974	cellular response to DNA damage stimulus	Any process that results in a change in state or activity of a cell (in terms of movement, secretion, enzyme production, gene expression, etc.) as a result of a stimulus indicating damage to its DNA from environmental insults or errors during metabolism.	BP	4.96836e-06	135	865	170688	1602382	0.00108696	4609	MYC
bp.842	GO:0006974	cellular response to DNA damage stimulus	Any process that results in a change in state or activity of a cell (in terms of movement, secretion, enzyme production, gene expression, etc.) as a result of a stimulus indicating damage to its DNA from environmental insults or errors during metabolism.	BP	4.96836e-06	135	865	170688	1602382	0.00108696	28996	HIPK2
bp.843	GO:0006974	cellular response to DNA damage stimulus	Any process that results in a change in state or activity of a cell (in terms of movement, secretion, enzyme production, gene expression, etc.) as a result of a stimulus indicating damage to its DNA from environmental insults or errors during metabolism.	BP	4.96836e-06	135	865	170688	1602382	0.00108696	5591	PRKDC
bp.844	GO:0006974	cellular response to DNA damage stimulus	Any process that results in a change in state or activity of a cell (in terms of movement, secretion, enzyme production, gene expression, etc.) as a result of a stimulus indicating damage to its DNA from environmental insults or errors during metabolism.	BP	4.96836e-06	135	865	170688	1602382	0.00108696	113130	CDCA5
bp.845	GO:0006974	cellular response to DNA damage stimulus	Any process that results in a change in state or activity of a cell (in terms of movement, secretion, enzyme production, gene expression, etc.) as a result of a stimulus indicating damage to its DNA from environmental insults or errors during metabolism.	BP	4.96836e-06	135	865	170688	1602382	0.00108696	25946	ZNF385A
bp.846	GO:0006974	cellular response to DNA damage stimulus	Any process that results in a change in state or activity of a cell (in terms of movement, secretion, enzyme production, gene expression, etc.) as a result of a stimulus indicating damage to its DNA from environmental insults or errors during metabolism.	BP	4.96836e-06	135	865	170688	1602382	0.00108696	11201	POLI
bp.847	GO:0006974	cellular response to DNA damage stimulus	Any process that results in a change in state or activity of a cell (in terms of movement, secretion, enzyme production, gene expression, etc.) as a result of a stimulus indicating damage to its DNA from environmental insults or errors during metabolism.	BP	4.96836e-06	135	865	170688	1602382	0.00108696	144455	E2F7
bp.848	GO:0006974	cellular response to DNA damage stimulus	Any process that results in a change in state or activity of a cell (in terms of movement, secretion, enzyme production, gene expression, etc.) as a result of a stimulus indicating damage to its DNA from environmental insults or errors during metabolism.	BP	4.96836e-06	135	865	170688	1602382	0.00108696	79624	ARMT1
bp.849	GO:0006974	cellular response to DNA damage stimulus	Any process that results in a change in state or activity of a cell (in terms of movement, secretion, enzyme production, gene expression, etc.) as a result of a stimulus indicating damage to its DNA from environmental insults or errors during metabolism.	BP	4.96836e-06	135	865	170688	1602382	0.00108696	100133315	NA
bp.850	GO:0006974	cellular response to DNA damage stimulus	Any process that results in a change in state or activity of a cell (in terms of movement, secretion, enzyme production, gene expression, etc.) as a result of a stimulus indicating damage to its DNA from environmental insults or errors during metabolism.	BP	4.96836e-06	135	865	170688	1602382	0.00108696	65975	STK33
bp.851	GO:0006974	cellular response to DNA damage stimulus	Any process that results in a change in state or activity of a cell (in terms of movement, secretion, enzyme production, gene expression, etc.) as a result of a stimulus indicating damage to its DNA from environmental insults or errors during metabolism.	BP	4.96836e-06	135	865	170688	1602382	0.00108696	259282	BOD1L1
bp.852	GO:0006974	cellular response to DNA damage stimulus	Any process that results in a change in state or activity of a cell (in terms of movement, secretion, enzyme production, gene expression, etc.) as a result of a stimulus indicating damage to its DNA from environmental insults or errors during metabolism.	BP	4.96836e-06	135	865	170688	1602382	0.00108696	8359	HIST1H4A
bp.853	GO:0006974	cellular response to DNA damage stimulus	Any process that results in a change in state or activity of a cell (in terms of movement, secretion, enzyme production, gene expression, etc.) as a result of a stimulus indicating damage to its DNA from environmental insults or errors during metabolism.	BP	4.96836e-06	135	865	170688	1602382	0.00108696	64859	NABP1
bp.854	GO:0006974	cellular response to DNA damage stimulus	Any process that results in a change in state or activity of a cell (in terms of movement, secretion, enzyme production, gene expression, etc.) as a result of a stimulus indicating damage to its DNA from environmental insults or errors during metabolism.	BP	4.96836e-06	135	865	170688	1602382	0.00108696	348654	GEN1
bp.855	GO:0006974	cellular response to DNA damage stimulus	Any process that results in a change in state or activity of a cell (in terms of movement, secretion, enzyme production, gene expression, etc.) as a result of a stimulus indicating damage to its DNA from environmental insults or errors during metabolism.	BP	4.96836e-06	135	865	170688	1602382	0.00108696	7518	XRCC4
bp.856	GO:0006974	cellular response to DNA damage stimulus	Any process that results in a change in state or activity of a cell (in terms of movement, secretion, enzyme production, gene expression, etc.) as a result of a stimulus indicating damage to its DNA from environmental insults or errors during metabolism.	BP	4.96836e-06	135	865	170688	1602382	0.00108696	23468	CBX5
bp.857	GO:0006974	cellular response to DNA damage stimulus	Any process that results in a change in state or activity of a cell (in terms of movement, secretion, enzyme production, gene expression, etc.) as a result of a stimulus indicating damage to its DNA from environmental insults or errors during metabolism.	BP	4.96836e-06	135	865	170688	1602382	0.00108696	10413	YAP1
bp.858	GO:0006974	cellular response to DNA damage stimulus	Any process that results in a change in state or activity of a cell (in terms of movement, secretion, enzyme production, gene expression, etc.) as a result of a stimulus indicating damage to its DNA from environmental insults or errors during metabolism.	BP	4.96836e-06	135	865	170688	1602382	0.00108696	8870	IER3
bp.859	GO:0006974	cellular response to DNA damage stimulus	Any process that results in a change in state or activity of a cell (in terms of movement, secretion, enzyme production, gene expression, etc.) as a result of a stimulus indicating damage to its DNA from environmental insults or errors during metabolism.	BP	4.96836e-06	135	865	170688	1602382	0.00108696	113510	HELQ
bp.860	GO:0006974	cellular response to DNA damage stimulus	Any process that results in a change in state or activity of a cell (in terms of movement, secretion, enzyme production, gene expression, etc.) as a result of a stimulus indicating damage to its DNA from environmental insults or errors during metabolism.	BP	4.96836e-06	135	865	170688	1602382	0.00108696	545	ATR
bp.861	GO:0006974	cellular response to DNA damage stimulus	Any process that results in a change in state or activity of a cell (in terms of movement, secretion, enzyme production, gene expression, etc.) as a result of a stimulus indicating damage to its DNA from environmental insults or errors during metabolism.	BP	4.96836e-06	135	865	170688	1602382	0.00108696	29965	CDIP1
bp.862	GO:0006974	cellular response to DNA damage stimulus	Any process that results in a change in state or activity of a cell (in terms of movement, secretion, enzyme production, gene expression, etc.) as a result of a stimulus indicating damage to its DNA from environmental insults or errors during metabolism.	BP	4.96836e-06	135	865	170688	1602382	0.00108696	6154	RPL26
bp.863	GO:0006974	cellular response to DNA damage stimulus	Any process that results in a change in state or activity of a cell (in terms of movement, secretion, enzyme production, gene expression, etc.) as a result of a stimulus indicating damage to its DNA from environmental insults or errors during metabolism.	BP	4.96836e-06	135	865	170688	1602382	0.00108696	581	BAX
bp.864	GO:0006974	cellular response to DNA damage stimulus	Any process that results in a change in state or activity of a cell (in terms of movement, secretion, enzyme production, gene expression, etc.) as a result of a stimulus indicating damage to its DNA from environmental insults or errors during metabolism.	BP	4.96836e-06	135	865	170688	1602382	0.00108696	3146	HMGB1
bp.865	GO:0006974	cellular response to DNA damage stimulus	Any process that results in a change in state or activity of a cell (in terms of movement, secretion, enzyme production, gene expression, etc.) as a result of a stimulus indicating damage to its DNA from environmental insults or errors during metabolism.	BP	4.96836e-06	135	865	170688	1602382	0.00108696	5366	PMAIP1
bp.866	GO:0006974	cellular response to DNA damage stimulus	Any process that results in a change in state or activity of a cell (in terms of movement, secretion, enzyme production, gene expression, etc.) as a result of a stimulus indicating damage to its DNA from environmental insults or errors during metabolism.	BP	4.96836e-06	135	865	170688	1602382	0.00108696	4646	MYO6
bp.867	GO:0006974	cellular response to DNA damage stimulus	Any process that results in a change in state or activity of a cell (in terms of movement, secretion, enzyme production, gene expression, etc.) as a result of a stimulus indicating damage to its DNA from environmental insults or errors during metabolism.	BP	4.96836e-06	135	865	170688	1602382	0.00108696	80010	RMI1
bp.868	GO:0006974	cellular response to DNA damage stimulus	Any process that results in a change in state or activity of a cell (in terms of movement, secretion, enzyme production, gene expression, etc.) as a result of a stimulus indicating damage to its DNA from environmental insults or errors during metabolism.	BP	4.96836e-06	135	865	170688	1602382	0.00108696	22909	FAN1
bp.869	GO:0006974	cellular response to DNA damage stimulus	Any process that results in a change in state or activity of a cell (in terms of movement, secretion, enzyme production, gene expression, etc.) as a result of a stimulus indicating damage to its DNA from environmental insults or errors during metabolism.	BP	4.96836e-06	135	865	170688	1602382	0.00108696	2968	GTF2H4
bp.870	GO:0006974	cellular response to DNA damage stimulus	Any process that results in a change in state or activity of a cell (in terms of movement, secretion, enzyme production, gene expression, etc.) as a result of a stimulus indicating damage to its DNA from environmental insults or errors during metabolism.	BP	4.96836e-06	135	865	170688	1602382	0.00108696	7311	UBA52
bp.871	GO:0006974	cellular response to DNA damage stimulus	Any process that results in a change in state or activity of a cell (in terms of movement, secretion, enzyme production, gene expression, etc.) as a result of a stimulus indicating damage to its DNA from environmental insults or errors during metabolism.	BP	4.96836e-06	135	865	170688	1602382	0.00108696	23019	CNOT1
bp.872	GO:0006974	cellular response to DNA damage stimulus	Any process that results in a change in state or activity of a cell (in terms of movement, secretion, enzyme production, gene expression, etc.) as a result of a stimulus indicating damage to its DNA from environmental insults or errors during metabolism.	BP	4.96836e-06	135	865	170688	1602382	0.00108696	4350	MPG
bp.873	GO:0006974	cellular response to DNA damage stimulus	Any process that results in a change in state or activity of a cell (in terms of movement, secretion, enzyme production, gene expression, etc.) as a result of a stimulus indicating damage to its DNA from environmental insults or errors during metabolism.	BP	4.96836e-06	135	865	170688	1602382	0.00108696	91603	ZNF830
bp.874	GO:0006974	cellular response to DNA damage stimulus	Any process that results in a change in state or activity of a cell (in terms of movement, secretion, enzyme production, gene expression, etc.) as a result of a stimulus indicating damage to its DNA from environmental insults or errors during metabolism.	BP	4.96836e-06	135	865	170688	1602382	0.00108696	7029	TFDP2
bp.875	GO:0006974	cellular response to DNA damage stimulus	Any process that results in a change in state or activity of a cell (in terms of movement, secretion, enzyme production, gene expression, etc.) as a result of a stimulus indicating damage to its DNA from environmental insults or errors during metabolism.	BP	4.96836e-06	135	865	170688	1602382	0.00108696	56941	HMCES
bp.876	GO:0006974	cellular response to DNA damage stimulus	Any process that results in a change in state or activity of a cell (in terms of movement, secretion, enzyme production, gene expression, etc.) as a result of a stimulus indicating damage to its DNA from environmental insults or errors during metabolism.	BP	4.96836e-06	135	865	170688	1602382	0.00108696	8313	AXIN2
bp.877	GO:0006974	cellular response to DNA damage stimulus	Any process that results in a change in state or activity of a cell (in terms of movement, secretion, enzyme production, gene expression, etc.) as a result of a stimulus indicating damage to its DNA from environmental insults or errors during metabolism.	BP	4.96836e-06	135	865	170688	1602382	0.00108696	3190	HNRNPK
bp.878	GO:0006974	cellular response to DNA damage stimulus	Any process that results in a change in state or activity of a cell (in terms of movement, secretion, enzyme production, gene expression, etc.) as a result of a stimulus indicating damage to its DNA from environmental insults or errors during metabolism.	BP	4.96836e-06	135	865	170688	1602382	0.00108696	57472	CNOT6
bp.879	GO:0006974	cellular response to DNA damage stimulus	Any process that results in a change in state or activity of a cell (in terms of movement, secretion, enzyme production, gene expression, etc.) as a result of a stimulus indicating damage to its DNA from environmental insults or errors during metabolism.	BP	4.96836e-06	135	865	170688	1602382	0.00108696	317761	C14orf39
bp.880	GO:0006974	cellular response to DNA damage stimulus	Any process that results in a change in state or activity of a cell (in terms of movement, secretion, enzyme production, gene expression, etc.) as a result of a stimulus indicating damage to its DNA from environmental insults or errors during metabolism.	BP	4.96836e-06	135	865	170688	1602382	0.00108696	9344	TAOK2
bp.881	GO:0006974	cellular response to DNA damage stimulus	Any process that results in a change in state or activity of a cell (in terms of movement, secretion, enzyme production, gene expression, etc.) as a result of a stimulus indicating damage to its DNA from environmental insults or errors during metabolism.	BP	4.96836e-06	135	865	170688	1602382	0.00108696	5428	POLG
bp.882	GO:0006974	cellular response to DNA damage stimulus	Any process that results in a change in state or activity of a cell (in terms of movement, secretion, enzyme production, gene expression, etc.) as a result of a stimulus indicating damage to its DNA from environmental insults or errors during metabolism.	BP	4.96836e-06	135	865	170688	1602382	0.00108696	146956	EME1
bp.883	GO:0006974	cellular response to DNA damage stimulus	Any process that results in a change in state or activity of a cell (in terms of movement, secretion, enzyme production, gene expression, etc.) as a result of a stimulus indicating damage to its DNA from environmental insults or errors during metabolism.	BP	4.96836e-06	135	865	170688	1602382	0.00108696	51366	UBR5
bp.884	GO:0006974	cellular response to DNA damage stimulus	Any process that results in a change in state or activity of a cell (in terms of movement, secretion, enzyme production, gene expression, etc.) as a result of a stimulus indicating damage to its DNA from environmental insults or errors during metabolism.	BP	4.96836e-06	135	865	170688	1602382	0.00108696	842	CASP9
bp.885	GO:0006974	cellular response to DNA damage stimulus	Any process that results in a change in state or activity of a cell (in terms of movement, secretion, enzyme production, gene expression, etc.) as a result of a stimulus indicating damage to its DNA from environmental insults or errors during metabolism.	BP	4.96836e-06	135	865	170688	1602382	0.00108696	3364	HUS1
bp.886	GO:0006974	cellular response to DNA damage stimulus	Any process that results in a change in state or activity of a cell (in terms of movement, secretion, enzyme production, gene expression, etc.) as a result of a stimulus indicating damage to its DNA from environmental insults or errors during metabolism.	BP	4.96836e-06	135	865	170688	1602382	0.00108696	54541	DDIT4
bp.887	GO:0006974	cellular response to DNA damage stimulus	Any process that results in a change in state or activity of a cell (in terms of movement, secretion, enzyme production, gene expression, etc.) as a result of a stimulus indicating damage to its DNA from environmental insults or errors during metabolism.	BP	4.96836e-06	135	865	170688	1602382	0.00108696	57060	PCBP4
bp.888	GO:0006974	cellular response to DNA damage stimulus	Any process that results in a change in state or activity of a cell (in terms of movement, secretion, enzyme production, gene expression, etc.) as a result of a stimulus indicating damage to its DNA from environmental insults or errors during metabolism.	BP	4.96836e-06	135	865	170688	1602382	0.00108696	22880	MORC2
bp.889	GO:0006974	cellular response to DNA damage stimulus	Any process that results in a change in state or activity of a cell (in terms of movement, secretion, enzyme production, gene expression, etc.) as a result of a stimulus indicating damage to its DNA from environmental insults or errors during metabolism.	BP	4.96836e-06	135	865	170688	1602382	0.00108696	7320	UBE2B
bp.890	GO:0006974	cellular response to DNA damage stimulus	Any process that results in a change in state or activity of a cell (in terms of movement, secretion, enzyme production, gene expression, etc.) as a result of a stimulus indicating damage to its DNA from environmental insults or errors during metabolism.	BP	4.96836e-06	135	865	170688	1602382	0.00108696	24144	TFIP11
bp.891	GO:0006974	cellular response to DNA damage stimulus	Any process that results in a change in state or activity of a cell (in terms of movement, secretion, enzyme production, gene expression, etc.) as a result of a stimulus indicating damage to its DNA from environmental insults or errors during metabolism.	BP	4.96836e-06	135	865	170688	1602382	0.00108696	54386	NA
bp.892	GO:0006974	cellular response to DNA damage stimulus	Any process that results in a change in state or activity of a cell (in terms of movement, secretion, enzyme production, gene expression, etc.) as a result of a stimulus indicating damage to its DNA from environmental insults or errors during metabolism.	BP	4.96836e-06	135	865	170688	1602382	0.00108696	57109	REXO4
bp.893	GO:0006974	cellular response to DNA damage stimulus	Any process that results in a change in state or activity of a cell (in terms of movement, secretion, enzyme production, gene expression, etc.) as a result of a stimulus indicating damage to its DNA from environmental insults or errors during metabolism.	BP	4.96836e-06	135	865	170688	1602382	0.00108696	10039	PARP3
bp.894	GO:0006974	cellular response to DNA damage stimulus	Any process that results in a change in state or activity of a cell (in terms of movement, secretion, enzyme production, gene expression, etc.) as a result of a stimulus indicating damage to its DNA from environmental insults or errors during metabolism.	BP	4.96836e-06	135	865	170688	1602382	0.00108696	578	BAK1
bp.895	GO:0006974	cellular response to DNA damage stimulus	Any process that results in a change in state or activity of a cell (in terms of movement, secretion, enzyme production, gene expression, etc.) as a result of a stimulus indicating damage to its DNA from environmental insults or errors during metabolism.	BP	4.96836e-06	135	865	170688	1602382	0.00108696	55284	UBE2W
bp.896	GO:0006974	cellular response to DNA damage stimulus	Any process that results in a change in state or activity of a cell (in terms of movement, secretion, enzyme production, gene expression, etc.) as a result of a stimulus indicating damage to its DNA from environmental insults or errors during metabolism.	BP	4.96836e-06	135	865	170688	1602382	0.00108696	79791	FBXO31
bp.897	GO:0006974	cellular response to DNA damage stimulus	Any process that results in a change in state or activity of a cell (in terms of movement, secretion, enzyme production, gene expression, etc.) as a result of a stimulus indicating damage to its DNA from environmental insults or errors during metabolism.	BP	4.96836e-06	135	865	170688	1602382	0.00108696	6300	MAPK12
bp.898	GO:0006974	cellular response to DNA damage stimulus	Any process that results in a change in state or activity of a cell (in terms of movement, secretion, enzyme production, gene expression, etc.) as a result of a stimulus indicating damage to its DNA from environmental insults or errors during metabolism.	BP	4.96836e-06	135	865	170688	1602382	0.00108696	11143	KAT7
bp.899	GO:0006974	cellular response to DNA damage stimulus	Any process that results in a change in state or activity of a cell (in terms of movement, secretion, enzyme production, gene expression, etc.) as a result of a stimulus indicating damage to its DNA from environmental insults or errors during metabolism.	BP	4.96836e-06	135	865	170688	1602382	0.00108696	6790	AURKA
bp.900	GO:0006974	cellular response to DNA damage stimulus	Any process that results in a change in state or activity of a cell (in terms of movement, secretion, enzyme production, gene expression, etc.) as a result of a stimulus indicating damage to its DNA from environmental insults or errors during metabolism.	BP	4.96836e-06	135	865	170688	1602382	0.00108696	29997	GLTSCR2
bp.901	GO:0006974	cellular response to DNA damage stimulus	Any process that results in a change in state or activity of a cell (in terms of movement, secretion, enzyme production, gene expression, etc.) as a result of a stimulus indicating damage to its DNA from environmental insults or errors during metabolism.	BP	4.96836e-06	135	865	170688	1602382	0.00108696	8091	HMGA2
bp.902	GO:0006974	cellular response to DNA damage stimulus	Any process that results in a change in state or activity of a cell (in terms of movement, secretion, enzyme production, gene expression, etc.) as a result of a stimulus indicating damage to its DNA from environmental insults or errors during metabolism.	BP	4.96836e-06	135	865	170688	1602382	0.00108696	7353	UFD1L
bp.903	GO:0006974	cellular response to DNA damage stimulus	Any process that results in a change in state or activity of a cell (in terms of movement, secretion, enzyme production, gene expression, etc.) as a result of a stimulus indicating damage to its DNA from environmental insults or errors during metabolism.	BP	4.96836e-06	135	865	170688	1602382	0.00108696	57461	ISY1
bp.904	GO:0006974	cellular response to DNA damage stimulus	Any process that results in a change in state or activity of a cell (in terms of movement, secretion, enzyme production, gene expression, etc.) as a result of a stimulus indicating damage to its DNA from environmental insults or errors during metabolism.	BP	4.96836e-06	135	865	170688	1602382	0.00108696	5982	RFC2
bp.905	GO:0006974	cellular response to DNA damage stimulus	Any process that results in a change in state or activity of a cell (in terms of movement, secretion, enzyme production, gene expression, etc.) as a result of a stimulus indicating damage to its DNA from environmental insults or errors during metabolism.	BP	4.96836e-06	135	865	170688	1602382	0.00108696	5981	RFC1
bp.906	GO:0006974	cellular response to DNA damage stimulus	Any process that results in a change in state or activity of a cell (in terms of movement, secretion, enzyme production, gene expression, etc.) as a result of a stimulus indicating damage to its DNA from environmental insults or errors during metabolism.	BP	4.96836e-06	135	865	170688	1602382	0.00108696	51343	FZR1
bp.907	GO:0006974	cellular response to DNA damage stimulus	Any process that results in a change in state or activity of a cell (in terms of movement, secretion, enzyme production, gene expression, etc.) as a result of a stimulus indicating damage to its DNA from environmental insults or errors during metabolism.	BP	4.96836e-06	135	865	170688	1602382	0.00108696	2255	FGF10
bp.908	GO:0006974	cellular response to DNA damage stimulus	Any process that results in a change in state or activity of a cell (in terms of movement, secretion, enzyme production, gene expression, etc.) as a result of a stimulus indicating damage to its DNA from environmental insults or errors during metabolism.	BP	4.96836e-06	135	865	170688	1602382	0.00108696	57659	ZBTB4
bp.909	GO:0006974	cellular response to DNA damage stimulus	Any process that results in a change in state or activity of a cell (in terms of movement, secretion, enzyme production, gene expression, etc.) as a result of a stimulus indicating damage to its DNA from environmental insults or errors during metabolism.	BP	4.96836e-06	135	865	170688	1602382	0.00108696	3159	HMGA1
bp.910	GO:0006974	cellular response to DNA damage stimulus	Any process that results in a change in state or activity of a cell (in terms of movement, secretion, enzyme production, gene expression, etc.) as a result of a stimulus indicating damage to its DNA from environmental insults or errors during metabolism.	BP	4.96836e-06	135	865	170688	1602382	0.00108696	55702	CCDC94
bp.911	GO:0006974	cellular response to DNA damage stimulus	Any process that results in a change in state or activity of a cell (in terms of movement, secretion, enzyme production, gene expression, etc.) as a result of a stimulus indicating damage to its DNA from environmental insults or errors during metabolism.	BP	4.96836e-06	135	865	170688	1602382	0.00108696	54107	POLE3
bp.912	GO:0006974	cellular response to DNA damage stimulus	Any process that results in a change in state or activity of a cell (in terms of movement, secretion, enzyme production, gene expression, etc.) as a result of a stimulus indicating damage to its DNA from environmental insults or errors during metabolism.	BP	4.96836e-06	135	865	170688	1602382	0.00108696	5430	POLR2A
bp.913	GO:0006974	cellular response to DNA damage stimulus	Any process that results in a change in state or activity of a cell (in terms of movement, secretion, enzyme production, gene expression, etc.) as a result of a stimulus indicating damage to its DNA from environmental insults or errors during metabolism.	BP	4.96836e-06	135	865	170688	1602382	0.00108696	10269	ZMPSTE24
bp.914	GO:0006974	cellular response to DNA damage stimulus	Any process that results in a change in state or activity of a cell (in terms of movement, secretion, enzyme production, gene expression, etc.) as a result of a stimulus indicating damage to its DNA from environmental insults or errors during metabolism.	BP	4.96836e-06	135	865	170688	1602382	0.00108696	6591	SNAI2
bp.915	GO:0006974	cellular response to DNA damage stimulus	Any process that results in a change in state or activity of a cell (in terms of movement, secretion, enzyme production, gene expression, etc.) as a result of a stimulus indicating damage to its DNA from environmental insults or errors during metabolism.	BP	4.96836e-06	135	865	170688	1602382	0.00108696	56339	METTL3
bp.916	GO:0007049	cell cycle	The progression of biochemical and morphological phases and events that occur in a cell during successive cell replication or nuclear replication events. Canonically, the cell cycle comprises the replication and segregation of genetic material followed by the division of the cell, but in endocycles or syncytial cells nuclear replication or nuclear division may not be followed by cell division.	BP	5.63547e-06	262	1882	170688	1602382	0.00116982	57092	PCNP
bp.917	GO:0007049	cell cycle	The progression of biochemical and morphological phases and events that occur in a cell during successive cell replication or nuclear replication events. Canonically, the cell cycle comprises the replication and segregation of genetic material followed by the division of the cell, but in endocycles or syncytial cells nuclear replication or nuclear division may not be followed by cell division.	BP	5.63547e-06	262	1882	170688	1602382	0.00116982	984	CDK11B
bp.918	GO:0007049	cell cycle	The progression of biochemical and morphological phases and events that occur in a cell during successive cell replication or nuclear replication events. Canonically, the cell cycle comprises the replication and segregation of genetic material followed by the division of the cell, but in endocycles or syncytial cells nuclear replication or nuclear division may not be followed by cell division.	BP	5.63547e-06	262	1882	170688	1602382	0.00116982	51112	TRAPPC12
bp.919	GO:0007049	cell cycle	The progression of biochemical and morphological phases and events that occur in a cell during successive cell replication or nuclear replication events. Canonically, the cell cycle comprises the replication and segregation of genetic material followed by the division of the cell, but in endocycles or syncytial cells nuclear replication or nuclear division may not be followed by cell division.	BP	5.63547e-06	262	1882	170688	1602382	0.00116982	9735	KNTC1
bp.920	GO:0007049	cell cycle	The progression of biochemical and morphological phases and events that occur in a cell during successive cell replication or nuclear replication events. Canonically, the cell cycle comprises the replication and segregation of genetic material followed by the division of the cell, but in endocycles or syncytial cells nuclear replication or nuclear division may not be followed by cell division.	BP	5.63547e-06	262	1882	170688	1602382	0.00116982	9126	SMC3
bp.921	GO:0007049	cell cycle	The progression of biochemical and morphological phases and events that occur in a cell during successive cell replication or nuclear replication events. Canonically, the cell cycle comprises the replication and segregation of genetic material followed by the division of the cell, but in endocycles or syncytial cells nuclear replication or nuclear division may not be followed by cell division.	BP	5.63547e-06	262	1882	170688	1602382	0.00116982	91272	BOD1
bp.922	GO:0007049	cell cycle	The progression of biochemical and morphological phases and events that occur in a cell during successive cell replication or nuclear replication events. Canonically, the cell cycle comprises the replication and segregation of genetic material followed by the division of the cell, but in endocycles or syncytial cells nuclear replication or nuclear division may not be followed by cell division.	BP	5.63547e-06	262	1882	170688	1602382	0.00116982	140609	NEK7
bp.923	GO:0007049	cell cycle	The progression of biochemical and morphological phases and events that occur in a cell during successive cell replication or nuclear replication events. Canonically, the cell cycle comprises the replication and segregation of genetic material followed by the division of the cell, but in endocycles or syncytial cells nuclear replication or nuclear division may not be followed by cell division.	BP	5.63547e-06	262	1882	170688	1602382	0.00116982	7156	TOP3A
bp.924	GO:0007049	cell cycle	The progression of biochemical and morphological phases and events that occur in a cell during successive cell replication or nuclear replication events. Canonically, the cell cycle comprises the replication and segregation of genetic material followed by the division of the cell, but in endocycles or syncytial cells nuclear replication or nuclear division may not be followed by cell division.	BP	5.63547e-06	262	1882	170688	1602382	0.00116982	91603	ZNF830
bp.925	GO:0007049	cell cycle	The progression of biochemical and morphological phases and events that occur in a cell during successive cell replication or nuclear replication events. Canonically, the cell cycle comprises the replication and segregation of genetic material followed by the division of the cell, but in endocycles or syncytial cells nuclear replication or nuclear division may not be followed by cell division.	BP	5.63547e-06	262	1882	170688	1602382	0.00116982	57519	STARD9
bp.926	GO:0007049	cell cycle	The progression of biochemical and morphological phases and events that occur in a cell during successive cell replication or nuclear replication events. Canonically, the cell cycle comprises the replication and segregation of genetic material followed by the division of the cell, but in endocycles or syncytial cells nuclear replication or nuclear division may not be followed by cell division.	BP	5.63547e-06	262	1882	170688	1602382	0.00116982	55749	CCAR1
bp.927	GO:0007049	cell cycle	The progression of biochemical and morphological phases and events that occur in a cell during successive cell replication or nuclear replication events. Canonically, the cell cycle comprises the replication and segregation of genetic material followed by the division of the cell, but in endocycles or syncytial cells nuclear replication or nuclear division may not be followed by cell division.	BP	5.63547e-06	262	1882	170688	1602382	0.00116982	85378	TUBGCP6
bp.928	GO:0007049	cell cycle	The progression of biochemical and morphological phases and events that occur in a cell during successive cell replication or nuclear replication events. Canonically, the cell cycle comprises the replication and segregation of genetic material followed by the division of the cell, but in endocycles or syncytial cells nuclear replication or nuclear division may not be followed by cell division.	BP	5.63547e-06	262	1882	170688	1602382	0.00116982	23063	WAPL
bp.929	GO:0007049	cell cycle	The progression of biochemical and morphological phases and events that occur in a cell during successive cell replication or nuclear replication events. Canonically, the cell cycle comprises the replication and segregation of genetic material followed by the division of the cell, but in endocycles or syncytial cells nuclear replication or nuclear division may not be followed by cell division.	BP	5.63547e-06	262	1882	170688	1602382	0.00116982	545	ATR
bp.930	GO:0007049	cell cycle	The progression of biochemical and morphological phases and events that occur in a cell during successive cell replication or nuclear replication events. Canonically, the cell cycle comprises the replication and segregation of genetic material followed by the division of the cell, but in endocycles or syncytial cells nuclear replication or nuclear division may not be followed by cell division.	BP	5.63547e-06	262	1882	170688	1602382	0.00116982	60370	AVPI1
bp.931	GO:0007049	cell cycle	The progression of biochemical and morphological phases and events that occur in a cell during successive cell replication or nuclear replication events. Canonically, the cell cycle comprises the replication and segregation of genetic material followed by the division of the cell, but in endocycles or syncytial cells nuclear replication or nuclear division may not be followed by cell division.	BP	5.63547e-06	262	1882	170688	1602382	0.00116982	1457	CSNK2A1
bp.932	GO:0007049	cell cycle	The progression of biochemical and morphological phases and events that occur in a cell during successive cell replication or nuclear replication events. Canonically, the cell cycle comprises the replication and segregation of genetic material followed by the division of the cell, but in endocycles or syncytial cells nuclear replication or nuclear division may not be followed by cell division.	BP	5.63547e-06	262	1882	170688	1602382	0.00116982	3364	HUS1
bp.933	GO:0007049	cell cycle	The progression of biochemical and morphological phases and events that occur in a cell during successive cell replication or nuclear replication events. Canonically, the cell cycle comprises the replication and segregation of genetic material followed by the division of the cell, but in endocycles or syncytial cells nuclear replication or nuclear division may not be followed by cell division.	BP	5.63547e-06	262	1882	170688	1602382	0.00116982	1163	CKS1B
bp.934	GO:0007049	cell cycle	The progression of biochemical and morphological phases and events that occur in a cell during successive cell replication or nuclear replication events. Canonically, the cell cycle comprises the replication and segregation of genetic material followed by the division of the cell, but in endocycles or syncytial cells nuclear replication or nuclear division may not be followed by cell division.	BP	5.63547e-06	262	1882	170688	1602382	0.00116982	55752	SEPT11
bp.935	GO:0007049	cell cycle	The progression of biochemical and morphological phases and events that occur in a cell during successive cell replication or nuclear replication events. Canonically, the cell cycle comprises the replication and segregation of genetic material followed by the division of the cell, but in endocycles or syncytial cells nuclear replication or nuclear division may not be followed by cell division.	BP	5.63547e-06	262	1882	170688	1602382	0.00116982	26993	AKAP8L
bp.936	GO:0007049	cell cycle	The progression of biochemical and morphological phases and events that occur in a cell during successive cell replication or nuclear replication events. Canonically, the cell cycle comprises the replication and segregation of genetic material followed by the division of the cell, but in endocycles or syncytial cells nuclear replication or nuclear division may not be followed by cell division.	BP	5.63547e-06	262	1882	170688	1602382	0.00116982	55004	LAMTOR1
bp.937	GO:0007049	cell cycle	The progression of biochemical and morphological phases and events that occur in a cell during successive cell replication or nuclear replication events. Canonically, the cell cycle comprises the replication and segregation of genetic material followed by the division of the cell, but in endocycles or syncytial cells nuclear replication or nuclear division may not be followed by cell division.	BP	5.63547e-06	262	1882	170688	1602382	0.00116982	221035	REEP3
bp.938	GO:0007049	cell cycle	The progression of biochemical and morphological phases and events that occur in a cell during successive cell replication or nuclear replication events. Canonically, the cell cycle comprises the replication and segregation of genetic material followed by the division of the cell, but in endocycles or syncytial cells nuclear replication or nuclear division may not be followed by cell division.	BP	5.63547e-06	262	1882	170688	1602382	0.00116982	54984	PINX1
bp.939	GO:0007049	cell cycle	The progression of biochemical and morphological phases and events that occur in a cell during successive cell replication or nuclear replication events. Canonically, the cell cycle comprises the replication and segregation of genetic material followed by the division of the cell, but in endocycles or syncytial cells nuclear replication or nuclear division may not be followed by cell division.	BP	5.63547e-06	262	1882	170688	1602382	0.00116982	10668	CGRRF1
bp.940	GO:0007049	cell cycle	The progression of biochemical and morphological phases and events that occur in a cell during successive cell replication or nuclear replication events. Canonically, the cell cycle comprises the replication and segregation of genetic material followed by the division of the cell, but in endocycles or syncytial cells nuclear replication or nuclear division may not be followed by cell division.	BP	5.63547e-06	262	1882	170688	1602382	0.00116982	83903	GSG2
bp.941	GO:0007049	cell cycle	The progression of biochemical and morphological phases and events that occur in a cell during successive cell replication or nuclear replication events. Canonically, the cell cycle comprises the replication and segregation of genetic material followed by the division of the cell, but in endocycles or syncytial cells nuclear replication or nuclear division may not be followed by cell division.	BP	5.63547e-06	262	1882	170688	1602382	0.00116982	83852	SETDB2
bp.942	GO:0007049	cell cycle	The progression of biochemical and morphological phases and events that occur in a cell during successive cell replication or nuclear replication events. Canonically, the cell cycle comprises the replication and segregation of genetic material followed by the division of the cell, but in endocycles or syncytial cells nuclear replication or nuclear division may not be followed by cell division.	BP	5.63547e-06	262	1882	170688	1602382	0.00116982	51147	ING4
bp.943	GO:0007049	cell cycle	The progression of biochemical and morphological phases and events that occur in a cell during successive cell replication or nuclear replication events. Canonically, the cell cycle comprises the replication and segregation of genetic material followed by the division of the cell, but in endocycles or syncytial cells nuclear replication or nuclear division may not be followed by cell division.	BP	5.63547e-06	262	1882	170688	1602382	0.00116982	2290	FOXG1
bp.944	GO:0007049	cell cycle	The progression of biochemical and morphological phases and events that occur in a cell during successive cell replication or nuclear replication events. Canonically, the cell cycle comprises the replication and segregation of genetic material followed by the division of the cell, but in endocycles or syncytial cells nuclear replication or nuclear division may not be followed by cell division.	BP	5.63547e-06	262	1882	170688	1602382	0.00116982	8738	CRADD
bp.945	GO:0007049	cell cycle	The progression of biochemical and morphological phases and events that occur in a cell during successive cell replication or nuclear replication events. Canonically, the cell cycle comprises the replication and segregation of genetic material followed by the division of the cell, but in endocycles or syncytial cells nuclear replication or nuclear division may not be followed by cell division.	BP	5.63547e-06	262	1882	170688	1602382	0.00116982	835	CASP2
bp.946	GO:0007049	cell cycle	The progression of biochemical and morphological phases and events that occur in a cell during successive cell replication or nuclear replication events. Canonically, the cell cycle comprises the replication and segregation of genetic material followed by the division of the cell, but in endocycles or syncytial cells nuclear replication or nuclear division may not be followed by cell division.	BP	5.63547e-06	262	1882	170688	1602382	0.00116982	1031	CDKN2C
bp.947	GO:0007049	cell cycle	The progression of biochemical and morphological phases and events that occur in a cell during successive cell replication or nuclear replication events. Canonically, the cell cycle comprises the replication and segregation of genetic material followed by the division of the cell, but in endocycles or syncytial cells nuclear replication or nuclear division may not be followed by cell division.	BP	5.63547e-06	262	1882	170688	1602382	0.00116982	7157	TP53
bp.948	GO:0007049	cell cycle	The progression of biochemical and morphological phases and events that occur in a cell during successive cell replication or nuclear replication events. Canonically, the cell cycle comprises the replication and segregation of genetic material followed by the division of the cell, but in endocycles or syncytial cells nuclear replication or nuclear division may not be followed by cell division.	BP	5.63547e-06	262	1882	170688	1602382	0.00116982	8313	AXIN2
bp.949	GO:0007049	cell cycle	The progression of biochemical and morphological phases and events that occur in a cell during successive cell replication or nuclear replication events. Canonically, the cell cycle comprises the replication and segregation of genetic material followed by the division of the cell, but in endocycles or syncytial cells nuclear replication or nuclear division may not be followed by cell division.	BP	5.63547e-06	262	1882	170688	1602382	0.00116982	51441	YTHDF2
bp.950	GO:0007049	cell cycle	The progression of biochemical and morphological phases and events that occur in a cell during successive cell replication or nuclear replication events. Canonically, the cell cycle comprises the replication and segregation of genetic material followed by the division of the cell, but in endocycles or syncytial cells nuclear replication or nuclear division may not be followed by cell division.	BP	5.63547e-06	262	1882	170688	1602382	0.00116982	10300	KATNB1
bp.951	GO:0007049	cell cycle	The progression of biochemical and morphological phases and events that occur in a cell during successive cell replication or nuclear replication events. Canonically, the cell cycle comprises the replication and segregation of genetic material followed by the division of the cell, but in endocycles or syncytial cells nuclear replication or nuclear division may not be followed by cell division.	BP	5.63547e-06	262	1882	170688	1602382	0.00116982	9639	ARHGEF10
bp.952	GO:0007049	cell cycle	The progression of biochemical and morphological phases and events that occur in a cell during successive cell replication or nuclear replication events. Canonically, the cell cycle comprises the replication and segregation of genetic material followed by the division of the cell, but in endocycles or syncytial cells nuclear replication or nuclear division may not be followed by cell division.	BP	5.63547e-06	262	1882	170688	1602382	0.00116982	3837	KPNB1
bp.953	GO:0007049	cell cycle	The progression of biochemical and morphological phases and events that occur in a cell during successive cell replication or nuclear replication events. Canonically, the cell cycle comprises the replication and segregation of genetic material followed by the division of the cell, but in endocycles or syncytial cells nuclear replication or nuclear division may not be followed by cell division.	BP	5.63547e-06	262	1882	170688	1602382	0.00116982	23015	GOLGA8A
bp.954	GO:0007049	cell cycle	The progression of biochemical and morphological phases and events that occur in a cell during successive cell replication or nuclear replication events. Canonically, the cell cycle comprises the replication and segregation of genetic material followed by the division of the cell, but in endocycles or syncytial cells nuclear replication or nuclear division may not be followed by cell division.	BP	5.63547e-06	262	1882	170688	1602382	0.00116982	55355	HJURP
bp.955	GO:0007049	cell cycle	The progression of biochemical and morphological phases and events that occur in a cell during successive cell replication or nuclear replication events. Canonically, the cell cycle comprises the replication and segregation of genetic material followed by the division of the cell, but in endocycles or syncytial cells nuclear replication or nuclear division may not be followed by cell division.	BP	5.63547e-06	262	1882	170688	1602382	0.00116982	132660	LIN54
bp.956	GO:0007049	cell cycle	The progression of biochemical and morphological phases and events that occur in a cell during successive cell replication or nuclear replication events. Canonically, the cell cycle comprises the replication and segregation of genetic material followed by the division of the cell, but in endocycles or syncytial cells nuclear replication or nuclear division may not be followed by cell division.	BP	5.63547e-06	262	1882	170688	1602382	0.00116982	9184	BUB3
bp.957	GO:0007049	cell cycle	The progression of biochemical and morphological phases and events that occur in a cell during successive cell replication or nuclear replication events. Canonically, the cell cycle comprises the replication and segregation of genetic material followed by the division of the cell, but in endocycles or syncytial cells nuclear replication or nuclear division may not be followed by cell division.	BP	5.63547e-06	262	1882	170688	1602382	0.00116982	1063	CENPF
bp.958	GO:0007049	cell cycle	The progression of biochemical and morphological phases and events that occur in a cell during successive cell replication or nuclear replication events. Canonically, the cell cycle comprises the replication and segregation of genetic material followed by the division of the cell, but in endocycles or syncytial cells nuclear replication or nuclear division may not be followed by cell division.	BP	5.63547e-06	262	1882	170688	1602382	0.00116982	29997	GLTSCR2
bp.959	GO:0007049	cell cycle	The progression of biochemical and morphological phases and events that occur in a cell during successive cell replication or nuclear replication events. Canonically, the cell cycle comprises the replication and segregation of genetic material followed by the division of the cell, but in endocycles or syncytial cells nuclear replication or nuclear division may not be followed by cell division.	BP	5.63547e-06	262	1882	170688	1602382	0.00116982	2260	FGFR1
bp.960	GO:0007049	cell cycle	The progression of biochemical and morphological phases and events that occur in a cell during successive cell replication or nuclear replication events. Canonically, the cell cycle comprises the replication and segregation of genetic material followed by the division of the cell, but in endocycles or syncytial cells nuclear replication or nuclear division may not be followed by cell division.	BP	5.63547e-06	262	1882	170688	1602382	0.00116982	375	ARF1
bp.961	GO:0007049	cell cycle	The progression of biochemical and morphological phases and events that occur in a cell during successive cell replication or nuclear replication events. Canonically, the cell cycle comprises the replication and segregation of genetic material followed by the division of the cell, but in endocycles or syncytial cells nuclear replication or nuclear division may not be followed by cell division.	BP	5.63547e-06	262	1882	170688	1602382	0.00116982	341019	DCDC1
bp.962	GO:0007049	cell cycle	The progression of biochemical and morphological phases and events that occur in a cell during successive cell replication or nuclear replication events. Canonically, the cell cycle comprises the replication and segregation of genetic material followed by the division of the cell, but in endocycles or syncytial cells nuclear replication or nuclear division may not be followed by cell division.	BP	5.63547e-06	262	1882	170688	1602382	0.00116982	6711	SPTBN1
bp.963	GO:0007049	cell cycle	The progression of biochemical and morphological phases and events that occur in a cell during successive cell replication or nuclear replication events. Canonically, the cell cycle comprises the replication and segregation of genetic material followed by the division of the cell, but in endocycles or syncytial cells nuclear replication or nuclear division may not be followed by cell division.	BP	5.63547e-06	262	1882	170688	1602382	0.00116982	80124	VCPIP1
bp.964	GO:0007049	cell cycle	The progression of biochemical and morphological phases and events that occur in a cell during successive cell replication or nuclear replication events. Canonically, the cell cycle comprises the replication and segregation of genetic material followed by the division of the cell, but in endocycles or syncytial cells nuclear replication or nuclear division may not be followed by cell division.	BP	5.63547e-06	262	1882	170688	1602382	0.00116982	113130	CDCA5
bp.965	GO:0007049	cell cycle	The progression of biochemical and morphological phases and events that occur in a cell during successive cell replication or nuclear replication events. Canonically, the cell cycle comprises the replication and segregation of genetic material followed by the division of the cell, but in endocycles or syncytial cells nuclear replication or nuclear division may not be followed by cell division.	BP	5.63547e-06	262	1882	170688	1602382	0.00116982	10634	GAS2L1
bp.966	GO:0007049	cell cycle	The progression of biochemical and morphological phases and events that occur in a cell during successive cell replication or nuclear replication events. Canonically, the cell cycle comprises the replication and segregation of genetic material followed by the division of the cell, but in endocycles or syncytial cells nuclear replication or nuclear division may not be followed by cell division.	BP	5.63547e-06	262	1882	170688	1602382	0.00116982	3373	HYAL1
bp.967	GO:0007049	cell cycle	The progression of biochemical and morphological phases and events that occur in a cell during successive cell replication or nuclear replication events. Canonically, the cell cycle comprises the replication and segregation of genetic material followed by the division of the cell, but in endocycles or syncytial cells nuclear replication or nuclear division may not be followed by cell division.	BP	5.63547e-06	262	1882	170688	1602382	0.00116982	677	ZFP36L1
bp.968	GO:0007049	cell cycle	The progression of biochemical and morphological phases and events that occur in a cell during successive cell replication or nuclear replication events. Canonically, the cell cycle comprises the replication and segregation of genetic material followed by the division of the cell, but in endocycles or syncytial cells nuclear replication or nuclear division may not be followed by cell division.	BP	5.63547e-06	262	1882	170688	1602382	0.00116982	58190	CTDSP1
bp.969	GO:0007049	cell cycle	The progression of biochemical and morphological phases and events that occur in a cell during successive cell replication or nuclear replication events. Canonically, the cell cycle comprises the replication and segregation of genetic material followed by the division of the cell, but in endocycles or syncytial cells nuclear replication or nuclear division may not be followed by cell division.	BP	5.63547e-06	262	1882	170688	1602382	0.00116982	51507	RTFDC1
bp.970	GO:0007049	cell cycle	The progression of biochemical and morphological phases and events that occur in a cell during successive cell replication or nuclear replication events. Canonically, the cell cycle comprises the replication and segregation of genetic material followed by the division of the cell, but in endocycles or syncytial cells nuclear replication or nuclear division may not be followed by cell division.	BP	5.63547e-06	262	1882	170688	1602382	0.00116982	6347	CCL2
bp.971	GO:0007049	cell cycle	The progression of biochemical and morphological phases and events that occur in a cell during successive cell replication or nuclear replication events. Canonically, the cell cycle comprises the replication and segregation of genetic material followed by the division of the cell, but in endocycles or syncytial cells nuclear replication or nuclear division may not be followed by cell division.	BP	5.63547e-06	262	1882	170688	1602382	0.00116982	9183	ZW10
bp.972	GO:0007049	cell cycle	The progression of biochemical and morphological phases and events that occur in a cell during successive cell replication or nuclear replication events. Canonically, the cell cycle comprises the replication and segregation of genetic material followed by the division of the cell, but in endocycles or syncytial cells nuclear replication or nuclear division may not be followed by cell division.	BP	5.63547e-06	262	1882	170688	1602382	0.00116982	146956	EME1
bp.973	GO:0007049	cell cycle	The progression of biochemical and morphological phases and events that occur in a cell during successive cell replication or nuclear replication events. Canonically, the cell cycle comprises the replication and segregation of genetic material followed by the division of the cell, but in endocycles or syncytial cells nuclear replication or nuclear division may not be followed by cell division.	BP	5.63547e-06	262	1882	170688	1602382	0.00116982	10269	ZMPSTE24
bp.974	GO:0007049	cell cycle	The progression of biochemical and morphological phases and events that occur in a cell during successive cell replication or nuclear replication events. Canonically, the cell cycle comprises the replication and segregation of genetic material followed by the division of the cell, but in endocycles or syncytial cells nuclear replication or nuclear division may not be followed by cell division.	BP	5.63547e-06	262	1882	170688	1602382	0.00116982	161829	EXD1
bp.975	GO:0007049	cell cycle	The progression of biochemical and morphological phases and events that occur in a cell during successive cell replication or nuclear replication events. Canonically, the cell cycle comprises the replication and segregation of genetic material followed by the division of the cell, but in endocycles or syncytial cells nuclear replication or nuclear division may not be followed by cell division.	BP	5.63547e-06	262	1882	170688	1602382	0.00116982	10912	GADD45G
bp.976	GO:0007049	cell cycle	The progression of biochemical and morphological phases and events that occur in a cell during successive cell replication or nuclear replication events. Canonically, the cell cycle comprises the replication and segregation of genetic material followed by the division of the cell, but in endocycles or syncytial cells nuclear replication or nuclear division may not be followed by cell division.	BP	5.63547e-06	262	1882	170688	1602382	0.00116982	29781	NCAPH2
bp.977	GO:0007049	cell cycle	The progression of biochemical and morphological phases and events that occur in a cell during successive cell replication or nuclear replication events. Canonically, the cell cycle comprises the replication and segregation of genetic material followed by the division of the cell, but in endocycles or syncytial cells nuclear replication or nuclear division may not be followed by cell division.	BP	5.63547e-06	262	1882	170688	1602382	0.00116982	23172	FAM175B
bp.978	GO:0007049	cell cycle	The progression of biochemical and morphological phases and events that occur in a cell during successive cell replication or nuclear replication events. Canonically, the cell cycle comprises the replication and segregation of genetic material followed by the division of the cell, but in endocycles or syncytial cells nuclear replication or nuclear division may not be followed by cell division.	BP	5.63547e-06	262	1882	170688	1602382	0.00116982	148479	PHF13
bp.979	GO:0007049	cell cycle	The progression of biochemical and morphological phases and events that occur in a cell during successive cell replication or nuclear replication events. Canonically, the cell cycle comprises the replication and segregation of genetic material followed by the division of the cell, but in endocycles or syncytial cells nuclear replication or nuclear division may not be followed by cell division.	BP	5.63547e-06	262	1882	170688	1602382	0.00116982	55055	ZWILCH
bp.980	GO:0007049	cell cycle	The progression of biochemical and morphological phases and events that occur in a cell during successive cell replication or nuclear replication events. Canonically, the cell cycle comprises the replication and segregation of genetic material followed by the division of the cell, but in endocycles or syncytial cells nuclear replication or nuclear division may not be followed by cell division.	BP	5.63547e-06	262	1882	170688	1602382	0.00116982	64859	NABP1
bp.981	GO:0007049	cell cycle	The progression of biochemical and morphological phases and events that occur in a cell during successive cell replication or nuclear replication events. Canonically, the cell cycle comprises the replication and segregation of genetic material followed by the division of the cell, but in endocycles or syncytial cells nuclear replication or nuclear division may not be followed by cell division.	BP	5.63547e-06	262	1882	170688	1602382	0.00116982	2620	GAS2
bp.982	GO:0007049	cell cycle	The progression of biochemical and morphological phases and events that occur in a cell during successive cell replication or nuclear replication events. Canonically, the cell cycle comprises the replication and segregation of genetic material followed by the division of the cell, but in endocycles or syncytial cells nuclear replication or nuclear division may not be followed by cell division.	BP	5.63547e-06	262	1882	170688	1602382	0.00116982	6774	STAT3
bp.983	GO:0007049	cell cycle	The progression of biochemical and morphological phases and events that occur in a cell during successive cell replication or nuclear replication events. Canonically, the cell cycle comprises the replication and segregation of genetic material followed by the division of the cell, but in endocycles or syncytial cells nuclear replication or nuclear division may not be followed by cell division.	BP	5.63547e-06	262	1882	170688	1602382	0.00116982	1490	CTGF
bp.984	GO:0007049	cell cycle	The progression of biochemical and morphological phases and events that occur in a cell during successive cell replication or nuclear replication events. Canonically, the cell cycle comprises the replication and segregation of genetic material followed by the division of the cell, but in endocycles or syncytial cells nuclear replication or nuclear division may not be followed by cell division.	BP	5.63547e-06	262	1882	170688	1602382	0.00116982	7320	UBE2B
bp.985	GO:0007049	cell cycle	The progression of biochemical and morphological phases and events that occur in a cell during successive cell replication or nuclear replication events. Canonically, the cell cycle comprises the replication and segregation of genetic material followed by the division of the cell, but in endocycles or syncytial cells nuclear replication or nuclear division may not be followed by cell division.	BP	5.63547e-06	262	1882	170688	1602382	0.00116982	80139	ZNF703
bp.986	GO:0007049	cell cycle	The progression of biochemical and morphological phases and events that occur in a cell during successive cell replication or nuclear replication events. Canonically, the cell cycle comprises the replication and segregation of genetic material followed by the division of the cell, but in endocycles or syncytial cells nuclear replication or nuclear division may not be followed by cell division.	BP	5.63547e-06	262	1882	170688	1602382	0.00116982	10039	PARP3
bp.987	GO:0007049	cell cycle	The progression of biochemical and morphological phases and events that occur in a cell during successive cell replication or nuclear replication events. Canonically, the cell cycle comprises the replication and segregation of genetic material followed by the division of the cell, but in endocycles or syncytial cells nuclear replication or nuclear division may not be followed by cell division.	BP	5.63547e-06	262	1882	170688	1602382	0.00116982	11140	CDC37
bp.988	GO:0007049	cell cycle	The progression of biochemical and morphological phases and events that occur in a cell during successive cell replication or nuclear replication events. Canonically, the cell cycle comprises the replication and segregation of genetic material followed by the division of the cell, but in endocycles or syncytial cells nuclear replication or nuclear division may not be followed by cell division.	BP	5.63547e-06	262	1882	170688	1602382	0.00116982	56339	METTL3
bp.989	GO:0007049	cell cycle	The progression of biochemical and morphological phases and events that occur in a cell during successive cell replication or nuclear replication events. Canonically, the cell cycle comprises the replication and segregation of genetic material followed by the division of the cell, but in endocycles or syncytial cells nuclear replication or nuclear division may not be followed by cell division.	BP	5.63547e-06	262	1882	170688	1602382	0.00116982	55165	CEP55
bp.990	GO:0007049	cell cycle	The progression of biochemical and morphological phases and events that occur in a cell during successive cell replication or nuclear replication events. Canonically, the cell cycle comprises the replication and segregation of genetic material followed by the division of the cell, but in endocycles or syncytial cells nuclear replication or nuclear division may not be followed by cell division.	BP	5.63547e-06	262	1882	170688	1602382	0.00116982	80218	NAA50
bp.991	GO:0007049	cell cycle	The progression of biochemical and morphological phases and events that occur in a cell during successive cell replication or nuclear replication events. Canonically, the cell cycle comprises the replication and segregation of genetic material followed by the division of the cell, but in endocycles or syncytial cells nuclear replication or nuclear division may not be followed by cell division.	BP	5.63547e-06	262	1882	170688	1602382	0.00116982	131601	TPRA1
bp.992	GO:0007049	cell cycle	The progression of biochemical and morphological phases and events that occur in a cell during successive cell replication or nuclear replication events. Canonically, the cell cycle comprises the replication and segregation of genetic material followed by the division of the cell, but in endocycles or syncytial cells nuclear replication or nuclear division may not be followed by cell division.	BP	5.63547e-06	262	1882	170688	1602382	0.00116982	4212	MEIS2
bp.993	GO:0007049	cell cycle	The progression of biochemical and morphological phases and events that occur in a cell during successive cell replication or nuclear replication events. Canonically, the cell cycle comprises the replication and segregation of genetic material followed by the division of the cell, but in endocycles or syncytial cells nuclear replication or nuclear division may not be followed by cell division.	BP	5.63547e-06	262	1882	170688	1602382	0.00116982	3622	ING2
bp.994	GO:0007049	cell cycle	The progression of biochemical and morphological phases and events that occur in a cell during successive cell replication or nuclear replication events. Canonically, the cell cycle comprises the replication and segregation of genetic material followed by the division of the cell, but in endocycles or syncytial cells nuclear replication or nuclear division may not be followed by cell division.	BP	5.63547e-06	262	1882	170688	1602382	0.00116982	56257	MEPCE
bp.995	GO:0007049	cell cycle	The progression of biochemical and morphological phases and events that occur in a cell during successive cell replication or nuclear replication events. Canonically, the cell cycle comprises the replication and segregation of genetic material followed by the division of the cell, but in endocycles or syncytial cells nuclear replication or nuclear division may not be followed by cell division.	BP	5.63547e-06	262	1882	170688	1602382	0.00116982	10609	P3H4
bp.996	GO:0007049	cell cycle	The progression of biochemical and morphological phases and events that occur in a cell during successive cell replication or nuclear replication events. Canonically, the cell cycle comprises the replication and segregation of genetic material followed by the division of the cell, but in endocycles or syncytial cells nuclear replication or nuclear division may not be followed by cell division.	BP	5.63547e-06	262	1882	170688	1602382	0.00116982	678	ZFP36L2
bp.997	GO:0007049	cell cycle	The progression of biochemical and morphological phases and events that occur in a cell during successive cell replication or nuclear replication events. Canonically, the cell cycle comprises the replication and segregation of genetic material followed by the division of the cell, but in endocycles or syncytial cells nuclear replication or nuclear division may not be followed by cell division.	BP	5.63547e-06	262	1882	170688	1602382	0.00116982	6154	RPL26
bp.998	GO:0007049	cell cycle	The progression of biochemical and morphological phases and events that occur in a cell during successive cell replication or nuclear replication events. Canonically, the cell cycle comprises the replication and segregation of genetic material followed by the division of the cell, but in endocycles or syncytial cells nuclear replication or nuclear division may not be followed by cell division.	BP	5.63547e-06	262	1882	170688	1602382	0.00116982	5292	PIM1
bp.999	GO:0007049	cell cycle	The progression of biochemical and morphological phases and events that occur in a cell during successive cell replication or nuclear replication events. Canonically, the cell cycle comprises the replication and segregation of genetic material followed by the division of the cell, but in endocycles or syncytial cells nuclear replication or nuclear division may not be followed by cell division.	BP	5.63547e-06	262	1882	170688	1602382	0.00116982	8929	PHOX2B
bp.1000	GO:0007049	cell cycle	The progression of biochemical and morphological phases and events that occur in a cell during successive cell replication or nuclear replication events. Canonically, the cell cycle comprises the replication and segregation of genetic material followed by the division of the cell, but in endocycles or syncytial cells nuclear replication or nuclear division may not be followed by cell division.	BP	5.63547e-06	262	1882	170688	1602382	0.00116982	80010	RMI1
bp.1001	GO:0007049	cell cycle	The progression of biochemical and morphological phases and events that occur in a cell during successive cell replication or nuclear replication events. Canonically, the cell cycle comprises the replication and segregation of genetic material followed by the division of the cell, but in endocycles or syncytial cells nuclear replication or nuclear division may not be followed by cell division.	BP	5.63547e-06	262	1882	170688	1602382	0.00116982	79023	NUP37
bp.1002	GO:0007049	cell cycle	The progression of biochemical and morphological phases and events that occur in a cell during successive cell replication or nuclear replication events. Canonically, the cell cycle comprises the replication and segregation of genetic material followed by the division of the cell, but in endocycles or syncytial cells nuclear replication or nuclear division may not be followed by cell division.	BP	5.63547e-06	262	1882	170688	1602382	0.00116982	23503	ZFYVE26
bp.1003	GO:0007049	cell cycle	The progression of biochemical and morphological phases and events that occur in a cell during successive cell replication or nuclear replication events. Canonically, the cell cycle comprises the replication and segregation of genetic material followed by the division of the cell, but in endocycles or syncytial cells nuclear replication or nuclear division may not be followed by cell division.	BP	5.63547e-06	262	1882	170688	1602382	0.00116982	6240	RRM1
bp.1004	GO:0007049	cell cycle	The progression of biochemical and morphological phases and events that occur in a cell during successive cell replication or nuclear replication events. Canonically, the cell cycle comprises the replication and segregation of genetic material followed by the division of the cell, but in endocycles or syncytial cells nuclear replication or nuclear division may not be followed by cell division.	BP	5.63547e-06	262	1882	170688	1602382	0.00116982	55193	PBRM1
bp.1005	GO:0007049	cell cycle	The progression of biochemical and morphological phases and events that occur in a cell during successive cell replication or nuclear replication events. Canonically, the cell cycle comprises the replication and segregation of genetic material followed by the division of the cell, but in endocycles or syncytial cells nuclear replication or nuclear division may not be followed by cell division.	BP	5.63547e-06	262	1882	170688	1602382	0.00116982	11331	PHB2
bp.1006	GO:0007049	cell cycle	The progression of biochemical and morphological phases and events that occur in a cell during successive cell replication or nuclear replication events. Canonically, the cell cycle comprises the replication and segregation of genetic material followed by the division of the cell, but in endocycles or syncytial cells nuclear replication or nuclear division may not be followed by cell division.	BP	5.63547e-06	262	1882	170688	1602382	0.00116982	10735	STAG2
bp.1007	GO:0007049	cell cycle	The progression of biochemical and morphological phases and events that occur in a cell during successive cell replication or nuclear replication events. Canonically, the cell cycle comprises the replication and segregation of genetic material followed by the division of the cell, but in endocycles or syncytial cells nuclear replication or nuclear division may not be followed by cell division.	BP	5.63547e-06	262	1882	170688	1602382	0.00116982	581	BAX
bp.1008	GO:0007049	cell cycle	The progression of biochemical and morphological phases and events that occur in a cell during successive cell replication or nuclear replication events. Canonically, the cell cycle comprises the replication and segregation of genetic material followed by the division of the cell, but in endocycles or syncytial cells nuclear replication or nuclear division may not be followed by cell division.	BP	5.63547e-06	262	1882	170688	1602382	0.00116982	134353	LSM11
bp.1009	GO:0007049	cell cycle	The progression of biochemical and morphological phases and events that occur in a cell during successive cell replication or nuclear replication events. Canonically, the cell cycle comprises the replication and segregation of genetic material followed by the division of the cell, but in endocycles or syncytial cells nuclear replication or nuclear division may not be followed by cell division.	BP	5.63547e-06	262	1882	170688	1602382	0.00116982	11339	OIP5
bp.1010	GO:0007049	cell cycle	The progression of biochemical and morphological phases and events that occur in a cell during successive cell replication or nuclear replication events. Canonically, the cell cycle comprises the replication and segregation of genetic material followed by the division of the cell, but in endocycles or syncytial cells nuclear replication or nuclear division may not be followed by cell division.	BP	5.63547e-06	262	1882	170688	1602382	0.00116982	5501	PPP1CC
bp.1011	GO:0007049	cell cycle	The progression of biochemical and morphological phases and events that occur in a cell during successive cell replication or nuclear replication events. Canonically, the cell cycle comprises the replication and segregation of genetic material followed by the division of the cell, but in endocycles or syncytial cells nuclear replication or nuclear division may not be followed by cell division.	BP	5.63547e-06	262	1882	170688	1602382	0.00116982	901	CCNG2
bp.1012	GO:0007049	cell cycle	The progression of biochemical and morphological phases and events that occur in a cell during successive cell replication or nuclear replication events. Canonically, the cell cycle comprises the replication and segregation of genetic material followed by the division of the cell, but in endocycles or syncytial cells nuclear replication or nuclear division may not be followed by cell division.	BP	5.63547e-06	262	1882	170688	1602382	0.00116982	1326	MAP3K8
bp.1013	GO:0007049	cell cycle	The progression of biochemical and morphological phases and events that occur in a cell during successive cell replication or nuclear replication events. Canonically, the cell cycle comprises the replication and segregation of genetic material followed by the division of the cell, but in endocycles or syncytial cells nuclear replication or nuclear division may not be followed by cell division.	BP	5.63547e-06	262	1882	170688	1602382	0.00116982	5686	PSMA5
bp.1014	GO:0007049	cell cycle	The progression of biochemical and morphological phases and events that occur in a cell during successive cell replication or nuclear replication events. Canonically, the cell cycle comprises the replication and segregation of genetic material followed by the division of the cell, but in endocycles or syncytial cells nuclear replication or nuclear division may not be followed by cell division.	BP	5.63547e-06	262	1882	170688	1602382	0.00116982	10116	FEM1B
bp.1015	GO:0007049	cell cycle	The progression of biochemical and morphological phases and events that occur in a cell during successive cell replication or nuclear replication events. Canonically, the cell cycle comprises the replication and segregation of genetic material followed by the division of the cell, but in endocycles or syncytial cells nuclear replication or nuclear division may not be followed by cell division.	BP	5.63547e-06	262	1882	170688	1602382	0.00116982	9960	USP3
bp.1016	GO:0007049	cell cycle	The progression of biochemical and morphological phases and events that occur in a cell during successive cell replication or nuclear replication events. Canonically, the cell cycle comprises the replication and segregation of genetic material followed by the division of the cell, but in endocycles or syncytial cells nuclear replication or nuclear division may not be followed by cell division.	BP	5.63547e-06	262	1882	170688	1602382	0.00116982	699	BUB1
bp.1017	GO:0007049	cell cycle	The progression of biochemical and morphological phases and events that occur in a cell during successive cell replication or nuclear replication events. Canonically, the cell cycle comprises the replication and segregation of genetic material followed by the division of the cell, but in endocycles or syncytial cells nuclear replication or nuclear division may not be followed by cell division.	BP	5.63547e-06	262	1882	170688	1602382	0.00116982	55294	FBXW7
bp.1018	GO:0007049	cell cycle	The progression of biochemical and morphological phases and events that occur in a cell during successive cell replication or nuclear replication events. Canonically, the cell cycle comprises the replication and segregation of genetic material followed by the division of the cell, but in endocycles or syncytial cells nuclear replication or nuclear division may not be followed by cell division.	BP	5.63547e-06	262	1882	170688	1602382	0.00116982	8881	CDC16
bp.1019	GO:0007049	cell cycle	The progression of biochemical and morphological phases and events that occur in a cell during successive cell replication or nuclear replication events. Canonically, the cell cycle comprises the replication and segregation of genetic material followed by the division of the cell, but in endocycles or syncytial cells nuclear replication or nuclear division may not be followed by cell division.	BP	5.63547e-06	262	1882	170688	1602382	0.00116982	57472	CNOT6
bp.1020	GO:0007049	cell cycle	The progression of biochemical and morphological phases and events that occur in a cell during successive cell replication or nuclear replication events. Canonically, the cell cycle comprises the replication and segregation of genetic material followed by the division of the cell, but in endocycles or syncytial cells nuclear replication or nuclear division may not be followed by cell division.	BP	5.63547e-06	262	1882	170688	1602382	0.00116982	23304	UBR2
bp.1021	GO:0007049	cell cycle	The progression of biochemical and morphological phases and events that occur in a cell during successive cell replication or nuclear replication events. Canonically, the cell cycle comprises the replication and segregation of genetic material followed by the division of the cell, but in endocycles or syncytial cells nuclear replication or nuclear division may not be followed by cell division.	BP	5.63547e-06	262	1882	170688	1602382	0.00116982	123879	DCUN1D3
bp.1022	GO:0007049	cell cycle	The progression of biochemical and morphological phases and events that occur in a cell during successive cell replication or nuclear replication events. Canonically, the cell cycle comprises the replication and segregation of genetic material followed by the division of the cell, but in endocycles or syncytial cells nuclear replication or nuclear division may not be followed by cell division.	BP	5.63547e-06	262	1882	170688	1602382	0.00116982	8945	BTRC
bp.1023	GO:0007049	cell cycle	The progression of biochemical and morphological phases and events that occur in a cell during successive cell replication or nuclear replication events. Canonically, the cell cycle comprises the replication and segregation of genetic material followed by the division of the cell, but in endocycles or syncytial cells nuclear replication or nuclear division may not be followed by cell division.	BP	5.63547e-06	262	1882	170688	1602382	0.00116982	29882	ANAPC2
bp.1024	GO:0007049	cell cycle	The progression of biochemical and morphological phases and events that occur in a cell during successive cell replication or nuclear replication events. Canonically, the cell cycle comprises the replication and segregation of genetic material followed by the division of the cell, but in endocycles or syncytial cells nuclear replication or nuclear division may not be followed by cell division.	BP	5.63547e-06	262	1882	170688	1602382	0.00116982	115098	CCDC124
bp.1025	GO:0007049	cell cycle	The progression of biochemical and morphological phases and events that occur in a cell during successive cell replication or nuclear replication events. Canonically, the cell cycle comprises the replication and segregation of genetic material followed by the division of the cell, but in endocycles or syncytial cells nuclear replication or nuclear division may not be followed by cell division.	BP	5.63547e-06	262	1882	170688	1602382	0.00116982	25936	NSL1
bp.1026	GO:0007049	cell cycle	The progression of biochemical and morphological phases and events that occur in a cell during successive cell replication or nuclear replication events. Canonically, the cell cycle comprises the replication and segregation of genetic material followed by the division of the cell, but in endocycles or syncytial cells nuclear replication or nuclear division may not be followed by cell division.	BP	5.63547e-06	262	1882	170688	1602382	0.00116982	136647	MPLKIP
bp.1027	GO:0007049	cell cycle	The progression of biochemical and morphological phases and events that occur in a cell during successive cell replication or nuclear replication events. Canonically, the cell cycle comprises the replication and segregation of genetic material followed by the division of the cell, but in endocycles or syncytial cells nuclear replication or nuclear division may not be followed by cell division.	BP	5.63547e-06	262	1882	170688	1602382	0.00116982	5691	PSMB3
bp.1028	GO:0007049	cell cycle	The progression of biochemical and morphological phases and events that occur in a cell during successive cell replication or nuclear replication events. Canonically, the cell cycle comprises the replication and segregation of genetic material followed by the division of the cell, but in endocycles or syncytial cells nuclear replication or nuclear division may not be followed by cell division.	BP	5.63547e-06	262	1882	170688	1602382	0.00116982	55771	PRR11
bp.1029	GO:0007049	cell cycle	The progression of biochemical and morphological phases and events that occur in a cell during successive cell replication or nuclear replication events. Canonically, the cell cycle comprises the replication and segregation of genetic material followed by the division of the cell, but in endocycles or syncytial cells nuclear replication or nuclear division may not be followed by cell division.	BP	5.63547e-06	262	1882	170688	1602382	0.00116982	114799	ESCO1
bp.1030	GO:0007049	cell cycle	The progression of biochemical and morphological phases and events that occur in a cell during successive cell replication or nuclear replication events. Canonically, the cell cycle comprises the replication and segregation of genetic material followed by the division of the cell, but in endocycles or syncytial cells nuclear replication or nuclear division may not be followed by cell division.	BP	5.63547e-06	262	1882	170688	1602382	0.00116982	10274	STAG1
bp.1031	GO:0007049	cell cycle	The progression of biochemical and morphological phases and events that occur in a cell during successive cell replication or nuclear replication events. Canonically, the cell cycle comprises the replication and segregation of genetic material followed by the division of the cell, but in endocycles or syncytial cells nuclear replication or nuclear division may not be followed by cell division.	BP	5.63547e-06	262	1882	170688	1602382	0.00116982	4591	TRIM37
bp.1032	GO:0007049	cell cycle	The progression of biochemical and morphological phases and events that occur in a cell during successive cell replication or nuclear replication events. Canonically, the cell cycle comprises the replication and segregation of genetic material followed by the division of the cell, but in endocycles or syncytial cells nuclear replication or nuclear division may not be followed by cell division.	BP	5.63547e-06	262	1882	170688	1602382	0.00116982	10426	TUBGCP3
bp.1033	GO:0007049	cell cycle	The progression of biochemical and morphological phases and events that occur in a cell during successive cell replication or nuclear replication events. Canonically, the cell cycle comprises the replication and segregation of genetic material followed by the division of the cell, but in endocycles or syncytial cells nuclear replication or nuclear division may not be followed by cell division.	BP	5.63547e-06	262	1882	170688	1602382	0.00116982	4487	MSX1
bp.1034	GO:0007049	cell cycle	The progression of biochemical and morphological phases and events that occur in a cell during successive cell replication or nuclear replication events. Canonically, the cell cycle comprises the replication and segregation of genetic material followed by the division of the cell, but in endocycles or syncytial cells nuclear replication or nuclear division may not be followed by cell division.	BP	5.63547e-06	262	1882	170688	1602382	0.00116982	10253	SPRY2
bp.1035	GO:0007049	cell cycle	The progression of biochemical and morphological phases and events that occur in a cell during successive cell replication or nuclear replication events. Canonically, the cell cycle comprises the replication and segregation of genetic material followed by the division of the cell, but in endocycles or syncytial cells nuclear replication or nuclear division may not be followed by cell division.	BP	5.63547e-06	262	1882	170688	1602382	0.00116982	8086	AAAS
bp.1036	GO:0007049	cell cycle	The progression of biochemical and morphological phases and events that occur in a cell during successive cell replication or nuclear replication events. Canonically, the cell cycle comprises the replication and segregation of genetic material followed by the division of the cell, but in endocycles or syncytial cells nuclear replication or nuclear division may not be followed by cell division.	BP	5.63547e-06	262	1882	170688	1602382	0.00116982	51343	FZR1
bp.1037	GO:0007049	cell cycle	The progression of biochemical and morphological phases and events that occur in a cell during successive cell replication or nuclear replication events. Canonically, the cell cycle comprises the replication and segregation of genetic material followed by the division of the cell, but in endocycles or syncytial cells nuclear replication or nuclear division may not be followed by cell division.	BP	5.63547e-06	262	1882	170688	1602382	0.00116982	8636	SSNA1
bp.1038	GO:0007049	cell cycle	The progression of biochemical and morphological phases and events that occur in a cell during successive cell replication or nuclear replication events. Canonically, the cell cycle comprises the replication and segregation of genetic material followed by the division of the cell, but in endocycles or syncytial cells nuclear replication or nuclear division may not be followed by cell division.	BP	5.63547e-06	262	1882	170688	1602382	0.00116982	9555	H2AFY
bp.1039	GO:0007049	cell cycle	The progression of biochemical and morphological phases and events that occur in a cell during successive cell replication or nuclear replication events. Canonically, the cell cycle comprises the replication and segregation of genetic material followed by the division of the cell, but in endocycles or syncytial cells nuclear replication or nuclear division may not be followed by cell division.	BP	5.63547e-06	262	1882	170688	1602382	0.00116982	9134	CCNE2
bp.1040	GO:0007049	cell cycle	The progression of biochemical and morphological phases and events that occur in a cell during successive cell replication or nuclear replication events. Canonically, the cell cycle comprises the replication and segregation of genetic material followed by the division of the cell, but in endocycles or syncytial cells nuclear replication or nuclear division may not be followed by cell division.	BP	5.63547e-06	262	1882	170688	1602382	0.00116982	131405	TRIM71
bp.1041	GO:0007049	cell cycle	The progression of biochemical and morphological phases and events that occur in a cell during successive cell replication or nuclear replication events. Canonically, the cell cycle comprises the replication and segregation of genetic material followed by the division of the cell, but in endocycles or syncytial cells nuclear replication or nuclear division may not be followed by cell division.	BP	5.63547e-06	262	1882	170688	1602382	0.00116982	1875	E2F5
bp.1042	GO:0007049	cell cycle	The progression of biochemical and morphological phases and events that occur in a cell during successive cell replication or nuclear replication events. Canonically, the cell cycle comprises the replication and segregation of genetic material followed by the division of the cell, but in endocycles or syncytial cells nuclear replication or nuclear division may not be followed by cell division.	BP	5.63547e-06	262	1882	170688	1602382	0.00116982	284403	WDR62
bp.1043	GO:0007049	cell cycle	The progression of biochemical and morphological phases and events that occur in a cell during successive cell replication or nuclear replication events. Canonically, the cell cycle comprises the replication and segregation of genetic material followed by the division of the cell, but in endocycles or syncytial cells nuclear replication or nuclear division may not be followed by cell division.	BP	5.63547e-06	262	1882	170688	1602382	0.00116982	9150	CTDP1
bp.1044	GO:0007049	cell cycle	The progression of biochemical and morphological phases and events that occur in a cell during successive cell replication or nuclear replication events. Canonically, the cell cycle comprises the replication and segregation of genetic material followed by the division of the cell, but in endocycles or syncytial cells nuclear replication or nuclear division may not be followed by cell division.	BP	5.63547e-06	262	1882	170688	1602382	0.00116982	58490	RPRD1B
bp.1045	GO:0007049	cell cycle	The progression of biochemical and morphological phases and events that occur in a cell during successive cell replication or nuclear replication events. Canonically, the cell cycle comprises the replication and segregation of genetic material followed by the division of the cell, but in endocycles or syncytial cells nuclear replication or nuclear division may not be followed by cell division.	BP	5.63547e-06	262	1882	170688	1602382	0.00116982	200942	KLHDC8B
bp.1046	GO:0007049	cell cycle	The progression of biochemical and morphological phases and events that occur in a cell during successive cell replication or nuclear replication events. Canonically, the cell cycle comprises the replication and segregation of genetic material followed by the division of the cell, but in endocycles or syncytial cells nuclear replication or nuclear division may not be followed by cell division.	BP	5.63547e-06	262	1882	170688	1602382	0.00116982	10106	CTDSP2
bp.1047	GO:0007049	cell cycle	The progression of biochemical and morphological phases and events that occur in a cell during successive cell replication or nuclear replication events. Canonically, the cell cycle comprises the replication and segregation of genetic material followed by the division of the cell, but in endocycles or syncytial cells nuclear replication or nuclear division may not be followed by cell division.	BP	5.63547e-06	262	1882	170688	1602382	0.00116982	64946	CENPH
bp.1048	GO:0007049	cell cycle	The progression of biochemical and morphological phases and events that occur in a cell during successive cell replication or nuclear replication events. Canonically, the cell cycle comprises the replication and segregation of genetic material followed by the division of the cell, but in endocycles or syncytial cells nuclear replication or nuclear division may not be followed by cell division.	BP	5.63547e-06	262	1882	170688	1602382	0.00116982	578	BAK1
bp.1049	GO:0007049	cell cycle	The progression of biochemical and morphological phases and events that occur in a cell during successive cell replication or nuclear replication events. Canonically, the cell cycle comprises the replication and segregation of genetic material followed by the division of the cell, but in endocycles or syncytial cells nuclear replication or nuclear division may not be followed by cell division.	BP	5.63547e-06	262	1882	170688	1602382	0.00116982	317761	C14orf39
bp.1050	GO:0007049	cell cycle	The progression of biochemical and morphological phases and events that occur in a cell during successive cell replication or nuclear replication events. Canonically, the cell cycle comprises the replication and segregation of genetic material followed by the division of the cell, but in endocycles or syncytial cells nuclear replication or nuclear division may not be followed by cell division.	BP	5.63547e-06	262	1882	170688	1602382	0.00116982	9988	DMTF1
bp.1051	GO:0007049	cell cycle	The progression of biochemical and morphological phases and events that occur in a cell during successive cell replication or nuclear replication events. Canonically, the cell cycle comprises the replication and segregation of genetic material followed by the division of the cell, but in endocycles or syncytial cells nuclear replication or nuclear division may not be followed by cell division.	BP	5.63547e-06	262	1882	170688	1602382	0.00116982	4751	NEK2
bp.1052	GO:0007049	cell cycle	The progression of biochemical and morphological phases and events that occur in a cell during successive cell replication or nuclear replication events. Canonically, the cell cycle comprises the replication and segregation of genetic material followed by the division of the cell, but in endocycles or syncytial cells nuclear replication or nuclear division may not be followed by cell division.	BP	5.63547e-06	262	1882	170688	1602382	0.00116982	6790	AURKA
bp.1053	GO:0007049	cell cycle	The progression of biochemical and morphological phases and events that occur in a cell during successive cell replication or nuclear replication events. Canonically, the cell cycle comprises the replication and segregation of genetic material followed by the division of the cell, but in endocycles or syncytial cells nuclear replication or nuclear division may not be followed by cell division.	BP	5.63547e-06	262	1882	170688	1602382	0.00116982	64839	FBXL17
bp.1054	GO:0007049	cell cycle	The progression of biochemical and morphological phases and events that occur in a cell during successive cell replication or nuclear replication events. Canonically, the cell cycle comprises the replication and segregation of genetic material followed by the division of the cell, but in endocycles or syncytial cells nuclear replication or nuclear division may not be followed by cell division.	BP	5.63547e-06	262	1882	170688	1602382	0.00116982	4174	MCM5
bp.1055	GO:0007049	cell cycle	The progression of biochemical and morphological phases and events that occur in a cell during successive cell replication or nuclear replication events. Canonically, the cell cycle comprises the replication and segregation of genetic material followed by the division of the cell, but in endocycles or syncytial cells nuclear replication or nuclear division may not be followed by cell division.	BP	5.63547e-06	262	1882	170688	1602382	0.00116982	26574	AATF
bp.1056	GO:0007049	cell cycle	The progression of biochemical and morphological phases and events that occur in a cell during successive cell replication or nuclear replication events. Canonically, the cell cycle comprises the replication and segregation of genetic material followed by the division of the cell, but in endocycles or syncytial cells nuclear replication or nuclear division may not be followed by cell division.	BP	5.63547e-06	262	1882	170688	1602382	0.00116982	1024	CDK8
bp.1057	GO:0007049	cell cycle	The progression of biochemical and morphological phases and events that occur in a cell during successive cell replication or nuclear replication events. Canonically, the cell cycle comprises the replication and segregation of genetic material followed by the division of the cell, but in endocycles or syncytial cells nuclear replication or nuclear division may not be followed by cell division.	BP	5.63547e-06	262	1882	170688	1602382	0.00116982	81857	MED25
bp.1058	GO:0007049	cell cycle	The progression of biochemical and morphological phases and events that occur in a cell during successive cell replication or nuclear replication events. Canonically, the cell cycle comprises the replication and segregation of genetic material followed by the division of the cell, but in endocycles or syncytial cells nuclear replication or nuclear division may not be followed by cell division.	BP	5.63547e-06	262	1882	170688	1602382	0.00116982	57060	PCBP4
bp.1059	GO:0007049	cell cycle	The progression of biochemical and morphological phases and events that occur in a cell during successive cell replication or nuclear replication events. Canonically, the cell cycle comprises the replication and segregation of genetic material followed by the division of the cell, but in endocycles or syncytial cells nuclear replication or nuclear division may not be followed by cell division.	BP	5.63547e-06	262	1882	170688	1602382	0.00116982	7474	WNT5A
bp.1060	GO:0007049	cell cycle	The progression of biochemical and morphological phases and events that occur in a cell during successive cell replication or nuclear replication events. Canonically, the cell cycle comprises the replication and segregation of genetic material followed by the division of the cell, but in endocycles or syncytial cells nuclear replication or nuclear division may not be followed by cell division.	BP	5.63547e-06	262	1882	170688	1602382	0.00116982	51755	CDK12
bp.1061	GO:0007049	cell cycle	The progression of biochemical and morphological phases and events that occur in a cell during successive cell replication or nuclear replication events. Canonically, the cell cycle comprises the replication and segregation of genetic material followed by the division of the cell, but in endocycles or syncytial cells nuclear replication or nuclear division may not be followed by cell division.	BP	5.63547e-06	262	1882	170688	1602382	0.00116982	7917	BAG6
bp.1062	GO:0007049	cell cycle	The progression of biochemical and morphological phases and events that occur in a cell during successive cell replication or nuclear replication events. Canonically, the cell cycle comprises the replication and segregation of genetic material followed by the division of the cell, but in endocycles or syncytial cells nuclear replication or nuclear division may not be followed by cell division.	BP	5.63547e-06	262	1882	170688	1602382	0.00116982	85459	CEP295
bp.1063	GO:0007049	cell cycle	The progression of biochemical and morphological phases and events that occur in a cell during successive cell replication or nuclear replication events. Canonically, the cell cycle comprises the replication and segregation of genetic material followed by the division of the cell, but in endocycles or syncytial cells nuclear replication or nuclear division may not be followed by cell division.	BP	5.63547e-06	262	1882	170688	1602382	0.00116982	5777	PTPN6
bp.1064	GO:0007049	cell cycle	The progression of biochemical and morphological phases and events that occur in a cell during successive cell replication or nuclear replication events. Canonically, the cell cycle comprises the replication and segregation of genetic material followed by the division of the cell, but in endocycles or syncytial cells nuclear replication or nuclear division may not be followed by cell division.	BP	5.63547e-06	262	1882	170688	1602382	0.00116982	899	CCNF
bp.1065	GO:0007049	cell cycle	The progression of biochemical and morphological phases and events that occur in a cell during successive cell replication or nuclear replication events. Canonically, the cell cycle comprises the replication and segregation of genetic material followed by the division of the cell, but in endocycles or syncytial cells nuclear replication or nuclear division may not be followed by cell division.	BP	5.63547e-06	262	1882	170688	1602382	0.00116982	54930	HAUS4
bp.1066	GO:0007049	cell cycle	The progression of biochemical and morphological phases and events that occur in a cell during successive cell replication or nuclear replication events. Canonically, the cell cycle comprises the replication and segregation of genetic material followed by the division of the cell, but in endocycles or syncytial cells nuclear replication or nuclear division may not be followed by cell division.	BP	5.63547e-06	262	1882	170688	1602382	0.00116982	7248	TSC1
bp.1067	GO:0007049	cell cycle	The progression of biochemical and morphological phases and events that occur in a cell during successive cell replication or nuclear replication events. Canonically, the cell cycle comprises the replication and segregation of genetic material followed by the division of the cell, but in endocycles or syncytial cells nuclear replication or nuclear division may not be followed by cell division.	BP	5.63547e-06	262	1882	170688	1602382	0.00116982	1649	DDIT3
bp.1068	GO:0007049	cell cycle	The progression of biochemical and morphological phases and events that occur in a cell during successive cell replication or nuclear replication events. Canonically, the cell cycle comprises the replication and segregation of genetic material followed by the division of the cell, but in endocycles or syncytial cells nuclear replication or nuclear division may not be followed by cell division.	BP	5.63547e-06	262	1882	170688	1602382	0.00116982	4609	MYC
bp.1069	GO:0007049	cell cycle	The progression of biochemical and morphological phases and events that occur in a cell during successive cell replication or nuclear replication events. Canonically, the cell cycle comprises the replication and segregation of genetic material followed by the division of the cell, but in endocycles or syncytial cells nuclear replication or nuclear division may not be followed by cell division.	BP	5.63547e-06	262	1882	170688	1602382	0.00116982	84687	PPP1R9B
bp.1070	GO:0007049	cell cycle	The progression of biochemical and morphological phases and events that occur in a cell during successive cell replication or nuclear replication events. Canonically, the cell cycle comprises the replication and segregation of genetic material followed by the division of the cell, but in endocycles or syncytial cells nuclear replication or nuclear division may not be followed by cell division.	BP	5.63547e-06	262	1882	170688	1602382	0.00116982	128866	CHMP4B
bp.1071	GO:0007049	cell cycle	The progression of biochemical and morphological phases and events that occur in a cell during successive cell replication or nuclear replication events. Canonically, the cell cycle comprises the replication and segregation of genetic material followed by the division of the cell, but in endocycles or syncytial cells nuclear replication or nuclear division may not be followed by cell division.	BP	5.63547e-06	262	1882	170688	1602382	0.00116982	728642	CDK11A
bp.1072	GO:0007049	cell cycle	The progression of biochemical and morphological phases and events that occur in a cell during successive cell replication or nuclear replication events. Canonically, the cell cycle comprises the replication and segregation of genetic material followed by the division of the cell, but in endocycles or syncytial cells nuclear replication or nuclear division may not be followed by cell division.	BP	5.63547e-06	262	1882	170688	1602382	0.00116982	5591	PRKDC
bp.1073	GO:0007049	cell cycle	The progression of biochemical and morphological phases and events that occur in a cell during successive cell replication or nuclear replication events. Canonically, the cell cycle comprises the replication and segregation of genetic material followed by the division of the cell, but in endocycles or syncytial cells nuclear replication or nuclear division may not be followed by cell division.	BP	5.63547e-06	262	1882	170688	1602382	0.00116982	124817	CNTD1
bp.1074	GO:0007049	cell cycle	The progression of biochemical and morphological phases and events that occur in a cell during successive cell replication or nuclear replication events. Canonically, the cell cycle comprises the replication and segregation of genetic material followed by the division of the cell, but in endocycles or syncytial cells nuclear replication or nuclear division may not be followed by cell division.	BP	5.63547e-06	262	1882	170688	1602382	0.00116982	348654	GEN1
bp.1075	GO:0007049	cell cycle	The progression of biochemical and morphological phases and events that occur in a cell during successive cell replication or nuclear replication events. Canonically, the cell cycle comprises the replication and segregation of genetic material followed by the division of the cell, but in endocycles or syncytial cells nuclear replication or nuclear division may not be followed by cell division.	BP	5.63547e-06	262	1882	170688	1602382	0.00116982	10628	TXNIP
bp.1076	GO:0007049	cell cycle	The progression of biochemical and morphological phases and events that occur in a cell during successive cell replication or nuclear replication events. Canonically, the cell cycle comprises the replication and segregation of genetic material followed by the division of the cell, but in endocycles or syncytial cells nuclear replication or nuclear division may not be followed by cell division.	BP	5.63547e-06	262	1882	170688	1602382	0.00116982	2908	NR3C1
bp.1077	GO:0007049	cell cycle	The progression of biochemical and morphological phases and events that occur in a cell during successive cell replication or nuclear replication events. Canonically, the cell cycle comprises the replication and segregation of genetic material followed by the division of the cell, but in endocycles or syncytial cells nuclear replication or nuclear division may not be followed by cell division.	BP	5.63547e-06	262	1882	170688	1602382	0.00116982	805	CALM2
bp.1078	GO:0007049	cell cycle	The progression of biochemical and morphological phases and events that occur in a cell during successive cell replication or nuclear replication events. Canonically, the cell cycle comprises the replication and segregation of genetic material followed by the division of the cell, but in endocycles or syncytial cells nuclear replication or nuclear division may not be followed by cell division.	BP	5.63547e-06	262	1882	170688	1602382	0.00116982	4660	PPP1R12B
bp.1079	GO:0007049	cell cycle	The progression of biochemical and morphological phases and events that occur in a cell during successive cell replication or nuclear replication events. Canonically, the cell cycle comprises the replication and segregation of genetic material followed by the division of the cell, but in endocycles or syncytial cells nuclear replication or nuclear division may not be followed by cell division.	BP	5.63547e-06	262	1882	170688	1602382	0.00116982	1781	DYNC1I2
bp.1080	GO:0007049	cell cycle	The progression of biochemical and morphological phases and events that occur in a cell during successive cell replication or nuclear replication events. Canonically, the cell cycle comprises the replication and segregation of genetic material followed by the division of the cell, but in endocycles or syncytial cells nuclear replication or nuclear division may not be followed by cell division.	BP	5.63547e-06	262	1882	170688	1602382	0.00116982	54784	ALKBH4
bp.1081	GO:0007049	cell cycle	The progression of biochemical and morphological phases and events that occur in a cell during successive cell replication or nuclear replication events. Canonically, the cell cycle comprises the replication and segregation of genetic material followed by the division of the cell, but in endocycles or syncytial cells nuclear replication or nuclear division may not be followed by cell division.	BP	5.63547e-06	262	1882	170688	1602382	0.00116982	55755	CDK5RAP2
bp.1082	GO:0007049	cell cycle	The progression of biochemical and morphological phases and events that occur in a cell during successive cell replication or nuclear replication events. Canonically, the cell cycle comprises the replication and segregation of genetic material followed by the division of the cell, but in endocycles or syncytial cells nuclear replication or nuclear division may not be followed by cell division.	BP	5.63547e-06	262	1882	170688	1602382	0.00116982	28996	HIPK2
bp.1083	GO:0007049	cell cycle	The progression of biochemical and morphological phases and events that occur in a cell during successive cell replication or nuclear replication events. Canonically, the cell cycle comprises the replication and segregation of genetic material followed by the division of the cell, but in endocycles or syncytial cells nuclear replication or nuclear division may not be followed by cell division.	BP	5.63547e-06	262	1882	170688	1602382	0.00116982	57805	CCAR2
bp.1084	GO:0007049	cell cycle	The progression of biochemical and morphological phases and events that occur in a cell during successive cell replication or nuclear replication events. Canonically, the cell cycle comprises the replication and segregation of genetic material followed by the division of the cell, but in endocycles or syncytial cells nuclear replication or nuclear division may not be followed by cell division.	BP	5.63547e-06	262	1882	170688	1602382	0.00116982	25886	POC1A
bp.1085	GO:0007049	cell cycle	The progression of biochemical and morphological phases and events that occur in a cell during successive cell replication or nuclear replication events. Canonically, the cell cycle comprises the replication and segregation of genetic material followed by the division of the cell, but in endocycles or syncytial cells nuclear replication or nuclear division may not be followed by cell division.	BP	5.63547e-06	262	1882	170688	1602382	0.00116982	4779	NFE2L1
bp.1086	GO:0007049	cell cycle	The progression of biochemical and morphological phases and events that occur in a cell during successive cell replication or nuclear replication events. Canonically, the cell cycle comprises the replication and segregation of genetic material followed by the division of the cell, but in endocycles or syncytial cells nuclear replication or nuclear division may not be followed by cell division.	BP	5.63547e-06	262	1882	170688	1602382	0.00116982	54875	CNTLN
bp.1087	GO:0007049	cell cycle	The progression of biochemical and morphological phases and events that occur in a cell during successive cell replication or nuclear replication events. Canonically, the cell cycle comprises the replication and segregation of genetic material followed by the division of the cell, but in endocycles or syncytial cells nuclear replication or nuclear division may not be followed by cell division.	BP	5.63547e-06	262	1882	170688	1602382	0.00116982	81853	TMEM14B
bp.1088	GO:0007049	cell cycle	The progression of biochemical and morphological phases and events that occur in a cell during successive cell replication or nuclear replication events. Canonically, the cell cycle comprises the replication and segregation of genetic material followed by the division of the cell, but in endocycles or syncytial cells nuclear replication or nuclear division may not be followed by cell division.	BP	5.63547e-06	262	1882	170688	1602382	0.00116982	5914	RARA
bp.1089	GO:0007049	cell cycle	The progression of biochemical and morphological phases and events that occur in a cell during successive cell replication or nuclear replication events. Canonically, the cell cycle comprises the replication and segregation of genetic material followed by the division of the cell, but in endocycles or syncytial cells nuclear replication or nuclear division may not be followed by cell division.	BP	5.63547e-06	262	1882	170688	1602382	0.00116982	23116	FAM179B
bp.1090	GO:0007049	cell cycle	The progression of biochemical and morphological phases and events that occur in a cell during successive cell replication or nuclear replication events. Canonically, the cell cycle comprises the replication and segregation of genetic material followed by the division of the cell, but in endocycles or syncytial cells nuclear replication or nuclear division may not be followed by cell division.	BP	5.63547e-06	262	1882	170688	1602382	0.00116982	84306	PDCD2L
[truncated: 20,576 more rows]
