# Supplementary material for: Early anteroposterior regionalisation of human neural crest is shaped by a pro-mesodermal factor
Source: eLife. 2022 Sep 26;11:e74263. doi: 10.7554/eLife.74263 (PMC9536837; doi:10.7554/eLife.74263)
Supplement: Supplementary file 6. — Genes are listed in relation to the genomic position (in relation to TSS) of TBXT binding within their proximity. Blue highlight denotes downregulation while red represents upregulation in expression. [file elife-74263-supp6.xlsx]

## Sheet: -1000 to 0 bp
Gene.ID	Gene Name	Peak.Value	log2FoldChange	padj	Gene.Length	Gene.Strand	IntervalCount	Intervals	Interval.Dists.to.Start	Interval.Pos	X1_TiKD.TBXT.NEG_Brachyury_hg38..1.Present	X2_TiKD.TBXT.POS_Brachyury_hg38..1.Present	X1_TiKD.TBXT.NEG_Brachyury_hg38..1.AvgPeak	X2_TiKD.TBXT.POS_Brachyury_hg38..1.AvgPeak	MergedRegCount	Peak Value	log2FoldChange	UCSC.Link	Altsymbols	padj	RNA	Affy.Tag	PROT	...1	baseMean		lfcSE	stat	pvalue		gene_name
GeneID:1600	MSGN1	2	17,816,519	17,817,100	581	+	3	2_TiKD-TBXT-POS_Brachyury_hg38::1::11352, 2_TiKD-TBXT-POS_Brachyury_hg38::1::11353, 2_TiKD-TBXT-POS_Brachyury_hg38::1::11354	-263, 553, 5689	upstream, in gene, downstream	0	1	4.67	128.33	3	339	-8.01209	Gene MSGN1	MSOG, MSGN1	0.000419792	NM_001105569.1	-9999999	NP_001099039.1	ENSG00000151379	122.769		1.7348	-4.61845	3.86621e-06		DAB1
GeneID:23266	WISP1	8	133,191,039	133,231,690	40651	+	4	2_TiKD-TBXT-POS_Brachyury_hg38::1::22609, 2_TiKD-TBXT-POS_Brachyury_hg38::1::22610, 2_TiKD-TBXT-POS_Brachyury_hg38::1::22611, 2_TiKD-TBXT-POS_Brachyury_hg38::1::22612	-847, -255, 6785, 26273	upstream, upstream, in gene, in gene	0	1	3	84.25	4	239	-5.92314	Gene WISP1	CCN4, WISP1c, WISP1i, FLJ14388, WISP1, WISP1tc	3.63348e-06	NM_003728.3, XM_005263321.2	-9999999	NP_003719.3	ENSG00000182168	334.247		0.693027	-7.57564	3.57363e-14		ADGRL2
GeneID:79802	HOXD3	2	176,136,921	176,173,102	36181	+	19	2_TiKD-TBXT-POS_Brachyury_hg38::1::12664, 2_TiKD-TBXT-POS_Brachyury_hg38::1::12665, 2_TiKD-TBXT-POS_Brachyury_hg38::1::12666, 2_TiKD-TBXT-POS_Brachyury_hg38::1::12667, 2_TiKD-TBXT-POS_Brachyury_hg38::1::12668, 2_TiKD-TBXT-POS_Brachyury_hg38::1::12669, 2_TiKD-TBXT-POS_Brachyury_hg38::1::12670, 2_TiKD-TBXT-POS_Brachyury_hg38::1::12671, 2_TiKD-TBXT-POS_Brachyury_hg38::1::12672, 2_TiKD-TBXT-POS_Brach…	-6084, -1737, -521, 3751, 7959, 8631, 9351, 11047, 18759, 19623, 20951, 22119, 23527, 26279, 26983, 27815, 28327, 38183, 42215	upstream, upstream, upstream, in gene, in gene, in gene, in gene, in gene, in gene, in gene, in gene, in gene, in gene, in gene, in gene, in gene, in gene, downstream, downstream	0	1	4.84	48.74	19	203	-5.75675	Gene HOXD3	MGC10470, HOX1D, HOX4, Hox-4.1, HOXD3, HOX4A	0.00146043	NM_030775.2, NM_032642.2, XM_011521026.1	-9999999	NP_110402.2, NP_116031.1	ENSG00000111186	4592.17		0.228335	-3.48398	0.000494017		HHIPL2
GeneID:26509	UNC5C	4	95,162,504	95,549,210	386706	-	13	2_TiKD-TBXT-POS_Brachyury_hg38::1::16793, 2_TiKD-TBXT-POS_Brachyury_hg38::1::16794, 2_TiKD-TBXT-POS_Brachyury_hg38::1::16795, 2_TiKD-TBXT-POS_Brachyury_hg38::1::16796, 2_TiKD-TBXT-POS_Brachyury_hg38::1::16797, 2_TiKD-TBXT-POS_Brachyury_hg38::1::16798, 2_TiKD-TBXT-POS_Brachyury_hg38::1::16799, 2_TiKD-TBXT-POS_Brachyury_hg38::1::16800, 2_TiKD-TBXT-POS_Brachyury_hg38::1::16801, 2_TiKD-TBXT-POS_Brach…	387290, 386890, 367770, 339034, 186202, 185402, 116687, 15018, 4234, 1914, 1018, 186, -438	downstream, downstream, in gene, in gene, in gene, in gene, in gene, in gene, in gene, in gene, in gene, in gene, upstream	0	1	5.54	58.62	13	276	-5.25012	Gene UNC5C	UNC5C, UNC5H3	3.04598e-11	NM_003882.3, NM_080838.2, NM_001204869.1, NM_001204870.1, NR_037944.1, XM_011517358.1, XM_006716680.2, XM_011517359.1	-9999999	NP_003873.1, NP_543028.1, NP_001191798.1, NP_001191799.1	ENSG00000104415	30.3293		1.0478	-5.65294	1.57727e-08		MYOF
GeneID:256536	TBX6	16	30,085,793	30,091,937	6144	-	4	2_TiKD-TBXT-POS_Brachyury_hg38::1::8374, 2_TiKD-TBXT-POS_Brachyury_hg38::1::8375, 2_TiKD-TBXT-POS_Brachyury_hg38::1::8376, 2_TiKD-TBXT-POS_Brachyury_hg38::1::8377	5953, 553, 129, -799	in gene, in gene, in gene, upstream	0	1	10	59	4	126	-4.9267	Gene TBX6	SCDO5, DFNB67, TBX6	1.39852e-34	NM_013451.3, NM_133337.2, XM_005269693.3, XM_005269694.3, XM_011539632.1, XM_006717760.2, XM_011539633.1	-9999999	NP_038479.1, NP_579899.1	ENSG00000138119	491.036		0.307578	-7.60903	2.76163e-14		TCERG1L
GeneID:187	SNAI2	8	48,917,677	48,921,440	3763	-	1	2_TiKD-TBXT-POS_Brachyury_hg38::1::22012	-544	upstream	0	1	9	33	1	33	-4.1118	Gene SNAI2	SNAI2, SLUG, WS2D, MGC10182, SNAIL2, SLUGH1	1.00365e-31	NR_026655.1	-9999999		ENSG00000248265	145.251		0.921857	-3.81043	0.000138727		APLNR
GeneID:81029	FOXF1	16	86,510,527	86,514,464	3937	+	4	2_TiKD-TBXT-POS_Brachyury_hg38::1::8889, 2_TiKD-TBXT-POS_Brachyury_hg38::1::8890, 2_TiKD-TBXT-POS_Brachyury_hg38::1::8891, 2_TiKD-TBXT-POS_Brachyury_hg38::1::8892	-2015, -1279, -575, 5073	upstream, upstream, upstream, downstream	0	1	8.25	72.5	4	181	-3.56471	Gene FOXF1	FOXF1, FKHL5, MGC105125, ACDMPV, FREAC1	0.0269947	NM_021080.3	-9999999	NP_066566.3	ENSG00000173406	350.8		0.159003	6.06422	1.32594e-09		WNT5B
GeneID:3222	FLJ12825	12	54,058,254	54,122,234	63980	+	7	2_TiKD-TBXT-POS_Brachyury_hg38::1::5125, 2_TiKD-TBXT-POS_Brachyury_hg38::1::5126, 2_TiKD-TBXT-POS_Brachyury_hg38::1::5127, 2_TiKD-TBXT-POS_Brachyury_hg38::1::5128, 2_TiKD-TBXT-POS_Brachyury_hg38::1::5129, 2_TiKD-TBXT-POS_Brachyury_hg38::1::5130, 2_TiKD-TBXT-POS_Brachyury_hg38::1::5131	-5950, -3646, -2590, -14, 3730, 17074, 24482	upstream, upstream, upstream, upstream, in gene, in gene, in gene	0	1	5.67	64	7	226	-3.51267	Gene FLJ12825	FLJ31855	0.00757976	XM_005270668.1, XM_006710488.1, NM_012302.3, NM_001297704.1, NM_001297705.1, NM_001297706.1, XM_006710485.2, XM_011541093.1, XM_006710489.2, XM_011541094.1, XM_005270666.3, XM_006710490.2, XM_005270667.3, XM_006710491.2, XM_005270670.3, XR_946591.1, XM_01	-9999999	XP_005270725.1, XP_006710551.1, NP_036434.1, NP_001284633.1, NP_001284634.1, NP_001284635.1	ENSG00000117114	3502.43		0.141248	-5.6701	1.42718e-08		HOXC5
GeneID:440101	DLL3	19	39,498,917	39,508,481	9564	+	2	2_TiKD-TBXT-POS_Brachyury_hg38::1::10992, 2_TiKD-TBXT-POS_Brachyury_hg38::1::10993	-997, -485	upstream, upstream	0	1	10.5	58	2	86	-3.41991	Gene DLL3	DLL3, SCDO1	6.38945e-08	NM_002399.3, NM_172316.2, NM_001220482.1, NM_172315.2, NM_170674.4, NM_170675.4, NM_170676.4, NM_170677.4, NR_051953.1, XM_006720523.1, XM_006720524.1, XM_006720525.1, XM_006720522.2, XM_006720526.2, XM_006720527.2, XM_006720528.2, XM_011521591.1, XM_0067	-9999999	NP_002390.1, NP_758527.1, NP_001207411.1, NP_758526.1, NP_733774.1, NP_733775.1, NP_733777.1, NP_733776.1, XP_006720586.1, XP_006720587.1, XP_006720588.1	ENSG00000134138	85.8534		0.490235	-3.73528	0.000187503		FLJ12825
GeneID:2254	HOXA-AS3	7	27,140,364	27,155,928	15564	+	11	2_TiKD-TBXT-POS_Brachyury_hg38::1::20583, 2_TiKD-TBXT-POS_Brachyury_hg38::1::20584, 2_TiKD-TBXT-POS_Brachyury_hg38::1::20585, 2_TiKD-TBXT-POS_Brachyury_hg38::1::20586, 2_TiKD-TBXT-POS_Brachyury_hg38::1::20587, 2_TiKD-TBXT-POS_Brachyury_hg38::1::20588, 2_TiKD-TBXT-POS_Brachyury_hg38::1::20589, 2_TiKD-TBXT-POS_Brachyury_hg38::1::20590, 2_TiKD-TBXT-POS_Brachyury_hg38::1::20591, 2_TiKD-TBXT-POS_Brach…	-9340, -7180, -5804, -1516, -44, 3444, 8868, 15636, 17588, 20980, 21540	upstream, upstream, upstream, upstream, upstream, in gene, in gene, downstream, downstream, downstream, downstream	0	1	5.73	65.64	11	181	-3.30651	Gene HOXA-AS3	HOXA6as, FLJ39015, FLJ34835, FLJ34614, HOXA-AS3	0.00959368	NM_006898.4, XM_005246510.3, XM_005246509.2, XM_011511065.1, XM_005246511.2, XM_005246513.3, XM_011511066.1, XM_006712477.2	-9999999	NP_008829.3	ENSG00000128652	16.2186		1.34037	-4.29491	1.74768e-05		FGF9
GeneID:100507428	APLNR	11	57,233,577	57,237,453	3876	-	6	2_TiKD-TBXT-POS_Brachyury_hg38::1::3857, 2_TiKD-TBXT-POS_Brachyury_hg38::1::3858, 2_TiKD-TBXT-POS_Brachyury_hg38::1::3859, 2_TiKD-TBXT-POS_Brachyury_hg38::1::3860, 2_TiKD-TBXT-POS_Brachyury_hg38::1::3861, 2_TiKD-TBXT-POS_Brachyury_hg38::1::3862	7021, 6253, 3565, -179, -3443, -4947	downstream, downstream, in gene, upstream, upstream, upstream	0	1	4.67	89.17	6	177	-3.2429	Gene APLNR	FLJ90771, APJR, MGC45246, APLNR, HG11, FLJ96609, AGTRL1, APJ	0.00029504	NM_182700.5, NM_198956.3, XM_011515176.1	-9999999	NP_874359.2, NP_945194.1	ENSG00000164651	573.348		0.19953	-3.1149	0.00184009		LINC00458
GeneID:26050	TCERG1L	10	131,092,391	131,311,721	219330	-	6	2_TiKD-TBXT-POS_Brachyury_hg38::1::3442, 2_TiKD-TBXT-POS_Brachyury_hg38::1::3443, 2_TiKD-TBXT-POS_Brachyury_hg38::1::3444, 2_TiKD-TBXT-POS_Brachyury_hg38::1::3445, 2_TiKD-TBXT-POS_Brachyury_hg38::1::3446, 2_TiKD-TBXT-POS_Brachyury_hg38::1::3447	200137, 155828, 111977, 60585, -855, -2839	in gene, in gene, in gene, in gene, upstream, upstream	0	1	5.2	59.17	6	143	-2.83995	Gene TCERG1L	TCERG1L, MGC126584	0.0420946	NM_003181.3, NM_001270484.1, XM_011536080.1, XM_011536081.1	-9999999	NP_003172.1, NP_001257413.1	ENSG00000164458	1302.05		0.287357	-4.09949	4.14056e-05		SLITRK5
GeneID:84962	HOXC5	12	54,016,852	54,035,361	18509	+	12	2_TiKD-TBXT-POS_Brachyury_hg38::1::5112, 2_TiKD-TBXT-POS_Brachyury_hg38::1::5113, 2_TiKD-TBXT-POS_Brachyury_hg38::1::5114, 2_TiKD-TBXT-POS_Brachyury_hg38::1::5115, 2_TiKD-TBXT-POS_Brachyury_hg38::1::5116, 2_TiKD-TBXT-POS_Brachyury_hg38::1::5117, 2_TiKD-TBXT-POS_Brachyury_hg38::1::5118, 2_TiKD-TBXT-POS_Brachyury_hg38::1::5119, 2_TiKD-TBXT-POS_Brachyury_hg38::1::5120, 2_TiKD-TBXT-POS_Brachyury_hg38…	-5348, -1428, -36, 1153, 2092, 9452, 9964, 12092, 16812, 19340, 26636, 27276	upstream, upstream, upstream, in gene, in gene, in gene, in gene, in gene, in gene, downstream, downstream, downstream	0	1	4.25	56.83	12	154	-2.56935	Gene HOXC5	HOXC5, CP11, HOX3, HOX3D	0.00147808	NM_198321.3	-9999999	NP_938080.1	ENSG00000164574	521.24		0.275477	-4.14839	3.34826e-05		AJUBA
GeneID:64403	FGF9	13	21,671,076	21,704,501	33425	+	3	2_TiKD-TBXT-POS_Brachyury_hg38::1::5896, 2_TiKD-TBXT-POS_Brachyury_hg38::1::5897, 2_TiKD-TBXT-POS_Brachyury_hg38::1::5898	-836, -132, 4188	upstream, upstream, in gene	0	1	9.67	27.33	3	41	-2.49586	Gene FGF9	SYNS3, MGC119915, HBFG-9, FGF9, GAF, MGC119914	0.0458614	NM_001286691.1, NM_004529.3	-9999999	NP_001273620.1, NP_004520.2	ENSG00000171843	1165.61		0.374176	-3.83606	0.000125025		CDH24
GeneID:22795	PDGFRA	4	54,229,097	54,298,245	69148	+	6	2_TiKD-TBXT-POS_Brachyury_hg38::1::16513, 2_TiKD-TBXT-POS_Brachyury_hg38::1::16514, 2_TiKD-TBXT-POS_Brachyury_hg38::1::16515, 2_TiKD-TBXT-POS_Brachyury_hg38::1::16516, 2_TiKD-TBXT-POS_Brachyury_hg38::1::16517, 2_TiKD-TBXT-POS_Brachyury_hg38::1::16518	-3129, -1801, -9, 1207, 25687, 48087	upstream, upstream, upstream, in gene, in gene, in gene	0	1	8.83	84.83	6	170	-2.42211	Gene PDGFRA	CD140A, MGC74795, RHEPDGFRA, PDGFR-2, GAS9, PDGFR2, PDGFRA	1.07555e-05	NM_001451.2	-9999999	NP_001442.2	ENSG00000103241	8.97851		1.06906	-3.33444	0.000854709		NID2
GeneID:26030	ARHGAP10	4	147,732,063	148,072,779	340716	+	6	2_TiKD-TBXT-POS_Brachyury_hg38::1::17162, 2_TiKD-TBXT-POS_Brachyury_hg38::1::17163, 2_TiKD-TBXT-POS_Brachyury_hg38::1::17164, 2_TiKD-TBXT-POS_Brachyury_hg38::1::17165, 2_TiKD-TBXT-POS_Brachyury_hg38::1::17166, 2_TiKD-TBXT-POS_Brachyury_hg38::1::17167	-1503, -335, 5729, 22241, 112929, 329249	upstream, upstream, in gene, in gene, in gene, in gene	0	1	7.83	77.83	6	129	-2.40597	Gene ARHGAP10	PS-GAP, GRAF2, PSGAP, ARHGAP10, FLJ41791, FLJ20896	0.0110921	NR_038831.1, NR_038832.1	-9999999		ENSG00000254369	1072.29		0.884752	-3.73722	0.000186069		PLEKHG3
GeneID:3714	MYOF	10	93,306,429	93,482,486	176057	-	5	2_TiKD-TBXT-POS_Brachyury_hg38::1::3029, 2_TiKD-TBXT-POS_Brachyury_hg38::1::3030, 2_TiKD-TBXT-POS_Brachyury_hg38::1::3031, 2_TiKD-TBXT-POS_Brachyury_hg38::1::3032, 2_TiKD-TBXT-POS_Brachyury_hg38::1::3033	56118, 47158, 46358, 11222, -138	in gene, in gene, in gene, in gene, upstream	0	1	6.2	76.8	5	235	-2.34037	Gene MYOF	FLJ90777, FER1L3, FLJ36571, MYOF	2.47776e-11	NM_005161.4, NR_027991.1	-9999999	NP_005152.1	ENSG00000134817	5698.78		0.689715	-4.7018	2.57881e-06		JAG2
GeneID:4212	HOXA2	7	27,100,354	27,102,775	2421	-	12	2_TiKD-TBXT-POS_Brachyury_hg38::1::20562, 2_TiKD-TBXT-POS_Brachyury_hg38::1::20563, 2_TiKD-TBXT-POS_Brachyury_hg38::1::20564, 2_TiKD-TBXT-POS_Brachyury_hg38::1::20565, 2_TiKD-TBXT-POS_Brachyury_hg38::1::20566, 2_TiKD-TBXT-POS_Brachyury_hg38::1::20567, 2_TiKD-TBXT-POS_Brachyury_hg38::1::20568, 2_TiKD-TBXT-POS_Brachyury_hg38::1::20569, 2_TiKD-TBXT-POS_Brachyury_hg38::1::20570, 2_TiKD-TBXT-POS_Brach…	11479, 10583, 7831, 6551, 5399, 3351, 791, -297, -3758, -6057, -8041, -9065	downstream, downstream, downstream, downstream, downstream, downstream, in gene, upstream, upstream, upstream, upstream, upstream	0	1	7.42	62.25	12	173	-2.32141	Gene HOXA2	HOXA2, HOX1K, MCOHI	2.37007e-06	NM_006735.3	-9999999	NP_006726.1	ENSG00000105996	67.8603		0.404233	-5.74275	9.31512e-09		MEIS2
GeneID:5873	HAS2	8	121,612,116	121,641,390	29274	-	5	2_TiKD-TBXT-POS_Brachyury_hg38::1::22494, 2_TiKD-TBXT-POS_Brachyury_hg38::1::22495, 2_TiKD-TBXT-POS_Brachyury_hg38::1::22496, 2_TiKD-TBXT-POS_Brachyury_hg38::1::22497, 2_TiKD-TBXT-POS_Brachyury_hg38::1::22498	18062, 1678, -370, -946, -1810	in gene, in gene, upstream, upstream, upstream	0	1	5.4	54.6	5	90	-2.13513	Gene HAS2	MGC126242, MGC126241, HAS2	4.73267e-06	NM_153620.2, NM_005522.4	-9999999	NP_705873.2, NP_005513.1	ENSG00000105991	1492		0.149242	-5.58023	2.40199e-08		RAB27A
GeneID:7090	MSX1	4	4,859,665	4,863,936	4271	+	7	2_TiKD-TBXT-POS_Brachyury_hg38::1::16214, 2_TiKD-TBXT-POS_Brachyury_hg38::1::16215, 2_TiKD-TBXT-POS_Brachyury_hg38::1::16216, 2_TiKD-TBXT-POS_Brachyury_hg38::1::16217, 2_TiKD-TBXT-POS_Brachyury_hg38::1::16218, 2_TiKD-TBXT-POS_Brachyury_hg38::1::16219, 2_TiKD-TBXT-POS_Brachyury_hg38::1::16220	-4817, -3793, -2801, -1393, -225, 4623, 6799	upstream, upstream, upstream, upstream, upstream, downstream, downstream	0	1	5	39.29	7	70	-2.01305	Gene MSX1	ECTD3, HYD1, HOX7, STHAG1, MSX1	7.57641e-06	NM_006206.4, XM_005265743.1, XM_006714039.2, XM_011534385.1, XM_011534386.1, XM_006714041.2	-9999999	NP_006197.1, XP_005265800.1	ENSG00000134853	164.306		0.447426	-5.41342	6.18316e-08		TLE3
GeneID:64285	MEIS2	15	36,891,021	37,101,334	210313	-	20	2_TiKD-TBXT-POS_Brachyury_hg38::1::7385, 2_TiKD-TBXT-POS_Brachyury_hg38::1::7386, 2_TiKD-TBXT-POS_Brachyury_hg38::1::7387, 2_TiKD-TBXT-POS_Brachyury_hg38::1::7388, 2_TiKD-TBXT-POS_Brachyury_hg38::1::7389, 2_TiKD-TBXT-POS_Brachyury_hg38::1::7390, 2_TiKD-TBXT-POS_Brachyury_hg38::1::7391, 2_TiKD-TBXT-POS_Brachyury_hg38::1::7392, 2_TiKD-TBXT-POS_Brachyury_hg38::1::7393, 2_TiKD-TBXT-POS_Brachyury_hg38…	213782, 212481, 204214, 203334, 202582, 194038, 188598, 186454, 185718, 183574, 175462, 69046, 68182, 55574, 45654, 982, -234, -1098, -3242, -9290	downstream, downstream, in gene, in gene, in gene, in gene, in gene, in gene, in gene, in gene, in gene, in gene, in gene, in gene, in gene, in gene, upstream, upstream, upstream, upstream	0	1	7.1	62.15	20	206	-1.83117	Gene MEIS2	MRG1, HsT18361, MEIS2, MGC2820	0.0095987	NM_018953.3, NR_003084.2	-9999999	NP_061826.1	ENSG00000172789	101.586		0.598907	-4.29007	1.78615e-05		RHBDF1
GeneID:6911	CHST2	3	143,119,776	143,124,014	4238	+	2	2_TiKD-TBXT-POS_Brachyury_hg38::1::15690, 2_TiKD-TBXT-POS_Brachyury_hg38::1::15691	-2512, -608	upstream, upstream	0	1	5.5	32	2	44	-1.66723	Gene CHST2	GST2, GST-2, C6ST, Gn6ST-1, HEL-S-75, CHST2	2.14672e-09	NM_004655.3, XM_011525319.1, XM_011525320.1, XM_011525321.1, XM_011525322.1	-9999999	NP_004646.3	ENSG00000168646	2377.52		0.139632	-4.38426	1.16382e-05		TBX6
GeneID:27324	HHIPL2	1	222,522,260	222,548,102	25842	-	2	2_TiKD-TBXT-POS_Brachyury_hg38::1::2063, 2_TiKD-TBXT-POS_Brachyury_hg38::1::2064	1302, -250	in gene, upstream	0	1	3	89	2	98	-1.64777	Gene HHIPL2	KIAA1822L, FLJ13840, HHIPL2	0.0013179	NM_174937.3, XM_011539577.1, XM_011539578.1	-9999999	NP_777597.2	ENSG00000176769	340.35		0.894501	-3.1749	0.00149888		TOX3
GeneID:2294	SERPINE2	2	223,975,048	224,039,319	64271	-	3	2_TiKD-TBXT-POS_Brachyury_hg38::1::13104, 2_TiKD-TBXT-POS_Brachyury_hg38::1::13105, 2_TiKD-TBXT-POS_Brachyury_hg38::1::13106	13175, 12135, -425	in gene, in gene, upstream	0	1	8	39	3	74	-1.64099	Gene SERPINE2	GDNPF, DKFZp686A13110, PNI, GDN, SERPINE2, PI7, PN1, PI-7, PN-1	1.12744e-10	NM_024605.3, XM_005263215.2, XM_011532243.1, XM_011532244.1, XM_005263217.2	-9999999	NP_078881.3	ENSG00000071205	94.1014		0.653614	-3.68103	0.000232292		FOXF1
GeneID:5187	SLITRK5	13	87,671,232	87,679,616	8384	+	3	2_TiKD-TBXT-POS_Brachyury_hg38::1::6361, 2_TiKD-TBXT-POS_Brachyury_hg38::1::6362, 2_TiKD-TBXT-POS_Brachyury_hg38::1::6363	-128, 992, 3424	upstream, in gene, in gene	0	1	10.33	30.67	3	43	-1.63161	Gene SLITRK5	bA364G4.2, SLITRK5, LRRC11, FLJ58374, KIAA0918	8.66731e-30	NM_004608.3, XM_005255523.1, XM_011545926.1, XR_950840.1	-9999999	NP_004599.2, XP_005255580.1	ENSG00000149922	587.293		0.381196	-12.9243	3.28156e-38		PER1
GeneID:3215	RHBDF1	16	58,059	76,355	18296	-	3	2_TiKD-TBXT-POS_Brachyury_hg38::1::8092, 2_TiKD-TBXT-POS_Brachyury_hg38::1::8093, 2_TiKD-TBXT-POS_Brachyury_hg38::1::8094	1635, 195, -493	in gene, in gene, upstream	0	1	6.33	61.67	3	124	-1.48246	Gene RHBDF1	gene-89, RHBDF1, Dist1, hDist1, FLJ22357, C16orf8, gene-90, EGFR-RS, FLJ2235	0.000114512	NM_022450.3, XM_005255494.1, XM_006720921.1, XM_005255498.2, XM_011522598.1, XM_011522599.1, XM_011522600.1	-9999999	NP_071895.3, XP_005255551.1, XP_006720984.1, XP_005255555.1	ENSG00000007384	507.738		0.301786	-4.9123	9.00135e-07		HOXB5
GeneID:8313	MLLT3	9	20,341,665	20,622,543	280878	-	8	2_TiKD-TBXT-POS_Brachyury_hg38::1::22878, 2_TiKD-TBXT-POS_Brachyury_hg38::1::22879, 2_TiKD-TBXT-POS_Brachyury_hg38::1::22880, 2_TiKD-TBXT-POS_Brachyury_hg38::1::22881, 2_TiKD-TBXT-POS_Brachyury_hg38::1::22882, 2_TiKD-TBXT-POS_Brachyury_hg38::1::22883, 2_TiKD-TBXT-POS_Brachyury_hg38::1::22884, 2_TiKD-TBXT-POS_Brachyury_hg38::1::22885	265807, 259151, 243471, 213871, 20751, 18927, 335, -273	in gene, in gene, in gene, in gene, in gene, in gene, in gene, upstream	0	1	5	63.63	8	182	-1.43536	Gene MLLT3	AF9, MLLT3, YEATS3, FLJ2035	0.00696506	XM_005254633.1, NM_001105192.2, NM_005078.3, NM_020908.2, NM_001282979.1, NM_001282980.1, NM_001282981.1, NM_001282982.1, XM_011521976.1, XM_011521977.1, XM_005254622.3, XM_011521978.1, XM_005254623.2, XM_011521979.1, XM_011521980.1, XM_005254625.2, XM_01	-9999999	XP_005254690.1, NP_001098662.1, NP_005069.2, NP_065959.1, NP_001269908.1, NP_001269909.1, NP_001269910.1, NP_001269911.1	ENSG00000140332	2453.63		0.172553	-4.12152	3.76378e-05		AXIN2
GeneID:10975	CDH24	14	23,047,061	23,057,619	10558	-	1	2_TiKD-TBXT-POS_Brachyury_hg38::1::6624	-493	upstream	0	1	22	27	1	27	-1.38052	Gene CDH24	MGC131880, FLJ25193, CDH11L, CDH24	0.000139373	NM_015541.2, XM_011533578.1, XM_011533579.1	-9999999	NP_056356.2	ENSG00000144749	2862.04		0.216182	3.71014	0.000207142		UQCR11
GeneID:10683	LINC00458	13	54,124,324	54,132,871	8547	-	2	2_TiKD-TBXT-POS_Brachyury_hg38::1::6180, 2_TiKD-TBXT-POS_Brachyury_hg38::1::6181	519, -153	in gene, upstream	0	1	4	33.5	2	36	-1.33738	Gene LINC00458	LINC00458, LncRNA-ES3, RP11-168P6.1	2.15796e-05	NM_024746.3, XM_011509985.1, XM_011509986.1, XR_921936.1	-9999999	NP_079022.2	ENSG00000143512	207.602		0.380896	-4.32605	1.51808e-05		DLL3
GeneID:343930	HOXB5	17	48,591,257	48,593,741	2484	-	4	2_TiKD-TBXT-POS_Brachyury_hg38::1::9508, 2_TiKD-TBXT-POS_Brachyury_hg38::1::9509, 2_TiKD-TBXT-POS_Brachyury_hg38::1::9510, 2_TiKD-TBXT-POS_Brachyury_hg38::1::9511	4077, 3469, -275, -2323	downstream, downstream, upstream, upstream	0	1	6.25	42.75	4	82	-1.29947	Gene HOXB5	HOXB5, HOX2, Hox2.1, HOX2A, HU-1, HHO.C10	0.020088	NM_005328.2, XM_011517000.1, XM_011517001.1, XM_011517002.1, XM_011517003.1	-9999999	NP_005319.1	ENSG00000170961	528.665		0.381633	-5.59472	2.20977e-08		MSGN1
GeneID:3232	RAB27A	15	55,202,966	55,289,828	86862	-	2	2_TiKD-TBXT-POS_Brachyury_hg38::1::7519, 2_TiKD-TBXT-POS_Brachyury_hg38::1::7520	71652, -860	in gene, upstream	0	1	6.5	21	2	22	-1.21783	Gene RAB27A	RAB27, RAB27A, GS2, HsT18676, RAM, MGC117246	0.000415125	NM_015549.1, XM_011536624.1, XM_011536625.1, XM_011536626.1, XM_011536627.1, XM_011536628.1, XM_011536629.1, XM_005267513.2	-9999999	NP_056364.1	ENSG00000126822	1908.96		0.310384	-3.63327	0.000279851		HOXD3
GeneID:5270	TBXT	6	166,157,656	166,168,669	11013	-	5	2_TiKD-TBXT-POS_Brachyury_hg38::1::20259, 2_TiKD-TBXT-POS_Brachyury_hg38::1::20260, 2_TiKD-TBXT-POS_Brachyury_hg38::1::20261, 2_TiKD-TBXT-POS_Brachyury_hg38::1::20262, 2_TiKD-TBXT-POS_Brachyury_hg38::1::20263	-259, -899, -1539, -3523, -4675	upstream, upstream, upstream, upstream, upstream	0	1	5.8	65.4	5	184	-1.17802	Gene T	MGC104817, T, TFT, SAVA	0.00288099	NM_203486.2, NM_016941.3	-9999999	NP_982353.1, NP_058637.1	ENSG00000090932	1470.27		0.531521	-6.4342	1.24129e-10		SERPINE2
GeneID:5933	RASL11B	4	52,862,328	52,866,835	4507	+	3	2_TiKD-TBXT-POS_Brachyury_hg38::1::16502, 2_TiKD-TBXT-POS_Brachyury_hg38::1::16503, 2_TiKD-TBXT-POS_Brachyury_hg38::1::16504	-792, 664, 1192	upstream, in gene, in gene	0	1	6.67	36	3	62	-1.16118	Gene RASL11B	RASL11B, MGC4499, MGC2827	9.51737e-10	NM_001080430.2, NM_001146188.1, XM_005255892.2, XM_005255893.2, XM_011523002.1	-9999999	NP_001073899.2, NP_001139660.1	ENSG00000103460	197.417		0.230622	3.69556	0.000219406		RBL1
GeneID:1849	GALNT10	5	154,190,735	154,420,984	230249	+	9	2_TiKD-TBXT-POS_Brachyury_hg38::1::18578, 2_TiKD-TBXT-POS_Brachyury_hg38::1::18579, 2_TiKD-TBXT-POS_Brachyury_hg38::1::18580, 2_TiKD-TBXT-POS_Brachyury_hg38::1::18581, 2_TiKD-TBXT-POS_Brachyury_hg38::1::18582, 2_TiKD-TBXT-POS_Brachyury_hg38::1::18583, 2_TiKD-TBXT-POS_Brachyury_hg38::1::18584, 2_TiKD-TBXT-POS_Brachyury_hg38::1::18585, 2_TiKD-TBXT-POS_Brachyury_hg38::1::18586	-591, 45905, 70353, 111553, 177489, 187521, 217521, 218273, 226305	upstream, in gene, in gene, in gene, in gene, in gene, in gene, in gene, in gene	0	1	3.44	55.89	9	183	-1.14278	Gene GALNT10	GALNACT10, pp-GalNAc-T10, GalNAcT10, PPGANTASE10, FLJ11715, DKFZp586H0623, GALNT10, FLJ00205, PPGALNACT10	0.00249248	NM_002147.3	-9999999	NP_002138.1	ENSG00000120075	98.759		0.375887	-3.45707	0.000546082		DUSP7
GeneID:26018	PLEKHG3	14	64,704,413	64,746,905	42492	+	12	2_TiKD-TBXT-POS_Brachyury_hg38::1::6911, 2_TiKD-TBXT-POS_Brachyury_hg38::1::6912, 2_TiKD-TBXT-POS_Brachyury_hg38::1::6913, 2_TiKD-TBXT-POS_Brachyury_hg38::1::6914, 2_TiKD-TBXT-POS_Brachyury_hg38::1::6915, 2_TiKD-TBXT-POS_Brachyury_hg38::1::6916, 2_TiKD-TBXT-POS_Brachyury_hg38::1::6917, 2_TiKD-TBXT-POS_Brachyury_hg38::1::6918, 2_TiKD-TBXT-POS_Brachyury_hg38::1::6919, 2_TiKD-TBXT-POS_Brachyury_hg38…	-7741, -6141, -5357, -1181, -125, 2691, 3347, 3907, 11203, 17283, 19843, 21091	upstream, upstream, upstream, upstream, upstream, in gene, in gene, in gene, in gene, in gene, in gene, in gene	0	1	8.08	47.92	12	87	-1.12771	Gene PLEKHG3	MGC156300, KIAA0599, ARHGEF43, PLEKHG3, MGC156299	0.0125874	NM_006216.3, NM_001136528.1, NM_001136530.1, NR_073116.1, XM_005246641.2, XM_005246642.2	-9999999	NP_006207.1, NP_001130000.1, NP_001130002.1	ENSG00000135919	1949.4		0.22202	-7.39121	1.45501e-13		LRIG1
GeneID:10274	AJUBA	14	22,971,174	22,982,642	11468	-	1	2_TiKD-TBXT-POS_Brachyury_hg38::1::6620	-142	upstream	0	1	11	46	1	46	-1.11023	Gene AJUBA	Ajuba, MGC15563, JUB, AJUBA	0.0142507	NM_002448.3	-9999999	NP_002439.2	ENSG00000163132	831.022		0.367226	-5.48179	4.21052e-08		STAG1
GeneID:9435	PER1	17	8,140,470	8,156,405	15935	-	4	2_TiKD-TBXT-POS_Brachyury_hg38::1::9036, 2_TiKD-TBXT-POS_Brachyury_hg38::1::9037, 2_TiKD-TBXT-POS_Brachyury_hg38::1::9038, 2_TiKD-TBXT-POS_Brachyury_hg38::1::9039	22821, 17493, -43, -8011	downstream, downstream, upstream, upstream	0	1	10	40	4	64	-1.08217	Gene PER1	hPER, PER1, RIGUI, PER, MGC88021	0.00157784	NM_007124.2, XM_005267130.1, XM_005267133.1, XM_011536101.1, XM_011536102.1, XM_011536103.1, XM_011536104.1, XM_011536105.1, XM_005267127.3, XM_011536106.1, XM_011536107.1, XM_011536108.1, XM_011536109.1, XM_006715560.2	-9999999	NP_009055.2, XP_005267187.1, XP_005267190.1	ENSG00000152818	1574.15		0.195825	4.46352	8.06247e-06		CHST2
GeneID:5912	NID2	14	52,004,802	52,069,231	64429	-	2	2_TiKD-TBXT-POS_Brachyury_hg38::1::6793, 2_TiKD-TBXT-POS_Brachyury_hg38::1::6794	23471, -289	in gene, upstream	0	1	9	40.5	2	59	-1.05726	Gene NID2	NID2	0.00906649	NM_002616.2, XM_005256689.1, XM_005256690.1	-9999999	NP_002607.2, XP_005256746.1, XP_005256747.1	ENSG00000179094	709.732		0.25328	-4.27261	1.93197e-05		RAP2B
GeneID:4487	UQCR11	19	1,597,155	1,605,484	8329	-	1	2_TiKD-TBXT-POS_Brachyury_hg38::1::10709	-660	upstream	0	1	8	25	1	25	-1.02923	Gene UQCR11	UQCR, QCR10, 0710008D09Rik, UQCR11	6.63893e-08	NM_001804.2	-9999999	NP_001795.2	ENSG00000113722	1604.62		0.241891	-3.8986	9.67489e-05		MSX1
GeneID:65997	KHDRBS3	8	135,457,461	135,656,516	199055	+	1	2_TiKD-TBXT-POS_Brachyury_hg38::1::22653	-693	upstream	0	1	7	55	1	55	-0.960882	Gene KHDRBS3	KHDRBS3, etoile, TSTAR, SLM2, Etle, SALP, T-STAR, SLM-2	0.0148154	NM_023940.2	-9999999	NP_076429.1	ENSG00000128045	759.862		0.16403	-7.07904	1.45158e-12		RASL11B
GeneID:5156	CDX1	5	150,166,781	150,184,558	17777	+	9	2_TiKD-TBXT-POS_Brachyury_hg38::1::18500, 2_TiKD-TBXT-POS_Brachyury_hg38::1::18501, 2_TiKD-TBXT-POS_Brachyury_hg38::1::18502, 2_TiKD-TBXT-POS_Brachyury_hg38::1::18503, 2_TiKD-TBXT-POS_Brachyury_hg38::1::18504, 2_TiKD-TBXT-POS_Brachyury_hg38::1::18505, 2_TiKD-TBXT-POS_Brachyury_hg38::1::18506, 2_TiKD-TBXT-POS_Brachyury_hg38::1::18507, 2_TiKD-TBXT-POS_Brachyury_hg38::1::18508	-8381, -4477, -2877, -189, 1347, 5923, 19075, 19619, 21475	upstream, upstream, upstream, upstream, in gene, in gene, downstream, downstream, downstream	0	1	3.22	42.89	9	64	-0.943038	Gene CDX1	MGC116915, CDX1	0.00576303	NM_007361.3, XM_005267405.3, XM_005267406.3, XM_005267407.3	-9999999	NP_031387.3	ENSG00000087303	609.397		0.281393	-3.75725	0.000171788		PDGFRA
GeneID:23001	SDC2	8	96,493,351	96,611,809	118458	+	3	2_TiKD-TBXT-POS_Brachyury_hg38::1::22288, 2_TiKD-TBXT-POS_Brachyury_hg38::1::22289, 2_TiKD-TBXT-POS_Brachyury_hg38::1::22290	-327, 153, 1881	upstream, in gene, in gene	0	1	8.67	33	3	45	-0.938214	Gene SDC2	SDC2, HSPG, HSPG1, CD362, SYND2	0.00153829	XM_005250757.1, NM_006558.2, XR_242372.2, XM_011516796.1, XM_011516797.1, XM_011516798.1, XR_928287.1, XM_005250758.2, XR_242374.2, XM_011516799.1	-9999999	XP_005250814.1, NP_006549.1	ENSG00000131773	718.397		0.269022	-3.57176	0.000354589		WDFY3
GeneID:8633	HMGB2	4	173,331,376	173,334,444	3068	-	1	2_TiKD-TBXT-POS_Brachyury_hg38::1::17316	-676	upstream	0	1	12	33	1	33	-0.914767	Gene HMGB2	HMGB2, HMG2	3.60942e-05	NM_019035.4, NM_001300828.1, XM_006714239.2	-9999999	NP_061908.1, NP_001287757.1	ENSG00000189184	1778.16		0.240632	3.97645	6.99521e-05		UNC5C
GeneID:54510	HOXA1	7	27,092,993	27,096,006	3013	-	8	2_TiKD-TBXT-POS_Brachyury_hg38::1::20562, 2_TiKD-TBXT-POS_Brachyury_hg38::1::20563, 2_TiKD-TBXT-POS_Brachyury_hg38::1::20564, 2_TiKD-TBXT-POS_Brachyury_hg38::1::20565, 2_TiKD-TBXT-POS_Brachyury_hg38::1::20566, 2_TiKD-TBXT-POS_Brachyury_hg38::1::20567, 2_TiKD-TBXT-POS_Brachyury_hg38::1::20568, 2_TiKD-TBXT-POS_Brachyury_hg38::1::20569	4710, 3814, 1062, -218, -1370, -3418, -5978, -7066	downstream, downstream, in gene, upstream, upstream, upstream, upstream, upstream	0	1	7.63	72.38	8	173	-0.832803	Gene HOXA1	HOX1F, HOXA1, MGC45232, HOX1, BSAS	4.99351e-06	NM_032876.5, NM_198086.2, NM_001289097.1	-9999999	NP_116265.1, NP_932352.1, NP_001276026.1	ENSG00000129474	1335.5		0.309563	-3.58644	0.000335222		PCDH18
GeneID:79658	ADGRL2	1	81,306,199	81,992,738	686539	+	15	2_TiKD-TBXT-POS_Brachyury_hg38::1::946, 2_TiKD-TBXT-POS_Brachyury_hg38::1::947, 2_TiKD-TBXT-POS_Brachyury_hg38::1::948, 2_TiKD-TBXT-POS_Brachyury_hg38::1::949, 2_TiKD-TBXT-POS_Brachyury_hg38::1::950, 2_TiKD-TBXT-POS_Brachyury_hg38::1::951, 2_TiKD-TBXT-POS_Brachyury_hg38::1::952, 2_TiKD-TBXT-POS_Brachyury_hg38::1::953, 2_TiKD-TBXT-POS_Brachyury_hg38::1::954, 2_TiKD-TBXT-POS_Brachyury_hg38::1::955,…	-855, 2025, 106841, 146761, 172233, 207732, 313177, 354249, 357545, 368361, 494217, 495113, 497481, 498185, 499817	upstream, in gene, in gene, in gene, in gene, in gene, in gene, in gene, in gene, in gene, in gene, in gene, in gene, in gene, in gene	0	1	5.8	52.67	15	209	-0.800887	Gene ADGRL2	LPHN2, CL2, LPHH1, CIRL2, LEC1, ADGRL2	3.33275e-06	NM_002998.3, XM_005251020.2, XM_006716614.2, XM_011517211.1, XM_005251019.3, XM_011517212.1	-9999999	NP_002989.2, XP_005251077.1	ENSG00000169439	928.834		0.219203	-4.28012	1.86793e-05		ARHGAP10
GeneID:3148	DUSP7	3	52,048,919	52,056,445	7526	-	1	2_TiKD-TBXT-POS_Brachyury_hg38::1::14964	-547	upstream	0	1	9	24	1	24	-0.798399	Gene DUSP7	DKFZp586F2224, PYST2, MKPX, DUSP7	0.00312061	NM_001278613.1, NM_001278615.1, NM_032420.3, NM_002587.4, XM_005268452.2, XM_005268453.3, XM_005268454.3, XM_005268455.2	-9999999	NP_001265542.1, NP_001265544.1, NP_115796.2, NP_002578.2	ENSG00000156453	2873.23		0.252752	4.4603	8.18443e-06		HMGB2
GeneID:5097	WNT5B	12	1,529,891	1,647,213	117322	+	10	2_TiKD-TBXT-POS_Brachyury_hg38::1::4695, 2_TiKD-TBXT-POS_Brachyury_hg38::1::4696, 2_TiKD-TBXT-POS_Brachyury_hg38::1::4697, 2_TiKD-TBXT-POS_Brachyury_hg38::1::4698, 2_TiKD-TBXT-POS_Brachyury_hg38::1::4699, 2_TiKD-TBXT-POS_Brachyury_hg38::1::4700, 2_TiKD-TBXT-POS_Brachyury_hg38::1::4701, 2_TiKD-TBXT-POS_Brachyury_hg38::1::4702, 2_TiKD-TBXT-POS_Brachyury_hg38::1::4703, 2_TiKD-TBXT-POS_Brachyury_hg38…	-931, 7666, 60317, 60797, 65149, 82381, 100013, 103677, 104893, 112781	upstream, in gene, in gene, in gene, in gene, in gene, in gene, in gene, in gene, in gene	0	1	6	78.7	10	270	-0.795515	Gene WNT5B	MGC2648, WNT5B	0.0187145	NM_004267.4	-9999999	NP_004258.2	ENSG00000175040	315.903		0.239541	-6.96011	3.40009e-12		PCDH1
GeneID:1044	TLE3	15	70,047,790	70,097,935	50145	-	4	2_TiKD-TBXT-POS_Brachyury_hg38::1::7720, 2_TiKD-TBXT-POS_Brachyury_hg38::1::7721, 2_TiKD-TBXT-POS_Brachyury_hg38::1::7722, 2_TiKD-TBXT-POS_Brachyury_hg38::1::7723	8831, -529, -1841, -3665	in gene, upstream, upstream, upstream	0	1	10.25	87.75	4	113	-0.711182	Gene TLE3	KIAA1547, ESG, GRG3, FLJ39460, HsT18976, TLE3, ESG3	0.00270722	NM_015567.1, XM_005254039.1, XM_005254038.3	-9999999	NP_056382.1, XP_005254096.1	ENSG00000165300	1058.44		0.135825	-12.0126	3.05062e-33		CDX1
GeneID:55568	RAP2B	3	153,162,212	153,170,624	8412	+	2	2_TiKD-TBXT-POS_Brachyury_hg38::1::15754, 2_TiKD-TBXT-POS_Brachyury_hg38::1::15755	-596, 4268	upstream, in gene	0	1	6	23.5	2	30	-0.652703	Gene RAP2B	RAP2B, MGC20484	0.0263916	NM_002010.2, XM_011534996.1	-9999999	NP_002001.1	ENSG00000102678	47.6243		0.795364	-3.138	0.00170102		GALNT10
GeneID:7402	SP8	7	20,781,467	20,786,889	5422	-	8	2_TiKD-TBXT-POS_Brachyury_hg38::1::20467, 2_TiKD-TBXT-POS_Brachyury_hg38::1::20468, 2_TiKD-TBXT-POS_Brachyury_hg38::1::20469, 2_TiKD-TBXT-POS_Brachyury_hg38::1::20470, 2_TiKD-TBXT-POS_Brachyury_hg38::1::20471, 2_TiKD-TBXT-POS_Brachyury_hg38::1::20472, 2_TiKD-TBXT-POS_Brachyury_hg38::1::20473, 2_TiKD-TBXT-POS_Brachyury_hg38::1::20474	10345, 5225, 105, -279, -1975, -3735, -4279, -4615	downstream, in gene, in gene, upstream, upstream, upstream, upstream, upstream	0	1	8.63	60	8	195	-0.621514	Gene SP8	BTD, SP8	0.0486327	NM_183404.2, NM_002895.3, XM_006723842.1, XM_011528955.1, XM_011528956.1, XM_011528957.1, XM_011528958.1, XM_011528959.1	-9999999	NP_899662.1, NP_002886.2, XP_006723905.1	ENSG00000080839	399.526		0.149923	4.03138	5.545e-05		UTRN
GeneID:9590	AXIN2	17	65,528,563	65,561,622	33059	-	10	2_TiKD-TBXT-POS_Brachyury_hg38::1::9743, 2_TiKD-TBXT-POS_Brachyury_hg38::1::9744, 2_TiKD-TBXT-POS_Brachyury_hg38::1::9745, 2_TiKD-TBXT-POS_Brachyury_hg38::1::9746, 2_TiKD-TBXT-POS_Brachyury_hg38::1::9747, 2_TiKD-TBXT-POS_Brachyury_hg38::1::9748, 2_TiKD-TBXT-POS_Brachyury_hg38::1::9749, 2_TiKD-TBXT-POS_Brachyury_hg38::1::9750, 2_TiKD-TBXT-POS_Brachyury_hg38::1::9751, 2_TiKD-TBXT-POS_Brachyury_hg38…	41878, 37398, 30134, 11126, 7478, 4966, 2550, 1078, -586, -6826	downstream, downstream, in gene, in gene, in gene, in gene, in gene, in gene, upstream, upstream	0	1	5.3	55.2	10	152	-0.612181	Gene AXIN2	MGC10366, ODCRCS, AXIL, AXIN2, DKFZp781B0869, MGC126582	0.00104972	NR_108062.1, NR_108063.1	-9999999		ENSG00000234787	646.392		0.253874	-5.26791	1.37982e-07		AKAP12
GeneID:6862	AKAP12	6	151,239,999	151,358,559	118560	+	2	2_TiKD-TBXT-POS_Brachyury_hg38::1::20141, 2_TiKD-TBXT-POS_Brachyury_hg38::1::20142	-271, 54529	upstream, in gene	0	1	3.5	28	2	33	-0.58864	Gene AKAP12	DKFZp686O0331, DKFZp686M0430, FLJ97621, FLJ20945, SSeCKS, AKAP250, AKAP12	0.0179023	NM_005862.2, XM_011512329.1, XM_011512330.1, XM_011512331.1, XM_011512332.1, XM_011512333.1	-9999999	NP_005853.2	ENSG00000118007	880.359		0.167876	-3.26178	0.00110714		T
GeneID:221833	STAG1	3	136,336,234	136,752,403	416169	-	3	2_TiKD-TBXT-POS_Brachyury_hg38::1::15630, 2_TiKD-TBXT-POS_Brachyury_hg38::1::15631, 2_TiKD-TBXT-POS_Brachyury_hg38::1::15632	398611, 947, -109	in gene, in gene, upstream	0	1	9.33	29.67	3	36	-0.547575	Gene STAG1	SA1, DKFZp781D1416, STAG1, SCC3A	0.0329956	NM_003068.4	-9999999	NP_003059.1	ENSG00000019549	410.54		0.331852	-12.3905	2.94378e-35		SP8
GeneID:3198	AP1S2	X	15,825,806	15,855,014	29208	-	2	2_TiKD-TBXT-POS_Brachyury_hg38::1::23806, 2_TiKD-TBXT-POS_Brachyury_hg38::1::23807	27526, -10	in gene, upstream	0	1	13.5	28	2	29	-0.508993	Gene AP1S2	MRXS21, MRXSF, SIGMA1B, DC22, MRX59, MGC:1902, AP1S2, MRXS5, PGS	0.0296489	NM_002129.3, NM_001130688.1, NM_001130689.1	-9999999	NP_002120.1, NP_001124160.1, NP_001124161.1	ENSG00000164104	5383.78		0.177301	-5.15941	2.47728e-07		HOXA1
GeneID:3199	RBL1	20	36,996,349	37,096,000	99651	-	1	2_TiKD-TBXT-POS_Brachyury_hg38::1::13565	-112	upstream	0	1	16	38	1	38	0.604395	Gene RBL1	RBL1, PRB1, MGC40006, p107, CP107	0.00359413	NM_144497.2, NM_005100.3, XM_005267233.1, XM_005267235.1	-9999999	NP_653080.1, NP_005091.2, XP_005267290.1, XP_005267292.1	ENSG00000131016	3517.61		0.167978	-3.50426	0.000457876		HOXA2
GeneID:100133311	WDFY3	4	84,669,537	84,966,391	296854	-	2	2_TiKD-TBXT-POS_Brachyury_hg38::1::16711, 2_TiKD-TBXT-POS_Brachyury_hg38::1::16712	95847, -297	in gene, upstream	0	1	13.5	26	2	27	0.630462	Gene WDFY3	ALFY, MGC16461, ZFYVE25, WDFY3, KIAA0993	0.0252764	NM_002886.3	-9999999	NP_002877.2	ENSG00000181467	902.299		0.195204	-3.34369	0.000826721		HOXA-AS3
GeneID:6591	LRIG1	3	66,378,797	66,501,263	122466	-	10	2_TiKD-TBXT-POS_Brachyury_hg38::1::15145, 2_TiKD-TBXT-POS_Brachyury_hg38::1::15146, 2_TiKD-TBXT-POS_Brachyury_hg38::1::15147, 2_TiKD-TBXT-POS_Brachyury_hg38::1::15148, 2_TiKD-TBXT-POS_Brachyury_hg38::1::15149, 2_TiKD-TBXT-POS_Brachyury_hg38::1::15150, 2_TiKD-TBXT-POS_Brachyury_hg38::1::15151, 2_TiKD-TBXT-POS_Brachyury_hg38::1::15152, 2_TiKD-TBXT-POS_Brachyury_hg38::1::15153, 2_TiKD-TBXT-POS_Brach…	85455, 36687, 36367, 30671, 29946, 25439, 22159, 13727, 6927, -49	in gene, in gene, in gene, in gene, in gene, in gene, in gene, in gene, in gene, upstream	0	1	6	41.3	10	109	0.802066	Gene LRIG1	DKFZp586O1624, LIG-1, LIG1, LRIG1	0.0102949	NM_003916.4, NM_001272071.1, XR_247289.2, XM_011545599.1, XM_005274614.3, XR_247290.3	-9999999	NP_003907.3, NP_001259000.1	ENSG00000182287	4162.89		0.154195	-3.30096	0.000963541		SNAI2
GeneID:6383	JAG2	14	105,140,981	105,168,824	27843	-	1	2_TiKD-TBXT-POS_Brachyury_hg38::1::7312	-371	upstream	0	1	11	17	1	17	0.844555	Gene JAG2	HJ2, SER2, JAG2	0.0060993	NM_022478.3, NM_144985.3, XM_011537088.1, XM_011537089.1, XM_011537090.1	-9999999	NP_071923.2, NP_659422.2	ENSG00000139880	1250.57		0.283601	-4.86784	1.12826e-06		SDC2
GeneID:3037	TOX3	16	52,436,425	52,547,802	111377	-	2	2_TiKD-TBXT-POS_Brachyury_hg38::1::8493, 2_TiKD-TBXT-POS_Brachyury_hg38::1::8494	2458, -774	in gene, upstream	0	1	7.5	53	2	86	0.852276	Gene TOX3	TOX3, TNRC9, CAGF9	0.0107625	NM_014991.4, XM_011531757.1, XM_005262858.3, XM_011531758.1, XM_011531759.1, XM_011531760.1, XM_011531761.1, XM_011531762.1, XM_011531763.1, XM_011531764.1, XM_011531765.1, XM_011531766.1, XM_011531767.1	-9999999	NP_055806.2	ENSG00000163625	931.887		0.187356	3.36506	0.00076528		HAS2
GeneID:8840	UTRN	6	144,285,298	144,853,034	567736	+	8	2_TiKD-TBXT-POS_Brachyury_hg38::1::20074, 2_TiKD-TBXT-POS_Brachyury_hg38::1::20075, 2_TiKD-TBXT-POS_Brachyury_hg38::1::20076, 2_TiKD-TBXT-POS_Brachyury_hg38::1::20077, 2_TiKD-TBXT-POS_Brachyury_hg38::1::20078, 2_TiKD-TBXT-POS_Brachyury_hg38::1::20079, 2_TiKD-TBXT-POS_Brachyury_hg38::1::20080, 2_TiKD-TBXT-POS_Brachyury_hg38::1::20081	-178, 1934, 332654, 376302, 491006, 538926, 561422, 562830	upstream, in gene, in gene, in gene, in gene, in gene, in gene, in gene	0	1	6	39.75	8	69	0.874069	Gene UTRN	DMDL, FLJ23678, DRP1, DRP, UTRN	0.00078744	NM_006830.3	-9999999	NP_006821.1	ENSG00000127540	1260.9		0.160413	-6.41616	1.39753e-10		WISP1
GeneID:10656	PCDH18	4	137,518,918	137,532,498	13580	-	3	2_TiKD-TBXT-POS_Brachyury_hg38::1::17069, 2_TiKD-TBXT-POS_Brachyury_hg38::1::17070, 2_TiKD-TBXT-POS_Brachyury_hg38::1::17071	2578, -206, -8942	in gene, upstream, upstream	0	1	5.33	35.33	3	55	0.956859	Gene PCDH18	DKFZp434B0923, PCDH18, KIAA1562, PCDH68L	0.00437245	NM_001947.3	-9999999	NP_001938.2	ENSG00000164086	471.344		0.19591	-4.07534	4.59479e-05		KHDRBS3
GeneID:4300	DAB1	1	56,997,906	58,250,539	1252633	-	13	2_TiKD-TBXT-POS_Brachyury_hg38::1::747, 2_TiKD-TBXT-POS_Brachyury_hg38::1::748, 2_TiKD-TBXT-POS_Brachyury_hg38::1::749, 2_TiKD-TBXT-POS_Brachyury_hg38::1::750, 2_TiKD-TBXT-POS_Brachyury_hg38::1::751, 2_TiKD-TBXT-POS_Brachyury_hg38::1::752, 2_TiKD-TBXT-POS_Brachyury_hg38::1::753, 2_TiKD-TBXT-POS_Brachyury_hg38::1::754, 2_TiKD-TBXT-POS_Brachyury_hg38::1::755, 2_TiKD-TBXT-POS_Brachyury_hg38::1::756,…	1165611, 1164427, 939339, 827915, 825835, 800363, 627355, 615147, 609867, 161771, 160539, 38411, -117	in gene, in gene, in gene, in gene, in gene, in gene, in gene, in gene, in gene, in gene, in gene, in gene, upstream	0	1	4.92	56.85	13	220	0.964232	Gene DAB1	DAB1	4.70902e-07	NM_183235.2, NM_183236.2, NM_004580.4, NM_183234.2, XM_011521852.1, XM_011521853.1, XM_011521854.1, XM_011521855.1, XM_011521856.1, XM_005254576.3	-9999999	NP_899058.1, NP_899059.1, NP_004571.2, NP_899057.1	ENSG00000069974	152.097		0.26348	-4.62209	3.79888e-06		MLLT3
GeneID:8905	PCDH1	5	141,852,319	141,878,813	26494	-	4	2_TiKD-TBXT-POS_Brachyury_hg38::1::18419, 2_TiKD-TBXT-POS_Brachyury_hg38::1::18420, 2_TiKD-TBXT-POS_Brachyury_hg38::1::18421, 2_TiKD-TBXT-POS_Brachyury_hg38::1::18422	35645, 29629, 28893, -419	downstream, downstream, downstream, upstream	0	1	12	36.5	4	45	1.12735	Gene PCDH1	PCDH1, MGC45991, PCDH42, PC42, FLJ53887	0.000788249	NM_145159.2, NM_002226.4, XM_011536736.1	-9999999	NP_660142.1, NP_002217.3	ENSG00000184916	252.022		0.217578	3.88163	0.00010376		AP1S2

## Sheet: GO-BP (-1000 to 0bp)
	Description	p.adjust	qvalue	geneID	Count	geneSymbol
GO:0035282	segmentation	1.05587e-08	8.50254e-09	ENSG00000168646/ENSG00000113722/ENSG00000164458/ENSG00000171843/ENSG00000105996/ENSG00000090932/ENSG00000103241/ENSG00000149922/ENSG00000151379	9	AXIN2/CDX1/TBXT/MLLT3/HOXA2/DLL3/FOXF1/TBX6/MSGN1
GO:0003002	regionalization	1.35237e-07	1.08901e-07	ENSG00000168646/ENSG00000164651/ENSG00000113722/ENSG00000164458/ENSG00000171843/ENSG00000163132/ENSG00000105996/ENSG00000090932/ENSG00000103241/ENSG00000149922/ENSG00000128652/ENSG00000151379	12	AXIN2/SP8/CDX1/TBXT/MLLT3/MSX1/HOXA2/DLL3/FOXF1/TBX6/HOXD3/MSGN1
GO:0048705	skeletal system morphogenesis	1.91e-07	1.53805e-07	ENSG00000168646/ENSG00000105991/ENSG00000113722/ENSG00000164458/ENSG00000120075/ENSG00000163132/ENSG00000170961/ENSG00000105996/ENSG00000134853/ENSG00000128652	10	AXIN2/HOXA1/CDX1/TBXT/HOXB5/MSX1/HAS2/HOXA2/PDGFRA/HOXD3
GO:0048706	embryonic skeletal system development	7.9437e-07	6.39677e-07	ENSG00000105991/ENSG00000164458/ENSG00000120075/ENSG00000105996/ENSG00000134853/ENSG00000102678/ENSG00000172789/ENSG00000128652	8	HOXA1/TBXT/HOXB5/HOXA2/PDGFRA/FGF9/HOXC5/HOXD3
GO:0007389	pattern specification process	8.21202e-07	6.61284e-07	ENSG00000168646/ENSG00000164651/ENSG00000113722/ENSG00000164458/ENSG00000171843/ENSG00000163132/ENSG00000105996/ENSG00000090932/ENSG00000103241/ENSG00000149922/ENSG00000128652/ENSG00000151379	12	AXIN2/SP8/CDX1/TBXT/MLLT3/MSX1/HOXA2/DLL3/FOXF1/TBX6/HOXD3/MSGN1
GO:0009952	anterior/posterior pattern specification	9.29591e-07	7.48565e-07	ENSG00000168646/ENSG00000113722/ENSG00000164458/ENSG00000171843/ENSG00000163132/ENSG00000090932/ENSG00000103241/ENSG00000149922/ENSG00000128652	9	AXIN2/CDX1/TBXT/MLLT3/MSX1/DLL3/FOXF1/TBX6/HOXD3
GO:0048562	embryonic organ morphogenesis	2.09992e-06	1.69099e-06	ENSG00000144749/ENSG00000105991/ENSG00000164458/ENSG00000120075/ENSG00000163132/ENSG00000105996/ENSG00000134853/ENSG00000102678/ENSG00000103241/ENSG00000128652	10	LRIG1/HOXA1/TBXT/HOXB5/MSX1/HOXA2/PDGFRA/FGF9/FOXF1/HOXD3
GO:0001756	somitogenesis	5.02926e-06	4.04988e-06	ENSG00000168646/ENSG00000113722/ENSG00000164458/ENSG00000090932/ENSG00000103241/ENSG00000149922	6	AXIN2/CDX1/TBXT/DLL3/FOXF1/TBX6
GO:0061053	somite development	2.15795e-05	1.73772e-05	ENSG00000168646/ENSG00000113722/ENSG00000164458/ENSG00000090932/ENSG00000103241/ENSG00000149922	6	AXIN2/CDX1/TBXT/DLL3/FOXF1/TBX6
GO:0023019	signal transduction involved in regulation of gene expression	3.25131e-05	2.61816e-05	ENSG00000164458/ENSG00000163132/ENSG00000134853/ENSG00000149922	4	TBXT/MSX1/PDGFRA/TBX6
GO:0048568	embryonic organ development	7.37228e-05	5.93663e-05	ENSG00000144749/ENSG00000105991/ENSG00000164458/ENSG00000120075/ENSG00000163132/ENSG00000105996/ENSG00000134853/ENSG00000102678/ENSG00000103241/ENSG00000128652	10	LRIG1/HOXA1/TBXT/HOXB5/MSX1/HOXA2/PDGFRA/FGF9/FOXF1/HOXD3
GO:0051216	cartilage development	0.000148644	0.000119697	ENSG00000168646/ENSG00000111186/ENSG00000163132/ENSG00000102678/ENSG00000019549/ENSG00000128652/ENSG00000104415	7	AXIN2/WNT5B/MSX1/FGF9/SNAI2/HOXD3/CCN4
GO:0048704	embryonic skeletal system morphogenesis	0.000583097	0.000469547	ENSG00000105991/ENSG00000120075/ENSG00000105996/ENSG00000134853/ENSG00000128652	5	HOXA1/HOXB5/HOXA2/PDGFRA/HOXD3
GO:0060349	bone morphogenesis	0.000604769	0.000486998	ENSG00000168646/ENSG00000113722/ENSG00000164458/ENSG00000163132/ENSG00000170961	5	AXIN2/CDX1/TBXT/MSX1/HAS2
GO:0061448	connective tissue development	0.000755213	0.000608145	ENSG00000168646/ENSG00000111186/ENSG00000163132/ENSG00000102678/ENSG00000019549/ENSG00000128652/ENSG00000104415	7	AXIN2/WNT5B/MSX1/FGF9/SNAI2/HOXD3/CCN4
GO:0002062	chondrocyte differentiation	0.000886875	0.000714168	ENSG00000168646/ENSG00000111186/ENSG00000102678/ENSG00000019549/ENSG00000104415	5	AXIN2/WNT5B/FGF9/SNAI2/CCN4
GO:0060485	mesenchyme development	0.00092195	0.000742412	ENSG00000168646/ENSG00000163132/ENSG00000170961/ENSG00000102678/ENSG00000090932/ENSG00000103241/ENSG00000019549	7	AXIN2/MSX1/HAS2/FGF9/DLL3/FOXF1/SNAI2
GO:0007379	segment specification	0.00165336	0.00133139	ENSG00000171843/ENSG00000105996/ENSG00000151379	3	MLLT3/HOXA2/MSGN1
GO:0060348	bone development	0.00203477	0.00163852	ENSG00000168646/ENSG00000113722/ENSG00000164458/ENSG00000163132/ENSG00000170961/ENSG00000104415	6	AXIN2/CDX1/TBXT/MSX1/HAS2/CCN4
GO:0042471	ear morphogenesis	0.00217425	0.00175084	ENSG00000144749/ENSG00000105991/ENSG00000163132/ENSG00000105996/ENSG00000102678	5	LRIG1/HOXA1/MSX1/HOXA2/FGF9
GO:0043583	ear development	0.00366261	0.00294937	ENSG00000184916/ENSG00000144749/ENSG00000105991/ENSG00000163132/ENSG00000105996/ENSG00000102678	6	JAG2/LRIG1/HOXA1/MSX1/HOXA2/FGF9
GO:0021675	nerve development	0.00411067	0.00331017	ENSG00000144749/ENSG00000105991/ENSG00000135919/ENSG00000128652	4	LRIG1/HOXA1/SERPINE2/HOXD3
GO:0001570	vasculogenesis	0.00458495	0.00369209	ENSG00000164458/ENSG00000170961/ENSG00000134817/ENSG00000103241	4	TBXT/HAS2/APLNR/FOXF1
GO:0003007	heart morphogenesis	0.00505169	0.00406794	ENSG00000168646/ENSG00000164458/ENSG00000163132/ENSG00000170961/ENSG00000103241/ENSG00000019549	6	AXIN2/TBXT/MSX1/HAS2/FOXF1/SNAI2
GO:0060317	cardiac epithelial to mesenchymal transition	0.00593352	0.00477804	ENSG00000163132/ENSG00000170961/ENSG00000019549	3	MSX1/HAS2/SNAI2
GO:0060021	roof of mouth development	0.00872919	0.0070293	ENSG00000184916/ENSG00000163132/ENSG00000134853/ENSG00000019549	4	JAG2/MSX1/PDGFRA/SNAI2
GO:0010463	mesenchymal cell proliferation	0.0152134	0.0122508	ENSG00000163132/ENSG00000102678/ENSG00000103241	3	MSX1/FGF9/FOXF1
GO:0003197	endocardial cushion development	0.0152134	0.0122508	ENSG00000163132/ENSG00000103241/ENSG00000019549	3	MSX1/FOXF1/SNAI2
GO:0048701	embryonic cranial skeleton morphogenesis	0.0152134	0.0122508	ENSG00000105991/ENSG00000105996/ENSG00000134853	3	HOXA1/HOXA2/PDGFRA
GO:0060536	cartilage morphogenesis	0.0166314	0.0133927	ENSG00000163132/ENSG00000019549	2	MSX1/SNAI2
GO:0032330	regulation of chondrocyte differentiation	0.0166314	0.0133927	ENSG00000168646/ENSG00000019549/ENSG00000104415	3	AXIN2/SNAI2/CCN4
GO:0048566	embryonic digestive tract development	0.0166314	0.0133927	ENSG00000134853/ENSG00000102678/ENSG00000103241	3	PDGFRA/FGF9/FOXF1
GO:0072132	mesenchyme morphogenesis	0.0178769	0.0143956	ENSG00000163132/ENSG00000103241/ENSG00000019549	3	MSX1/FOXF1/SNAI2
GO:0060070	canonical Wnt signaling pathway	0.0178769	0.0143956	ENSG00000168646/ENSG00000111186/ENSG00000164458/ENSG00000171843/ENSG00000102678/ENSG00000019549	6	AXIN2/WNT5B/TBXT/MLLT3/FGF9/SNAI2
GO:0030178	negative regulation of Wnt signaling pathway	0.0186444	0.0150136	ENSG00000168646/ENSG00000111186/ENSG00000171843/ENSG00000102678/ENSG00000019549	5	AXIN2/WNT5B/MLLT3/FGF9/SNAI2
GO:0014911	positive regulation of smooth muscle cell migration	0.0186444	0.0150136	ENSG00000170961/ENSG00000102678/ENSG00000104415	3	HAS2/FGF9/CCN4
GO:0042476	odontogenesis	0.0189866	0.0152892	ENSG00000184916/ENSG00000168646/ENSG00000163132/ENSG00000134853	4	JAG2/AXIN2/MSX1/PDGFRA
GO:0048505	regulation of timing of cell differentiation	0.0189866	0.0152892	ENSG00000135919/ENSG00000102678	2	SERPINE2/FGF9
GO:0031589	cell-substrate adhesion	0.0189866	0.0152892	ENSG00000152818/ENSG00000087303/ENSG00000129474/ENSG00000170961/ENSG00000103241/ENSG00000128652	6	UTRN/NID2/AJUBA/HAS2/FOXF1/HOXD3
GO:0007494	midgut development	0.0212038	0.0170746	ENSG00000173406/ENSG00000103241	2	DAB1/FOXF1
GO:0040034	regulation of development, heterochronic	0.0212038	0.0170746	ENSG00000135919/ENSG00000102678	2	SERPINE2/FGF9
GO:0007498	mesoderm development	0.0212038	0.0170746	ENSG00000164458/ENSG00000090932/ENSG00000103241/ENSG00000149922	4	TBXT/DLL3/FOXF1/TBX6
GO:0030111	regulation of Wnt signaling pathway	0.0220316	0.0177412	ENSG00000168646/ENSG00000111186/ENSG00000171843/ENSG00000102678/ENSG00000019549/ENSG00000104415	6	AXIN2/WNT5B/MLLT3/FGF9/SNAI2/CCN4
GO:0001649	osteoblast differentiation	0.0220316	0.0177412	ENSG00000168646/ENSG00000105996/ENSG00000102678/ENSG00000019549/ENSG00000104415	5	AXIN2/HOXA2/FGF9/SNAI2/CCN4
GO:0045667	regulation of osteoblast differentiation	0.0251564	0.0202575	ENSG00000168646/ENSG00000105996/ENSG00000019549/ENSG00000104415	4	AXIN2/HOXA2/SNAI2/CCN4
GO:0070527	platelet aggregation	0.0253757	0.0204341	ENSG00000181467/ENSG00000135919/ENSG00000134853	3	RAP2B/SERPINE2/PDGFRA
GO:0001837	epithelial to mesenchymal transition	0.0259976	0.0209349	ENSG00000168646/ENSG00000163132/ENSG00000170961/ENSG00000019549	4	AXIN2/MSX1/HAS2/SNAI2
GO:0048565	digestive tract development	0.0261026	0.0210194	ENSG00000173406/ENSG00000134853/ENSG00000102678/ENSG00000103241	4	DAB1/PDGFRA/FGF9/FOXF1
GO:1904888	cranial skeletal system development	0.0266958	0.0214972	ENSG00000105991/ENSG00000105996/ENSG00000134853	3	HOXA1/HOXA2/PDGFRA
GO:1901213	regulation of transcription from RNA polymerase II promoter involved in heart development	0.0266958	0.0214972	ENSG00000164458/ENSG00000163132	2	TBXT/MSX1
GO:0061035	regulation of cartilage development	0.0279429	0.0225014	ENSG00000168646/ENSG00000019549/ENSG00000104415	3	AXIN2/SNAI2/CCN4
GO:0071300	cellular response to retinoic acid	0.0279429	0.0225014	ENSG00000111186/ENSG00000164458/ENSG00000105996	3	WNT5B/TBXT/HOXA2
GO:0003198	epithelial to mesenchymal transition involved in endocardial cushion formation	0.02849	0.0229419	ENSG00000163132/ENSG00000019549	2	MSX1/SNAI2
GO:0055123	digestive system development	0.0315016	0.0253671	ENSG00000173406/ENSG00000134853/ENSG00000102678/ENSG00000103241	4	DAB1/PDGFRA/FGF9/FOXF1
GO:0090596	sensory organ morphogenesis	0.0315016	0.0253671	ENSG00000144749/ENSG00000105991/ENSG00000163132/ENSG00000105996/ENSG00000102678	5	LRIG1/HOXA1/MSX1/HOXA2/FGF9
GO:0002028	regulation of sodium ion transport	0.032613	0.026262	ENSG00000152818/ENSG00000179094/ENSG00000135919	3	UTRN/PER1/SERPINE2
GO:0010544	negative regulation of platelet activation	0.032613	0.026262	ENSG00000135919/ENSG00000134853	2	SERPINE2/PDGFRA
GO:0048557	embryonic digestive tract morphogenesis	0.032613	0.026262	ENSG00000134853/ENSG00000103241	2	PDGFRA/FOXF1
GO:0050954	sensory perception of mechanical stimulus	0.0337364	0.0271667	ENSG00000144749/ENSG00000105991/ENSG00000135919/ENSG00000019549	4	LRIG1/HOXA1/SERPINE2/SNAI2
GO:0060828	regulation of canonical Wnt signaling pathway	0.0337364	0.0271667	ENSG00000168646/ENSG00000111186/ENSG00000171843/ENSG00000102678/ENSG00000019549	5	AXIN2/WNT5B/MLLT3/FGF9/SNAI2
GO:0042474	middle ear morphogenesis	0.0343909	0.0276937	ENSG00000163132/ENSG00000105996	2	MSX1/HOXA2
GO:0001707	mesoderm formation	0.0346597	0.0279102	ENSG00000164458/ENSG00000103241/ENSG00000149922	3	TBXT/FOXF1/TBX6
GO:0048332	mesoderm morphogenesis	0.0366521	0.0295146	ENSG00000164458/ENSG00000103241/ENSG00000149922	3	TBXT/FOXF1/TBX6
GO:0032331	negative regulation of chondrocyte differentiation	0.0397051	0.031973	ENSG00000019549/ENSG00000104415	2	SNAI2/CCN4
GO:0034109	homotypic cell-cell adhesion	0.0407914	0.0328478	ENSG00000181467/ENSG00000135919/ENSG00000134853	3	RAP2B/SERPINE2/PDGFRA
GO:0042475	odontogenesis of dentin-containing tooth	0.0429371	0.0345757	ENSG00000184916/ENSG00000163132/ENSG00000134853	3	JAG2/MSX1/PDGFRA
GO:0003272	endocardial cushion formation	0.0447458	0.0360321	ENSG00000163132/ENSG00000019549	2	MSX1/SNAI2
GO:0007219	Notch signaling pathway	0.0447458	0.0360321	ENSG00000184916/ENSG00000090932/ENSG00000019549/ENSG00000128652	4	JAG2/DLL3/SNAI2/HOXD3
GO:0030177	positive regulation of Wnt signaling pathway	0.0447458	0.0360321	ENSG00000168646/ENSG00000171843/ENSG00000102678/ENSG00000104415	4	AXIN2/MLLT3/FGF9/CCN4
GO:0048732	gland development	0.0447458	0.0360321	ENSG00000135919/ENSG00000163132/ENSG00000134853/ENSG00000103241/ENSG00000019549/ENSG00000128652	6	SERPINE2/MSX1/PDGFRA/FOXF1/SNAI2/HOXD3
GO:0090090	negative regulation of canonical Wnt signaling pathway	0.0447458	0.0360321	ENSG00000168646/ENSG00000111186/ENSG00000171843/ENSG00000019549	4	AXIN2/WNT5B/MLLT3/SNAI2
GO:0014910	regulation of smooth muscle cell migration	0.0447458	0.0360321	ENSG00000170961/ENSG00000102678/ENSG00000104415	3	HAS2/FGF9/CCN4
GO:0007369	gastrulation	0.0460987	0.0371216	ENSG00000164458/ENSG00000134817/ENSG00000103241/ENSG00000149922	4	TBXT/APLNR/FOXF1/TBX6
GO:0002053	positive regulation of mesenchymal cell proliferation	0.0473181	0.0381035	ENSG00000102678/ENSG00000103241	2	FGF9/FOXF1
GO:0060384	innervation	0.0473181	0.0381035	ENSG00000144749/ENSG00000135919	2	LRIG1/SERPINE2
GO:0048839	inner ear development	0.0485184	0.0390701	ENSG00000184916/ENSG00000144749/ENSG00000105991/ENSG00000102678	4	JAG2/LRIG1/HOXA1/FGF9
GO:0050679	positive regulation of epithelial cell proliferation	0.0505268	0.0406874	ENSG00000164104/ENSG00000170961/ENSG00000102678/ENSG00000134817	4	HMGB2/HAS2/FGF9/APLNR
GO:0048762	mesenchymal cell differentiation	0.0535031	0.043084	ENSG00000168646/ENSG00000163132/ENSG00000170961/ENSG00000019549	4	AXIN2/MSX1/HAS2/SNAI2
GO:0021602	cranial nerve morphogenesis	0.0551107	0.0443786	ENSG00000105991/ENSG00000128652	2	HOXA1/HOXD3
GO:0061037	negative regulation of cartilage development	0.0551107	0.0443786	ENSG00000019549/ENSG00000104415	2	SNAI2/CCN4
GO:0014909	smooth muscle cell migration	0.0565074	0.0455033	ENSG00000170961/ENSG00000102678/ENSG00000104415	3	HAS2/FGF9/CCN4
GO:0010543	regulation of platelet activation	0.056808	0.0457454	ENSG00000135919/ENSG00000134853	2	SERPINE2/PDGFRA
GO:0060325	face morphogenesis	0.056808	0.0457454	ENSG00000163132/ENSG00000134853	2	MSX1/PDGFRA
GO:0071229	cellular response to acid chemical	0.057827	0.046566	ENSG00000111186/ENSG00000164458/ENSG00000105996/ENSG00000134853	4	WNT5B/TBXT/HOXA2/PDGFRA
GO:0042472	inner ear morphogenesis	0.057827	0.046566	ENSG00000144749/ENSG00000105991/ENSG00000102678	3	LRIG1/HOXA1/FGF9
GO:0061311	cell surface receptor signaling pathway involved in heart development	0.057827	0.046566	ENSG00000163132/ENSG00000019549	2	MSX1/SNAI2
GO:1904837	beta-catenin-TCF complex assembly	0.057827	0.046566	ENSG00000168646/ENSG00000140332	2	AXIN2/TLE3
GO:0030278	regulation of ossification	0.0589622	0.0474801	ENSG00000168646/ENSG00000105996/ENSG00000019549/ENSG00000104415	4	AXIN2/HOXA2/SNAI2/CCN4
GO:0030947	regulation of vascular endothelial growth factor receptor signaling pathway	0.0636499	0.0512549	ENSG00000138119/ENSG00000102678	2	MYOF/FGF9
GO:0006024	glycosaminoglycan biosynthetic process	0.0636499	0.0512549	ENSG00000169439/ENSG00000175040/ENSG00000170961	3	SDC2/CHST2/HAS2
GO:0010811	positive regulation of cell-substrate adhesion	0.0636499	0.0512549	ENSG00000152818/ENSG00000170961/ENSG00000103241	3	UTRN/HAS2/FOXF1
GO:0006023	aminoglycan biosynthetic process	0.0642139	0.0517091	ENSG00000169439/ENSG00000175040/ENSG00000170961	3	SDC2/CHST2/HAS2
GO:0010464	regulation of mesenchymal cell proliferation	0.0642139	0.0517091	ENSG00000102678/ENSG00000103241	2	FGF9/FOXF1
GO:0043516	regulation of DNA damage response, signal transduction by p53 class mediator	0.0642139	0.0517091	ENSG00000163132/ENSG00000019549	2	MSX1/SNAI2
GO:0014812	muscle cell migration	0.0649643	0.0523134	ENSG00000170961/ENSG00000102678/ENSG00000104415	3	HAS2/FGF9/CCN4
GO:0032526	response to retinoic acid	0.0649643	0.0523134	ENSG00000111186/ENSG00000164458/ENSG00000105996	3	WNT5B/TBXT/HOXA2
GO:0003203	endocardial cushion morphogenesis	0.0652056	0.0525076	ENSG00000163132/ENSG00000019549	2	MSX1/SNAI2
GO:0010837	regulation of keratinocyte proliferation	0.0652056	0.0525076	ENSG00000170961/ENSG00000019549	2	HAS2/SNAI2
GO:0060323	head morphogenesis	0.068218	0.0549334	ENSG00000163132/ENSG00000134853	2	MSX1/PDGFRA
GO:0007160	cell-matrix adhesion	0.0695695	0.0560217	ENSG00000152818/ENSG00000087303/ENSG00000129474/ENSG00000128652	4	UTRN/NID2/AJUBA/HOXD3
GO:0042692	muscle cell differentiation	0.0698662	0.0562607	ENSG00000163132/ENSG00000138119/ENSG00000134853/ENSG00000102678/ENSG00000103241	5	MSX1/MYOF/PDGFRA/FGF9/FOXF1
GO:0000578	embryonic axis specification	0.0698662	0.0562607	ENSG00000164458/ENSG00000149922	2	TBXT/TBX6
GO:0050678	regulation of epithelial cell proliferation	0.0698928	0.0562821	ENSG00000164104/ENSG00000170961/ENSG00000102678/ENSG00000134817/ENSG00000019549	5	HMGB2/HAS2/FGF9/APLNR/SNAI2
GO:0098742	cell-cell adhesion via plasma-membrane adhesion molecules	0.0698928	0.0562821	ENSG00000156453/ENSG00000173406/ENSG00000189184/ENSG00000129474	4	PCDH1/DAB1/PCDH18/AJUBA
GO:0021587	cerebellum morphogenesis	0.0715087	0.0575833	ENSG00000173406/ENSG00000135919	2	DAB1/SERPINE2
GO:0035270	endocrine system development	0.0775338	0.0624351	ENSG00000163132/ENSG00000134853/ENSG00000128652	3	MSX1/PDGFRA/HOXD3
GO:0048710	regulation of astrocyte differentiation	0.0853127	0.0686992	ENSG00000173406/ENSG00000135919	2	DAB1/SERPINE2
GO:0030326	embryonic limb morphogenesis	0.0856469	0.0689683	ENSG00000164651/ENSG00000163132/ENSG00000102678	3	SP8/MSX1/FGF9
GO:0035113	embryonic appendage morphogenesis	0.0856469	0.0689683	ENSG00000164651/ENSG00000163132/ENSG00000102678	3	SP8/MSX1/FGF9
GO:0001704	formation of primary germ layer	0.0860914	0.0693262	ENSG00000164458/ENSG00000103241/ENSG00000149922	3	TBXT/FOXF1/TBX6
GO:0021575	hindbrain morphogenesis	0.0860914	0.0693262	ENSG00000173406/ENSG00000135919	2	DAB1/SERPINE2
GO:0001503	ossification	0.0865153	0.0696676	ENSG00000168646/ENSG00000105996/ENSG00000102678/ENSG00000019549/ENSG00000104415	5	AXIN2/HOXA2/FGF9/SNAI2/CCN4
GO:0048863	stem cell differentiation	0.0894488	0.0720298	ENSG00000164458/ENSG00000163132/ENSG00000134853/ENSG00000019549	4	TBXT/MSX1/PDGFRA/SNAI2
GO:0007224	smoothened signaling pathway	0.0906327	0.0729832	ENSG00000135919/ENSG00000102678/ENSG00000103241	3	SERPINE2/FGF9/FOXF1
GO:0043616	keratinocyte proliferation	0.0907683	0.0730923	ENSG00000170961/ENSG00000019549	2	HAS2/SNAI2
GO:0008584	male gonad development	0.0908511	0.073159	ENSG00000164104/ENSG00000134853/ENSG00000102678	3	HMGB2/PDGFRA/FGF9
GO:0046546	development of primary male sexual characteristics	0.0918612	0.0739724	ENSG00000164104/ENSG00000134853/ENSG00000102678	3	HMGB2/PDGFRA/FGF9
GO:0060324	face development	0.0923116	0.0743351	ENSG00000163132/ENSG00000134853	2	MSX1/PDGFRA
GO:0009948	anterior/posterior axis specification	0.0993946	0.0800388	ENSG00000164458/ENSG00000149922	2	TBXT/TBX6
GO:0010171	body morphogenesis	0.102572	0.0825974	ENSG00000163132/ENSG00000134853	2	MSX1/PDGFRA
GO:0045598	regulation of fat cell differentiation	0.102975	0.0829223	ENSG00000111186/ENSG00000019549/ENSG00000104415	3	WNT5B/SNAI2/CCN4
GO:0007605	sensory perception of sound	0.102975	0.0829223	ENSG00000144749/ENSG00000105991/ENSG00000019549	3	LRIG1/HOXA1/SNAI2
GO:0030195	negative regulation of blood coagulation	0.102975	0.0829223	ENSG00000135919/ENSG00000134853	2	SERPINE2/PDGFRA
GO:0048546	digestive tract morphogenesis	0.102975	0.0829223	ENSG00000134853/ENSG00000103241	2	PDGFRA/FOXF1
GO:0050673	epithelial cell proliferation	0.102975	0.0829223	ENSG00000164104/ENSG00000170961/ENSG00000102678/ENSG00000134817/ENSG00000019549	5	HMGB2/HAS2/FGF9/APLNR/SNAI2
GO:0050768	negative regulation of neurogenesis	0.103874	0.0836458	ENSG00000173406/ENSG00000105996/ENSG00000090932/ENSG00000149922	4	DAB1/HOXA2/DLL3/TBX6
GO:0021545	cranial nerve development	0.103874	0.0836458	ENSG00000105991/ENSG00000128652	2	HOXA1/HOXD3
GO:1900047	negative regulation of hemostasis	0.103874	0.0836458	ENSG00000135919/ENSG00000134853	2	SERPINE2/PDGFRA
GO:0061041	regulation of wound healing	0.104254	0.0839522	ENSG00000135919/ENSG00000134853/ENSG00000104415	3	SERPINE2/PDGFRA/CCN4
GO:0090287	regulation of cellular response to growth factor stimulus	0.10834	0.0872422	ENSG00000128045/ENSG00000163132/ENSG00000138119/ENSG00000102678	4	RASL11B/MSX1/MYOF/FGF9
GO:0051150	regulation of smooth muscle cell differentiation	0.109292	0.0880089	ENSG00000102678/ENSG00000103241	2	FGF9/FOXF1
GO:0050819	negative regulation of coagulation	0.112429	0.090535	ENSG00000135919/ENSG00000134853	2	SERPINE2/PDGFRA
GO:0035107	appendage morphogenesis	0.113368	0.0912907	ENSG00000164651/ENSG00000163132/ENSG00000102678	3	SP8/MSX1/FGF9
GO:0035108	limb morphogenesis	0.113368	0.0912907	ENSG00000164651/ENSG00000163132/ENSG00000102678	3	SP8/MSX1/FGF9
GO:0007632	visual behavior	0.11387	0.0916951	ENSG00000105991/ENSG00000134138	2	HOXA1/MEIS2
GO:0030203	glycosaminoglycan metabolic process	0.117472	0.094596	ENSG00000169439/ENSG00000175040/ENSG00000170961	3	SDC2/CHST2/HAS2
GO:0046661	male sex differentiation	0.118562	0.0954736	ENSG00000164104/ENSG00000134853/ENSG00000102678	3	HMGB2/PDGFRA/FGF9
GO:0051961	negative regulation of nervous system development	0.119541	0.0962617	ENSG00000173406/ENSG00000105996/ENSG00000090932/ENSG00000149922	4	DAB1/HOXA2/DLL3/TBX6
GO:0030902	hindbrain development	0.12075	0.0972357	ENSG00000173406/ENSG00000135919/ENSG00000105996	3	DAB1/SERPINE2/HOXA2
GO:0006022	aminoglycan metabolic process	0.121848	0.0981201	ENSG00000169439/ENSG00000175040/ENSG00000170961	3	SDC2/CHST2/HAS2
GO:0045668	negative regulation of osteoblast differentiation	0.132882	0.107005	ENSG00000168646/ENSG00000105996	2	AXIN2/HOXA2
GO:0009880	embryonic pattern specification	0.136095	0.109592	ENSG00000164458/ENSG00000149922	2	TBXT/TBX6
GO:0030168	platelet activation	0.137385	0.110631	ENSG00000181467/ENSG00000135919/ENSG00000134853	3	RAP2B/SERPINE2/PDGFRA
GO:0043550	regulation of lipid kinase activity	0.142552	0.114792	ENSG00000080839/ENSG00000134853	2	RBL1/PDGFRA
GO:0045600	positive regulation of fat cell differentiation	0.145796	0.117404	ENSG00000111186/ENSG00000019549	2	WNT5B/SNAI2
GO:1903034	regulation of response to wounding	0.15153	0.122022	ENSG00000135919/ENSG00000134853/ENSG00000104415	3	SERPINE2/PDGFRA/CCN4
GO:0030324	lung development	0.152686	0.122953	ENSG00000134853/ENSG00000102678/ENSG00000103241	3	PDGFRA/FGF9/FOXF1
GO:0051148	negative regulation of muscle cell differentiation	0.155581	0.125284	ENSG00000163132/ENSG00000102678	2	MSX1/FGF9
GO:0010721	negative regulation of cell development	0.157333	0.126695	ENSG00000173406/ENSG00000105996/ENSG00000090932/ENSG00000149922	4	DAB1/HOXA2/DLL3/TBX6
GO:0072091	regulation of stem cell proliferation	0.157333	0.126695	ENSG00000164104/ENSG00000019549	2	HMGB2/SNAI2
GO:0030323	respiratory tube development	0.157333	0.126695	ENSG00000134853/ENSG00000102678/ENSG00000103241	3	PDGFRA/FGF9/FOXF1
GO:0048736	appendage development	0.157464	0.1268	ENSG00000164651/ENSG00000163132/ENSG00000102678	3	SP8/MSX1/FGF9
GO:0060173	limb development	0.157464	0.1268	ENSG00000164651/ENSG00000163132/ENSG00000102678	3	SP8/MSX1/FGF9
GO:0042698	ovulation cycle	0.157932	0.127177	ENSG00000170961/ENSG00000134853	2	HAS2/PDGFRA
GO:0007178	transmembrane receptor protein serine/threonine kinase signaling pathway	0.158527	0.127656	ENSG00000128045/ENSG00000164458/ENSG00000163132/ENSG00000102678	4	RASL11B/TBXT/MSX1/FGF9
GO:0001101	response to acid chemical	0.169779	0.136717	ENSG00000111186/ENSG00000164458/ENSG00000105996/ENSG00000134853	4	WNT5B/TBXT/HOXA2/PDGFRA
GO:0006814	sodium ion transport	0.171116	0.137794	ENSG00000152818/ENSG00000179094/ENSG00000135919	3	UTRN/PER1/SERPINE2
GO:0030193	regulation of blood coagulation	0.17527	0.141139	ENSG00000135919/ENSG00000134853	2	SERPINE2/PDGFRA
GO:0007596	blood coagulation	0.177433	0.14288	ENSG00000181467/ENSG00000069974/ENSG00000135919/ENSG00000134853	4	RAP2B/RAB27A/SERPINE2/PDGFRA
GO:1900046	regulation of hemostasis	0.177433	0.14288	ENSG00000135919/ENSG00000134853	2	SERPINE2/PDGFRA
GO:0048844	artery morphogenesis	0.178468	0.143714	ENSG00000105991/ENSG00000103241	2	HOXA1/FOXF1
GO:0051145	smooth muscle cell differentiation	0.178468	0.143714	ENSG00000102678/ENSG00000103241	2	FGF9/FOXF1
GO:0061180	mammary gland epithelium development	0.178468	0.143714	ENSG00000163132/ENSG00000103241	2	MSX1/FOXF1
GO:0001701	in utero embryonic development	0.178468	0.143714	ENSG00000184916/ENSG00000163132/ENSG00000134853/ENSG00000103241	4	JAG2/MSX1/PDGFRA/FOXF1
GO:0007599	hemostasis	0.178468	0.143714	ENSG00000181467/ENSG00000069974/ENSG00000135919/ENSG00000134853	4	RAP2B/RAB27A/SERPINE2/PDGFRA
GO:0050817	coagulation	0.178468	0.143714	ENSG00000181467/ENSG00000069974/ENSG00000135919/ENSG00000134853	4	RAP2B/RAB27A/SERPINE2/PDGFRA
GO:0031016	pancreas development	0.178468	0.143714	ENSG00000134138/ENSG00000103241	2	MEIS2/FOXF1
GO:0051147	regulation of muscle cell differentiation	0.179403	0.144467	ENSG00000163132/ENSG00000102678/ENSG00000103241	3	MSX1/FGF9/FOXF1
GO:0001654	eye development	0.179403	0.144467	ENSG00000111186/ENSG00000134138/ENSG00000134853/ENSG00000102678	4	WNT5B/MEIS2/PDGFRA/FGF9
GO:0050818	regulation of coagulation	0.18148	0.146139	ENSG00000135919/ENSG00000134853	2	SERPINE2/PDGFRA
GO:0045665	negative regulation of neuron differentiation	0.18148	0.146139	ENSG00000173406/ENSG00000105996/ENSG00000149922	3	DAB1/HOXA2/TBX6
GO:0060541	respiratory system development	0.18148	0.146139	ENSG00000134853/ENSG00000102678/ENSG00000103241	3	PDGFRA/FGF9/FOXF1
GO:0150063	visual system development	0.18148	0.146139	ENSG00000111186/ENSG00000134138/ENSG00000134853/ENSG00000102678	4	WNT5B/MEIS2/PDGFRA/FGF9
GO:0061045	negative regulation of wound healing	0.183589	0.147838	ENSG00000135919/ENSG00000134853	2	SERPINE2/PDGFRA
GO:0010810	regulation of cell-substrate adhesion	0.183589	0.147838	ENSG00000152818/ENSG00000170961/ENSG00000103241	3	UTRN/HAS2/FOXF1
GO:0030198	extracellular matrix organization	0.184638	0.148682	ENSG00000087303/ENSG00000170961/ENSG00000134853/ENSG00000103241	4	NID2/HAS2/PDGFRA/FOXF1
GO:0008589	regulation of smoothened signaling pathway	0.188017	0.151403	ENSG00000135919/ENSG00000102678	2	SERPINE2/FGF9
GO:0009798	axis specification	0.188017	0.151403	ENSG00000164458/ENSG00000149922	2	TBXT/TBX6
GO:0007411	axon guidance	0.190695	0.153559	ENSG00000173406/ENSG00000105996/ENSG00000182168	3	DAB1/HOXA2/UNC5C
GO:0048880	sensory system development	0.192206	0.154777	ENSG00000111186/ENSG00000134138/ENSG00000134853/ENSG00000102678	4	WNT5B/MEIS2/PDGFRA/FGF9
GO:0097485	neuron projection guidance	0.192206	0.154777	ENSG00000173406/ENSG00000105996/ENSG00000182168	3	DAB1/HOXA2/UNC5C
GO:0045685	regulation of glial cell differentiation	0.192206	0.154777	ENSG00000173406/ENSG00000135919	2	DAB1/SERPINE2
GO:0008406	gonad development	0.194252	0.156424	ENSG00000164104/ENSG00000134853/ENSG00000102678	3	HMGB2/PDGFRA/FGF9
GO:0032102	negative regulation of response to external stimulus	0.194252	0.156424	ENSG00000135919/ENSG00000134853/ENSG00000103241/ENSG00000019549	4	SERPINE2/PDGFRA/FOXF1/SNAI2
GO:0045137	development of primary sexual characteristics	0.194252	0.156424	ENSG00000164104/ENSG00000134853/ENSG00000102678	3	HMGB2/PDGFRA/FGF9
GO:2001020	regulation of response to DNA damage stimulus	0.194252	0.156424	ENSG00000168646/ENSG00000163132/ENSG00000019549	3	AXIN2/MSX1/SNAI2
GO:0030279	negative regulation of ossification	0.194252	0.156424	ENSG00000168646/ENSG00000105996	2	AXIN2/HOXA2
GO:0001553	luteinization	0.194252	0.156424	ENSG00000134853	1	PDGFRA
GO:0001778	plasma membrane repair	0.194252	0.156424	ENSG00000138119	1	MYOF
GO:0001840	neural plate development	0.194252	0.156424	ENSG00000164458	1	TBXT
GO:0007440	foregut morphogenesis	0.194252	0.156424	ENSG00000103241	1	FOXF1
GO:0014041	regulation of neuron maturation	0.194252	0.156424	ENSG00000149922	1	TBX6
GO:0014877	response to muscle inactivity involved in regulation of muscle adaptation	0.194252	0.156424	ENSG00000152818	1	UTRN
GO:0014894	response to denervation involved in regulation of muscle adaptation	0.194252	0.156424	ENSG00000152818	1	UTRN
GO:0021932	hindbrain radial glia guided cell migration	0.194252	0.156424	ENSG00000173406	1	DAB1
GO:0033629	negative regulation of cell adhesion mediated by integrin	0.194252	0.156424	ENSG00000019549	1	SNAI2
GO:0035878	nail development	0.194252	0.156424	ENSG00000163132	1	MSX1
GO:0042492	gamma-delta T cell differentiation	0.194252	0.156424	ENSG00000184916	1	JAG2
GO:0048570	notochord morphogenesis	0.194252	0.156424	ENSG00000164458	1	TBXT
GO:0048617	embryonic foregut morphogenesis	0.194252	0.156424	ENSG00000103241	1	FOXF1
GO:0048703	embryonic viscerocranium morphogenesis	0.194252	0.156424	ENSG00000105996	1	HOXA2
GO:0070601	centromeric sister chromatid cohesion	0.194252	0.156424	ENSG00000168646	1	AXIN2
GO:0090009	primitive streak formation	0.194252	0.156424	ENSG00000164458	1	TBXT
GO:0097278	complement-dependent cytotoxicity	0.194252	0.156424	ENSG00000069974	1	RAB27A
GO:2000288	positive regulation of myoblast proliferation	0.194252	0.156424	ENSG00000134138	1	MEIS2
GO:0043473	pigmentation	0.194646	0.156742	ENSG00000069974/ENSG00000019549	2	RAB27A/SNAI2
GO:0050866	negative regulation of cell activation	0.194646	0.156742	ENSG00000135919/ENSG00000134853/ENSG00000103241	3	SERPINE2/PDGFRA/FOXF1
GO:0090092	regulation of transmembrane receptor protein serine/threonine kinase signaling pathway	0.194646	0.156742	ENSG00000128045/ENSG00000163132/ENSG00000102678	3	RASL11B/MSX1/FGF9
GO:0010959	regulation of metal ion transport	0.194646	0.156742	ENSG00000152818/ENSG00000179094/ENSG00000135919/ENSG00000134817	4	UTRN/PER1/SERPINE2/APLNR
GO:0048708	astrocyte differentiation	0.194646	0.156742	ENSG00000173406/ENSG00000135919	2	DAB1/SERPINE2
GO:0090100	positive regulation of transmembrane receptor protein serine/threonine kinase signaling pathway	0.194646	0.156742	ENSG00000163132/ENSG00000102678	2	MSX1/FGF9
GO:0009953	dorsal/ventral pattern formation	0.194646	0.156742	ENSG00000164651/ENSG00000105996	2	SP8/HOXA2
GO:1903035	negative regulation of response to wounding	0.194646	0.156742	ENSG00000135919/ENSG00000134853	2	SERPINE2/PDGFRA
GO:0003413	chondrocyte differentiation involved in endochondral bone morphogenesis	0.194646	0.156742	ENSG00000168646	1	AXIN2
GO:0006044	N-acetylglucosamine metabolic process	0.194646	0.156742	ENSG00000175040	1	CHST2
GO:0010739	positive regulation of protein kinase A signaling	0.194646	0.156742	ENSG00000131016	1	AKAP12
GO:0014870	response to muscle inactivity	0.194646	0.156742	ENSG00000152818	1	UTRN
GO:0032474	otolith morphogenesis	0.194646	0.156742	ENSG00000144749	1	LRIG1
GO:0032525	somite rostral/caudal axis specification	0.194646	0.156742	ENSG00000149922	1	TBX6
GO:0033327	Leydig cell differentiation	0.194646	0.156742	ENSG00000134853	1	PDGFRA
GO:0034350	regulation of glial cell apoptotic process	0.194646	0.156742	ENSG00000131016	1	AKAP12
GO:0035973	aggrephagy	0.194646	0.156742	ENSG00000163625	1	WDFY3
GO:0061314	Notch signaling involved in heart development	0.194646	0.156742	ENSG00000019549	1	SNAI2
GO:1901201	regulation of extracellular matrix assembly	0.194646	0.156742	ENSG00000170961	1	HAS2
GO:0048010	vascular endothelial growth factor receptor signaling pathway	0.194646	0.156742	ENSG00000138119/ENSG00000102678	2	MYOF/FGF9
GO:0016358	dendrite development	0.199842	0.160925	ENSG00000173406/ENSG00000169439/ENSG00000165300	3	DAB1/SDC2/SLITRK5
GO:0030901	midbrain development	0.200367	0.161348	ENSG00000163132/ENSG00000102678	2	MSX1/FGF9
GO:0002887	negative regulation of myeloid leukocyte mediated immunity	0.201061	0.161907	ENSG00000103241	1	FOXF1
GO:0010755	regulation of plasminogen activation	0.201061	0.161907	ENSG00000135919	1	SERPINE2
GO:0021681	cerebellar granular layer development	0.201061	0.161907	ENSG00000135919	1	SERPINE2
GO:0032075	positive regulation of nuclease activity	0.201061	0.161907	ENSG00000164104	1	HMGB2
GO:0033004	negative regulation of mast cell activation	0.201061	0.161907	ENSG00000103241	1	FOXF1
GO:0070307	lens fiber cell development	0.201061	0.161907	ENSG00000111186	1	WNT5B
GO:0070486	leukocyte aggregation	0.201061	0.161907	ENSG00000170961	1	HAS2
GO:0072537	fibroblast activation	0.201061	0.161907	ENSG00000131016	1	AKAP12
GO:0090331	negative regulation of platelet aggregation	0.201061	0.161907	ENSG00000135919	1	SERPINE2
GO:2000052	positive regulation of non-canonical Wnt signaling pathway	0.201061	0.161907	ENSG00000171843	1	MLLT3
GO:0045444	fat cell differentiation	0.201098	0.161936	ENSG00000111186/ENSG00000019549/ENSG00000104415	3	WNT5B/SNAI2/CCN4
GO:0060840	artery development	0.201098	0.161936	ENSG00000105991/ENSG00000103241	2	HOXA1/FOXF1
GO:0007320	insemination	0.202324	0.162924	ENSG00000135919	1	SERPINE2
GO:0010763	positive regulation of fibroblast migration	0.202324	0.162924	ENSG00000131016	1	AKAP12
GO:0010766	negative regulation of sodium ion transport	0.202324	0.162924	ENSG00000135919	1	SERPINE2
GO:0035330	regulation of hippo signaling	0.202324	0.162924	ENSG00000129474	1	AJUBA
GO:0038007	netrin-activated signaling pathway	0.202324	0.162924	ENSG00000182168	1	UNC5C
GO:0043116	negative regulation of vascular permeability	0.202324	0.162924	ENSG00000131016	1	AKAP12
GO:0050872	white fat cell differentiation	0.202324	0.162924	ENSG00000019549	1	SNAI2
GO:0051549	positive regulation of keratinocyte migration	0.202324	0.162924	ENSG00000170961	1	HAS2
GO:0051645	Golgi localization	0.202324	0.162924	ENSG00000173406	1	DAB1
GO:0060379	cardiac muscle cell myoblast differentiation	0.202324	0.162924	ENSG00000164458	1	TBXT
GO:2001053	regulation of mesenchymal cell apoptotic process	0.202324	0.162924	ENSG00000163132	1	MSX1
GO:0043062	extracellular structure organization	0.202324	0.162924	ENSG00000087303/ENSG00000170961/ENSG00000134853/ENSG00000103241	4	NID2/HAS2/PDGFRA/FOXF1
GO:0048608	reproductive structure development	0.202324	0.162924	ENSG00000164104/ENSG00000135919/ENSG00000134853/ENSG00000102678	4	HMGB2/SERPINE2/PDGFRA/FGF9
GO:0061458	reproductive system development	0.202324	0.162924	ENSG00000164104/ENSG00000135919/ENSG00000134853/ENSG00000102678	4	HMGB2/SERPINE2/PDGFRA/FGF9
GO:0001938	positive regulation of endothelial cell proliferation	0.202324	0.162924	ENSG00000164104/ENSG00000134817	2	HMGB2/APLNR
GO:0021549	cerebellum development	0.202324	0.162924	ENSG00000173406/ENSG00000135919	2	DAB1/SERPINE2
GO:0045165	cell fate commitment	0.202324	0.162924	ENSG00000184916/ENSG00000105996/ENSG00000149922	3	JAG2/HOXA2/TBX6
GO:0003128	heart field specification	0.202324	0.162924	ENSG00000168646	1	AXIN2
GO:0003214	cardiac left ventricle morphogenesis	0.202324	0.162924	ENSG00000103241	1	FOXF1
GO:0010838	positive regulation of keratinocyte proliferation	0.202324	0.162924	ENSG00000170961	1	HAS2
GO:0010839	negative regulation of keratinocyte proliferation	0.202324	0.162924	ENSG00000019549	1	SNAI2
GO:0014854	response to inactivity	0.202324	0.162924	ENSG00000152818	1	UTRN
GO:0030213	hyaluronan biosynthetic process	0.202324	0.162924	ENSG00000170961	1	HAS2
GO:0032486	Rap protein signal transduction	0.202324	0.162924	ENSG00000181467	1	RAP2B
GO:0033151	V(D)J recombination	0.202324	0.162924	ENSG00000164104	1	HMGB2
GO:0043320	natural killer cell degranulation	0.202324	0.162924	ENSG00000069974	1	RAB27A
GO:0043517	positive regulation of DNA damage response, signal transduction by p53 class mediator	0.202324	0.162924	ENSG00000163132	1	MSX1
GO:0045198	establishment of epithelial cell apical/basal polarity	0.202324	0.162924	ENSG00000103241	1	FOXF1
GO:0045836	positive regulation of meiotic nuclear division	0.202324	0.162924	ENSG00000163132	1	MSX1
GO:0048368	lateral mesoderm development	0.202324	0.162924	ENSG00000103241	1	FOXF1
GO:0051770	positive regulation of nitric-oxide synthase biosynthetic process	0.202324	0.162924	ENSG00000131016	1	AKAP12
GO:0090677	reversible differentiation	0.202324	0.162924	ENSG00000102678	1	FGF9
GO:0097152	mesenchymal cell apoptotic process	0.202324	0.162924	ENSG00000163132	1	MSX1
GO:1905064	negative regulation of vascular smooth muscle cell differentiation	0.202324	0.162924	ENSG00000102678	1	FGF9
GO:2000095	regulation of Wnt signaling pathway, planar cell polarity pathway	0.202324	0.162924	ENSG00000171843	1	MLLT3
GO:0030330	DNA damage response, signal transduction by p53 class mediator	0.204528	0.164699	ENSG00000163132/ENSG00000019549	2	MSX1/SNAI2
GO:0007351	tripartite regional subdivision	0.204528	0.164699	ENSG00000164458	1	TBXT
GO:0007512	adult heart development	0.204528	0.164699	ENSG00000134817	1	APLNR
GO:0008595	anterior/posterior axis specification, embryo	0.204528	0.164699	ENSG00000164458	1	TBXT
GO:0014874	response to stimulus involved in regulation of muscle adaptation	0.204528	0.164699	ENSG00000152818	1	UTRN
GO:0021535	cell migration in hindbrain	0.204528	0.164699	ENSG00000173406	1	DAB1
GO:0030238	male sex determination	0.204528	0.164699	ENSG00000102678	1	FGF9
GO:0032927	positive regulation of activin receptor signaling pathway	0.204528	0.164699	ENSG00000102678	1	FGF9
GO:0034111	negative regulation of homotypic cell-cell adhesion	0.204528	0.164699	ENSG00000135919	1	SERPINE2
GO:0035810	positive regulation of urine volume	0.204528	0.164699	ENSG00000170961	1	HAS2
GO:0042074	cell migration involved in gastrulation	0.204528	0.164699	ENSG00000164458	1	TBXT
GO:0042921	glucocorticoid receptor signaling pathway	0.204528	0.164699	ENSG00000179094	1	PER1
GO:0048712	negative regulation of astrocyte differentiation	0.204528	0.164699	ENSG00000173406	1	DAB1
GO:0048840	otolith development	0.204528	0.164699	ENSG00000144749	1	LRIG1
GO:0060841	venous blood vessel development	0.204528	0.164699	ENSG00000103241	1	FOXF1
GO:0071316	cellular response to nicotine	0.204528	0.164699	ENSG00000163132	1	MSX1
GO:2001237	negative regulation of extrinsic apoptotic signaling pathway	0.204992	0.165073	ENSG00000164104/ENSG00000019549	2	HMGB2/SNAI2
GO:1903510	mucopolysaccharide metabolic process	0.204992	0.165073	ENSG00000175040/ENSG00000170961	2	CHST2/HAS2
GO:0007548	sex differentiation	0.204992	0.165073	ENSG00000164104/ENSG00000134853/ENSG00000102678	3	HMGB2/PDGFRA/FGF9
GO:0007368	determination of left/right symmetry	0.204992	0.165073	ENSG00000164458/ENSG00000103241	2	TBXT/FOXF1
GO:0002076	osteoblast development	0.204992	0.165073	ENSG00000105996	1	HOXA2
GO:0031958	corticosteroid receptor signaling pathway	0.204992	0.165073	ENSG00000179094	1	PER1
GO:0032105	negative regulation of response to extracellular stimulus	0.204992	0.165073	ENSG00000019549	1	SNAI2
GO:0032108	negative regulation of response to nutrient levels	0.204992	0.165073	ENSG00000019549	1	SNAI2
GO:0034349	glial cell apoptotic process	0.204992	0.165073	ENSG00000131016	1	AKAP12
GO:0043518	negative regulation of DNA damage response, signal transduction by p53 class mediator	0.204992	0.165073	ENSG00000019549	1	SNAI2
GO:0051547	regulation of keratinocyte migration	0.204992	0.165073	ENSG00000170961	1	HAS2
GO:0060556	regulation of vitamin D biosynthetic process	0.204992	0.165073	ENSG00000019549	1	SNAI2
GO:0061548	ganglion development	0.204992	0.165073	ENSG00000182168	1	UNC5C
GO:0090036	regulation of protein kinase C signaling	0.204992	0.165073	ENSG00000131016	1	AKAP12
GO:1900037	regulation of cellular response to hypoxia	0.204992	0.165073	ENSG00000129474	1	AJUBA
GO:1900239	regulation of phenotypic switching	0.204992	0.165073	ENSG00000102678	1	FGF9
GO:0022037	metencephalon development	0.204992	0.165073	ENSG00000173406/ENSG00000135919	2	DAB1/SERPINE2
GO:0010769	regulation of cell morphogenesis involved in differentiation	0.204992	0.165073	ENSG00000173406/ENSG00000169439/ENSG00000170961	3	DAB1/SDC2/HAS2
GO:0009314	response to radiation	0.204992	0.165073	ENSG00000105991/ENSG00000179094/ENSG00000134138/ENSG00000019549	4	HOXA1/PER1/MEIS2/SNAI2
GO:0042303	molting cycle	0.204992	0.165073	ENSG00000144749/ENSG00000179094	2	LRIG1/PER1
GO:0042633	hair cycle	0.204992	0.165073	ENSG00000144749/ENSG00000179094	2	LRIG1/PER1
GO:0072089	stem cell proliferation	0.204992	0.165073	ENSG00000164104/ENSG00000019549	2	HMGB2/SNAI2
GO:0002323	natural killer cell activation involved in immune response	0.204992	0.165073	ENSG00000069974	1	RAB27A
GO:0006071	glycerol metabolic process	0.204992	0.165073	ENSG00000138119	1	MYOF
GO:0006266	DNA ligation	0.204992	0.165073	ENSG00000164104	1	HMGB2
GO:0014067	negative regulation of phosphatidylinositol 3-kinase signaling	0.204992	0.165073	ENSG00000135919	1	SERPINE2
GO:0044849	estrous cycle	0.204992	0.165073	ENSG00000170961	1	HAS2
GO:0048339	paraxial mesoderm development	0.204992	0.165073	ENSG00000090932	1	DLL3
GO:0055003	cardiac myofibril assembly	0.204992	0.165073	ENSG00000134853	1	PDGFRA
GO:0060644	mammary gland epithelial cell differentiation	0.204992	0.165073	ENSG00000103241	1	FOXF1
GO:0060693	regulation of branching involved in salivary gland morphogenesis	0.204992	0.165073	ENSG00000019549	1	SNAI2
GO:0061298	retina vasculature development in camera-type eye	0.204992	0.165073	ENSG00000134853	1	PDGFRA
GO:0070293	renal absorption	0.204992	0.165073	ENSG00000170961	1	HAS2
GO:0072189	ureter development	0.204992	0.165073	ENSG00000103241	1	FOXF1
GO:0072224	metanephric glomerulus development	0.204992	0.165073	ENSG00000134853	1	PDGFRA
GO:1901071	glucosamine-containing compound metabolic process	0.204992	0.165073	ENSG00000175040	1	CHST2
GO:2000811	negative regulation of anoikis	0.204992	0.165073	ENSG00000019549	1	SNAI2
GO:2000027	regulation of animal organ morphogenesis	0.209017	0.168313	ENSG00000171843/ENSG00000163132/ENSG00000019549	3	MLLT3/MSX1/SNAI2
GO:0048661	positive regulation of smooth muscle cell proliferation	0.209851	0.168985	ENSG00000102678/ENSG00000104415	2	FGF9/CCN4
GO:0035313	wound healing, spreading of epidermal cells	0.209851	0.168985	ENSG00000129474	1	AJUBA
GO:0036342	post-anal tail morphogenesis	0.209851	0.168985	ENSG00000164458	1	TBXT
GO:0043153	entrainment of circadian clock by photoperiod	0.209851	0.168985	ENSG00000179094	1	PER1
GO:0048532	anatomical structure arrangement	0.209851	0.168985	ENSG00000173406	1	DAB1
GO:0060438	trachea development	0.209851	0.168985	ENSG00000103241	1	FOXF1
GO:0072148	epithelial cell fate commitment	0.209851	0.168985	ENSG00000184916	1	JAG2
GO:0090330	regulation of platelet aggregation	0.209851	0.168985	ENSG00000135919	1	SERPINE2
GO:2000647	negative regulation of stem cell proliferation	0.209851	0.168985	ENSG00000019549	1	SNAI2
GO:0051146	striated muscle cell differentiation	0.209851	0.168985	ENSG00000163132/ENSG00000138119/ENSG00000134853	3	MSX1/MYOF/PDGFRA
GO:0048511	rhythmic process	0.209855	0.168988	ENSG00000179094/ENSG00000170961/ENSG00000134853	3	PER1/HAS2/PDGFRA
GO:0009581	detection of external stimulus	0.209855	0.168988	ENSG00000135919/ENSG00000103241	2	SERPINE2/FOXF1
GO:0009855	determination of bilateral symmetry	0.209855	0.168988	ENSG00000164458/ENSG00000103241	2	TBXT/FOXF1
GO:0009799	specification of symmetry	0.209855	0.168988	ENSG00000164458/ENSG00000103241	2	TBXT/FOXF1
GO:0006833	water transport	0.209855	0.168988	ENSG00000170961	1	HAS2
GO:0007350	blastoderm segmentation	0.209855	0.168988	ENSG00000164458	1	TBXT
GO:0007625	grooming behavior	0.209855	0.168988	ENSG00000165300	1	SLITRK5
GO:0030903	notochord development	0.209855	0.168988	ENSG00000164458	1	TBXT
GO:0030949	positive regulation of vascular endothelial growth factor receptor signaling pathway	0.209855	0.168988	ENSG00000102678	1	FGF9
GO:0035089	establishment of apical/basal cell polarity	0.209855	0.168988	ENSG00000103241	1	FOXF1
GO:0036166	phenotypic switching	0.209855	0.168988	ENSG00000102678	1	FGF9
GO:0042368	vitamin D biosynthetic process	0.209855	0.168988	ENSG00000019549	1	SNAI2
GO:0051767	nitric-oxide synthase biosynthetic process	0.209855	0.168988	ENSG00000131016	1	AKAP12
GO:0051769	regulation of nitric-oxide synthase biosynthetic process	0.209855	0.168988	ENSG00000131016	1	AKAP12
GO:0060973	cell migration involved in heart development	0.209855	0.168988	ENSG00000019549	1	SNAI2
GO:0070932	histone H3 deacetylation	0.209855	0.168988	ENSG00000179094	1	PER1
GO:1990182	exosomal secretion	0.209855	0.168988	ENSG00000069974	1	RAB27A
GO:2000678	negative regulation of transcription regulatory region DNA binding	0.209855	0.168988	ENSG00000163132	1	MSX1
GO:0007620	copulation	0.213978	0.172309	ENSG00000135919	1	SERPINE2
GO:0010738	regulation of protein kinase A signaling	0.213978	0.172309	ENSG00000131016	1	AKAP12
GO:0019400	alditol metabolic process	0.213978	0.172309	ENSG00000138119	1	MYOF
GO:0030656	regulation of vitamin metabolic process	0.213978	0.172309	ENSG00000019549	1	SNAI2
GO:0030859	polarized epithelial cell differentiation	0.213978	0.172309	ENSG00000103241	1	FOXF1
GO:0030878	thyroid gland development	0.213978	0.172309	ENSG00000128652	1	HOXD3
GO:0032402	melanosome transport	0.213978	0.172309	ENSG00000069974	1	RAB27A
GO:0043301	negative regulation of leukocyte degranulation	0.213978	0.172309	ENSG00000103241	1	FOXF1
GO:0045061	thymic T cell selection	0.213978	0.172309	ENSG00000184916	1	JAG2
GO:0051446	positive regulation of meiotic cell cycle	0.213978	0.172309	ENSG00000163132	1	MSX1
GO:0097734	extracellular exosome biogenesis	0.213978	0.172309	ENSG00000069974	1	RAB27A
GO:0007156	homophilic cell adhesion via plasma membrane adhesion molecules	0.214227	0.172509	ENSG00000156453/ENSG00000189184	2	PCDH1/PCDH18
GO:0051101	regulation of DNA binding	0.214989	0.173122	ENSG00000164104/ENSG00000163132	2	HMGB2/MSX1
GO:0014066	regulation of phosphatidylinositol 3-kinase signaling	0.214989	0.173122	ENSG00000135919/ENSG00000134853	2	SERPINE2/PDGFRA
GO:0042770	signal transduction in response to DNA damage	0.214989	0.173122	ENSG00000163132/ENSG00000019549	2	MSX1/SNAI2
GO:0034330	cell junction organization	0.214989	0.173122	ENSG00000129474/ENSG00000139880/ENSG00000019549	3	AJUBA/CDH24/SNAI2
GO:0002029	desensitization of G protein-coupled receptor signaling pathway	0.214989	0.173122	ENSG00000134817	1	APLNR
GO:0007063	regulation of sister chromatid cohesion	0.214989	0.173122	ENSG00000168646	1	AXIN2
GO:0007289	spermatid nucleus differentiation	0.214989	0.173122	ENSG00000164104	1	HMGB2
GO:0021756	striatum development	0.214989	0.173122	ENSG00000165300	1	SLITRK5
GO:0022401	negative adaptation of signaling pathway	0.214989	0.173122	ENSG00000134817	1	APLNR
GO:0032401	establishment of melanosome localization	0.214989	0.173122	ENSG00000069974	1	RAB27A
GO:0036120	cellular response to platelet-derived growth factor stimulus	0.214989	0.173122	ENSG00000170961	1	HAS2
GO:0051904	pigment granule transport	0.214989	0.173122	ENSG00000069974	1	RAB27A
GO:0061162	establishment of monopolar cell polarity	0.214989	0.173122	ENSG00000103241	1	FOXF1
GO:0071498	cellular response to fluid shear stress	0.214989	0.173122	ENSG00000170961	1	HAS2
GO:1901798	positive regulation of signal transduction by p53 class mediator	0.214989	0.173122	ENSG00000163132	1	MSX1
GO:0007162	negative regulation of cell adhesion	0.215462	0.173503	ENSG00000173406/ENSG00000135919/ENSG00000019549	3	DAB1/SERPINE2/SNAI2
GO:0030509	BMP signaling pathway	0.217527	0.175166	ENSG00000164458/ENSG00000163132	2	TBXT/MSX1
GO:0072001	renal system development	0.217527	0.175166	ENSG00000170961/ENSG00000134853/ENSG00000103241	3	HAS2/PDGFRA/FOXF1
GO:0009648	photoperiodism	0.217527	0.175166	ENSG00000179094	1	PER1
GO:0036119	response to platelet-derived growth factor	0.217527	0.175166	ENSG00000170961	1	HAS2
GO:0042362	fat-soluble vitamin biosynthetic process	0.217527	0.175166	ENSG00000019549	1	SNAI2
GO:0042535	positive regulation of tumor necrosis factor biosynthetic process	0.217527	0.175166	ENSG00000131016	1	AKAP12
GO:0051546	keratinocyte migration	0.217527	0.175166	ENSG00000170961	1	HAS2
GO:0051905	establishment of pigment granule localization	0.217527	0.175166	ENSG00000069974	1	RAB27A
GO:0061339	establishment or maintenance of monopolar cell polarity	0.217527	0.175166	ENSG00000103241	1	FOXF1
GO:0071711	basement membrane organization	0.217527	0.175166	ENSG00000087303	1	NID2
GO:0140112	extracellular vesicle biogenesis	0.217527	0.175166	ENSG00000069974	1	RAB27A
GO:2000050	regulation of non-canonical Wnt signaling pathway	0.217527	0.175166	ENSG00000171843	1	MLLT3
GO:0010977	negative regulation of neuron projection development	0.218807	0.176198	ENSG00000173406/ENSG00000149922	2	DAB1/TBX6
GO:0048813	dendrite morphogenesis	0.218807	0.176198	ENSG00000169439/ENSG00000165300	2	SDC2/SLITRK5
GO:0007530	sex determination	0.218807	0.176198	ENSG00000102678	1	FGF9
GO:0008045	motor neuron axon guidance	0.218807	0.176198	ENSG00000105996	1	HOXA2
GO:0023058	adaptation of signaling pathway	0.218807	0.176198	ENSG00000134817	1	APLNR
GO:0030318	melanocyte differentiation	0.218807	0.176198	ENSG00000069974	1	RAB27A
GO:0031639	plasminogen activation	0.218807	0.176198	ENSG00000135919	1	SERPINE2
GO:0032069	regulation of nuclease activity	0.218807	0.176198	ENSG00000164104	1	HMGB2
GO:0048711	positive regulation of astrocyte differentiation	0.218807	0.176198	ENSG00000135919	1	SERPINE2
GO:0051151	negative regulation of smooth muscle cell differentiation	0.218807	0.176198	ENSG00000102678	1	FGF9
GO:0071305	cellular response to vitamin D	0.218807	0.176198	ENSG00000019549	1	SNAI2
GO:0071985	multivesicular body sorting pathway	0.218807	0.176198	ENSG00000069974	1	RAB27A
GO:1903589	positive regulation of blood vessel endothelial cell proliferation involved in sprouting angiogenesis	0.218807	0.176198	ENSG00000134817	1	APLNR
GO:2000637	positive regulation of gene silencing by miRNA	0.218807	0.176198	ENSG00000129474	1	AJUBA
GO:2000773	negative regulation of cellular senescence	0.218807	0.176198	ENSG00000080839	1	RBL1
GO:0030534	adult behavior	0.218945	0.176308	ENSG00000173406/ENSG00000165300	2	DAB1/SLITRK5
GO:0034332	adherens junction organization	0.218945	0.176308	ENSG00000129474/ENSG00000139880	2	AJUBA/CDH24
GO:0006309	apoptotic DNA fragmentation	0.218945	0.176308	ENSG00000164104	1	HMGB2
GO:0007617	mating behavior	0.218945	0.176308	ENSG00000135919	1	SERPINE2
GO:0009649	entrainment of circadian clock	0.218945	0.176308	ENSG00000179094	1	PER1
GO:0010002	cardioblast differentiation	0.218945	0.176308	ENSG00000164458	1	TBXT
GO:0030539	male genitalia development	0.218945	0.176308	ENSG00000134853	1	PDGFRA
GO:0032400	melanosome localization	0.218945	0.176308	ENSG00000069974	1	RAB27A
GO:0042481	regulation of odontogenesis	0.218945	0.176308	ENSG00000163132	1	MSX1
GO:0060148	positive regulation of posttranscriptional gene silencing	0.218945	0.176308	ENSG00000129474	1	AJUBA
GO:0060749	mammary gland alveolus development	0.218945	0.176308	ENSG00000103241	1	FOXF1
GO:0061377	mammary gland lobule development	0.218945	0.176308	ENSG00000103241	1	FOXF1
GO:0072012	glomerulus vasculature development	0.218945	0.176308	ENSG00000134853	1	PDGFRA
GO:0090103	cochlea morphogenesis	0.218945	0.176308	ENSG00000105991	1	HOXA1
GO:1903429	regulation of cell maturation	0.218945	0.176308	ENSG00000149922	1	TBX6
GO:2000209	regulation of anoikis	0.218945	0.176308	ENSG00000019549	1	SNAI2
GO:2000291	regulation of myoblast proliferation	0.218945	0.176308	ENSG00000134138	1	MEIS2
GO:1903305	regulation of regulated secretory pathway	0.223967	0.180353	ENSG00000069974/ENSG00000103241	2	RAB27A/FOXF1
GO:0030325	adrenal gland development	0.223967	0.180353	ENSG00000134853	1	PDGFRA
GO:0035809	regulation of urine volume	0.223967	0.180353	ENSG00000170961	1	HAS2
GO:0043951	negative regulation of cAMP-mediated signaling	0.223967	0.180353	ENSG00000134817	1	APLNR
GO:0051875	pigment granule localization	0.223967	0.180353	ENSG00000069974	1	RAB27A
GO:0009416	response to light stimulus	0.223967	0.180353	ENSG00000105991/ENSG00000179094/ENSG00000134138	3	HOXA1/PER1/MEIS2
GO:0014013	regulation of gliogenesis	0.223967	0.180353	ENSG00000173406/ENSG00000135919	2	DAB1/SERPINE2
GO:0035148	tube formation	0.223967	0.180353	ENSG00000105991/ENSG00000164458	2	HOXA1/TBXT
GO:0071772	response to BMP	0.223967	0.180353	ENSG00000164458/ENSG00000163132	2	TBXT/MSX1
GO:0071773	cellular response to BMP stimulus	0.223967	0.180353	ENSG00000164458/ENSG00000163132	2	TBXT/MSX1
GO:0001702	gastrulation with mouth forming second	0.223967	0.180353	ENSG00000164458	1	TBXT
GO:0031954	positive regulation of protein autophosphorylation	0.223967	0.180353	ENSG00000181467	1	RAP2B
GO:0032104	regulation of response to extracellular stimulus	0.223967	0.180353	ENSG00000019549	1	SNAI2
GO:0032107	regulation of response to nutrient levels	0.223967	0.180353	ENSG00000019549	1	SNAI2
GO:0034110	regulation of homotypic cell-cell adhesion	0.223967	0.180353	ENSG00000135919	1	SERPINE2
GO:0042044	fluid transport	0.223967	0.180353	ENSG00000170961	1	HAS2
GO:0046426	negative regulation of JAK-STAT cascade	0.223967	0.180353	ENSG00000173406	1	DAB1
GO:0050919	negative chemotaxis	0.223967	0.180353	ENSG00000182168	1	UNC5C
GO:0060351	cartilage development involved in endochondral bone morphogenesis	0.223967	0.180353	ENSG00000168646	1	AXIN2
GO:0060914	heart formation	0.223967	0.180353	ENSG00000168646	1	AXIN2
GO:0061437	renal system vasculature development	0.223967	0.180353	ENSG00000134853	1	PDGFRA
GO:0061440	kidney vasculature development	0.223967	0.180353	ENSG00000134853	1	PDGFRA
GO:1904469	positive regulation of tumor necrosis factor secretion	0.223967	0.180353	ENSG00000131016	1	AKAP12
GO:1904754	positive regulation of vascular associated smooth muscle cell migration	0.223967	0.180353	ENSG00000102678	1	FGF9
GO:0016331	morphogenesis of embryonic epithelium	0.224894	0.181099	ENSG00000184916/ENSG00000164458	2	JAG2/TBXT
GO:0030879	mammary gland development	0.226425	0.182331	ENSG00000163132/ENSG00000103241	2	MSX1/FOXF1
GO:0090263	positive regulation of canonical Wnt signaling pathway	0.226425	0.182331	ENSG00000168646/ENSG00000102678	2	AXIN2/FGF9
GO:0002063	chondrocyte development	0.228217	0.183774	ENSG00000168646	1	AXIN2
GO:0006298	mismatch repair	0.228217	0.183774	ENSG00000168646	1	AXIN2
GO:0021544	subpallium development	0.228217	0.183774	ENSG00000165300	1	SLITRK5
GO:0043304	regulation of mast cell degranulation	0.228217	0.183774	ENSG00000103241	1	FOXF1
GO:0060561	apoptotic process involved in morphogenesis	0.228217	0.183774	ENSG00000184916	1	JAG2
GO:0014065	phosphatidylinositol 3-kinase signaling	0.230291	0.185444	ENSG00000135919/ENSG00000134853	2	SERPINE2/PDGFRA
GO:0055002	striated muscle cell development	0.230291	0.185444	ENSG00000138119/ENSG00000134853	2	MYOF/PDGFRA
GO:0016573	histone acetylation	0.230291	0.185444	ENSG00000179094/ENSG00000019549	2	PER1/SNAI2
GO:0000188	inactivation of MAPK activity	0.230291	0.185444	ENSG00000164086	1	DUSP7
GO:0007628	adult walking behavior	0.230291	0.185444	ENSG00000173406	1	DAB1
GO:0010894	negative regulation of steroid biosynthetic process	0.230291	0.185444	ENSG00000019549	1	SNAI2
GO:0016339	calcium-dependent cell-cell adhesion via plasma membrane cell adhesion molecules	0.230291	0.185444	ENSG00000129474	1	AJUBA
GO:0035116	embryonic hindlimb morphogenesis	0.230291	0.185444	ENSG00000163132	1	MSX1
GO:0045686	negative regulation of glial cell differentiation	0.230291	0.185444	ENSG00000173406	1	DAB1
GO:0050974	detection of mechanical stimulus involved in sensory perception	0.230291	0.185444	ENSG00000135919	1	SERPINE2
GO:0051450	myoblast proliferation	0.230291	0.185444	ENSG00000134138	1	MEIS2
GO:1901673	regulation of mitotic spindle assembly	0.230291	0.185444	ENSG00000118007	1	STAG1
GO:0001655	urogenital system development	0.230291	0.185444	ENSG00000170961/ENSG00000134853/ENSG00000103241	3	HAS2/PDGFRA/FOXF1
GO:0001738	morphogenesis of a polarized epithelium	0.234251	0.188634	ENSG00000171843/ENSG00000103241	2	MLLT3/FOXF1
GO:0003180	aortic valve morphogenesis	0.234251	0.188634	ENSG00000019549	1	SNAI2
GO:0009110	vitamin biosynthetic process	0.234251	0.188634	ENSG00000019549	1	SNAI2
GO:0018146	keratan sulfate biosynthetic process	0.234251	0.188634	ENSG00000175040	1	CHST2
GO:0033006	regulation of mast cell activation involved in immune response	0.234251	0.188634	ENSG00000103241	1	FOXF1
GO:0035066	positive regulation of histone acetylation	0.234251	0.188634	ENSG00000019549	1	SNAI2
GO:0042359	vitamin D metabolic process	0.234251	0.188634	ENSG00000019549	1	SNAI2
GO:0003016	respiratory system process	0.236569	0.1905	ENSG00000184916	1	JAG2
GO:0006929	substrate-dependent cell migration	0.236569	0.1905	ENSG00000019549	1	SNAI2
GO:0008210	estrogen metabolic process	0.236569	0.1905	ENSG00000134853	1	PDGFRA
GO:0010737	protein kinase A signaling	0.236569	0.1905	ENSG00000131016	1	AKAP12
GO:0040020	regulation of meiotic nuclear division	0.236569	0.1905	ENSG00000163132	1	MSX1
GO:0045939	negative regulation of steroid metabolic process	0.236569	0.1905	ENSG00000019549	1	SNAI2
GO:0062009	secondary palate development	0.236569	0.1905	ENSG00000184916	1	JAG2
GO:0070306	lens fiber cell differentiation	0.236569	0.1905	ENSG00000111186	1	WNT5B
GO:0090162	establishment of epithelial cell polarity	0.236569	0.1905	ENSG00000103241	1	FOXF1
GO:0090659	walking behavior	0.236569	0.1905	ENSG00000173406	1	DAB1
GO:1903306	negative regulation of regulated secretory pathway	0.236569	0.1905	ENSG00000103241	1	FOXF1
GO:2001236	regulation of extrinsic apoptotic signaling pathway	0.238005	0.191657	ENSG00000164104/ENSG00000019549	2	HMGB2/SNAI2
GO:0035051	cardiocyte differentiation	0.239241	0.192652	ENSG00000164458/ENSG00000134853	2	TBXT/PDGFRA
GO:0000737	DNA catabolic process, endonucleolytic	0.239241	0.192652	ENSG00000164104	1	HMGB2
GO:0019098	reproductive behavior	0.239241	0.192652	ENSG00000135919	1	SERPINE2
GO:0032925	regulation of activin receptor signaling pathway	0.239241	0.192652	ENSG00000102678	1	FGF9
GO:0045197	establishment or maintenance of epithelial cell apical/basal polarity	0.239241	0.192652	ENSG00000103241	1	FOXF1
GO:0046629	gamma-delta T cell activation	0.239241	0.192652	ENSG00000184916	1	JAG2
GO:0060445	branching involved in salivary gland morphogenesis	0.239241	0.192652	ENSG00000019549	1	SNAI2
GO:0090344	negative regulation of cell aging	0.239241	0.192652	ENSG00000080839	1	RBL1
GO:2000810	regulation of bicellular tight junction assembly	0.239241	0.192652	ENSG00000019549	1	SNAI2
GO:0031345	negative regulation of cell projection organization	0.242261	0.195084	ENSG00000173406/ENSG00000149922	2	DAB1/TBX6
GO:0021696	cerebellar cortex morphogenesis	0.242261	0.195084	ENSG00000135919	1	SERPINE2
GO:0042491	inner ear auditory receptor cell differentiation	0.242261	0.195084	ENSG00000184916	1	JAG2
GO:0043552	positive regulation of phosphatidylinositol 3-kinase activity	0.242261	0.195084	ENSG00000134853	1	PDGFRA
GO:0045880	positive regulation of smoothened signaling pathway	0.242261	0.195084	ENSG00000102678	1	FGF9
GO:0071295	cellular response to vitamin	0.242261	0.195084	ENSG00000019549	1	SNAI2
GO:1904893	negative regulation of STAT cascade	0.242261	0.195084	ENSG00000173406	1	DAB1
GO:1905063	regulation of vascular smooth muscle cell differentiation	0.242261	0.195084	ENSG00000102678	1	FGF9
GO:2000758	positive regulation of peptidyl-lysine acetylation	0.242261	0.195084	ENSG00000019549	1	SNAI2
GO:0055001	muscle cell development	0.24334	0.195953	ENSG00000138119/ENSG00000134853	2	MYOF/PDGFRA
GO:0003176	aortic valve development	0.24563	0.197797	ENSG00000019549	1	SNAI2
GO:0010092	specification of animal organ identity	0.24563	0.197797	ENSG00000168646	1	AXIN2
GO:0030262	apoptotic nuclear changes	0.24563	0.197797	ENSG00000164104	1	HMGB2
GO:0030513	positive regulation of BMP signaling pathway	0.24563	0.197797	ENSG00000163132	1	MSX1
GO:0036257	multivesicular body organization	0.24563	0.197797	ENSG00000069974	1	RAB27A
GO:0050931	pigment cell differentiation	0.24563	0.197797	ENSG00000069974	1	RAB27A
GO:1902230	negative regulation of intrinsic apoptotic signaling pathway in response to DNA damage	0.24563	0.197797	ENSG00000019549	1	SNAI2
GO:0018393	internal peptidyl-lysine acetylation	0.246193	0.19825	ENSG00000179094/ENSG00000019549	2	PER1/SNAI2
GO:2001242	regulation of intrinsic apoptotic signaling pathway	0.246193	0.19825	ENSG00000163132/ENSG00000019549	2	MSX1/SNAI2
GO:0051302	regulation of cell division	0.246998	0.198899	ENSG00000080839/ENSG00000102678	2	RBL1/FGF9
GO:0006040	amino sugar metabolic process	0.246998	0.198899	ENSG00000175040	1	CHST2
GO:0021801	cerebral cortex radial glia guided migration	0.246998	0.198899	ENSG00000173406	1	DAB1
GO:0022030	telencephalon glial cell migration	0.246998	0.198899	ENSG00000173406	1	DAB1
GO:0033363	secretory granule organization	0.246998	0.198899	ENSG00000135919	1	SERPINE2
GO:0042339	keratan sulfate metabolic process	0.246998	0.198899	ENSG00000175040	1	CHST2
GO:0043276	anoikis	0.246998	0.198899	ENSG00000019549	1	SNAI2
GO:0045879	negative regulation of smoothened signaling pathway	0.246998	0.198899	ENSG00000135919	1	SERPINE2
GO:0050690	regulation of defense response to virus by virus	0.246998	0.198899	ENSG00000182287	1	AP1S2
GO:1902253	regulation of intrinsic apoptotic signaling pathway by p53 class mediator	0.246998	0.198899	ENSG00000163132	1	MSX1
GO:0001936	regulation of endothelial cell proliferation	0.249501	0.200914	ENSG00000164104/ENSG00000134817	2	HMGB2/APLNR
GO:0090130	tissue migration	0.249501	0.200914	ENSG00000164458/ENSG00000170961/ENSG00000103241	3	TBXT/HAS2/FOXF1
GO:0006921	cellular component disassembly involved in execution phase of apoptosis	0.249501	0.200914	ENSG00000164104	1	HMGB2
GO:0035115	embryonic forelimb morphogenesis	0.249501	0.200914	ENSG00000163132	1	MSX1
GO:0042634	regulation of hair cycle	0.249501	0.200914	ENSG00000179094	1	PER1
GO:1902742	apoptotic process involved in development	0.249501	0.200914	ENSG00000184916	1	JAG2
GO:2000249	regulation of actin cytoskeleton reorganization	0.249501	0.200914	ENSG00000134853	1	PDGFRA
GO:0048015	phosphatidylinositol-mediated signaling	0.249501	0.200914	ENSG00000135919/ENSG00000134853	2	SERPINE2/PDGFRA
GO:0006475	internal protein amino acid acetylation	0.249501	0.200914	ENSG00000179094/ENSG00000019549	2	PER1/SNAI2
GO:0018394	peptidyl-lysine acetylation	0.249501	0.200914	ENSG00000179094/ENSG00000019549	2	PER1/SNAI2
GO:0051897	positive regulation of protein kinase B signaling	0.249501	0.200914	ENSG00000134853/ENSG00000102678	2	PDGFRA/FGF9
GO:0006308	DNA catabolic process	0.249501	0.200914	ENSG00000164104	1	HMGB2
GO:0007528	neuromuscular junction development	0.249501	0.200914	ENSG00000152818	1	UTRN
GO:0010762	regulation of fibroblast migration	0.249501	0.200914	ENSG00000131016	1	AKAP12
GO:0033144	negative regulation of intracellular steroid hormone receptor signaling pathway	0.249501	0.200914	ENSG00000179094	1	PER1
GO:0035088	establishment or maintenance of apical/basal cell polarity	0.249501	0.200914	ENSG00000103241	1	FOXF1
GO:0048255	mRNA stabilization	0.249501	0.200914	ENSG00000168646	1	AXIN2
GO:0050982	detection of mechanical stimulus	0.249501	0.200914	ENSG00000135919	1	SERPINE2
GO:0061245	establishment or maintenance of bipolar cell polarity	0.249501	0.200914	ENSG00000103241	1	FOXF1
GO:0085029	extracellular matrix assembly	0.249501	0.200914	ENSG00000170961	1	HAS2
GO:0090169	regulation of spindle assembly	0.249501	0.200914	ENSG00000118007	1	STAG1
GO:0090218	positive regulation of lipid kinase activity	0.249501	0.200914	ENSG00000134853	1	PDGFRA
GO:1900026	positive regulation of substrate adhesion-dependent cell spreading	0.249501	0.200914	ENSG00000170961	1	HAS2
GO:1901797	negative regulation of signal transduction by p53 class mediator	0.249501	0.200914	ENSG00000019549	1	SNAI2
GO:0048017	inositol lipid-mediated signaling	0.250413	0.201648	ENSG00000135919/ENSG00000134853	2	SERPINE2/PDGFRA
GO:0051783	regulation of nuclear division	0.250413	0.201648	ENSG00000118007/ENSG00000163132	2	STAG1/MSX1
GO:0043409	negative regulation of MAPK cascade	0.252229	0.203111	ENSG00000164086/ENSG00000179094	2	DUSP7/PER1
GO:0010256	endomembrane system organization	0.252429	0.203272	ENSG00000069974/ENSG00000135919/ENSG00000138119	3	RAB27A/SERPINE2/MYOF
GO:0030212	hyaluronan metabolic process	0.252429	0.203272	ENSG00000170961	1	HAS2
GO:0060441	epithelial tube branching involved in lung morphogenesis	0.252429	0.203272	ENSG00000103241	1	FOXF1
GO:0070528	protein kinase C signaling	0.252429	0.203272	ENSG00000131016	1	AKAP12
GO:1904467	regulation of tumor necrosis factor secretion	0.252429	0.203272	ENSG00000131016	1	AKAP12
GO:0003091	renal water homeostasis	0.254055	0.204581	ENSG00000170961	1	HAS2
GO:0032728	positive regulation of interferon-beta production	0.254055	0.204581	ENSG00000164104	1	HMGB2
GO:0032885	regulation of polysaccharide biosynthetic process	0.254055	0.204581	ENSG00000170961	1	HAS2
GO:0033280	response to vitamin D	0.254055	0.204581	ENSG00000019549	1	SNAI2
GO:0034405	response to fluid shear stress	0.254055	0.204581	ENSG00000170961	1	HAS2
GO:0044319	wound healing, spreading of cells	0.254055	0.204581	ENSG00000129474	1	AJUBA
GO:0046329	negative regulation of JNK cascade	0.254055	0.204581	ENSG00000179094	1	PER1
GO:0090505	epiboly involved in wound healing	0.254055	0.204581	ENSG00000129474	1	AJUBA
GO:1902042	negative regulation of extrinsic apoptotic signaling pathway via death domain receptors	0.254055	0.204581	ENSG00000164104	1	HMGB2
GO:1905314	semi-lunar valve development	0.254055	0.204581	ENSG00000019549	1	SNAI2
GO:0071347	cellular response to interleukin-1	0.254055	0.204581	ENSG00000131016/ENSG00000170961	2	AKAP12/HAS2
GO:0030308	negative regulation of cell growth	0.255839	0.206018	ENSG00000135919/ENSG00000163132	2	SERPINE2/MSX1
GO:0033003	regulation of mast cell activation	0.256656	0.206676	ENSG00000103241	1	FOXF1
GO:0035137	hindlimb morphogenesis	0.256656	0.206676	ENSG00000163132	1	MSX1
GO:0042533	tumor necrosis factor biosynthetic process	0.256656	0.206676	ENSG00000131016	1	AKAP12
GO:0042534	regulation of tumor necrosis factor biosynthetic process	0.256656	0.206676	ENSG00000131016	1	AKAP12
GO:0045920	negative regulation of exocytosis	0.256656	0.206676	ENSG00000103241	1	FOXF1
GO:0060045	positive regulation of cardiac muscle cell proliferation	0.256656	0.206676	ENSG00000102678	1	FGF9
GO:0090504	epiboly	0.256656	0.206676	ENSG00000129474	1	AJUBA
GO:0001935	endothelial cell proliferation	0.260184	0.209516	ENSG00000164104/ENSG00000134817	2	HMGB2/APLNR
GO:0043114	regulation of vascular permeability	0.260184	0.209516	ENSG00000131016	1	AKAP12
GO:0045648	positive regulation of erythrocyte differentiation	0.260184	0.209516	ENSG00000164104	1	HMGB2
GO:0048286	lung alveolus development	0.260184	0.209516	ENSG00000103241	1	FOXF1
GO:0051281	positive regulation of release of sequestered calcium ion into cytosol	0.260184	0.209516	ENSG00000134817	1	APLNR
GO:1990774	tumor necrosis factor secretion	0.260184	0.209516	ENSG00000131016	1	AKAP12
GO:0048660	regulation of smooth muscle cell proliferation	0.262902	0.211705	ENSG00000102678/ENSG00000104415	2	FGF9/CCN4
GO:0043433	negative regulation of DNA-binding transcription factor activity	0.264068	0.212644	ENSG00000164458/ENSG00000149922	2	TBXT/TBX6
GO:0021799	cerebral cortex radially oriented cell migration	0.264068	0.212644	ENSG00000173406	1	DAB1
GO:0035329	hippo signaling	0.264068	0.212644	ENSG00000129474	1	AJUBA
GO:1902229	regulation of intrinsic apoptotic signaling pathway in response to DNA damage	0.264068	0.212644	ENSG00000019549	1	SNAI2
GO:0030900	forebrain development	0.264144	0.212705	ENSG00000173406/ENSG00000165300/ENSG00000163132	3	DAB1/SLITRK5/MSX1
GO:0022408	negative regulation of cell-cell adhesion	0.264183	0.212736	ENSG00000135919/ENSG00000019549	2	SERPINE2/SNAI2
GO:0048659	smooth muscle cell proliferation	0.264183	0.212736	ENSG00000102678/ENSG00000104415	2	FGF9/CCN4
GO:1901796	regulation of signal transduction by p53 class mediator	0.26593	0.214143	ENSG00000163132/ENSG00000019549	2	MSX1/SNAI2
GO:0007435	salivary gland morphogenesis	0.266087	0.21427	ENSG00000019549	1	SNAI2
GO:0009954	proximal/distal pattern formation	0.266087	0.21427	ENSG00000164651	1	SP8
GO:0038084	vascular endothelial growth factor signaling pathway	0.266087	0.21427	ENSG00000134853	1	PDGFRA
GO:0048333	mesodermal cell differentiation	0.266087	0.21427	ENSG00000103241	1	FOXF1
GO:1901985	positive regulation of protein acetylation	0.266087	0.21427	ENSG00000019549	1	SNAI2
GO:0017157	regulation of exocytosis	0.267994	0.215806	ENSG00000069974/ENSG00000103241	2	RAB27A/FOXF1
GO:0007409	axonogenesis	0.267994	0.215806	ENSG00000173406/ENSG00000105996/ENSG00000182168	3	DAB1/HOXA2/UNC5C
GO:0010863	positive regulation of phospholipase C activity	0.267994	0.215806	ENSG00000134853	1	PDGFRA
GO:0035886	vascular smooth muscle cell differentiation	0.267994	0.215806	ENSG00000102678	1	FGF9
GO:0043489	RNA stabilization	0.267994	0.215806	ENSG00000168646	1	AXIN2
GO:0048066	developmental pigmentation	0.267994	0.215806	ENSG00000069974	1	RAB27A
GO:0071364	cellular response to epidermal growth factor stimulus	0.267994	0.215806	ENSG00000019549	1	SNAI2
GO:1902373	negative regulation of mRNA catabolic process	0.267994	0.215806	ENSG00000168646	1	AXIN2
GO:2000649	regulation of sodium ion transmembrane transporter activity	0.267994	0.215806	ENSG00000152818	1	UTRN
GO:0009612	response to mechanical stimulus	0.267994	0.215806	ENSG00000135919/ENSG00000134138	2	SERPINE2/MEIS2
GO:0019216	regulation of lipid metabolic process	0.270776	0.218046	ENSG00000080839/ENSG00000134853/ENSG00000019549	3	RBL1/PDGFRA/SNAI2
GO:0010761	fibroblast migration	0.270776	0.218046	ENSG00000131016	1	AKAP12
GO:0031952	regulation of protein autophosphorylation	0.270776	0.218046	ENSG00000181467	1	RAP2B
GO:0032881	regulation of polysaccharide metabolic process	0.270776	0.218046	ENSG00000170961	1	HAS2
GO:0043303	mast cell degranulation	0.270776	0.218046	ENSG00000103241	1	FOXF1
GO:0051445	regulation of meiotic cell cycle	0.270776	0.218046	ENSG00000163132	1	MSX1
GO:0061138	morphogenesis of a branching epithelium	0.273526	0.22026	ENSG00000103241/ENSG00000019549	2	FOXF1/SNAI2
GO:0021983	pituitary gland development	0.273882	0.220547	ENSG00000163132	1	MSX1
GO:0022602	ovulation cycle process	0.273882	0.220547	ENSG00000134853	1	PDGFRA
GO:0051154	negative regulation of striated muscle cell differentiation	0.273882	0.220547	ENSG00000163132	1	MSX1
GO:0060236	regulation of mitotic spindle organization	0.273882	0.220547	ENSG00000118007	1	STAG1
GO:1900274	regulation of phospholipase C activity	0.273882	0.220547	ENSG00000134853	1	PDGFRA
GO:0002279	mast cell activation involved in immune response	0.276035	0.222281	ENSG00000103241	1	FOXF1
GO:0002448	mast cell mediated immunity	0.276035	0.222281	ENSG00000103241	1	FOXF1
GO:0007431	salivary gland development	0.276035	0.222281	ENSG00000019549	1	SNAI2
GO:0035136	forelimb morphogenesis	0.276035	0.222281	ENSG00000163132	1	MSX1
GO:1901099	negative regulation of signal transduction in absence of ligand	0.276035	0.222281	ENSG00000019549	1	SNAI2
GO:1904738	vascular associated smooth muscle cell migration	0.276035	0.222281	ENSG00000102678	1	FGF9
GO:1904752	regulation of vascular associated smooth muscle cell migration	0.276035	0.222281	ENSG00000102678	1	FGF9
GO:2001240	negative regulation of extrinsic apoptotic signaling pathway in absence of ligand	0.276035	0.222281	ENSG00000019549	1	SNAI2
GO:0007520	myoblast fusion	0.276291	0.222487	ENSG00000138119	1	MYOF
GO:0007618	mating	0.276291	0.222487	ENSG00000135919	1	SERPINE2
GO:0021517	ventral spinal cord development	0.276291	0.222487	ENSG00000173406	1	DAB1
GO:0021762	substantia nigra development	0.276291	0.222487	ENSG00000102678	1	FGF9
GO:0032924	activin receptor signaling pathway	0.276291	0.222487	ENSG00000102678	1	FGF9
GO:0033059	cellular pigmentation	0.276291	0.222487	ENSG00000069974	1	RAB27A
GO:0033628	regulation of cell adhesion mediated by integrin	0.276291	0.222487	ENSG00000019549	1	SNAI2
GO:0035315	hair cell differentiation	0.276291	0.222487	ENSG00000184916	1	JAG2
GO:0043124	negative regulation of I-kappaB kinase/NF-kappaB signaling	0.276291	0.222487	ENSG00000179094	1	PER1
GO:0045058	T cell selection	0.276291	0.222487	ENSG00000184916	1	JAG2
GO:0070849	response to epidermal growth factor	0.276291	0.222487	ENSG00000019549	1	SNAI2
GO:1903053	regulation of extracellular matrix organization	0.276291	0.222487	ENSG00000170961	1	HAS2
GO:0070374	positive regulation of ERK1 and ERK2 cascade	0.276291	0.222487	ENSG00000131016/ENSG00000134853	2	AKAP12/PDGFRA
GO:0007517	muscle organ development	0.276291	0.222487	ENSG00000152818/ENSG00000163132/ENSG00000102678	3	UTRN/MSX1/FGF9
GO:0006473	protein acetylation	0.276291	0.222487	ENSG00000179094/ENSG00000019549	2	PER1/SNAI2
GO:0010955	negative regulation of protein processing	0.276291	0.222487	ENSG00000135919	1	SERPINE2
GO:0014014	negative regulation of gliogenesis	0.276291	0.222487	ENSG00000173406	1	DAB1
GO:0042551	neuron maturation	0.276291	0.222487	ENSG00000149922	1	TBX6
GO:0043392	negative regulation of DNA binding	0.276291	0.222487	ENSG00000163132	1	MSX1
GO:0048806	genitalia development	0.276291	0.222487	ENSG00000134853	1	PDGFRA
GO:0072210	metanephric nephron development	0.276291	0.222487	ENSG00000134853	1	PDGFRA
GO:0120163	negative regulation of cold-induced thermogenesis	0.276291	0.222487	ENSG00000140332	1	TLE3
GO:1903318	negative regulation of protein maturation	0.276291	0.222487	ENSG00000135919	1	SERPINE2
GO:1903587	regulation of blood vessel endothelial cell proliferation involved in sprouting angiogenesis	0.276291	0.222487	ENSG00000134817	1	APLNR
GO:1903727	positive regulation of phospholipid metabolic process	0.276291	0.222487	ENSG00000134853	1	PDGFRA
GO:0070555	response to interleukin-1	0.277715	0.223633	ENSG00000131016/ENSG00000170961	2	AKAP12/HAS2
GO:0021695	cerebellar cortex development	0.27995	0.225433	ENSG00000135919	1	SERPINE2
GO:0031638	zymogen activation	0.27995	0.225433	ENSG00000135919	1	SERPINE2
GO:0060395	SMAD protein signal transduction	0.27995	0.225433	ENSG00000164458	1	TBXT
GO:1905330	regulation of morphogenesis of an epithelium	0.280173	0.225613	ENSG00000171843/ENSG00000019549	2	MLLT3/SNAI2
GO:2001233	regulation of apoptotic signaling pathway	0.280173	0.225613	ENSG00000164104/ENSG00000163132/ENSG00000019549	3	HMGB2/MSX1/SNAI2
GO:0001763	morphogenesis of a branching structure	0.280173	0.225613	ENSG00000103241/ENSG00000019549	2	FOXF1/SNAI2
GO:0006775	fat-soluble vitamin metabolic process	0.280173	0.225613	ENSG00000019549	1	SNAI2
GO:0008542	visual learning	0.280173	0.225613	ENSG00000134138	1	MEIS2
GO:0032873	negative regulation of stress-activated MAPK cascade	0.280173	0.225613	ENSG00000179094	1	PER1
GO:0051602	response to electrical stimulus	0.280173	0.225613	ENSG00000131016	1	AKAP12
GO:0060976	coronary vasculature development	0.280173	0.225613	ENSG00000134817	1	APLNR
GO:0061912	selective autophagy	0.280173	0.225613	ENSG00000163625	1	WDFY3
GO:0070303	negative regulation of stress-activated protein kinase signaling cascade	0.280173	0.225613	ENSG00000179094	1	PER1
GO:0090102	cochlea development	0.280173	0.225613	ENSG00000105991	1	HOXA1
GO:0090224	regulation of spindle organization	0.280173	0.225613	ENSG00000118007	1	STAG1
GO:0007062	sister chromatid cohesion	0.282855	0.227773	ENSG00000168646	1	AXIN2
GO:0010718	positive regulation of epithelial to mesenchymal transition	0.282855	0.227773	ENSG00000168646	1	AXIN2
GO:0043300	regulation of leukocyte degranulation	0.282855	0.227773	ENSG00000103241	1	FOXF1
GO:0043949	regulation of cAMP-mediated signaling	0.282855	0.227773	ENSG00000134817	1	APLNR
GO:1902369	negative regulation of RNA catabolic process	0.282855	0.227773	ENSG00000168646	1	AXIN2
GO:2000677	regulation of transcription regulatory region DNA binding	0.282855	0.227773	ENSG00000163132	1	MSX1
GO:0030239	myofibril assembly	0.286313	0.230557	ENSG00000134853	1	PDGFRA
GO:0035065	regulation of histone acetylation	0.286313	0.230557	ENSG00000019549	1	SNAI2
GO:0048146	positive regulation of fibroblast proliferation	0.286313	0.230557	ENSG00000134853	1	PDGFRA
GO:0060350	endochondral bone morphogenesis	0.286313	0.230557	ENSG00000168646	1	AXIN2
GO:0046777	protein autophosphorylation	0.287145	0.231227	ENSG00000181467/ENSG00000134853	2	RAP2B/PDGFRA
GO:0001954	positive regulation of cell-matrix adhesion	0.288037	0.231945	ENSG00000152818	1	UTRN
GO:0003179	heart valve morphogenesis	0.288037	0.231945	ENSG00000019549	1	SNAI2
GO:0045687	positive regulation of glial cell differentiation	0.288037	0.231945	ENSG00000135919	1	SERPINE2
GO:0050771	negative regulation of axonogenesis	0.288037	0.231945	ENSG00000173406	1	DAB1
GO:1900024	regulation of substrate adhesion-dependent cell spreading	0.288037	0.231945	ENSG00000170961	1	HAS2
GO:1900744	regulation of p38MAPK cascade	0.288037	0.231945	ENSG00000179094	1	PER1
GO:1902305	regulation of sodium ion transmembrane transport	0.288037	0.231945	ENSG00000152818	1	UTRN
GO:0002043	blood vessel endothelial cell proliferation involved in sprouting angiogenesis	0.291376	0.234635	ENSG00000134817	1	APLNR
GO:0010524	positive regulation of calcium ion transport into cytosol	0.291376	0.234635	ENSG00000134817	1	APLNR
GO:0035094	response to nicotine	0.291376	0.234635	ENSG00000163132	1	MSX1
GO:0060563	neuroepithelial cell differentiation	0.291376	0.234635	ENSG00000184916	1	JAG2
GO:0010001	glial cell differentiation	0.292135	0.235245	ENSG00000173406/ENSG00000135919	2	DAB1/SERPINE2
GO:0021795	cerebral cortex cell migration	0.294242	0.236942	ENSG00000173406	1	DAB1
GO:0043551	regulation of phosphatidylinositol 3-kinase activity	0.294242	0.236942	ENSG00000134853	1	PDGFRA
GO:0048747	muscle fiber development	0.294242	0.236942	ENSG00000138119	1	MYOF
GO:1903307	positive regulation of regulated secretory pathway	0.294242	0.236942	ENSG00000069974	1	RAB27A
GO:0048738	cardiac muscle tissue development	0.296009	0.238366	ENSG00000134853/ENSG00000102678	2	PDGFRA/FGF9
GO:0001667	ameboidal-type cell migration	0.296212	0.238528	ENSG00000131016/ENSG00000164458/ENSG00000170961	3	AKAP12/TBXT/HAS2
GO:0022604	regulation of cell morphogenesis	0.296212	0.238528	ENSG00000173406/ENSG00000169439/ENSG00000170961	3	DAB1/SDC2/HAS2
GO:0061564	axon development	0.296212	0.238528	ENSG00000173406/ENSG00000105996/ENSG00000182168	3	DAB1/HOXA2/UNC5C
GO:0001709	cell fate determination	0.296212	0.238528	ENSG00000105996	1	HOXA2
GO:0055023	positive regulation of cardiac muscle tissue growth	0.296212	0.238528	ENSG00000102678	1	FGF9
GO:0060113	inner ear receptor cell differentiation	0.296212	0.238528	ENSG00000184916	1	JAG2
GO:0097191	extrinsic apoptotic signaling pathway	0.297028	0.239186	ENSG00000164104/ENSG00000019549	2	HMGB2/SNAI2
GO:0044706	multi-multicellular organism process	0.298584	0.240439	ENSG00000164458/ENSG00000135919	2	TBXT/SERPINE2
GO:0045744	negative regulation of G protein-coupled receptor signaling pathway	0.298874	0.240673	ENSG00000134817	1	APLNR
GO:0048008	platelet-derived growth factor receptor signaling pathway	0.298874	0.240673	ENSG00000134853	1	PDGFRA
GO:2001239	regulation of extrinsic apoptotic signaling pathway in absence of ligand	0.298874	0.240673	ENSG00000019549	1	SNAI2
GO:0034329	cell junction assembly	0.298874	0.240673	ENSG00000129474/ENSG00000019549	2	AJUBA/SNAI2
GO:0035272	exocrine system development	0.300413	0.241911	ENSG00000019549	1	SNAI2
GO:0045576	mast cell activation	0.300413	0.241911	ENSG00000103241	1	FOXF1
GO:0045646	regulation of erythrocyte differentiation	0.300413	0.241911	ENSG00000164104	1	HMGB2
GO:0051055	negative regulation of lipid biosynthetic process	0.300413	0.241911	ENSG00000019549	1	SNAI2
GO:0060425	lung morphogenesis	0.300413	0.241911	ENSG00000103241	1	FOXF1
GO:1902041	regulation of extrinsic apoptotic signaling pathway via death domain receptors	0.300413	0.241911	ENSG00000164104	1	HMGB2
GO:2000756	regulation of peptidyl-lysine acetylation	0.300413	0.241911	ENSG00000019549	1	SNAI2
GO:0043122	regulation of I-kappaB kinase/NF-kappaB signaling	0.301406	0.242711	ENSG00000179094/ENSG00000129474	2	PER1/AJUBA
GO:0045785	positive regulation of cell adhesion	0.303063	0.244045	ENSG00000152818/ENSG00000170961/ENSG00000103241	3	UTRN/HAS2/FOXF1
GO:0010518	positive regulation of phospholipase activity	0.303063	0.244045	ENSG00000134853	1	PDGFRA
GO:0038066	p38MAPK cascade	0.303063	0.244045	ENSG00000179094	1	PER1
GO:0060043	regulation of cardiac muscle cell proliferation	0.303063	0.244045	ENSG00000102678	1	FGF9
GO:0032648	regulation of interferon-beta production	0.304482	0.245188	ENSG00000164104	1	HMGB2
GO:0045599	negative regulation of fat cell differentiation	0.304482	0.245188	ENSG00000104415	1	CCN4
GO:0051966	regulation of synaptic transmission, glutamatergic	0.304482	0.245188	ENSG00000135919	1	SERPINE2
GO:0060421	positive regulation of heart growth	0.304482	0.245188	ENSG00000102678	1	FGF9
GO:0030099	myeloid cell differentiation	0.304482	0.245188	ENSG00000164104/ENSG00000134138/ENSG00000104415	3	HMGB2/MEIS2/CCN4
GO:0034504	protein localization to nucleus	0.304482	0.245188	ENSG00000163132/ENSG00000102678	2	MSX1/FGF9
GO:0010975	regulation of neuron projection development	0.304482	0.245188	ENSG00000173406/ENSG00000169439/ENSG00000149922	3	DAB1/SDC2/TBX6
GO:2001234	negative regulation of apoptotic signaling pathway	0.304482	0.245188	ENSG00000164104/ENSG00000019549	2	HMGB2/SNAI2
GO:0002011	morphogenesis of an epithelial sheet	0.304482	0.245188	ENSG00000129474	1	AJUBA
GO:0002562	somatic diversification of immune receptors via germline recombination within a single locus	0.304482	0.245188	ENSG00000164104	1	HMGB2
GO:0002886	regulation of myeloid leukocyte mediated immunity	0.304482	0.245188	ENSG00000103241	1	FOXF1
GO:0006027	glycosaminoglycan catabolic process	0.304482	0.245188	ENSG00000169439	1	SDC2
GO:0014032	neural crest cell development	0.304482	0.245188	ENSG00000019549	1	SNAI2
GO:0016444	somatic cell DNA recombination	0.304482	0.245188	ENSG00000164104	1	HMGB2
GO:0033692	cellular polysaccharide biosynthetic process	0.304482	0.245188	ENSG00000170961	1	HAS2
GO:0042733	embryonic digit morphogenesis	0.304482	0.245188	ENSG00000163132	1	MSX1
GO:0048645	animal organ formation	0.304482	0.245188	ENSG00000168646	1	AXIN2
GO:0090303	positive regulation of wound healing	0.304482	0.245188	ENSG00000104415	1	CCN4
GO:1900015	regulation of cytokine production involved in inflammatory response	0.304482	0.245188	ENSG00000179094	1	PER1
GO:0042326	negative regulation of phosphorylation	0.30555	0.246048	ENSG00000164086/ENSG00000179094/ENSG00000129474	3	DUSP7/PER1/AJUBA
GO:0022407	regulation of cell-cell adhesion	0.305927	0.246352	ENSG00000135919/ENSG00000170961/ENSG00000019549	3	SERPINE2/HAS2/SNAI2
GO:0032608	interferon-beta production	0.305927	0.246352	ENSG00000164104	1	HMGB2
GO:0032835	glomerulus development	0.305927	0.246352	ENSG00000134853	1	PDGFRA
GO:0032922	circadian regulation of gene expression	0.305927	0.246352	ENSG00000179094	1	PER1
GO:0043966	histone H3 acetylation	0.305927	0.246352	ENSG00000179094	1	PER1
GO:0045747	positive regulation of Notch signaling pathway	0.305927	0.246352	ENSG00000184916	1	JAG2
GO:1903531	negative regulation of secretion by cell	0.305927	0.246352	ENSG00000007384/ENSG00000103241	2	RHBDF1/FOXF1
GO:0003170	heart valve development	0.306989	0.247207	ENSG00000019549	1	SNAI2
GO:0006026	aminoglycan catabolic process	0.306989	0.247207	ENSG00000169439	1	SDC2
GO:0007585	respiratory gaseous exchange	0.306989	0.247207	ENSG00000184916	1	JAG2
GO:0016575	histone deacetylation	0.306989	0.247207	ENSG00000179094	1	PER1
GO:0033627	cell adhesion mediated by integrin	0.306989	0.247207	ENSG00000019549	1	SNAI2
GO:0051785	positive regulation of nuclear division	0.306989	0.247207	ENSG00000163132	1	MSX1
GO:1904707	positive regulation of vascular smooth muscle cell proliferation	0.306989	0.247207	ENSG00000102678	1	FGF9
GO:2000243	positive regulation of reproductive process	0.306989	0.247207	ENSG00000163132	1	MSX1
GO:0000768	syncytium formation by plasma membrane fusion	0.308586	0.248493	ENSG00000138119	1	MYOF
GO:0002437	inflammatory response to antigenic stimulus	0.308586	0.248493	ENSG00000164104	1	HMGB2
GO:0002534	cytokine production involved in inflammatory response	0.308586	0.248493	ENSG00000179094	1	PER1
GO:0030032	lamellipodium assembly	0.308586	0.248493	ENSG00000129474	1	AJUBA
GO:0043388	positive regulation of DNA binding	0.308586	0.248493	ENSG00000164104	1	HMGB2
GO:0140253	cell-cell fusion	0.308586	0.248493	ENSG00000138119	1	MYOF
GO:2001244	positive regulation of intrinsic apoptotic signaling pathway	0.308586	0.248493	ENSG00000163132	1	MSX1
GO:0043543	protein acylation	0.308849	0.248705	ENSG00000179094/ENSG00000019549	2	PER1/SNAI2
GO:0050769	positive regulation of neurogenesis	0.310074	0.249691	ENSG00000173406/ENSG00000135919/ENSG00000128652	3	DAB1/SERPINE2/HOXD3
GO:0008347	glial cell migration	0.310544	0.25007	ENSG00000173406	1	DAB1
GO:0014031	mesenchymal cell development	0.310544	0.25007	ENSG00000019549	1	SNAI2
GO:0070830	bicellular tight junction assembly	0.310544	0.25007	ENSG00000019549	1	SNAI2
GO:0090307	mitotic spindle assembly	0.310544	0.25007	ENSG00000118007	1	STAG1
GO:0051896	regulation of protein kinase B signaling	0.312862	0.251936	ENSG00000134853/ENSG00000102678	2	PDGFRA/FGF9
GO:0006949	syncytium formation	0.312862	0.251936	ENSG00000138119	1	MYOF
GO:0048663	neuron fate commitment	0.312862	0.251936	ENSG00000184916	1	JAG2
GO:0048864	stem cell development	0.312862	0.251936	ENSG00000019549	1	SNAI2
GO:0120192	tight junction assembly	0.312862	0.251936	ENSG00000019549	1	SNAI2
GO:0044262	cellular carbohydrate metabolic process	0.313704	0.252614	ENSG00000170961/ENSG00000138119	2	HAS2/MYOF
GO:0048857	neural nucleus development	0.315946	0.254419	ENSG00000102678	1	FGF9
GO:0061371	determination of heart left/right asymmetry	0.315946	0.254419	ENSG00000164458	1	TBXT
GO:0000271	polysaccharide biosynthetic process	0.316568	0.254921	ENSG00000170961	1	HAS2
GO:0002200	somatic diversification of immune receptors	0.316568	0.254921	ENSG00000164104	1	HMGB2
GO:0010517	regulation of phospholipase activity	0.316568	0.254921	ENSG00000134853	1	PDGFRA
GO:0022029	telencephalon cell migration	0.316568	0.254921	ENSG00000173406	1	DAB1
GO:0032387	negative regulation of intracellular transport	0.316568	0.254921	ENSG00000103241	1	FOXF1
GO:0035924	cellular response to vascular endothelial growth factor stimulus	0.316568	0.254921	ENSG00000134853	1	PDGFRA
GO:0042490	mechanoreceptor differentiation	0.316568	0.254921	ENSG00000184916	1	JAG2
GO:0043967	histone H4 acetylation	0.316568	0.254921	ENSG00000179094	1	PER1
GO:1903672	positive regulation of sprouting angiogenesis	0.316568	0.254921	ENSG00000134817	1	APLNR
GO:0007204	positive regulation of cytosolic calcium ion concentration	0.318066	0.256127	ENSG00000134853/ENSG00000134817	2	PDGFRA/APLNR
GO:0050707	regulation of cytokine secretion	0.319492	0.257275	ENSG00000131016/ENSG00000104415	2	AKAP12/CCN4
GO:0060038	cardiac muscle cell proliferation	0.319567	0.257336	ENSG00000102678	1	FGF9
GO:0033002	muscle cell proliferation	0.320108	0.257771	ENSG00000102678/ENSG00000104415	2	FGF9/CCN4
GO:0033673	negative regulation of kinase activity	0.320108	0.257771	ENSG00000164086/ENSG00000129474	2	DUSP7/AJUBA
GO:0001913	T cell mediated cytotoxicity	0.320917	0.258423	ENSG00000069974	1	RAB27A
GO:0002088	lens development in camera-type eye	0.320917	0.258423	ENSG00000111186	1	WNT5B
GO:0097194	execution phase of apoptosis	0.320917	0.258423	ENSG00000164104	1	HMGB2
GO:0120193	tight junction organization	0.320917	0.258423	ENSG00000019549	1	SNAI2
GO:1904427	positive regulation of calcium ion transmembrane transport	0.320917	0.258423	ENSG00000134817	1	APLNR
GO:0014033	neural crest cell differentiation	0.322632	0.259804	ENSG00000019549	1	SNAI2
GO:0021885	forebrain cell migration	0.322632	0.259804	ENSG00000173406	1	DAB1
GO:0032418	lysosome localization	0.322632	0.259804	ENSG00000103241	1	FOXF1
GO:0033045	regulation of sister chromatid segregation	0.322632	0.259804	ENSG00000168646	1	AXIN2
GO:0046622	positive regulation of organ growth	0.322632	0.259804	ENSG00000102678	1	FGF9
GO:0050891	multicellular organismal water homeostasis	0.322632	0.259804	ENSG00000170961	1	HAS2
GO:0007249	I-kappaB kinase/NF-kappaB signaling	0.323911	0.260834	ENSG00000179094/ENSG00000129474	2	PER1/AJUBA
GO:0031670	cellular response to nutrient	0.323911	0.260834	ENSG00000019549	1	SNAI2
GO:0035249	synaptic transmission, glutamatergic	0.323911	0.260834	ENSG00000135919	1	SERPINE2
GO:0055025	positive regulation of cardiac muscle tissue development	0.323911	0.260834	ENSG00000102678	1	FGF9
GO:0060688	regulation of morphogenesis of a branching structure	0.323911	0.260834	ENSG00000019549	1	SNAI2
GO:0071479	cellular response to ionizing radiation	0.323911	0.260834	ENSG00000019549	1	SNAI2
GO:1901983	regulation of protein acetylation	0.323911	0.260834	ENSG00000019549	1	SNAI2
GO:0051048	negative regulation of secretion	0.32476	0.261517	ENSG00000007384/ENSG00000103241	2	RHBDF1/FOXF1
GO:0021537	telencephalon development	0.32476	0.261517	ENSG00000173406/ENSG00000165300	2	DAB1/SLITRK5
GO:0033077	T cell differentiation in thymus	0.32476	0.261517	ENSG00000184916	1	JAG2
GO:0034637	cellular carbohydrate biosynthetic process	0.32476	0.261517	ENSG00000170961	1	HAS2
GO:0050795	regulation of behavior	0.32476	0.261517	ENSG00000105991	1	HOXA1
GO:0051965	positive regulation of synapse assembly	0.32476	0.261517	ENSG00000165300	1	SLITRK5
GO:0060193	positive regulation of lipase activity	0.32476	0.261517	ENSG00000134853	1	PDGFRA
GO:1903428	positive regulation of reactive oxygen species biosynthetic process	0.32476	0.261517	ENSG00000069974	1	RAB27A
GO:0043406	positive regulation of MAP kinase activity	0.32637	0.262813	ENSG00000164086/ENSG00000129474	2	DUSP7/AJUBA
GO:0003208	cardiac ventricle morphogenesis	0.32637	0.262813	ENSG00000103241	1	FOXF1
GO:0045669	positive regulation of osteoblast differentiation	0.32637	0.262813	ENSG00000104415	1	CCN4
GO:0071230	cellular response to amino acid stimulus	0.32637	0.262813	ENSG00000134853	1	PDGFRA
GO:1903036	positive regulation of response to wounding	0.32637	0.262813	ENSG00000104415	1	CCN4
GO:1903312	negative regulation of mRNA metabolic process	0.32637	0.262813	ENSG00000168646	1	AXIN2
GO:0043297	apical junction assembly	0.329927	0.265678	ENSG00000019549	1	SNAI2
GO:0045637	regulation of myeloid cell differentiation	0.331594	0.267021	ENSG00000164104/ENSG00000134138	2	HMGB2/MEIS2
GO:0045926	negative regulation of growth	0.331862	0.267237	ENSG00000135919/ENSG00000163132	2	SERPINE2/MSX1
GO:0060326	cell chemotaxis	0.331862	0.267237	ENSG00000164104/ENSG00000134853	2	HMGB2/PDGFRA
GO:0007032	endosome organization	0.331862	0.267237	ENSG00000069974	1	RAB27A
GO:0043407	negative regulation of MAP kinase activity	0.331862	0.267237	ENSG00000164086	1	DUSP7
GO:0008344	adult locomotory behavior	0.334162	0.269089	ENSG00000173406	1	DAB1
GO:0021536	diencephalon development	0.334162	0.269089	ENSG00000163132	1	MSX1
GO:0038034	signal transduction in absence of ligand	0.334162	0.269089	ENSG00000019549	1	SNAI2
GO:0097192	extrinsic apoptotic signaling pathway in absence of ligand	0.334162	0.269089	ENSG00000019549	1	SNAI2
GO:0030104	water homeostasis	0.337232	0.271561	ENSG00000170961	1	HAS2
GO:0033143	regulation of intracellular steroid hormone receptor signaling pathway	0.337232	0.271561	ENSG00000179094	1	PER1
GO:0045652	regulation of megakaryocyte differentiation	0.339468	0.273361	ENSG00000164104	1	HMGB2
GO:0045913	positive regulation of carbohydrate metabolic process	0.339468	0.273361	ENSG00000170961	1	HAS2
GO:0048024	regulation of mRNA splicing, via spliceosome	0.339468	0.273361	ENSG00000131773	1	KHDRBS3
GO:0051279	regulation of release of sequestered calcium ion into cytosol	0.339468	0.273361	ENSG00000134817	1	APLNR
GO:0043491	protein kinase B signaling	0.339631	0.273493	ENSG00000134853/ENSG00000102678	2	PDGFRA/FGF9
GO:0007193	adenylate cyclase-inhibiting G protein-coupled receptor signaling pathway	0.34629	0.278854	ENSG00000131016	1	AKAP12
GO:0001822	kidney development	0.348024	0.280251	ENSG00000170961/ENSG00000134853	2	HAS2/PDGFRA
GO:0050663	cytokine secretion	0.348024	0.280251	ENSG00000131016/ENSG00000104415	2	AKAP12/CCN4
GO:0072331	signal transduction by p53 class mediator	0.348024	0.280251	ENSG00000163132/ENSG00000019549	2	MSX1/SNAI2
GO:0008306	associative learning	0.348024	0.280251	ENSG00000134138	1	MEIS2
GO:0097581	lamellipodium organization	0.348024	0.280251	ENSG00000129474	1	AJUBA
GO:0051348	negative regulation of transferase activity	0.350725	0.282426	ENSG00000164086/ENSG00000129474	2	DUSP7/AJUBA
GO:0006476	protein deacetylation	0.350961	0.282616	ENSG00000179094	1	PER1
GO:0070372	regulation of ERK1 and ERK2 cascade	0.351639	0.283162	ENSG00000131016/ENSG00000134853	2	AKAP12/PDGFRA
GO:0010771	negative regulation of cell morphogenesis involved in differentiation	0.352222	0.283631	ENSG00000173406	1	DAB1
GO:0014855	striated muscle cell proliferation	0.352222	0.283631	ENSG00000102678	1	FGF9
GO:0030512	negative regulation of transforming growth factor beta receptor signaling pathway	0.352222	0.283631	ENSG00000128045	1	RASL11B
GO:0042058	regulation of epidermal growth factor receptor signaling pathway	0.352222	0.283631	ENSG00000007384	1	RHBDF1
GO:0050766	positive regulation of phagocytosis	0.352222	0.283631	ENSG00000069974	1	RAB27A
GO:0051480	regulation of cytosolic calcium ion concentration	0.352631	0.283961	ENSG00000134853/ENSG00000134817	2	PDGFRA/APLNR
GO:0016266	O-glycan processing	0.3551	0.285949	ENSG00000164574	1	GALNT10
GO:0030510	regulation of BMP signaling pathway	0.357125	0.28758	ENSG00000163132	1	MSX1
GO:0042108	positive regulation of cytokine biosynthetic process	0.357125	0.28758	ENSG00000131016	1	AKAP12
GO:0072332	intrinsic apoptotic signaling pathway by p53 class mediator	0.357125	0.28758	ENSG00000163132	1	MSX1
GO:1903845	negative regulation of cellular response to transforming growth factor beta stimulus	0.357125	0.28758	ENSG00000128045	1	RASL11B
GO:0001708	cell fate specification	0.359652	0.289615	ENSG00000149922	1	TBX6
GO:0031532	actin cytoskeleton reorganization	0.359652	0.289615	ENSG00000134853	1	PDGFRA
GO:0030522	intracellular receptor signaling pathway	0.359652	0.289615	ENSG00000179094/ENSG00000019549	2	PER1/SNAI2
GO:0016050	vesicle organization	0.360675	0.290438	ENSG00000069974/ENSG00000135919	2	RAB27A/SERPINE2
GO:0002532	production of molecular mediator involved in inflammatory response	0.360675	0.290438	ENSG00000179094	1	PER1
GO:0007045	cell-substrate adherens junction assembly	0.360675	0.290438	ENSG00000129474	1	AJUBA
GO:0021766	hippocampus development	0.360675	0.290438	ENSG00000173406	1	DAB1
GO:0048041	focal adhesion assembly	0.360675	0.290438	ENSG00000129474	1	AJUBA
GO:0055021	regulation of cardiac muscle tissue growth	0.360675	0.290438	ENSG00000102678	1	FGF9
GO:0097193	intrinsic apoptotic signaling pathway	0.361376	0.291003	ENSG00000163132/ENSG00000019549	2	MSX1/SNAI2
GO:1903311	regulation of mRNA metabolic process	0.361376	0.291003	ENSG00000168646/ENSG00000131773	2	AXIN2/KHDRBS3
GO:0001843	neural tube closure	0.361376	0.291003	ENSG00000164458	1	TBXT
GO:0045921	positive regulation of exocytosis	0.361376	0.291003	ENSG00000069974	1	RAB27A
GO:0051781	positive regulation of cell division	0.361376	0.291003	ENSG00000102678	1	FGF9
GO:0055013	cardiac muscle cell development	0.361376	0.291003	ENSG00000134853	1	PDGFRA
GO:1903725	regulation of phospholipid metabolic process	0.361376	0.291003	ENSG00000134853	1	PDGFRA
GO:0034446	substrate adhesion-dependent cell spreading	0.363286	0.292541	ENSG00000170961	1	HAS2
GO:0048814	regulation of dendrite morphogenesis	0.363286	0.292541	ENSG00000169439	1	SDC2
GO:0060291	long-term synaptic potentiation	0.363286	0.292541	ENSG00000135919	1	SERPINE2
GO:0060606	tube closure	0.363286	0.292541	ENSG00000164458	1	TBXT
GO:0032481	positive regulation of type I interferon production	0.364758	0.293726	ENSG00000164104	1	HMGB2
GO:0035601	protein deacylation	0.364758	0.293726	ENSG00000179094	1	PER1
GO:0044264	cellular polysaccharide metabolic process	0.364758	0.293726	ENSG00000170961	1	HAS2
GO:0048013	ephrin receptor signaling pathway	0.364758	0.293726	ENSG00000169439	1	SDC2
GO:1901184	regulation of ERBB signaling pathway	0.364758	0.293726	ENSG00000007384	1	RHBDF1
GO:0070371	ERK1 and ERK2 cascade	0.367025	0.295551	ENSG00000131016/ENSG00000134853	2	AKAP12/PDGFRA
GO:0010927	cellular component assembly involved in morphogenesis	0.367025	0.295551	ENSG00000134853	1	PDGFRA
GO:0050918	positive chemotaxis	0.367025	0.295551	ENSG00000164104	1	HMGB2
GO:0043010	camera-type eye development	0.368443	0.296693	ENSG00000111186/ENSG00000134853	2	WNT5B/PDGFRA
GO:0014068	positive regulation of phosphatidylinositol 3-kinase signaling	0.368443	0.296693	ENSG00000134853	1	PDGFRA
GO:0048145	regulation of fibroblast proliferation	0.368443	0.296693	ENSG00000134853	1	PDGFRA
GO:0060420	regulation of heart growth	0.368443	0.296693	ENSG00000102678	1	FGF9
GO:2001022	positive regulation of response to DNA damage stimulus	0.368443	0.296693	ENSG00000163132	1	MSX1
GO:0006368	transcription elongation from RNA polymerase II promoter	0.370658	0.298477	ENSG00000171843	1	MLLT3
GO:0048144	fibroblast proliferation	0.370658	0.298477	ENSG00000134853	1	PDGFRA
GO:0050829	defense response to Gram-negative bacterium	0.370658	0.298477	ENSG00000164104	1	HMGB2
GO:0014020	primary neural tube formation	0.371202	0.298915	ENSG00000164458	1	TBXT
GO:0022404	molting cycle process	0.371202	0.298915	ENSG00000144749	1	LRIG1
GO:0022405	hair cycle process	0.371202	0.298915	ENSG00000144749	1	LRIG1
GO:0045445	myoblast differentiation	0.371202	0.298915	ENSG00000164458	1	TBXT
GO:0051983	regulation of chromosome segregation	0.371202	0.298915	ENSG00000168646	1	AXIN2
GO:0055006	cardiac cell development	0.371202	0.298915	ENSG00000134853	1	PDGFRA
GO:2001021	negative regulation of response to DNA damage stimulus	0.371202	0.298915	ENSG00000019549	1	SNAI2
GO:0008585	female gonad development	0.372566	0.300014	ENSG00000134853	1	PDGFRA
GO:0010717	regulation of epithelial to mesenchymal transition	0.372566	0.300014	ENSG00000168646	1	AXIN2
GO:0032392	DNA geometric change	0.372566	0.300014	ENSG00000164104	1	HMGB2
GO:0033273	response to vitamin	0.372566	0.300014	ENSG00000019549	1	SNAI2
GO:0042063	gliogenesis	0.372566	0.300014	ENSG00000173406/ENSG00000135919	2	DAB1/SERPINE2
GO:0071356	cellular response to tumor necrosis factor	0.372566	0.300014	ENSG00000131016/ENSG00000170961	2	AKAP12/HAS2
GO:0051591	response to cAMP	0.374203	0.301332	ENSG00000179094	1	PER1
GO:0060191	regulation of lipase activity	0.374203	0.301332	ENSG00000134853	1	PDGFRA
GO:0061097	regulation of protein tyrosine kinase activity	0.374203	0.301332	ENSG00000181467	1	RAP2B
GO:1904062	regulation of cation transmembrane transport	0.374203	0.301332	ENSG00000152818/ENSG00000134817	2	UTRN/APLNR
GO:0050890	cognition	0.375158	0.302101	ENSG00000105991/ENSG00000134138	2	HOXA1/MEIS2
GO:0008625	extrinsic apoptotic signaling pathway via death domain receptors	0.375158	0.302101	ENSG00000164104	1	HMGB2
GO:0014015	positive regulation of gliogenesis	0.375158	0.302101	ENSG00000135919	1	SERPINE2
GO:0031058	positive regulation of histone modification	0.375158	0.302101	ENSG00000019549	1	SNAI2
GO:0043255	regulation of carbohydrate biosynthetic process	0.375158	0.302101	ENSG00000170961	1	HAS2
GO:0009895	negative regulation of catabolic process	0.376023	0.302797	ENSG00000168646/ENSG00000135919	2	AXIN2/SERPINE2
GO:0002286	T cell activation involved in immune response	0.376023	0.302797	ENSG00000069974	1	RAB27A
GO:0010522	regulation of calcium ion transport into cytosol	0.376023	0.302797	ENSG00000134817	1	APLNR
GO:0034333	adherens junction assembly	0.376023	0.302797	ENSG00000129474	1	AJUBA
GO:0045833	negative regulation of lipid metabolic process	0.376023	0.302797	ENSG00000019549	1	SNAI2
GO:0098732	macromolecule deacylation	0.376023	0.302797	ENSG00000179094	1	PER1
GO:0032642	regulation of chemokine production	0.37849	0.304784	ENSG00000019549	1	SNAI2
GO:2000772	regulation of cellular senescence	0.37849	0.304784	ENSG00000080839	1	RBL1
GO:0001656	metanephros development	0.380529	0.306426	ENSG00000134853	1	PDGFRA
GO:0045778	positive regulation of ossification	0.380529	0.306426	ENSG00000104415	1	CCN4
GO:0046545	development of primary female sexual characteristics	0.380529	0.306426	ENSG00000134853	1	PDGFRA
GO:0005976	polysaccharide metabolic process	0.382136	0.30772	ENSG00000170961	1	HAS2
GO:0030219	megakaryocyte differentiation	0.382136	0.30772	ENSG00000164104	1	HMGB2
GO:0045844	positive regulation of striated muscle tissue development	0.382136	0.30772	ENSG00000102678	1	FGF9
GO:0048636	positive regulation of muscle organ development	0.382136	0.30772	ENSG00000102678	1	FGF9
GO:0001841	neural tube formation	0.38413	0.309326	ENSG00000164458	1	TBXT
GO:0007044	cell-substrate junction assembly	0.38413	0.309326	ENSG00000129474	1	AJUBA
GO:1901863	positive regulation of muscle tissue development	0.38413	0.309326	ENSG00000102678	1	FGF9
GO:0033044	regulation of chromosome organization	0.385284	0.310255	ENSG00000168646/ENSG00000019549	2	AXIN2/SNAI2
GO:0007009	plasma membrane organization	0.385284	0.310255	ENSG00000138119	1	MYOF
GO:1904705	regulation of vascular smooth muscle cell proliferation	0.385284	0.310255	ENSG00000102678	1	FGF9
GO:1990874	vascular smooth muscle cell proliferation	0.385284	0.310255	ENSG00000102678	1	FGF9
GO:2001243	negative regulation of intrinsic apoptotic signaling pathway	0.385284	0.310255	ENSG00000019549	1	SNAI2
GO:0021510	spinal cord development	0.387232	0.311824	ENSG00000173406	1	DAB1
GO:0032760	positive regulation of tumor necrosis factor production	0.387232	0.311824	ENSG00000131016	1	AKAP12
GO:0050810	regulation of steroid biosynthetic process	0.387232	0.311824	ENSG00000019549	1	SNAI2
GO:0045639	positive regulation of myeloid cell differentiation	0.38998	0.314037	ENSG00000164104	1	HMGB2
GO:0032496	response to lipopolysaccharide	0.391175	0.314999	ENSG00000131016/ENSG00000164104	2	AKAP12/HMGB2
GO:0032602	chemokine production	0.391888	0.315573	ENSG00000019549	1	SNAI2
GO:0045638	negative regulation of myeloid cell differentiation	0.391888	0.315573	ENSG00000134138	1	MEIS2
GO:0001523	retinoid metabolic process	0.393016	0.316481	ENSG00000169439	1	SDC2
GO:0008593	regulation of Notch signaling pathway	0.393016	0.316481	ENSG00000184916	1	JAG2
GO:0062014	negative regulation of small molecule metabolic process	0.393016	0.316481	ENSG00000019549	1	SNAI2
GO:1903557	positive regulation of tumor necrosis factor superfamily cytokine production	0.393016	0.316481	ENSG00000131016	1	AKAP12
GO:0006936	muscle contraction	0.393016	0.316481	ENSG00000152818/ENSG00000138119	2	UTRN/MYOF
GO:0034612	response to tumor necrosis factor	0.39376	0.31708	ENSG00000131016/ENSG00000170961	2	AKAP12/HAS2
GO:0071902	positive regulation of protein serine/threonine kinase activity	0.39376	0.31708	ENSG00000164086/ENSG00000129474	2	DUSP7/AJUBA
GO:0051056	regulation of small GTPase mediated signal transduction	0.396476	0.319268	ENSG00000126822/ENSG00000071205	2	PLEKHG3/ARHGAP10
GO:0007043	cell-cell junction assembly	0.397073	0.319748	ENSG00000019549	1	SNAI2
GO:0090342	regulation of cell aging	0.397073	0.319748	ENSG00000080839	1	RBL1
GO:0043405	regulation of MAP kinase activity	0.39766	0.320221	ENSG00000164086/ENSG00000129474	2	DUSP7/AJUBA
GO:0006606	protein import into nucleus	0.39766	0.320221	ENSG00000102678	1	FGF9
GO:0007052	mitotic spindle organization	0.39766	0.320221	ENSG00000118007	1	STAG1
GO:0008630	intrinsic apoptotic signaling pathway in response to DNA damage	0.39766	0.320221	ENSG00000019549	1	SNAI2
GO:0051225	spindle assembly	0.39766	0.320221	ENSG00000118007	1	STAG1
GO:1905269	positive regulation of chromatin organization	0.39766	0.320221	ENSG00000019549	1	SNAI2
GO:0008202	steroid metabolic process	0.398573	0.320956	ENSG00000134853/ENSG00000019549	2	PDGFRA/SNAI2
GO:0060562	epithelial tube morphogenesis	0.398573	0.320956	ENSG00000164458/ENSG00000103241	2	TBXT/FOXF1
GO:0002065	columnar/cuboidal epithelial cell differentiation	0.398641	0.321011	ENSG00000184916	1	JAG2
GO:0051963	regulation of synapse assembly	0.398641	0.321011	ENSG00000165300	1	SLITRK5
GO:1901888	regulation of cell junction assembly	0.398641	0.321011	ENSG00000019549	1	SNAI2
GO:0055024	regulation of cardiac muscle tissue development	0.401144	0.323026	ENSG00000102678	1	FGF9
GO:0007265	Ras protein signal transduction	0.401144	0.323026	ENSG00000181467/ENSG00000126822	2	RAP2B/PLEKHG3
GO:0008543	fibroblast growth factor receptor signaling pathway	0.402598	0.324197	ENSG00000102678	1	FGF9
GO:0016101	diterpenoid metabolic process	0.402598	0.324197	ENSG00000169439	1	SDC2
GO:0035335	peptidyl-tyrosine dephosphorylation	0.402598	0.324197	ENSG00000164086	1	DUSP7
GO:0006282	regulation of DNA repair	0.404341	0.325601	ENSG00000168646	1	AXIN2
GO:0042752	regulation of circadian rhythm	0.404341	0.325601	ENSG00000179094	1	PER1
GO:0050905	neuromuscular process	0.404341	0.325601	ENSG00000105991	1	HOXA1
GO:0030282	bone mineralization	0.404831	0.325995	ENSG00000168646	1	AXIN2
GO:0035725	sodium ion transmembrane transport	0.404831	0.325995	ENSG00000152818	1	UTRN
GO:0043200	response to amino acid	0.404831	0.325995	ENSG00000134853	1	PDGFRA
GO:0046660	female sex differentiation	0.404831	0.325995	ENSG00000134853	1	PDGFRA
GO:0050764	regulation of phagocytosis	0.404831	0.325995	ENSG00000069974	1	RAB27A
GO:0055017	cardiac muscle tissue growth	0.404831	0.325995	ENSG00000102678	1	FGF9
GO:0002237	response to molecule of bacterial origin	0.406488	0.32733	ENSG00000131016/ENSG00000164104	2	AKAP12/HMGB2
GO:0007173	epidermal growth factor receptor signaling pathway	0.406947	0.327699	ENSG00000007384	1	RHBDF1
GO:0014902	myotube differentiation	0.40781	0.328394	ENSG00000138119	1	MYOF
GO:0021761	limbic system development	0.40781	0.328394	ENSG00000173406	1	DAB1
GO:0030101	natural killer cell activation	0.40781	0.328394	ENSG00000069974	1	RAB27A
GO:0051209	release of sequestered calcium ion into cytosol	0.40781	0.328394	ENSG00000134817	1	APLNR
GO:0051283	negative regulation of sequestering of calcium ion	0.40781	0.328394	ENSG00000134817	1	APLNR
GO:0045666	positive regulation of neuron differentiation	0.409477	0.329737	ENSG00000173406/ENSG00000128652	2	DAB1/HOXD3
GO:0002704	negative regulation of leukocyte mediated immunity	0.409477	0.329737	ENSG00000103241	1	FOXF1
GO:0043502	regulation of muscle adaptation	0.409477	0.329737	ENSG00000152818	1	UTRN
GO:0019751	polyol metabolic process	0.409486	0.329744	ENSG00000138119	1	MYOF
GO:0046620	regulation of organ growth	0.409486	0.329744	ENSG00000102678	1	FGF9
GO:0050684	regulation of mRNA processing	0.409486	0.329744	ENSG00000131773	1	KHDRBS3
GO:0051282	regulation of sequestering of calcium ion	0.409486	0.329744	ENSG00000134817	1	APLNR
GO:0060964	regulation of gene silencing by miRNA	0.409486	0.329744	ENSG00000129474	1	AJUBA
GO:1903426	regulation of reactive oxygen species biosynthetic process	0.409486	0.329744	ENSG00000069974	1	RAB27A
GO:2000379	positive regulation of reactive oxygen species metabolic process	0.409486	0.329744	ENSG00000069974	1	RAB27A
GO:0006997	nucleus organization	0.413546	0.333014	ENSG00000164104	1	HMGB2
GO:0017015	regulation of transforming growth factor beta receptor signaling pathway	0.413546	0.333014	ENSG00000128045	1	RASL11B
GO:0045446	endothelial cell differentiation	0.413546	0.333014	ENSG00000120075	1	HOXB5
GO:0060419	heart growth	0.413546	0.333014	ENSG00000102678	1	FGF9
GO:0051208	sequestering of calcium ion	0.415964	0.334961	ENSG00000134817	1	APLNR
GO:0018108	peptidyl-tyrosine phosphorylation	0.416307	0.335237	ENSG00000181467/ENSG00000134853	2	RAP2B/PDGFRA
GO:0001952	regulation of cell-matrix adhesion	0.416307	0.335237	ENSG00000152818	1	UTRN
GO:0003014	renal system process	0.416307	0.335237	ENSG00000170961	1	HAS2
GO:0060147	regulation of posttranscriptional gene silencing	0.416307	0.335237	ENSG00000129474	1	AJUBA
GO:0060966	regulation of gene silencing by RNA	0.416307	0.335237	ENSG00000129474	1	AJUBA
GO:1903844	regulation of cellular response to transforming growth factor beta stimulus	0.416307	0.335237	ENSG00000128045	1	RASL11B
GO:0019882	antigen processing and presentation	0.417386	0.336106	ENSG00000182287/ENSG00000069974	2	AP1S2/RAB27A
GO:0043484	regulation of RNA splicing	0.418034	0.336628	ENSG00000131773	1	KHDRBS3
GO:0018212	peptidyl-tyrosine modification	0.418034	0.336628	ENSG00000181467/ENSG00000134853	2	RAP2B/PDGFRA
GO:0030316	osteoclast differentiation	0.422172	0.33996	ENSG00000104415	1	CCN4
GO:0090398	cellular senescence	0.422172	0.33996	ENSG00000080839	1	RBL1
GO:1904019	epithelial cell apoptotic process	0.422172	0.33996	ENSG00000184916	1	JAG2
GO:0001838	embryonic epithelial tube formation	0.424096	0.341509	ENSG00000164458	1	TBXT
GO:0006721	terpenoid metabolic process	0.424096	0.341509	ENSG00000169439	1	SDC2
GO:0000280	nuclear division	0.425795	0.342877	ENSG00000118007/ENSG00000163132	2	STAG1/MSX1
GO:0090101	negative regulation of transmembrane receptor protein serine/threonine kinase signaling pathway	0.426005	0.343046	ENSG00000128045	1	RASL11B
GO:0003206	cardiac chamber morphogenesis	0.426651	0.343566	ENSG00000103241	1	FOXF1
GO:0021987	cerebral cortex development	0.426651	0.343566	ENSG00000173406	1	DAB1
GO:0048489	synaptic vesicle transport	0.426651	0.343566	ENSG00000069974	1	RAB27A
GO:0060071	Wnt signaling pathway, planar cell polarity pathway	0.426651	0.343566	ENSG00000171843	1	MLLT3
GO:0097480	establishment of synaptic vesicle localization	0.426651	0.343566	ENSG00000069974	1	RAB27A
GO:0009582	detection of abiotic stimulus	0.428942	0.345411	ENSG00000135919	1	SERPINE2
GO:0002456	T cell mediated immunity	0.42914	0.345571	ENSG00000069974	1	RAB27A
GO:0006493	protein O-linked glycosylation	0.42914	0.345571	ENSG00000164574	1	GALNT10
GO:0046425	regulation of JAK-STAT cascade	0.42914	0.345571	ENSG00000173406	1	DAB1
GO:0050830	defense response to Gram-positive bacterium	0.42914	0.345571	ENSG00000164104	1	HMGB2
GO:0051928	positive regulation of calcium ion transport	0.42914	0.345571	ENSG00000134817	1	APLNR
GO:0090175	regulation of establishment of planar polarity	0.42914	0.345571	ENSG00000171843	1	MLLT3
GO:0003231	cardiac ventricle development	0.430902	0.346989	ENSG00000103241	1	FOXF1
GO:0030010	establishment of cell polarity	0.430902	0.346989	ENSG00000103241	1	FOXF1
GO:0006874	cellular calcium ion homeostasis	0.430902	0.346989	ENSG00000134853/ENSG00000134817	2	PDGFRA/APLNR
GO:0022612	gland morphogenesis	0.430902	0.346989	ENSG00000019549	1	SNAI2
GO:0051153	regulation of striated muscle cell differentiation	0.430902	0.346989	ENSG00000163132	1	MSX1
GO:0097553	calcium ion transmembrane import into cytosol	0.430902	0.346989	ENSG00000134817	1	APLNR
GO:1902850	microtubule cytoskeleton organization involved in mitosis	0.430902	0.346989	ENSG00000118007	1	STAG1
GO:0042176	regulation of protein catabolic process	0.430902	0.346989	ENSG00000007384/ENSG00000135919	2	RHBDF1/SERPINE2
GO:0051098	regulation of binding	0.430902	0.346989	ENSG00000164104/ENSG00000163132	2	HMGB2/MSX1
GO:0006605	protein targeting	0.430902	0.346989	ENSG00000131016/ENSG00000069974	2	AKAP12/RAB27A
GO:0014706	striated muscle tissue development	0.430902	0.346989	ENSG00000134853/ENSG00000102678	2	PDGFRA/FGF9
GO:0006354	DNA-templated transcription, elongation	0.430902	0.346989	ENSG00000171843	1	MLLT3
GO:0019218	regulation of steroid metabolic process	0.430902	0.346989	ENSG00000019549	1	SNAI2
GO:0046683	response to organophosphorus	0.430902	0.346989	ENSG00000179094	1	PER1
GO:0055007	cardiac muscle cell differentiation	0.430902	0.346989	ENSG00000134853	1	PDGFRA
GO:0051170	import into nucleus	0.432692	0.348431	ENSG00000102678	1	FGF9
GO:0072175	epithelial tube formation	0.432692	0.348431	ENSG00000164458	1	TBXT
GO:0045787	positive regulation of cell cycle	0.433035	0.348707	ENSG00000134138/ENSG00000163132	2	MEIS2/MSX1
GO:0048545	response to steroid hormone	0.435407	0.350617	ENSG00000164104/ENSG00000179094	2	HMGB2/PER1
GO:0030218	erythrocyte differentiation	0.435407	0.350617	ENSG00000164104	1	HMGB2
GO:0034754	cellular hormone metabolic process	0.435407	0.350617	ENSG00000134853	1	PDGFRA
GO:0042035	regulation of cytokine biosynthetic process	0.435407	0.350617	ENSG00000131016	1	AKAP12
GO:2000736	regulation of stem cell differentiation	0.435407	0.350617	ENSG00000134853	1	PDGFRA
GO:0007286	spermatid development	0.436742	0.351692	ENSG00000164104	1	HMGB2
GO:0030518	intracellular steroid hormone receptor signaling pathway	0.436742	0.351692	ENSG00000179094	1	PER1
GO:0045995	regulation of embryonic development	0.436742	0.351692	ENSG00000113722	1	CDX1
GO:0035023	regulation of Rho protein signal transduction	0.438305	0.352951	ENSG00000126822	1	PLEKHG3
GO:0038127	ERBB signaling pathway	0.438305	0.352951	ENSG00000007384	1	RHBDF1
GO:0018205	peptidyl-lysine modification	0.438305	0.352951	ENSG00000179094/ENSG00000019549	2	PER1/SNAI2
GO:0055074	calcium ion homeostasis	0.438546	0.353145	ENSG00000134853/ENSG00000134817	2	PDGFRA/APLNR
GO:0034605	cellular response to heat	0.438546	0.353145	ENSG00000138119	1	MYOF
GO:1903409	reactive oxygen species biosynthetic process	0.438546	0.353145	ENSG00000069974	1	RAB27A
GO:1904892	regulation of STAT cascade	0.438546	0.353145	ENSG00000173406	1	DAB1
GO:2000241	regulation of reproductive process	0.438546	0.353145	ENSG00000163132	1	MSX1
GO:0045216	cell-cell junction organization	0.440658	0.354846	ENSG00000019549	1	SNAI2
GO:0072503	cellular divalent inorganic cation homeostasis	0.441523	0.355543	ENSG00000134853/ENSG00000134817	2	PDGFRA/APLNR
GO:0006720	isoprenoid metabolic process	0.441523	0.355543	ENSG00000169439	1	SDC2
GO:0070613	regulation of protein processing	0.441523	0.355543	ENSG00000135919	1	SERPINE2
GO:0097479	synaptic vesicle localization	0.441523	0.355543	ENSG00000069974	1	RAB27A
GO:0060537	muscle tissue development	0.442068	0.355981	ENSG00000134853/ENSG00000102678	2	PDGFRA/FGF9
GO:0006766	vitamin metabolic process	0.443197	0.35689	ENSG00000019549	1	SNAI2
GO:0044344	cellular response to fibroblast growth factor stimulus	0.444034	0.357564	ENSG00000102678	1	FGF9
GO:0048515	spermatid differentiation	0.444034	0.357564	ENSG00000164104	1	HMGB2
GO:1903317	regulation of protein maturation	0.444034	0.357564	ENSG00000135919	1	SERPINE2
GO:1904064	positive regulation of cation transmembrane transport	0.444034	0.357564	ENSG00000134817	1	APLNR
GO:0001736	establishment of planar polarity	0.444858	0.358227	ENSG00000171843	1	MLLT3
GO:0007164	establishment of tissue polarity	0.444858	0.358227	ENSG00000171843	1	MLLT3
GO:0060968	regulation of gene silencing	0.444858	0.358227	ENSG00000129474	1	AJUBA
GO:1903670	regulation of sprouting angiogenesis	0.444858	0.358227	ENSG00000134817	1	APLNR
GO:0010770	positive regulation of cell morphogenesis involved in differentiation	0.445668	0.35888	ENSG00000170961	1	HAS2
GO:0032479	regulation of type I interferon production	0.445668	0.35888	ENSG00000164104	1	HMGB2
GO:0034101	erythrocyte homeostasis	0.445668	0.35888	ENSG00000164104	1	HMGB2
GO:0071901	negative regulation of protein serine/threonine kinase activity	0.445668	0.35888	ENSG00000164086	1	DUSP7
GO:0003158	endothelium development	0.447285	0.360182	ENSG00000120075	1	HOXB5
GO:0042177	negative regulation of protein catabolic process	0.447285	0.360182	ENSG00000135919	1	SERPINE2
GO:0032606	type I interferon production	0.448068	0.360813	ENSG00000164104	1	HMGB2
GO:0042089	cytokine biosynthetic process	0.448068	0.360813	ENSG00000131016	1	AKAP12
GO:0106106	cold-induced thermogenesis	0.448068	0.360813	ENSG00000140332	1	TLE3
GO:0120161	regulation of cold-induced thermogenesis	0.448068	0.360813	ENSG00000140332	1	TLE3
GO:0014074	response to purine-containing compound	0.448431	0.361105	ENSG00000179094	1	PER1
GO:0042107	cytokine metabolic process	0.448431	0.361105	ENSG00000131016	1	AKAP12
GO:0050773	regulation of dendrite development	0.448431	0.361105	ENSG00000169439	1	SDC2
GO:0060041	retina development in camera-type eye	0.448431	0.361105	ENSG00000134853	1	PDGFRA
GO:0062013	positive regulation of small molecule metabolic process	0.448431	0.361105	ENSG00000170961	1	HAS2
GO:0007612	learning	0.448723	0.36134	ENSG00000134138	1	MEIS2
GO:0010212	response to ionizing radiation	0.448723	0.36134	ENSG00000019549	1	SNAI2
GO:0031056	regulation of histone modification	0.448723	0.36134	ENSG00000019549	1	SNAI2
GO:0048285	organelle fission	0.448723	0.36134	ENSG00000118007/ENSG00000163132	2	STAG1/MSX1
GO:0006334	nucleosome assembly	0.448723	0.36134	ENSG00000164104	1	HMGB2
GO:0017038	protein import	0.448723	0.36134	ENSG00000102678	1	FGF9
GO:0019933	cAMP-mediated signaling	0.448723	0.36134	ENSG00000134817	1	APLNR
GO:0045834	positive regulation of lipid metabolic process	0.448723	0.36134	ENSG00000134853	1	PDGFRA
GO:0071774	response to fibroblast growth factor	0.448723	0.36134	ENSG00000102678	1	FGF9
GO:0072006	nephron development	0.448723	0.36134	ENSG00000134853	1	PDGFRA
GO:1903169	regulation of calcium ion transmembrane transport	0.448723	0.36134	ENSG00000134817	1	APLNR
GO:0050808	synapse organization	0.448919	0.361498	ENSG00000152818/ENSG00000165300	2	UTRN/SLITRK5
GO:0043087	regulation of GTPase activity	0.44946	0.361934	ENSG00000129474/ENSG00000071205	2	AJUBA/ARHGAP10
GO:0007259	JAK-STAT cascade	0.44946	0.361934	ENSG00000173406	1	DAB1
GO:0007338	single fertilization	0.44946	0.361934	ENSG00000164458	1	TBXT
GO:0072507	divalent inorganic cation homeostasis	0.450992	0.363167	ENSG00000134853/ENSG00000134817	2	PDGFRA/APLNR
GO:0060402	calcium ion transport into cytosol	0.450992	0.363167	ENSG00000134817	1	APLNR
GO:0050804	modulation of chemical synaptic transmission	0.451745	0.363774	ENSG00000131016/ENSG00000135919	2	AKAP12/SERPINE2
GO:0043524	negative regulation of neuron apoptotic process	0.452243	0.364175	ENSG00000103460	1	TOX3
GO:0099177	regulation of trans-synaptic signaling	0.452243	0.364175	ENSG00000131016/ENSG00000135919	2	AKAP12/SERPINE2
GO:0001764	neuron migration	0.45321	0.364953	ENSG00000173406	1	DAB1
GO:0050770	regulation of axonogenesis	0.45321	0.364953	ENSG00000173406	1	DAB1
GO:0140013	meiotic nuclear division	0.45321	0.364953	ENSG00000163132	1	MSX1
GO:1903532	positive regulation of secretion by cell	0.453232	0.364971	ENSG00000131016/ENSG00000069974	2	AKAP12/RAB27A
GO:0001933	negative regulation of protein phosphorylation	0.454125	0.36569	ENSG00000164086/ENSG00000179094	2	DUSP7/PER1
GO:0034767	positive regulation of ion transmembrane transport	0.4543	0.365831	ENSG00000134817	1	APLNR
GO:0008277	regulation of G protein-coupled receptor signaling pathway	0.458062	0.368861	ENSG00000134817	1	APLNR
GO:1990845	adaptive thermogenesis	0.458062	0.368861	ENSG00000140332	1	TLE3
GO:0021915	neural tube development	0.459439	0.369969	ENSG00000164458	1	TBXT
GO:0001558	regulation of cell growth	0.459439	0.369969	ENSG00000135919/ENSG00000163132	2	SERPINE2/MSX1
GO:1901342	regulation of vasculature development	0.459439	0.369969	ENSG00000102678/ENSG00000134817	2	FGF9/APLNR
GO:0007088	regulation of mitotic nuclear division	0.46097	0.371202	ENSG00000118007	1	STAG1
GO:0097696	STAT cascade	0.465059	0.374495	ENSG00000173406	1	DAB1
GO:0000187	activation of MAPK activity	0.46725	0.37626	ENSG00000164086	1	DUSP7
GO:0000819	sister chromatid segregation	0.46725	0.37626	ENSG00000168646	1	AXIN2
GO:0031214	biomineral tissue development	0.46725	0.37626	ENSG00000168646	1	AXIN2
GO:0090288	negative regulation of cellular response to growth factor stimulus	0.46725	0.37626	ENSG00000128045	1	RASL11B
GO:1903046	meiotic cell cycle process	0.46725	0.37626	ENSG00000163132	1	MSX1
GO:0006644	phospholipid metabolic process	0.46725	0.37626	ENSG00000129474/ENSG00000134853	2	AJUBA/PDGFRA
GO:0016570	histone modification	0.46725	0.37626	ENSG00000179094/ENSG00000019549	2	PER1/SNAI2
GO:0071695	anatomical structure maturation	0.468447	0.377223	ENSG00000149922	1	TBX6
GO:0035567	non-canonical Wnt signaling pathway	0.471608	0.379769	ENSG00000171843	1	MLLT3
GO:0043271	negative regulation of ion transport	0.471608	0.379769	ENSG00000135919	1	SERPINE2
GO:0045931	positive regulation of mitotic cell cycle	0.471608	0.379769	ENSG00000134138	1	MEIS2
GO:0003018	vascular process in circulatory system	0.472143	0.380199	ENSG00000131016	1	AKAP12
GO:0007569	cell aging	0.472143	0.380199	ENSG00000080839	1	RBL1
GO:0016202	regulation of striated muscle tissue development	0.472143	0.380199	ENSG00000102678	1	FGF9
GO:0060401	cytosolic calcium ion transport	0.472143	0.380199	ENSG00000134817	1	APLNR
GO:0031497	chromatin assembly	0.47349	0.381284	ENSG00000164104	1	HMGB2
GO:0051100	negative regulation of binding	0.47349	0.381284	ENSG00000163132	1	MSX1
GO:0031032	actomyosin structure organization	0.475238	0.382692	ENSG00000134853	1	PDGFRA
GO:0002262	myeloid cell homeostasis	0.476132	0.383411	ENSG00000164104	1	HMGB2
GO:0007051	spindle organization	0.476132	0.383411	ENSG00000118007	1	STAG1
GO:1901861	regulation of muscle tissue development	0.476132	0.383411	ENSG00000102678	1	FGF9
GO:0003012	muscle system process	0.476132	0.383411	ENSG00000152818/ENSG00000138119	2	UTRN/MYOF
GO:0016569	covalent chromatin modification	0.476229	0.38349	ENSG00000179094/ENSG00000019549	2	PER1/SNAI2
GO:0003205	cardiac chamber development	0.476229	0.38349	ENSG00000103241	1	FOXF1
GO:0048634	regulation of muscle organ development	0.476229	0.38349	ENSG00000102678	1	FGF9
GO:0050715	positive regulation of cytokine secretion	0.476229	0.38349	ENSG00000131016	1	AKAP12
GO:0051047	positive regulation of secretion	0.476548	0.383747	ENSG00000131016/ENSG00000069974	2	AKAP12/RAB27A
GO:0051656	establishment of organelle localization	0.477369	0.384408	ENSG00000069974/ENSG00000103241	2	RAB27A/FOXF1
GO:0007266	Rho protein signal transduction	0.478001	0.384917	ENSG00000126822	1	PLEKHG3
GO:0019935	cyclic-nucleotide-mediated signaling	0.478001	0.384917	ENSG00000134817	1	APLNR
GO:0048754	branching morphogenesis of an epithelial tube	0.478001	0.384917	ENSG00000103241	1	FOXF1
GO:1903707	negative regulation of hemopoiesis	0.478001	0.384917	ENSG00000134138	1	MEIS2
GO:0007188	adenylate cyclase-modulating G protein-coupled receptor signaling pathway	0.479693	0.386279	ENSG00000131016	1	AKAP12
GO:0062012	regulation of small molecule metabolic process	0.479808	0.386372	ENSG00000170961/ENSG00000019549	2	HAS2/SNAI2
GO:0010634	positive regulation of epithelial cell migration	0.480142	0.38664	ENSG00000170961	1	HAS2
GO:0050680	negative regulation of epithelial cell proliferation	0.480142	0.38664	ENSG00000019549	1	SNAI2
GO:0050806	positive regulation of synaptic transmission	0.480142	0.38664	ENSG00000135919	1	SERPINE2
GO:0002285	lymphocyte activation involved in immune response	0.480581	0.386994	ENSG00000069974	1	RAB27A
GO:0048469	cell maturation	0.480581	0.386994	ENSG00000149922	1	TBX6
GO:0050709	negative regulation of protein secretion	0.480581	0.386994	ENSG00000007384	1	RHBDF1
GO:1902275	regulation of chromatin organization	0.480581	0.386994	ENSG00000019549	1	SNAI2
GO:0034614	cellular response to reactive oxygen species	0.482186	0.388287	ENSG00000134853	1	PDGFRA
GO:0034765	regulation of ion transmembrane transport	0.482186	0.388287	ENSG00000152818/ENSG00000134817	2	UTRN/APLNR
GO:0045807	positive regulation of endocytosis	0.482659	0.388667	ENSG00000069974	1	RAB27A
GO:0099003	vesicle-mediated transport in synapse	0.482659	0.388667	ENSG00000069974	1	RAB27A
GO:1901136	carbohydrate derivative catabolic process	0.482659	0.388667	ENSG00000169439	1	SDC2
GO:0007416	synapse assembly	0.483887	0.389656	ENSG00000165300	1	SLITRK5
GO:0019886	antigen processing and presentation of exogenous peptide antigen via MHC class II	0.483887	0.389656	ENSG00000182287	1	AP1S2
GO:0007163	establishment or maintenance of cell polarity	0.485516	0.390968	ENSG00000103241	1	FOXF1
GO:0002792	negative regulation of peptide secretion	0.487136	0.392272	ENSG00000007384	1	RHBDF1
GO:0002495	antigen processing and presentation of peptide antigen via MHC class II	0.487512	0.392575	ENSG00000182287	1	AP1S2
GO:0043488	regulation of mRNA stability	0.487512	0.392575	ENSG00000168646	1	AXIN2
GO:0061136	regulation of proteasomal protein catabolic process	0.487512	0.392575	ENSG00000007384	1	RHBDF1
GO:0071478	cellular response to radiation	0.487512	0.392575	ENSG00000019549	1	SNAI2
GO:0002504	antigen processing and presentation of peptide or polysaccharide antigen via MHC class II	0.4887	0.393532	ENSG00000182287	1	AP1S2
GO:0034728	nucleosome organization	0.4887	0.393532	ENSG00000164104	1	HMGB2
GO:0001659	temperature homeostasis	0.489468	0.394151	ENSG00000140332	1	TLE3
GO:0002040	sprouting angiogenesis	0.489468	0.394151	ENSG00000134817	1	APLNR
GO:0009566	fertilization	0.489468	0.394151	ENSG00000164458	1	TBXT
GO:0006875	cellular metal ion homeostasis	0.491888	0.396099	ENSG00000134853/ENSG00000134817	2	PDGFRA/APLNR
GO:0042267	natural killer cell mediated cytotoxicity	0.494499	0.398202	ENSG00000069974	1	RAB27A
GO:0035265	organ growth	0.494499	0.398202	ENSG00000102678	1	FGF9
GO:0043123	positive regulation of I-kappaB kinase/NF-kappaB signaling	0.494499	0.398202	ENSG00000129474	1	AJUBA
GO:0046328	regulation of JNK cascade	0.494499	0.398202	ENSG00000179094	1	PER1
GO:0048167	regulation of synaptic plasticity	0.494499	0.398202	ENSG00000135919	1	SERPINE2
GO:2001252	positive regulation of chromosome organization	0.494499	0.398202	ENSG00000019549	1	SNAI2
GO:0007187	G protein-coupled receptor signaling pathway, coupled to cyclic nucleotide second messenger	0.497165	0.400349	ENSG00000131016	1	AKAP12
GO:0021543	pallium development	0.497165	0.400349	ENSG00000173406	1	DAB1
GO:0050728	negative regulation of inflammatory response	0.497165	0.400349	ENSG00000103241	1	FOXF1
GO:0002228	natural killer cell mediated immunity	0.498693	0.401579	ENSG00000069974	1	RAB27A
GO:0043487	regulation of RNA stability	0.498968	0.401801	ENSG00000168646	1	AXIN2
GO:0051099	positive regulation of binding	0.498968	0.401801	ENSG00000164104	1	HMGB2
GO:0070507	regulation of microtubule cytoskeleton organization	0.498968	0.401801	ENSG00000118007	1	STAG1
GO:2001235	positive regulation of apoptotic signaling pathway	0.498968	0.401801	ENSG00000163132	1	MSX1
GO:0009408	response to heat	0.500063	0.402682	ENSG00000138119	1	MYOF
GO:0050729	positive regulation of inflammatory response	0.500063	0.402682	ENSG00000104415	1	CCN4
GO:0007179	transforming growth factor beta receptor signaling pathway	0.501148	0.403556	ENSG00000128045	1	RASL11B
GO:0043401	steroid hormone mediated signaling pathway	0.501148	0.403556	ENSG00000179094	1	PER1
GO:0006333	chromatin assembly or disassembly	0.502638	0.404756	ENSG00000164104	1	HMGB2
GO:0032680	regulation of tumor necrosis factor production	0.507063	0.408319	ENSG00000131016	1	AKAP12
GO:0048639	positive regulation of developmental growth	0.507063	0.408319	ENSG00000102678	1	FGF9
GO:0050821	protein stabilization	0.507063	0.408319	ENSG00000163132	1	MSX1
GO:0002698	negative regulation of immune effector process	0.508104	0.409157	ENSG00000103241	1	FOXF1
GO:1901343	negative regulation of vasculature development	0.508104	0.409157	ENSG00000102678	1	FGF9
GO:0007626	locomotory behavior	0.509555	0.410325	ENSG00000173406	1	DAB1
GO:0016051	carbohydrate biosynthetic process	0.511594	0.411968	ENSG00000170961	1	HAS2
GO:0032640	tumor necrosis factor production	0.511594	0.411968	ENSG00000131016	1	AKAP12
GO:0061013	regulation of mRNA catabolic process	0.511594	0.411968	ENSG00000168646	1	AXIN2
GO:1903555	regulation of tumor necrosis factor superfamily cytokine production	0.511594	0.411968	ENSG00000131016	1	AKAP12
GO:0006109	regulation of carbohydrate metabolic process	0.512182	0.412441	ENSG00000170961	1	HAS2
GO:0007623	circadian rhythm	0.512182	0.412441	ENSG00000179094	1	PER1
GO:0034764	positive regulation of transmembrane transport	0.512182	0.412441	ENSG00000134817	1	APLNR
GO:0046890	regulation of lipid biosynthetic process	0.515428	0.415055	ENSG00000019549	1	SNAI2
GO:0002695	negative regulation of leukocyte activation	0.518647	0.417648	ENSG00000103241	1	FOXF1
GO:0044272	sulfur compound biosynthetic process	0.519612	0.418425	ENSG00000175040	1	CHST2
GO:0071706	tumor necrosis factor superfamily cytokine production	0.519612	0.418425	ENSG00000131016	1	AKAP12
GO:0045766	positive regulation of angiogenesis	0.520992	0.419536	ENSG00000134817	1	APLNR
GO:0006323	DNA packaging	0.524156	0.422083	ENSG00000164104	1	HMGB2
GO:0006694	steroid biosynthetic process	0.527293	0.42461	ENSG00000019549	1	SNAI2
GO:0050920	regulation of chemotaxis	0.52821	0.425348	ENSG00000134853	1	PDGFRA
GO:1902115	regulation of organelle assembly	0.52821	0.425348	ENSG00000118007	1	STAG1
GO:2000377	regulation of reactive oxygen species metabolic process	0.531306	0.427841	ENSG00000069974	1	RAB27A
GO:0051321	meiotic cell cycle	0.532199	0.42856	ENSG00000163132	1	MSX1
GO:0071222	cellular response to lipopolysaccharide	0.532199	0.42856	ENSG00000164104	1	HMGB2
GO:1903708	positive regulation of hemopoiesis	0.535254	0.43102	ENSG00000164104	1	HMGB2
GO:0002064	epithelial cell development	0.537851	0.433111	ENSG00000111186	1	WNT5B
GO:0032886	regulation of microtubule-based process	0.537851	0.433111	ENSG00000118007	1	STAG1
GO:1903050	regulation of proteolysis involved in cellular protein catabolic process	0.539138	0.434148	ENSG00000007384	1	RHBDF1
GO:0007254	JNK cascade	0.540419	0.43518	ENSG00000179094	1	PER1
GO:0071219	cellular response to molecule of bacterial origin	0.543396	0.437577	ENSG00000164104	1	HMGB2
GO:0043523	regulation of neuron apoptotic process	0.544657	0.438592	ENSG00000103460	1	TOX3
GO:0050777	negative regulation of immune response	0.549279	0.442314	ENSG00000103241	1	FOXF1
GO:0031669	cellular response to nutrient levels	0.550072	0.442952	ENSG00000019549	1	SNAI2
GO:0051224	negative regulation of protein transport	0.550072	0.442952	ENSG00000007384	1	RHBDF1
GO:0007584	response to nutrient	0.551299	0.443941	ENSG00000019549	1	SNAI2
GO:0071456	cellular response to hypoxia	0.552519	0.444923	ENSG00000129474	1	AJUBA
GO:1904950	negative regulation of establishment of protein localization	0.558671	0.449877	ENSG00000007384	1	RHBDF1
GO:0001909	leukocyte mediated cytotoxicity	0.559413	0.450475	ENSG00000069974	1	RAB27A
GO:0065004	protein-DNA complex assembly	0.559413	0.450475	ENSG00000164104	1	HMGB2
GO:0098813	nuclear chromosome segregation	0.560595	0.451426	ENSG00000168646	1	AXIN2
GO:0032872	regulation of stress-activated MAPK cascade	0.561322	0.452012	ENSG00000179094	1	PER1
GO:1904018	positive regulation of vasculature development	0.561322	0.452012	ENSG00000134817	1	APLNR
GO:0002573	myeloid leukocyte differentiation	0.562043	0.452592	ENSG00000104415	1	CCN4
GO:0009755	hormone-mediated signaling pathway	0.562043	0.452592	ENSG00000179094	1	PER1
GO:0070302	regulation of stress-activated protein kinase signaling cascade	0.563204	0.453527	ENSG00000179094	1	PER1
GO:0042593	glucose homeostasis	0.564163	0.4543	ENSG00000104415	1	CCN4
GO:0006469	negative regulation of protein kinase activity	0.564163	0.4543	ENSG00000164086	1	DUSP7
GO:0033500	carbohydrate homeostasis	0.564163	0.4543	ENSG00000104415	1	CCN4
GO:0036294	cellular response to decreased oxygen levels	0.564163	0.4543	ENSG00000129474	1	AJUBA
GO:0071560	cellular response to transforming growth factor beta stimulus	0.564163	0.4543	ENSG00000128045	1	RASL11B
GO:0000302	response to reactive oxygen species	0.564411	0.454499	ENSG00000134853	1	PDGFRA
GO:0046474	glycerophospholipid biosynthetic process	0.564411	0.454499	ENSG00000129474	1	AJUBA
GO:0046578	regulation of Ras protein signal transduction	0.564411	0.454499	ENSG00000126822	1	PLEKHG3
GO:0032412	regulation of ion transmembrane transporter activity	0.565543	0.455411	ENSG00000152818	1	UTRN
GO:0007281	germ cell development	0.56779	0.45722	ENSG00000164104	1	HMGB2
GO:0050807	regulation of synapse organization	0.56779	0.45722	ENSG00000165300	1	SLITRK5
GO:0071216	cellular response to biotic stimulus	0.568904	0.458117	ENSG00000164104	1	HMGB2
GO:0071559	response to transforming growth factor beta	0.570011	0.459009	ENSG00000128045	1	RASL11B
GO:0050803	regulation of synapse structure or activity	0.574198	0.462381	ENSG00000165300	1	SLITRK5
GO:0022898	regulation of transmembrane transporter activity	0.57438	0.462527	ENSG00000152818	1	UTRN
GO:0042445	hormone metabolic process	0.57438	0.462527	ENSG00000134853	1	PDGFRA
GO:0051402	neuron apoptotic process	0.57438	0.462527	ENSG00000103460	1	TOX3
GO:0009266	response to temperature stimulus	0.575457	0.463394	ENSG00000138119	1	MYOF
GO:1903362	regulation of cellular protein catabolic process	0.576528	0.464257	ENSG00000007384	1	RHBDF1
GO:0140014	mitotic nuclear division	0.577141	0.46475	ENSG00000118007	1	STAG1
GO:1901617	organic hydroxy compound biosynthetic process	0.577141	0.46475	ENSG00000019549	1	SNAI2
GO:0006310	DNA recombination	0.577748	0.465239	ENSG00000164104	1	HMGB2
GO:0071383	cellular response to steroid hormone stimulus	0.577748	0.465239	ENSG00000179094	1	PER1
GO:0030217	T cell differentiation	0.5788	0.466086	ENSG00000184916	1	JAG2
GO:0071453	cellular response to oxygen levels	0.581339	0.468131	ENSG00000129474	1	AJUBA
GO:0051650	establishment of vesicle localization	0.582373	0.468964	ENSG00000069974	1	RAB27A
GO:0006486	protein glycosylation	0.585897	0.471801	ENSG00000164574	1	GALNT10
GO:0043413	macromolecule glycosylation	0.585897	0.471801	ENSG00000164574	1	GALNT10
GO:0050730	regulation of peptidyl-tyrosine phosphorylation	0.587915	0.473426	ENSG00000181467	1	RAP2B
GO:0090257	regulation of muscle system process	0.587915	0.473426	ENSG00000152818	1	UTRN
GO:0031668	cellular response to extracellular stimulus	0.589452	0.474664	ENSG00000019549	1	SNAI2
GO:0032409	regulation of transporter activity	0.589452	0.474664	ENSG00000152818	1	UTRN
GO:1901215	negative regulation of neuron death	0.589452	0.474664	ENSG00000103460	1	TOX3
GO:0071824	protein-DNA complex subunit organization	0.589984	0.475092	ENSG00000164104	1	HMGB2
GO:0097237	cellular response to toxic substance	0.589984	0.475092	ENSG00000163132	1	MSX1
GO:0016485	protein processing	0.591943	0.47667	ENSG00000135919	1	SERPINE2
GO:0031330	negative regulation of cellular catabolic process	0.591943	0.47667	ENSG00000168646	1	AXIN2
GO:0000086	G2/M transition of mitotic cell cycle	0.592457	0.477084	ENSG00000129474	1	AJUBA
GO:0048872	homeostasis of number of cells	0.592457	0.477084	ENSG00000164104	1	HMGB2
GO:0007611	learning or memory	0.594839	0.479002	ENSG00000134138	1	MEIS2
GO:0021700	developmental maturation	0.597202	0.480904	ENSG00000149922	1	TBX6
GO:0051924	regulation of calcium ion transport	0.598145	0.481664	ENSG00000134817	1	APLNR
GO:0045017	glycerolipid biosynthetic process	0.598623	0.482049	ENSG00000129474	1	AJUBA
GO:0070085	glycosylation	0.598623	0.482049	ENSG00000164574	1	GALNT10
GO:0006909	phagocytosis	0.599096	0.48243	ENSG00000069974	1	RAB27A
GO:0031334	positive regulation of protein complex assembly	0.599096	0.48243	ENSG00000129474	1	AJUBA
GO:0051648	vesicle localization	0.600022	0.483176	ENSG00000069974	1	RAB27A
GO:1903039	positive regulation of leukocyte cell-cell adhesion	0.60232	0.485026	ENSG00000170961	1	HAS2
GO:0043270	positive regulation of ion transport	0.605963	0.487959	ENSG00000134817	1	APLNR
GO:0008654	phospholipid biosynthetic process	0.612657	0.49335	ENSG00000129474	1	AJUBA
GO:0044839	cell cycle G2/M phase transition	0.612657	0.49335	ENSG00000129474	1	AJUBA
GO:0045927	positive regulation of growth	0.612657	0.49335	ENSG00000102678	1	FGF9
GO:0009410	response to xenobiotic stimulus	0.615706	0.495806	ENSG00000165300	1	SLITRK5
GO:0051403	stress-activated MAPK cascade	0.615706	0.495806	ENSG00000179094	1	PER1
GO:0007059	chromosome segregation	0.616556	0.49649	ENSG00000168646	1	AXIN2
GO:0090068	positive regulation of cell cycle process	0.617401	0.497171	ENSG00000163132	1	MSX1
GO:0072593	reactive oxygen species metabolic process	0.618241	0.497847	ENSG00000069974	1	RAB27A
GO:0016236	macroautophagy	0.620377	0.499567	ENSG00000163625	1	WDFY3
GO:0002699	positive regulation of immune effector process	0.620731	0.499852	ENSG00000103241	1	FOXF1
GO:0002703	regulation of leukocyte mediated immunity	0.620731	0.499852	ENSG00000103241	1	FOXF1
GO:0031098	stress-activated protein kinase signaling cascade	0.621551	0.500512	ENSG00000179094	1	PER1
GO:0090305	nucleic acid phosphodiester bond hydrolysis	0.623648	0.502201	ENSG00000164104	1	HMGB2
GO:0010632	regulation of epithelial cell migration	0.625728	0.503875	ENSG00000170961	1	HAS2
GO:0071103	DNA conformation change	0.626524	0.504516	ENSG00000164104	1	HMGB2
GO:0042742	defense response to bacterium	0.626841	0.504772	ENSG00000164104	1	HMGB2
GO:0051235	maintenance of location	0.626841	0.504772	ENSG00000134817	1	APLNR
GO:0030100	regulation of endocytosis	0.627154	0.505024	ENSG00000069974	1	RAB27A
GO:0050714	positive regulation of protein secretion	0.627154	0.505024	ENSG00000131016	1	AKAP12
GO:0031647	regulation of protein stability	0.629185	0.506659	ENSG00000163132	1	MSX1
GO:0032956	regulation of actin cytoskeleton organization	0.629956	0.507281	ENSG00000134853	1	PDGFRA
GO:0001906	cell killing	0.630723	0.507898	ENSG00000069974	1	RAB27A
GO:0002460	adaptive immune response based on somatic recombination of immune receptors built from immunoglobulin superfamily domains	0.631485	0.508512	ENSG00000069974	1	RAB27A
GO:0070588	calcium ion transmembrane transport	0.632243	0.509122	ENSG00000134817	1	APLNR
GO:0071214	cellular response to abiotic stimulus	0.639806	0.515213	ENSG00000019549	1	SNAI2
GO:0104004	cellular response to environmental stimulus	0.639806	0.515213	ENSG00000019549	1	SNAI2
GO:0006913	nucleocytoplasmic transport	0.644111	0.518679	ENSG00000102678	1	FGF9
GO:0002793	positive regulation of peptide secretion	0.645514	0.519809	ENSG00000131016	1	AKAP12
GO:0032147	activation of protein kinase activity	0.645514	0.519809	ENSG00000164086	1	DUSP7
GO:0034599	cellular response to oxidative stress	0.645727	0.51998	ENSG00000134853	1	PDGFRA
GO:0051169	nuclear transport	0.645727	0.51998	ENSG00000102678	1	FGF9
GO:0022409	positive regulation of cell-cell adhesion	0.646417	0.520536	ENSG00000170961	1	HAS2
GO:0051604	protein maturation	0.647103	0.521088	ENSG00000135919	1	SERPINE2
GO:0002478	antigen processing and presentation of exogenous peptide antigen	0.647785	0.521637	ENSG00000182287	1	AP1S2
GO:0019884	antigen processing and presentation of exogenous antigen	0.649619	0.523114	ENSG00000182287	1	AP1S2
GO:0031348	negative regulation of defense response	0.650288	0.523653	ENSG00000103241	1	FOXF1
GO:0071496	cellular response to external stimulus	0.654378	0.526946	ENSG00000019549	1	SNAI2
GO:0022412	cellular process involved in reproduction in multicellular organism	0.655026	0.527468	ENSG00000164104	1	HMGB2
GO:0009101	glycoprotein biosynthetic process	0.656796	0.528894	ENSG00000164574	1	GALNT10
GO:0048638	regulation of developmental growth	0.659668	0.531206	ENSG00000102678	1	FGF9
GO:0048002	antigen processing and presentation of peptide antigen	0.660291	0.531708	ENSG00000182287	1	AP1S2
GO:0006650	glycerophospholipid metabolic process	0.663117	0.533984	ENSG00000129474	1	AJUBA
GO:0006470	protein dephosphorylation	0.665911	0.536233	ENSG00000164086	1	DUSP7
GO:0030098	lymphocyte differentiation	0.666505	0.536712	ENSG00000184916	1	JAG2
GO:0032970	regulation of actin filament-based process	0.6714	0.540654	ENSG00000134853	1	PDGFRA
GO:0030336	negative regulation of cell migration	0.671972	0.541114	ENSG00000181467	1	RAP2B
GO:0043547	positive regulation of GTPase activity	0.674159	0.542876	ENSG00000071205	1	ARHGAP10
GO:0045861	negative regulation of proteolysis	0.674159	0.542876	ENSG00000135919	1	SERPINE2
GO:0006066	alcohol metabolic process	0.679934	0.547526	ENSG00000138119	1	MYOF
GO:0010631	epithelial cell migration	0.680467	0.547955	ENSG00000170961	1	HAS2
GO:0006790	sulfur compound metabolic process	0.680997	0.548381	ENSG00000175040	1	CHST2
GO:0090132	epithelium migration	0.682546	0.549629	ENSG00000170961	1	HAS2
GO:1903037	regulation of leukocyte cell-cell adhesion	0.684081	0.550865	ENSG00000170961	1	HAS2
GO:2000146	negative regulation of cell motility	0.684591	0.551276	ENSG00000181467	1	RAP2B
GO:0032103	positive regulation of response to external stimulus	0.686101	0.552492	ENSG00000104415	1	CCN4
GO:0000377	RNA splicing, via transesterification reactions with bulged adenosine as nucleophile	0.686101	0.552492	ENSG00000131773	1	KHDRBS3
GO:0000398	mRNA splicing, via spliceosome	0.686101	0.552492	ENSG00000131773	1	KHDRBS3
GO:0000375	RNA splicing, via transesterification reactions	0.689577	0.555291	ENSG00000131773	1	KHDRBS3
GO:0007568	aging	0.693001	0.558048	ENSG00000080839	1	RBL1
GO:0019932	second-messenger-mediated signaling	0.697338	0.561541	ENSG00000134817	1	APLNR
GO:1901214	regulation of neuron death	0.699628	0.563385	ENSG00000103460	1	TOX3
GO:0001666	response to hypoxia	0.699628	0.563385	ENSG00000129474	1	AJUBA
GO:0051271	negative regulation of cellular component movement	0.699628	0.563385	ENSG00000181467	1	RAP2B
GO:0043687	post-translational protein modification	0.701008	0.564496	ENSG00000169439	1	SDC2
GO:0035690	cellular response to drug	0.701438	0.564842	ENSG00000163132	1	MSX1
GO:0045765	regulation of angiogenesis	0.706509	0.568926	ENSG00000134817	1	APLNR
GO:0006402	mRNA catabolic process	0.706916	0.569253	ENSG00000168646	1	AXIN2
GO:0036293	response to decreased oxygen levels	0.708233	0.570314	ENSG00000129474	1	AJUBA
GO:0007159	leukocyte cell-cell adhesion	0.708629	0.570633	ENSG00000170961	1	HAS2
GO:0009913	epidermal cell differentiation	0.71083	0.572405	ENSG00000184916	1	JAG2
GO:0002449	lymphocyte mediated immunity	0.711213	0.572714	ENSG00000069974	1	RAB27A
GO:0009100	glycoprotein metabolic process	0.714634	0.575468	ENSG00000164574	1	GALNT10
GO:0032386	regulation of intracellular transport	0.714634	0.575468	ENSG00000103241	1	FOXF1
GO:0010498	proteasomal protein catabolic process	0.721775	0.581219	ENSG00000007384	1	RHBDF1
GO:0040013	negative regulation of locomotion	0.721775	0.581219	ENSG00000181467	1	RAP2B
GO:0070997	neuron death	0.721775	0.581219	ENSG00000103460	1	TOX3
GO:0006417	regulation of translation	0.722961	0.582174	ENSG00000179094	1	PER1
GO:0070482	response to oxygen levels	0.724135	0.583119	ENSG00000129474	1	AJUBA
GO:0006401	RNA catabolic process	0.726758	0.585232	ENSG00000168646	1	AXIN2
GO:0046486	glycerolipid metabolic process	0.726758	0.585232	ENSG00000129474	1	AJUBA
GO:0051052	regulation of DNA metabolic process	0.726758	0.585232	ENSG00000168646	1	AXIN2
GO:0046394	carboxylic acid biosynthetic process	0.74002	0.595911	ENSG00000170961	1	HAS2
GO:0016053	organic acid biosynthetic process	0.740277	0.596118	ENSG00000170961	1	HAS2
GO:0043254	regulation of protein complex assembly	0.742097	0.597583	ENSG00000129474	1	AJUBA
GO:0006816	calcium ion transport	0.745437	0.600273	ENSG00000134817	1	APLNR
GO:0050900	leukocyte migration	0.747197	0.60169	ENSG00000169439	1	SDC2
GO:0051222	positive regulation of protein transport	0.747421	0.601871	ENSG00000131016	1	AKAP12
GO:0043588	skin development	0.760187	0.612151	ENSG00000165300	1	SLITRK5
GO:0034248	regulation of cellular amide metabolic process	0.761077	0.612868	ENSG00000179094	1	PER1
GO:0008380	RNA splicing	0.761246	0.613004	ENSG00000131773	1	KHDRBS3
GO:0006979	response to oxidative stress	0.763533	0.614845	ENSG00000134853	1	PDGFRA
GO:0031667	response to nutrient levels	0.766623	0.617333	ENSG00000019549	1	SNAI2
GO:0072594	establishment of protein localization to organelle	0.766623	0.617333	ENSG00000102678	1	FGF9

## Sheet: -2000 to +500 bp
Gene Name	Peak Value	log2FoldChange	padj
MSGN1	339	-8.01209	0.000419792
CCDC141	174	-7.03887	2.01207e-05
WISP1	239	-5.92314	3.63348e-06
HOXD1	114	-5.86251	0.000113501
HOXD3	203	-5.75675	0.00146043
UNC5C	276	-5.25012	3.04598e-11
VWA2	150	-5.2076	0.000301593
KCNJ5	156	-4.98955	0.000945934
TBX6	126	-4.9267	1.39852e-34
HES7	311	-4.38883	5.70446e-05
SNAI2	33	-4.1118	1.00365e-31
ITGB8	75	-3.9938	1.9302e-28
ALOXE3	311	-3.89	0.0362736
FOXF1	181	-3.56471	0.0269947
FLJ12825	226	-3.51267	0.00757976
DLL3	86	-3.41991	6.38945e-08
HOXA-AS3	181	-3.30651	0.00959368
CITED1	65	-3.30351	0.0141708
WNT3A	150	-3.25618	7.57641e-06
APLNR	177	-3.2429	0.00029504
DISP2	37	-3.057	0.0013179
FGF8	160	-2.94278	0.0493107
TCERG1L	143	-2.83995	0.0420946
HES4	39	-2.75009	7.6071e-05
KCNJ3	47	-2.73747	0.0274921
HOXC5	154	-2.56935	0.00147808
FGF17	145	-2.50205	0.000979385
FGF9	41	-2.49586	0.0458614
PDGFRA	170	-2.42211	1.07555e-05
CDH11	140	-2.41173	1.30753e-07
ARHGAP10	129	-2.40597	0.0110921
MYOF	235	-2.34037	2.47776e-11
HOXA2	173	-2.32141	2.37007e-06
HAS2	90	-2.13513	4.73267e-06
TENM1	170	-2.01313	0.00611567
MSX1	70	-2.01305	7.57641e-06
EOGT	200	-1.96809	0.0135123
ZNF703	27	-1.93583	5.94107e-06
EPHA4	167	-1.92673	6.38945e-08
CACNA1I	155	-1.92417	0.0126272
MEIS2	206	-1.83117	0.0095987
CHST2	44	-1.66723	2.14672e-09
HHIPL2	98	-1.64777	0.0013179
SERPINE2	74	-1.64099	1.12744e-10
SLITRK5	43	-1.63161	8.66731e-30
HOXB7	116	-1.61842	0.02633
RHBDF1	124	-1.48246	0.000114512
MLLT3	182	-1.43536	0.00696506
CDH24	27	-1.38052	0.000139373
PLP1	130	-1.37738	8.39503e-07
PKNOX2	201	-1.37147	0.000574966
LINC00458	36	-1.33738	2.15796e-05
HOXB5	82	-1.29947	0.020088
EVX1	170	-1.23726	0.00257521
RAB27A	22	-1.21783	0.000415125
HOXB2	89	-1.21035	0.0115685
FOSL2	27	-1.19039	0.0234729
TBXT	184	-1.17802	0.00288099
RASL11B	62	-1.16118	9.51737e-10
GALNT10	183	-1.14278	0.00249248
PLEKHG3	87	-1.12771	0.0125874
NOTCH1	165	-1.11499	0.0269947
AJUBA	46	-1.11023	0.0142507
PER1	64	-1.08217	0.00157784
LEF1	108	-1.06164	0.020088
NID2	59	-1.05726	0.00906649
UQCR11	25	-1.02923	6.63893e-08
PHLDA1	59	-1.0273	0.0091514
DMTN	145	-0.971767	0.0376807
SMC6	229	-0.966231	5.80407e-06
KHDRBS3	55	-0.960882	0.0148154
CDX1	64	-0.943038	0.00576303
SDC2	45	-0.938214	0.00153829
COL5A1	88	-0.925785	0.02633
HMGB2	33	-0.914767	3.60942e-05
HOXA1	173	-0.832803	4.99351e-06
CNOT11	53	-0.83244	6.96726e-08
SH2B3	163	-0.810912	0.00584591
ADGRL2	209	-0.800887	3.33275e-06
DUSP7	24	-0.798399	0.00312061
WNT5B	270	-0.795515	0.0187145
GEN1	229	-0.773262	0.0266387
AMOTL2	132	-0.74999	5.23168e-06
DYRK3	45	-0.712148	0.0228313
TLE3	113	-0.711182	0.00270722
SHISA6	56	-0.66559	0.0115685
RAP2B	30	-0.652703	0.0263916
SP8	195	-0.621514	0.0486327
AXIN2	152	-0.612181	0.00104972
AKAP12	33	-0.58864	0.0179023
SALL1	121	-0.581618	0.0117641
BCL7C	84	-0.58022	0.0266449
RQCD1	37	-0.564824	0.0235746
STAG1	36	-0.547575	0.0329956
CYYR1	29	-0.541282	0.0437026
PRTG	114	-0.526352	0.00146043
AP1S2	29	-0.508993	0.0296489
STEAP2	29	0.59765	0.0297083
RBL1	38	0.604395	0.00359413
MMP15	36	0.615601	0.0374483
WDFY3	27	0.630462	0.0252764
GADD45A	26	0.666533	0.0208071
FAM212B	141	0.765226	0.00818077
LRIG1	109	0.802066	0.0102949
GBX2	85	0.81204	6.38678e-05
JAG2	17	0.844555	0.0060993
TOX3	86	0.852276	0.0107625
UTRN	69	0.874069	0.00078744
CDKN1C	90	0.928816	0.000168579
PCDH18	55	0.956859	0.00437245
DAB1	220	0.964232	4.70902e-07
ACCS	48	1.01528	0.0349023
DMXL1	34	1.03681	1.37334e-05
YBX2	25	1.05383	0.0240557
ATP1A2	74	1.06095	0.00202103
PCDH1	45	1.12735	0.000788249
EFNB2	30	1.16003	2.17044e-05
ZBTB7B	34	1.24836	0.00199661
PBX3	208	1.35453	0.0145364
KLHL4	69	1.49052	0.0115478
FAM101A	59	1.5278	0.00794342
PKDCC	187	1.60248	0.0108003
SPOCK2	38	1.86284	0.00274395
GATA6	68	2.9256	0.00340635
NODAL	40	3.6623	2.58445e-07

## Sheet: GO-BP (-2000 to +500bp)
ID	Description	p.adjust	qvalue	geneID	Count
GO:0007389	pattern specification process	1.11566e-11	8.72642e-12	ENSG00000156574/ENSG00000167081/ENSG00000168505/ENSG00000168646/ENSG00000164651/ENSG00000113722/ENSG00000148400/ENSG00000164458/ENSG00000173917/ENSG00000106038/ENSG00000171843/ENSG00000163132/ENSG00000105996/ENSG00000107831/ENSG00000154342/ENSG00000125931/ENSG00000090932/ENSG00000103241/ENSG00000179111/ENSG00000149922/ENSG00000128652/ENSG00000151379	22	NODAL/PBX3/GBX2/AXIN2/SP8/CDX1/NOTCH1/TBXT/HOXB2/EVX1/MLLT3/MSX1/HOXA2/FGF8/WNT3A/CITED1/DLL3/FOXF1/HES7/TBX6/HOXD3/MSGN1
GO:0003002	regionalization	1.11566e-11	8.72642e-12	ENSG00000156574/ENSG00000167081/ENSG00000168505/ENSG00000168646/ENSG00000164651/ENSG00000113722/ENSG00000164458/ENSG00000173917/ENSG00000106038/ENSG00000171843/ENSG00000163132/ENSG00000105996/ENSG00000107831/ENSG00000154342/ENSG00000090932/ENSG00000103241/ENSG00000179111/ENSG00000149922/ENSG00000128652/ENSG00000151379	20	NODAL/PBX3/GBX2/AXIN2/SP8/CDX1/TBXT/HOXB2/EVX1/MLLT3/MSX1/HOXA2/FGF8/WNT3A/DLL3/FOXF1/HES7/TBX6/HOXD3/MSGN1
GO:0048568	embryonic organ development	1.47831e-11	1.1563e-11	ENSG00000156574/ENSG00000162878/ENSG00000273707/ENSG00000168505/ENSG00000144749/ENSG00000103449/ENSG00000111252/ENSG00000105991/ENSG00000148400/ENSG00000164458/ENSG00000173917/ENSG00000120075/ENSG00000260027/ENSG00000163132/ENSG00000105996/ENSG00000134853/ENSG00000102678/ENSG00000107831/ENSG00000154342/ENSG00000125931/ENSG00000103241/ENSG00000128652	22	NODAL/PKDCC/CDKN1C/GBX2/LRIG1/SALL1/SH2B3/HOXA1/NOTCH1/TBXT/HOXB2/HOXB5/HOXB7/MSX1/HOXA2/PDGFRA/FGF9/FGF8/WNT3A/CITED1/FOXF1/HOXD3
GO:0009952	anterior/posterior pattern specification	1.62885e-11	1.27405e-11	ENSG00000156574/ENSG00000167081/ENSG00000168505/ENSG00000168646/ENSG00000113722/ENSG00000164458/ENSG00000173917/ENSG00000171843/ENSG00000163132/ENSG00000107831/ENSG00000154342/ENSG00000090932/ENSG00000103241/ENSG00000179111/ENSG00000149922/ENSG00000128652	16	NODAL/PBX3/GBX2/AXIN2/CDX1/TBXT/HOXB2/MLLT3/MSX1/FGF8/WNT3A/DLL3/FOXF1/HES7/TBX6/HOXD3
GO:0048562	embryonic organ morphogenesis	5.52087e-11	4.31829e-11	ENSG00000156574/ENSG00000168505/ENSG00000144749/ENSG00000103449/ENSG00000105991/ENSG00000148400/ENSG00000164458/ENSG00000173917/ENSG00000120075/ENSG00000260027/ENSG00000163132/ENSG00000105996/ENSG00000134853/ENSG00000102678/ENSG00000107831/ENSG00000154342/ENSG00000103241/ENSG00000128652	18	NODAL/GBX2/LRIG1/SALL1/HOXA1/NOTCH1/TBXT/HOXB2/HOXB5/HOXB7/MSX1/HOXA2/PDGFRA/FGF9/FGF8/WNT3A/FOXF1/HOXD3
GO:0048706	embryonic skeletal system development	3.14313e-09	2.45848e-09	ENSG00000156574/ENSG00000105991/ENSG00000164458/ENSG00000173917/ENSG00000120075/ENSG00000260027/ENSG00000105996/ENSG00000134853/ENSG00000102678/ENSG00000172789/ENSG00000128652/ENSG00000128645	12	NODAL/HOXA1/TBXT/HOXB2/HOXB5/HOXB7/HOXA2/PDGFRA/FGF9/HOXC5/HOXD3/HOXD1
GO:0035282	segmentation	3.52788e-09	2.75942e-09	ENSG00000168646/ENSG00000113722/ENSG00000164458/ENSG00000171843/ENSG00000105996/ENSG00000154342/ENSG00000090932/ENSG00000103241/ENSG00000179111/ENSG00000149922/ENSG00000151379	11	AXIN2/CDX1/TBXT/MLLT3/HOXA2/WNT3A/DLL3/FOXF1/HES7/TBX6/MSGN1
GO:0048705	skeletal system morphogenesis	9.65121e-08	7.54894e-08	ENSG00000156574/ENSG00000168646/ENSG00000105991/ENSG00000113722/ENSG00000164458/ENSG00000173917/ENSG00000120075/ENSG00000260027/ENSG00000163132/ENSG00000170961/ENSG00000105996/ENSG00000134853/ENSG00000128652	13	NODAL/AXIN2/HOXA1/CDX1/TBXT/HOXB2/HOXB5/HOXB7/MSX1/HAS2/HOXA2/PDGFRA/HOXD3
GO:0060485	mesenchyme development	1.52804e-07	1.1952e-07	ENSG00000156574/ENSG00000168505/ENSG00000168646/ENSG00000138795/ENSG00000148400/ENSG00000183779/ENSG00000163132/ENSG00000170961/ENSG00000102678/ENSG00000107831/ENSG00000154342/ENSG00000090932/ENSG00000103241/ENSG00000019549	14	NODAL/GBX2/AXIN2/LEF1/NOTCH1/ZNF703/MSX1/HAS2/FGF9/FGF8/WNT3A/DLL3/FOXF1/SNAI2
GO:0001756	somitogenesis	9.02643e-07	7.06025e-07	ENSG00000168646/ENSG00000113722/ENSG00000164458/ENSG00000154342/ENSG00000090932/ENSG00000103241/ENSG00000179111/ENSG00000149922	8	AXIN2/CDX1/TBXT/WNT3A/DLL3/FOXF1/HES7/TBX6
GO:0061053	somite development	6.38251e-06	4.99224e-06	ENSG00000168646/ENSG00000113722/ENSG00000164458/ENSG00000154342/ENSG00000090932/ENSG00000103241/ENSG00000179111/ENSG00000149922	8	AXIN2/CDX1/TBXT/WNT3A/DLL3/FOXF1/HES7/TBX6
GO:0003007	heart morphogenesis	6.38251e-06	4.99224e-06	ENSG00000156574/ENSG00000141448/ENSG00000168646/ENSG00000130635/ENSG00000148400/ENSG00000164458/ENSG00000163132/ENSG00000170961/ENSG00000107831/ENSG00000154342/ENSG00000103241/ENSG00000019549	12	NODAL/GATA6/AXIN2/COL5A1/NOTCH1/TBXT/MSX1/HAS2/FGF8/WNT3A/FOXF1/SNAI2
GO:0048704	embryonic skeletal system morphogenesis	8.97314e-06	7.01857e-06	ENSG00000156574/ENSG00000105991/ENSG00000173917/ENSG00000120075/ENSG00000260027/ENSG00000105996/ENSG00000134853/ENSG00000128652	8	NODAL/HOXA1/HOXB2/HOXB5/HOXB7/HOXA2/PDGFRA/HOXD3
GO:0042471	ear morphogenesis	9.71704e-06	7.60043e-06	ENSG00000168505/ENSG00000144749/ENSG00000103449/ENSG00000105991/ENSG00000163132/ENSG00000105996/ENSG00000102678/ENSG00000107831/ENSG00000154342	9	GBX2/LRIG1/SALL1/HOXA1/MSX1/HOXA2/FGF9/FGF8/WNT3A
GO:0023019	signal transduction involved in regulation of gene expression	1.13042e-05	8.84186e-06	ENSG00000164458/ENSG00000163132/ENSG00000134853/ENSG00000107831/ENSG00000149922	5	TBXT/MSX1/PDGFRA/FGF8/TBX6
GO:0007369	gastrulation	3.46921e-05	2.71353e-05	ENSG00000156574/ENSG00000141448/ENSG00000102996/ENSG00000130635/ENSG00000164458/ENSG00000107831/ENSG00000134817/ENSG00000154342/ENSG00000103241/ENSG00000149922	10	NODAL/GATA6/MMP15/COL5A1/TBXT/FGF8/APLNR/WNT3A/FOXF1/TBX6
GO:0001570	vasculogenesis	5.35977e-05	4.19228e-05	ENSG00000148400/ENSG00000164458/ENSG00000170961/ENSG00000134817/ENSG00000125931/ENSG00000103241/ENSG00000105855	7	NOTCH1/TBXT/HAS2/APLNR/CITED1/FOXF1/ITGB8
GO:0055123	digestive system development	6.50385e-05	5.08716e-05	ENSG00000156574/ENSG00000141448/ENSG00000162878/ENSG00000173406/ENSG00000273707/ENSG00000103449/ENSG00000134853/ENSG00000102678/ENSG00000103241	9	NODAL/GATA6/PKDCC/DAB1/CDKN1C/SALL1/PDGFRA/FGF9/FOXF1
GO:0072132	mesenchyme morphogenesis	6.68139e-05	5.22602e-05	ENSG00000148400/ENSG00000163132/ENSG00000107831/ENSG00000154342/ENSG00000103241/ENSG00000019549	6	NOTCH1/MSX1/FGF8/WNT3A/FOXF1/SNAI2
GO:0048732	gland development	7.83726e-05	6.13012e-05	ENSG00000156574/ENSG00000141448/ENSG00000160685/ENSG00000273707/ENSG00000103449/ENSG00000135919/ENSG00000183779/ENSG00000163132/ENSG00000134853/ENSG00000107831/ENSG00000154342/ENSG00000103241/ENSG00000019549/ENSG00000128652	14	NODAL/GATA6/ZBTB7B/CDKN1C/SALL1/SERPINE2/ZNF703/MSX1/PDGFRA/FGF8/WNT3A/FOXF1/SNAI2/HOXD3
GO:0034109	homotypic cell-cell adhesion	7.83726e-05	6.13012e-05	ENSG00000181467/ENSG00000111252/ENSG00000158856/ENSG00000135919/ENSG00000183779/ENSG00000134853/ENSG00000154342	7	RAP2B/SH2B3/DMTN/SERPINE2/ZNF703/PDGFRA/WNT3A
GO:0060317	cardiac epithelial to mesenchymal transition	0.000123607	9.66824e-05	ENSG00000148400/ENSG00000163132/ENSG00000170961/ENSG00000107831/ENSG00000019549	5	NOTCH1/MSX1/HAS2/FGF8/SNAI2
GO:0043583	ear development	0.000123607	9.66824e-05	ENSG00000184916/ENSG00000168505/ENSG00000144749/ENSG00000103449/ENSG00000105991/ENSG00000163132/ENSG00000105996/ENSG00000102678/ENSG00000107831/ENSG00000154342	10	JAG2/GBX2/LRIG1/SALL1/HOXA1/MSX1/HOXA2/FGF9/FGF8/WNT3A
GO:0001704	formation of primary germ layer	0.000126017	9.85678e-05	ENSG00000156574/ENSG00000141448/ENSG00000102996/ENSG00000130635/ENSG00000164458/ENSG00000154342/ENSG00000103241/ENSG00000149922	8	NODAL/GATA6/MMP15/COL5A1/TBXT/WNT3A/FOXF1/TBX6
GO:0060562	epithelial tube morphogenesis	0.000127828	9.99839e-05	ENSG00000156574/ENSG00000125266/ENSG00000168505/ENSG00000103449/ENSG00000148400/ENSG00000164458/ENSG00000260027/ENSG00000116106/ENSG00000107831/ENSG00000154342/ENSG00000125931/ENSG00000103241	12	NODAL/EFNB2/GBX2/SALL1/NOTCH1/TBXT/HOXB7/EPHA4/FGF8/WNT3A/CITED1/FOXF1
GO:0007498	mesoderm development	0.000130045	0.000101718	ENSG00000156574/ENSG00000164458/ENSG00000107831/ENSG00000154342/ENSG00000090932/ENSG00000103241/ENSG00000179111/ENSG00000149922	8	NODAL/TBXT/FGF8/WNT3A/DLL3/FOXF1/HES7/TBX6
GO:0060021	roof of mouth development	0.000130045	0.000101718	ENSG00000162878/ENSG00000184916/ENSG00000138795/ENSG00000163132/ENSG00000134853/ENSG00000154342/ENSG00000019549	7	PKDCC/JAG2/LEF1/MSX1/PDGFRA/WNT3A/SNAI2
GO:0030111	regulation of Wnt signaling pathway	0.000165583	0.000129515	ENSG00000103449/ENSG00000168646/ENSG00000188803/ENSG00000111186/ENSG00000138795/ENSG00000171843/ENSG00000183779/ENSG00000102678/ENSG00000154342/ENSG00000125931/ENSG00000019549/ENSG00000104415	12	SALL1/AXIN2/SHISA6/WNT5B/LEF1/MLLT3/ZNF703/FGF9/WNT3A/CITED1/SNAI2/CCN4
GO:0051216	cartilage development	0.000165583	0.000129515	ENSG00000162878/ENSG00000168646/ENSG00000111186/ENSG00000163132/ENSG00000102678/ENSG00000105855/ENSG00000019549/ENSG00000128652/ENSG00000104415	9	PKDCC/AXIN2/WNT5B/MSX1/FGF9/ITGB8/SNAI2/HOXD3/CCN4
GO:0070527	platelet aggregation	0.000165583	0.000129515	ENSG00000181467/ENSG00000111252/ENSG00000158856/ENSG00000135919/ENSG00000134853/ENSG00000154342	6	RAP2B/SH2B3/DMTN/SERPINE2/PDGFRA/WNT3A
GO:0003198	epithelial to mesenchymal transition involved in endocardial cushion formation	0.000193178	0.000151099	ENSG00000148400/ENSG00000163132/ENSG00000107831/ENSG00000019549	4	NOTCH1/MSX1/FGF8/SNAI2
GO:0061448	connective tissue development	0.000193178	0.000151099	ENSG00000162878/ENSG00000168646/ENSG00000111186/ENSG00000130635/ENSG00000163132/ENSG00000102678/ENSG00000105855/ENSG00000019549/ENSG00000128652/ENSG00000104415	10	PKDCC/AXIN2/WNT5B/COL5A1/MSX1/FGF9/ITGB8/SNAI2/HOXD3/CCN4
GO:0001837	epithelial to mesenchymal transition	0.000193543	0.000151385	ENSG00000168646/ENSG00000138795/ENSG00000148400/ENSG00000183779/ENSG00000163132/ENSG00000170961/ENSG00000107831/ENSG00000019549	8	AXIN2/LEF1/NOTCH1/ZNF703/MSX1/HAS2/FGF8/SNAI2
GO:0048565	digestive tract development	0.000197548	0.000154517	ENSG00000156574/ENSG00000141448/ENSG00000162878/ENSG00000173406/ENSG00000103449/ENSG00000134853/ENSG00000102678/ENSG00000103241	8	NODAL/GATA6/PKDCC/DAB1/SALL1/PDGFRA/FGF9/FOXF1
GO:0048762	mesenchymal cell differentiation	0.000256368	0.000200525	ENSG00000168505/ENSG00000168646/ENSG00000138795/ENSG00000148400/ENSG00000183779/ENSG00000163132/ENSG00000170961/ENSG00000107831/ENSG00000019549	9	GBX2/AXIN2/LEF1/NOTCH1/ZNF703/MSX1/HAS2/FGF8/SNAI2
GO:0021675	nerve development	0.000351684	0.000275078	ENSG00000144749/ENSG00000103449/ENSG00000105991/ENSG00000173917/ENSG00000135919/ENSG00000128652	6	LRIG1/SALL1/HOXA1/HOXB2/SERPINE2/HOXD3
GO:0060070	canonical Wnt signaling pathway	0.000352556	0.000275761	ENSG00000168646/ENSG00000188803/ENSG00000111186/ENSG00000138795/ENSG00000164458/ENSG00000171843/ENSG00000183779/ENSG00000102678/ENSG00000107831/ENSG00000154342/ENSG00000019549	11	AXIN2/SHISA6/WNT5B/LEF1/TBXT/MLLT3/ZNF703/FGF9/FGF8/WNT3A/SNAI2
GO:0010721	negative regulation of cell development	0.000352955	0.000276073	ENSG00000156574/ENSG00000125266/ENSG00000173406/ENSG00000166450/ENSG00000158856/ENSG00000148400/ENSG00000116106/ENSG00000105996/ENSG00000154342/ENSG00000090932/ENSG00000149922	11	NODAL/EFNB2/DAB1/PRTG/DMTN/NOTCH1/EPHA4/HOXA2/WNT3A/DLL3/TBX6
GO:0090596	sensory organ morphogenesis	0.000364558	0.000285148	ENSG00000168505/ENSG00000144749/ENSG00000103449/ENSG00000105991/ENSG00000130635/ENSG00000163132/ENSG00000105996/ENSG00000102678/ENSG00000107831/ENSG00000154342	10	GBX2/LRIG1/SALL1/HOXA1/COL5A1/MSX1/HOXA2/FGF9/FGF8/WNT3A
GO:0003197	endocardial cushion development	0.000440455	0.000344514	ENSG00000148400/ENSG00000163132/ENSG00000107831/ENSG00000103241/ENSG00000019549	5	NOTCH1/MSX1/FGF8/FOXF1/SNAI2
GO:0048566	embryonic digestive tract development	0.000579487	0.000453261	ENSG00000162878/ENSG00000103449/ENSG00000134853/ENSG00000102678/ENSG00000103241	5	PKDCC/SALL1/PDGFRA/FGF9/FOXF1
GO:0035270	endocrine system development	0.000579487	0.000453261	ENSG00000141448/ENSG00000273707/ENSG00000103449/ENSG00000163132/ENSG00000134853/ENSG00000107831/ENSG00000128652	7	GATA6/CDKN1C/SALL1/MSX1/PDGFRA/FGF8/HOXD3
GO:0003272	endocardial cushion formation	0.000606598	0.000474467	ENSG00000148400/ENSG00000163132/ENSG00000107831/ENSG00000019549	4	NOTCH1/MSX1/FGF8/SNAI2
GO:0010002	cardioblast differentiation	0.000606598	0.000474467	ENSG00000141448/ENSG00000148400/ENSG00000164458/ENSG00000154342	4	GATA6/NOTCH1/TBXT/WNT3A
GO:0001649	osteoblast differentiation	0.000776421	0.000607297	ENSG00000168646/ENSG00000138795/ENSG00000148400/ENSG00000105996/ENSG00000102678/ENSG00000154342/ENSG00000125931/ENSG00000019549/ENSG00000104415	9	AXIN2/LEF1/NOTCH1/HOXA2/FGF9/WNT3A/CITED1/SNAI2/CCN4
GO:0034110	regulation of homotypic cell-cell adhesion	0.000801309	0.000626764	ENSG00000111252/ENSG00000158856/ENSG00000135919/ENSG00000183779	4	SH2B3/DMTN/SERPINE2/ZNF703
GO:0072001	renal system development	0.000801309	0.000626764	ENSG00000125266/ENSG00000273707/ENSG00000103449/ENSG00000260027/ENSG00000116106/ENSG00000170961/ENSG00000134853/ENSG00000107831/ENSG00000125931/ENSG00000103241	10	EFNB2/CDKN1C/SALL1/HOXB7/EPHA4/HAS2/PDGFRA/FGF8/CITED1/FOXF1
GO:0090100	positive regulation of transmembrane receptor protein serine/threonine kinase signaling pathway	0.000974403	0.000762155	ENSG00000156574/ENSG00000273707/ENSG00000148400/ENSG00000163132/ENSG00000102678/ENSG00000125931	6	NODAL/CDKN1C/NOTCH1/MSX1/FGF9/CITED1
GO:0009953	dorsal/ventral pattern formation	0.00101404	0.000793154	ENSG00000164651/ENSG00000173917/ENSG00000106038/ENSG00000105996/ENSG00000107831/ENSG00000154342	6	SP8/HOXB2/EVX1/HOXA2/FGF8/WNT3A
GO:0045165	cell fate commitment	0.00111852	0.000874883	ENSG00000156574/ENSG00000141448/ENSG00000160685/ENSG00000184916/ENSG00000106038/ENSG00000105996/ENSG00000107831/ENSG00000154342/ENSG00000149922	9	NODAL/GATA6/ZBTB7B/JAG2/EVX1/HOXA2/FGF8/WNT3A/TBX6
GO:0002062	chondrocyte differentiation	0.00128831	0.00100769	ENSG00000162878/ENSG00000168646/ENSG00000111186/ENSG00000102678/ENSG00000019549/ENSG00000104415	6	PKDCC/AXIN2/WNT5B/FGF9/SNAI2/CCN4
GO:0010543	regulation of platelet activation	0.00128831	0.00100769	ENSG00000111252/ENSG00000158856/ENSG00000135919/ENSG00000134853	4	SH2B3/DMTN/SERPINE2/PDGFRA
GO:0060348	bone development	0.0013538	0.00105891	ENSG00000168646/ENSG00000111252/ENSG00000113722/ENSG00000164458/ENSG00000163132/ENSG00000170961/ENSG00000107831/ENSG00000104415	8	AXIN2/SH2B3/CDX1/TBXT/MSX1/HAS2/FGF8/CCN4
GO:0061311	cell surface receptor signaling pathway involved in heart development	0.00141796	0.0011091	ENSG00000148400/ENSG00000163132/ENSG00000154342/ENSG00000019549	4	NOTCH1/MSX1/WNT3A/SNAI2
GO:0001503	ossification	0.00154107	0.00120539	ENSG00000162878/ENSG00000168646/ENSG00000138795/ENSG00000148400/ENSG00000105996/ENSG00000140937/ENSG00000102678/ENSG00000154342/ENSG00000125931/ENSG00000019549/ENSG00000104415	11	PKDCC/AXIN2/LEF1/NOTCH1/HOXA2/CDH11/FGF9/WNT3A/CITED1/SNAI2/CCN4
GO:0001655	urogenital system development	0.00159591	0.00124828	ENSG00000125266/ENSG00000273707/ENSG00000103449/ENSG00000260027/ENSG00000116106/ENSG00000170961/ENSG00000134853/ENSG00000107831/ENSG00000125931/ENSG00000103241	10	EFNB2/CDKN1C/SALL1/HOXB7/EPHA4/HAS2/PDGFRA/FGF8/CITED1/FOXF1
GO:0007178	transmembrane receptor protein serine/threonine kinase signaling pathway	0.00159591	0.00124828	ENSG00000156574/ENSG00000273707/ENSG00000148400/ENSG00000128045/ENSG00000164458/ENSG00000183779/ENSG00000163132/ENSG00000102678/ENSG00000107831/ENSG00000125931	10	NODAL/CDKN1C/NOTCH1/RASL11B/TBXT/ZNF703/MSX1/FGF9/FGF8/CITED1
GO:0042472	inner ear morphogenesis	0.00159591	0.00124828	ENSG00000168505/ENSG00000144749/ENSG00000105991/ENSG00000102678/ENSG00000107831/ENSG00000154342	6	GBX2/LRIG1/HOXA1/FGF9/FGF8/WNT3A
GO:0048505	regulation of timing of cell differentiation	0.00172735	0.00135109	ENSG00000156574/ENSG00000135919/ENSG00000102678	3	NODAL/SERPINE2/FGF9
GO:0061371	determination of heart left/right asymmetry	0.00187578	0.00146719	ENSG00000156574/ENSG00000148400/ENSG00000164458/ENSG00000107831/ENSG00000154342	5	NODAL/NOTCH1/TBXT/FGF8/WNT3A
GO:0030330	DNA damage response, signal transduction by p53 class mediator	0.00196681	0.00153839	ENSG00000116717/ENSG00000144580/ENSG00000143479/ENSG00000158435/ENSG00000163132/ENSG00000019549	6	GADD45A/CNOT9/DYRK3/CNOT11/MSX1/SNAI2
GO:0050768	negative regulation of neurogenesis	0.00198627	0.00155361	ENSG00000125266/ENSG00000173406/ENSG00000166450/ENSG00000148400/ENSG00000116106/ENSG00000105996/ENSG00000154342/ENSG00000090932/ENSG00000149922	9	EFNB2/DAB1/PRTG/NOTCH1/EPHA4/HOXA2/WNT3A/DLL3/TBX6
GO:0003203	endocardial cushion morphogenesis	0.00198627	0.00155361	ENSG00000148400/ENSG00000163132/ENSG00000107831/ENSG00000019549	4	NOTCH1/MSX1/FGF8/SNAI2
GO:0040034	regulation of development, heterochronic	0.00200924	0.00157158	ENSG00000156574/ENSG00000135919/ENSG00000102678	3	NODAL/SERPINE2/FGF9
GO:0048608	reproductive structure development	0.00200924	0.00157158	ENSG00000156574/ENSG00000141448/ENSG00000273707/ENSG00000103449/ENSG00000164104/ENSG00000135919/ENSG00000134853/ENSG00000102678/ENSG00000107831/ENSG00000125931/ENSG00000105855	11	NODAL/GATA6/CDKN1C/SALL1/HMGB2/SERPINE2/PDGFRA/FGF9/FGF8/CITED1/ITGB8
GO:0055024	regulation of cardiac muscle tissue development	0.00200924	0.00157158	ENSG00000141448/ENSG00000125266/ENSG00000148400/ENSG00000102678/ENSG00000107831/ENSG00000154342	6	GATA6/EFNB2/NOTCH1/FGF9/FGF8/WNT3A
GO:0061458	reproductive system development	0.00209712	0.00164032	ENSG00000156574/ENSG00000141448/ENSG00000273707/ENSG00000103449/ENSG00000164104/ENSG00000135919/ENSG00000134853/ENSG00000102678/ENSG00000107831/ENSG00000125931/ENSG00000105855	11	NODAL/GATA6/CDKN1C/SALL1/HMGB2/SERPINE2/PDGFRA/FGF9/FGF8/CITED1/ITGB8
GO:0016202	regulation of striated muscle tissue development	0.00225458	0.00176347	ENSG00000141448/ENSG00000125266/ENSG00000138795/ENSG00000148400/ENSG00000102678/ENSG00000107831/ENSG00000154342	7	GATA6/EFNB2/LEF1/NOTCH1/FGF9/FGF8/WNT3A
GO:0001822	kidney development	0.00226858	0.00177443	ENSG00000125266/ENSG00000273707/ENSG00000103449/ENSG00000260027/ENSG00000116106/ENSG00000170961/ENSG00000134853/ENSG00000107831/ENSG00000125931	9	EFNB2/CDKN1C/SALL1/HOXB7/EPHA4/HAS2/PDGFRA/FGF8/CITED1
GO:0055025	positive regulation of cardiac muscle tissue development	0.00226858	0.00177443	ENSG00000141448/ENSG00000125266/ENSG00000148400/ENSG00000102678/ENSG00000154342	5	GATA6/EFNB2/NOTCH1/FGF9/WNT3A
GO:0007368	determination of left/right symmetry	0.00226858	0.00177443	ENSG00000156574/ENSG00000148400/ENSG00000164458/ENSG00000107831/ENSG00000154342/ENSG00000103241	6	NODAL/NOTCH1/TBXT/FGF8/WNT3A/FOXF1
GO:1901861	regulation of muscle tissue development	0.00234764	0.00183626	ENSG00000141448/ENSG00000125266/ENSG00000138795/ENSG00000148400/ENSG00000102678/ENSG00000107831/ENSG00000154342	7	GATA6/EFNB2/LEF1/NOTCH1/FGF9/FGF8/WNT3A
GO:0090092	regulation of transmembrane receptor protein serine/threonine kinase signaling pathway	0.00234764	0.00183626	ENSG00000156574/ENSG00000273707/ENSG00000148400/ENSG00000128045/ENSG00000183779/ENSG00000163132/ENSG00000102678/ENSG00000125931	8	NODAL/CDKN1C/NOTCH1/RASL11B/ZNF703/MSX1/FGF9/CITED1
GO:0048634	regulation of muscle organ development	0.00240101	0.00187801	ENSG00000141448/ENSG00000125266/ENSG00000138795/ENSG00000148400/ENSG00000102678/ENSG00000107831/ENSG00000154342	7	GATA6/EFNB2/LEF1/NOTCH1/FGF9/FGF8/WNT3A
GO:0030198	extracellular matrix organization	0.00248805	0.00194609	ENSG00000107742/ENSG00000102996/ENSG00000130635/ENSG00000087303/ENSG00000148400/ENSG00000170961/ENSG00000134853/ENSG00000154342/ENSG00000103241/ENSG00000105855	10	SPOCK2/MMP15/COL5A1/NID2/NOTCH1/HAS2/PDGFRA/WNT3A/FOXF1/ITGB8
GO:0051961	negative regulation of nervous system development	0.00263399	0.00206024	ENSG00000125266/ENSG00000173406/ENSG00000166450/ENSG00000148400/ENSG00000116106/ENSG00000105996/ENSG00000154342/ENSG00000090932/ENSG00000149922	9	EFNB2/DAB1/PRTG/NOTCH1/EPHA4/HOXA2/WNT3A/DLL3/TBX6
GO:0034111	negative regulation of homotypic cell-cell adhesion	0.00263399	0.00206024	ENSG00000111252/ENSG00000135919/ENSG00000183779	3	SH2B3/SERPINE2/ZNF703
GO:0042074	cell migration involved in gastrulation	0.00263399	0.00206024	ENSG00000156574/ENSG00000164458/ENSG00000107831	3	NODAL/TBXT/FGF8
GO:0060841	venous blood vessel development	0.00263399	0.00206024	ENSG00000125266/ENSG00000148400/ENSG00000103241	3	EFNB2/NOTCH1/FOXF1
GO:0048844	artery morphogenesis	0.00274717	0.00214877	ENSG00000125266/ENSG00000105991/ENSG00000148400/ENSG00000107831/ENSG00000103241	5	EFNB2/HOXA1/NOTCH1/FGF8/FOXF1
GO:0050678	regulation of epithelial cell proliferation	0.00298335	0.0023335	ENSG00000156574/ENSG00000125266/ENSG00000273707/ENSG00000164104/ENSG00000183779/ENSG00000170961/ENSG00000102678/ENSG00000134817/ENSG00000154342/ENSG00000019549	10	NODAL/EFNB2/CDKN1C/HMGB2/ZNF703/HAS2/FGF9/APLNR/WNT3A/SNAI2
GO:0001707	mesoderm formation	0.00302891	0.00236914	ENSG00000156574/ENSG00000164458/ENSG00000154342/ENSG00000103241/ENSG00000149922	5	NODAL/TBXT/WNT3A/FOXF1/TBX6
GO:1901213	regulation of transcription from RNA polymerase II promoter involved in heart development	0.00307242	0.00240317	ENSG00000148400/ENSG00000164458/ENSG00000163132	3	NOTCH1/TBXT/MSX1
GO:0048710	regulation of astrocyte differentiation	0.00307541	0.00240551	ENSG00000173406/ENSG00000148400/ENSG00000135919/ENSG00000116106	4	DAB1/NOTCH1/SERPINE2/EPHA4
GO:0030324	lung development	0.00307541	0.00240551	ENSG00000156574/ENSG00000141448/ENSG00000162878/ENSG00000134853/ENSG00000102678/ENSG00000107831/ENSG00000103241	7	NODAL/GATA6/PKDCC/PDGFRA/FGF9/FGF8/FOXF1
GO:0009855	determination of bilateral symmetry	0.00308269	0.00241121	ENSG00000156574/ENSG00000148400/ENSG00000164458/ENSG00000107831/ENSG00000154342/ENSG00000103241	6	NODAL/NOTCH1/TBXT/FGF8/WNT3A/FOXF1
GO:0009799	specification of symmetry	0.00314317	0.00245851	ENSG00000156574/ENSG00000148400/ENSG00000164458/ENSG00000107831/ENSG00000154342/ENSG00000103241	6	NODAL/NOTCH1/TBXT/FGF8/WNT3A/FOXF1
GO:0042476	odontogenesis	0.00314317	0.00245851	ENSG00000184916/ENSG00000168646/ENSG00000138795/ENSG00000163132/ENSG00000134853/ENSG00000107831	6	JAG2/AXIN2/LEF1/MSX1/PDGFRA/FGF8
GO:0048332	mesoderm morphogenesis	0.00314317	0.00245851	ENSG00000156574/ENSG00000164458/ENSG00000154342/ENSG00000103241/ENSG00000149922	5	NODAL/TBXT/WNT3A/FOXF1/TBX6
GO:0021953	central nervous system neuron differentiation	0.003284	0.00256866	ENSG00000168505/ENSG00000103449/ENSG00000106038/ENSG00000116106/ENSG00000140937/ENSG00000107831/ENSG00000154342	7	GBX2/SALL1/EVX1/EPHA4/CDH11/FGF8/WNT3A
GO:0030323	respiratory tube development	0.003284	0.00256866	ENSG00000156574/ENSG00000141448/ENSG00000162878/ENSG00000134853/ENSG00000102678/ENSG00000107831/ENSG00000103241	7	NODAL/GATA6/PKDCC/PDGFRA/FGF9/FGF8/FOXF1
GO:1990573	potassium ion import across plasma membrane	0.00335145	0.00262142	ENSG00000018625/ENSG00000162989/ENSG00000120457	3	ATP1A2/KCNJ3/KCNJ5
GO:0007492	endoderm development	0.00337707	0.00264146	ENSG00000156574/ENSG00000141448/ENSG00000102996/ENSG00000130635/ENSG00000107831	5	NODAL/GATA6/MMP15/COL5A1/FGF8
GO:0010107	potassium ion import	0.00378673	0.00296189	ENSG00000018625/ENSG00000162989/ENSG00000120457	3	ATP1A2/KCNJ3/KCNJ5
GO:0036342	post-anal tail morphogenesis	0.00378673	0.00296189	ENSG00000164458/ENSG00000154342/ENSG00000179111	3	TBXT/WNT3A/HES7
GO:0090330	regulation of platelet aggregation	0.00378673	0.00296189	ENSG00000111252/ENSG00000158856/ENSG00000135919	3	SH2B3/DMTN/SERPINE2
GO:0042770	signal transduction in response to DNA damage	0.00378673	0.00296189	ENSG00000116717/ENSG00000144580/ENSG00000143479/ENSG00000158435/ENSG00000163132/ENSG00000019549	6	GADD45A/CNOT9/DYRK3/CNOT11/MSX1/SNAI2
GO:0048701	embryonic cranial skeleton morphogenesis	0.00378673	0.00296189	ENSG00000156574/ENSG00000105991/ENSG00000105996/ENSG00000134853	4	NODAL/HOXA1/HOXA2/PDGFRA
GO:0042475	odontogenesis of dentin-containing tooth	0.00396286	0.00309965	ENSG00000184916/ENSG00000138795/ENSG00000163132/ENSG00000134853/ENSG00000107831	5	JAG2/LEF1/MSX1/PDGFRA/FGF8
GO:0048863	stem cell differentiation	0.0042529	0.00332652	ENSG00000141448/ENSG00000168505/ENSG00000148400/ENSG00000164458/ENSG00000163132/ENSG00000134853/ENSG00000154342/ENSG00000019549	8	GATA6/GBX2/NOTCH1/TBXT/MSX1/PDGFRA/WNT3A/SNAI2
GO:0007379	segment specification	0.0042529	0.00332652	ENSG00000171843/ENSG00000105996/ENSG00000151379	3	MLLT3/HOXA2/MSGN1
GO:0010544	negative regulation of platelet activation	0.0042529	0.00332652	ENSG00000111252/ENSG00000135919/ENSG00000134853	3	SH2B3/SERPINE2/PDGFRA
GO:0048839	inner ear development	0.0042529	0.00332652	ENSG00000184916/ENSG00000168505/ENSG00000144749/ENSG00000105991/ENSG00000102678/ENSG00000107831/ENSG00000154342	7	JAG2/GBX2/LRIG1/HOXA1/FGF9/FGF8/WNT3A
GO:0060349	bone morphogenesis	0.00442478	0.00346096	ENSG00000168646/ENSG00000113722/ENSG00000164458/ENSG00000163132/ENSG00000170961	5	AXIN2/CDX1/TBXT/MSX1/HAS2
GO:0032330	regulation of chondrocyte differentiation	0.00452717	0.00354104	ENSG00000162878/ENSG00000168646/ENSG00000019549/ENSG00000104415	4	PKDCC/AXIN2/SNAI2/CCN4
GO:0050679	positive regulation of epithelial cell proliferation	0.00452814	0.0035418	ENSG00000156574/ENSG00000164104/ENSG00000183779/ENSG00000170961/ENSG00000102678/ENSG00000134817/ENSG00000154342	7	NODAL/HMGB2/ZNF703/HAS2/FGF9/APLNR/WNT3A
GO:0045667	regulation of osteoblast differentiation	0.00489935	0.00383215	ENSG00000168646/ENSG00000148400/ENSG00000105996/ENSG00000125931/ENSG00000019549/ENSG00000104415	6	AXIN2/NOTCH1/HOXA2/CITED1/SNAI2/CCN4
GO:0010718	positive regulation of epithelial to mesenchymal transition	0.00506401	0.00396095	ENSG00000168646/ENSG00000138795/ENSG00000148400/ENSG00000183779	4	AXIN2/LEF1/NOTCH1/ZNF703
GO:0021545	cranial nerve development	0.00506401	0.00396095	ENSG00000103449/ENSG00000105991/ENSG00000173917/ENSG00000128652	4	SALL1/HOXA1/HOXB2/HOXD3
GO:0061138	morphogenesis of a branching epithelium	0.00506401	0.00396095	ENSG00000168505/ENSG00000103449/ENSG00000260027/ENSG00000107831/ENSG00000125931/ENSG00000103241/ENSG00000019549	7	GBX2/SALL1/HOXB7/FGF8/CITED1/FOXF1/SNAI2
GO:0048708	astrocyte differentiation	0.00508251	0.00397542	ENSG00000173406/ENSG00000148400/ENSG00000123560/ENSG00000135919/ENSG00000116106	5	DAB1/NOTCH1/PLP1/SERPINE2/EPHA4
GO:0060541	respiratory system development	0.00512132	0.00400577	ENSG00000156574/ENSG00000141448/ENSG00000162878/ENSG00000134853/ENSG00000102678/ENSG00000107831/ENSG00000103241	7	NODAL/GATA6/PKDCC/PDGFRA/FGF9/FGF8/FOXF1
GO:0031589	cell-substrate adhesion	0.0052295	0.00409039	ENSG00000107742/ENSG00000152818/ENSG00000158856/ENSG00000087303/ENSG00000129474/ENSG00000148400/ENSG00000170961/ENSG00000103241/ENSG00000128652	9	SPOCK2/UTRN/DMTN/NID2/AJUBA/NOTCH1/HAS2/FOXF1/HOXD3
GO:0035987	endodermal cell differentiation	0.00525636	0.00411139	ENSG00000156574/ENSG00000141448/ENSG00000102996/ENSG00000130635	4	NODAL/GATA6/MMP15/COL5A1
GO:0072073	kidney epithelium development	0.00528135	0.00413094	ENSG00000125266/ENSG00000103449/ENSG00000260027/ENSG00000116106/ENSG00000107831/ENSG00000125931	6	EFNB2/SALL1/HOXB7/EPHA4/FGF8/CITED1
GO:0043062	extracellular structure organization	0.00534474	0.00418053	ENSG00000107742/ENSG00000102996/ENSG00000130635/ENSG00000087303/ENSG00000148400/ENSG00000170961/ENSG00000134853/ENSG00000154342/ENSG00000103241/ENSG00000105855	10	SPOCK2/MMP15/COL5A1/NID2/NOTCH1/HAS2/PDGFRA/WNT3A/FOXF1/ITGB8
GO:2000027	regulation of animal organ morphogenesis	0.00583656	0.00456522	ENSG00000148400/ENSG00000171843/ENSG00000260027/ENSG00000163132/ENSG00000107831/ENSG00000154342/ENSG00000125931/ENSG00000019549	8	NOTCH1/MLLT3/HOXB7/MSX1/FGF8/WNT3A/CITED1/SNAI2
GO:0007411	axon guidance	0.00593939	0.00464565	ENSG00000173406/ENSG00000168505/ENSG00000116106/ENSG00000105996/ENSG00000107831/ENSG00000154342/ENSG00000182168	7	DAB1/GBX2/EPHA4/HOXA2/FGF8/WNT3A/UNC5C
GO:0097485	neuron projection guidance	0.00618434	0.00483724	ENSG00000173406/ENSG00000168505/ENSG00000116106/ENSG00000105996/ENSG00000107831/ENSG00000154342/ENSG00000182168	7	DAB1/GBX2/EPHA4/HOXA2/FGF8/WNT3A/UNC5C
GO:0050673	epithelial cell proliferation	0.00618434	0.00483724	ENSG00000156574/ENSG00000125266/ENSG00000273707/ENSG00000164104/ENSG00000183779/ENSG00000170961/ENSG00000102678/ENSG00000134817/ENSG00000154342/ENSG00000019549	10	NODAL/EFNB2/CDKN1C/HMGB2/ZNF703/HAS2/FGF9/APLNR/WNT3A/SNAI2
GO:0060828	regulation of canonical Wnt signaling pathway	0.00618902	0.0048409	ENSG00000168646/ENSG00000188803/ENSG00000111186/ENSG00000171843/ENSG00000183779/ENSG00000102678/ENSG00000154342/ENSG00000019549	8	AXIN2/SHISA6/WNT5B/MLLT3/ZNF703/FGF9/WNT3A/SNAI2
GO:0001701	in utero embryonic development	0.00618902	0.0048409	ENSG00000156574/ENSG00000141448/ENSG00000273707/ENSG00000184916/ENSG00000163132/ENSG00000134853/ENSG00000154342/ENSG00000125931/ENSG00000103241	9	NODAL/GATA6/CDKN1C/JAG2/MSX1/PDGFRA/WNT3A/CITED1/FOXF1
GO:0008045	motor neuron axon guidance	0.00630439	0.00493114	ENSG00000116106/ENSG00000105996/ENSG00000107831	3	EPHA4/HOXA2/FGF8
GO:0030278	regulation of ossification	0.00630439	0.00493114	ENSG00000162878/ENSG00000168646/ENSG00000148400/ENSG00000105996/ENSG00000125931/ENSG00000019549/ENSG00000104415	7	PKDCC/AXIN2/NOTCH1/HOXA2/CITED1/SNAI2/CCN4
GO:0060840	artery development	0.00630439	0.00493114	ENSG00000125266/ENSG00000105991/ENSG00000148400/ENSG00000107831/ENSG00000103241	5	EFNB2/HOXA1/NOTCH1/FGF8/FOXF1
GO:0090287	regulation of cellular response to growth factor stimulus	0.0064122	0.00501547	ENSG00000273707/ENSG00000148400/ENSG00000128045/ENSG00000183779/ENSG00000163132/ENSG00000138119/ENSG00000102678/ENSG00000125931	8	CDKN1C/NOTCH1/RASL11B/ZNF703/MSX1/MYOF/FGF9/CITED1
GO:0045844	positive regulation of striated muscle tissue development	0.0064122	0.00501547	ENSG00000141448/ENSG00000125266/ENSG00000148400/ENSG00000102678/ENSG00000154342	5	GATA6/EFNB2/NOTCH1/FGF9/WNT3A
GO:0048636	positive regulation of muscle organ development	0.0064122	0.00501547	ENSG00000141448/ENSG00000125266/ENSG00000148400/ENSG00000102678/ENSG00000154342	5	GATA6/EFNB2/NOTCH1/FGF9/WNT3A
GO:0001763	morphogenesis of a branching structure	0.0064122	0.00501547	ENSG00000168505/ENSG00000103449/ENSG00000260027/ENSG00000107831/ENSG00000125931/ENSG00000103241/ENSG00000019549	7	GBX2/SALL1/HOXB7/FGF8/CITED1/FOXF1/SNAI2
GO:0035107	appendage morphogenesis	0.00653712	0.00511317	ENSG00000162878/ENSG00000103449/ENSG00000164651/ENSG00000163132/ENSG00000102678/ENSG00000107831	6	PKDCC/SALL1/SP8/MSX1/FGF9/FGF8
GO:0035108	limb morphogenesis	0.00653712	0.00511317	ENSG00000162878/ENSG00000103449/ENSG00000164651/ENSG00000163132/ENSG00000102678/ENSG00000107831	6	PKDCC/SALL1/SP8/MSX1/FGF9/FGF8
GO:1901863	positive regulation of muscle tissue development	0.00653712	0.00511317	ENSG00000141448/ENSG00000125266/ENSG00000148400/ENSG00000102678/ENSG00000154342	5	GATA6/EFNB2/NOTCH1/FGF9/WNT3A
GO:0030178	negative regulation of Wnt signaling pathway	0.00674325	0.0052744	ENSG00000168646/ENSG00000188803/ENSG00000111186/ENSG00000171843/ENSG00000102678/ENSG00000125931/ENSG00000019549	7	AXIN2/SHISA6/WNT5B/MLLT3/FGF9/CITED1/SNAI2
GO:0090068	positive regulation of cell cycle process	0.00686791	0.00537191	ENSG00000141448/ENSG00000116717/ENSG00000144580/ENSG00000143479/ENSG00000178295/ENSG00000158435/ENSG00000163132/ENSG00000107831	8	GATA6/GADD45A/CNOT9/DYRK3/GEN1/CNOT11/MSX1/FGF8
GO:0001706	endoderm formation	0.00723047	0.0056555	ENSG00000156574/ENSG00000141448/ENSG00000102996/ENSG00000130635	4	NODAL/GATA6/MMP15/COL5A1
GO:0030325	adrenal gland development	0.00738436	0.00577587	ENSG00000273707/ENSG00000103449/ENSG00000134853	3	CDKN1C/SALL1/PDGFRA
GO:0018108	peptidyl-tyrosine phosphorylation	0.00738436	0.00577587	ENSG00000162878/ENSG00000181467/ENSG00000143479/ENSG00000111252/ENSG00000158856/ENSG00000116106/ENSG00000134853/ENSG00000107831/ENSG00000154342	9	PKDCC/RAP2B/DYRK3/SH2B3/DMTN/EPHA4/PDGFRA/FGF8/WNT3A
GO:0018212	peptidyl-tyrosine modification	0.00775903	0.00606892	ENSG00000162878/ENSG00000181467/ENSG00000143479/ENSG00000111252/ENSG00000158856/ENSG00000116106/ENSG00000134853/ENSG00000107831/ENSG00000154342	9	PKDCC/RAP2B/DYRK3/SH2B3/DMTN/EPHA4/PDGFRA/FGF8/WNT3A
GO:0002011	morphogenesis of an epithelial sheet	0.00786665	0.0061531	ENSG00000130635/ENSG00000129474/ENSG00000148400/ENSG00000173917	4	COL5A1/AJUBA/NOTCH1/HOXB2
GO:0045668	negative regulation of osteoblast differentiation	0.00786665	0.0061531	ENSG00000168646/ENSG00000148400/ENSG00000105996/ENSG00000125931	4	AXIN2/NOTCH1/HOXA2/CITED1
GO:0048645	animal organ formation	0.00786665	0.0061531	ENSG00000141448/ENSG00000168646/ENSG00000107831/ENSG00000154342	4	GATA6/AXIN2/FGF8/WNT3A
GO:0042692	muscle cell differentiation	0.00797641	0.00623896	ENSG00000141448/ENSG00000125266/ENSG00000148400/ENSG00000163132/ENSG00000138119/ENSG00000134853/ENSG00000102678/ENSG00000154342/ENSG00000103241	9	GATA6/EFNB2/NOTCH1/MSX1/MYOF/PDGFRA/FGF9/WNT3A/FOXF1
GO:0007162	negative regulation of cell adhesion	0.00801015	0.00626534	ENSG00000160685/ENSG00000173406/ENSG00000111252/ENSG00000158856/ENSG00000148400/ENSG00000135919/ENSG00000183779/ENSG00000019549	8	ZBTB7B/DAB1/SH2B3/DMTN/NOTCH1/SERPINE2/ZNF703/SNAI2
GO:0001947	heart looping	0.00812003	0.00635129	ENSG00000156574/ENSG00000148400/ENSG00000107831/ENSG00000154342	4	NODAL/NOTCH1/FGF8/WNT3A
GO:0009880	embryonic pattern specification	0.00812003	0.00635129	ENSG00000156574/ENSG00000164458/ENSG00000125931/ENSG00000149922	4	NODAL/TBXT/CITED1/TBX6
GO:0035051	cardiocyte differentiation	0.00812003	0.00635129	ENSG00000141448/ENSG00000125266/ENSG00000148400/ENSG00000164458/ENSG00000134853/ENSG00000154342	6	GATA6/EFNB2/NOTCH1/TBXT/PDGFRA/WNT3A
GO:0048738	cardiac muscle tissue development	0.00812003	0.00635129	ENSG00000141448/ENSG00000125266/ENSG00000148400/ENSG00000134853/ENSG00000102678/ENSG00000107831/ENSG00000154342	7	GATA6/EFNB2/NOTCH1/PDGFRA/FGF9/FGF8/WNT3A
GO:0010811	positive regulation of cell-substrate adhesion	0.0085289	0.00667109	ENSG00000107742/ENSG00000152818/ENSG00000158856/ENSG00000170961/ENSG00000103241	5	SPOCK2/UTRN/DMTN/HAS2/FOXF1
GO:0060561	apoptotic process involved in morphogenesis	0.0085289	0.00667109	ENSG00000184916/ENSG00000138795/ENSG00000148400	3	JAG2/LEF1/NOTCH1
GO:0022407	regulation of cell-cell adhesion	0.00922123	0.00721262	ENSG00000156574/ENSG00000160685/ENSG00000125266/ENSG00000111252/ENSG00000158856/ENSG00000135919/ENSG00000183779/ENSG00000170961/ENSG00000154342/ENSG00000019549	10	NODAL/ZBTB7B/EFNB2/SH2B3/DMTN/SERPINE2/ZNF703/HAS2/WNT3A/SNAI2
GO:0001658	branching involved in ureteric bud morphogenesis	0.00935617	0.00731817	ENSG00000103449/ENSG00000260027/ENSG00000107831/ENSG00000125931	4	SALL1/HOXB7/FGF8/CITED1
GO:0030168	platelet activation	0.00935617	0.00731817	ENSG00000181467/ENSG00000111252/ENSG00000158856/ENSG00000135919/ENSG00000134853/ENSG00000154342	6	RAP2B/SH2B3/DMTN/SERPINE2/PDGFRA/WNT3A
GO:0048754	branching morphogenesis of an epithelial tube	0.00935617	0.00731817	ENSG00000168505/ENSG00000103449/ENSG00000260027/ENSG00000107831/ENSG00000125931/ENSG00000103241	6	GBX2/SALL1/HOXB7/FGF8/CITED1/FOXF1
GO:0045787	positive regulation of cell cycle	0.0101004	0.00790031	ENSG00000141448/ENSG00000116717/ENSG00000144580/ENSG00000143479/ENSG00000178295/ENSG00000158435/ENSG00000134138/ENSG00000163132/ENSG00000107831	9	GATA6/GADD45A/CNOT9/DYRK3/GEN1/CNOT11/MEIS2/MSX1/FGF8
GO:0021602	cranial nerve morphogenesis	0.0101004	0.00790031	ENSG00000105991/ENSG00000173917/ENSG00000128652	3	HOXA1/HOXB2/HOXD3
GO:0021872	forebrain generation of neurons	0.0101004	0.00790031	ENSG00000168505/ENSG00000103449/ENSG00000107831/ENSG00000154342	4	GBX2/SALL1/FGF8/WNT3A
GO:1904888	cranial skeletal system development	0.0101004	0.00790031	ENSG00000156574/ENSG00000105991/ENSG00000105996/ENSG00000134853	4	NODAL/HOXA1/HOXA2/PDGFRA
GO:0003143	embryonic heart tube morphogenesis	0.010616	0.00830354	ENSG00000156574/ENSG00000148400/ENSG00000107831/ENSG00000154342	4	NODAL/NOTCH1/FGF8/WNT3A
GO:0003016	respiratory system process	0.0108843	0.00851344	ENSG00000167081/ENSG00000018625/ENSG00000184916	3	PBX3/ATP1A2/JAG2
GO:0062009	secondary palate development	0.0108843	0.00851344	ENSG00000184916/ENSG00000138795/ENSG00000154342	3	JAG2/LEF1/WNT3A
GO:0061035	regulation of cartilage development	0.0109417	0.00855833	ENSG00000162878/ENSG00000168646/ENSG00000019549/ENSG00000104415	4	PKDCC/AXIN2/SNAI2/CCN4
GO:0071300	cellular response to retinoic acid	0.0109417	0.00855833	ENSG00000111186/ENSG00000164458/ENSG00000105996/ENSG00000154342	4	WNT5B/TBXT/HOXA2/WNT3A
GO:1903034	regulation of response to wounding	0.0111001	0.00868227	ENSG00000111252/ENSG00000158856/ENSG00000135919/ENSG00000116106/ENSG00000134853/ENSG00000104415	6	SH2B3/DMTN/SERPINE2/EPHA4/PDGFRA/CCN4
GO:1904837	beta-catenin-TCF complex assembly	0.0117065	0.00915657	ENSG00000168646/ENSG00000140332/ENSG00000138795	3	AXIN2/TLE3/LEF1
GO:0046622	positive regulation of organ growth	0.011966	0.00935955	ENSG00000141448/ENSG00000148400/ENSG00000102678/ENSG00000107831	4	GATA6/NOTCH1/FGF9/FGF8
GO:0048736	appendage development	0.0128149	0.0100235	ENSG00000162878/ENSG00000103449/ENSG00000164651/ENSG00000163132/ENSG00000102678/ENSG00000107831	6	PKDCC/SALL1/SP8/MSX1/FGF9/FGF8
GO:0060173	limb development	0.0128149	0.0100235	ENSG00000162878/ENSG00000103449/ENSG00000164651/ENSG00000163132/ENSG00000102678/ENSG00000107831	6	PKDCC/SALL1/SP8/MSX1/FGF9/FGF8
GO:0060675	ureteric bud morphogenesis	0.0130473	0.0102053	ENSG00000103449/ENSG00000260027/ENSG00000107831/ENSG00000125931	4	SALL1/HOXB7/FGF8/CITED1
GO:0030177	positive regulation of Wnt signaling pathway	0.0133734	0.0104603	ENSG00000103449/ENSG00000168646/ENSG00000171843/ENSG00000102678/ENSG00000154342/ENSG00000104415	6	SALL1/AXIN2/MLLT3/FGF9/WNT3A/CCN4
GO:0072171	mesonephric tubule morphogenesis	0.013512	0.0105687	ENSG00000103449/ENSG00000260027/ENSG00000107831/ENSG00000125931	4	SALL1/HOXB7/FGF8/CITED1
GO:0010092	specification of animal organ identity	0.013512	0.0105687	ENSG00000168646/ENSG00000107831/ENSG00000154342	3	AXIN2/FGF8/WNT3A
GO:0002028	regulation of sodium ion transport	0.0139915	0.0109438	ENSG00000018625/ENSG00000152818/ENSG00000179094/ENSG00000135919	4	ATP1A2/UTRN/PER1/SERPINE2
GO:0030193	regulation of blood coagulation	0.0139915	0.0109438	ENSG00000111252/ENSG00000158856/ENSG00000135919/ENSG00000134853	4	SH2B3/DMTN/SERPINE2/PDGFRA
GO:0007517	muscle organ development	0.0139915	0.0109438	ENSG00000141448/ENSG00000125266/ENSG00000152818/ENSG00000138795/ENSG00000148400/ENSG00000163132/ENSG00000102678/ENSG00000107831/ENSG00000154342	9	GATA6/EFNB2/UTRN/LEF1/NOTCH1/MSX1/FGF9/FGF8/WNT3A
GO:0031128	developmental induction	0.0143374	0.0112143	ENSG00000103449/ENSG00000107831/ENSG00000154342	3	SALL1/FGF8/WNT3A
GO:0043516	regulation of DNA damage response, signal transduction by p53 class mediator	0.0143374	0.0112143	ENSG00000143479/ENSG00000163132/ENSG00000019549	3	DYRK3/MSX1/SNAI2
GO:1900046	regulation of hemostasis	0.014402	0.0112649	ENSG00000111252/ENSG00000158856/ENSG00000135919/ENSG00000134853	4	SH2B3/DMTN/SERPINE2/PDGFRA
GO:0008344	adult locomotory behavior	0.0148711	0.0116318	ENSG00000167081/ENSG00000018625/ENSG00000173406/ENSG00000116106	4	PBX3/ATP1A2/DAB1/EPHA4
GO:0021536	diencephalon development	0.0148711	0.0116318	ENSG00000168505/ENSG00000103449/ENSG00000163132/ENSG00000107831	4	GBX2/SALL1/MSX1/FGF8
GO:0051145	smooth muscle cell differentiation	0.0148711	0.0116318	ENSG00000141448/ENSG00000148400/ENSG00000102678/ENSG00000103241	4	GATA6/NOTCH1/FGF9/FOXF1
GO:0010837	regulation of keratinocyte proliferation	0.014983	0.0117193	ENSG00000125266/ENSG00000170961/ENSG00000019549	3	EFNB2/HAS2/SNAI2
GO:1902742	apoptotic process involved in development	0.014983	0.0117193	ENSG00000184916/ENSG00000138795/ENSG00000148400	3	JAG2/LEF1/NOTCH1
GO:0030326	embryonic limb morphogenesis	0.014983	0.0117193	ENSG00000103449/ENSG00000164651/ENSG00000163132/ENSG00000102678/ENSG00000107831	5	SALL1/SP8/MSX1/FGF9/FGF8
GO:0035113	embryonic appendage morphogenesis	0.014983	0.0117193	ENSG00000103449/ENSG00000164651/ENSG00000163132/ENSG00000102678/ENSG00000107831	5	SALL1/SP8/MSX1/FGF9/FGF8
GO:0035050	embryonic heart tube development	0.015183	0.0118758	ENSG00000156574/ENSG00000148400/ENSG00000107831/ENSG00000154342	4	NODAL/NOTCH1/FGF8/WNT3A
GO:0007548	sex differentiation	0.0154084	0.0120521	ENSG00000141448/ENSG00000144580/ENSG00000103449/ENSG00000164104/ENSG00000134853/ENSG00000102678/ENSG00000107831	7	GATA6/CNOT9/SALL1/HMGB2/PDGFRA/FGF9/FGF8
GO:0033144	negative regulation of intracellular steroid hormone receptor signaling pathway	0.0159642	0.0124868	ENSG00000156574/ENSG00000144580/ENSG00000179094	3	NODAL/CNOT9/PER1
GO:0050818	regulation of coagulation	0.0164179	0.0128417	ENSG00000111252/ENSG00000158856/ENSG00000135919/ENSG00000134853	4	SH2B3/DMTN/SERPINE2/PDGFRA
GO:0007596	blood coagulation	0.0169367	0.0132475	ENSG00000141448/ENSG00000181467/ENSG00000111252/ENSG00000158856/ENSG00000069974/ENSG00000135919/ENSG00000134853/ENSG00000154342	8	GATA6/RAP2B/SH2B3/DMTN/RAB27A/SERPINE2/PDGFRA/WNT3A
GO:0021954	central nervous system neuron development	0.0169367	0.0132475	ENSG00000168505/ENSG00000116106/ENSG00000140937/ENSG00000107831	4	GBX2/EPHA4/CDH11/FGF8
GO:0000578	embryonic axis specification	0.0169367	0.0132475	ENSG00000164458/ENSG00000125931/ENSG00000149922	3	TBXT/CITED1/TBX6
GO:0051147	regulation of muscle cell differentiation	0.0173633	0.0135812	ENSG00000125266/ENSG00000148400/ENSG00000163132/ENSG00000102678/ENSG00000154342/ENSG00000103241	6	EFNB2/NOTCH1/MSX1/FGF9/WNT3A/FOXF1
GO:0045995	regulation of embryonic development	0.0173805	0.0135946	ENSG00000156574/ENSG00000130635/ENSG00000113722/ENSG00000154342/ENSG00000179111	5	NODAL/COL5A1/CDX1/WNT3A/HES7
GO:0009798	axis specification	0.0177865	0.0139121	ENSG00000156574/ENSG00000164458/ENSG00000125931/ENSG00000149922	4	NODAL/TBXT/CITED1/TBX6
GO:0072078	nephron tubule morphogenesis	0.0177865	0.0139121	ENSG00000103449/ENSG00000260027/ENSG00000107831/ENSG00000125931	4	SALL1/HOXB7/FGF8/CITED1
GO:0110110	positive regulation of animal organ morphogenesis	0.0177865	0.0139121	ENSG00000148400/ENSG00000260027/ENSG00000107831/ENSG00000154342	4	NOTCH1/HOXB7/FGF8/WNT3A
GO:0007599	hemostasis	0.0177865	0.0139121	ENSG00000141448/ENSG00000181467/ENSG00000111252/ENSG00000158856/ENSG00000069974/ENSG00000135919/ENSG00000134853/ENSG00000154342	8	GATA6/RAP2B/SH2B3/DMTN/RAB27A/SERPINE2/PDGFRA/WNT3A
GO:0050817	coagulation	0.0177865	0.0139121	ENSG00000141448/ENSG00000181467/ENSG00000111252/ENSG00000158856/ENSG00000069974/ENSG00000135919/ENSG00000134853/ENSG00000154342	8	GATA6/RAP2B/SH2B3/DMTN/RAB27A/SERPINE2/PDGFRA/WNT3A
GO:0010977	negative regulation of neuron projection development	0.0177865	0.0139121	ENSG00000125266/ENSG00000173406/ENSG00000116106/ENSG00000154342/ENSG00000149922	5	EFNB2/DAB1/EPHA4/WNT3A/TBX6
GO:0045665	negative regulation of neuron differentiation	0.0177865	0.0139121	ENSG00000125266/ENSG00000173406/ENSG00000116106/ENSG00000105996/ENSG00000154342/ENSG00000149922	6	EFNB2/DAB1/EPHA4/HOXA2/WNT3A/TBX6
GO:0001840	neural plate development	0.0177865	0.0139121	ENSG00000164458/ENSG00000107831	2	TBXT/FGF8
GO:0051890	regulation of cardioblast differentiation	0.0177865	0.0139121	ENSG00000141448/ENSG00000154342	2	GATA6/WNT3A
GO:0060536	cartilage morphogenesis	0.0177865	0.0139121	ENSG00000163132/ENSG00000019549	2	MSX1/SNAI2
GO:0090009	primitive streak formation	0.0177865	0.0139121	ENSG00000156574/ENSG00000164458	2	NODAL/TBXT
GO:2000288	positive regulation of myoblast proliferation	0.0177865	0.0139121	ENSG00000141448/ENSG00000134138	2	GATA6/MEIS2
GO:0010810	regulation of cell-substrate adhesion	0.0181376	0.0141868	ENSG00000107742/ENSG00000152818/ENSG00000158856/ENSG00000148400/ENSG00000170961/ENSG00000103241	6	SPOCK2/UTRN/DMTN/NOTCH1/HAS2/FOXF1
GO:0021532	neural tube patterning	0.0181376	0.0141868	ENSG00000168505/ENSG00000107831/ENSG00000154342	3	GBX2/FGF8/WNT3A
GO:0060045	positive regulation of cardiac muscle cell proliferation	0.0181376	0.0141868	ENSG00000141448/ENSG00000148400/ENSG00000102678	3	GATA6/NOTCH1/FGF9
GO:0045685	regulation of glial cell differentiation	0.0183123	0.0143234	ENSG00000173406/ENSG00000148400/ENSG00000135919/ENSG00000116106	4	DAB1/NOTCH1/SERPINE2/EPHA4
GO:0071158	positive regulation of cell cycle arrest	0.0183123	0.0143234	ENSG00000141448/ENSG00000116717/ENSG00000144580/ENSG00000158435	4	GATA6/GADD45A/CNOT9/CNOT11
GO:0072088	nephron epithelium morphogenesis	0.0183123	0.0143234	ENSG00000103449/ENSG00000260027/ENSG00000107831/ENSG00000125931	4	SALL1/HOXB7/FGF8/CITED1
GO:0051146	striated muscle cell differentiation	0.0183489	0.0143521	ENSG00000141448/ENSG00000125266/ENSG00000148400/ENSG00000163132/ENSG00000138119/ENSG00000134853/ENSG00000154342	7	GATA6/EFNB2/NOTCH1/MSX1/MYOF/PDGFRA/WNT3A
GO:0001667	ameboidal-type cell migration	0.0187548	0.0146696	ENSG00000156574/ENSG00000125266/ENSG00000168505/ENSG00000131016/ENSG00000158856/ENSG00000148400/ENSG00000164458/ENSG00000170961/ENSG00000107831	9	NODAL/EFNB2/GBX2/AKAP12/DMTN/NOTCH1/TBXT/HAS2/FGF8
GO:0030534	adult behavior	0.0188019	0.0147064	ENSG00000167081/ENSG00000018625/ENSG00000173406/ENSG00000165300/ENSG00000116106	5	PBX3/ATP1A2/DAB1/SLITRK5/EPHA4
GO:0034332	adherens junction organization	0.0188019	0.0147064	ENSG00000158856/ENSG00000129474/ENSG00000139880/ENSG00000183779/ENSG00000140937	5	DMTN/AJUBA/CDH24/ZNF703/CDH11
GO:0048286	lung alveolus development	0.0188019	0.0147064	ENSG00000141448/ENSG00000162878/ENSG00000103241	3	GATA6/PKDCC/FOXF1
GO:0001708	cell fate specification	0.0192227	0.0150355	ENSG00000156574/ENSG00000106038/ENSG00000154342/ENSG00000149922	4	NODAL/EVX1/WNT3A/TBX6
GO:0061333	renal tubule morphogenesis	0.0192227	0.0150355	ENSG00000103449/ENSG00000260027/ENSG00000107831/ENSG00000125931	4	SALL1/HOXB7/FGF8/CITED1
GO:0072028	nephron morphogenesis	0.0192227	0.0150355	ENSG00000103449/ENSG00000260027/ENSG00000107831/ENSG00000125931	4	SALL1/HOXB7/FGF8/CITED1
GO:0045598	regulation of fat cell differentiation	0.0198189	0.0155019	ENSG00000160685/ENSG00000111186/ENSG00000154342/ENSG00000019549/ENSG00000104415	5	ZBTB7B/WNT5B/WNT3A/SNAI2/CCN4
GO:0021903	rostrocaudal neural tube patterning	0.0198189	0.0155019	ENSG00000168505/ENSG00000107831	2	GBX2/FGF8
GO:0060947	cardiac vascular smooth muscle cell differentiation	0.0198189	0.0155019	ENSG00000141448/ENSG00000148400	2	GATA6/NOTCH1
GO:0061314	Notch signaling involved in heart development	0.0198189	0.0155019	ENSG00000148400/ENSG00000019549	2	NOTCH1/SNAI2
GO:1901201	regulation of extracellular matrix assembly	0.0198189	0.0155019	ENSG00000148400/ENSG00000170961	2	NOTCH1/HAS2
GO:0008406	gonad development	0.0206483	0.0161506	ENSG00000141448/ENSG00000103449/ENSG00000164104/ENSG00000134853/ENSG00000102678/ENSG00000107831	6	GATA6/SALL1/HMGB2/PDGFRA/FGF9/FGF8
GO:0048333	mesodermal cell differentiation	0.0206483	0.0161506	ENSG00000156574/ENSG00000154342/ENSG00000103241	3	NODAL/WNT3A/FOXF1
GO:0045785	positive regulation of cell adhesion	0.0206483	0.0161506	ENSG00000156574/ENSG00000107742/ENSG00000160685/ENSG00000125266/ENSG00000152818/ENSG00000158856/ENSG00000170961/ENSG00000154342/ENSG00000103241	9	NODAL/SPOCK2/ZBTB7B/EFNB2/UTRN/DMTN/HAS2/WNT3A/FOXF1
GO:0030279	negative regulation of ossification	0.0216113	0.0169039	ENSG00000168646/ENSG00000148400/ENSG00000105996/ENSG00000125931	4	AXIN2/NOTCH1/HOXA2/CITED1
GO:0061041	regulation of wound healing	0.0216113	0.0169039	ENSG00000111252/ENSG00000158856/ENSG00000135919/ENSG00000134853/ENSG00000104415	5	SH2B3/DMTN/SERPINE2/PDGFRA/CCN4
GO:0072006	nephron development	0.0216113	0.0169039	ENSG00000103449/ENSG00000260027/ENSG00000134853/ENSG00000107831/ENSG00000125931	5	SALL1/HOXB7/PDGFRA/FGF8/CITED1
GO:0035886	vascular smooth muscle cell differentiation	0.0216819	0.016959	ENSG00000141448/ENSG00000148400/ENSG00000102678	3	GATA6/NOTCH1/FGF9
GO:0030099	myeloid cell differentiation	0.0216902	0.0169656	ENSG00000273707/ENSG00000143479/ENSG00000111252/ENSG00000164104/ENSG00000158856/ENSG00000138795/ENSG00000260027/ENSG00000134138/ENSG00000104415	9	CDKN1C/DYRK3/SH2B3/HMGB2/DMTN/LEF1/HOXB7/MEIS2/CCN4
GO:0035148	tube formation	0.0217654	0.0170244	ENSG00000156574/ENSG00000105991/ENSG00000148400/ENSG00000164458/ENSG00000107831	5	NODAL/HOXA1/NOTCH1/TBXT/FGF8
GO:0071772	response to BMP	0.0217654	0.0170244	ENSG00000141448/ENSG00000148400/ENSG00000164458/ENSG00000163132/ENSG00000107831	5	GATA6/NOTCH1/TBXT/MSX1/FGF8
GO:0071773	cellular response to BMP stimulus	0.0217654	0.0170244	ENSG00000141448/ENSG00000148400/ENSG00000164458/ENSG00000163132/ENSG00000107831	5	GATA6/NOTCH1/TBXT/MSX1/FGF8
GO:0090331	negative regulation of platelet aggregation	0.0223008	0.0174431	ENSG00000111252/ENSG00000135919	2	SH2B3/SERPINE2
GO:0099624	atrial cardiac muscle cell membrane repolarization	0.0223008	0.0174431	ENSG00000162989/ENSG00000120457	2	KCNJ3/KCNJ5
GO:0045137	development of primary sexual characteristics	0.0223008	0.0174431	ENSG00000141448/ENSG00000103449/ENSG00000164104/ENSG00000134853/ENSG00000102678/ENSG00000107831	6	GATA6/SALL1/HMGB2/PDGFRA/FGF9/FGF8
GO:0098659	inorganic cation import across plasma membrane	0.0223008	0.0174431	ENSG00000018625/ENSG00000162989/ENSG00000120457	3	ATP1A2/KCNJ3/KCNJ5
GO:0099587	inorganic ion import across plasma membrane	0.0223008	0.0174431	ENSG00000018625/ENSG00000162989/ENSG00000120457	3	ATP1A2/KCNJ3/KCNJ5
GO:0030879	mammary gland development	0.0224586	0.0175666	ENSG00000160685/ENSG00000183779/ENSG00000163132/ENSG00000154342/ENSG00000103241	5	ZBTB7B/ZNF703/MSX1/WNT3A/FOXF1
GO:0010463	mesenchymal cell proliferation	0.0232203	0.0181624	ENSG00000163132/ENSG00000102678/ENSG00000103241	3	MSX1/FGF9/FOXF1
GO:0010470	regulation of gastrulation	0.0232203	0.0181624	ENSG00000156574/ENSG00000130635/ENSG00000154342	3	NODAL/COL5A1/WNT3A
GO:0021983	pituitary gland development	0.0232203	0.0181624	ENSG00000103449/ENSG00000163132/ENSG00000107831	3	SALL1/MSX1/FGF8
GO:0043616	keratinocyte proliferation	0.0232203	0.0181624	ENSG00000125266/ENSG00000170961/ENSG00000019549	3	EFNB2/HAS2/SNAI2
GO:0032102	negative regulation of response to external stimulus	0.0232203	0.0181624	ENSG00000111252/ENSG00000148400/ENSG00000135919/ENSG00000116106/ENSG00000134853/ENSG00000154342/ENSG00000103241/ENSG00000019549	8	SH2B3/NOTCH1/SERPINE2/EPHA4/PDGFRA/WNT3A/FOXF1/SNAI2
GO:1903035	negative regulation of response to wounding	0.0235185	0.0183956	ENSG00000111252/ENSG00000135919/ENSG00000116106/ENSG00000134853	4	SH2B3/SERPINE2/EPHA4/PDGFRA
GO:0010717	regulation of epithelial to mesenchymal transition	0.024333	0.0190327	ENSG00000168646/ENSG00000138795/ENSG00000148400/ENSG00000183779	4	AXIN2/LEF1/NOTCH1/ZNF703
GO:0021915	neural tube development	0.0246686	0.0192951	ENSG00000156574/ENSG00000168505/ENSG00000164458/ENSG00000107831/ENSG00000154342	5	NODAL/GBX2/TBXT/FGF8/WNT3A
GO:0007494	midgut development	0.0246686	0.0192951	ENSG00000173406/ENSG00000103241	2	DAB1/FOXF1
GO:0010763	positive regulation of fibroblast migration	0.0246686	0.0192951	ENSG00000131016/ENSG00000158856	2	AKAP12/DMTN
GO:0010766	negative regulation of sodium ion transport	0.0246686	0.0192951	ENSG00000018625/ENSG00000135919	2	ATP1A2/SERPINE2
GO:0060379	cardiac muscle cell myoblast differentiation	0.0246686	0.0192951	ENSG00000148400/ENSG00000164458	2	NOTCH1/TBXT
GO:0014706	striated muscle tissue development	0.0246686	0.0192951	ENSG00000141448/ENSG00000125266/ENSG00000138795/ENSG00000148400/ENSG00000134853/ENSG00000102678/ENSG00000107831/ENSG00000154342	8	GATA6/EFNB2/LEF1/NOTCH1/PDGFRA/FGF9/FGF8/WNT3A
GO:0030901	midbrain development	0.025504	0.0199486	ENSG00000123560/ENSG00000163132/ENSG00000102678/ENSG00000154342	4	PLP1/MSX1/FGF9/WNT3A
GO:0046661	male sex differentiation	0.0262915	0.0205646	ENSG00000141448/ENSG00000164104/ENSG00000134853/ENSG00000102678/ENSG00000107831	5	GATA6/HMGB2/PDGFRA/FGF9/FGF8
GO:0009948	anterior/posterior axis specification	0.0265327	0.0207532	ENSG00000156574/ENSG00000164458/ENSG00000149922	3	NODAL/TBXT/TBX6
GO:0060795	cell fate commitment involved in formation of primary germ layer	0.0265327	0.0207532	ENSG00000156574/ENSG00000141448/ENSG00000154342	3	NODAL/GATA6/WNT3A
GO:0072210	metanephric nephron development	0.0265327	0.0207532	ENSG00000103449/ENSG00000134853/ENSG00000125931	3	SALL1/PDGFRA/CITED1
GO:0030902	hindbrain development	0.0270944	0.0211926	ENSG00000173406/ENSG00000168505/ENSG00000173917/ENSG00000135919/ENSG00000105996	5	DAB1/GBX2/HOXB2/SERPINE2/HOXA2
GO:0001656	metanephros development	0.0270944	0.0211926	ENSG00000103449/ENSG00000134853/ENSG00000107831/ENSG00000125931	4	SALL1/PDGFRA/FGF8/CITED1
GO:0002087	regulation of respiratory gaseous exchange by neurological system process	0.0270944	0.0211926	ENSG00000167081/ENSG00000018625	2	PBX3/ATP1A2
GO:0003128	heart field specification	0.0270944	0.0211926	ENSG00000168646/ENSG00000154342	2	AXIN2/WNT3A
GO:0003214	cardiac left ventricle morphogenesis	0.0270944	0.0211926	ENSG00000148400/ENSG00000103241	2	NOTCH1/FOXF1
GO:0007501	mesodermal cell fate specification	0.0270944	0.0211926	ENSG00000156574/ENSG00000154342	2	NODAL/WNT3A
GO:0010839	negative regulation of keratinocyte proliferation	0.0270944	0.0211926	ENSG00000125266/ENSG00000019549	2	EFNB2/SNAI2
GO:0033151	V(D)J recombination	0.0270944	0.0211926	ENSG00000164104/ENSG00000138795	2	HMGB2/LEF1
GO:0048368	lateral mesoderm development	0.0270944	0.0211926	ENSG00000156574/ENSG00000103241	2	NODAL/FOXF1
GO:0060395	SMAD protein signal transduction	0.0270971	0.0211947	ENSG00000156574/ENSG00000164458/ENSG00000125931	3	NODAL/TBXT/CITED1
GO:0007409	axonogenesis	0.0273682	0.0214067	ENSG00000173406/ENSG00000168505/ENSG00000116106/ENSG00000105996/ENSG00000140937/ENSG00000107831/ENSG00000154342/ENSG00000182168	8	DAB1/GBX2/EPHA4/HOXA2/CDH11/FGF8/WNT3A/UNC5C
GO:0072080	nephron tubule development	0.0277317	0.0216911	ENSG00000103449/ENSG00000260027/ENSG00000107831/ENSG00000125931	4	SALL1/HOXB7/FGF8/CITED1
GO:0007050	cell cycle arrest	0.0280583	0.0219466	ENSG00000141448/ENSG00000273707/ENSG00000116717/ENSG00000144580/ENSG00000158435/ENSG00000148400	6	GATA6/CDKN1C/GADD45A/CNOT9/CNOT11/NOTCH1
GO:0030195	negative regulation of blood coagulation	0.0280784	0.0219622	ENSG00000111252/ENSG00000135919/ENSG00000134853	3	SH2B3/SERPINE2/PDGFRA
GO:0048546	digestive tract morphogenesis	0.0280784	0.0219622	ENSG00000156574/ENSG00000134853/ENSG00000103241	3	NODAL/PDGFRA/FOXF1
GO:0060976	coronary vasculature development	0.0280784	0.0219622	ENSG00000141448/ENSG00000148400/ENSG00000134817	3	GATA6/NOTCH1/APLNR
GO:0060993	kidney morphogenesis	0.0282032	0.0220599	ENSG00000103449/ENSG00000260027/ENSG00000107831/ENSG00000125931	4	SALL1/HOXB7/FGF8/CITED1
GO:0060537	muscle tissue development	0.0286984	0.0224472	ENSG00000141448/ENSG00000125266/ENSG00000138795/ENSG00000148400/ENSG00000134853/ENSG00000102678/ENSG00000107831/ENSG00000154342	8	GATA6/EFNB2/LEF1/NOTCH1/PDGFRA/FGF9/FGF8/WNT3A
GO:0061326	renal tubule development	0.0289905	0.0226757	ENSG00000103449/ENSG00000260027/ENSG00000107831/ENSG00000125931	4	SALL1/HOXB7/FGF8/CITED1
GO:1900047	negative regulation of hemostasis	0.0292811	0.022903	ENSG00000111252/ENSG00000135919/ENSG00000134853	3	SH2B3/SERPINE2/PDGFRA
GO:0031345	negative regulation of cell projection organization	0.0292856	0.0229065	ENSG00000125266/ENSG00000173406/ENSG00000116106/ENSG00000154342/ENSG00000149922	5	EFNB2/DAB1/EPHA4/WNT3A/TBX6
GO:0045444	fat cell differentiation	0.0292856	0.0229065	ENSG00000160685/ENSG00000111186/ENSG00000154342/ENSG00000179148/ENSG00000019549/ENSG00000104415	6	ZBTB7B/WNT5B/WNT3A/ALOXE3/SNAI2/CCN4
GO:0001657	ureteric bud development	0.0292856	0.0229065	ENSG00000103449/ENSG00000260027/ENSG00000107831/ENSG00000125931	4	SALL1/HOXB7/FGF8/CITED1
GO:0021510	spinal cord development	0.0292856	0.0229065	ENSG00000167081/ENSG00000173406/ENSG00000106038/ENSG00000154342	4	PBX3/DAB1/EVX1/WNT3A
GO:0032927	positive regulation of activin receptor signaling pathway	0.0292856	0.0229065	ENSG00000156574/ENSG00000102678	2	NODAL/FGF9
GO:0072178	nephric duct morphogenesis	0.0292856	0.0229065	ENSG00000125266/ENSG00000116106	2	EFNB2/EPHA4
GO:0072163	mesonephric epithelium development	0.0298717	0.0233649	ENSG00000103449/ENSG00000260027/ENSG00000107831/ENSG00000125931	4	SALL1/HOXB7/FGF8/CITED1
GO:0072164	mesonephric tubule development	0.0298717	0.0233649	ENSG00000103449/ENSG00000260027/ENSG00000107831/ENSG00000125931	4	SALL1/HOXB7/FGF8/CITED1
GO:0086009	membrane repolarization	0.0298717	0.0233649	ENSG00000018625/ENSG00000162989/ENSG00000120457	3	ATP1A2/KCNJ3/KCNJ5
GO:1905209	positive regulation of cardiocyte differentiation	0.0298717	0.0233649	ENSG00000141448/ENSG00000125266/ENSG00000154342	3	GATA6/EFNB2/WNT3A
GO:0003205	cardiac chamber development	0.0299575	0.0234321	ENSG00000141448/ENSG00000103449/ENSG00000148400/ENSG00000107831/ENSG00000103241	5	GATA6/SALL1/NOTCH1/FGF8/FOXF1
GO:0014911	positive regulation of smooth muscle cell migration	0.0313133	0.0244925	ENSG00000170961/ENSG00000102678/ENSG00000104415	3	HAS2/FGF9/CCN4
GO:0003337	mesenchymal to epithelial transition involved in metanephros morphogenesis	0.0324311	0.0253668	ENSG00000103449/ENSG00000125931	2	SALL1/CITED1
GO:0043518	negative regulation of DNA damage response, signal transduction by p53 class mediator	0.0324311	0.0253668	ENSG00000143479/ENSG00000019549	2	DYRK3/SNAI2
GO:0050819	negative regulation of coagulation	0.0325674	0.0254734	ENSG00000111252/ENSG00000135919/ENSG00000134853	3	SH2B3/SERPINE2/PDGFRA
GO:0060563	neuroepithelial cell differentiation	0.0325674	0.0254734	ENSG00000156574/ENSG00000184916/ENSG00000107831	3	NODAL/JAG2/FGF8
GO:0001823	mesonephros development	0.0332818	0.0260322	ENSG00000103449/ENSG00000260027/ENSG00000107831/ENSG00000125931	4	SALL1/HOXB7/FGF8/CITED1
GO:0007632	visual behavior	0.0340696	0.0266484	ENSG00000018625/ENSG00000105991/ENSG00000134138	3	ATP1A2/HOXA1/MEIS2
GO:0002065	columnar/cuboidal epithelial cell differentiation	0.0350594	0.0274226	ENSG00000156574/ENSG00000141448/ENSG00000184916/ENSG00000107831	4	NODAL/GATA6/JAG2/FGF8
GO:0071156	regulation of cell cycle arrest	0.0350594	0.0274226	ENSG00000141448/ENSG00000116717/ENSG00000144580/ENSG00000158435	4	GATA6/GADD45A/CNOT9/CNOT11
GO:0021879	forebrain neuron differentiation	0.0350594	0.0274226	ENSG00000168505/ENSG00000103449/ENSG00000107831	3	GBX2/SALL1/FGF8
GO:0055023	positive regulation of cardiac muscle tissue growth	0.0350594	0.0274226	ENSG00000141448/ENSG00000148400/ENSG00000102678	3	GATA6/NOTCH1/FGF9
GO:0044065	regulation of respiratory system process	0.0350594	0.0274226	ENSG00000167081/ENSG00000018625	2	PBX3/ATP1A2
GO:0048339	paraxial mesoderm development	0.0350594	0.0274226	ENSG00000154342/ENSG00000090932	2	WNT3A/DLL3
GO:0060644	mammary gland epithelial cell differentiation	0.0350594	0.0274226	ENSG00000183779/ENSG00000103241	2	ZNF703/FOXF1
GO:0060850	regulation of transcription involved in cell fate commitment	0.0350594	0.0274226	ENSG00000160685/ENSG00000106038	2	ZBTB7B/EVX1
GO:2000811	negative regulation of anoikis	0.0350594	0.0274226	ENSG00000148400/ENSG00000019549	2	NOTCH1/SNAI2
GO:0032526	response to retinoic acid	0.0374676	0.0293063	ENSG00000111186/ENSG00000164458/ENSG00000105996/ENSG00000154342	4	WNT5B/TBXT/HOXA2/WNT3A
GO:0051783	regulation of nuclear division	0.0374676	0.0293063	ENSG00000273707/ENSG00000118007/ENSG00000178295/ENSG00000163132/ENSG00000107831	5	CDKN1C/STAG1/GEN1/MSX1/FGF8
GO:0060425	lung morphogenesis	0.0379056	0.0296488	ENSG00000156574/ENSG00000107831/ENSG00000103241	3	NODAL/FGF8/FOXF1
GO:0086065	cell communication involved in cardiac conduction	0.0379056	0.0296488	ENSG00000018625/ENSG00000162989/ENSG00000120457	3	ATP1A2/KCNJ3/KCNJ5
GO:0003279	cardiac septum development	0.0382496	0.0299179	ENSG00000141448/ENSG00000103449/ENSG00000148400/ENSG00000107831	4	GATA6/SALL1/NOTCH1/FGF8
GO:0035313	wound healing, spreading of epidermal cells	0.0382903	0.0299498	ENSG00000130635/ENSG00000129474	2	COL5A1/AJUBA
GO:0048532	anatomical structure arrangement	0.0382903	0.0299498	ENSG00000173406/ENSG00000173917	2	DAB1/HOXB2
GO:0071371	cellular response to gonadotropin stimulus	0.0382903	0.0299498	ENSG00000141448/ENSG00000148400	2	GATA6/NOTCH1
GO:0050730	regulation of peptidyl-tyrosine phosphorylation	0.0388894	0.0304183	ENSG00000181467/ENSG00000111252/ENSG00000158856/ENSG00000116106/ENSG00000107831/ENSG00000154342	6	RAP2B/SH2B3/DMTN/EPHA4/FGF8/WNT3A
GO:0006977	DNA damage response, signal transduction by p53 class mediator resulting in cell cycle arrest	0.0388894	0.0304183	ENSG00000116717/ENSG00000144580/ENSG00000158435	3	GADD45A/CNOT9/CNOT11
GO:0060043	regulation of cardiac muscle cell proliferation	0.0388894	0.0304183	ENSG00000141448/ENSG00000148400/ENSG00000102678	3	GATA6/NOTCH1/FGF9
GO:0033673	negative regulation of kinase activity	0.0393282	0.0307616	ENSG00000273707/ENSG00000197852/ENSG00000116717/ENSG00000164086/ENSG00000111252/ENSG00000129474	6	CDKN1C/INKA2/GADD45A/DUSP7/SH2B3/AJUBA
GO:0072009	nephron epithelium development	0.0396104	0.0309823	ENSG00000103449/ENSG00000260027/ENSG00000107831/ENSG00000125931	4	SALL1/HOXB7/FGF8/CITED1
GO:0060421	positive regulation of heart growth	0.0401304	0.031389	ENSG00000141448/ENSG00000148400/ENSG00000102678	3	GATA6/NOTCH1/FGF9
GO:0072431	signal transduction involved in mitotic G1 DNA damage checkpoint	0.0401304	0.031389	ENSG00000116717/ENSG00000144580/ENSG00000158435	3	GADD45A/CNOT9/CNOT11
GO:1902400	intracellular signal transduction involved in G1 DNA damage checkpoint	0.0401304	0.031389	ENSG00000116717/ENSG00000144580/ENSG00000158435	3	GADD45A/CNOT9/CNOT11
GO:0007219	Notch signaling pathway	0.040748	0.0318721	ENSG00000184916/ENSG00000148400/ENSG00000090932/ENSG00000019549/ENSG00000128652	5	JAG2/NOTCH1/DLL3/SNAI2/HOXD3
GO:0006312	mitotic recombination	0.040748	0.0318721	ENSG00000178295/ENSG00000163029	2	GEN1/SMC6
GO:0048557	embryonic digestive tract morphogenesis	0.040748	0.0318721	ENSG00000134853/ENSG00000103241	2	PDGFRA/FOXF1
GO:0060973	cell migration involved in heart development	0.040748	0.0318721	ENSG00000148400/ENSG00000019549	2	NOTCH1/SNAI2
GO:0072176	nephric duct development	0.040748	0.0318721	ENSG00000125266/ENSG00000116106	2	EFNB2/EPHA4
GO:0046620	regulation of organ growth	0.040748	0.0318721	ENSG00000141448/ENSG00000148400/ENSG00000102678/ENSG00000107831	4	GATA6/NOTCH1/FGF9/FGF8
GO:0072089	stem cell proliferation	0.040748	0.0318721	ENSG00000164104/ENSG00000154342/ENSG00000125931/ENSG00000019549	4	HMGB2/WNT3A/CITED1/SNAI2
GO:0090090	negative regulation of canonical Wnt signaling pathway	0.0408542	0.0319552	ENSG00000168646/ENSG00000188803/ENSG00000111186/ENSG00000171843/ENSG00000019549	5	AXIN2/SHISA6/WNT5B/MLLT3/SNAI2
GO:0072413	signal transduction involved in mitotic cell cycle checkpoint	0.0425258	0.0332626	ENSG00000116717/ENSG00000144580/ENSG00000158435	3	GADD45A/CNOT9/CNOT11
GO:1902402	signal transduction involved in mitotic DNA damage checkpoint	0.0425258	0.0332626	ENSG00000116717/ENSG00000144580/ENSG00000158435	3	GADD45A/CNOT9/CNOT11
GO:1902403	signal transduction involved in mitotic DNA integrity checkpoint	0.0425258	0.0332626	ENSG00000116717/ENSG00000144580/ENSG00000158435	3	GADD45A/CNOT9/CNOT11
GO:0017015	regulation of transforming growth factor beta receptor signaling pathway	0.0425367	0.0332712	ENSG00000273707/ENSG00000128045/ENSG00000183779/ENSG00000125931	4	CDKN1C/RASL11B/ZNF703/CITED1
GO:0010769	regulation of cell morphogenesis involved in differentiation	0.0429414	0.0335877	ENSG00000173406/ENSG00000169439/ENSG00000158856/ENSG00000116106/ENSG00000170961/ENSG00000154342	6	DAB1/SDC2/DMTN/EPHA4/HAS2/WNT3A
GO:0007179	transforming growth factor beta receptor signaling pathway	0.0433248	0.0338876	ENSG00000156574/ENSG00000273707/ENSG00000128045/ENSG00000183779/ENSG00000125931	5	NODAL/CDKN1C/RASL11B/ZNF703/CITED1
GO:0061564	axon development	0.0433248	0.0338876	ENSG00000173406/ENSG00000168505/ENSG00000116106/ENSG00000105996/ENSG00000140937/ENSG00000107831/ENSG00000154342/ENSG00000182168	8	DAB1/GBX2/EPHA4/HOXA2/CDH11/FGF8/WNT3A/UNC5C
GO:0007585	respiratory gaseous exchange	0.0433248	0.0338876	ENSG00000167081/ENSG00000018625/ENSG00000184916	3	PBX3/ATP1A2/JAG2
GO:0030878	thyroid gland development	0.0433248	0.0338876	ENSG00000107831/ENSG00000128652	2	FGF8/HOXD3
GO:0042474	middle ear morphogenesis	0.0433248	0.0338876	ENSG00000163132/ENSG00000105996	2	MSX1/HOXA2
GO:0098915	membrane repolarization during ventricular cardiac muscle cell action potential	0.0433248	0.0338876	ENSG00000162989/ENSG00000120457	2	KCNJ3/KCNJ5
GO:2000380	regulation of mesoderm development	0.0433248	0.0338876	ENSG00000156574/ENSG00000154342	2	NODAL/WNT3A
GO:1903844	regulation of cellular response to transforming growth factor beta stimulus	0.0438477	0.0342966	ENSG00000273707/ENSG00000128045/ENSG00000183779/ENSG00000125931	4	CDKN1C/RASL11B/ZNF703/CITED1
GO:0022408	negative regulation of cell-cell adhesion	0.0454778	0.0355716	ENSG00000160685/ENSG00000111252/ENSG00000135919/ENSG00000183779/ENSG00000019549	5	ZBTB7B/SH2B3/SERPINE2/ZNF703/SNAI2
GO:0048639	positive regulation of developmental growth	0.0462957	0.0362113	ENSG00000141448/ENSG00000148400/ENSG00000102678/ENSG00000107831/ENSG00000154342	5	GATA6/NOTCH1/FGF9/FGF8/WNT3A
GO:0014031	mesenchymal cell development	0.0465394	0.036402	ENSG00000168505/ENSG00000148400/ENSG00000019549	3	GBX2/NOTCH1/SNAI2
GO:0045600	positive regulation of fat cell differentiation	0.0465394	0.036402	ENSG00000160685/ENSG00000111186/ENSG00000019549	3	ZBTB7B/WNT5B/SNAI2
GO:0031571	mitotic G1 DNA damage checkpoint	0.0482718	0.037757	ENSG00000116717/ENSG00000144580/ENSG00000158435	3	GADD45A/CNOT9/CNOT11
GO:0044819	mitotic G1/S transition checkpoint	0.0482718	0.037757	ENSG00000116717/ENSG00000144580/ENSG00000158435	3	GADD45A/CNOT9/CNOT11
GO:0033135	regulation of peptidyl-serine phosphorylation	0.0493187	0.0385759	ENSG00000144580/ENSG00000158856/ENSG00000009694/ENSG00000154342	4	CNOT9/DMTN/TENM1/WNT3A
GO:0044783	G1 DNA damage checkpoint	0.0496596	0.0388425	ENSG00000116717/ENSG00000144580/ENSG00000158435	3	GADD45A/CNOT9/CNOT11
GO:0048857	neural nucleus development	0.0496596	0.0388425	ENSG00000173917/ENSG00000123560/ENSG00000102678	3	HOXB2/PLP1/FGF9
GO:0003206	cardiac chamber morphogenesis	0.0496596	0.0388425	ENSG00000141448/ENSG00000148400/ENSG00000107831/ENSG00000103241	4	GATA6/NOTCH1/FGF8/FOXF1
GO:0001759	organ induction	0.0496596	0.0388425	ENSG00000107831/ENSG00000154342	2	FGF8/WNT3A
GO:0032331	negative regulation of chondrocyte differentiation	0.0496596	0.0388425	ENSG00000019549/ENSG00000104415	2	SNAI2/CCN4
GO:0072283	metanephric renal vesicle morphogenesis	0.0496596	0.0388425	ENSG00000103449/ENSG00000125931	2	SALL1/CITED1
GO:0086014	atrial cardiac muscle cell action potential	0.0496596	0.0388425	ENSG00000162989/ENSG00000120457	2	KCNJ3/KCNJ5
GO:0086026	atrial cardiac muscle cell to AV node cell signaling	0.0496596	0.0388425	ENSG00000162989/ENSG00000120457	2	KCNJ3/KCNJ5
GO:0086066	atrial cardiac muscle cell to AV node cell communication	0.0496596	0.0388425	ENSG00000162989/ENSG00000120457	2	KCNJ3/KCNJ5
GO:2000737	negative regulation of stem cell differentiation	0.0496596	0.0388425	ENSG00000148400/ENSG00000154342	2	NOTCH1/WNT3A
GO:0051148	negative regulation of muscle cell differentiation	0.0505397	0.0395309	ENSG00000148400/ENSG00000163132/ENSG00000102678	3	NOTCH1/MSX1/FGF9
GO:0098739	import across plasma membrane	0.0505397	0.0395309	ENSG00000018625/ENSG00000162989/ENSG00000120457	3	ATP1A2/KCNJ3/KCNJ5
GO:0042326	negative regulation of phosphorylation	0.0514129	0.0402139	ENSG00000273707/ENSG00000197852/ENSG00000116717/ENSG00000164086/ENSG00000111252/ENSG00000158856/ENSG00000179094/ENSG00000129474	8	CDKN1C/INKA2/GADD45A/DUSP7/SH2B3/DMTN/PER1/AJUBA
GO:0045927	positive regulation of growth	0.0515127	0.040292	ENSG00000141448/ENSG00000138795/ENSG00000148400/ENSG00000102678/ENSG00000107831/ENSG00000154342	6	GATA6/LEF1/NOTCH1/FGF9/FGF8/WNT3A
GO:0060038	cardiac muscle cell proliferation	0.0520394	0.0407039	ENSG00000141448/ENSG00000148400/ENSG00000102678	3	GATA6/NOTCH1/FGF9
GO:0072091	regulation of stem cell proliferation	0.0520394	0.0407039	ENSG00000164104/ENSG00000125931/ENSG00000019549	3	HMGB2/CITED1/SNAI2
GO:0021516	dorsal spinal cord development	0.0527176	0.0412344	ENSG00000167081/ENSG00000154342	2	PBX3/WNT3A
GO:0030318	melanocyte differentiation	0.0527176	0.0412344	ENSG00000069974/ENSG00000125931	2	RAB27A/CITED1
GO:0048711	positive regulation of astrocyte differentiation	0.0527176	0.0412344	ENSG00000148400/ENSG00000135919	2	NOTCH1/SERPINE2
GO:0060231	mesenchymal to epithelial transition	0.0527176	0.0412344	ENSG00000103449/ENSG00000125931	2	SALL1/CITED1
GO:0051153	regulation of striated muscle cell differentiation	0.0530737	0.041513	ENSG00000125266/ENSG00000148400/ENSG00000163132/ENSG00000154342	4	EFNB2/NOTCH1/MSX1/WNT3A
GO:0072331	signal transduction by p53 class mediator	0.0537011	0.0420037	ENSG00000116717/ENSG00000144580/ENSG00000143479/ENSG00000158435/ENSG00000163132/ENSG00000019549	6	GADD45A/CNOT9/DYRK3/CNOT11/MSX1/SNAI2
GO:0051101	regulation of DNA binding	0.054015	0.0422492	ENSG00000164104/ENSG00000138795/ENSG00000163132/ENSG00000154342	4	HMGB2/LEF1/MSX1/WNT3A
GO:0055007	cardiac muscle cell differentiation	0.054015	0.0422492	ENSG00000141448/ENSG00000125266/ENSG00000134853/ENSG00000154342	4	GATA6/EFNB2/PDGFRA/WNT3A
GO:0086003	cardiac muscle cell contraction	0.0548168	0.0428764	ENSG00000018625/ENSG00000162989/ENSG00000120457	3	ATP1A2/KCNJ3/KCNJ5
GO:0051348	negative regulation of transferase activity	0.0548168	0.0428764	ENSG00000273707/ENSG00000197852/ENSG00000116717/ENSG00000164086/ENSG00000111252/ENSG00000129474	6	CDKN1C/INKA2/GADD45A/DUSP7/SH2B3/AJUBA
GO:0021952	central nervous system projection neuron axonogenesis	0.0554916	0.0434041	ENSG00000116106/ENSG00000140937	2	EPHA4/CDH11
GO:0030539	male genitalia development	0.0554916	0.0434041	ENSG00000134853/ENSG00000107831	2	PDGFRA/FGF8
GO:0042481	regulation of odontogenesis	0.0554916	0.0434041	ENSG00000163132/ENSG00000107831	2	MSX1/FGF8
GO:0043576	regulation of respiratory gaseous exchange	0.0554916	0.0434041	ENSG00000167081/ENSG00000018625	2	PBX3/ATP1A2
GO:2000209	regulation of anoikis	0.0554916	0.0434041	ENSG00000148400/ENSG00000019549	2	NOTCH1/SNAI2
GO:2000291	regulation of myoblast proliferation	0.0554916	0.0434041	ENSG00000141448/ENSG00000134138	2	GATA6/MEIS2
GO:0070374	positive regulation of ERK1 and ERK2 cascade	0.056088	0.0438706	ENSG00000156574/ENSG00000131016/ENSG00000148400/ENSG00000134853/ENSG00000107831	5	NODAL/AKAP12/NOTCH1/PDGFRA/FGF8
GO:0007224	smoothened signaling pathway	0.0564442	0.0441493	ENSG00000135919/ENSG00000102678/ENSG00000140323/ENSG00000103241	4	SERPINE2/FGF9/DISP2/FOXF1
GO:0030218	erythrocyte differentiation	0.0564442	0.0441493	ENSG00000143479/ENSG00000111252/ENSG00000164104/ENSG00000158856	4	DYRK3/SH2B3/HMGB2/DMTN
GO:2000736	regulation of stem cell differentiation	0.0564442	0.0441493	ENSG00000141448/ENSG00000148400/ENSG00000134853/ENSG00000154342	4	GATA6/NOTCH1/PDGFRA/WNT3A
GO:0071229	cellular response to acid chemical	0.0565639	0.0442429	ENSG00000111186/ENSG00000164458/ENSG00000105996/ENSG00000134853/ENSG00000154342	5	WNT5B/TBXT/HOXA2/PDGFRA/WNT3A
GO:0008584	male gonad development	0.0574129	0.044907	ENSG00000141448/ENSG00000164104/ENSG00000134853/ENSG00000102678	4	GATA6/HMGB2/PDGFRA/FGF9
GO:0030509	BMP signaling pathway	0.0574129	0.044907	ENSG00000148400/ENSG00000164458/ENSG00000163132/ENSG00000107831	4	NOTCH1/TBXT/MSX1/FGF8
GO:0046546	development of primary male sexual characteristics	0.0586889	0.045905	ENSG00000141448/ENSG00000164104/ENSG00000134853/ENSG00000102678	4	GATA6/HMGB2/PDGFRA/FGF9
GO:0072077	renal vesicle morphogenesis	0.0587044	0.0459172	ENSG00000103449/ENSG00000125931	2	SALL1/CITED1
GO:0034330	cell junction organization	0.059423	0.0464792	ENSG00000158856/ENSG00000129474/ENSG00000139880/ENSG00000183779/ENSG00000140937/ENSG00000019549	6	DMTN/AJUBA/CDH24/ZNF703/CDH11/SNAI2
GO:0030900	forebrain development	0.0617223	0.0482776	ENSG00000173406/ENSG00000168505/ENSG00000103449/ENSG00000165300/ENSG00000163132/ENSG00000107831/ENSG00000154342	7	DAB1/GBX2/SALL1/SLITRK5/MSX1/FGF8/WNT3A
GO:0001702	gastrulation with mouth forming second	0.0617223	0.0482776	ENSG00000156574/ENSG00000164458	2	NODAL/TBXT
GO:0001710	mesodermal cell fate commitment	0.0617223	0.0482776	ENSG00000156574/ENSG00000154342	2	NODAL/WNT3A
GO:0002053	positive regulation of mesenchymal cell proliferation	0.0617223	0.0482776	ENSG00000102678/ENSG00000103241	2	FGF9/FOXF1
GO:0046426	negative regulation of JAK-STAT cascade	0.0617223	0.0482776	ENSG00000173406/ENSG00000111252	2	DAB1/SH2B3
GO:0060384	innervation	0.0617223	0.0482776	ENSG00000144749/ENSG00000135919	2	LRIG1/SERPINE2
GO:0060914	heart formation	0.0617223	0.0482776	ENSG00000168646/ENSG00000154342	2	AXIN2/WNT3A
GO:0072087	renal vesicle development	0.0617223	0.0482776	ENSG00000103449/ENSG00000125931	2	SALL1/CITED1
GO:0072401	signal transduction involved in DNA integrity checkpoint	0.0617223	0.0482776	ENSG00000116717/ENSG00000144580/ENSG00000158435	3	GADD45A/CNOT9/CNOT11
GO:0072422	signal transduction involved in DNA damage checkpoint	0.0617223	0.0482776	ENSG00000116717/ENSG00000144580/ENSG00000158435	3	GADD45A/CNOT9/CNOT11
GO:0061180	mammary gland epithelium development	0.0634808	0.0496532	ENSG00000183779/ENSG00000163132/ENSG00000103241	3	ZNF703/MSX1/FOXF1
GO:0072395	signal transduction involved in cell cycle checkpoint	0.0634808	0.0496532	ENSG00000116717/ENSG00000144580/ENSG00000158435	3	GADD45A/CNOT9/CNOT11
GO:0086001	cardiac muscle cell action potential	0.0634808	0.0496532	ENSG00000018625/ENSG00000162989/ENSG00000120457	3	ATP1A2/KCNJ3/KCNJ5

## Sheet: Gene body
Gene Name	Peak Value	log2FoldChange	padj
RSPO3	22	-8.84239	5.93963e-53
MSGN1	339	-8.01209	0.000419792
CCDC141	174	-7.03887	2.01207e-05
WISP1	239	-5.92314	3.63348e-06
HOXD3	203	-5.75675	0.00146043
UNC5C	276	-5.25012	3.04598e-11
GMPR	172	-5.24394	4.48727e-17
VWA2	150	-5.2076	0.000301593
KCNJ5	156	-4.98955	0.000945934
SLC8A3	73	-4.96995	4.65965e-13
ABCG1	188	-4.95412	5.94107e-06
HAPLN1	101	-4.94478	1.31055e-07
TBX6	126	-4.9267	1.39852e-34
SPTLC3	153	-4.77687	0.000548673
HAGLR	114	-4.70093	1.09613e-05
CFAP74	40	-4.39469	0.0108606
HES7	311	-4.38883	5.70446e-05
BAALC	247	-4.18995	0.00966897
EDAR	156	-4.0761	0.00718348
ITGB8	75	-3.9938	1.9302e-28
PPP1R14C	150	-3.88432	0.000130399
TGFA	199	-3.63859	2.25531e-09
SYTL4	67	-3.63534	0.00413004
FLJ12825	226	-3.51267	0.00757976
ABCG2	87	-3.50887	0.00118536
KCNQ5	82	-3.42959	0.00280452
AP3B2	74	-3.39555	2.13015e-36
ALDH1A2	26	-3.38407	6.63893e-08
MYZAP	332	-3.35297	2.48493e-08
CST2	46	-3.32905	0.00835216
CEACAM21	16	-3.3078	0.0139373
HOXA-AS3	181	-3.30651	0.00959368
CITED1	65	-3.30351	0.0141708
WNT3A	150	-3.25618	7.57641e-06
APLNR	177	-3.2429	0.00029504
SLIT1	112	-3.23209	2.05471e-08
PLXNA2	182	-3.21712	8.20011e-05
SLC8A1	110	-3.12931	0.0115478
ADAMTS15	97	-3.11546	5.37824e-29
DISP2	37	-3.057	0.0013179
PSTPIP1	36	-3.0373	0.0110921
GRIN2A	66	-3.01919	9.47761e-57
FGF8	160	-2.94278	0.0493107
WNT5A	123	-2.87046	0.00087567
ST8SIA6	214	-2.8434	0.00405725
TCERG1L	143	-2.83995	0.0420946
HES4	39	-2.75009	7.6071e-05
KCNJ3	47	-2.73747	0.0274921
SCARA5	125	-2.64088	0.048454
COL5A2	276	-2.60593	0.0182241
HOXC5	154	-2.56935	0.00147808
GLRA4	109	-2.55866	2.42338e-05
PDYN	21	-2.50799	0.0493107
SPON1	26	-2.50478	9.97505e-17
FGF17	145	-2.50205	0.000979385
CCL26	164	-2.49909	0.00257521
FGF9	41	-2.49586	0.0458614
DDR2	61	-2.47787	0.000925081
LDLRAD4	79	-2.46479	0.0384463
CACNA1E	200	-2.44923	0.0126426
PDGFRA	170	-2.42211	1.07555e-05
MEST	39	-2.41836	0.018318
CDH11	140	-2.41173	1.30753e-07
ARHGAP10	129	-2.40597	0.0110921
DLC1	119	-2.39854	1.91169e-07
RASSF5	131	-2.35664	0.0187145
MYOF	235	-2.34037	2.47776e-11
HOXA2	173	-2.32141	2.37007e-06
ST6GALNAC2	28	-2.23663	0.0131415
CRHR1	42	-2.1616	0.00694265
HAS2	90	-2.13513	4.73267e-06
COL5A3	89	-2.11735	0.0266387
PCDH10	274	-2.09802	4.69478e-06
RUNX3	108	-2.07006	0.0400291
SLCO2A1	143	-2.01615	5.36902e-07
TENM1	170	-2.01313	0.00611567
EOGT	200	-1.96809	0.0135123
ZNF703	27	-1.93583	5.94107e-06
EPHA4	167	-1.92673	6.38945e-08
CACNA1I	155	-1.92417	0.0126272
MEIS2	206	-1.83117	0.0095987
NAT2	175	-1.81326	0.00266465
RBM20	132	-1.80955	0.000310691
PRIMA1	263	-1.80853	1.60338e-06
ADAMTS17	134	-1.8052	0.0171649
HVCN1	73	-1.75314	0.000212542
SLIT3	157	-1.75192	3.30086e-07
FAT2	57	-1.69477	0.00351632
SNAI1	100	-1.69013	6.4468e-05
CDH6	35	-1.67867	7.01115e-07
HHIPL2	98	-1.64777	0.0013179
SERPINE2	74	-1.64099	1.12744e-10
SLITRK5	43	-1.63161	8.66731e-30
HOXB7	116	-1.61842	0.02633
ENC1	107	-1.60493	1.21187e-05
HOXA3	267	-1.57633	0.00275687
ITPR1	83	-1.57482	0.0179594
COLEC12	25	-1.53862	0.0252579
SCD5	139	-1.53353	0.0133724
ELOVL2	30	-1.51669	0.00118536
SMPD3	89	-1.48769	0.00183616
RHBDF1	124	-1.48246	0.000114512
MME	130	-1.46965	4.69478e-06
STARD8	98	-1.46438	0.00921072
SERPINA5	124	-1.45345	0.0155265
MLLT3	182	-1.43536	0.00696506
TNS2	35	-1.42846	0.00015463
PRSS23	66	-1.42113	0.00792861
CABLES1	111	-1.41444	5.80407e-06
PLP1	130	-1.37738	8.39503e-07
SORCS2	72	-1.37576	0.00694265
PKNOX2	201	-1.37147	0.000574966
ST6GAL2	29	-1.36096	0.0338305
LINC00458	36	-1.33738	2.15796e-05
AFAP1L2	123	-1.28357	0.0261153
AHNAK	74	-1.28079	0.0224358
IFFO2	203	-1.25325	9.53627e-05
B3GALTL	67	-1.25087	0.00092004
EVX1	170	-1.23726	0.00257521
RAB27A	22	-1.21783	0.000415125
JPH2	26	-1.21229	0.0165306
HOXB2	89	-1.21035	0.0115685
VSTM2L	85	-1.20102	0.0280067
FOSL2	27	-1.19039	0.0234729
ITM2A	87	-1.17667	0.00140205
URAD	104	-1.17583	0.00072867
SUSD5	49	-1.17107	0.0452191
RASL11B	62	-1.16118	9.51737e-10
GALNT10	183	-1.14278	0.00249248
ADCY7	93	-1.14045	0.00404482
ADORA1	34	-1.1337	0.019794
PLEKHG3	87	-1.12771	0.0125874
COLGALT2	69	-1.1225	8.83477e-05
NOTCH1	165	-1.11499	0.0269947
TGFBI	35	-1.08123	0.00233232
GFOD1	140	-1.06836	3.27972e-05
RND3	22	-1.06484	0.0463218
FBLN7	103	-1.06419	0.018318
LEF1	108	-1.06164	0.020088
NID2	59	-1.05726	0.00906649
ST8SIA3	192	-1.03909	0.00209987
FAM84B	63	-1.0352	0.00126093
PHLDA1	59	-1.0273	0.0091514
ABLIM1	139	-1.0219	7.13313e-08
ADAMTS12	25	-1.00503	0.00078744
CREB3L2	165	-1.00101	0.00194866
ELL2	67	-0.991414	4.04212e-06
BCL2	26	-0.976868	0.0203843
DMTN	145	-0.971767	0.0376807
SMC6	229	-0.966231	5.80407e-06
CYR61	28	-0.961206	0.029758
SP6	76	-0.953917	0.0123233
FLNC	65	-0.949905	0.0133724
SELM	33	-0.943579	0.017406
CDX1	64	-0.943038	0.00576303
WDR91	36	-0.942807	0.0105589
SDC2	45	-0.938214	0.00153829
COL5A1	88	-0.925785	0.02633
KIAA1549L	42	-0.924475	0.0400291
LYPD6	53	-0.908412	0.0313476
DMD	70	-0.874165	0.0458614
NUDT2	152	-0.842425	0.00127892
HOXA1	173	-0.832803	4.99351e-06
TUFT1	26	-0.831464	0.000588628
DTWD2	237	-0.814077	0.0171649
SH2B3	163	-0.810912	0.00584591
DSG2	91	-0.802135	0.0232278
ADGRL2	209	-0.800887	3.33275e-06
WNT5B	270	-0.795515	0.0187145
TRAM2	70	-0.788663	0.0172412
GEN1	229	-0.773262	0.0266387
AMOTL2	132	-0.74999	5.23168e-06
PTPN14	170	-0.749145	0.0470444
DAPK1	275	-0.736765	0.000514879
RARG	50	-0.72185	0.00199469
ARHGEF26	89	-0.719478	0.00404482
VIM	32	-0.716407	0.0194813
DYRK3	45	-0.712148	0.0228313
TLE3	113	-0.711182	0.00270722
DGKQ	162	-0.707668	0.0400291
SORBS1	178	-0.676409	0.00562035
PLEKHG4B	75	-0.674036	0.0122661
SHISA6	56	-0.66559	0.0115685
STX3	47	-0.654156	0.0262489
RAP2B	30	-0.652703	0.0263916
FBXL7	45	-0.648495	0.0437026
FAM53B	144	-0.64693	0.0468839
CAMSAP1	70	-0.643024	0.00959368
TMEM9B	23	-0.630496	0.0172079
MKL2	17	-0.621854	0.0452191
SP8	195	-0.621514	0.0486327
AXIN2	152	-0.612181	0.00104972
PXN	85	-0.601783	0.0136584
PIK3C2B	170	-0.591635	0.0188121
AKAP12	33	-0.58864	0.0179023
PAQR4	28	-0.582049	0.0395104
SALL1	121	-0.581618	0.0117641
BCL7C	84	-0.58022	0.0266449
RQCD1	37	-0.564824	0.0235746
RAPGEF1	222	-0.56189	0.00959619
STAG1	36	-0.547575	0.0329956
CYYR1	29	-0.541282	0.0437026
PRTG	114	-0.526352	0.00146043
CSK	102	-0.510704	0.0240557
AP1S2	29	-0.508993	0.0296489
FURIN	39	0.500918	0.0401647
CKB	38	0.505073	0.0250883
CCND3	46	0.505996	0.0193782
SNRPN	50	0.520937	0.0043912
ARHGEF40	35	0.524995	0.00875724
MMP2	23	0.525357	0.0311674
MYO10	166	0.532745	0.0107625
GLIS2	41	0.534217	0.0243523
EPB41L3	38	0.581101	0.0275449
STEAP2	29	0.59765	0.0297083
MMP15	36	0.615601	0.0374483
CAPRIN2	23	0.618934	0.00292157
SATB1	33	0.62284	0.0440639
WDFY3	27	0.630462	0.0252764
TGIF1	199	0.64262	0.00814244
ISLR2	26	0.650134	0.0108003
GADD45A	26	0.666533	0.0208071
PLS1	68	0.668602	0.0252579
LITAF	71	0.685417	0.0160732
TCF7L2	221	0.717466	0.0158125
DPP10	114	0.745651	0.0354863
FAM212B	141	0.765226	0.00818077
NRIP1	26	0.76743	0.0192461
ISLR	26	0.782163	0.0332673
C2CD2	21	0.800641	0.0270761
LRIG1	109	0.802066	0.0102949
GBX2	85	0.81204	6.38678e-05
DPPA4	28	0.819816	0.00613495
SLAIN1	31	0.84086	0.0211824
PPP1R9A	30	0.851187	0.0123064
TOX3	86	0.852276	0.0107625
KIAA0513	20	0.871746	0.00679763
UTRN	69	0.874069	0.00078744
RAP1GAP2	100	0.880281	0.044588
PHLDB3	22	0.886637	0.0117641
GABRB2	81	0.90987	0.0245565
CDKN1C	90	0.928816	0.000168579
GPRC5B	39	0.930784	0.018318
RABGAP1L	43	0.940801	0.00256601
RBPMS	28	0.942353	0.0327274
PCDH18	55	0.956859	0.00437245
DAB1	220	0.964232	4.70902e-07
SLC37A1	42	0.965321	0.020088
PACSIN1	40	0.965688	0.0236806
NBEA	26	0.987421	0.048454
ACCS	48	1.01528	0.0349023
ZIC2	114	1.017	0.00194866
MFAP3L	19	1.02659	0.018671
ATXN7L1	165	1.034	0.0143473
TPST2	40	1.03507	0.00771911
DMXL1	34	1.03681	1.37334e-05
ATP1A2	74	1.06095	0.00202103
DNAJC6	27	1.07885	0.0155265
FEZF1	23	1.11824	0.0108645
SHISA3	87	1.17513	0.0031271
PREX2	20	1.18031	9.06703e-06
PAK3	41	1.18523	0.0258377
MVP	70	1.18752	0.0211824
DOK5	31	1.19656	0.0213834
USP44	26	1.2035	0.00135586
ZBTB7B	34	1.24836	0.00199661
EGLN3	30	1.28128	0.00507598
ZFHX2	58	1.31756	0.0218272
MAN1C1	40	1.33041	0.00346229
ATP8A1	87	1.33746	0.00679763
PBX3	208	1.35453	0.0145364
PLEKHA7	133	1.38576	0.0144664
CRYM	30	1.39127	0.0110921
SCNN1A	47	1.42046	1.19545e-05
FOXP4	81	1.42678	2.48493e-08
CALN1	24	1.46581	0.044588
KLHL4	69	1.49052	0.0115478
WNT3	42	1.51017	0.0261542
FAM101A	59	1.5278	0.00794342
PKDCC	187	1.60248	0.0108003
LAMP5	33	1.67257	0.000967267
RGS6	145	1.6857	0.0455384
IL6R	35	1.73709	0.00611567
LRAT	30	1.78168	0.00019819
RBM47	39	1.80086	5.10319e-05
FBP1	35	1.84	0.0158145
SPOCK2	38	1.86284	0.00274395
GSC	29	2.21163	0.0185058
EPHA1	48	2.30816	0.0133518
BCL2L2-PABPN1	36	2.40459	0.00506165
DGKI	89	2.57076	0.0402944
SHH	18	2.68901	0.0163166
F13A1	35	2.82177	0.000350783
GATA6	68	2.9256	0.00340635
APCDD1L	147	3.45593	0.00967814
ALDH1A3	20	3.51118	2.15427e-06
NODAL	40	3.6623	2.58445e-07
PITX2	41	4.02404	0.0206055

## Sheet: GO-BP (gene body)
ID	Description	p.adjust	qvalue	geneID	Count	geneSymbol
GO:0003002	regionalization	4.69157e-09	3.64e-09	ENSG00000164093/ENSG00000156574/ENSG00000164690/ENSG00000133937/ENSG00000167081/ENSG00000128610/ENSG00000168505/ENSG00000168646/ENSG00000164651/ENSG00000172819/ENSG00000113722/ENSG00000173917/ENSG00000106038/ENSG00000171843/ENSG00000105997/ENSG00000124216/ENSG00000105996/ENSG00000114251/ENSG00000107831/ENSG00000076356/ENSG00000154342/ENSG00000128918/ENSG00000179111/ENSG00000149922/ENSG00000128652…	26	PITX2/NODAL/SHH/GSC/PBX3/FEZF1/GBX2/AXIN2/SP8/RARG/CDX1/HOXB2/EVX1/MLLT3/HOXA3/SNAI1/HOXA2/WNT5A/FGF8/PLXNA2/WNT3A/ALDH1A2/HES7/TBX6/HOXD3/MSGN1
GO:0007389	pattern specification process	1.67401e-08	1.29879e-08	ENSG00000164093/ENSG00000156574/ENSG00000164690/ENSG00000133937/ENSG00000167081/ENSG00000128610/ENSG00000168505/ENSG00000168646/ENSG00000164651/ENSG00000172819/ENSG00000113722/ENSG00000148400/ENSG00000173917/ENSG00000106038/ENSG00000171843/ENSG00000105997/ENSG00000124216/ENSG00000105996/ENSG00000114251/ENSG00000107831/ENSG00000076356/ENSG00000154342/ENSG00000125931/ENSG00000128918/ENSG00000179111…	28	PITX2/NODAL/SHH/GSC/PBX3/FEZF1/GBX2/AXIN2/SP8/RARG/CDX1/NOTCH1/HOXB2/EVX1/MLLT3/HOXA3/SNAI1/HOXA2/WNT5A/FGF8/PLXNA2/WNT3A/CITED1/ALDH1A2/HES7/TBX6/HOXD3/MSGN1
GO:0048568	embryonic organ development	1.51435e-07	1.17492e-07	ENSG00000156574/ENSG00000184254/ENSG00000164690/ENSG00000133937/ENSG00000162878/ENSG00000273707/ENSG00000168505/ENSG00000144749/ENSG00000103449/ENSG00000172819/ENSG00000111252/ENSG00000105991/ENSG00000142871/ENSG00000148400/ENSG00000173917/ENSG00000260027/ENSG00000124216/ENSG00000105996/ENSG00000134853/ENSG00000102678/ENSG00000114251/ENSG00000107831/ENSG00000154342/ENSG00000125931/ENSG00000128918…	27	NODAL/ALDH1A3/SHH/GSC/PKDCC/CDKN1C/GBX2/LRIG1/SALL1/RARG/SH2B3/HOXA1/CCN1/NOTCH1/HOXB2/HOXB7/SNAI1/HOXA2/PDGFRA/FGF9/WNT5A/FGF8/WNT3A/CITED1/ALDH1A2/HOXD3/RSPO3
GO:0009952	anterior/posterior pattern specification	1.51435e-07	1.17492e-07	ENSG00000156574/ENSG00000164690/ENSG00000167081/ENSG00000128610/ENSG00000168505/ENSG00000168646/ENSG00000172819/ENSG00000113722/ENSG00000173917/ENSG00000171843/ENSG00000114251/ENSG00000107831/ENSG00000076356/ENSG00000154342/ENSG00000128918/ENSG00000179111/ENSG00000149922/ENSG00000128652	18	NODAL/SHH/PBX3/FEZF1/GBX2/AXIN2/RARG/CDX1/HOXB2/MLLT3/WNT5A/FGF8/PLXNA2/WNT3A/ALDH1A2/HES7/TBX6/HOXD3
GO:0061448	connective tissue development	1.58816e-06	1.23219e-06	ENSG00000160712/ENSG00000162878/ENSG00000168646/ENSG00000172819/ENSG00000111186/ENSG00000130635/ENSG00000198832/ENSG00000142871/ENSG00000182158/ENSG00000151388/ENSG00000120708/ENSG00000103056/ENSG00000105997/ENSG00000124216/ENSG00000102678/ENSG00000114251/ENSG00000105855/ENSG00000128652/ENSG00000104415	19	IL6R/PKDCC/AXIN2/RARG/WNT5B/COL5A1/SELENOM/CCN1/CREB3L2/ADAMTS12/TGFBI/SMPD3/HOXA3/SNAI1/FGF9/WNT5A/ITGB8/HOXD3/CCN4
GO:0051216	cartilage development	5.45981e-06	4.23605e-06	ENSG00000162878/ENSG00000168646/ENSG00000172819/ENSG00000111186/ENSG00000142871/ENSG00000182158/ENSG00000151388/ENSG00000120708/ENSG00000103056/ENSG00000105997/ENSG00000124216/ENSG00000102678/ENSG00000114251/ENSG00000105855/ENSG00000128652/ENSG00000104415	16	PKDCC/AXIN2/RARG/WNT5B/CCN1/CREB3L2/ADAMTS12/TGFBI/SMPD3/HOXA3/SNAI1/FGF9/WNT5A/ITGB8/HOXD3/CCN4
GO:0048562	embryonic organ morphogenesis	1.23513e-05	9.58287e-06	ENSG00000156574/ENSG00000184254/ENSG00000164690/ENSG00000133937/ENSG00000168505/ENSG00000144749/ENSG00000103449/ENSG00000172819/ENSG00000105991/ENSG00000148400/ENSG00000173917/ENSG00000260027/ENSG00000105996/ENSG00000134853/ENSG00000102678/ENSG00000114251/ENSG00000107831/ENSG00000154342/ENSG00000128652	19	NODAL/ALDH1A3/SHH/GSC/GBX2/LRIG1/SALL1/RARG/HOXA1/NOTCH1/HOXB2/HOXB7/HOXA2/PDGFRA/FGF9/WNT5A/FGF8/WNT3A/HOXD3
GO:0060485	mesenchyme development	1.33609e-05	1.03662e-05	ENSG00000164093/ENSG00000156574/ENSG00000164690/ENSG00000133937/ENSG00000168505/ENSG00000168646/ENSG00000171791/ENSG00000138795/ENSG00000148400/ENSG00000124216/ENSG00000183779/ENSG00000170961/ENSG00000168675/ENSG00000102678/ENSG00000114251/ENSG00000107831/ENSG00000154342/ENSG00000128918	18	PITX2/NODAL/SHH/GSC/GBX2/AXIN2/BCL2/LEF1/NOTCH1/SNAI1/ZNF703/HAS2/LDLRAD4/FGF9/WNT5A/FGF8/WNT3A/ALDH1A2
GO:0001503	ossification	2.77502e-05	2.15303e-05	ENSG00000164690/ENSG00000160712/ENSG00000162878/ENSG00000087245/ENSG00000168646/ENSG00000143367/ENSG00000142871/ENSG00000171791/ENSG00000138795/ENSG00000148400/ENSG00000103056/ENSG00000124216/ENSG00000105996/ENSG00000140937/ENSG00000162733/ENSG00000102678/ENSG00000204262/ENSG00000114251/ENSG00000183023/ENSG00000154342/ENSG00000125931/ENSG00000104415	22	SHH/IL6R/PKDCC/MMP2/AXIN2/TUFT1/CCN1/BCL2/LEF1/NOTCH1/SMPD3/SNAI1/HOXA2/CDH11/DDR2/FGF9/COL5A2/WNT5A/SLC8A1/WNT3A/CITED1/CCN4
GO:0035282	segmentation	2.77502e-05	2.15303e-05	ENSG00000168646/ENSG00000113722/ENSG00000171843/ENSG00000105996/ENSG00000114251/ENSG00000076356/ENSG00000154342/ENSG00000128918/ENSG00000179111/ENSG00000149922/ENSG00000151379	11	AXIN2/CDX1/MLLT3/HOXA2/WNT5A/PLXNA2/WNT3A/ALDH1A2/HES7/TBX6/MSGN1
GO:0048706	embryonic skeletal system development	3.92151e-05	3.04254e-05	ENSG00000156574/ENSG00000164690/ENSG00000133937/ENSG00000105991/ENSG00000173917/ENSG00000260027/ENSG00000105996/ENSG00000134853/ENSG00000102678/ENSG00000172789/ENSG00000114251/ENSG00000128652	12	NODAL/SHH/GSC/HOXA1/HOXB2/HOXB7/HOXA2/PDGFRA/FGF9/HOXC5/WNT5A/HOXD3
GO:0048762	mesenchymal cell differentiation	4.72649e-05	3.66709e-05	ENSG00000164093/ENSG00000164690/ENSG00000133937/ENSG00000168505/ENSG00000168646/ENSG00000171791/ENSG00000138795/ENSG00000148400/ENSG00000124216/ENSG00000183779/ENSG00000170961/ENSG00000168675/ENSG00000114251/ENSG00000107831/ENSG00000128918	15	PITX2/SHH/GSC/GBX2/AXIN2/BCL2/LEF1/NOTCH1/SNAI1/ZNF703/HAS2/LDLRAD4/WNT5A/FGF8/ALDH1A2
GO:0035270	endocrine system development	4.72649e-05	3.66709e-05	ENSG00000164093/ENSG00000141448/ENSG00000164690/ENSG00000160712/ENSG00000273707/ENSG00000103449/ENSG00000105997/ENSG00000134853/ENSG00000114251/ENSG00000107831/ENSG00000128918/ENSG00000128652	12	PITX2/GATA6/SHH/IL6R/CDKN1C/SALL1/HOXA3/PDGFRA/WNT5A/FGF8/ALDH1A2/HOXD3
GO:0030111	regulation of Wnt signaling pathway	5.39735e-05	4.18759e-05	ENSG00000164690/ENSG00000133937/ENSG00000167191/ENSG00000148737/ENSG00000110888/ENSG00000107263/ENSG00000103449/ENSG00000168646/ENSG00000189319/ENSG00000188803/ENSG00000111186/ENSG00000138795/ENSG00000171843/ENSG00000183779/ENSG00000102678/ENSG00000114251/ENSG00000154342/ENSG00000125931/ENSG00000104415/ENSG00000146374	20	SHH/GSC/GPRC5B/TCF7L2/CAPRIN2/RAPGEF1/SALL1/AXIN2/FAM53B/SHISA6/WNT5B/LEF1/MLLT3/ZNF703/FGF9/WNT5A/WNT3A/CITED1/CCN4/RSPO3
GO:0018212	peptidyl-tyrosine modification	8.35016e-05	6.47855e-05	ENSG00000146904/ENSG00000160712/ENSG00000162878/ENSG00000013364/ENSG00000128294/ENSG00000167191/ENSG00000103653/ENSG00000181467/ENSG00000145214/ENSG00000143479/ENSG00000111252/ENSG00000158856/ENSG00000163485/ENSG00000169129/ENSG00000116106/ENSG00000134853/ENSG00000162733/ENSG00000107831/ENSG00000154342/ENSG00000163235	20	EPHA1/IL6R/PKDCC/MVP/TPST2/GPRC5B/CSK/RAP2B/DGKQ/DYRK3/SH2B3/DMTN/ADORA1/AFAP1L2/EPHA4/PDGFRA/DDR2/FGF8/WNT3A/TGFA
GO:0003007	heart morphogenesis	9.43743e-05	7.32212e-05	ENSG00000164093/ENSG00000156574/ENSG00000141448/ENSG00000164690/ENSG00000168646/ENSG00000130635/ENSG00000142871/ENSG00000148400/ENSG00000124216/ENSG00000184347/ENSG00000170961/ENSG00000164741/ENSG00000114251/ENSG00000107831/ENSG00000154342/ENSG00000128918	16	PITX2/NODAL/GATA6/SHH/AXIN2/COL5A1/CCN1/NOTCH1/SNAI1/SLIT3/HAS2/DLC1/WNT5A/FGF8/WNT3A/ALDH1A2
GO:0010763	positive regulation of fibroblast migration	0.000111053	8.61618e-05	ENSG00000077264/ENSG00000131016/ENSG00000158856/ENSG00000162733/ENSG00000183023	5	PAK3/AKAP12/DMTN/DDR2/SLC8A1
GO:0048608	reproductive structure development	0.000136636	0.00010601	ENSG00000156574/ENSG00000141448/ENSG00000164690/ENSG00000273707/ENSG00000180530/ENSG00000103449/ENSG00000172819/ENSG00000142871/ENSG00000171791/ENSG00000188488/ENSG00000196549/ENSG00000135919/ENSG00000124216/ENSG00000184347/ENSG00000134853/ENSG00000102678/ENSG00000114251/ENSG00000107831/ENSG00000125931/ENSG00000105855/ENSG00000146374	21	NODAL/GATA6/SHH/CDKN1C/NRIP1/SALL1/RARG/CCN1/BCL2/SERPINA5/MME/SERPINE2/SNAI1/SLIT3/PDGFRA/FGF9/WNT5A/FGF8/CITED1/ITGB8/RSPO3
GO:0061458	reproductive system development	0.000144521	0.000112128	ENSG00000156574/ENSG00000141448/ENSG00000164690/ENSG00000273707/ENSG00000180530/ENSG00000103449/ENSG00000172819/ENSG00000142871/ENSG00000171791/ENSG00000188488/ENSG00000196549/ENSG00000135919/ENSG00000124216/ENSG00000184347/ENSG00000134853/ENSG00000102678/ENSG00000114251/ENSG00000107831/ENSG00000125931/ENSG00000105855/ENSG00000146374	21	NODAL/GATA6/SHH/CDKN1C/NRIP1/SALL1/RARG/CCN1/BCL2/SERPINA5/MME/SERPINE2/SNAI1/SLIT3/PDGFRA/FGF9/WNT5A/FGF8/CITED1/ITGB8/RSPO3
GO:0002062	chondrocyte differentiation	0.000196183	0.000152211	ENSG00000162878/ENSG00000168646/ENSG00000172819/ENSG00000111186/ENSG00000182158/ENSG00000151388/ENSG00000120708/ENSG00000103056/ENSG00000102678/ENSG00000104415	10	PKDCC/AXIN2/RARG/WNT5B/CREB3L2/ADAMTS12/TGFBI/SMPD3/FGF9/CCN4
GO:0048705	skeletal system morphogenesis	0.000202603	0.000157191	ENSG00000156574/ENSG00000133937/ENSG00000087245/ENSG00000168646/ENSG00000172819/ENSG00000105991/ENSG00000113722/ENSG00000173917/ENSG00000103056/ENSG00000260027/ENSG00000170961/ENSG00000105996/ENSG00000134853/ENSG00000128652	14	NODAL/GSC/MMP2/AXIN2/RARG/HOXA1/CDX1/HOXB2/SMPD3/HOXB7/HAS2/HOXA2/PDGFRA/HOXD3
GO:0042471	ear morphogenesis	0.000202603	0.000157191	ENSG00000184254/ENSG00000133937/ENSG00000168505/ENSG00000144749/ENSG00000103449/ENSG00000105991/ENSG00000105996/ENSG00000102678/ENSG00000114251/ENSG00000107831/ENSG00000154342	11	ALDH1A3/GSC/GBX2/LRIG1/SALL1/HOXA1/HOXA2/FGF9/WNT5A/FGF8/WNT3A
GO:0018108	peptidyl-tyrosine phosphorylation	0.000206004	0.00015983	ENSG00000146904/ENSG00000160712/ENSG00000162878/ENSG00000013364/ENSG00000167191/ENSG00000103653/ENSG00000181467/ENSG00000145214/ENSG00000143479/ENSG00000111252/ENSG00000158856/ENSG00000163485/ENSG00000169129/ENSG00000116106/ENSG00000134853/ENSG00000162733/ENSG00000107831/ENSG00000154342/ENSG00000163235	19	EPHA1/IL6R/PKDCC/MVP/GPRC5B/CSK/RAP2B/DGKQ/DYRK3/SH2B3/DMTN/ADORA1/AFAP1L2/EPHA4/PDGFRA/DDR2/FGF8/WNT3A/TGFA
GO:0090596	sensory organ morphogenesis	0.000229733	0.00017824	ENSG00000164093/ENSG00000184254/ENSG00000133937/ENSG00000168505/ENSG00000144749/ENSG00000103449/ENSG00000172819/ENSG00000105991/ENSG00000130635/ENSG00000171791/ENSG00000105996/ENSG00000102678/ENSG00000204262/ENSG00000114251/ENSG00000107831/ENSG00000154342	16	PITX2/ALDH1A3/GSC/GBX2/LRIG1/SALL1/RARG/HOXA1/COL5A1/BCL2/HOXA2/FGF9/COL5A2/WNT5A/FGF8/WNT3A
GO:0061053	somite development	0.00027518	0.000213501	ENSG00000164690/ENSG00000168646/ENSG00000113722/ENSG00000114251/ENSG00000076356/ENSG00000154342/ENSG00000128918/ENSG00000179111/ENSG00000149922	9	SHH/AXIN2/CDX1/WNT5A/PLXNA2/WNT3A/ALDH1A2/HES7/TBX6
GO:0048732	gland development	0.000291274	0.000225988	ENSG00000164093/ENSG00000156574/ENSG00000184254/ENSG00000141448/ENSG00000164690/ENSG00000160685/ENSG00000273707/ENSG00000103449/ENSG00000172819/ENSG00000171791/ENSG00000188488/ENSG00000105997/ENSG00000135919/ENSG00000183779/ENSG00000134853/ENSG00000114251/ENSG00000107831/ENSG00000154342/ENSG00000128918/ENSG00000135960/ENSG00000128652	21	PITX2/NODAL/ALDH1A3/GATA6/SHH/ZBTB7B/CDKN1C/SALL1/RARG/BCL2/SERPINA5/HOXA3/SERPINE2/ZNF703/PDGFRA/WNT5A/FGF8/WNT3A/ALDH1A2/EDAR/HOXD3
GO:0055123	digestive system development	0.000311286	0.000241514	ENSG00000156574/ENSG00000141448/ENSG00000164690/ENSG00000162878/ENSG00000173406/ENSG00000273707/ENSG00000103449/ENSG00000171791/ENSG00000134853/ENSG00000102678/ENSG00000114251/ENSG00000128918	12	NODAL/GATA6/SHH/PKDCC/DAB1/CDKN1C/SALL1/BCL2/PDGFRA/FGF9/WNT5A/ALDH1A2
GO:0001756	somitogenesis	0.000311286	0.000241514	ENSG00000168646/ENSG00000113722/ENSG00000114251/ENSG00000076356/ENSG00000154342/ENSG00000128918/ENSG00000179111/ENSG00000149922	8	AXIN2/CDX1/WNT5A/PLXNA2/WNT3A/ALDH1A2/HES7/TBX6
GO:0007369	gastrulation	0.000358115	0.000277847	ENSG00000156574/ENSG00000141448/ENSG00000133937/ENSG00000102996/ENSG00000087245/ENSG00000130635/ENSG00000124216/ENSG00000204262/ENSG00000114251/ENSG00000107831/ENSG00000134817/ENSG00000154342/ENSG00000149922	13	NODAL/GATA6/GSC/MMP15/MMP2/COL5A1/SNAI1/COL5A2/WNT5A/FGF8/APLNR/WNT3A/TBX6
GO:0043583	ear development	0.000486826	0.000377708	ENSG00000184254/ENSG00000164690/ENSG00000133937/ENSG00000145864/ENSG00000168505/ENSG00000144749/ENSG00000103449/ENSG00000105991/ENSG00000171791/ENSG00000105996/ENSG00000102678/ENSG00000114251/ENSG00000107831/ENSG00000154342	14	ALDH1A3/SHH/GSC/GABRB2/GBX2/LRIG1/SALL1/HOXA1/BCL2/HOXA2/FGF9/WNT5A/FGF8/WNT3A
GO:0061035	regulation of cartilage development	0.000500794	0.000388545	ENSG00000162878/ENSG00000168646/ENSG00000172819/ENSG00000142871/ENSG00000151388/ENSG00000103056/ENSG00000114251/ENSG00000104415	8	PKDCC/AXIN2/RARG/CCN1/ADAMTS12/SMPD3/WNT5A/CCN4
GO:0060070	canonical Wnt signaling pathway	0.000541236	0.000419923	ENSG00000164690/ENSG00000167191/ENSG00000148737/ENSG00000110888/ENSG00000107263/ENSG00000168646/ENSG00000189319/ENSG00000188803/ENSG00000172819/ENSG00000111186/ENSG00000138795/ENSG00000171843/ENSG00000183779/ENSG00000102678/ENSG00000114251/ENSG00000107831/ENSG00000154342	17	SHH/GPRC5B/TCF7L2/CAPRIN2/RAPGEF1/AXIN2/FAM53B/SHISA6/RARG/WNT5B/LEF1/MLLT3/ZNF703/FGF9/WNT5A/FGF8/WNT3A
GO:0001655	urogenital system development	0.000617598	0.00047917	ENSG00000164690/ENSG00000160712/ENSG00000273707/ENSG00000274636/ENSG00000103449/ENSG00000172819/ENSG00000171791/ENSG00000111077/ENSG00000196549/ENSG00000260027/ENSG00000116106/ENSG00000170961/ENSG00000134853/ENSG00000114251/ENSG00000107831/ENSG00000125931/ENSG00000128918	17	SHH/IL6R/CDKN1C/GLIS2/SALL1/RARG/BCL2/TNS2/MME/HOXB7/EPHA4/HAS2/PDGFRA/WNT5A/FGF8/CITED1/ALDH1A2
GO:0007178	transmembrane receptor protein serine/threonine kinase signaling pathway	0.000617598	0.00047917	ENSG00000156574/ENSG00000164690/ENSG00000157110/ENSG00000273707/ENSG00000140564/ENSG00000089159/ENSG00000026025/ENSG00000142871/ENSG00000148400/ENSG00000128045/ENSG00000103056/ENSG00000183779/ENSG00000168675/ENSG00000102678/ENSG00000114251/ENSG00000107831/ENSG00000125931	17	NODAL/SHH/RBPMS/CDKN1C/FURIN/PXN/VIM/CCN1/NOTCH1/RASL11B/SMPD3/ZNF703/LDLRAD4/FGF9/WNT5A/FGF8/CITED1
GO:0060541	respiratory system development	0.000625725	0.000485475	ENSG00000156574/ENSG00000184254/ENSG00000141448/ENSG00000164690/ENSG00000162878/ENSG00000172819/ENSG00000196549/ENSG00000103056/ENSG00000134853/ENSG00000102678/ENSG00000114251/ENSG00000107831/ENSG00000128918	13	NODAL/ALDH1A3/GATA6/SHH/PKDCC/RARG/MME/SMPD3/PDGFRA/FGF9/WNT5A/FGF8/ALDH1A2
GO:0048565	digestive tract development	0.000625725	0.000485475	ENSG00000156574/ENSG00000141448/ENSG00000164690/ENSG00000162878/ENSG00000173406/ENSG00000103449/ENSG00000171791/ENSG00000134853/ENSG00000102678/ENSG00000114251/ENSG00000128918	11	NODAL/GATA6/SHH/PKDCC/DAB1/SALL1/BCL2/PDGFRA/FGF9/WNT5A/ALDH1A2
GO:0072001	renal system development	0.000625725	0.000485475	ENSG00000164690/ENSG00000160712/ENSG00000273707/ENSG00000274636/ENSG00000103449/ENSG00000171791/ENSG00000111077/ENSG00000196549/ENSG00000260027/ENSG00000116106/ENSG00000170961/ENSG00000134853/ENSG00000114251/ENSG00000107831/ENSG00000125931/ENSG00000128918	16	SHH/IL6R/CDKN1C/GLIS2/SALL1/BCL2/TNS2/MME/HOXB7/EPHA4/HAS2/PDGFRA/WNT5A/FGF8/CITED1/ALDH1A2
GO:0021675	nerve development	0.000768168	0.000595991	ENSG00000145864/ENSG00000144749/ENSG00000103449/ENSG00000105991/ENSG00000173917/ENSG00000105997/ENSG00000135919/ENSG00000128652	8	GABRB2/LRIG1/SALL1/HOXA1/HOXB2/HOXA3/SERPINE2/HOXD3
GO:0007411	axon guidance	0.000813276	0.000630988	ENSG00000164690/ENSG00000101134/ENSG00000128610/ENSG00000173406/ENSG00000168505/ENSG00000184347/ENSG00000116106/ENSG00000105996/ENSG00000114251/ENSG00000107831/ENSG00000187122/ENSG00000154342/ENSG00000182168	13	SHH/DOK5/FEZF1/DAB1/GBX2/SLIT3/EPHA4/HOXA2/WNT5A/FGF8/SLIT1/WNT3A/UNC5C
GO:0097485	neuron projection guidance	0.000875562	0.000679313	ENSG00000164690/ENSG00000101134/ENSG00000128610/ENSG00000173406/ENSG00000168505/ENSG00000184347/ENSG00000116106/ENSG00000105996/ENSG00000114251/ENSG00000107831/ENSG00000187122/ENSG00000154342/ENSG00000182168	13	SHH/DOK5/FEZF1/DAB1/GBX2/SLIT3/EPHA4/HOXA2/WNT5A/FGF8/SLIT1/WNT3A/UNC5C
GO:0042476	odontogenesis	0.000961552	0.000746029	ENSG00000164093/ENSG00000164690/ENSG00000168646/ENSG00000143367/ENSG00000189120/ENSG00000138795/ENSG00000103056/ENSG00000134853/ENSG00000107831/ENSG00000135960	10	PITX2/SHH/AXIN2/TUFT1/SP6/LEF1/SMPD3/PDGFRA/FGF8/EDAR
GO:0021915	neural tube development	0.00106271	0.000824515	ENSG00000156574/ENSG00000164690/ENSG00000133937/ENSG00000168505/ENSG00000172819/ENSG00000164741/ENSG00000114251/ENSG00000107831/ENSG00000076356/ENSG00000154342/ENSG00000128918	11	NODAL/SHH/GSC/GBX2/RARG/DLC1/WNT5A/FGF8/PLXNA2/WNT3A/ALDH1A2
GO:0030177	positive regulation of Wnt signaling pathway	0.00106271	0.000824515	ENSG00000164690/ENSG00000167191/ENSG00000110888/ENSG00000103449/ENSG00000168646/ENSG00000189319/ENSG00000171843/ENSG00000102678/ENSG00000114251/ENSG00000154342/ENSG00000104415/ENSG00000146374	12	SHH/GPRC5B/CAPRIN2/SALL1/AXIN2/FAM53B/MLLT3/FGF9/WNT5A/WNT3A/CCN4/RSPO3
GO:0001822	kidney development	0.00122388	0.000949559	ENSG00000164690/ENSG00000160712/ENSG00000273707/ENSG00000274636/ENSG00000103449/ENSG00000171791/ENSG00000111077/ENSG00000196549/ENSG00000260027/ENSG00000116106/ENSG00000170961/ENSG00000134853/ENSG00000107831/ENSG00000125931/ENSG00000128918	15	SHH/IL6R/CDKN1C/GLIS2/SALL1/BCL2/TNS2/MME/HOXB7/EPHA4/HAS2/PDGFRA/FGF8/CITED1/ALDH1A2
GO:0001704	formation of primary germ layer	0.00122388	0.000949559	ENSG00000156574/ENSG00000141448/ENSG00000102996/ENSG00000087245/ENSG00000130635/ENSG00000124216/ENSG00000204262/ENSG00000114251/ENSG00000154342/ENSG00000149922	10	NODAL/GATA6/MMP15/MMP2/COL5A1/SNAI1/COL5A2/WNT5A/WNT3A/TBX6
GO:0030902	hindbrain development	0.00131364	0.0010192	ENSG00000164690/ENSG00000173406/ENSG00000168505/ENSG00000166165/ENSG00000171791/ENSG00000173917/ENSG00000135919/ENSG00000105996/ENSG00000164741/ENSG00000076356/ENSG00000128918	11	SHH/DAB1/GBX2/CKB/BCL2/HOXB2/SERPINE2/HOXA2/DLC1/PLXNA2/ALDH1A2
GO:0030198	extracellular matrix organization	0.00136268	0.00105725	ENSG00000107742/ENSG00000102996/ENSG00000087245/ENSG00000140564/ENSG00000130635/ENSG00000142871/ENSG00000087303/ENSG00000148400/ENSG00000103056/ENSG00000080573/ENSG00000170961/ENSG00000134853/ENSG00000162733/ENSG00000204262/ENSG00000154342/ENSG00000105855/ENSG00000145681	17	SPOCK2/MMP15/MMP2/FURIN/COL5A1/CCN1/NID2/NOTCH1/SMPD3/COL5A3/HAS2/PDGFRA/DDR2/COL5A2/WNT3A/ITGB8/HAPLN1
GO:0048645	animal organ formation	0.00138961	0.00107815	ENSG00000141448/ENSG00000164690/ENSG00000168646/ENSG00000105997/ENSG00000114251/ENSG00000107831/ENSG00000154342	7	GATA6/SHH/AXIN2/HOXA3/WNT5A/FGF8/WNT3A
GO:0034109	homotypic cell-cell adhesion	0.00151096	0.00117229	ENSG00000181467/ENSG00000046604/ENSG00000111252/ENSG00000158856/ENSG00000135919/ENSG00000183779/ENSG00000134853/ENSG00000154342	8	RAP2B/DSG2/SH2B3/DMTN/SERPINE2/ZNF703/PDGFRA/WNT3A
GO:0043374	CD8-positive, alpha-beta T cell differentiation	0.00154842	0.00120136	ENSG00000160685/ENSG00000182568/ENSG00000171791/ENSG00000020633	4	ZBTB7B/SATB1/BCL2/RUNX3
GO:0048704	embryonic skeletal system morphogenesis	0.00187187	0.00145231	ENSG00000156574/ENSG00000133937/ENSG00000105991/ENSG00000173917/ENSG00000260027/ENSG00000105996/ENSG00000134853/ENSG00000128652	8	NODAL/GSC/HOXA1/HOXB2/HOXB7/HOXA2/PDGFRA/HOXD3
GO:0031589	cell-substrate adhesion	0.0021142	0.00164032	ENSG00000146904/ENSG00000107742/ENSG00000152818/ENSG00000089159/ENSG00000095637/ENSG00000142871/ENSG00000158856/ENSG00000171791/ENSG00000151388/ENSG00000087303/ENSG00000148400/ENSG00000086570/ENSG00000080573/ENSG00000170961/ENSG00000164741/ENSG00000128652	16	EPHA1/SPOCK2/UTRN/PXN/SORBS1/CCN1/DMTN/BCL2/ADAMTS12/NID2/NOTCH1/FAT2/COL5A3/HAS2/DLC1/HOXD3
GO:0060291	long-term synaptic potentiation	0.00212184	0.00164625	ENSG00000158528/ENSG00000166900/ENSG00000163485/ENSG00000196549/ENSG00000135919/ENSG00000116106/ENSG00000183454/ENSG00000100678	8	PPP1R9A/STX3/ADORA1/MME/SERPINE2/EPHA4/GRIN2A/SLC8A3
GO:0001649	osteoblast differentiation	0.00219674	0.00170436	ENSG00000164690/ENSG00000160712/ENSG00000168646/ENSG00000142871/ENSG00000138795/ENSG00000148400/ENSG00000124216/ENSG00000105996/ENSG00000162733/ENSG00000102678/ENSG00000154342/ENSG00000125931/ENSG00000104415	13	SHH/IL6R/AXIN2/CCN1/LEF1/NOTCH1/SNAI1/HOXA2/DDR2/FGF9/WNT3A/CITED1/CCN4
GO:0043062	extracellular structure organization	0.00219674	0.00170436	ENSG00000107742/ENSG00000102996/ENSG00000087245/ENSG00000140564/ENSG00000130635/ENSG00000142871/ENSG00000087303/ENSG00000148400/ENSG00000103056/ENSG00000080573/ENSG00000170961/ENSG00000134853/ENSG00000162733/ENSG00000204262/ENSG00000154342/ENSG00000105855/ENSG00000145681/ENSG00000160179	18	SPOCK2/MMP15/MMP2/FURIN/COL5A1/CCN1/NID2/NOTCH1/SMPD3/COL5A3/HAS2/PDGFRA/DDR2/COL5A2/WNT3A/ITGB8/HAPLN1/ABCG1
GO:0060324	face development	0.00227348	0.0017639	ENSG00000184254/ENSG00000087245/ENSG00000172819/ENSG00000134853/ENSG00000114251/ENSG00000128918	6	ALDH1A3/MMP2/RARG/PDGFRA/WNT5A/ALDH1A2
GO:0001837	epithelial to mesenchymal transition	0.00228372	0.00177184	ENSG00000133937/ENSG00000168646/ENSG00000138795/ENSG00000148400/ENSG00000124216/ENSG00000183779/ENSG00000170961/ENSG00000168675/ENSG00000114251/ENSG00000107831	10	GSC/AXIN2/LEF1/NOTCH1/SNAI1/ZNF703/HAS2/LDLRAD4/WNT5A/FGF8
GO:0030900	forebrain development	0.00272622	0.00211517	ENSG00000164093/ENSG00000184254/ENSG00000164690/ENSG00000133937/ENSG00000128610/ENSG00000173406/ENSG00000168505/ENSG00000103449/ENSG00000165300/ENSG00000164741/ENSG00000114251/ENSG00000107831/ENSG00000183023/ENSG00000187122/ENSG00000154342/ENSG00000128918/ENSG00000100678	17	PITX2/ALDH1A3/SHH/GSC/FEZF1/DAB1/GBX2/SALL1/SLITRK5/DLC1/WNT5A/FGF8/SLC8A1/SLIT1/WNT3A/ALDH1A2/SLC8A3
GO:0060828	regulation of canonical Wnt signaling pathway	0.00272622	0.00211517	ENSG00000164690/ENSG00000167191/ENSG00000148737/ENSG00000110888/ENSG00000107263/ENSG00000168646/ENSG00000189319/ENSG00000188803/ENSG00000111186/ENSG00000171843/ENSG00000183779/ENSG00000102678/ENSG00000114251/ENSG00000154342	14	SHH/GPRC5B/TCF7L2/CAPRIN2/RAPGEF1/AXIN2/FAM53B/SHISA6/WNT5B/MLLT3/ZNF703/FGF9/WNT5A/WNT3A
GO:0030324	lung development	0.00272622	0.00211517	ENSG00000156574/ENSG00000141448/ENSG00000164690/ENSG00000162878/ENSG00000196549/ENSG00000103056/ENSG00000134853/ENSG00000102678/ENSG00000114251/ENSG00000107831/ENSG00000128918	11	NODAL/GATA6/SHH/PKDCC/MME/SMPD3/PDGFRA/FGF9/WNT5A/FGF8/ALDH1A2
GO:0009953	dorsal/ventral pattern formation	0.00272622	0.00211517	ENSG00000164690/ENSG00000133937/ENSG00000164651/ENSG00000173917/ENSG00000106038/ENSG00000105996/ENSG00000107831/ENSG00000154342	8	SHH/GSC/SP8/HOXB2/EVX1/HOXA2/FGF8/WNT3A
GO:0048566	embryonic digestive tract development	0.00289106	0.00224306	ENSG00000164690/ENSG00000162878/ENSG00000103449/ENSG00000134853/ENSG00000102678/ENSG00000128918	6	SHH/PKDCC/SALL1/PDGFRA/FGF9/ALDH1A2
GO:0030278	regulation of ossification	0.00289106	0.00224306	ENSG00000160712/ENSG00000162878/ENSG00000168646/ENSG00000142871/ENSG00000171791/ENSG00000148400/ENSG00000105996/ENSG00000162733/ENSG00000114251/ENSG00000183023/ENSG00000125931/ENSG00000104415	12	IL6R/PKDCC/AXIN2/CCN1/BCL2/NOTCH1/HOXA2/DDR2/WNT5A/SLC8A1/CITED1/CCN4
GO:0050769	positive regulation of neurogenesis	0.00289106	0.00224306	ENSG00000164690/ENSG00000077264/ENSG00000128610/ENSG00000124507/ENSG00000173406/ENSG00000167191/ENSG00000158528/ENSG00000167178/ENSG00000110888/ENSG00000107263/ENSG00000171791/ENSG00000182158/ENSG00000148400/ENSG00000196549/ENSG00000135919/ENSG00000116106/ENSG00000114251/ENSG00000154342/ENSG00000128652	19	SHH/PAK3/FEZF1/PACSIN1/DAB1/GPRC5B/PPP1R9A/ISLR2/CAPRIN2/RAPGEF1/BCL2/CREB3L2/NOTCH1/MME/SERPINE2/EPHA4/WNT5A/WNT3A/HOXD3
GO:0061097	regulation of protein tyrosine kinase activity	0.00297144	0.00230542	ENSG00000013364/ENSG00000167191/ENSG00000181467/ENSG00000163485/ENSG00000169129/ENSG00000116106/ENSG00000154342/ENSG00000163235	8	MVP/GPRC5B/RAP2B/ADORA1/AFAP1L2/EPHA4/WNT3A/TGFA
GO:0030323	respiratory tube development	0.0030049	0.00233138	ENSG00000156574/ENSG00000141448/ENSG00000164690/ENSG00000162878/ENSG00000196549/ENSG00000103056/ENSG00000134853/ENSG00000102678/ENSG00000114251/ENSG00000107831/ENSG00000128918	11	NODAL/GATA6/SHH/PKDCC/MME/SMPD3/PDGFRA/FGF9/WNT5A/FGF8/ALDH1A2
GO:0007409	axonogenesis	0.0030049	0.00233138	ENSG00000164690/ENSG00000101134/ENSG00000077264/ENSG00000128610/ENSG00000173406/ENSG00000168505/ENSG00000167178/ENSG00000171791/ENSG00000184347/ENSG00000116106/ENSG00000105996/ENSG00000140937/ENSG00000114251/ENSG00000107831/ENSG00000187122/ENSG00000154342/ENSG00000182168	17	SHH/DOK5/PAK3/FEZF1/DAB1/GBX2/ISLR2/BCL2/SLIT3/EPHA4/HOXA2/CDH11/WNT5A/FGF8/SLIT1/WNT3A/UNC5C
GO:0048736	appendage development	0.0030584	0.00237289	ENSG00000164093/ENSG00000164690/ENSG00000162878/ENSG00000103449/ENSG00000164651/ENSG00000172819/ENSG00000102678/ENSG00000114251/ENSG00000107831/ENSG00000076356/ENSG00000128918	11	PITX2/SHH/PKDCC/SALL1/SP8/RARG/FGF9/WNT5A/FGF8/PLXNA2/ALDH1A2
GO:0060173	limb development	0.0030584	0.00237289	ENSG00000164093/ENSG00000164690/ENSG00000162878/ENSG00000103449/ENSG00000164651/ENSG00000172819/ENSG00000102678/ENSG00000114251/ENSG00000107831/ENSG00000076356/ENSG00000128918	11	PITX2/SHH/PKDCC/SALL1/SP8/RARG/FGF9/WNT5A/FGF8/PLXNA2/ALDH1A2
GO:0010718	positive regulation of epithelial to mesenchymal transition	0.00330312	0.00256276	ENSG00000148737/ENSG00000168646/ENSG00000138795/ENSG00000148400/ENSG00000124216/ENSG00000183779	6	TCF7L2/AXIN2/LEF1/NOTCH1/SNAI1/ZNF703
GO:0035107	appendage morphogenesis	0.0033205	0.00257624	ENSG00000164690/ENSG00000162878/ENSG00000103449/ENSG00000164651/ENSG00000172819/ENSG00000102678/ENSG00000114251/ENSG00000107831/ENSG00000076356/ENSG00000128918	10	SHH/PKDCC/SALL1/SP8/RARG/FGF9/WNT5A/FGF8/PLXNA2/ALDH1A2
GO:0035108	limb morphogenesis	0.0033205	0.00257624	ENSG00000164690/ENSG00000162878/ENSG00000103449/ENSG00000164651/ENSG00000172819/ENSG00000102678/ENSG00000114251/ENSG00000107831/ENSG00000076356/ENSG00000128918	10	SHH/PKDCC/SALL1/SP8/RARG/FGF9/WNT5A/FGF8/PLXNA2/ALDH1A2
GO:0035987	endodermal cell differentiation	0.00353994	0.0027465	ENSG00000156574/ENSG00000141448/ENSG00000102996/ENSG00000087245/ENSG00000130635/ENSG00000204262	6	NODAL/GATA6/MMP15/MMP2/COL5A1/COL5A2
GO:0050730	regulation of peptidyl-tyrosine phosphorylation	0.00406506	0.00315392	ENSG00000160712/ENSG00000013364/ENSG00000167191/ENSG00000181467/ENSG00000145214/ENSG00000111252/ENSG00000158856/ENSG00000163485/ENSG00000169129/ENSG00000116106/ENSG00000107831/ENSG00000154342/ENSG00000163235	13	IL6R/MVP/GPRC5B/RAP2B/DGKQ/SH2B3/DMTN/ADORA1/AFAP1L2/EPHA4/FGF8/WNT3A/TGFA
GO:0021536	diencephalon development	0.00407248	0.00315967	ENSG00000164093/ENSG00000164690/ENSG00000168505/ENSG00000103449/ENSG00000114251/ENSG00000107831/ENSG00000128918	7	PITX2/SHH/GBX2/SALL1/WNT5A/FGF8/ALDH1A2
GO:0090092	regulation of transmembrane receptor protein serine/threonine kinase signaling pathway	0.00420505	0.00326253	ENSG00000156574/ENSG00000164690/ENSG00000157110/ENSG00000273707/ENSG00000142871/ENSG00000148400/ENSG00000128045/ENSG00000183779/ENSG00000168675/ENSG00000102678/ENSG00000114251/ENSG00000125931	12	NODAL/SHH/RBPMS/CDKN1C/CCN1/NOTCH1/RASL11B/ZNF703/LDLRAD4/FGF9/WNT5A/CITED1
GO:0031016	pancreas development	0.00430764	0.00334212	ENSG00000141448/ENSG00000164690/ENSG00000160712/ENSG00000148737/ENSG00000134138/ENSG00000114251/ENSG00000128918	7	GATA6/SHH/IL6R/TCF7L2/MEIS2/WNT5A/ALDH1A2
GO:0042472	inner ear morphogenesis	0.00465025	0.00360794	ENSG00000184254/ENSG00000168505/ENSG00000144749/ENSG00000105991/ENSG00000102678/ENSG00000114251/ENSG00000107831/ENSG00000154342	8	ALDH1A3/GBX2/LRIG1/HOXA1/FGF9/WNT5A/FGF8/WNT3A
GO:0007498	mesoderm development	0.00473394	0.00367288	ENSG00000156574/ENSG00000164690/ENSG00000124216/ENSG00000106484/ENSG00000114251/ENSG00000107831/ENSG00000154342/ENSG00000179111/ENSG00000149922	9	NODAL/SHH/SNAI1/MEST/WNT5A/FGF8/WNT3A/HES7/TBX6
GO:0023019	signal transduction involved in regulation of gene expression	0.00487807	0.0037847	ENSG00000133937/ENSG00000134853/ENSG00000107831/ENSG00000149922	4	GSC/PDGFRA/FGF8/TBX6
GO:0016202	regulation of striated muscle tissue development	0.00487807	0.0037847	ENSG00000141448/ENSG00000164690/ENSG00000186260/ENSG00000171791/ENSG00000138795/ENSG00000148400/ENSG00000149596/ENSG00000102678/ENSG00000107831/ENSG00000154342	10	GATA6/SHH/MRTFB/BCL2/LEF1/NOTCH1/JPH2/FGF9/FGF8/WNT3A
GO:0050679	positive regulation of epithelial cell proliferation	0.00487807	0.0037847	ENSG00000156574/ENSG00000164690/ENSG00000148737/ENSG00000183779/ENSG00000170961/ENSG00000102678/ENSG00000006606/ENSG00000114251/ENSG00000134817/ENSG00000154342/ENSG00000163235	11	NODAL/SHH/TCF7L2/ZNF703/HAS2/FGF9/CCL26/WNT5A/APLNR/WNT3A/TGFA
GO:0010762	regulation of fibroblast migration	0.00515384	0.00399866	ENSG00000077264/ENSG00000131016/ENSG00000158856/ENSG00000162733/ENSG00000183023	5	PAK3/AKAP12/DMTN/DDR2/SLC8A1
GO:0045995	regulation of embryonic development	0.0052609	0.00408172	ENSG00000156574/ENSG00000164690/ENSG00000130635/ENSG00000113722/ENSG00000124216/ENSG00000204262/ENSG00000114251/ENSG00000154342/ENSG00000179111	9	NODAL/SHH/COL5A1/CDX1/SNAI1/COL5A2/WNT5A/WNT3A/HES7
GO:0060562	epithelial tube morphogenesis	0.00531828	0.00412624	ENSG00000156574/ENSG00000164690/ENSG00000168505/ENSG00000103449/ENSG00000172819/ENSG00000171791/ENSG00000151388/ENSG00000148400/ENSG00000260027/ENSG00000116106/ENSG00000164741/ENSG00000114251/ENSG00000107831/ENSG00000154342/ENSG00000125931	15	NODAL/SHH/GBX2/SALL1/RARG/BCL2/ADAMTS12/NOTCH1/HOXB7/EPHA4/DLC1/WNT5A/FGF8/WNT3A/CITED1
GO:1901861	regulation of muscle tissue development	0.00534415	0.00414631	ENSG00000141448/ENSG00000164690/ENSG00000186260/ENSG00000171791/ENSG00000138795/ENSG00000148400/ENSG00000149596/ENSG00000102678/ENSG00000107831/ENSG00000154342	10	GATA6/SHH/MRTFB/BCL2/LEF1/NOTCH1/JPH2/FGF9/FGF8/WNT3A
GO:0048634	regulation of muscle organ development	0.00552782	0.00428881	ENSG00000141448/ENSG00000164690/ENSG00000186260/ENSG00000171791/ENSG00000138795/ENSG00000148400/ENSG00000149596/ENSG00000102678/ENSG00000107831/ENSG00000154342	10	GATA6/SHH/MRTFB/BCL2/LEF1/NOTCH1/JPH2/FGF9/FGF8/WNT3A
GO:0030878	thyroid gland development	0.00552782	0.00428881	ENSG00000164690/ENSG00000105997/ENSG00000107831/ENSG00000128652	4	SHH/HOXA3/FGF8/HOXD3
GO:0007492	endoderm development	0.00552782	0.00428881	ENSG00000156574/ENSG00000141448/ENSG00000102996/ENSG00000087245/ENSG00000130635/ENSG00000204262/ENSG00000107831	7	NODAL/GATA6/MMP15/MMP2/COL5A1/COL5A2/FGF8
GO:0001706	endoderm formation	0.00586789	0.00455265	ENSG00000156574/ENSG00000141448/ENSG00000102996/ENSG00000087245/ENSG00000130635/ENSG00000204262	6	NODAL/GATA6/MMP15/MMP2/COL5A1/COL5A2
GO:0048846	axon extension involved in axon guidance	0.00639375	0.00496065	ENSG00000184347/ENSG00000114251/ENSG00000187122/ENSG00000154342	4	SLIT3/WNT5A/SLIT1/WNT3A
GO:0097503	sialylation	0.00639375	0.00496065	ENSG00000177511/ENSG00000144057/ENSG00000070731/ENSG00000148488	4	ST8SIA3/ST6GAL2/ST6GALNAC2/ST8SIA6
GO:1902284	neuron projection extension involved in neuron projection guidance	0.00639375	0.00496065	ENSG00000184347/ENSG00000114251/ENSG00000187122/ENSG00000154342	4	SLIT3/WNT5A/SLIT1/WNT3A
GO:0032963	collagen metabolic process	0.00641246	0.00497517	ENSG00000102996/ENSG00000087245/ENSG00000140564/ENSG00000026025/ENSG00000065308/ENSG00000130635/ENSG00000111077/ENSG00000103056	8	MMP15/MMP2/FURIN/VIM/TRAM2/COL5A1/TNS2/SMPD3
GO:0001654	eye development	0.00658197	0.00510668	ENSG00000164093/ENSG00000184254/ENSG00000164690/ENSG00000273707/ENSG00000026025/ENSG00000172819/ENSG00000111186/ENSG00000130635/ENSG00000171791/ENSG00000134138/ENSG00000134853/ENSG00000102678/ENSG00000204262/ENSG00000114251/ENSG00000128918	15	PITX2/ALDH1A3/SHH/CDKN1C/VIM/RARG/WNT5B/COL5A1/BCL2/MEIS2/PDGFRA/FGF9/COL5A2/WNT5A/ALDH1A2
GO:0021532	neural tube patterning	0.00658197	0.00510668	ENSG00000164690/ENSG00000133937/ENSG00000168505/ENSG00000107831/ENSG00000154342	5	SHH/GSC/GBX2/FGF8/WNT3A
GO:0045666	positive regulation of neuron differentiation	0.00707435	0.0054887	ENSG00000077264/ENSG00000128610/ENSG00000124507/ENSG00000173406/ENSG00000167191/ENSG00000158528/ENSG00000167178/ENSG00000110888/ENSG00000107263/ENSG00000171791/ENSG00000182158/ENSG00000116106/ENSG00000114251/ENSG00000154342/ENSG00000128652	15	PAK3/FEZF1/PACSIN1/DAB1/GPRC5B/PPP1R9A/ISLR2/CAPRIN2/RAPGEF1/BCL2/CREB3L2/EPHA4/WNT5A/WNT3A/HOXD3
GO:0001947	heart looping	0.00710572	0.00551304	ENSG00000156574/ENSG00000164690/ENSG00000148400/ENSG00000114251/ENSG00000107831/ENSG00000154342	6	NODAL/SHH/NOTCH1/WNT5A/FGF8/WNT3A
GO:0150063	visual system development	0.00713504	0.00553579	ENSG00000164093/ENSG00000184254/ENSG00000164690/ENSG00000273707/ENSG00000026025/ENSG00000172819/ENSG00000111186/ENSG00000130635/ENSG00000171791/ENSG00000134138/ENSG00000134853/ENSG00000102678/ENSG00000204262/ENSG00000114251/ENSG00000128918	15	PITX2/ALDH1A3/SHH/CDKN1C/VIM/RARG/WNT5B/COL5A1/BCL2/MEIS2/PDGFRA/FGF9/COL5A2/WNT5A/ALDH1A2
GO:0061564	axon development	0.00813915	0.00631484	ENSG00000164690/ENSG00000101134/ENSG00000077264/ENSG00000128610/ENSG00000173406/ENSG00000168505/ENSG00000167178/ENSG00000171791/ENSG00000184347/ENSG00000116106/ENSG00000105996/ENSG00000140937/ENSG00000114251/ENSG00000107831/ENSG00000187122/ENSG00000154342/ENSG00000182168	17	SHH/DOK5/PAK3/FEZF1/DAB1/GBX2/ISLR2/BCL2/SLIT3/EPHA4/HOXA2/CDH11/WNT5A/FGF8/SLIT1/WNT3A/UNC5C
GO:0061098	positive regulation of protein tyrosine kinase activity	0.00813915	0.00631484	ENSG00000167191/ENSG00000163485/ENSG00000169129/ENSG00000116106/ENSG00000154342/ENSG00000163235	6	GPRC5B/ADORA1/AFAP1L2/EPHA4/WNT3A/TGFA
GO:0070527	platelet aggregation	0.00813915	0.00631484	ENSG00000181467/ENSG00000111252/ENSG00000158856/ENSG00000135919/ENSG00000134853/ENSG00000154342	6	RAP2B/SH2B3/DMTN/SERPINE2/PDGFRA/WNT3A
GO:0008045	motor neuron axon guidance	0.00835989	0.0064861	ENSG00000116106/ENSG00000105996/ENSG00000107831/ENSG00000187122	4	EPHA4/HOXA2/FGF8/SLIT1
GO:0045165	cell fate commitment	0.00851222	0.00660429	ENSG00000156574/ENSG00000141448/ENSG00000164690/ENSG00000133937/ENSG00000160685/ENSG00000148737/ENSG00000171791/ENSG00000106038/ENSG00000105996/ENSG00000107831/ENSG00000154342/ENSG00000149922	12	NODAL/GATA6/SHH/GSC/ZBTB7B/TCF7L2/BCL2/EVX1/HOXA2/FGF8/WNT3A/TBX6
GO:0001658	branching involved in ureteric bud morphogenesis	0.00851222	0.00660429	ENSG00000164690/ENSG00000103449/ENSG00000171791/ENSG00000260027/ENSG00000107831/ENSG00000125931	6	SHH/SALL1/BCL2/HOXB7/FGF8/CITED1
GO:0014031	mesenchymal cell development	0.00851222	0.00660429	ENSG00000164093/ENSG00000164690/ENSG00000168505/ENSG00000171791/ENSG00000148400/ENSG00000128918	6	PITX2/SHH/GBX2/BCL2/NOTCH1/ALDH1A2
GO:0035148	tube formation	0.00851222	0.00660429	ENSG00000156574/ENSG00000164690/ENSG00000172819/ENSG00000105991/ENSG00000148400/ENSG00000164741/ENSG00000114251/ENSG00000107831/ENSG00000135960	9	NODAL/SHH/RARG/HOXA1/NOTCH1/DLC1/WNT5A/FGF8/EDAR
GO:0060402	calcium ion transport into cytosol	0.00879306	0.00682218	ENSG00000018625/ENSG00000198947/ENSG00000171791/ENSG00000149596/ENSG00000150995/ENSG00000183454/ENSG00000183023/ENSG00000134817/ENSG00000100678	9	ATP1A2/DMD/BCL2/JPH2/ITPR1/GRIN2A/SLC8A1/APLNR/SLC8A3
GO:0010721	negative regulation of cell development	0.00879306	0.00682218	ENSG00000156574/ENSG00000164690/ENSG00000173406/ENSG00000132359/ENSG00000166450/ENSG00000026025/ENSG00000158856/ENSG00000171791/ENSG00000148400/ENSG00000116106/ENSG00000105996/ENSG00000114251/ENSG00000154342/ENSG00000149922	14	NODAL/SHH/DAB1/RAP1GAP2/PRTG/VIM/DMTN/BCL2/NOTCH1/EPHA4/HOXA2/WNT5A/WNT3A/TBX6
GO:0030178	negative regulation of Wnt signaling pathway	0.0089132	0.00691539	ENSG00000164690/ENSG00000133937/ENSG00000148737/ENSG00000107263/ENSG00000168646/ENSG00000188803/ENSG00000111186/ENSG00000171843/ENSG00000102678/ENSG00000114251/ENSG00000125931	11	SHH/GSC/TCF7L2/RAPGEF1/AXIN2/SHISA6/WNT5B/MLLT3/FGF9/WNT5A/CITED1
GO:0048880	sensory system development	0.00893064	0.00692892	ENSG00000164093/ENSG00000184254/ENSG00000164690/ENSG00000273707/ENSG00000026025/ENSG00000172819/ENSG00000111186/ENSG00000130635/ENSG00000171791/ENSG00000134138/ENSG00000134853/ENSG00000102678/ENSG00000204262/ENSG00000114251/ENSG00000128918	15	PITX2/ALDH1A3/SHH/CDKN1C/VIM/RARG/WNT5B/COL5A1/BCL2/MEIS2/PDGFRA/FGF9/COL5A2/WNT5A/ALDH1A2
GO:0048857	neural nucleus development	0.00928842	0.00720651	ENSG00000184254/ENSG00000166165/ENSG00000171791/ENSG00000173917/ENSG00000123560/ENSG00000102678	6	ALDH1A3/CKB/BCL2/HOXB2/PLP1/FGF9
GO:0061371	determination of heart left/right asymmetry	0.00928842	0.00720651	ENSG00000156574/ENSG00000164690/ENSG00000148400/ENSG00000114251/ENSG00000107831/ENSG00000154342	6	NODAL/SHH/NOTCH1/WNT5A/FGF8/WNT3A
GO:0048708	astrocyte differentiation	0.00928842	0.00720651	ENSG00000164690/ENSG00000173406/ENSG00000026025/ENSG00000148400/ENSG00000123560/ENSG00000135919/ENSG00000116106	7	SHH/DAB1/VIM/NOTCH1/PLP1/SERPINE2/EPHA4
GO:0090100	positive regulation of transmembrane receptor protein serine/threonine kinase signaling pathway	0.00928842	0.00720651	ENSG00000156574/ENSG00000157110/ENSG00000273707/ENSG00000142871/ENSG00000148400/ENSG00000102678/ENSG00000125931	7	NODAL/RBPMS/CDKN1C/CCN1/NOTCH1/FGF9/CITED1
GO:0010761	fibroblast migration	0.00952505	0.0073901	ENSG00000077264/ENSG00000131016/ENSG00000158856/ENSG00000162733/ENSG00000183023	5	PAK3/AKAP12/DMTN/DDR2/SLC8A1
GO:0098659	inorganic cation import across plasma membrane	0.00952505	0.0073901	ENSG00000018625/ENSG00000162989/ENSG00000183023/ENSG00000100678/ENSG00000120457	5	ATP1A2/KCNJ3/SLC8A1/SLC8A3/KCNJ5
GO:0099587	inorganic ion import across plasma membrane	0.00952505	0.0073901	ENSG00000018625/ENSG00000162989/ENSG00000183023/ENSG00000100678/ENSG00000120457	5	ATP1A2/KCNJ3/SLC8A1/SLC8A3/KCNJ5
GO:0060021	roof of mouth development	0.00952505	0.0073901	ENSG00000164690/ENSG00000162878/ENSG00000138795/ENSG00000124216/ENSG00000134853/ENSG00000114251/ENSG00000154342	7	SHH/PKDCC/LEF1/SNAI1/PDGFRA/WNT5A/WNT3A
GO:0034330	cell junction organization	0.00952505	0.0073901	ENSG00000166689/ENSG00000082397/ENSG00000107263/ENSG00000095637/ENSG00000046604/ENSG00000128591/ENSG00000158856/ENSG00000171791/ENSG00000113361/ENSG00000124216/ENSG00000183779/ENSG00000164741/ENSG00000140937	13	PLEKHA7/EPB41L3/RAPGEF1/SORBS1/DSG2/FLNC/DMTN/BCL2/CDH6/SNAI1/ZNF703/DLC1/CDH11
GO:0003143	embryonic heart tube morphogenesis	0.00957146	0.00742611	ENSG00000156574/ENSG00000164690/ENSG00000148400/ENSG00000114251/ENSG00000107831/ENSG00000154342	6	NODAL/SHH/NOTCH1/WNT5A/FGF8/WNT3A
GO:0010717	regulation of epithelial to mesenchymal transition	0.00996279	0.00772973	ENSG00000148737/ENSG00000168646/ENSG00000138795/ENSG00000148400/ENSG00000124216/ENSG00000183779/ENSG00000168675	7	TCF7L2/AXIN2/LEF1/NOTCH1/SNAI1/ZNF703/LDLRAD4
GO:0034765	regulation of ion transmembrane transport	0.0100361	0.00778662	ENSG00000018625/ENSG00000152818/ENSG00000175497/ENSG00000196730/ENSG00000198947/ENSG00000149596/ENSG00000124942/ENSG00000122986/ENSG00000100346/ENSG00000278232/ENSG00000198216/ENSG00000162989/ENSG00000183454/ENSG00000183023/ENSG00000134817/ENSG00000185760/ENSG00000120457	17	ATP1A2/UTRN/DPP10/DAPK1/DMD/JPH2/AHNAK/HVCN1/CACNA1I/CRHR1/CACNA1E/KCNJ3/GRIN2A/SLC8A1/APLNR/KCNQ5/KCNJ5
GO:0021983	pituitary gland development	0.0101161	0.00784867	ENSG00000164093/ENSG00000103449/ENSG00000114251/ENSG00000107831/ENSG00000128918	5	PITX2/SALL1/WNT5A/FGF8/ALDH1A2
GO:1905475	regulation of protein localization to membrane	0.0101353	0.00786359	ENSG00000162878/ENSG00000175497/ENSG00000120756/ENSG00000103653/ENSG00000166900/ENSG00000188803/ENSG00000095637/ENSG00000158856/ENSG00000171791/ENSG00000154342	10	PKDCC/DPP10/PLS1/CSK/STX3/SHISA6/SORBS1/DMTN/BCL2/WNT3A
GO:0009855	determination of bilateral symmetry	0.0105086	0.0081532	ENSG00000164093/ENSG00000156574/ENSG00000164690/ENSG00000148400/ENSG00000114251/ENSG00000107831/ENSG00000154342/ENSG00000128918	8	PITX2/NODAL/SHH/NOTCH1/WNT5A/FGF8/WNT3A/ALDH1A2
GO:0003413	chondrocyte differentiation involved in endochondral bone morphogenesis	0.0105086	0.0081532	ENSG00000168646/ENSG00000172819/ENSG00000103056	3	AXIN2/RARG/SMPD3
GO:0099566	regulation of postsynaptic cytosolic calcium ion concentration	0.0105086	0.0081532	ENSG00000150995/ENSG00000114251/ENSG00000183023	3	ITPR1/WNT5A/SLC8A1
GO:0009799	specification of symmetry	0.0105844	0.00821203	ENSG00000164093/ENSG00000156574/ENSG00000164690/ENSG00000148400/ENSG00000114251/ENSG00000107831/ENSG00000154342/ENSG00000128918	8	PITX2/NODAL/SHH/NOTCH1/WNT5A/FGF8/WNT3A/ALDH1A2
GO:0033135	regulation of peptidyl-serine phosphorylation	0.0105844	0.00821203	ENSG00000110888/ENSG00000144580/ENSG00000198947/ENSG00000158856/ENSG00000171791/ENSG00000009694/ENSG00000114251/ENSG00000154342	8	CAPRIN2/CNOT9/DMD/DMTN/BCL2/TENM1/WNT5A/WNT3A
GO:0034110	regulation of homotypic cell-cell adhesion	0.0105844	0.00821203	ENSG00000111252/ENSG00000158856/ENSG00000135919/ENSG00000183779	4	SH2B3/DMTN/SERPINE2/ZNF703
GO:0045992	negative regulation of embryonic development	0.0105844	0.00821203	ENSG00000130635/ENSG00000124216/ENSG00000204262/ENSG00000114251	4	COL5A1/SNAI1/COL5A2/WNT5A
GO:0050919	negative chemotaxis	0.0105844	0.00821203	ENSG00000184347/ENSG00000114251/ENSG00000187122/ENSG00000182168	4	SLIT3/WNT5A/SLIT1/UNC5C
GO:0048738	cardiac muscle tissue development	0.010977	0.00851659	ENSG00000141448/ENSG00000046604/ENSG00000148400/ENSG00000149596/ENSG00000134853/ENSG00000102678/ENSG00000114251/ENSG00000107831/ENSG00000183023/ENSG00000154342/ENSG00000128918	11	GATA6/DSG2/NOTCH1/JPH2/PDGFRA/FGF9/WNT5A/FGF8/SLC8A1/WNT3A/ALDH1A2
GO:0070588	calcium ion transmembrane transport	0.0111455	0.00864734	ENSG00000018625/ENSG00000198947/ENSG00000149596/ENSG00000124942/ENSG00000150995/ENSG00000100346/ENSG00000278232/ENSG00000198216/ENSG00000183454/ENSG00000183023/ENSG00000134817/ENSG00000154342/ENSG00000100678	13	ATP1A2/DMD/JPH2/AHNAK/ITPR1/CACNA1I/CRHR1/CACNA1E/GRIN2A/SLC8A1/APLNR/WNT3A/SLC8A3
GO:0048839	inner ear development	0.0113765	0.00882659	ENSG00000184254/ENSG00000164690/ENSG00000145864/ENSG00000168505/ENSG00000144749/ENSG00000105991/ENSG00000102678/ENSG00000114251/ENSG00000107831/ENSG00000154342	10	ALDH1A3/SHH/GABRB2/GBX2/LRIG1/HOXA1/FGF9/WNT5A/FGF8/WNT3A
GO:0014706	striated muscle tissue development	0.0113993	0.00884428	ENSG00000141448/ENSG00000164690/ENSG00000186260/ENSG00000046604/ENSG00000171791/ENSG00000138795/ENSG00000148400/ENSG00000149596/ENSG00000134853/ENSG00000102678/ENSG00000114251/ENSG00000107831/ENSG00000183023/ENSG00000154342/ENSG00000128918	15	GATA6/SHH/MRTFB/DSG2/BCL2/LEF1/NOTCH1/JPH2/PDGFRA/FGF9/WNT5A/FGF8/SLC8A1/WNT3A/ALDH1A2
GO:0007160	cell-matrix adhesion	0.0118263	0.00917555	ENSG00000146904/ENSG00000152818/ENSG00000089159/ENSG00000095637/ENSG00000158856/ENSG00000171791/ENSG00000151388/ENSG00000087303/ENSG00000080573/ENSG00000164741/ENSG00000128652	11	EPHA1/UTRN/PXN/SORBS1/DMTN/BCL2/ADAMTS12/NID2/COL5A3/DLC1/HOXD3
GO:0007596	blood coagulation	0.0118263	0.00917555	ENSG00000141448/ENSG00000124491/ENSG00000164690/ENSG00000157680/ENSG00000181467/ENSG00000145214/ENSG00000111252/ENSG00000158856/ENSG00000069974/ENSG00000188488/ENSG00000150995/ENSG00000135919/ENSG00000134853/ENSG00000154342	14	GATA6/F13A1/SHH/DGKI/RAP2B/DGKQ/SH2B3/DMTN/RAB27A/SERPINA5/ITPR1/SERPINE2/PDGFRA/WNT3A
GO:0045778	positive regulation of ossification	0.0118263	0.00917555	ENSG00000160712/ENSG00000162878/ENSG00000142871/ENSG00000162733/ENSG00000114251/ENSG00000183023/ENSG00000104415	7	IL6R/PKDCC/CCN1/DDR2/WNT5A/SLC8A1/CCN4
GO:0060675	ureteric bud morphogenesis	0.011996	0.00930721	ENSG00000164690/ENSG00000103449/ENSG00000171791/ENSG00000260027/ENSG00000107831/ENSG00000125931	6	SHH/SALL1/BCL2/HOXB7/FGF8/CITED1
GO:0030326	embryonic limb morphogenesis	0.011996	0.00930721	ENSG00000164690/ENSG00000103449/ENSG00000164651/ENSG00000172819/ENSG00000102678/ENSG00000114251/ENSG00000107831/ENSG00000128918	8	SHH/SALL1/SP8/RARG/FGF9/WNT5A/FGF8/ALDH1A2
GO:0035113	embryonic appendage morphogenesis	0.011996	0.00930721	ENSG00000164690/ENSG00000103449/ENSG00000164651/ENSG00000172819/ENSG00000102678/ENSG00000114251/ENSG00000107831/ENSG00000128918	8	SHH/SALL1/SP8/RARG/FGF9/WNT5A/FGF8/ALDH1A2
GO:0045844	positive regulation of striated muscle tissue development	0.011996	0.00930721	ENSG00000141448/ENSG00000164690/ENSG00000186260/ENSG00000171791/ENSG00000148400/ENSG00000102678/ENSG00000154342	7	GATA6/SHH/MRTFB/BCL2/NOTCH1/FGF9/WNT3A
GO:0048636	positive regulation of muscle organ development	0.011996	0.00930721	ENSG00000141448/ENSG00000164690/ENSG00000186260/ENSG00000171791/ENSG00000148400/ENSG00000102678/ENSG00000154342	7	GATA6/SHH/MRTFB/BCL2/NOTCH1/FGF9/WNT3A
GO:1903076	regulation of protein localization to plasma membrane	0.011996	0.00930721	ENSG00000162878/ENSG00000175497/ENSG00000120756/ENSG00000103653/ENSG00000166900/ENSG00000095637/ENSG00000154342	7	PKDCC/DPP10/PLS1/CSK/STX3/SORBS1/WNT3A
GO:0048505	regulation of timing of cell differentiation	0.011996	0.00930721	ENSG00000156574/ENSG00000135919/ENSG00000102678	3	NODAL/SERPINE2/FGF9
GO:2000052	positive regulation of non-canonical Wnt signaling pathway	0.011996	0.00930721	ENSG00000171843/ENSG00000114251/ENSG00000146374	3	MLLT3/WNT5A/RSPO3
GO:0097553	calcium ion transmembrane import into cytosol	0.012127	0.00940883	ENSG00000018625/ENSG00000198947/ENSG00000149596/ENSG00000150995/ENSG00000183454/ENSG00000183023/ENSG00000134817/ENSG00000100678	8	ATP1A2/DMD/JPH2/ITPR1/GRIN2A/SLC8A1/APLNR/SLC8A3
GO:0072171	mesonephric tubule morphogenesis	0.0122079	0.00947162	ENSG00000164690/ENSG00000103449/ENSG00000171791/ENSG00000260027/ENSG00000107831/ENSG00000125931	6	SHH/SALL1/BCL2/HOXB7/FGF8/CITED1
GO:0032092	positive regulation of protein binding	0.0122411	0.00949736	ENSG00000148737/ENSG00000110888/ENSG00000105997/ENSG00000116106/ENSG00000262655/ENSG00000114251/ENSG00000154342	7	TCF7L2/CAPRIN2/HOXA3/EPHA4/SPON1/WNT5A/WNT3A
GO:1901863	positive regulation of muscle tissue development	0.0122411	0.00949736	ENSG00000141448/ENSG00000164690/ENSG00000186260/ENSG00000171791/ENSG00000148400/ENSG00000102678/ENSG00000154342	7	GATA6/SHH/MRTFB/BCL2/NOTCH1/FGF9/WNT3A
GO:0032330	regulation of chondrocyte differentiation	0.0122411	0.00949736	ENSG00000162878/ENSG00000168646/ENSG00000172819/ENSG00000151388/ENSG00000104415	5	PKDCC/AXIN2/RARG/ADAMTS12/CCN4
GO:0060401	cytosolic calcium ion transport	0.0122711	0.00952061	ENSG00000018625/ENSG00000198947/ENSG00000171791/ENSG00000149596/ENSG00000150995/ENSG00000183454/ENSG00000183023/ENSG00000134817/ENSG00000100678	9	ATP1A2/DMD/BCL2/JPH2/ITPR1/GRIN2A/SLC8A1/APLNR/SLC8A3
GO:0007599	hemostasis	0.012434	0.00964703	ENSG00000141448/ENSG00000124491/ENSG00000164690/ENSG00000157680/ENSG00000181467/ENSG00000145214/ENSG00000111252/ENSG00000158856/ENSG00000069974/ENSG00000188488/ENSG00000150995/ENSG00000135919/ENSG00000134853/ENSG00000154342	14	GATA6/F13A1/SHH/DGKI/RAP2B/DGKQ/SH2B3/DMTN/RAB27A/SERPINA5/ITPR1/SERPINE2/PDGFRA/WNT3A
GO:0050817	coagulation	0.012434	0.00964703	ENSG00000141448/ENSG00000124491/ENSG00000164690/ENSG00000157680/ENSG00000181467/ENSG00000145214/ENSG00000111252/ENSG00000158856/ENSG00000069974/ENSG00000188488/ENSG00000150995/ENSG00000135919/ENSG00000134853/ENSG00000154342	14	GATA6/F13A1/SHH/DGKI/RAP2B/DGKQ/SH2B3/DMTN/RAB27A/SERPINA5/ITPR1/SERPINE2/PDGFRA/WNT3A
GO:0048546	digestive tract morphogenesis	0.0131086	0.0101705	ENSG00000156574/ENSG00000164690/ENSG00000171791/ENSG00000134853/ENSG00000114251	5	NODAL/SHH/BCL2/PDGFRA/WNT5A
GO:0021602	cranial nerve morphogenesis	0.0137072	0.0106349	ENSG00000105991/ENSG00000173917/ENSG00000105997/ENSG00000128652	4	HOXA1/HOXB2/HOXA3/HOXD3
GO:0021545	cranial nerve development	0.0140172	0.0108754	ENSG00000103449/ENSG00000105991/ENSG00000173917/ENSG00000105997/ENSG00000128652	5	SALL1/HOXA1/HOXB2/HOXA3/HOXD3
GO:0072132	mesenchyme morphogenesis	0.0140172	0.0108754	ENSG00000148400/ENSG00000124216/ENSG00000114251/ENSG00000107831/ENSG00000154342	5	NOTCH1/SNAI1/WNT5A/FGF8/WNT3A
GO:0086001	cardiac muscle cell action potential	0.0140172	0.0108754	ENSG00000018625/ENSG00000046604/ENSG00000198947/ENSG00000162989/ENSG00000183023/ENSG00000120457	6	ATP1A2/DSG2/DMD/KCNJ3/SLC8A1/KCNJ5
GO:0007494	midgut development	0.0140172	0.0108754	ENSG00000173406/ENSG00000114251/ENSG00000128918	3	DAB1/WNT5A/ALDH1A2
GO:0040034	regulation of development, heterochronic	0.0140172	0.0108754	ENSG00000156574/ENSG00000135919/ENSG00000102678	3	NODAL/SERPINE2/FGF9
GO:0060537	muscle tissue development	0.014241	0.011049	ENSG00000141448/ENSG00000164690/ENSG00000186260/ENSG00000046604/ENSG00000171791/ENSG00000138795/ENSG00000148400/ENSG00000149596/ENSG00000134853/ENSG00000102678/ENSG00000114251/ENSG00000107831/ENSG00000183023/ENSG00000154342/ENSG00000128918	15	GATA6/SHH/MRTFB/DSG2/BCL2/LEF1/NOTCH1/JPH2/PDGFRA/FGF9/WNT5A/FGF8/SLC8A1/WNT3A/ALDH1A2
GO:0001570	vasculogenesis	0.0144577	0.0112171	ENSG00000164690/ENSG00000148400/ENSG00000170961/ENSG00000134817/ENSG00000125931/ENSG00000105855	6	SHH/NOTCH1/HAS2/APLNR/CITED1/ITGB8
GO:0035050	embryonic heart tube development	0.0144577	0.0112171	ENSG00000156574/ENSG00000164690/ENSG00000148400/ENSG00000114251/ENSG00000107831/ENSG00000154342	6	NODAL/SHH/NOTCH1/WNT5A/FGF8/WNT3A
GO:0060411	cardiac septum morphogenesis	0.0144577	0.0112171	ENSG00000141448/ENSG00000142871/ENSG00000148400/ENSG00000184347/ENSG00000114251/ENSG00000107831	6	GATA6/CCN1/NOTCH1/SLIT3/WNT5A/FGF8
GO:0030168	platelet activation	0.0144577	0.0112171	ENSG00000157680/ENSG00000181467/ENSG00000145214/ENSG00000111252/ENSG00000158856/ENSG00000150995/ENSG00000135919/ENSG00000134853/ENSG00000154342	9	DGKI/RAP2B/DGKQ/SH2B3/DMTN/ITPR1/SERPINE2/PDGFRA/WNT3A
GO:0010543	regulation of platelet activation	0.0146292	0.0113502	ENSG00000111252/ENSG00000158856/ENSG00000135919/ENSG00000134853	4	SH2B3/DMTN/SERPINE2/PDGFRA
GO:0090287	regulation of cellular response to growth factor stimulus	0.015206	0.0117977	ENSG00000101134/ENSG00000273707/ENSG00000142871/ENSG00000151388/ENSG00000148400/ENSG00000128045/ENSG00000183779/ENSG00000138119/ENSG00000168675/ENSG00000102678/ENSG00000114251/ENSG00000125931	12	DOK5/CDKN1C/CCN1/ADAMTS12/NOTCH1/RASL11B/ZNF703/MYOF/LDLRAD4/FGF9/WNT5A/CITED1
GO:0045742	positive regulation of epidermal growth factor receptor signaling pathway	0.0162336	0.012595	ENSG00000144580/ENSG00000163485/ENSG00000169129/ENSG00000163235	4	CNOT9/ADORA1/AFAP1L2/TGFA
GO:0061311	cell surface receptor signaling pathway involved in heart development	0.0162336	0.012595	ENSG00000148400/ENSG00000124216/ENSG00000114251/ENSG00000154342	4	NOTCH1/SNAI1/WNT5A/WNT3A
GO:1904837	beta-catenin-TCF complex assembly	0.0162336	0.012595	ENSG00000148737/ENSG00000168646/ENSG00000140332/ENSG00000138795	4	TCF7L2/AXIN2/TLE3/LEF1
GO:0002087	regulation of respiratory gaseous exchange by neurological system process	0.0164496	0.0127626	ENSG00000167081/ENSG00000018625/ENSG00000163485	3	PBX3/ATP1A2/ADORA1
GO:0048853	forebrain morphogenesis	0.0164496	0.0127626	ENSG00000114251/ENSG00000107831/ENSG00000187122	3	WNT5A/FGF8/SLIT1
GO:0045785	positive regulation of cell adhesion	0.0170149	0.0132011	ENSG00000156574/ENSG00000164690/ENSG00000146904/ENSG00000107742/ENSG00000160685/ENSG00000077264/ENSG00000152818/ENSG00000145555/ENSG00000103653/ENSG00000166900/ENSG00000142871/ENSG00000158856/ENSG00000020633/ENSG00000170961/ENSG00000114251/ENSG00000154342	16	NODAL/SHH/EPHA1/SPOCK2/ZBTB7B/PAK3/UTRN/MYO10/CSK/STX3/CCN1/DMTN/RUNX3/HAS2/WNT5A/WNT3A
GO:0034332	adherens junction organization	0.0170656	0.0132405	ENSG00000166689/ENSG00000095637/ENSG00000158856/ENSG00000171791/ENSG00000113361/ENSG00000183779/ENSG00000164741/ENSG00000140937	8	PLEKHA7/SORBS1/DMTN/BCL2/CDH6/ZNF703/DLC1/CDH11
GO:0045667	regulation of osteoblast differentiation	0.0170656	0.0132405	ENSG00000160712/ENSG00000168646/ENSG00000142871/ENSG00000148400/ENSG00000105996/ENSG00000162733/ENSG00000125931/ENSG00000104415	8	IL6R/AXIN2/CCN1/NOTCH1/HOXA2/DDR2/CITED1/CCN4
GO:0036037	CD8-positive, alpha-beta T cell activation	0.0176416	0.0136874	ENSG00000160685/ENSG00000182568/ENSG00000171791/ENSG00000020633	4	ZBTB7B/SATB1/BCL2/RUNX3
GO:0060317	cardiac epithelial to mesenchymal transition	0.0176416	0.0136874	ENSG00000148400/ENSG00000124216/ENSG00000170961/ENSG00000107831	4	NOTCH1/SNAI1/HAS2/FGF8
GO:0051480	regulation of cytosolic calcium ion concentration	0.0184126	0.0142856	ENSG00000018625/ENSG00000198947/ENSG00000171791/ENSG00000163485/ENSG00000149596/ENSG00000150995/ENSG00000134853/ENSG00000114251/ENSG00000183454/ENSG00000183023/ENSG00000134817/ENSG00000100678	12	ATP1A2/DMD/BCL2/ADORA1/JPH2/ITPR1/PDGFRA/WNT5A/GRIN2A/SLC8A1/APLNR/SLC8A3
GO:0009798	axis specification	0.0184126	0.0142856	ENSG00000164093/ENSG00000156574/ENSG00000164690/ENSG00000114251/ENSG00000125931/ENSG00000149922	6	PITX2/NODAL/SHH/WNT5A/CITED1/TBX6
GO:0072078	nephron tubule morphogenesis	0.0184126	0.0142856	ENSG00000164690/ENSG00000103449/ENSG00000171791/ENSG00000260027/ENSG00000107831/ENSG00000125931	6	SHH/SALL1/BCL2/HOXB7/FGF8/CITED1
GO:0050678	regulation of epithelial cell proliferation	0.0185395	0.0143841	ENSG00000156574/ENSG00000164690/ENSG00000273707/ENSG00000148737/ENSG00000183779/ENSG00000020633/ENSG00000170961/ENSG00000102678/ENSG00000006606/ENSG00000114251/ENSG00000134817/ENSG00000154342/ENSG00000128918/ENSG00000163235	14	NODAL/SHH/CDKN1C/TCF7L2/ZNF703/RUNX3/HAS2/FGF9/CCL26/WNT5A/APLNR/WNT3A/ALDH1A2/TGFA
GO:1900271	regulation of long-term synaptic potentiation	0.0187676	0.014561	ENSG00000158528/ENSG00000163485/ENSG00000196549/ENSG00000116106/ENSG00000183454	5	PPP1R9A/ADORA1/MME/EPHA4/GRIN2A
GO:0034111	negative regulation of homotypic cell-cell adhesion	0.0189948	0.0147373	ENSG00000111252/ENSG00000135919/ENSG00000183779	3	SH2B3/SERPINE2/ZNF703
GO:0042074	cell migration involved in gastrulation	0.0189948	0.0147373	ENSG00000156574/ENSG00000114251/ENSG00000107831	3	NODAL/WNT5A/FGF8
GO:1901186	positive regulation of ERBB signaling pathway	0.0189948	0.0147373	ENSG00000144580/ENSG00000163485/ENSG00000169129/ENSG00000163235	4	CNOT9/ADORA1/AFAP1L2/TGFA
GO:0032526	response to retinoic acid	0.0189948	0.0147373	ENSG00000121207/ENSG00000172819/ENSG00000111186/ENSG00000105996/ENSG00000114251/ENSG00000154342/ENSG00000128918	7	LRAT/RARG/WNT5B/HOXA2/WNT5A/WNT3A/ALDH1A2
GO:0003279	cardiac septum development	0.0197744	0.0153422	ENSG00000141448/ENSG00000103449/ENSG00000142871/ENSG00000148400/ENSG00000184347/ENSG00000114251/ENSG00000107831	7	GATA6/SALL1/CCN1/NOTCH1/SLIT3/WNT5A/FGF8
GO:0030282	bone mineralization	0.0197744	0.0153422	ENSG00000162878/ENSG00000168646/ENSG00000143367/ENSG00000142871/ENSG00000103056/ENSG00000162733/ENSG00000183023	7	PKDCC/AXIN2/TUFT1/CCN1/SMPD3/DDR2/SLC8A1
GO:0072088	nephron epithelium morphogenesis	0.0198801	0.0154242	ENSG00000164690/ENSG00000103449/ENSG00000171791/ENSG00000260027/ENSG00000107831/ENSG00000125931	6	SHH/SALL1/BCL2/HOXB7/FGF8/CITED1
GO:0051961	negative regulation of nervous system development	0.020048	0.0155544	ENSG00000164690/ENSG00000173406/ENSG00000132359/ENSG00000166450/ENSG00000026025/ENSG00000148400/ENSG00000116106/ENSG00000105996/ENSG00000114251/ENSG00000187122/ENSG00000154342/ENSG00000149922	12	SHH/DAB1/RAP1GAP2/PRTG/VIM/NOTCH1/EPHA4/HOXA2/WNT5A/SLIT1/WNT3A/TBX6
GO:0007368	determination of left/right symmetry	0.0203693	0.0158037	ENSG00000164093/ENSG00000156574/ENSG00000164690/ENSG00000148400/ENSG00000114251/ENSG00000107831/ENSG00000154342	7	PITX2/NODAL/SHH/NOTCH1/WNT5A/FGF8/WNT3A
GO:0006936	muscle contraction	0.0203693	0.0158037	ENSG00000018625/ENSG00000152818/ENSG00000089159/ENSG00000095637/ENSG00000026025/ENSG00000046604/ENSG00000198947/ENSG00000163485/ENSG00000138119/ENSG00000162989/ENSG00000183023/ENSG00000100678/ENSG00000120457	13	ATP1A2/UTRN/PXN/SORBS1/VIM/DSG2/DMD/ADORA1/MYOF/KCNJ3/SLC8A1/SLC8A3/KCNJ5
GO:0021953	central nervous system neuron differentiation	0.0205734	0.0159621	ENSG00000164690/ENSG00000168505/ENSG00000103449/ENSG00000106038/ENSG00000116106/ENSG00000140937/ENSG00000114251/ENSG00000107831/ENSG00000154342	9	SHH/GBX2/SALL1/EVX1/EPHA4/CDH11/WNT5A/FGF8/WNT3A
GO:0086065	cell communication involved in cardiac conduction	0.0206794	0.0160443	ENSG00000018625/ENSG00000046604/ENSG00000162989/ENSG00000183023/ENSG00000120457	5	ATP1A2/DSG2/KCNJ3/SLC8A1/KCNJ5
GO:0072006	nephron development	0.0208121	0.0161473	ENSG00000164690/ENSG00000160712/ENSG00000103449/ENSG00000171791/ENSG00000260027/ENSG00000134853/ENSG00000107831/ENSG00000125931	8	SHH/IL6R/SALL1/BCL2/HOXB7/PDGFRA/FGF8/CITED1
GO:0070252	actin-mediated cell contraction	0.0209729	0.016272	ENSG00000018625/ENSG00000026025/ENSG00000046604/ENSG00000198947/ENSG00000163485/ENSG00000162989/ENSG00000120457	7	ATP1A2/VIM/DSG2/DMD/ADORA1/KCNJ3/KCNJ5
GO:0051056	regulation of small GTPase mediated signal transduction	0.021075	0.0163513	ENSG00000157680/ENSG00000165140/ENSG00000046889/ENSG00000132359/ENSG00000165801/ENSG00000107263/ENSG00000153404/ENSG00000277101/ENSG00000148400/ENSG00000126822/ENSG00000130052/ENSG00000164741/ENSG00000071205	13	DGKI/FBP1/PREX2/RAP1GAP2/ARHGEF40/RAPGEF1/PLEKHG4B/ARHGEF26/NOTCH1/PLEKHG3/STARD8/DLC1/ARHGAP10
GO:0001708	cell fate specification	0.021075	0.0163513	ENSG00000156574/ENSG00000164690/ENSG00000133937/ENSG00000106038/ENSG00000154342/ENSG00000149922	6	NODAL/SHH/GSC/EVX1/WNT3A/TBX6
GO:0042475	odontogenesis of dentin-containing tooth	0.021075	0.0163513	ENSG00000164690/ENSG00000138795/ENSG00000103056/ENSG00000134853/ENSG00000107831/ENSG00000135960	6	SHH/LEF1/SMPD3/PDGFRA/FGF8/EDAR
GO:0061333	renal tubule morphogenesis	0.021075	0.0163513	ENSG00000164690/ENSG00000103449/ENSG00000171791/ENSG00000260027/ENSG00000107831/ENSG00000125931	6	SHH/SALL1/BCL2/HOXB7/FGF8/CITED1
GO:0072028	nephron morphogenesis	0.021075	0.0163513	ENSG00000164690/ENSG00000103449/ENSG00000171791/ENSG00000260027/ENSG00000107831/ENSG00000125931	6	SHH/SALL1/BCL2/HOXB7/FGF8/CITED1
GO:0035265	organ growth	0.021075	0.0163513	ENSG00000141448/ENSG00000164690/ENSG00000172819/ENSG00000171791/ENSG00000148400/ENSG00000103056/ENSG00000162733/ENSG00000102678/ENSG00000107831	9	GATA6/SHH/RARG/BCL2/NOTCH1/SMPD3/DDR2/FGF9/FGF8
GO:0048167	regulation of synaptic plasticity	0.021075	0.0163513	ENSG00000157680/ENSG00000158528/ENSG00000166900/ENSG00000163485/ENSG00000196549/ENSG00000135919/ENSG00000116106/ENSG00000183454/ENSG00000100678	9	DGKI/PPP1R9A/STX3/ADORA1/MME/SERPINE2/EPHA4/GRIN2A/SLC8A3
GO:1902742	apoptotic process involved in development	0.0215434	0.0167146	ENSG00000142871/ENSG00000138795/ENSG00000148400/ENSG00000184347	4	CCN1/LEF1/NOTCH1/SLIT3
GO:0016331	morphogenesis of embryonic epithelium	0.0215434	0.0167146	ENSG00000156574/ENSG00000184254/ENSG00000164690/ENSG00000172819/ENSG00000164741/ENSG00000114251/ENSG00000107831/ENSG00000128918	8	NODAL/ALDH1A3/SHH/RARG/DLC1/WNT5A/FGF8/ALDH1A2
GO:0001890	placenta development	0.0231709	0.0179773	ENSG00000156574/ENSG00000273707/ENSG00000142871/ENSG00000196549/ENSG00000124216/ENSG00000125931/ENSG00000105855/ENSG00000146374	8	NODAL/CDKN1C/CCN1/MME/SNAI1/CITED1/ITGB8/RSPO3
GO:0035264	multicellular organism growth	0.0231709	0.0179773	ENSG00000162878/ENSG00000273707/ENSG00000120756/ENSG00000172819/ENSG00000198832/ENSG00000171791/ENSG00000111077/ENSG00000103056	8	PKDCC/CDKN1C/PLS1/RARG/SELENOM/BCL2/TNS2/SMPD3
GO:0003156	regulation of animal organ formation	0.023359	0.0181233	ENSG00000164690/ENSG00000114251/ENSG00000107831/ENSG00000154342	4	SHH/WNT5A/FGF8/WNT3A
GO:0031076	embryonic camera-type eye development	0.023359	0.0181233	ENSG00000184254/ENSG00000172819/ENSG00000114251/ENSG00000128918	4	ALDH1A3/RARG/WNT5A/ALDH1A2
GO:0042391	regulation of membrane potential	0.023359	0.0181233	ENSG00000157680/ENSG00000018625/ENSG00000145864/ENSG00000158528/ENSG00000046604/ENSG00000198947/ENSG00000171791/ENSG00000163485/ENSG00000198216/ENSG00000188828/ENSG00000162989/ENSG00000183023/ENSG00000100678/ENSG00000120457	14	DGKI/ATP1A2/GABRB2/PPP1R9A/DSG2/DMD/BCL2/ADORA1/CACNA1E/GLRA4/KCNJ3/SLC8A1/SLC8A3/KCNJ5
GO:0007548	sex differentiation	0.023359	0.0181233	ENSG00000141448/ENSG00000164690/ENSG00000180530/ENSG00000144580/ENSG00000103449/ENSG00000171791/ENSG00000184347/ENSG00000134853/ENSG00000102678/ENSG00000114251/ENSG00000107831	11	GATA6/SHH/NRIP1/CNOT9/SALL1/BCL2/SLIT3/PDGFRA/FGF9/WNT5A/FGF8
GO:0002011	morphogenesis of an epithelial sheet	0.0237994	0.018465	ENSG00000130635/ENSG00000142871/ENSG00000148400/ENSG00000173917/ENSG00000114251	5	COL5A1/CCN1/NOTCH1/HOXB2/WNT5A
GO:0003198	epithelial to mesenchymal transition involved in endocardial cushion formation	0.0239328	0.0185685	ENSG00000148400/ENSG00000124216/ENSG00000107831	3	NOTCH1/SNAI1/FGF8
GO:0044065	regulation of respiratory system process	0.0239328	0.0185685	ENSG00000167081/ENSG00000018625/ENSG00000163485	3	PBX3/ATP1A2/ADORA1
GO:1990573	potassium ion import across plasma membrane	0.0239328	0.0185685	ENSG00000018625/ENSG00000162989/ENSG00000120457	3	ATP1A2/KCNJ3/KCNJ5
GO:1904375	regulation of protein localization to cell periphery	0.0242415	0.018808	ENSG00000162878/ENSG00000175497/ENSG00000120756/ENSG00000103653/ENSG00000166900/ENSG00000095637/ENSG00000154342	7	PKDCC/DPP10/PLS1/CSK/STX3/SORBS1/WNT3A
GO:0010769	regulation of cell morphogenesis involved in differentiation	0.0246599	0.0191326	ENSG00000077264/ENSG00000173406/ENSG00000158528/ENSG00000167178/ENSG00000110888/ENSG00000169439/ENSG00000158856/ENSG00000116106/ENSG00000170961/ENSG00000114251/ENSG00000154342	11	PAK3/DAB1/PPP1R9A/ISLR2/CAPRIN2/SDC2/DMTN/EPHA4/HAS2/WNT5A/WNT3A
GO:0021537	telencephalon development	0.0246599	0.0191326	ENSG00000184254/ENSG00000164690/ENSG00000128610/ENSG00000173406/ENSG00000103449/ENSG00000165300/ENSG00000114251/ENSG00000107831/ENSG00000183023/ENSG00000154342/ENSG00000100678	11	ALDH1A3/SHH/FEZF1/DAB1/SALL1/SLITRK5/WNT5A/FGF8/SLC8A1/WNT3A/SLC8A3
GO:0009880	embryonic pattern specification	0.0247957	0.019238	ENSG00000156574/ENSG00000164690/ENSG00000114251/ENSG00000125931/ENSG00000149922	5	NODAL/SHH/WNT5A/CITED1/TBX6
GO:0001892	embryonic placenta development	0.0257854	0.0200058	ENSG00000156574/ENSG00000273707/ENSG00000142871/ENSG00000124216/ENSG00000125931/ENSG00000146374	6	NODAL/CDKN1C/CCN1/SNAI1/CITED1/RSPO3
GO:1903078	positive regulation of protein localization to plasma membrane	0.0263999	0.0204826	ENSG00000175497/ENSG00000120756/ENSG00000166900/ENSG00000095637/ENSG00000154342	5	DPP10/PLS1/STX3/SORBS1/WNT3A
GO:0071542	dopaminergic neuron differentiation	0.0271731	0.0210825	ENSG00000164690/ENSG00000114251/ENSG00000107831/ENSG00000154342	4	SHH/WNT5A/FGF8/WNT3A
GO:0010107	potassium ion import	0.0271844	0.0210912	ENSG00000018625/ENSG00000162989/ENSG00000120457	3	ATP1A2/KCNJ3/KCNJ5
GO:0036342	post-anal tail morphogenesis	0.0271844	0.0210912	ENSG00000114251/ENSG00000154342/ENSG00000179111	3	WNT5A/WNT3A/HES7
GO:0090330	regulation of platelet aggregation	0.0271844	0.0210912	ENSG00000111252/ENSG00000158856/ENSG00000135919	3	SH2B3/DMTN/SERPINE2
GO:0033138	positive regulation of peptidyl-serine phosphorylation	0.0279251	0.021666	ENSG00000110888/ENSG00000144580/ENSG00000171791/ENSG00000009694/ENSG00000114251/ENSG00000154342	6	CAPRIN2/CNOT9/BCL2/TENM1/WNT5A/WNT3A
GO:0001667	ameboidal-type cell migration	0.0279251	0.021666	ENSG00000164093/ENSG00000156574/ENSG00000164690/ENSG00000077264/ENSG00000168505/ENSG00000131016/ENSG00000089159/ENSG00000158856/ENSG00000148400/ENSG00000086570/ENSG00000170961/ENSG00000162733/ENSG00000114251/ENSG00000107831/ENSG00000183023	15	PITX2/NODAL/SHH/PAK3/GBX2/AKAP12/PXN/DMTN/NOTCH1/FAT2/HAS2/DDR2/WNT5A/FGF8/SLC8A1
GO:0006816	calcium ion transport	0.0279251	0.021666	ENSG00000018625/ENSG00000198947/ENSG00000171791/ENSG00000149596/ENSG00000124942/ENSG00000150995/ENSG00000105997/ENSG00000100346/ENSG00000278232/ENSG00000198216/ENSG00000183454/ENSG00000183023/ENSG00000134817/ENSG00000154342/ENSG00000100678	15	ATP1A2/DMD/BCL2/JPH2/AHNAK/ITPR1/HOXA3/CACNA1I/CRHR1/CACNA1E/GRIN2A/SLC8A1/APLNR/WNT3A/SLC8A3
GO:0022604	regulation of cell morphogenesis	0.0283896	0.0220263	ENSG00000077264/ENSG00000173406/ENSG00000158528/ENSG00000167178/ENSG00000110888/ENSG00000082397/ENSG00000145555/ENSG00000130559/ENSG00000169439/ENSG00000158856/ENSG00000116106/ENSG00000170961/ENSG00000164741/ENSG00000114251/ENSG00000154342	15	PAK3/DAB1/PPP1R9A/ISLR2/CAPRIN2/EPB41L3/MYO10/CAMSAP1/SDC2/DMTN/EPHA4/HAS2/DLC1/WNT5A/WNT3A
GO:0022404	molting cycle process	0.0289538	0.0224641	ENSG00000164690/ENSG00000144749/ENSG00000171791/ENSG00000124216/ENSG00000114251/ENSG00000135960	6	SHH/LRIG1/BCL2/SNAI1/WNT5A/EDAR
GO:0022405	hair cycle process	0.0289538	0.0224641	ENSG00000164690/ENSG00000144749/ENSG00000171791/ENSG00000124216/ENSG00000114251/ENSG00000135960	6	SHH/LRIG1/BCL2/SNAI1/WNT5A/EDAR
GO:2000027	regulation of animal organ morphogenesis	0.0290114	0.0225088	ENSG00000164690/ENSG00000189120/ENSG00000171791/ENSG00000148400/ENSG00000171843/ENSG00000260027/ENSG00000114251/ENSG00000107831/ENSG00000154342/ENSG00000125931/ENSG00000146374	11	SHH/SP6/BCL2/NOTCH1/MLLT3/HOXB7/WNT5A/FGF8/WNT3A/CITED1/RSPO3
GO:0031214	biomineral tissue development	0.0293858	0.0227992	ENSG00000162878/ENSG00000168646/ENSG00000143367/ENSG00000142871/ENSG00000148400/ENSG00000103056/ENSG00000162733/ENSG00000183023	8	PKDCC/AXIN2/TUFT1/CCN1/NOTCH1/SMPD3/DDR2/SLC8A1
GO:0050731	positive regulation of peptidyl-tyrosine phosphorylation	0.0298769	0.0231803	ENSG00000160712/ENSG00000167191/ENSG00000145214/ENSG00000163485/ENSG00000169129/ENSG00000116106/ENSG00000107831/ENSG00000154342/ENSG00000163235	9	IL6R/GPRC5B/DGKQ/ADORA1/AFAP1L2/EPHA4/FGF8/WNT3A/TGFA
GO:0007379	segment specification	0.0302948	0.0235045	ENSG00000171843/ENSG00000105996/ENSG00000151379	3	MLLT3/HOXA2/MSGN1
GO:0010544	negative regulation of platelet activation	0.0302948	0.0235045	ENSG00000111252/ENSG00000135919/ENSG00000134853	3	SH2B3/SERPINE2/PDGFRA
GO:1900272	negative regulation of long-term synaptic potentiation	0.0302948	0.0235045	ENSG00000158528/ENSG00000163485/ENSG00000116106	3	PPP1R9A/ADORA1/EPHA4
GO:0003012	muscle system process	0.0302948	0.0235045	ENSG00000141448/ENSG00000018625/ENSG00000152818/ENSG00000089159/ENSG00000095637/ENSG00000026025/ENSG00000046604/ENSG00000198947/ENSG00000148400/ENSG00000163485/ENSG00000138119/ENSG00000162989/ENSG00000183023/ENSG00000100678/ENSG00000120457	15	GATA6/ATP1A2/UTRN/PXN/SORBS1/VIM/DSG2/DMD/NOTCH1/ADORA1/MYOF/KCNJ3/SLC8A1/SLC8A3/KCNJ5
GO:0050768	negative regulation of neurogenesis	0.030569	0.0237173	ENSG00000164690/ENSG00000173406/ENSG00000132359/ENSG00000166450/ENSG00000026025/ENSG00000148400/ENSG00000116106/ENSG00000105996/ENSG00000114251/ENSG00000154342/ENSG00000149922	11	SHH/DAB1/RAP1GAP2/PRTG/VIM/NOTCH1/EPHA4/HOXA2/WNT5A/WNT3A/TBX6
GO:0046578	regulation of Ras protein signal transduction	0.0305927	0.0237356	ENSG00000157680/ENSG00000165140/ENSG00000046889/ENSG00000165801/ENSG00000107263/ENSG00000153404/ENSG00000277101/ENSG00000148400/ENSG00000126822/ENSG00000164741	10	DGKI/FBP1/PREX2/ARHGEF40/RAPGEF1/PLEKHG4B/ARHGEF26/NOTCH1/PLEKHG3/DLC1
GO:0051591	response to cAMP	0.0308673	0.0239487	ENSG00000107263/ENSG00000145214/ENSG00000158856/ENSG00000183023/ENSG00000125931/ENSG00000100678	6	RAPGEF1/DGKQ/DMTN/SLC8A1/CITED1/SLC8A3
GO:0060348	bone development	0.030878	0.023957	ENSG00000164093/ENSG00000168646/ENSG00000172819/ENSG00000111252/ENSG00000113722/ENSG00000103056/ENSG00000170961/ENSG00000107831/ENSG00000104415	9	PITX2/AXIN2/RARG/SH2B3/CDX1/SMPD3/HAS2/FGF8/CCN4
GO:0021872	forebrain generation of neurons	0.0316049	0.024521	ENSG00000168505/ENSG00000103449/ENSG00000114251/ENSG00000107831/ENSG00000154342	5	GBX2/SALL1/WNT5A/FGF8/WNT3A
GO:0030901	midbrain development	0.032117	0.0249183	ENSG00000164690/ENSG00000166165/ENSG00000123560/ENSG00000102678/ENSG00000114251/ENSG00000154342	6	SHH/CKB/PLP1/FGF9/WNT5A/WNT3A
GO:0061138	morphogenesis of a branching epithelium	0.0325622	0.0252637	ENSG00000164690/ENSG00000168505/ENSG00000103449/ENSG00000171791/ENSG00000260027/ENSG00000114251/ENSG00000107831/ENSG00000125931/ENSG00000146374	9	SHH/GBX2/SALL1/BCL2/HOXB7/WNT5A/FGF8/CITED1/RSPO3
GO:0098739	import across plasma membrane	0.0331353	0.0257083	ENSG00000018625/ENSG00000162989/ENSG00000183023/ENSG00000100678/ENSG00000120457	5	ATP1A2/KCNJ3/SLC8A1/SLC8A3/KCNJ5
GO:0045665	negative regulation of neuron differentiation	0.0331353	0.0257083	ENSG00000164690/ENSG00000173406/ENSG00000132359/ENSG00000026025/ENSG00000116106/ENSG00000105996/ENSG00000114251/ENSG00000154342/ENSG00000149922	9	SHH/DAB1/RAP1GAP2/VIM/EPHA4/HOXA2/WNT5A/WNT3A/TBX6
GO:0010522	regulation of calcium ion transport into cytosol	0.0331353	0.0257083	ENSG00000018625/ENSG00000198947/ENSG00000171791/ENSG00000149596/ENSG00000183023/ENSG00000134817	6	ATP1A2/DMD/BCL2/JPH2/SLC8A1/APLNR
GO:0046632	alpha-beta T cell differentiation	0.0331353	0.0257083	ENSG00000164690/ENSG00000160685/ENSG00000182568/ENSG00000171791/ENSG00000138795/ENSG00000020633	6	SHH/ZBTB7B/SATB1/BCL2/LEF1/RUNX3
GO:2000380	regulation of mesoderm development	0.033543	0.0260246	ENSG00000156574/ENSG00000164690/ENSG00000154342	3	NODAL/SHH/WNT3A
GO:0071559	response to transforming growth factor beta	0.0338688	0.0262774	ENSG00000156574/ENSG00000273707/ENSG00000140564/ENSG00000089159/ENSG00000128045/ENSG00000183779/ENSG00000020633/ENSG00000168675/ENSG00000114251/ENSG00000125931	10	NODAL/CDKN1C/FURIN/PXN/RASL11B/ZNF703/RUNX3/LDLRAD4/WNT5A/CITED1
GO:0022612	gland morphogenesis	0.0339161	0.0263141	ENSG00000164690/ENSG00000172819/ENSG00000171791/ENSG00000114251/ENSG00000107831/ENSG00000154342/ENSG00000135960	7	SHH/RARG/BCL2/WNT5A/FGF8/WNT3A/EDAR
GO:0006942	regulation of striated muscle contraction	0.0340684	0.0264323	ENSG00000018625/ENSG00000046604/ENSG00000198947/ENSG00000163485/ENSG00000183023/ENSG00000100678	6	ATP1A2/DSG2/DMD/ADORA1/SLC8A1/SLC8A3
GO:0071300	cellular response to retinoic acid	0.0340684	0.0264323	ENSG00000111186/ENSG00000105996/ENSG00000114251/ENSG00000154342/ENSG00000128918	5	WNT5B/HOXA2/WNT5A/WNT3A/ALDH1A2
GO:0007517	muscle organ development	0.0340684	0.0264323	ENSG00000141448/ENSG00000164690/ENSG00000133937/ENSG00000152818/ENSG00000186260/ENSG00000198947/ENSG00000171791/ENSG00000138795/ENSG00000148400/ENSG00000149596/ENSG00000102678/ENSG00000114251/ENSG00000107831/ENSG00000154342	14	GATA6/SHH/GSC/UTRN/MRTFB/DMD/BCL2/LEF1/NOTCH1/JPH2/FGF9/WNT5A/FGF8/WNT3A
GO:0048710	regulation of astrocyte differentiation	0.0340684	0.0264323	ENSG00000173406/ENSG00000148400/ENSG00000135919/ENSG00000116106	4	DAB1/NOTCH1/SERPINE2/EPHA4
GO:0051489	regulation of filopodium assembly	0.0340684	0.0264323	ENSG00000158528/ENSG00000145555/ENSG00000158856/ENSG00000009694	4	PPP1R9A/MYO10/DMTN/TENM1
GO:0010810	regulation of cell-substrate adhesion	0.0340684	0.0264323	ENSG00000146904/ENSG00000107742/ENSG00000152818/ENSG00000142871/ENSG00000158856/ENSG00000171791/ENSG00000148400/ENSG00000170961/ENSG00000164741	9	EPHA1/SPOCK2/UTRN/CCN1/DMTN/BCL2/NOTCH1/HAS2/DLC1
GO:0001656	metanephros development	0.0352434	0.0273439	ENSG00000164690/ENSG00000103449/ENSG00000171791/ENSG00000134853/ENSG00000107831/ENSG00000125931	6	SHH/SALL1/BCL2/PDGFRA/FGF8/CITED1
GO:0010975	regulation of neuron projection development	0.0352977	0.0273861	ENSG00000077264/ENSG00000124507/ENSG00000173406/ENSG00000132359/ENSG00000158528/ENSG00000167178/ENSG00000110888/ENSG00000107263/ENSG00000026025/ENSG00000169439/ENSG00000182158/ENSG00000116106/ENSG00000114251/ENSG00000154342/ENSG00000149922	15	PAK3/PACSIN1/DAB1/RAP1GAP2/PPP1R9A/ISLR2/CAPRIN2/RAPGEF1/VIM/SDC2/CREB3L2/EPHA4/WNT5A/WNT3A/TBX6
GO:0060048	cardiac muscle contraction	0.0355731	0.0275997	ENSG00000018625/ENSG00000046604/ENSG00000198947/ENSG00000163485/ENSG00000162989/ENSG00000183023/ENSG00000120457	7	ATP1A2/DSG2/DMD/ADORA1/KCNJ3/SLC8A1/KCNJ5
GO:1904377	positive regulation of protein localization to cell periphery	0.0355731	0.0275997	ENSG00000175497/ENSG00000120756/ENSG00000166900/ENSG00000095637/ENSG00000154342	5	DPP10/PLS1/STX3/SORBS1/WNT3A
GO:0042445	hormone metabolic process	0.036241	0.0281179	ENSG00000184254/ENSG00000164690/ENSG00000121207/ENSG00000148737/ENSG00000140564/ENSG00000145214/ENSG00000198832/ENSG00000196549/ENSG00000134853/ENSG00000128918	10	ALDH1A3/SHH/LRAT/TCF7L2/FURIN/DGKQ/SELENOM/MME/PDGFRA/ALDH1A2
GO:0072080	nephron tubule development	0.0363335	0.0281897	ENSG00000164690/ENSG00000103449/ENSG00000171791/ENSG00000260027/ENSG00000107831/ENSG00000125931	6	SHH/SALL1/BCL2/HOXB7/FGF8/CITED1
GO:0030048	actin filament-based movement	0.0364374	0.0282703	ENSG00000018625/ENSG00000026025/ENSG00000046604/ENSG00000198947/ENSG00000163485/ENSG00000162989/ENSG00000120457	7	ATP1A2/VIM/DSG2/DMD/ADORA1/KCNJ3/KCNJ5
GO:0002320	lymphoid progenitor cell differentiation	0.0364374	0.0282703	ENSG00000164690/ENSG00000171791/ENSG00000148400	3	SHH/BCL2/NOTCH1
GO:0048754	branching morphogenesis of an epithelial tube	0.0368752	0.02861	ENSG00000164690/ENSG00000168505/ENSG00000103449/ENSG00000171791/ENSG00000260027/ENSG00000114251/ENSG00000107831/ENSG00000125931	8	SHH/GBX2/SALL1/BCL2/HOXB7/WNT5A/FGF8/CITED1
GO:0014033	neural crest cell differentiation	0.0368752	0.02861	ENSG00000164093/ENSG00000164690/ENSG00000133937/ENSG00000168505/ENSG00000128918	5	PITX2/SHH/GSC/GBX2/ALDH1A2
GO:0086003	cardiac muscle cell contraction	0.0368752	0.02861	ENSG00000018625/ENSG00000046604/ENSG00000163485/ENSG00000162989/ENSG00000120457	5	ATP1A2/DSG2/ADORA1/KCNJ3/KCNJ5
GO:0060993	kidney morphogenesis	0.0373107	0.0289478	ENSG00000164690/ENSG00000103449/ENSG00000171791/ENSG00000260027/ENSG00000107831/ENSG00000125931	6	SHH/SALL1/BCL2/HOXB7/FGF8/CITED1
GO:0050804	modulation of chemical synaptic transmission	0.0373629	0.0289883	ENSG00000157680/ENSG00000018625/ENSG00000158528/ENSG00000131016/ENSG00000166900/ENSG00000188803/ENSG00000163485/ENSG00000196549/ENSG00000135919/ENSG00000116106/ENSG00000140937/ENSG00000183454/ENSG00000154342/ENSG00000100678	14	DGKI/ATP1A2/PPP1R9A/AKAP12/STX3/SHISA6/ADORA1/MME/SERPINE2/EPHA4/CDH11/GRIN2A/WNT3A/SLC8A3
GO:0006941	striated muscle contraction	0.0376119	0.0291816	ENSG00000018625/ENSG00000046604/ENSG00000198947/ENSG00000163485/ENSG00000162989/ENSG00000183023/ENSG00000100678/ENSG00000120457	8	ATP1A2/DSG2/DMD/ADORA1/KCNJ3/SLC8A1/SLC8A3/KCNJ5
GO:0099177	regulation of trans-synaptic signaling	0.0378571	0.0293718	ENSG00000157680/ENSG00000018625/ENSG00000158528/ENSG00000131016/ENSG00000166900/ENSG00000188803/ENSG00000163485/ENSG00000196549/ENSG00000135919/ENSG00000116106/ENSG00000140937/ENSG00000183454/ENSG00000154342/ENSG00000100678	14	DGKI/ATP1A2/PPP1R9A/AKAP12/STX3/SHISA6/ADORA1/MME/SERPINE2/EPHA4/CDH11/GRIN2A/WNT3A/SLC8A3
GO:0061326	renal tubule development	0.0385187	0.0298851	ENSG00000164690/ENSG00000103449/ENSG00000171791/ENSG00000260027/ENSG00000107831/ENSG00000125931	6	SHH/SALL1/BCL2/HOXB7/FGF8/CITED1
GO:0050806	positive regulation of synaptic transmission	0.0385187	0.0298851	ENSG00000158528/ENSG00000166900/ENSG00000163485/ENSG00000196549/ENSG00000135919/ENSG00000116106/ENSG00000183454/ENSG00000100678	8	PPP1R9A/STX3/ADORA1/MME/SERPINE2/EPHA4/GRIN2A/SLC8A3
GO:0060078	regulation of postsynaptic membrane potential	0.0396008	0.0307246	ENSG00000157680/ENSG00000145864/ENSG00000158528/ENSG00000163485/ENSG00000188828/ENSG00000183023/ENSG00000100678	7	DGKI/GABRB2/PPP1R9A/ADORA1/GLRA4/SLC8A1/SLC8A3
GO:0001657	ureteric bud development	0.0398431	0.0309127	ENSG00000164690/ENSG00000103449/ENSG00000171791/ENSG00000260027/ENSG00000107831/ENSG00000125931	6	SHH/SALL1/BCL2/HOXB7/FGF8/CITED1
GO:0032331	negative regulation of chondrocyte differentiation	0.0398431	0.0309127	ENSG00000172819/ENSG00000151388/ENSG00000104415	3	RARG/ADAMTS12/CCN4
GO:2000050	regulation of non-canonical Wnt signaling pathway	0.0398431	0.0309127	ENSG00000171843/ENSG00000114251/ENSG00000146374	3	MLLT3/WNT5A/RSPO3
GO:0010470	regulation of gastrulation	0.0403285	0.0312893	ENSG00000156574/ENSG00000130635/ENSG00000204262/ENSG00000154342	4	NODAL/COL5A1/COL5A2/WNT3A
GO:0110111	negative regulation of animal organ morphogenesis	0.0403285	0.0312893	ENSG00000171791/ENSG00000148400/ENSG00000114251/ENSG00000125931	4	BCL2/NOTCH1/WNT5A/CITED1
GO:0010977	negative regulation of neuron projection development	0.0403285	0.0312893	ENSG00000173406/ENSG00000132359/ENSG00000026025/ENSG00000116106/ENSG00000114251/ENSG00000154342/ENSG00000149922	7	DAB1/RAP1GAP2/VIM/EPHA4/WNT5A/WNT3A/TBX6
GO:0008406	gonad development	0.0407957	0.0316517	ENSG00000141448/ENSG00000180530/ENSG00000103449/ENSG00000171791/ENSG00000184347/ENSG00000134853/ENSG00000102678/ENSG00000114251/ENSG00000107831	9	GATA6/NRIP1/SALL1/BCL2/SLIT3/PDGFRA/FGF9/WNT5A/FGF8
GO:0072163	mesonephric epithelium development	0.0407957	0.0316517	ENSG00000164690/ENSG00000103449/ENSG00000171791/ENSG00000260027/ENSG00000107831/ENSG00000125931	6	SHH/SALL1/BCL2/HOXB7/FGF8/CITED1
GO:0072164	mesonephric tubule development	0.0407957	0.0316517	ENSG00000164690/ENSG00000103449/ENSG00000171791/ENSG00000260027/ENSG00000107831/ENSG00000125931	6	SHH/SALL1/BCL2/HOXB7/FGF8/CITED1
GO:0050673	epithelial cell proliferation	0.0422416	0.0327736	ENSG00000156574/ENSG00000164690/ENSG00000273707/ENSG00000148737/ENSG00000183779/ENSG00000020633/ENSG00000170961/ENSG00000102678/ENSG00000006606/ENSG00000114251/ENSG00000134817/ENSG00000154342/ENSG00000128918/ENSG00000163235	14	NODAL/SHH/CDKN1C/TCF7L2/ZNF703/RUNX3/HAS2/FGF9/CCL26/WNT5A/APLNR/WNT3A/ALDH1A2/TGFA
GO:0018209	peptidyl-serine modification	0.0422416	0.0327736	ENSG00000107742/ENSG00000110888/ENSG00000144580/ENSG00000145214/ENSG00000198947/ENSG00000158856/ENSG00000171791/ENSG00000009694/ENSG00000114251/ENSG00000154342	10	SPOCK2/CAPRIN2/CNOT9/DGKQ/DMD/DMTN/BCL2/TENM1/WNT5A/WNT3A
GO:0007162	negative regulation of cell adhesion	0.0422416	0.0327736	ENSG00000164690/ENSG00000160685/ENSG00000173406/ENSG00000111252/ENSG00000158856/ENSG00000120708/ENSG00000148400/ENSG00000135919/ENSG00000183779/ENSG00000020633/ENSG00000164741	11	SHH/ZBTB7B/DAB1/SH2B3/DMTN/TGFBI/NOTCH1/SERPINE2/ZNF703/RUNX3/DLC1
GO:0002067	glandular epithelial cell differentiation	0.0422416	0.0327736	ENSG00000141448/ENSG00000172819/ENSG00000114251/ENSG00000107831	4	GATA6/RARG/WNT5A/FGF8
GO:0048701	embryonic cranial skeleton morphogenesis	0.0422416	0.0327736	ENSG00000156574/ENSG00000105991/ENSG00000105996/ENSG00000134853	4	NODAL/HOXA1/HOXA2/PDGFRA
GO:0048813	dendrite morphogenesis	0.0422416	0.0327736	ENSG00000077264/ENSG00000046889/ENSG00000158528/ENSG00000110888/ENSG00000169439/ENSG00000165300/ENSG00000116106	7	PAK3/PREX2/PPP1R9A/CAPRIN2/SDC2/SLITRK5/EPHA4
GO:0001763	morphogenesis of a branching structure	0.0422416	0.0327736	ENSG00000164690/ENSG00000168505/ENSG00000103449/ENSG00000171791/ENSG00000260027/ENSG00000114251/ENSG00000107831/ENSG00000125931/ENSG00000146374	9	SHH/GBX2/SALL1/BCL2/HOXB7/WNT5A/FGF8/CITED1/RSPO3
GO:0002028	regulation of sodium ion transport	0.0429261	0.0333046	ENSG00000018625/ENSG00000152818/ENSG00000198947/ENSG00000135919/ENSG00000183023	5	ATP1A2/UTRN/DMD/SERPINE2/SLC8A1
GO:0001573	ganglioside metabolic process	0.0429261	0.0333046	ENSG00000177511/ENSG00000148488/ENSG00000105855	3	ST8SIA3/ST8SIA6/ITGB8
GO:0030318	melanocyte differentiation	0.0429261	0.0333046	ENSG00000171791/ENSG00000069974/ENSG00000125931	3	BCL2/RAB27A/CITED1
GO:0007204	positive regulation of cytosolic calcium ion concentration	0.0446011	0.0346042	ENSG00000018625/ENSG00000198947/ENSG00000171791/ENSG00000149596/ENSG00000150995/ENSG00000134853/ENSG00000183454/ENSG00000183023/ENSG00000134817/ENSG00000100678	10	ATP1A2/DMD/BCL2/JPH2/ITPR1/PDGFRA/GRIN2A/SLC8A1/APLNR/SLC8A3
GO:0030534	adult behavior	0.0446011	0.0346042	ENSG00000167081/ENSG00000136367/ENSG00000046889/ENSG00000018625/ENSG00000173406/ENSG00000165300/ENSG00000116106	7	PBX3/ZFHX2/PREX2/ATP1A2/DAB1/SLITRK5/EPHA4
GO:0055078	sodium ion homeostasis	0.0446011	0.0346042	ENSG00000111319/ENSG00000018625/ENSG00000163485/ENSG00000183023	4	SCNN1A/ATP1A2/ADORA1/SLC8A1
GO:0099175	regulation of postsynapse organization	0.0446509	0.0346428	ENSG00000077264/ENSG00000158528/ENSG00000110888/ENSG00000188803/ENSG00000116106/ENSG00000114251	6	PAK3/PPP1R9A/CAPRIN2/SHISA6/EPHA4/WNT5A
GO:0051783	regulation of nuclear division	0.0451426	0.0350243	ENSG00000136014/ENSG00000273707/ENSG00000118007/ENSG00000178295/ENSG00000103056/ENSG00000114251/ENSG00000107831/ENSG00000163235	8	USP44/CDKN1C/STAG1/GEN1/SMPD3/WNT5A/FGF8/TGFA
GO:0045137	development of primary sexual characteristics	0.0451426	0.0350243	ENSG00000141448/ENSG00000180530/ENSG00000103449/ENSG00000171791/ENSG00000184347/ENSG00000134853/ENSG00000102678/ENSG00000114251/ENSG00000107831	9	GATA6/NRIP1/SALL1/BCL2/SLIT3/PDGFRA/FGF9/WNT5A/FGF8
GO:0032970	regulation of actin filament-based process	0.0451426	0.0350243	ENSG00000146904/ENSG00000077264/ENSG00000018625/ENSG00000158528/ENSG00000089159/ENSG00000046604/ENSG00000158856/ENSG00000163485/ENSG00000009694/ENSG00000164741/ENSG00000134853/ENSG00000006606	12	EPHA1/PAK3/ATP1A2/PPP1R9A/PXN/DSG2/DMTN/ADORA1/TENM1/DLC1/PDGFRA/CCL26
GO:0001823	mesonephros development	0.0451426	0.0350243	ENSG00000164690/ENSG00000103449/ENSG00000171791/ENSG00000260027/ENSG00000107831/ENSG00000125931	6	SHH/SALL1/BCL2/HOXB7/FGF8/CITED1
GO:0008344	adult locomotory behavior	0.0451426	0.0350243	ENSG00000167081/ENSG00000046889/ENSG00000018625/ENSG00000173406/ENSG00000116106	5	PBX3/PREX2/ATP1A2/DAB1/EPHA4
GO:1900006	positive regulation of dendrite development	0.0451426	0.0350243	ENSG00000077264/ENSG00000124507/ENSG00000158528/ENSG00000110888/ENSG00000116106	5	PAK3/PACSIN1/PPP1R9A/CAPRIN2/EPHA4
GO:0010770	positive regulation of cell morphogenesis involved in differentiation	0.0451426	0.0350243	ENSG00000077264/ENSG00000167178/ENSG00000110888/ENSG00000158856/ENSG00000116106/ENSG00000170961/ENSG00000154342	7	PAK3/ISLR2/CAPRIN2/DMTN/EPHA4/HAS2/WNT3A
GO:0003272	endocardial cushion formation	0.0451426	0.0350243	ENSG00000148400/ENSG00000124216/ENSG00000107831	3	NOTCH1/SNAI1/FGF8
GO:0010002	cardioblast differentiation	0.0451426	0.0350243	ENSG00000141448/ENSG00000148400/ENSG00000154342	3	GATA6/NOTCH1/WNT3A
GO:0021904	dorsal/ventral neural tube patterning	0.0451426	0.0350243	ENSG00000164690/ENSG00000133937/ENSG00000154342	3	SHH/GSC/WNT3A
GO:0030539	male genitalia development	0.0451426	0.0350243	ENSG00000164690/ENSG00000134853/ENSG00000107831	3	SHH/PDGFRA/FGF8
GO:0031069	hair follicle morphogenesis	0.0451426	0.0350243	ENSG00000164690/ENSG00000171791/ENSG00000124216	3	SHH/BCL2/SNAI1
GO:0042481	regulation of odontogenesis	0.0451426	0.0350243	ENSG00000164690/ENSG00000189120/ENSG00000107831	3	SHH/SP6/FGF8
GO:0043576	regulation of respiratory gaseous exchange	0.0451426	0.0350243	ENSG00000167081/ENSG00000018625/ENSG00000163485	3	PBX3/ATP1A2/ADORA1
GO:0046639	negative regulation of alpha-beta T cell differentiation	0.0451426	0.0350243	ENSG00000164690/ENSG00000160685/ENSG00000020633	3	SHH/ZBTB7B/RUNX3
GO:0060571	morphogenesis of an epithelial fold	0.0451426	0.0350243	ENSG00000156574/ENSG00000164690/ENSG00000114251	3	NODAL/SHH/WNT5A
GO:0009948	anterior/posterior axis specification	0.0451426	0.0350243	ENSG00000156574/ENSG00000164690/ENSG00000114251/ENSG00000149922	4	NODAL/SHH/WNT5A/TBX6
GO:0048806	genitalia development	0.0451426	0.0350243	ENSG00000164690/ENSG00000134853/ENSG00000114251/ENSG00000107831	4	SHH/PDGFRA/WNT5A/FGF8
GO:0061001	regulation of dendritic spine morphogenesis	0.0451426	0.0350243	ENSG00000077264/ENSG00000158528/ENSG00000110888/ENSG00000116106	4	PAK3/PPP1R9A/CAPRIN2/EPHA4
GO:0010959	regulation of metal ion transport	0.0455322	0.0353266	ENSG00000018625/ENSG00000152818/ENSG00000175497/ENSG00000198947/ENSG00000171791/ENSG00000163485/ENSG00000149596/ENSG00000124942/ENSG00000105997/ENSG00000135919/ENSG00000278232/ENSG00000183023/ENSG00000134817	13	ATP1A2/UTRN/DPP10/DMD/BCL2/ADORA1/JPH2/AHNAK/HOXA3/SERPINE2/CRHR1/SLC8A1/APLNR
GO:0003281	ventricular septum development	0.0466232	0.0361731	ENSG00000103449/ENSG00000142871/ENSG00000148400/ENSG00000184347/ENSG00000114251	5	SALL1/CCN1/NOTCH1/SLIT3/WNT5A
GO:0010811	positive regulation of cell-substrate adhesion	0.0475406	0.0368848	ENSG00000146904/ENSG00000107742/ENSG00000152818/ENSG00000142871/ENSG00000158856/ENSG00000170961	6	EPHA1/SPOCK2/UTRN/CCN1/DMTN/HAS2
GO:0061337	cardiac conduction	0.0477202	0.0370242	ENSG00000018625/ENSG00000046604/ENSG00000150995/ENSG00000162989/ENSG00000183023/ENSG00000100678/ENSG00000120457	7	ATP1A2/DSG2/ITPR1/KCNJ3/SLC8A1/SLC8A3/KCNJ5
GO:0072073	kidney epithelium development	0.0477202	0.0370242	ENSG00000164690/ENSG00000103449/ENSG00000171791/ENSG00000260027/ENSG00000116106/ENSG00000107831/ENSG00000125931	7	SHH/SALL1/BCL2/HOXB7/EPHA4/FGF8/CITED1
GO:0060395	SMAD protein signal transduction	0.0477202	0.0370242	ENSG00000156574/ENSG00000157110/ENSG00000026025/ENSG00000125931	4	NODAL/RBPMS/VIM/CITED1
GO:0043393	regulation of protein binding	0.0477202	0.0370242	ENSG00000148737/ENSG00000110888/ENSG00000171791/ENSG00000138795/ENSG00000105997/ENSG00000116106/ENSG00000262655/ENSG00000114251/ENSG00000154342	9	TCF7L2/CAPRIN2/BCL2/LEF1/HOXA3/EPHA4/SPON1/WNT5A/WNT3A
GO:0060560	developmental growth involved in morphogenesis	0.0477202	0.0370242	ENSG00000164690/ENSG00000167178/ENSG00000103449/ENSG00000172819/ENSG00000148400/ENSG00000184347/ENSG00000114251/ENSG00000187122/ENSG00000154342	9	SHH/ISLR2/SALL1/RARG/NOTCH1/SLIT3/WNT5A/SLIT1/WNT3A
GO:0001707	mesoderm formation	0.0480405	0.0372727	ENSG00000156574/ENSG00000124216/ENSG00000114251/ENSG00000154342/ENSG00000149922	5	NODAL/SNAI1/WNT5A/WNT3A/TBX6
GO:0051279	regulation of release of sequestered calcium ion into cytosol	0.0480405	0.0372727	ENSG00000018625/ENSG00000198947/ENSG00000149596/ENSG00000183023/ENSG00000134817	5	ATP1A2/DMD/JPH2/SLC8A1/APLNR
GO:0055024	regulation of cardiac muscle tissue development	0.048174	0.0373763	ENSG00000141448/ENSG00000148400/ENSG00000149596/ENSG00000102678/ENSG00000107831/ENSG00000154342	6	GATA6/NOTCH1/JPH2/FGF9/FGF8/WNT3A
GO:0003181	atrioventricular valve morphogenesis	0.048174	0.0373763	ENSG00000142871/ENSG00000148400/ENSG00000184347	3	CCN1/NOTCH1/SLIT3
GO:0006582	melanin metabolic process	0.048174	0.0373763	ENSG00000171791/ENSG00000114251/ENSG00000125931	3	BCL2/WNT5A/CITED1
GO:0010881	regulation of cardiac muscle contraction by regulation of the release of sequestered calcium ion	0.048174	0.0373763	ENSG00000018625/ENSG00000198947/ENSG00000183023	3	ATP1A2/DMD/SLC8A1
GO:0021871	forebrain regionalization	0.048174	0.0373763	ENSG00000164690/ENSG00000128610/ENSG00000107831	3	SHH/FEZF1/FGF8
GO:0030325	adrenal gland development	0.048174	0.0373763	ENSG00000273707/ENSG00000103449/ENSG00000134853	3	CDKN1C/SALL1/PDGFRA
GO:0060740	prostate gland epithelium morphogenesis	0.048174	0.0373763	ENSG00000164690/ENSG00000172819/ENSG00000114251	3	SHH/RARG/WNT5A
GO:0010950	positive regulation of endopeptidase activity	0.0484513	0.0375914	ENSG00000156574/ENSG00000129521/ENSG00000196730/ENSG00000142871/ENSG00000116106/ENSG00000164741/ENSG00000183454/ENSG00000154342	8	NODAL/EGLN3/DAPK1/CCN1/EPHA4/DLC1/GRIN2A/WNT3A
GO:0003151	outflow tract morphogenesis	0.0493426	0.0382829	ENSG00000164093/ENSG00000141448/ENSG00000148400/ENSG00000114251/ENSG00000107831	5	PITX2/GATA6/NOTCH1/WNT5A/FGF8
GO:0010001	glial cell differentiation	0.050061	0.0388403	ENSG00000164690/ENSG00000173406/ENSG00000103653/ENSG00000026025/ENSG00000148400/ENSG00000123560/ENSG00000135919/ENSG00000116106/ENSG00000100678	9	SHH/DAB1/CSK/VIM/NOTCH1/PLP1/SERPINE2/EPHA4/SLC8A3
GO:1903169	regulation of calcium ion transmembrane transport	0.0507083	0.0393425	ENSG00000018625/ENSG00000198947/ENSG00000149596/ENSG00000124942/ENSG00000278232/ENSG00000183023/ENSG00000134817	7	ATP1A2/DMD/JPH2/AHNAK/CRHR1/SLC8A1/APLNR
GO:0090090	negative regulation of canonical Wnt signaling pathway	0.0509619	0.0395393	ENSG00000164690/ENSG00000148737/ENSG00000107263/ENSG00000168646/ENSG00000188803/ENSG00000111186/ENSG00000171843/ENSG00000114251	8	SHH/TCF7L2/RAPGEF1/AXIN2/SHISA6/WNT5B/MLLT3/WNT5A
GO:0021954	central nervous system neuron development	0.0512615	0.0397717	ENSG00000168505/ENSG00000116106/ENSG00000140937/ENSG00000114251/ENSG00000107831	5	GBX2/EPHA4/CDH11/WNT5A/FGF8
GO:0048332	mesoderm morphogenesis	0.0512615	0.0397717	ENSG00000156574/ENSG00000124216/ENSG00000114251/ENSG00000154342/ENSG00000149922	5	NODAL/SNAI1/WNT5A/WNT3A/TBX6
GO:0009100	glycoprotein metabolic process	0.0515138	0.0399675	ENSG00000107742/ENSG00000117643/ENSG00000148737/ENSG00000171791/ENSG00000151388/ENSG00000139289/ENSG00000177511/ENSG00000164574/ENSG00000187676/ENSG00000144057/ENSG00000163378/ENSG00000070731/ENSG00000148488	13	SPOCK2/MAN1C1/TCF7L2/BCL2/ADAMTS12/PHLDA1/ST8SIA3/GALNT10/B3GLCT/ST6GAL2/EOGT/ST6GALNAC2/ST8SIA6
GO:0071772	response to BMP	0.0515138	0.0399675	ENSG00000141448/ENSG00000142871/ENSG00000151388/ENSG00000148400/ENSG00000103056/ENSG00000114251/ENSG00000107831	7	GATA6/CCN1/ADAMTS12/NOTCH1/SMPD3/WNT5A/FGF8
GO:0071773	cellular response to BMP stimulus	0.0515138	0.0399675	ENSG00000141448/ENSG00000142871/ENSG00000151388/ENSG00000148400/ENSG00000103056/ENSG00000114251/ENSG00000107831	7	GATA6/CCN1/ADAMTS12/NOTCH1/SMPD3/WNT5A/FGF8
GO:0090066	regulation of anatomical structure size	0.0515138	0.0399675	ENSG00000077264/ENSG00000018625/ENSG00000132359/ENSG00000158528/ENSG00000120756/ENSG00000167178/ENSG00000172819/ENSG00000158856/ENSG00000163485/ENSG00000009694/ENSG00000006606/ENSG00000114251/ENSG00000183023/ENSG00000154342	14	PAK3/ATP1A2/RAP1GAP2/PPP1R9A/PLS1/ISLR2/RARG/DMTN/ADORA1/TENM1/CCL26/WNT5A/SLC8A1/WNT3A
GO:0002053	positive regulation of mesenchymal cell proliferation	0.0515973	0.0400323	ENSG00000164690/ENSG00000102678/ENSG00000114251	3	SHH/FGF9/WNT5A
GO:0060351	cartilage development involved in endochondral bone morphogenesis	0.0515973	0.0400323	ENSG00000168646/ENSG00000172819/ENSG00000103056	3	AXIN2/RARG/SMPD3
GO:0060384	innervation	0.0515973	0.0400323	ENSG00000145864/ENSG00000144749/ENSG00000135919	3	GABRB2/LRIG1/SERPINE2
GO:0098868	bone growth	0.0515973	0.0400323	ENSG00000172819/ENSG00000103056/ENSG00000162733	3	RARG/SMPD3/DDR2
GO:0035725	sodium ion transmembrane transport	0.0515973	0.0400323	ENSG00000111319/ENSG00000018625/ENSG00000152818/ENSG00000198947/ENSG00000183023/ENSG00000100678	6	SCNN1A/ATP1A2/UTRN/DMD/SLC8A1/SLC8A3
GO:0010976	positive regulation of neuron projection development	0.0536996	0.0416634	ENSG00000077264/ENSG00000124507/ENSG00000158528/ENSG00000167178/ENSG00000110888/ENSG00000107263/ENSG00000182158/ENSG00000116106/ENSG00000114251/ENSG00000154342	10	PAK3/PACSIN1/PPP1R9A/ISLR2/CAPRIN2/RAPGEF1/CREB3L2/EPHA4/WNT5A/WNT3A
GO:0048146	positive regulation of fibroblast proliferation	0.0542824	0.0421155	ENSG00000075426/ENSG00000134853/ENSG00000162733/ENSG00000114251	4	FOSL2/PDGFRA/DDR2/WNT5A
GO:0007179	transforming growth factor beta receptor signaling pathway	0.0550956	0.0427464	ENSG00000156574/ENSG00000273707/ENSG00000140564/ENSG00000089159/ENSG00000128045/ENSG00000183779/ENSG00000168675/ENSG00000125931	8	NODAL/CDKN1C/FURIN/PXN/RASL11B/ZNF703/LDLRAD4/CITED1
GO:0051209	release of sequestered calcium ion into cytosol	0.0550956	0.0427464	ENSG00000018625/ENSG00000198947/ENSG00000149596/ENSG00000150995/ENSG00000183023/ENSG00000134817	6	ATP1A2/DMD/JPH2/ITPR1/SLC8A1/APLNR
GO:0051283	negative regulation of sequestering of calcium ion	0.0550956	0.0427464	ENSG00000018625/ENSG00000198947/ENSG00000149596/ENSG00000150995/ENSG00000183023/ENSG00000134817	6	ATP1A2/DMD/JPH2/ITPR1/SLC8A1/APLNR
GO:0072009	nephron epithelium development	0.0550956	0.0427464	ENSG00000164690/ENSG00000103449/ENSG00000171791/ENSG00000260027/ENSG00000107831/ENSG00000125931	6	SHH/SALL1/BCL2/HOXB7/FGF8/CITED1
GO:1904062	regulation of cation transmembrane transport	0.0551537	0.0427915	ENSG00000018625/ENSG00000152818/ENSG00000175497/ENSG00000196730/ENSG00000198947/ENSG00000149596/ENSG00000124942/ENSG00000278232/ENSG00000183454/ENSG00000183023/ENSG00000134817	11	ATP1A2/UTRN/DPP10/DAPK1/DMD/JPH2/AHNAK/CRHR1/GRIN2A/SLC8A1/APLNR
GO:0002063	chondrocyte development	0.0551537	0.0427915	ENSG00000168646/ENSG00000172819/ENSG00000103056	3	AXIN2/RARG/SMPD3
GO:0003171	atrioventricular valve development	0.0551537	0.0427915	ENSG00000142871/ENSG00000148400/ENSG00000184347	3	CCN1/NOTCH1/SLIT3
GO:0021544	subpallium development	0.0551537	0.0427915	ENSG00000184254/ENSG00000165300/ENSG00000107831	3	ALDH1A3/SLITRK5/FGF8
GO:0060512	prostate gland morphogenesis	0.0551537	0.0427915	ENSG00000164690/ENSG00000172819/ENSG00000114251	3	SHH/RARG/WNT5A
GO:0060561	apoptotic process involved in morphogenesis	0.0551537	0.0427915	ENSG00000142871/ENSG00000138795/ENSG00000148400	3	CCN1/LEF1/NOTCH1
GO:0060669	embryonic placenta morphogenesis	0.0551537	0.0427915	ENSG00000273707/ENSG00000142871/ENSG00000146374	3	CDKN1C/CCN1/RSPO3
GO:1900452	regulation of long-term synaptic depression	0.0551537	0.0427915	ENSG00000157680/ENSG00000158528/ENSG00000163485	3	DGKI/PPP1R9A/ADORA1
GO:0042058	regulation of epidermal growth factor receptor signaling pathway	0.0554475	0.0430195	ENSG00000144580/ENSG00000163485/ENSG00000169129/ENSG00000007384/ENSG00000163235	5	CNOT9/ADORA1/AFAP1L2/RHBDF1/TGFA
GO:0034329	cell junction assembly	0.0554475	0.0430195	ENSG00000082397/ENSG00000107263/ENSG00000095637/ENSG00000128591/ENSG00000158856/ENSG00000171791/ENSG00000124216/ENSG00000183779/ENSG00000164741	9	EPB41L3/RAPGEF1/SORBS1/FLNC/DMTN/BCL2/SNAI1/ZNF703/DLC1
GO:0003179	heart valve morphogenesis	0.0554475	0.0430195	ENSG00000142871/ENSG00000148400/ENSG00000124216/ENSG00000184347	4	CCN1/NOTCH1/SNAI1/SLIT3
GO:0014911	positive regulation of smooth muscle cell migration	0.0554475	0.0430195	ENSG00000171791/ENSG00000170961/ENSG00000102678/ENSG00000104415	4	BCL2/HAS2/FGF9/CCN4
GO:0036465	synaptic vesicle recycling	0.0554475	0.0430195	ENSG00000116675/ENSG00000124507/ENSG00000145214/ENSG00000154342	4	DNAJC6/PACSIN1/DGKQ/WNT3A
GO:0022409	positive regulation of cell-cell adhesion	0.0563619	0.0437289	ENSG00000156574/ENSG00000164690/ENSG00000160685/ENSG00000077264/ENSG00000145555/ENSG00000103653/ENSG00000158856/ENSG00000020633/ENSG00000170961/ENSG00000114251/ENSG00000154342	11	NODAL/SHH/ZBTB7B/PAK3/MYO10/CSK/DMTN/RUNX3/HAS2/WNT5A/WNT3A
GO:0016358	dendrite development	0.0564898	0.0438281	ENSG00000077264/ENSG00000046889/ENSG00000124507/ENSG00000173406/ENSG00000158528/ENSG00000110888/ENSG00000169439/ENSG00000165300/ENSG00000116106	9	PAK3/PREX2/PACSIN1/DAB1/PPP1R9A/CAPRIN2/SDC2/SLITRK5/EPHA4
GO:2001056	positive regulation of cysteine-type endopeptidase activity	0.0567274	0.0440125	ENSG00000156574/ENSG00000129521/ENSG00000196730/ENSG00000142871/ENSG00000164741/ENSG00000183454/ENSG00000154342	7	NODAL/EGLN3/DAPK1/CCN1/DLC1/GRIN2A/WNT3A
GO:0042303	molting cycle	0.0567274	0.0440125	ENSG00000164690/ENSG00000144749/ENSG00000171791/ENSG00000124216/ENSG00000114251/ENSG00000135960	6	SHH/LRIG1/BCL2/SNAI1/WNT5A/EDAR
GO:0042633	hair cycle	0.0567274	0.0440125	ENSG00000164690/ENSG00000144749/ENSG00000171791/ENSG00000124216/ENSG00000114251/ENSG00000135960	6	SHH/LRIG1/BCL2/SNAI1/WNT5A/EDAR
GO:0051282	regulation of sequestering of calcium ion	0.0567274	0.0440125	ENSG00000018625/ENSG00000198947/ENSG00000149596/ENSG00000150995/ENSG00000183023/ENSG00000134817	6	ATP1A2/DMD/JPH2/ITPR1/SLC8A1/APLNR
GO:0045685	regulation of glial cell differentiation	0.0568779	0.0441293	ENSG00000164690/ENSG00000173406/ENSG00000148400/ENSG00000135919/ENSG00000116106	5	SHH/DAB1/NOTCH1/SERPINE2/EPHA4
GO:0055117	regulation of cardiac muscle contraction	0.0568779	0.0441293	ENSG00000018625/ENSG00000046604/ENSG00000198947/ENSG00000163485/ENSG00000183023	5	ATP1A2/DSG2/DMD/ADORA1/SLC8A1
GO:0071320	cellular response to cAMP	0.057857	0.0448889	ENSG00000107263/ENSG00000158856/ENSG00000183023/ENSG00000100678	4	RAPGEF1/DMTN/SLC8A1/SLC8A3
GO:0048639	positive regulation of developmental growth	0.0580342	0.0450264	ENSG00000141448/ENSG00000120756/ENSG00000167178/ENSG00000171791/ENSG00000148400/ENSG00000102678/ENSG00000107831/ENSG00000154342	8	GATA6/PLS1/ISLR2/BCL2/NOTCH1/FGF9/FGF8/WNT3A
GO:0018105	peptidyl-serine phosphorylation	0.0581308	0.0451013	ENSG00000110888/ENSG00000144580/ENSG00000145214/ENSG00000198947/ENSG00000158856/ENSG00000171791/ENSG00000009694/ENSG00000114251/ENSG00000154342	9	CAPRIN2/CNOT9/DGKQ/DMD/DMTN/BCL2/TENM1/WNT5A/WNT3A
GO:0035116	embryonic hindlimb morphogenesis	0.0581542	0.0451195	ENSG00000164690/ENSG00000172819/ENSG00000107831	3	SHH/RARG/FGF8
GO:0044331	cell-cell adhesion mediated by cadherin	0.0581542	0.0451195	ENSG00000166689/ENSG00000114251/ENSG00000154342	3	PLEKHA7/WNT5A/WNT3A
GO:0048730	epidermis morphogenesis	0.0581542	0.0451195	ENSG00000164690/ENSG00000171791/ENSG00000124216	3	SHH/BCL2/SNAI1
GO:0032535	regulation of cellular component size	0.0592624	0.0459793	ENSG00000077264/ENSG00000132359/ENSG00000158528/ENSG00000120756/ENSG00000167178/ENSG00000172819/ENSG00000158856/ENSG00000009694/ENSG00000006606/ENSG00000114251/ENSG00000154342	11	PAK3/RAP1GAP2/PPP1R9A/PLS1/ISLR2/RARG/DMTN/TENM1/CCL26/WNT5A/WNT3A
GO:0051146	striated muscle cell differentiation	0.0593415	0.0460406	ENSG00000141448/ENSG00000164690/ENSG00000198947/ENSG00000128591/ENSG00000171791/ENSG00000148400/ENSG00000138119/ENSG00000134853/ENSG00000183023/ENSG00000154342	10	GATA6/SHH/DMD/FLNC/BCL2/NOTCH1/MYOF/PDGFRA/SLC8A1/WNT3A
GO:0071560	cellular response to transforming growth factor beta stimulus	0.0600491	0.0465897	ENSG00000156574/ENSG00000273707/ENSG00000140564/ENSG00000089159/ENSG00000128045/ENSG00000183779/ENSG00000168675/ENSG00000114251/ENSG00000125931	9	NODAL/CDKN1C/FURIN/PXN/RASL11B/ZNF703/LDLRAD4/WNT5A/CITED1
GO:0007632	visual behavior	0.0600491	0.0465897	ENSG00000018625/ENSG00000105991/ENSG00000134138/ENSG00000183454	4	ATP1A2/HOXA1/MEIS2/GRIN2A
GO:0048747	muscle fiber development	0.0600491	0.0465897	ENSG00000198947/ENSG00000128591/ENSG00000171791/ENSG00000138119	4	DMD/FLNC/BCL2/MYOF
GO:0007088	regulation of mitotic nuclear division	0.0600491	0.0465897	ENSG00000136014/ENSG00000273707/ENSG00000118007/ENSG00000178295/ENSG00000103056/ENSG00000107831/ENSG00000163235	7	USP44/CDKN1C/STAG1/GEN1/SMPD3/FGF8/TGFA
GO:0043491	protein kinase B signaling	0.0612287	0.0475049	ENSG00000148737/ENSG00000107263/ENSG00000133056/ENSG00000111252/ENSG00000103056/ENSG00000134853/ENSG00000102678/ENSG00000158815/ENSG00000107831/ENSG00000163235	10	TCF7L2/RAPGEF1/PIK3C2B/SH2B3/SMPD3/PDGFRA/FGF9/FGF17/FGF8/TGFA
GO:0051208	sequestering of calcium ion	0.0612287	0.0475049	ENSG00000018625/ENSG00000198947/ENSG00000149596/ENSG00000150995/ENSG00000183023/ENSG00000134817	6	ATP1A2/DMD/JPH2/ITPR1/SLC8A1/APLNR
GO:0022407	regulation of cell-cell adhesion	0.0615363	0.0477435	ENSG00000156574/ENSG00000164690/ENSG00000160685/ENSG00000077264/ENSG00000145555/ENSG00000103653/ENSG00000111252/ENSG00000158856/ENSG00000135919/ENSG00000183779/ENSG00000020633/ENSG00000170961/ENSG00000114251/ENSG00000154342	14	NODAL/SHH/ZBTB7B/PAK3/MYO10/CSK/SH2B3/DMTN/SERPINE2/ZNF703/RUNX3/HAS2/WNT5A/WNT3A
GO:0003180	aortic valve morphogenesis	0.0622872	0.0483261	ENSG00000148400/ENSG00000124216/ENSG00000184347	3	NOTCH1/SNAI1/SLIT3
GO:0010882	regulation of cardiac muscle contraction by calcium ion signaling	0.0622872	0.0483261	ENSG00000018625/ENSG00000198947/ENSG00000183023	3	ATP1A2/DMD/SLC8A1
GO:0061037	negative regulation of cartilage development	0.0622872	0.0483261	ENSG00000172819/ENSG00000151388/ENSG00000104415	3	RARG/ADAMTS12/CCN4
GO:0021879	forebrain neuron differentiation	0.0626665	0.0486204	ENSG00000168505/ENSG00000103449/ENSG00000114251/ENSG00000107831	4	GBX2/SALL1/WNT5A/FGF8
GO:0046661	male sex differentiation	0.0626665	0.0486204	ENSG00000141448/ENSG00000164690/ENSG00000171791/ENSG00000134853/ENSG00000102678/ENSG00000114251/ENSG00000107831	7	GATA6/SHH/BCL2/PDGFRA/FGF9/WNT5A/FGF8
GO:0048592	eye morphogenesis	0.0626665	0.0486204	ENSG00000164093/ENSG00000184254/ENSG00000172819/ENSG00000130635/ENSG00000171791/ENSG00000204262/ENSG00000114251	7	PITX2/ALDH1A3/RARG/COL5A1/BCL2/COL5A2/WNT5A

## Sheet: Downstream
Gene Name	Peak Value	log2FoldChange	padj
MSGN1	339	-8.01209	0.000419792
HOXD1	114	-5.86251	0.000113501
HOXD3	203	-5.75675	0.00146043
UNC5C	276	-5.25012	3.04598e-11
PENK	22	-4.98675	0.00723141
SPTLC3	153	-4.77687	0.000548673
HAGLR	114	-4.70093	1.09613e-05
FOXC1	59	-4.41159	0.000852014
HES7	311	-4.38883	5.70446e-05
FOXF1	181	-3.56471	0.0269947
HOXA-AS3	181	-3.30651	0.00959368
WNT3A	150	-3.25618	7.57641e-06
APLNR	177	-3.2429	0.00029504
FAM163A	34	-3.05633	6.49467e-07
FGF8	160	-2.94278	0.0493107
KCNJ3	47	-2.73747	0.0274921
HOXC5	154	-2.56935	0.00147808
FGF17	145	-2.50205	0.000979385
KRT74	141	-2.4999	0.0228313
HOXA2	173	-2.32141	2.37007e-06
ST6GALNAC2	28	-2.23663	0.0131415
MSX1	70	-2.01305	7.57641e-06
EPHA4	167	-1.92673	6.38945e-08
MEIS2	206	-1.83117	0.0095987
ADAMTS17	134	-1.8052	0.0171649
SNAI1	100	-1.69013	6.4468e-05
ENC1	107	-1.60493	1.21187e-05
HOXA3	267	-1.57633	0.00275687
SORCS2	72	-1.37576	0.00694265
HOXB5	82	-1.29947	0.020088
AHNAK	74	-1.28079	0.0224358
EVX1	170	-1.23726	0.00257521
HOXB2	89	-1.21035	0.0115685
URAD	104	-1.17583	0.00072867
GSTM3	101	-1.16654	0.0157002
GLTP	29	-1.13228	0.000550474
PER1	64	-1.08217	0.00157784
GNG4	41	-1.08204	0.0158125
ELL2	67	-0.991414	4.04212e-06
CDX1	64	-0.943038	0.00576303
HOXA1	173	-0.832803	4.99351e-06
GEN1	229	-0.773262	0.0266387
AMOTL2	132	-0.74999	5.23168e-06
DYRK3	45	-0.712148	0.0228313
SORBS1	178	-0.676409	0.00562035
FAM53B	144	-0.64693	0.0468839
SP8	195	-0.621514	0.0486327
AXIN2	152	-0.612181	0.00104972
PLD2	24	-0.546394	0.00260395
ARHGEF40	35	0.524995	0.00875724
TGIF1	199	0.64262	0.00814244
TCF7L2	221	0.717466	0.0158125
TMEM170B	29	0.726838	0.0275
GHDC	32	0.729027	0.0486431
FAM212B	141	0.765226	0.00818077
RPRM	52	0.781248	0.0019245
ISLR	26	0.782163	0.0332673
GBX2	85	0.81204	6.38678e-05
PPP1R9A	30	0.851187	0.0123064
PAK1	34	0.885021	2.47611e-07
C5orf38	27	0.923295	0.0489496
GPRC5B	39	0.930784	0.018318
LRRC16B	31	0.937865	0.0110921
RABGAP1L	43	0.940801	0.00256601
LINC00649	24	0.956542	0.0252764
SLC37A1	42	0.965321	0.020088
PACSIN1	40	0.965688	0.0236806
ZIC2	114	1.017	0.00194866
IRF2BPL	29	1.12721	0.00442425
PCDH1	45	1.12735	0.000788249
EPCAM	52	1.15516	0.0449987
FAM46B	30	1.18562	2.84568e-06
MVP	70	1.18752	0.0211824
ATP8A1	87	1.33746	0.00679763
SCNN1A	47	1.42046	1.19545e-05
FOXP4	81	1.42678	2.48493e-08
FAM101A	59	1.5278	0.00794342
MMP17	22	1.64077	1.31794e-06
AURKC	38	1.70128	0.0147516
CD177	42	3.30728	0.0188121
C1orf61	204	3.39767	0.00964734
SOX21	50	3.64196	1.25571e-10
LHX1	39	6.23967	6.62166e-05

## Sheet: GO-BP (intergenic)
ID	Description	p.adjust	qvalue	geneID	Count	geneSymbol
GO:0003002	regionalization	7.28815e-13	5.96591e-13	ENSG00000274577/ENSG00000168505/ENSG00000168646/ENSG00000164651/ENSG00000113722/ENSG00000173917/ENSG00000106038/ENSG00000105997/ENSG00000124216/ENSG00000163132/ENSG00000105996/ENSG00000107831/ENSG00000154342/ENSG00000103241/ENSG00000179111/ENSG00000054598/ENSG00000128652/ENSG00000151379	18	LHX1/GBX2/AXIN2/SP8/CDX1/HOXB2/EVX1/HOXA3/SNAI1/MSX1/HOXA2/FGF8/WNT3A/FOXF1/HES7/FOXC1/HOXD3/MSGN1
GO:0007389	pattern specification process	2.32109e-11	1.89999e-11	ENSG00000274577/ENSG00000168505/ENSG00000168646/ENSG00000164651/ENSG00000113722/ENSG00000173917/ENSG00000106038/ENSG00000105997/ENSG00000124216/ENSG00000163132/ENSG00000105996/ENSG00000107831/ENSG00000154342/ENSG00000103241/ENSG00000179111/ENSG00000054598/ENSG00000128652/ENSG00000151379	18	LHX1/GBX2/AXIN2/SP8/CDX1/HOXB2/EVX1/HOXA3/SNAI1/MSX1/HOXA2/FGF8/WNT3A/FOXF1/HES7/FOXC1/HOXD3/MSGN1
GO:0009952	anterior/posterior pattern specification	4.5554e-09	3.72894e-09	ENSG00000274577/ENSG00000168505/ENSG00000168646/ENSG00000113722/ENSG00000173917/ENSG00000163132/ENSG00000107831/ENSG00000154342/ENSG00000103241/ENSG00000179111/ENSG00000054598/ENSG00000128652	12	LHX1/GBX2/AXIN2/CDX1/HOXB2/MSX1/FGF8/WNT3A/FOXF1/HES7/FOXC1/HOXD3
GO:0035282	segmentation	4.16634e-08	3.41047e-08	ENSG00000274577/ENSG00000168646/ENSG00000113722/ENSG00000105996/ENSG00000154342/ENSG00000103241/ENSG00000179111/ENSG00000054598/ENSG00000151379	9	LHX1/AXIN2/CDX1/HOXA2/WNT3A/FOXF1/HES7/FOXC1/MSGN1
GO:0001756	somitogenesis	1.50057e-06	1.22833e-06	ENSG00000274577/ENSG00000168646/ENSG00000113722/ENSG00000154342/ENSG00000103241/ENSG00000179111/ENSG00000054598	7	LHX1/AXIN2/CDX1/WNT3A/FOXF1/HES7/FOXC1
GO:0048705	skeletal system morphogenesis	1.88566e-06	1.54355e-06	ENSG00000274577/ENSG00000168646/ENSG00000105991/ENSG00000113722/ENSG00000173917/ENSG00000120075/ENSG00000163132/ENSG00000105996/ENSG00000054598/ENSG00000128652	10	LHX1/AXIN2/HOXA1/CDX1/HOXB2/HOXB5/MSX1/HOXA2/FOXC1/HOXD3
GO:0048568	embryonic organ development	2.89604e-06	2.37063e-06	ENSG00000274577/ENSG00000168505/ENSG00000105991/ENSG00000173917/ENSG00000120075/ENSG00000124216/ENSG00000163132/ENSG00000105996/ENSG00000107831/ENSG00000154342/ENSG00000103241/ENSG00000054598/ENSG00000128652	13	LHX1/GBX2/HOXA1/HOXB2/HOXB5/SNAI1/MSX1/HOXA2/FGF8/WNT3A/FOXF1/FOXC1/HOXD3
GO:0048562	embryonic organ morphogenesis	2.89604e-06	2.37063e-06	ENSG00000274577/ENSG00000168505/ENSG00000105991/ENSG00000173917/ENSG00000120075/ENSG00000163132/ENSG00000105996/ENSG00000107831/ENSG00000154342/ENSG00000103241/ENSG00000128652	11	LHX1/GBX2/HOXA1/HOXB2/HOXB5/MSX1/HOXA2/FGF8/WNT3A/FOXF1/HOXD3
GO:0048706	embryonic skeletal system development	3.98774e-06	3.26427e-06	ENSG00000274577/ENSG00000105991/ENSG00000173917/ENSG00000120075/ENSG00000105996/ENSG00000172789/ENSG00000128652/ENSG00000128645	8	LHX1/HOXA1/HOXB2/HOXB5/HOXA2/HOXC5/HOXD3/HOXD1
GO:0061053	somite development	4.73565e-06	3.87649e-06	ENSG00000274577/ENSG00000168646/ENSG00000113722/ENSG00000154342/ENSG00000103241/ENSG00000179111/ENSG00000054598	7	LHX1/AXIN2/CDX1/WNT3A/FOXF1/HES7/FOXC1
GO:0072132	mesenchyme morphogenesis	5.88227e-06	4.81508e-06	ENSG00000124216/ENSG00000163132/ENSG00000107831/ENSG00000154342/ENSG00000103241/ENSG00000054598	6	SNAI1/MSX1/FGF8/WNT3A/FOXF1/FOXC1
GO:0009953	dorsal/ventral pattern formation	1.01302e-05	8.29237e-06	ENSG00000274577/ENSG00000164651/ENSG00000173917/ENSG00000106038/ENSG00000105996/ENSG00000107831/ENSG00000154342	7	LHX1/SP8/HOXB2/EVX1/HOXA2/FGF8/WNT3A
GO:0048704	embryonic skeletal system morphogenesis	0.000134085	0.000109758	ENSG00000274577/ENSG00000105991/ENSG00000173917/ENSG00000120075/ENSG00000105996/ENSG00000128652	6	LHX1/HOXA1/HOXB2/HOXB5/HOXA2/HOXD3
GO:0008045	motor neuron axon guidance	0.000193842	0.000158674	ENSG00000274577/ENSG00000116106/ENSG00000105996/ENSG00000107831	4	LHX1/EPHA4/HOXA2/FGF8
GO:0021602	cranial nerve morphogenesis	0.000476977	0.000390442	ENSG00000105991/ENSG00000173917/ENSG00000105997/ENSG00000128652	4	HOXA1/HOXB2/HOXA3/HOXD3
GO:0060485	mesenchyme development	0.000812589	0.000665166	ENSG00000168505/ENSG00000168646/ENSG00000124216/ENSG00000163132/ENSG00000107831/ENSG00000154342/ENSG00000103241/ENSG00000054598	8	GBX2/AXIN2/SNAI1/MSX1/FGF8/WNT3A/FOXF1/FOXC1
GO:0042471	ear morphogenesis	0.000831827	0.000680913	ENSG00000168505/ENSG00000105991/ENSG00000163132/ENSG00000105996/ENSG00000107831/ENSG00000154342	6	GBX2/HOXA1/MSX1/HOXA2/FGF8/WNT3A
GO:0007369	gastrulation	0.000862839	0.000706299	ENSG00000274577/ENSG00000124216/ENSG00000107831/ENSG00000134817/ENSG00000154342/ENSG00000103241/ENSG00000054598	7	LHX1/SNAI1/FGF8/APLNR/WNT3A/FOXF1/FOXC1
GO:0007498	mesoderm development	0.0011526	0.000943492	ENSG00000124216/ENSG00000107831/ENSG00000154342/ENSG00000103241/ENSG00000179111/ENSG00000054598	6	SNAI1/FGF8/WNT3A/FOXF1/HES7/FOXC1
GO:0007411	axon guidance	0.00150768	0.00123415	ENSG00000274577/ENSG00000168505/ENSG00000116106/ENSG00000105996/ENSG00000107831/ENSG00000154342/ENSG00000182168	7	LHX1/GBX2/EPHA4/HOXA2/FGF8/WNT3A/UNC5C
GO:0097485	neuron projection guidance	0.00152378	0.00124733	ENSG00000274577/ENSG00000168505/ENSG00000116106/ENSG00000105996/ENSG00000107831/ENSG00000154342/ENSG00000182168	7	LHX1/GBX2/EPHA4/HOXA2/FGF8/WNT3A/UNC5C
GO:0003197	endocardial cushion development	0.00212809	0.00174201	ENSG00000124216/ENSG00000163132/ENSG00000107831/ENSG00000103241	4	SNAI1/MSX1/FGF8/FOXF1
GO:0003198	epithelial to mesenchymal transition involved in endocardial cushion formation	0.00253066	0.00207154	ENSG00000124216/ENSG00000163132/ENSG00000107831	3	SNAI1/MSX1/FGF8
GO:0030902	hindbrain development	0.00271834	0.00222517	ENSG00000274577/ENSG00000149269/ENSG00000168505/ENSG00000173917/ENSG00000105996/ENSG00000054598	6	LHX1/PAK1/GBX2/HOXB2/HOXA2/FOXC1
GO:0010718	positive regulation of epithelial to mesenchymal transition	0.00271834	0.00222517	ENSG00000148737/ENSG00000168646/ENSG00000124216/ENSG00000054598	4	TCF7L2/AXIN2/SNAI1/FOXC1
GO:0021545	cranial nerve development	0.00271834	0.00222517	ENSG00000105991/ENSG00000173917/ENSG00000105997/ENSG00000128652	4	HOXA1/HOXB2/HOXA3/HOXD3
GO:0023019	signal transduction involved in regulation of gene expression	0.00295668	0.00242027	ENSG00000119888/ENSG00000163132/ENSG00000107831	3	EPCAM/MSX1/FGF8
GO:0003007	heart morphogenesis	0.00295668	0.00242027	ENSG00000168646/ENSG00000124216/ENSG00000163132/ENSG00000107831/ENSG00000154342/ENSG00000103241/ENSG00000054598	7	AXIN2/SNAI1/MSX1/FGF8/WNT3A/FOXF1/FOXC1
GO:0030878	thyroid gland development	0.00333738	0.0027319	ENSG00000105997/ENSG00000107831/ENSG00000128652	3	HOXA3/FGF8/HOXD3
GO:0021953	central nervous system neuron differentiation	0.00449982	0.00368345	ENSG00000274577/ENSG00000168505/ENSG00000106038/ENSG00000116106/ENSG00000107831/ENSG00000154342	6	LHX1/GBX2/EVX1/EPHA4/FGF8/WNT3A
GO:0048645	animal organ formation	0.00462662	0.00378724	ENSG00000168646/ENSG00000105997/ENSG00000107831/ENSG00000154342	4	AXIN2/HOXA3/FGF8/WNT3A
GO:0090596	sensory organ morphogenesis	0.00478255	0.00391488	ENSG00000274577/ENSG00000168505/ENSG00000105991/ENSG00000163132/ENSG00000105996/ENSG00000107831/ENSG00000154342	7	LHX1/GBX2/HOXA1/MSX1/HOXA2/FGF8/WNT3A
GO:0003272	endocardial cushion formation	0.00515063	0.00421618	ENSG00000124216/ENSG00000163132/ENSG00000107831	3	SNAI1/MSX1/FGF8
GO:0048762	mesenchymal cell differentiation	0.00673523	0.00551329	ENSG00000168505/ENSG00000168646/ENSG00000124216/ENSG00000163132/ENSG00000107831/ENSG00000054598	6	GBX2/AXIN2/SNAI1/MSX1/FGF8/FOXC1
GO:0001704	formation of primary germ layer	0.00757864	0.00620369	ENSG00000274577/ENSG00000124216/ENSG00000154342/ENSG00000103241/ENSG00000054598	5	LHX1/SNAI1/WNT3A/FOXF1/FOXC1
GO:0007409	axonogenesis	0.00790889	0.00647403	ENSG00000274577/ENSG00000149269/ENSG00000168505/ENSG00000116106/ENSG00000105996/ENSG00000107831/ENSG00000154342/ENSG00000182168	8	LHX1/PAK1/GBX2/EPHA4/HOXA2/FGF8/WNT3A/UNC5C
GO:0072001	renal system development	0.00822915	0.00673618	ENSG00000274577/ENSG00000198598/ENSG00000119888/ENSG00000116106/ENSG00000107831/ENSG00000103241/ENSG00000054598	7	LHX1/MMP17/EPCAM/EPHA4/FGF8/FOXF1/FOXC1
GO:0045995	regulation of embryonic development	0.00822915	0.00673618	ENSG00000274577/ENSG00000113722/ENSG00000124216/ENSG00000154342/ENSG00000179111	5	LHX1/CDX1/SNAI1/WNT3A/HES7
GO:0021675	nerve development	0.00822915	0.00673618	ENSG00000105991/ENSG00000173917/ENSG00000105997/ENSG00000128652	4	HOXA1/HOXB2/HOXA3/HOXD3
GO:0048844	artery morphogenesis	0.0088823	0.00727084	ENSG00000105991/ENSG00000107831/ENSG00000103241/ENSG00000054598	4	HOXA1/FGF8/FOXF1/FOXC1
GO:0061311	cell surface receptor signaling pathway involved in heart development	0.00903293	0.00739414	ENSG00000124216/ENSG00000163132/ENSG00000154342	3	SNAI1/MSX1/WNT3A
GO:0001707	mesoderm formation	0.00925089	0.00757255	ENSG00000124216/ENSG00000154342/ENSG00000103241/ENSG00000054598	4	SNAI1/WNT3A/FOXF1/FOXC1
GO:0060317	cardiac epithelial to mesenchymal transition	0.00925089	0.00757255	ENSG00000124216/ENSG00000163132/ENSG00000107831	3	SNAI1/MSX1/FGF8
GO:0001837	epithelial to mesenchymal transition	0.00925089	0.00757255	ENSG00000168646/ENSG00000124216/ENSG00000163132/ENSG00000107831/ENSG00000054598	5	AXIN2/SNAI1/MSX1/FGF8/FOXC1
GO:0048332	mesoderm morphogenesis	0.00925089	0.00757255	ENSG00000124216/ENSG00000154342/ENSG00000103241/ENSG00000054598	4	SNAI1/WNT3A/FOXF1/FOXC1
GO:0043583	ear development	0.00925089	0.00757255	ENSG00000168505/ENSG00000105991/ENSG00000163132/ENSG00000105996/ENSG00000107831/ENSG00000154342	6	GBX2/HOXA1/MSX1/HOXA2/FGF8/WNT3A
GO:0072073	kidney epithelium development	0.00925089	0.00757255	ENSG00000274577/ENSG00000119888/ENSG00000116106/ENSG00000107831/ENSG00000054598	5	LHX1/EPCAM/EPHA4/FGF8/FOXC1
GO:0010092	specification of animal organ identity	0.00931433	0.00762448	ENSG00000168646/ENSG00000107831/ENSG00000154342	3	AXIN2/FGF8/WNT3A
GO:0043516	regulation of DNA damage response, signal transduction by p53 class mediator	0.00998003	0.00816941	ENSG00000143479/ENSG00000124216/ENSG00000163132	3	DYRK3/SNAI1/MSX1
GO:0060070	canonical Wnt signaling pathway	0.0104591	0.00856156	ENSG00000167191/ENSG00000205269/ENSG00000148737/ENSG00000168646/ENSG00000189319/ENSG00000107831/ENSG00000154342	7	GPRC5B/TMEM170B/TCF7L2/AXIN2/FAM53B/FGF8/WNT3A
GO:0003203	endocardial cushion morphogenesis	0.0104591	0.00856156	ENSG00000124216/ENSG00000163132/ENSG00000107831	3	SNAI1/MSX1/FGF8
GO:0001655	urogenital system development	0.0110176	0.00901876	ENSG00000274577/ENSG00000198598/ENSG00000119888/ENSG00000116106/ENSG00000107831/ENSG00000103241/ENSG00000054598	7	LHX1/MMP17/EPCAM/EPHA4/FGF8/FOXF1/FOXC1
GO:0061564	axon development	0.0117789	0.00964191	ENSG00000274577/ENSG00000149269/ENSG00000168505/ENSG00000116106/ENSG00000105996/ENSG00000107831/ENSG00000154342/ENSG00000182168	8	LHX1/PAK1/GBX2/EPHA4/HOXA2/FGF8/WNT3A/UNC5C
GO:0060349	bone morphogenesis	0.0119702	0.00979848	ENSG00000168646/ENSG00000113722/ENSG00000163132/ENSG00000054598	4	AXIN2/CDX1/MSX1/FOXC1
GO:0060562	epithelial tube morphogenesis	0.0127826	0.0104635	ENSG00000274577/ENSG00000149269/ENSG00000168505/ENSG00000116106/ENSG00000107831/ENSG00000154342/ENSG00000103241	7	LHX1/PAK1/GBX2/EPHA4/FGF8/WNT3A/FOXF1
GO:0021532	neural tube patterning	0.0131565	0.0107696	ENSG00000168505/ENSG00000107831/ENSG00000154342	3	GBX2/FGF8/WNT3A
GO:0010717	regulation of epithelial to mesenchymal transition	0.0144928	0.0118634	ENSG00000148737/ENSG00000168646/ENSG00000124216/ENSG00000054598	4	TCF7L2/AXIN2/SNAI1/FOXC1
GO:0061097	regulation of protein tyrosine kinase activity	0.0147287	0.0120565	ENSG00000013364/ENSG00000167191/ENSG00000116106/ENSG00000154342	4	MVP/GPRC5B/EPHA4/WNT3A
GO:0048863	stem cell differentiation	0.0147287	0.0120565	ENSG00000125285/ENSG00000119888/ENSG00000168505/ENSG00000163132/ENSG00000154342/ENSG00000054598	6	SOX21/EPCAM/GBX2/MSX1/WNT3A/FOXC1
GO:0045666	positive regulation of neuron differentiation	0.0147287	0.0120565	ENSG00000124507/ENSG00000167191/ENSG00000149269/ENSG00000158528/ENSG00000116106/ENSG00000154342/ENSG00000128652	7	PACSIN1/GPRC5B/PAK1/PPP1R9A/EPHA4/WNT3A/HOXD3
GO:0048754	branching morphogenesis of an epithelial tube	0.0149114	0.0122061	ENSG00000274577/ENSG00000149269/ENSG00000168505/ENSG00000107831/ENSG00000103241	5	LHX1/PAK1/GBX2/FGF8/FOXF1
GO:0060840	artery development	0.0161442	0.0132152	ENSG00000105991/ENSG00000107831/ENSG00000103241/ENSG00000054598	4	HOXA1/FGF8/FOXF1/FOXC1
GO:0048703	embryonic viscerocranium morphogenesis	0.0165803	0.0135723	ENSG00000274577/ENSG00000105996	2	LHX1/HOXA2
GO:0060536	cartilage morphogenesis	0.0165803	0.0135723	ENSG00000124216/ENSG00000163132	2	SNAI1/MSX1
GO:0032092	positive regulation of protein binding	0.0165803	0.0135723	ENSG00000148737/ENSG00000105997/ENSG00000116106/ENSG00000154342	4	TCF7L2/HOXA3/EPHA4/WNT3A
GO:0001657	ureteric bud development	0.017153	0.014041	ENSG00000274577/ENSG00000119888/ENSG00000107831/ENSG00000054598	4	LHX1/EPCAM/FGF8/FOXC1
GO:0042472	inner ear morphogenesis	0.017153	0.014041	ENSG00000168505/ENSG00000105991/ENSG00000107831/ENSG00000154342	4	GBX2/HOXA1/FGF8/WNT3A
GO:0072163	mesonephric epithelium development	0.017153	0.014041	ENSG00000274577/ENSG00000119888/ENSG00000107831/ENSG00000054598	4	LHX1/EPCAM/FGF8/FOXC1
GO:0072164	mesonephric tubule development	0.017153	0.014041	ENSG00000274577/ENSG00000119888/ENSG00000107831/ENSG00000054598	4	LHX1/EPCAM/FGF8/FOXC1
GO:0048701	embryonic cranial skeleton morphogenesis	0.017153	0.014041	ENSG00000274577/ENSG00000105991/ENSG00000105996	3	LHX1/HOXA1/HOXA2
GO:0001974	blood vessel remodeling	0.0180078	0.0147408	ENSG00000105997/ENSG00000107831/ENSG00000054598	3	HOXA3/FGF8/FOXC1
GO:0021903	rostrocaudal neural tube patterning	0.0180078	0.0147408	ENSG00000168505/ENSG00000107831	2	GBX2/FGF8
GO:0060828	regulation of canonical Wnt signaling pathway	0.0184381	0.015093	ENSG00000167191/ENSG00000205269/ENSG00000148737/ENSG00000168646/ENSG00000189319/ENSG00000154342	6	GPRC5B/TMEM170B/TCF7L2/AXIN2/FAM53B/WNT3A
GO:0001823	mesonephros development	0.0184381	0.015093	ENSG00000274577/ENSG00000119888/ENSG00000107831/ENSG00000054598	4	LHX1/EPCAM/FGF8/FOXC1
GO:0051216	cartilage development	0.0184381	0.015093	ENSG00000168646/ENSG00000105997/ENSG00000124216/ENSG00000163132/ENSG00000128652	5	AXIN2/HOXA3/SNAI1/MSX1/HOXD3
GO:0051099	positive regulation of binding	0.0190617	0.0156034	ENSG00000148737/ENSG00000105997/ENSG00000116106/ENSG00000154342/ENSG00000054598	5	TCF7L2/HOXA3/EPHA4/WNT3A/FOXC1
GO:0001822	kidney development	0.0202952	0.0166131	ENSG00000274577/ENSG00000198598/ENSG00000119888/ENSG00000116106/ENSG00000107831/ENSG00000054598	6	LHX1/MMP17/EPCAM/EPHA4/FGF8/FOXC1
GO:2000677	regulation of transcription regulatory region DNA binding	0.0208334	0.0170537	ENSG00000163132/ENSG00000154342/ENSG00000054598	3	MSX1/WNT3A/FOXC1
GO:0021515	cell differentiation in spinal cord	0.0217699	0.0178203	ENSG00000274577/ENSG00000106038/ENSG00000154342	3	LHX1/EVX1/WNT3A
GO:0036465	synaptic vesicle recycling	0.0225895	0.0184913	ENSG00000124507/ENSG00000129219/ENSG00000154342	3	PACSIN1/PLD2/WNT3A
GO:2000543	positive regulation of gastrulation	0.0225895	0.0184913	ENSG00000274577/ENSG00000154342	2	LHX1/WNT3A
GO:0060348	bone development	0.0230975	0.018907	ENSG00000168646/ENSG00000113722/ENSG00000163132/ENSG00000107831/ENSG00000054598	5	AXIN2/CDX1/MSX1/FGF8/FOXC1
GO:0061138	morphogenesis of a branching epithelium	0.0238202	0.0194987	ENSG00000274577/ENSG00000149269/ENSG00000168505/ENSG00000107831/ENSG00000103241	5	LHX1/PAK1/GBX2/FGF8/FOXF1
GO:0003128	heart field specification	0.0253509	0.0207516	ENSG00000168646/ENSG00000154342	2	AXIN2/WNT3A
GO:0035270	endocrine system development	0.0276784	0.0226568	ENSG00000105997/ENSG00000163132/ENSG00000107831/ENSG00000128652	4	HOXA3/MSX1/FGF8/HOXD3
GO:0021527	spinal cord association neuron differentiation	0.0281731	0.0230619	ENSG00000274577/ENSG00000154342	2	LHX1/WNT3A
GO:0072178	nephric duct morphogenesis	0.0281731	0.0230619	ENSG00000274577/ENSG00000116106	2	LHX1/EPHA4
GO:0042476	odontogenesis	0.0283187	0.023181	ENSG00000168646/ENSG00000163132/ENSG00000107831/ENSG00000054598	4	AXIN2/MSX1/FGF8/FOXC1
GO:0001763	morphogenesis of a branching structure	0.029624	0.0242495	ENSG00000274577/ENSG00000149269/ENSG00000168505/ENSG00000107831/ENSG00000103241	5	LHX1/PAK1/GBX2/FGF8/FOXF1
GO:0043518	negative regulation of DNA damage response, signal transduction by p53 class mediator	0.0310483	0.0254154	ENSG00000143479/ENSG00000124216	2	DYRK3/SNAI1
GO:0061098	positive regulation of protein tyrosine kinase activity	0.0339695	0.0278067	ENSG00000167191/ENSG00000116106/ENSG00000154342	3	GPRC5B/EPHA4/WNT3A
GO:0048339	paraxial mesoderm development	0.0339695	0.0278067	ENSG00000154342/ENSG00000054598	2	WNT3A/FOXC1
GO:0072189	ureter development	0.0339695	0.0278067	ENSG00000274577/ENSG00000103241	2	LHX1/FOXF1
GO:0048732	gland development	0.0364392	0.0298282	ENSG00000105997/ENSG00000163132/ENSG00000107831/ENSG00000154342/ENSG00000103241/ENSG00000054598/ENSG00000128652	7	HOXA3/MSX1/FGF8/WNT3A/FOXF1/FOXC1/HOXD3
GO:0036342	post-anal tail morphogenesis	0.0369012	0.0302064	ENSG00000154342/ENSG00000179111	2	WNT3A/HES7
GO:0021872	forebrain generation of neurons	0.0369012	0.0302064	ENSG00000168505/ENSG00000107831/ENSG00000154342	3	GBX2/FGF8/WNT3A
GO:1904888	cranial skeletal system development	0.0369012	0.0302064	ENSG00000274577/ENSG00000105991/ENSG00000105996	3	LHX1/HOXA1/HOXA2
GO:0007379	segment specification	0.0395275	0.0323563	ENSG00000105996/ENSG00000151379	2	HOXA2/MSGN1
GO:0072176	nephric duct development	0.0395275	0.0323563	ENSG00000274577/ENSG00000116106	2	LHX1/EPHA4
GO:1900272	negative regulation of long-term synaptic potentiation	0.0395275	0.0323563	ENSG00000158528/ENSG00000116106	2	PPP1R9A/EPHA4
GO:0001649	osteoblast differentiation	0.0401299	0.0328494	ENSG00000168646/ENSG00000124216/ENSG00000105996/ENSG00000154342/ENSG00000181195	5	AXIN2/SNAI1/HOXA2/WNT3A/PENK
GO:0042474	middle ear morphogenesis	0.0429529	0.0351602	ENSG00000163132/ENSG00000105996	2	MSX1/HOXA2
GO:0050769	positive regulation of neurogenesis	0.0439527	0.0359787	ENSG00000124507/ENSG00000167191/ENSG00000149269/ENSG00000158528/ENSG00000116106/ENSG00000154342/ENSG00000128652	7	PACSIN1/GPRC5B/PAK1/PPP1R9A/EPHA4/WNT3A/HOXD3
GO:0061448	connective tissue development	0.0455331	0.0372723	ENSG00000168646/ENSG00000105997/ENSG00000124216/ENSG00000163132/ENSG00000128652	5	AXIN2/HOXA3/SNAI1/MSX1/HOXD3
GO:0046628	positive regulation of insulin receptor signaling pathway	0.0456036	0.03733	ENSG00000149269/ENSG00000095637	2	PAK1/SORBS1
GO:0090263	positive regulation of canonical Wnt signaling pathway	0.0456036	0.03733	ENSG00000167191/ENSG00000168646/ENSG00000189319/ENSG00000154342	4	GPRC5B/AXIN2/FAM53B/WNT3A
GO:0030111	regulation of Wnt signaling pathway	0.0456036	0.03733	ENSG00000167191/ENSG00000205269/ENSG00000148737/ENSG00000168646/ENSG00000189319/ENSG00000154342	6	GPRC5B/TMEM170B/TCF7L2/AXIN2/FAM53B/WNT3A
GO:0045165	cell fate commitment	0.047926	0.0392311	ENSG00000148737/ENSG00000106038/ENSG00000105996/ENSG00000107831/ENSG00000154342	5	TCF7L2/EVX1/HOXA2/FGF8/WNT3A
GO:0001759	organ induction	0.047926	0.0392311	ENSG00000107831/ENSG00000154342	2	FGF8/WNT3A
GO:0021536	diencephalon development	0.047926	0.0392311	ENSG00000168505/ENSG00000163132/ENSG00000107831	3	GBX2/MSX1/FGF8
GO:1900006	positive regulation of dendrite development	0.047926	0.0392311	ENSG00000124507/ENSG00000158528/ENSG00000116106	3	PACSIN1/PPP1R9A/EPHA4
GO:0018108	peptidyl-tyrosine phosphorylation	0.0484004	0.0396194	ENSG00000013364/ENSG00000167191/ENSG00000143479/ENSG00000116106/ENSG00000107831/ENSG00000154342	6	MVP/GPRC5B/DYRK3/EPHA4/FGF8/WNT3A
GO:0031016	pancreas development	0.0484004	0.0396194	ENSG00000148737/ENSG00000134138/ENSG00000103241	3	TCF7L2/MEIS2/FOXF1
GO:0035050	embryonic heart tube development	0.0484004	0.0396194	ENSG00000107831/ENSG00000154342/ENSG00000054598	3	FGF8/WNT3A/FOXC1
GO:0018212	peptidyl-tyrosine modification	0.0490778	0.0401739	ENSG00000013364/ENSG00000167191/ENSG00000143479/ENSG00000116106/ENSG00000107831/ENSG00000154342	6	MVP/GPRC5B/DYRK3/EPHA4/FGF8/WNT3A
GO:0021516	dorsal spinal cord development	0.0490778	0.0401739	ENSG00000274577/ENSG00000154342	2	LHX1/WNT3A
GO:1900078	positive regulation of cellular response to insulin stimulus	0.0490778	0.0401739	ENSG00000149269/ENSG00000095637	2	PAK1/SORBS1
GO:2000047	regulation of cell-cell adhesion mediated by cadherin	0.0490778	0.0401739	ENSG00000119888/ENSG00000154342	2	EPCAM/WNT3A
GO:0050730	regulation of peptidyl-tyrosine phosphorylation	0.0500605	0.0409784	ENSG00000013364/ENSG00000167191/ENSG00000116106/ENSG00000107831/ENSG00000154342	5	MVP/GPRC5B/EPHA4/FGF8/WNT3A
GO:0021954	central nervous system neuron development	0.051151	0.041871	ENSG00000168505/ENSG00000116106/ENSG00000107831	3	GBX2/EPHA4/FGF8
GO:0042481	regulation of odontogenesis	0.0520843	0.0426349	ENSG00000163132/ENSG00000107831	2	MSX1/FGF8
GO:0110110	positive regulation of animal organ morphogenesis	0.0538895	0.0441126	ENSG00000274577/ENSG00000107831/ENSG00000154342	3	LHX1/FGF8/WNT3A
GO:0021871	forebrain regionalization	0.0555566	0.0454773	ENSG00000274577/ENSG00000107831	2	LHX1/FGF8
GO:0051098	regulation of binding	0.0568241	0.0465149	ENSG00000148737/ENSG00000105997/ENSG00000116106/ENSG00000163132/ENSG00000154342/ENSG00000054598	6	TCF7L2/HOXA3/EPHA4/MSX1/WNT3A/FOXC1
GO:0010976	positive regulation of neuron projection development	0.0577599	0.0472809	ENSG00000124507/ENSG00000149269/ENSG00000158528/ENSG00000116106/ENSG00000154342	5	PACSIN1/PAK1/PPP1R9A/EPHA4/WNT3A
GO:0060914	heart formation	0.0577599	0.0472809	ENSG00000168646/ENSG00000154342	2	AXIN2/WNT3A
GO:2000679	positive regulation of transcription regulatory region DNA binding	0.0577599	0.0472809	ENSG00000154342/ENSG00000054598	2	WNT3A/FOXC1
GO:0045787	positive regulation of cell cycle	0.0577599	0.0472809	ENSG00000105146/ENSG00000143479/ENSG00000178295/ENSG00000134138/ENSG00000163132/ENSG00000107831	6	AURKC/DYRK3/GEN1/MEIS2/MSX1/FGF8
GO:0042475	odontogenesis of dentin-containing tooth	0.0581625	0.0476104	ENSG00000163132/ENSG00000107831/ENSG00000054598	3	MSX1/FGF8/FOXC1
GO:2000027	regulation of animal organ morphogenesis	0.0594459	0.048661	ENSG00000274577/ENSG00000163132/ENSG00000107831/ENSG00000154342/ENSG00000054598	5	LHX1/MSX1/FGF8/WNT3A/FOXC1
GO:0021846	cell proliferation in forebrain	0.0607338	0.0497152	ENSG00000107831/ENSG00000154342	2	FGF8/WNT3A
