# Supplementary material for: Early anteroposterior regionalisation of human neural crest is shaped by a pro-mesodermal factor
Source: eLife. 2022 Sep 26;11:e74263. doi: 10.7554/eLife.74263 (PMC9536837; doi:10.7554/eLife.74263)
Supplement: Supplementary file 8. [file elife-74263-supp8.xlsx]

## Sheet: Foglio1
Elements present only in gain of accessibility regions :	Elements present only in loss of accessibility regions :	Common elements
OCT4-SOX2-TCF-NANOG(POU,Homeobox,HMG)/mES-Oct4-ChIP-Seq(GSE11431)/Homer	CDX4(Homeobox)/ZebrafishEmbryos-Cdx4.Myc-ChIP-Seq(GSE48254)/Homer	Sox3(HMG)/NPC-Sox3-ChIP-Seq(GSE33059)/Homer
Sox10(HMG)/SciaticNerve-Sox3-ChIP-Seq(GSE35132)/Homer	Cdx2(Homeobox)/mES-Cdx2-ChIP-Seq(GSE14586)/Homer	Sox21(HMG)/ESC-SOX21-ChIP-Seq(GSE110505)/Homer
FOXM1(Forkhead)/MCF7-FOXM1-ChIP-Seq(GSE72977)/Homer	Tbx21(T-box)/GM12878-TBX21-ChIP-Seq(Encode)/Homer	Sox6(HMG)/Myotubes-Sox6-ChIP-Seq(GSE32627)/Homer
Sox15(HMG)/CPA-Sox15-ChIP-Seq(GSE62909)/Homer	Tbx6(T-box)/ESC-Tbx6-ChIP-Seq(GSE93524)/Homer	Sox2(HMG)/mES-Sox2-ChIP-Seq(GSE11431)/Homer
Sox17(HMG)/Endoderm-Sox17-ChIP-Seq(GSE61475)/Homer	HOXB13(Homeobox)/ProstateTumor-HOXB13-ChIP-Seq(GSE56288)/Homer	FOXA1(Forkhead)/MCF7-FOXA1-ChIP-Seq(GSE26831)/Homer
Fox:Ebox(Forkhead,bHLH)/Panc1-Foxa2-ChIP-Seq(GSE47459)/Homer	Tbet(T-box)/CD8-Tbet-ChIP-Seq(GSE33802)/Homer	FOXA1(Forkhead)/LNCAP-FOXA1-ChIP-Seq(GSE27824)/Homer
Foxa2(Forkhead)/Liver-Foxa2-ChIP-Seq(GSE25694)/Homer	Brachyury(T-box)/Mesoendoderm-Brachyury-ChIP-exo(GSE54963)/Homer	Oct4(POU,Homeobox)/mES-Oct4-ChIP-Seq(GSE11431)/Homer
Sox4(HMG)/proB-Sox4-ChIP-Seq(GSE50066)/Homer	Tbr1(T-box)/Cortex-Tbr1-ChIP-Seq(GSE71384)/Homer	Foxa3(Forkhead)/Liver-Foxa3-ChIP-Seq(GSE77670)/Homer
Sox9(HMG)/Limb-SOX9-ChIP-Seq(GSE73225)/Homer	Eomes(T-box)/H9-Eomes-ChIP-Seq(GSE26097)/Homer	Zic(Zf)/Cerebellum-ZIC1.2-ChIP-Seq(GSE60731)/Homer
Sox7(HMG)/ESC-Sox7-ChIP-Seq(GSE133899)/Homer	Hoxa11(Homeobox)/ChickenMSG-Hoxa11.Flag-ChIP-Seq(GSE86088)/Homer	Zic3(Zf)/mES-Zic3-ChIP-Seq(GSE37889)/Homer
Oct11(POU,Homeobox)/NCIH1048-POU2F3-ChIP-seq(GSE115123)/Homer	Hoxd13(Homeobox)/ChickenMSG-Hoxd13.Flag-ChIP-Seq(GSE86088)/Homer	Oct6(POU,Homeobox)/NPC-Pou3f1-ChIP-Seq(GSE35496)/Homer
Oct2(POU,Homeobox)/Bcell-Oct2-ChIP-Seq(GSE21512)/Homer	Hoxd11(Homeobox)/ChickenMSG-Hoxd11.Flag-ChIP-Seq(GSE86088)/Homer	FoxD3(forkhead)/ZebrafishEmbryo-Foxd3.biotin-ChIP-seq(GSE106676)/Homer
Ascl2(bHLH)/ESC-Ascl2-ChIP-Seq(GSE97712)/Homer	Unknown(Homeobox)/Limb-p300-ChIP-Seq/Homer	Brn1(POU,Homeobox)/NPC-Brn1-ChIP-Seq(GSE35496)/Homer
ZFX(Zf)/mES-Zfx-ChIP-Seq(GSE11431)/Homer	Hoxa13(Homeobox)/ChickenMSG-Hoxa13.Flag-ChIP-Seq(GSE86088)/Homer	Unknown-ESC-element(?)/mES-Nanog-ChIP-Seq(GSE11724)/Homer
Oct4:Sox17(POU,Homeobox,HMG)/F9-Sox17-ChIP-Seq(GSE44553)/Homer	Tbx5(T-box)/HL1-Tbx5.biotin-ChIP-Seq(GSE21529)/Homer	FoxL2(Forkhead)/Ovary-FoxL2-ChIP-Seq(GSE60858)/Homer
Hnf6b(Homeobox)/LNCaP-Hnf6b-ChIP-Seq(GSE106305)/Homer	Hoxd10(Homeobox)/ChickenMSG-Hoxd10.Flag-ChIP-Seq(GSE86088)/Homer	Zic2(Zf)/ESC-Zic2-ChIP-Seq(SRP197560)/Homer
E2A(bHLH)/proBcell-E2A-ChIP-Seq(GSE21978)/Homer	Hoxc9(Homeobox)/Ainv15-Hoxc9-ChIP-Seq(GSE21812)/Homer	Foxf1(Forkhead)/Lung-Foxf1-ChIP-Seq(GSE77951)/Homer
Foxh1(Forkhead)/hESC-FOXH1-ChIP-Seq(GSE29422)/Homer	Olig2(bHLH)/Neuron-Olig2-ChIP-Seq(GSE30882)/Homer	Foxo3(Forkhead)/U2OS-Foxo3-ChIP-Seq(E-MTAB-2701)/Homer
THRb(NR)/Liver-NR1A2-ChIP-Seq(GSE52613)/Homer	PBX2(Homeobox)/K562-PBX2-ChIP-Seq(Encode)/Homer	FOXK1(Forkhead)/HEK293-FOXK1-ChIP-Seq(GSE51673)/Homer
NFIL3(bZIP)/HepG2-NFIL3-ChIP-Seq(Encode)/Homer	Pdx1(Homeobox)/Islet-Pdx1-ChIP-Seq(SRA008281)/Homer	FOXP1(Forkhead)/H9-FOXP1-ChIP-Seq(GSE31006)/Homer
REST-NRSF(Zf)/Jurkat-NRSF-ChIP-Seq/Homer	Meis1(Homeobox)/MastCells-Meis1-ChIP-Seq(GSE48085)/Homer	Foxo1(Forkhead)/RAW-Foxo1-ChIP-Seq(Fan_et_al.)/Homer
PAX3:FKHR-fusion(Paired,Homeobox)/Rh4-PAX3:FKHR-ChIP-Seq(GSE19063)/Homer	Hoxb4(Homeobox)/ES-Hoxb4-ChIP-Seq(GSE34014)/Homer	FOXK2(Forkhead)/U2OS-FOXK2-ChIP-Seq(E-MTAB-2204)/Homer
Pit1(Homeobox)/GCrat-Pit1-ChIP-Seq(GSE58009)/Homer	HOXA1(Homeobox)/mES-Hoxa1-ChIP-Seq(SRP084292)/Homer	LEF1(HMG)/H1-LEF1-ChIP-Seq(GSE64758)/Homer
RARa(NR)/K562-RARa-ChIP-Seq(Encode)/Homer	HOXA2(Homeobox)/mES-Hoxa2-ChIP-Seq(Donaldson_et_al.)/Homer	SCL(bHLH)/HPC7-Scl-ChIP-Seq(GSE13511)/Homer
CRX(Homeobox)/Retina-Crx-ChIP-Seq(GSE20012)/Homer	Etv2(ETS)/ES-ER71-ChIP-Seq(GSE59402)/Homer	Tcf7(HMG)/GM12878-TCF7-ChIP-Seq(Encode)/Homer
PR(NR)/T47D-PR-ChIP-Seq(GSE31130)/Homer	ERG(ETS)/VCaP-ERG-ChIP-Seq(GSE14097)/Homer	GLIS3(Zf)/Thyroid-Glis3.GFP-ChIP-Seq(GSE103297)/Homer
p53(p53)/mES-cMyc-ChIP-Seq(GSE11431)/Homer	EWS:FLI1-fusion(ETS)/SK_N_MC-EWS:FLI1-ChIP-Seq(SRA014231)/Homer	Tcf12(bHLH)/GM12878-Tcf12-ChIP-Seq(GSE32465)/Homer
RXR(NR),DR1/3T3L1-RXR-ChIP-Seq(GSE13511)/Homer	EWS:ERG-fusion(ETS)/CADO_ES1-EWS:ERG-ChIP-Seq(SRA014231)/Homer	AP-2alpha(AP2)/Hela-AP2alpha-ChIP-Seq(GSE31477)/Homer
AR-halfsite(NR)/LNCaP-AR-ChIP-Seq(GSE27824)/Homer	ETV1(ETS)/GIST48-ETV1-ChIP-Seq(GSE22441)/Homer	AP-2gamma(AP2)/MCF7-TFAP2C-ChIP-Seq(GSE21234)/Homer
PPARa(NR),DR1/Liver-Ppara-ChIP-Seq(GSE47954)/Homer	TATA-Box(TBP)/Promoter/Homer	EBF1(EBF)/Near-E2A-ChIP-Seq(GSE21512)/Homer
NF1:FOXA1(CTF,Forkhead)/LNCAP-FOXA1-ChIP-Seq(GSE27824)/Homer	ETS1(ETS)/Jurkat-ETS1-ChIP-Seq(GSE17954)/Homer	Ap4(bHLH)/AML-Tfap4-ChIP-Seq(GSE45738)/Homer
CHR(?)/Hela-CellCycle-Expression/Homer	Fos(bZIP)/TSC-Fos-ChIP-Seq(GSE110950)/Homer	Rfx2(HTH)/LoVo-RFX2-ChIP-Seq(GSE49402)/Homer
HNF6(Homeobox)/Liver-Hnf6-ChIP-Seq(ERP000394)/Homer	Atf3(bZIP)/GBM-ATF3-ChIP-Seq(GSE33912)/Homer	Nkx6.1(Homeobox)/Islet-Nkx6.1-ChIP-Seq(GSE40975)/Homer
COUP-TFII(NR)/Artia-Nr2f2-ChIP-Seq(GSE46497)/Homer	Fli1(ETS)/CD8-FLI-ChIP-Seq(GSE20898)/Homer	MafA(bZIP)/Islet-MafA-ChIP-Seq(GSE30298)/Homer
BORIS(Zf)/K562-CTCFL-ChIP-Seq(GSE32465)/Homer	Rbpj1(?)/Panc1-Rbpj1-ChIP-Seq(GSE47459)/Homer	Tgif1(Homeobox)/mES-Tgif1-ChIP-Seq(GSE55404)/Homer
ZNF317(Zf)/HEK293-ZNF317.GFP-ChIP-Seq(GSE58341)/Homer	JunB(bZIP)/DendriticCells-Junb-ChIP-Seq(GSE36099)/Homer	Tcf21(bHLH)/ArterySmoothMuscle-Tcf21-ChIP-Seq(GSE61369)/Homer
ZNF41(Zf)/HEK293-ZNF41.GFP-ChIP-Seq(GSE58341)/Homer	GABPA(ETS)/Jurkat-GABPa-ChIP-Seq(GSE17954)/Homer	RFX(HTH)/K562-RFX3-ChIP-Seq(SRA012198)/Homer
Gli2(Zf)/GM2-Gli2-ChIP-Chip(GSE112702)/Homer	ETV4(ETS)/HepG2-ETV4-ChIP-Seq(ENCODE)/Homer	En1(Homeobox)/SUM149-EN1-ChIP-Seq(GSE120957)/Homer
E2F3(E2F)/MEF-E2F3-ChIP-Seq(GSE71376)/Homer	BMYB(HTH)/Hela-BMYB-ChIP-Seq(GSE27030)/Homer	Lhx3(Homeobox)/Neuron-Lhx3-ChIP-Seq(GSE31456)/Homer
OCT:OCT-short(POU,Homeobox)/NPC-OCT6-ChIP-Seq(GSE43916)/Homer	BATF(bZIP)/Th17-BATF-ChIP-Seq(GSE39756)/Homer	EBF2(EBF)/BrownAdipose-EBF2-ChIP-Seq(GSE97114)/Homer
p73(p53)/Trachea-p73-ChIP-Seq(PRJNA310161)/Homer	Fra2(bZIP)/Striatum-Fra2-ChIP-Seq(GSE43429)/Homer	Tcf3(HMG)/mES-Tcf3-ChIP-Seq(GSE11724)/Homer
RUNX(Runt)/HPC7-Runx1-ChIP-Seq(GSE22178)/Homer	Jun-AP1(bZIP)/K562-cJun-ChIP-Seq(GSE31477)/Homer	Ascl1(bHLH)/NeuralTubes-Ascl1-ChIP-Seq(GSE55840)/Homer
CTCF(Zf)/CD4+-CTCF-ChIP-Seq(Barski_et_al.)/Homer	EHF(ETS)/LoVo-EHF-ChIP-Seq(GSE49402)/Homer	Lhx2(Homeobox)/HFSC-Lhx2-ChIP-Seq(GSE48068)/Homer
RUNX-AML(Runt)/CD4+-PolII-ChIP-Seq(Barski_et_al.)/Homer	Elf4(ETS)/BMDM-Elf4-ChIP-Seq(GSE88699)/Homer	MyoD(bHLH)/Myotube-MyoD-ChIP-Seq(GSE21614)/Homer
RUNX1(Runt)/Jurkat-RUNX1-ChIP-Seq(GSE29180)/Homer	Fosl2(bZIP)/3T3L1-Fosl2-ChIP-Seq(GSE56872)/Homer	Isl1(Homeobox)/Neuron-Isl1-ChIP-Seq(GSE31456)/Homer
Egr2(Zf)/Thymocytes-Egr2-ChIP-Seq(GSE34254)/Homer	Fra1(bZIP)/BT549-Fra1-ChIP-Seq(GSE46166)/Homer	MyoG(bHLH)/C2C12-MyoG-ChIP-Seq(GSE36024)/Homer
Gfi1b(Zf)/HPC7-Gfi1b-ChIP-Seq(GSE22178)/Homer	KLF1(Zf)/HUDEP2-KLF1-CutnRun(GSE136251)/Homer	Rfx1(HTH)/NPC-H3K4me1-ChIP-Seq(GSE16256)/Homer
Rfx5(HTH)/GM12878-Rfx5-ChIP-Seq(GSE31477)/Homer	Nkx2.1(Homeobox)/LungAC-Nkx2.1-ChIP-Seq(GSE43252)/Homer	Twist2(bHLH)/Myoblast-Twist2.Ty1-ChIP-Seq(GSE127998)/Homer
	Zfp281(Zf)/ES-Zfp281-ChIP-Seq(GSE81042)/Homer	DLX2(Homeobox)/BasalGanglia-Dlx2-ChIP-seq(GSE124936)/Homer
	Six2(Homeobox)/NephronProgenitor-Six2-ChIP-Seq(GSE39837)/Homer	X-box(HTH)/NPC-H3K4me1-ChIP-Seq(GSE16256)/Homer
	Six1(Homeobox)/Myoblast-Six1-ChIP-Chip(GSE20150)/Homer	Lhx1(Homeobox)/EmbryoCarcinoma-Lhx1-ChIP-Seq(GSE70957)/Homer
	Klf9(Zf)/GBM-Klf9-ChIP-Seq(GSE62211)/Homer	Nanog(Homeobox)/mES-Nanog-ChIP-Seq(GSE11724)/Homer
	Ets1-distal(ETS)/CD4+-PolII-ChIP-Seq(Barski_et_al.)/Homer	TCFL2(HMG)/K562-TCF7L2-ChIP-Seq(GSE29196)/Homer
	Nkx2.2(Homeobox)/NPC-Nkx2.2-ChIP-Seq(GSE61673)/Homer	Myf5(bHLH)/GM-Myf5-ChIP-Seq(GSE24852)/Homer
	Gata4(Zf)/Heart-Gata4-ChIP-Seq(GSE35151)/Homer	LHX9(Homeobox)/Hct116-LHX9.V5-ChIP-Seq(GSE116822)/Homer
	Bapx1(Homeobox)/VertebralCol-Bapx1-ChIP-Seq(GSE36672)/Homer	BHLHA15(bHLH)/NIH3T3-BHLHB8.HA-ChIP-Seq(GSE119782)/Homer
	Pitx1:Ebox(Homeobox,bHLH)/Hindlimb-Pitx1-ChIP-Seq(GSE41591)/Homer	Zac1(Zf)/Neuro2A-Plagl1-ChIP-Seq(GSE75942)/Homer
	ZNF467(Zf)/HEK293-ZNF467.GFP-ChIP-Seq(GSE58341)/Homer	TCF4(bHLH)/SHSY5Y-TCF4-ChIP-Seq(GSE96915)/Homer
	SPDEF(ETS)/VCaP-SPDEF-ChIP-Seq(SRA014231)/Homer	NeuroD1(bHLH)/Islet-NeuroD1-ChIP-Seq(GSE30298)/Homer
	ELF3(ETS)/PDAC-ELF3-ChIP-Seq(GSE64557)/Homer	Atoh1(bHLH)/Cerebellum-Atoh1-ChIP-Seq(GSE22111)/Homer
	PU.1(ETS)/ThioMac-PU.1-ChIP-Seq(GSE21512)/Homer	HLF(bZIP)/HSC-HLF.Flag-ChIP-Seq(GSE69817)/Homer
	Bach2(bZIP)/OCILy7-Bach2-ChIP-Seq(GSE44420)/Homer	MafB(bZIP)/BMM-Mafb-ChIP-Seq(GSE75722)/Homer
	Gata6(Zf)/HUG1N-GATA6-ChIP-Seq(GSE51936)/Homer	Sp5(Zf)/mES-Sp5.Flag-ChIP-Seq(GSE72989)/Homer
	KLF10(Zf)/HEK293-KLF10.GFP-ChIP-Seq(GSE58341)/Homer	ZNF711(Zf)/SHSY5Y-ZNF711-ChIP-Seq(GSE20673)/Homer
	Bach1(bZIP)/K562-Bach1-ChIP-Seq(GSE31477)/Homer	TEAD3(TEA)/HepG2-TEAD3-ChIP-Seq(Encode)/Homer
	Gata2(Zf)/K562-GATA2-ChIP-Seq(GSE18829)/Homer	NeuroG2(bHLH)/Fibroblast-NeuroG2-ChIP-Seq(GSE75910)/Homer
	ELF5(ETS)/T47D-ELF5-ChIP-Seq(GSE30407)/Homer	KLF14(Zf)/HEK293-KLF14.GFP-ChIP-Seq(GSE58341)/Homer
	KLF5(Zf)/LoVo-KLF5-ChIP-Seq(GSE49402)/Homer	Maz(Zf)/HepG2-Maz-ChIP-Seq(GSE31477)/Homer
	Egr1(Zf)/K562-Egr1-ChIP-Seq(GSE32465)/Homer	TEAD(TEA)/Fibroblast-PU.1-ChIP-Seq(Unpublished)/Homer
	MafK(bZIP)/C2C12-MafK-ChIP-Seq(GSE36030)/Homer	EBF(EBF)/proBcell-EBF-ChIP-Seq(GSE21978)/Homer
	RBPJ:Ebox(?,bHLH)/Panc1-Rbpj1-ChIP-Seq(GSE47459)/Homer	Znf263(Zf)/K562-Znf263-ChIP-Seq(GSE31477)/Homer
	Bcl11a(Zf)/HSPC-BCL11A-ChIP-Seq(GSE104676)/Homer	FOXA1:AR(Forkhead,NR)/LNCAP-AR-ChIP-Seq(GSE27824)/Homer
	Nrf2(bZIP)/Lymphoblast-Nrf2-ChIP-Seq(GSE37589)/Homer	Dlx3(Homeobox)/Kerainocytes-Dlx3-ChIP-Seq(GSE89884)/Homer
	ETS:E-box(ETS,bHLH)/HPC7-Scl-ChIP-Seq(GSE22178)/Homer	TEAD1(TEAD)/HepG2-TEAD1-ChIP-Seq(Encode)/Homer
	Gata1(Zf)/K562-GATA1-ChIP-Seq(GSE18829)/Homer	Sp2(Zf)/HEK293-Sp2.eGFP-ChIP-Seq(Encode)/Homer
	Srebp1a(bHLH)/HepG2-Srebp1a-ChIP-Seq(GSE31477)/Homer	CEBP:AP1(bZIP)/ThioMac-CEBPb-ChIP-Seq(GSE21512)/Homer
	Prop1(Homeobox)/GHFT1-PROP1.biotin-ChIP-Seq(GSE77302)/Homer	TEAD4(TEA)/Tropoblast-Tead4-ChIP-Seq(GSE37350)/Homer
	KLF3(Zf)/MEF-Klf3-ChIP-Seq(GSE44748)/Homer	HEB(bHLH)/mES-Heb-ChIP-Seq(GSE53233)/Homer
	NFE2L2(bZIP)/HepG2-NFE2L2-ChIP-Seq(Encode)/Homer	Tbx20(T-box)/Heart-Tbx20-ChIP-Seq(GSE29636)/Homer
	Srebp2(bHLH)/HepG2-Srebp2-ChIP-Seq(GSE31477)/Homer	ZBTB18(Zf)/HEK293-ZBTB18.GFP-ChIP-Seq(GSE58341)/Homer
	Nkx2.5(Homeobox)/HL1-Nkx2.5.biotin-ChIP-Seq(GSE21529)/Homer	Nkx3.1(Homeobox)/LNCaP-Nkx3.1-ChIP-Seq(GSE28264)/Homer
	PU.1-IRF(ETS:IRF)/Bcell-PU.1-ChIP-Seq(GSE21512)/Homer	WT1(Zf)/Kidney-WT1-ChIP-Seq(GSE90016)/Homer
	Pax7(Paired,Homeobox),long/Myoblast-Pax7-ChIP-Seq(GSE25064)/Homer	Ptf1a(bHLH)/Panc1-Ptf1a-ChIP-Seq(GSE47459)/Homer
	FXR(NR),IR1/Liver-FXR-ChIP-Seq(Chong_et_al.)/Homer	DLX5(Homeobox)/BasalGanglia-Dlx5-ChIP-seq(GSE124936)/Homer
	GATA3(Zf)/iTreg-Gata3-ChIP-Seq(GSE20898)/Homer	Tgif2(Homeobox)/mES-Tgif2-ChIP-Seq(GSE55404)/Homer
	IRF4(IRF)/GM12878-IRF4-ChIP-Seq(GSE32465)/Homer	Atf4(bZIP)/MEF-Atf4-ChIP-Seq(GSE35681)/Homer
	CUX1(Homeobox)/K562-CUX1-ChIP-Seq(GSE92882)/Homer	Erra(NR)/HepG2-Erra-ChIP-Seq(GSE31477)/Homer
	Phox2a(Homeobox)/Neuron-Phox2a-ChIP-Seq(GSE31456)/Homer	DLX1(Homeobox)/BasalGanglia-Dlx1-ChIP-seq(GSE124936)/Homer
	PSE(SNAPc)/K562-mStart-Seq/Homer	MYB(HTH)/ERMYB-Myb-ChIPSeq(GSE22095)/Homer
	Max(bHLH)/K562-Max-ChIP-Seq(GSE31477)/Homer	ZNF341(Zf)/EBV-ZNF341-ChIP-Seq(GSE113194)/Homer
	ZNF416(Zf)/HEK293-ZNF416.GFP-ChIP-Seq(GSE58341)/Homer	Chop(bZIP)/MEF-Chop-ChIP-Seq(GSE35681)/Homer
	Pax7(Paired,Homeobox)/Myoblast-Pax7-ChIP-Seq(GSE25064)/Homer	Nur77(NR)/K562-NR4A1-ChIP-Seq(GSE31363)/Homer
	NF-E2(bZIP)/K562-NFE2-ChIP-Seq(GSE31477)/Homer	TEAD2(TEA)/Py2T-Tead2-ChIP-Seq(GSE55709)/Homer
	CEBP(bZIP)/ThioMac-CEBPb-ChIP-Seq(GSE21512)/Homer	E2F6(E2F)/Hela-E2F6-ChIP-Seq(GSE31477)/Homer
	Hoxa10(Homeobox)/ChickenMSG-Hoxa10.Flag-ChIP-Seq(GSE86088)/Homer	AMYB(HTH)/Testes-AMYB-ChIP-Seq(GSE44588)/Homer
	Pbx3(Homeobox)/GM12878-PBX3-ChIP-Seq(GSE32465)/Homer	Hoxa9(Homeobox)/ChickenMSG-Hoxa9.Flag-ChIP-Seq(GSE86088)/Homer
	MNT(bHLH)/HepG2-MNT-ChIP-Seq(Encode)/Homer	ZNF7(Zf)/HepG2-ZNF7.Flag-ChIP-Seq(Encode)/Homer
	NF1-halfsite(CTF)/LNCaP-NF1-ChIP-Seq(Unpublished)/Homer	TRPS1(Zf)/MCF7-TRPS1-ChIP-Seq(GSE107013)/Homer
	ZNF652/HepG2-ZNF652.Flag-ChIP-Seq(Encode)/Homer	Pitx1(Homeobox)/Chicken-Pitx1-ChIP-Seq(GSE38910)/Homer
	PBX1(Homeobox)/MCF7-PBX1-ChIP-Seq(GSE28007)/Homer	Barx1(Homeobox)/Stomach-Barx1.3xFlag-ChIP-Seq(GSE69483)/Homer
	Elk1(ETS)/Hela-Elk1-ChIP-Seq(GSE31477)/Homer	LRF(Zf)/Erythroblasts-ZBTB7A-ChIP-Seq(GSE74977)/Homer
	PAX5(Paired,Homeobox)/GM12878-PAX5-ChIP-Seq(GSE32465)/Homer	KLF6(Zf)/PDAC-KLF6-ChIP-Seq(GSE64557)/Homer
	Tlx?(NR)/NPC-H3K4me1-ChIP-Seq(GSE16256)/Homer	Hoxd12(Homeobox)/ChickenMSG-Hoxd12.Flag-ChIP-Seq(GSE86088)/Homer
	NPAS(bHLH)/Liver-NPAS-ChIP-Seq(GSE39860)/Homer	PPARE(NR),DR1/3T3L1-Pparg-ChIP-Seq(GSE13511)/Homer
	PAX5(Paired,Homeobox),condensed/GM12878-PAX5-ChIP-Seq(GSE32465)/Homer	AP-1(bZIP)/ThioMac-PU.1-ChIP-Seq(GSE21512)/Homer
	CEBP:CEBP(bZIP)/MEF-Chop-ChIP-Seq(GSE35681)/Homer	Six4(Homeobox)/MCF7-SIX4-ChIP-Seq(Encode)/Homer
	Mef2b(MADS)/HEK293-Mef2b.V5-ChIP-Seq(GSE67450)/Homer
	CLOCK(bHLH)/Liver-Clock-ChIP-Seq(GSE39860)/Homer
	Pknox1(Homeobox)/ES-Prep1-ChIP-Seq(GSE63282)/Homer
